# Supplementary material
Source: PubMed Central journal article supplement (PMC4159654)

**Supplementary Table 3 : HCD identified *Acinetobacter baumannii* (strain SDF) glycopeptides**

| Uniprot number | Protein name                                                                                    | parent mass | charge | Precursor MH+ | glycan mass | glycan composition | peptide mass | peptide                                                        | mass | mascot ion score | Page |
|----------------|-------------------------------------------------------------------------------------------------|-------------|--------|---------------|-------------|--------------------|--------------|----------------------------------------------------------------|------|------------------|------|
| B0VKNG6_ACIBS  | Uncharacterized protein [ABSDF2966] [ <i>Acinetobacter baumannii</i> (strain SDF)]              | 618.642     | 3      | 1853.93       | 884.3599    | HexNAc2-Hex-316    | 969.573      | <sup>302</sup> AKPASTPAVK <sup>311</sup>                       | 40   | 4                |      |
| B0VLI0_A_CIBS  | B0VLI0_ACIBS Uncharacterized protein [ABSDF1485] [ <i>Acinetobacter baumannii</i> (strain SDF)] | 959.750     | 3      | 2877.26       | 884.311     | HexNAc2-Hex-316    | 1992.95      | <sup>47</sup> KSAGDQAASDIATATDNASAK <sup>67</sup>              | 69   | 5                |      |
| B0VLI0_A_CIBS  | B0VLI0_ACIBS Uncharacterized protein [ABSDF1485] [ <i>Acinetobacter baumannii</i> (strain SDF)] | 807.028     | 3      | 2419.09       | 884.3576    | HexNAc2-Hex-316    | 1534.73      | <sup>52</sup> QAASDIATATDNASAK <sup>67</sup>                   | 80   | 6                |      |
| B0VLI0_A_CIBS  | B0VLI0_ACIBS Uncharacterized protein [ABSDF1485] [ <i>Acinetobacter baumannii</i> (strain SDF)] | 917.398     | 3      | 2750.20       | 884.3674    | HexNAc2-Hex-316    | 1865.84      | <sup>48</sup> SAGDQAASDIATATDN(+1)ASAK <sup>67</sup>           | 35   | 7                |      |
| B0VLI0_A_CIBS  | B0VLI0_ACIBS Uncharacterized protein [ABSDF1485] [ <i>Acinetobacter baumannii</i> (strain SDF)] | 821.680     | 3      | 2463.05       | 884.3599    | HexNAc2-Hex-316    | 1578.69      | <sup>48</sup> SAGDQAASDIATATDNA <sup>66</sup>                  | 36   | 8                |      |
| B0VLI0_A_CIBS  | B0VLI0_ACIBS Uncharacterized protein [ABSDF1485] [ <i>Acinetobacter baumannii</i> (strain SDF)] | 757.674     | 3      | 2271.03       | 406.1779    | HexNAc2            | 1864.85      | <sup>48</sup> SAGDQAASDIATATDNASAK <sup>67</sup>               | 99   | 9                |      |
| B0VLI0_A_CIBS  | B0VLI0_ACIBS Uncharacterized protein [ABSDF1485] [ <i>Acinetobacter baumannii</i> (strain SDF)] | 917.396     | 3      | 2750.19       | 884.3586    | HexNAc2-Hex-316    | 1865.84      | <sup>48</sup> SAGDQ(+1)AASDIATATDNASAK <sup>67</sup>           | 79   | 10               |      |
| B0VLI0_A_CIBS  | B0VLI0_ACIBS Uncharacterized protein [ABSDF1485] [ <i>Acinetobacter baumannii</i> (strain SDF)] | 906.417     | 4      | 3622.67       | 406.1858    | HexNAc2            | 3216.49      | <sup>48</sup> SAGDQAASDIATATDNASAKIDAATDHAADATAK <sup>81</sup> | 132  | 11               |      |

|                  |                                                                                         |          |   |         |          |                             |         |                                                                |     |    |
|------------------|-----------------------------------------------------------------------------------------|----------|---|---------|----------|-----------------------------|---------|----------------------------------------------------------------|-----|----|
| B0VLI0_A<br>CIBS | B0VLI0_ACIBS Uncharacterized protein [ABSDF1485] [Acinetobacter baumannii (strain SDF)] | 1036.467 | 4 | 4142.87 | 926.3854 | HexNAc2-<br>Hex-358         | 3216.49 | <sup>48</sup> SAGDQAASDIATATDNASAKIDAATDHAADATAK <sup>81</sup> | 86  | 12 |
| B0VRK6_<br>ACIBS | Uncharacterized protein [ABSDF2200] [Acinetobacter baumannii (strain SDF)]              | 797.371  | 3 | 2390.12 | 884.3623 | HexNAc2-<br>Hex-316         | 1505.76 | <sup>184</sup> AASEPEQKVEYVR <sup>196</sup>                    | 71  | 13 |
| B0VSH8_<br>ACIBS | Uncharacterized protein [ABSDF0746] [Acinetobacter baumannii (strain SDF)]              | 637.973  | 3 | 1911.93 | 406.1839 | HexNAc2                     | 1505.74 | <sup>40</sup> STAKDEQPASSASVK <sup>54</sup>                    | 102 | 14 |
| B0VV82_<br>ACIBS | Uncharacterized protein [ABSDF2905] [Acinetobacter baumannii (strain SDF)]              | 897.386  | 3 | 2690.17 | 1290.502 | two glycans;<br>884 and 406 | 1399.64 | <sup>65</sup> AAASETAAASEAAAAH <sup>80</sup>                   | 81  | 15 |
| B0VV82_<br>ACIBS | Uncharacterized protein [ABSDF2905] [Acinetobacter baumannii (strain SDF)]              | 873.707  | 3 | 2619.13 | 1290.521 | two glycans;<br>884 and 406 | 1328.61 | <sup>66</sup> AASETAAASEAAAAH <sup>80</sup>                    | 72  | 16 |
| B0VV82_<br>ACIBS | Uncharacterized protein [ABSDF2905] [Acinetobacter baumannii (strain SDF)]              | 887.709  | 3 | 2661.13 | 1332.534 | two glycans;<br>926 and 406 | 1328.6  | <sup>66</sup> AASETAAASEAAAAH <sup>80</sup>                    | 67  | 17 |
| B0VV82_<br>ACIBS | Uncharacterized protein [ABSDF2905] [Acinetobacter baumannii (strain SDF)]              | 781.697  | 3 | 2343.10 | 884.3551 | HexNAc2-<br>Hex-316         | 1458.74 | <sup>22</sup> SKKEEAPAAASEAVA <sup>36</sup>                    | 83  | 18 |
| B0VV82_<br>ACIBS | Uncharacterized protein [ABSDF2905] [Acinetobacter baumannii (strain SDF)]              | 795.703  | 3 | 2385.12 | 926.3746 | HexNAc2-<br>Hex-358         | 1458.74 | <sup>22</sup> SKKEEAPAAASEAVA <sup>36</sup>                    | 67  | 19 |
| B0VV82_<br>ACIBS | Uncharacterized protein [ABSDF2905] [Acinetobacter baumannii (strain SDF)]              | 669.663  | 3 | 2007.00 | 406.1806 | HexNAc2                     | 1600.82 | <sup>22</sup> SKKEEAPAAASEAVAAA <sup>38</sup>                  | 32  | 20 |
| B0VV82_<br>ACIBS | Uncharacterized protein [ABSDF2905] [Acinetobacter baumannii (strain SDF)]              | 843.059  | 3 | 2527.18 | 926.3658 | HexNAc2-<br>Hex-358         | 1600.82 | <sup>22</sup> SKKEEAPAAASEAVAAA <sup>38</sup>                  | 61  | 21 |

|                  |                                                                                     |          |   |         |          |                     |         |                                                       |    |    |
|------------------|-------------------------------------------------------------------------------------|----------|---|---------|----------|---------------------|---------|-------------------------------------------------------|----|----|
| B0VV82_<br>ACIBS | Uncharacterized protein<br>[ABSDF2905] [Acinetobacter<br>baumannii<br>(strain SDF)] | 822.730  | 3 | 2466.20 | 406.1846 | HexNAc2             | 2060.01 | <sup>22</sup> SKKEEAPAAASEAVAAASEATA <sup>43</sup>    | 65 | 22 |
| B0VV82_<br>ACIBS | Uncharacterized protein<br>[ABSDF2905] [Acinetobacter<br>baumannii<br>(strain SDF)] | 1005.804 | 3 | 3015.42 | 884.3689 | HexNAc2-<br>Hex-316 | 2131.05 | <sup>22</sup> SKKEEAPAAASEAVAAASEATAA <sup>44</sup>   | 70 | 23 |
| B0VV82_<br>ACIBS | Uncharacterized protein<br>[ABSDF2905] [Acinetobacter<br>baumannii<br>(strain SDF)] | 1019.807 | 3 | 3057.43 | 926.3788 | HexNAc2-<br>Hex-358 | 2131.05 | <sup>22</sup> SKKEEAPAAASEAVAAASEATAA <sup>44</sup>   | 81 | 24 |
| B0VV82_<br>ACIBS | Uncharacterized protein<br>[ABSDF2905] [Acinetobacter<br>baumannii<br>(strain SDF)] | 870.085  | 3 | 2608.26 | 406.1747 | HexNAc2             | 2202.09 | <sup>22</sup> SKKEEAPAAASEAVAAASEATAAA <sup>45</sup>  | 42 | 25 |
| B0VV82_<br>ACIBS | Uncharacterized protein<br>[ABSDF2905] [Acinetobacter<br>baumannii<br>(strain SDF)] | 1043.482 | 3 | 3128.46 | 926.3667 | HexNAc2-<br>Hex-358 | 2202.09 | <sup>22</sup> SKKEEAPAAASEAVAAASEATAAA <sup>45</sup>  | 69 | 26 |
| B0VV82_<br>ACIBS | Uncharacterized protein<br>[ABSDF2905] [Acinetobacter<br>baumannii<br>(strain SDF)] | 893.768  | 3 | 2679.31 | 406.1852 | HexNAc2             | 2273.13 | <sup>22</sup> SKKEEAPAAASEAVAAASEATAAAA <sup>46</sup> | 79 | 27 |
| B0VV82_<br>ACIBS | Uncharacterized protein<br>[ABSDF2905] [Acinetobacter<br>baumannii<br>(strain SDF)] | 1053.156 | 3 | 3157.48 | 884.3503 | HexNAc2-<br>Hex-316 | 2273.13 | <sup>22</sup> SKKEEAPAAASEAVAAASEATAAAA <sup>46</sup> | 88 | 28 |
| B0VV82_<br>ACIBS | Uncharacterized protein<br>[ABSDF2905] [Acinetobacter<br>baumannii<br>(strain SDF)] | 1067.163 | 3 | 3199.50 | 926.3719 | HexNAc2-<br>Hex-358 | 2273.13 | <sup>22</sup> SKKEEAPAAASEAVAAASEATAAAA <sup>46</sup> | 77 | 29 |

**Supplementary Table 3:** Identifications are labeled according to the corresponding Uniprot accession number and protein name of *A. baumannii* strain SDF the parent m/z, charge state, deconvoluted mass, glycan mass, glycan composition, peptide mass, peptide sequence and mascot ion score are provided for each identified glycopeptide. All identified glycopeptide HCD spectra are provided and are available on the designated pages.

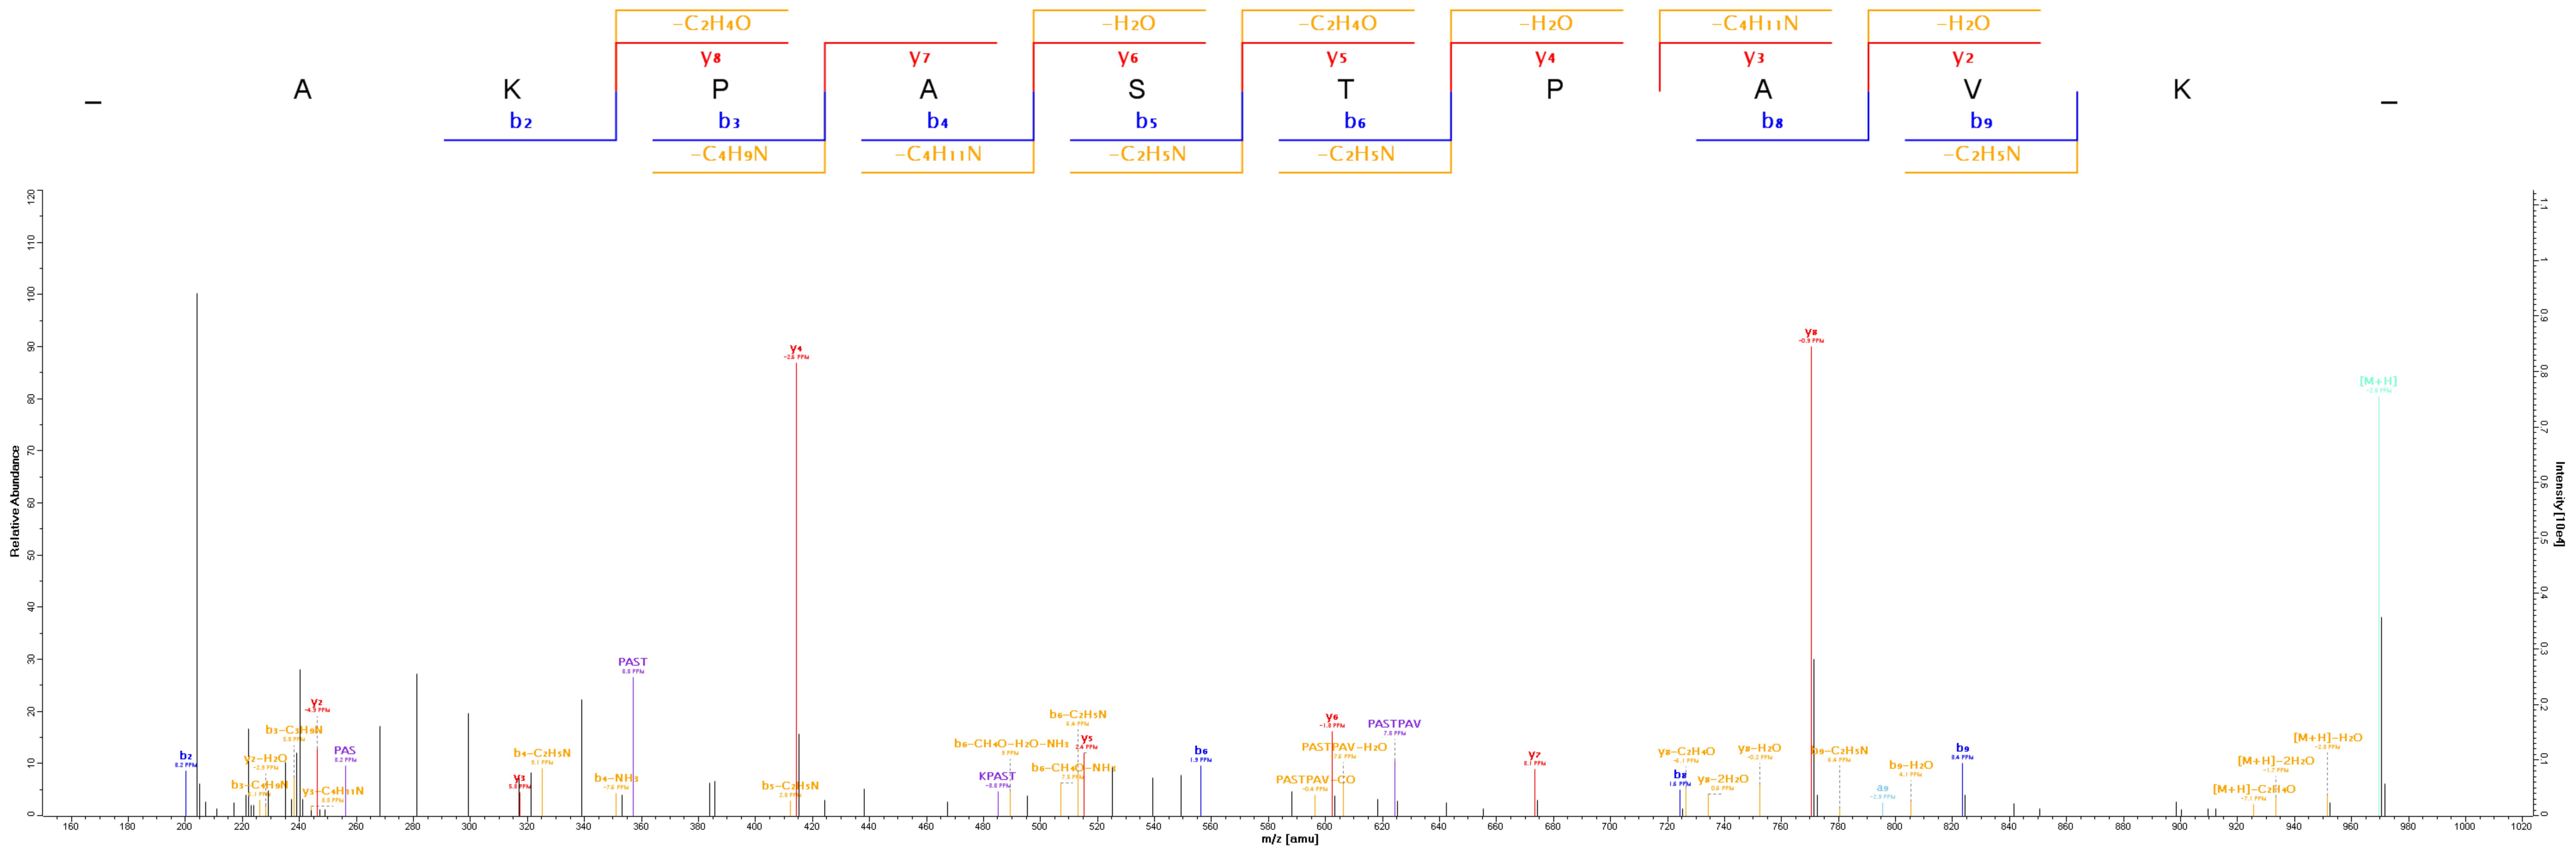

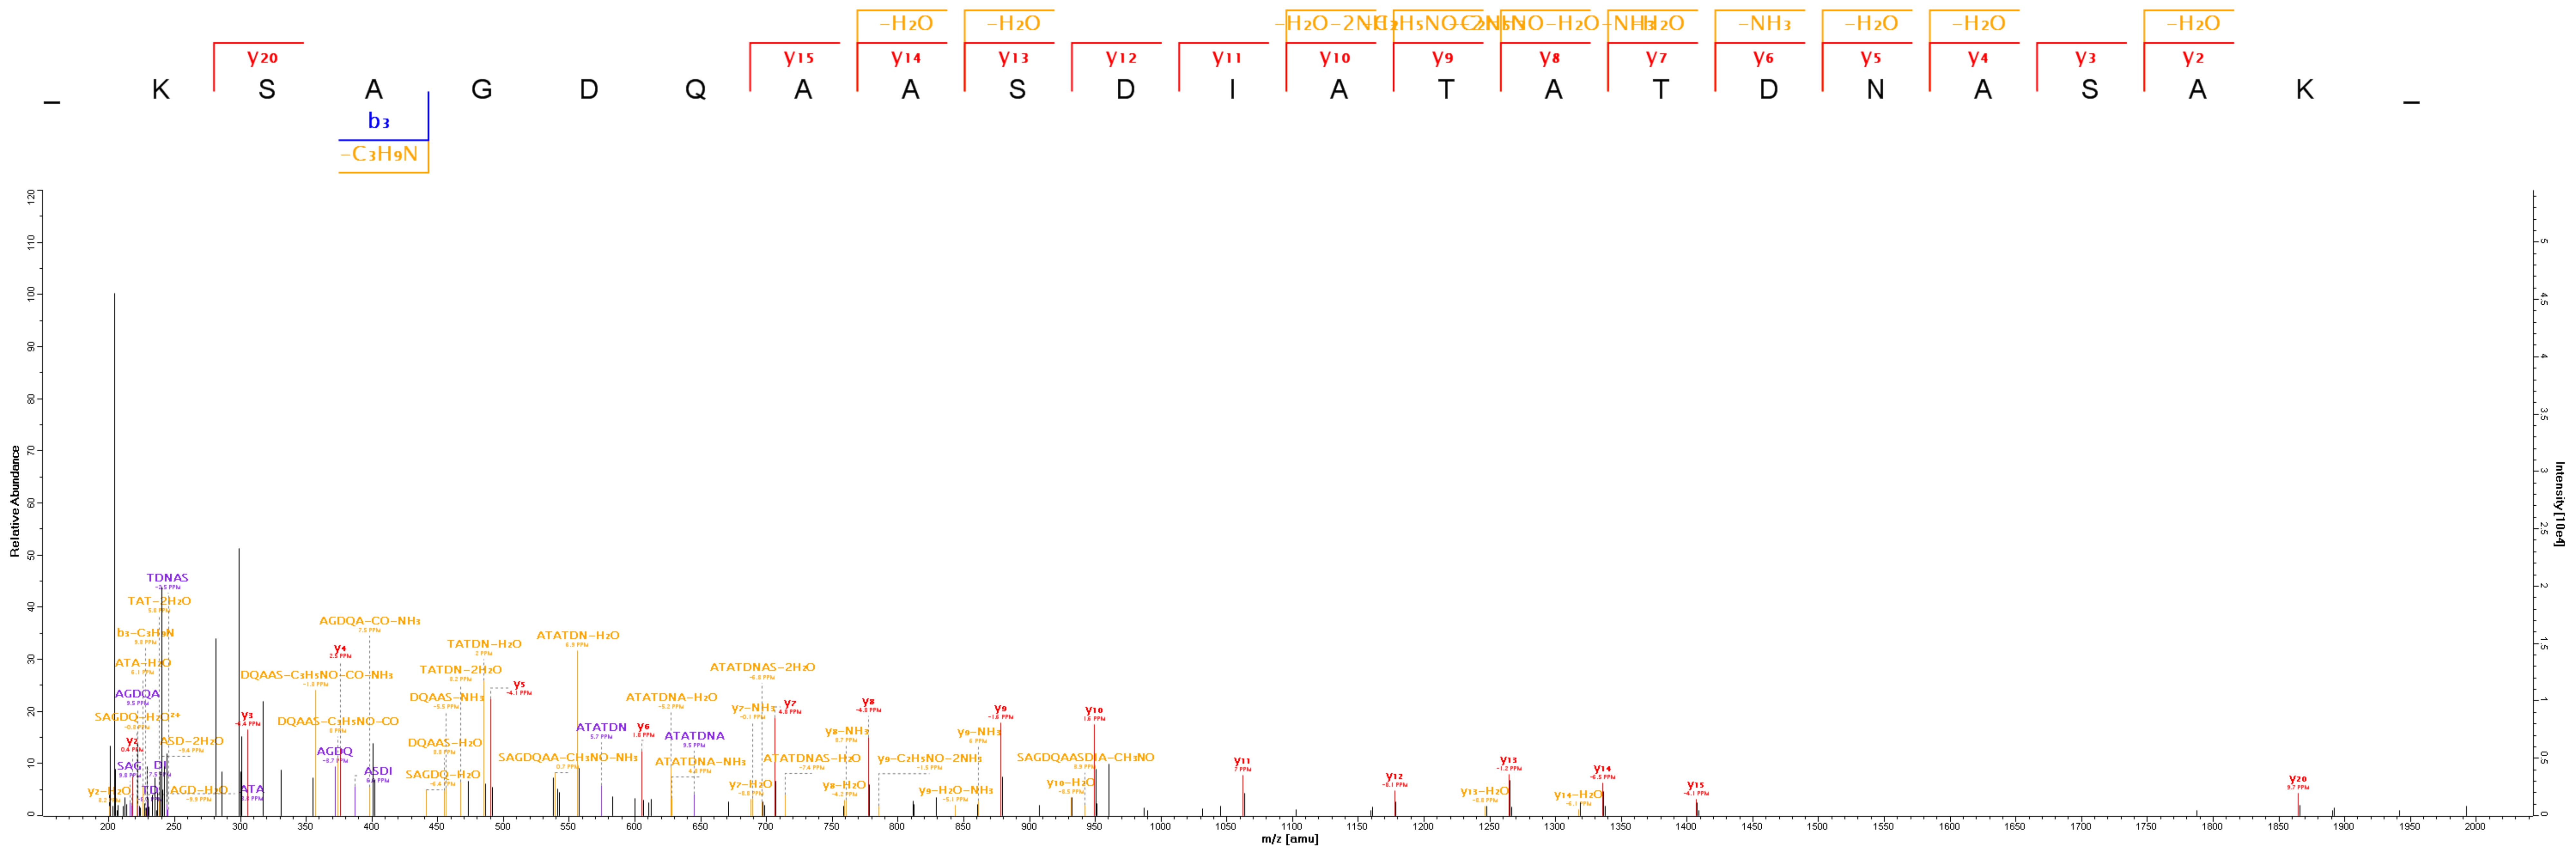

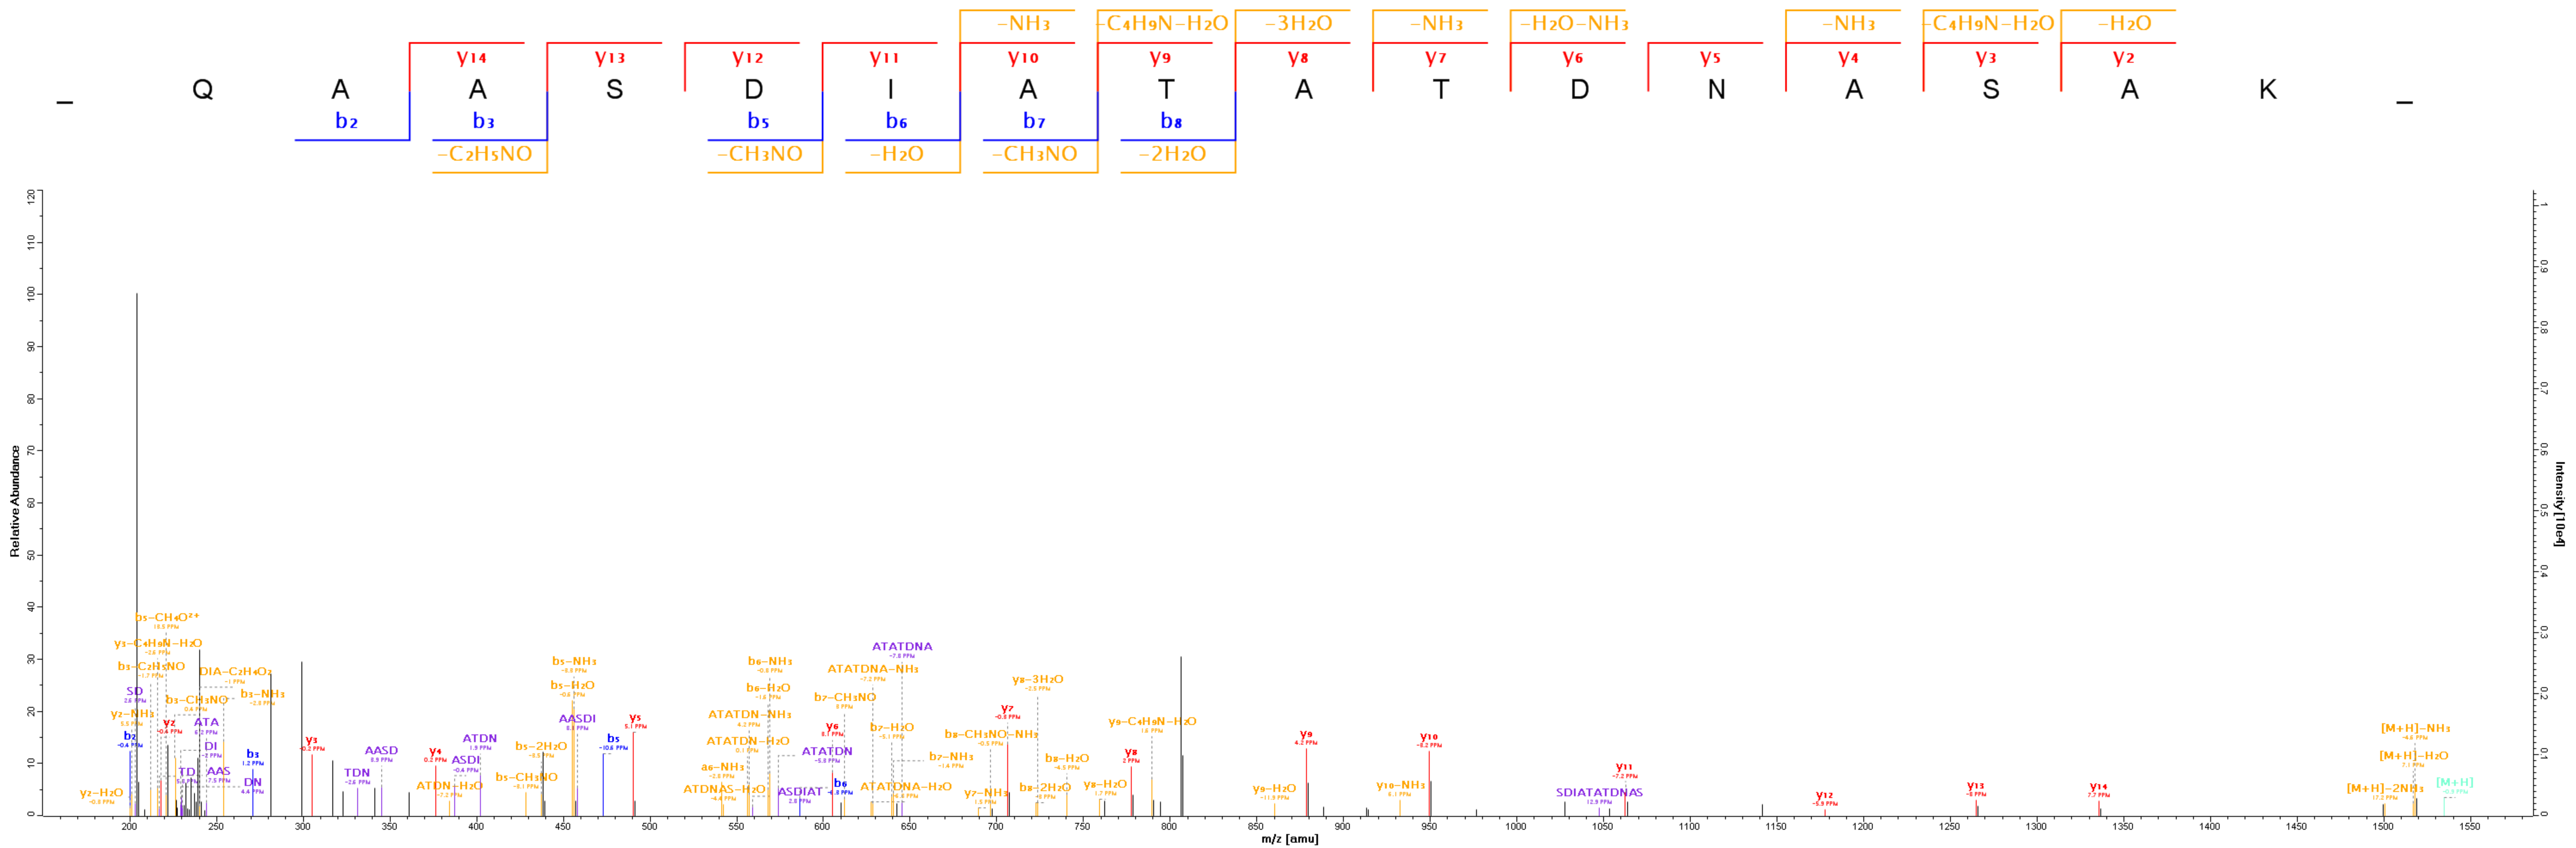

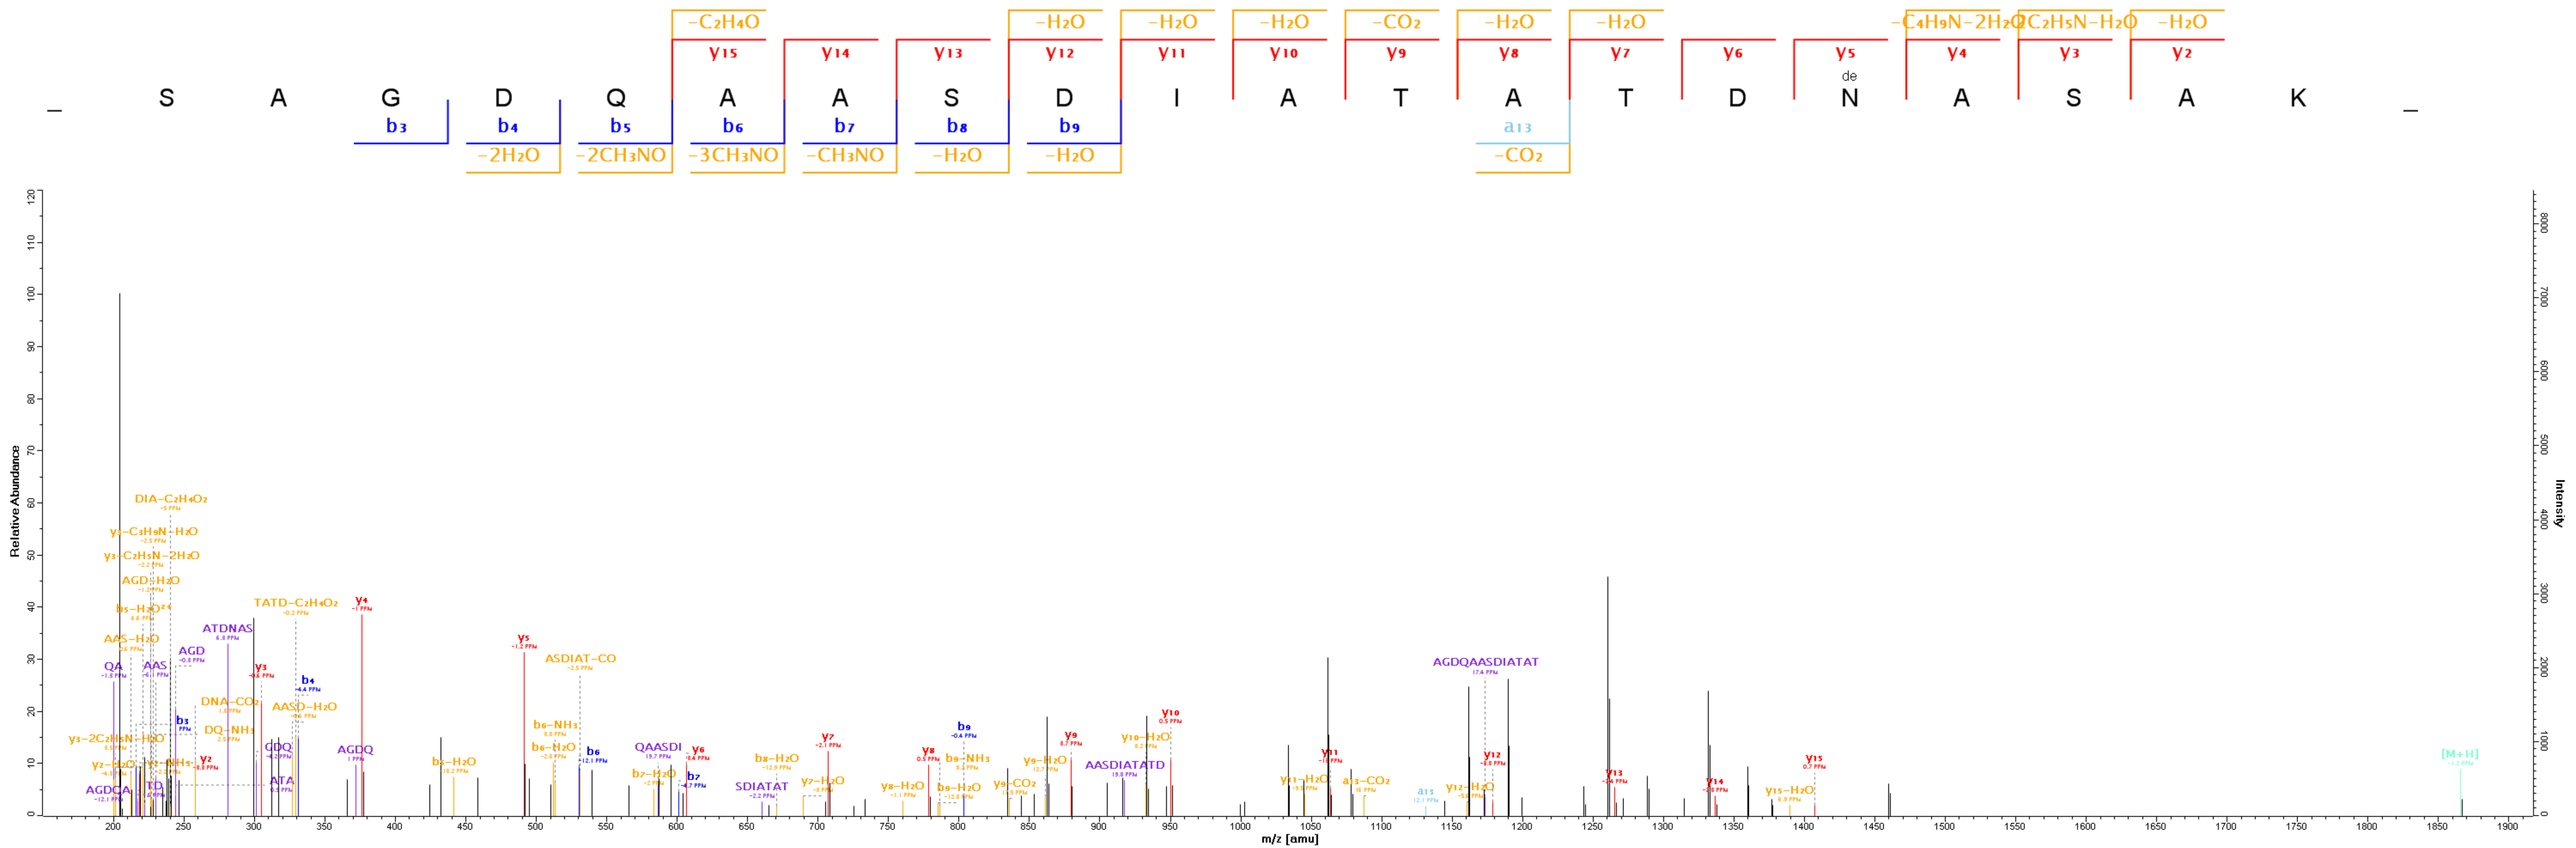

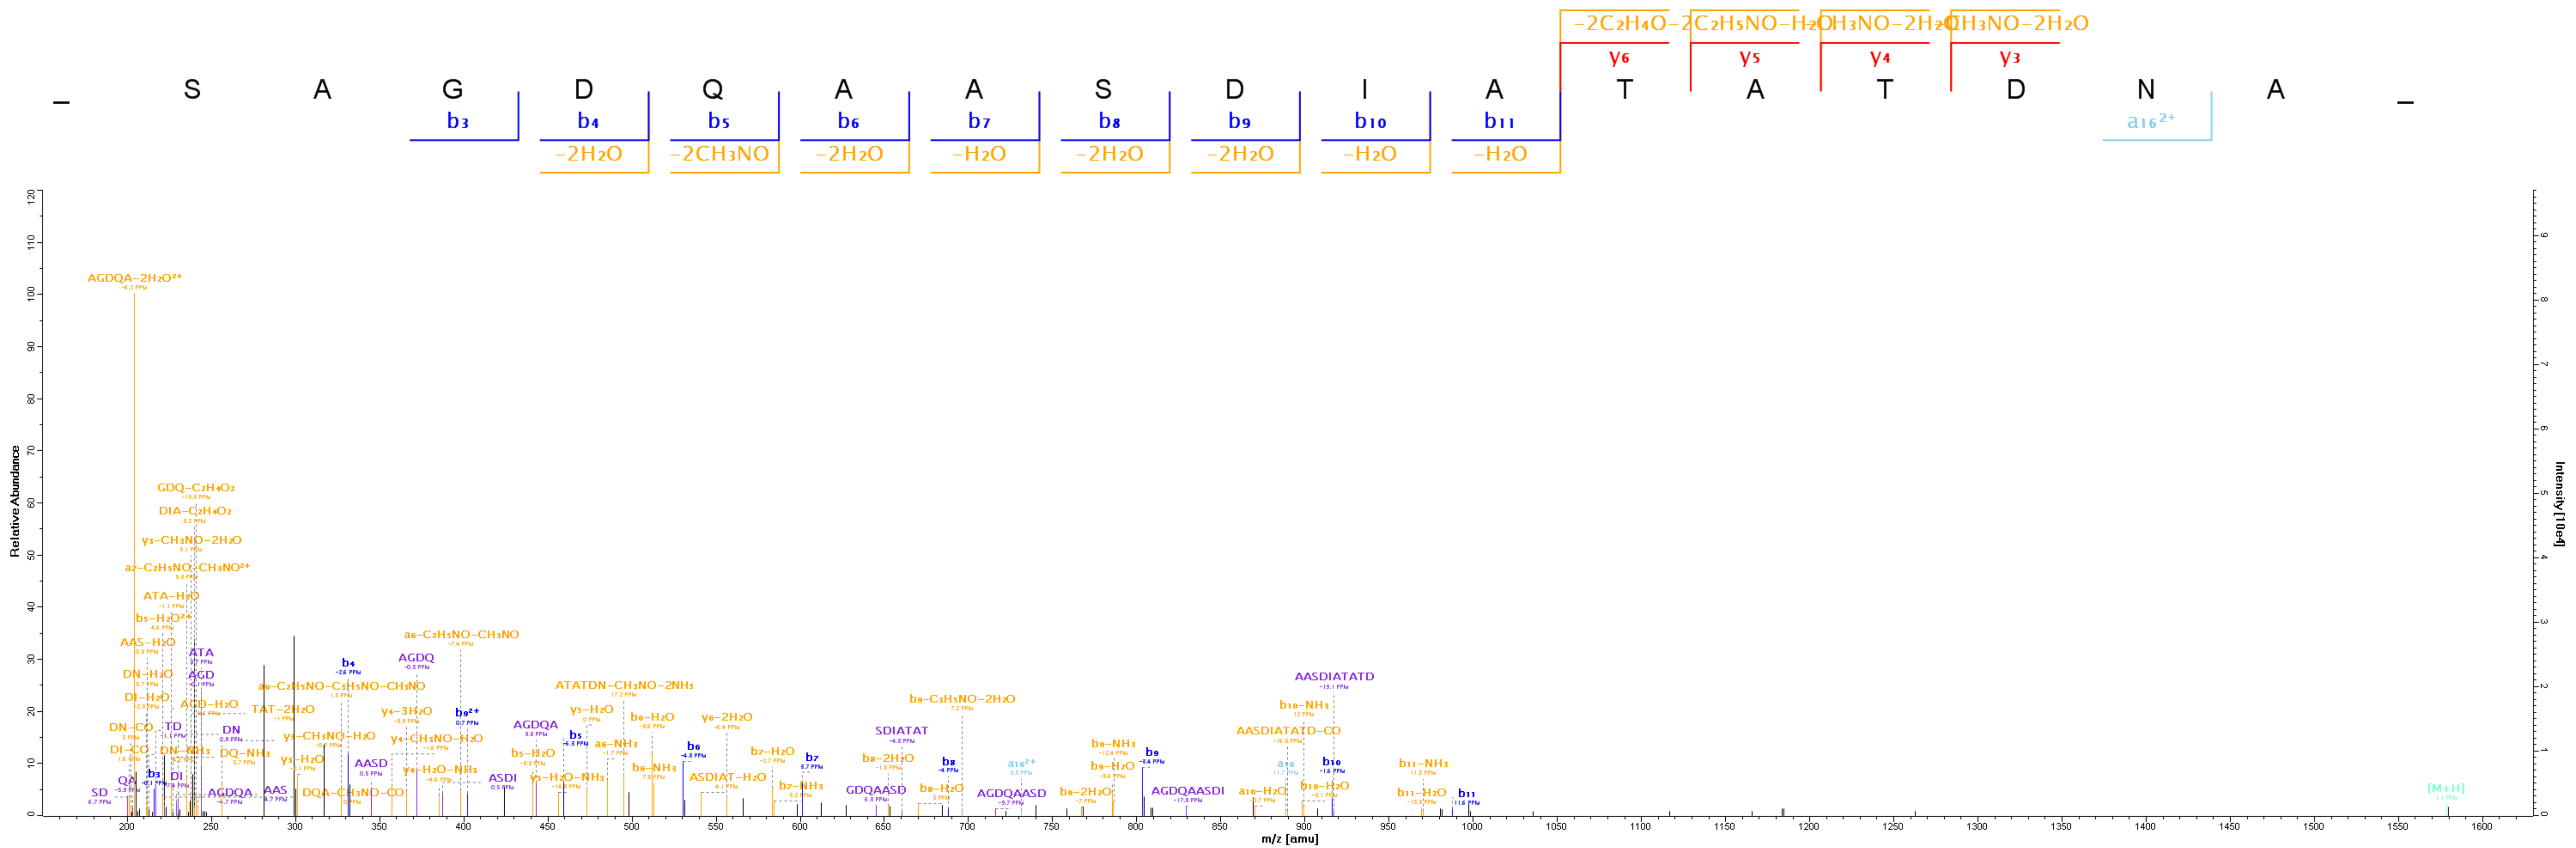



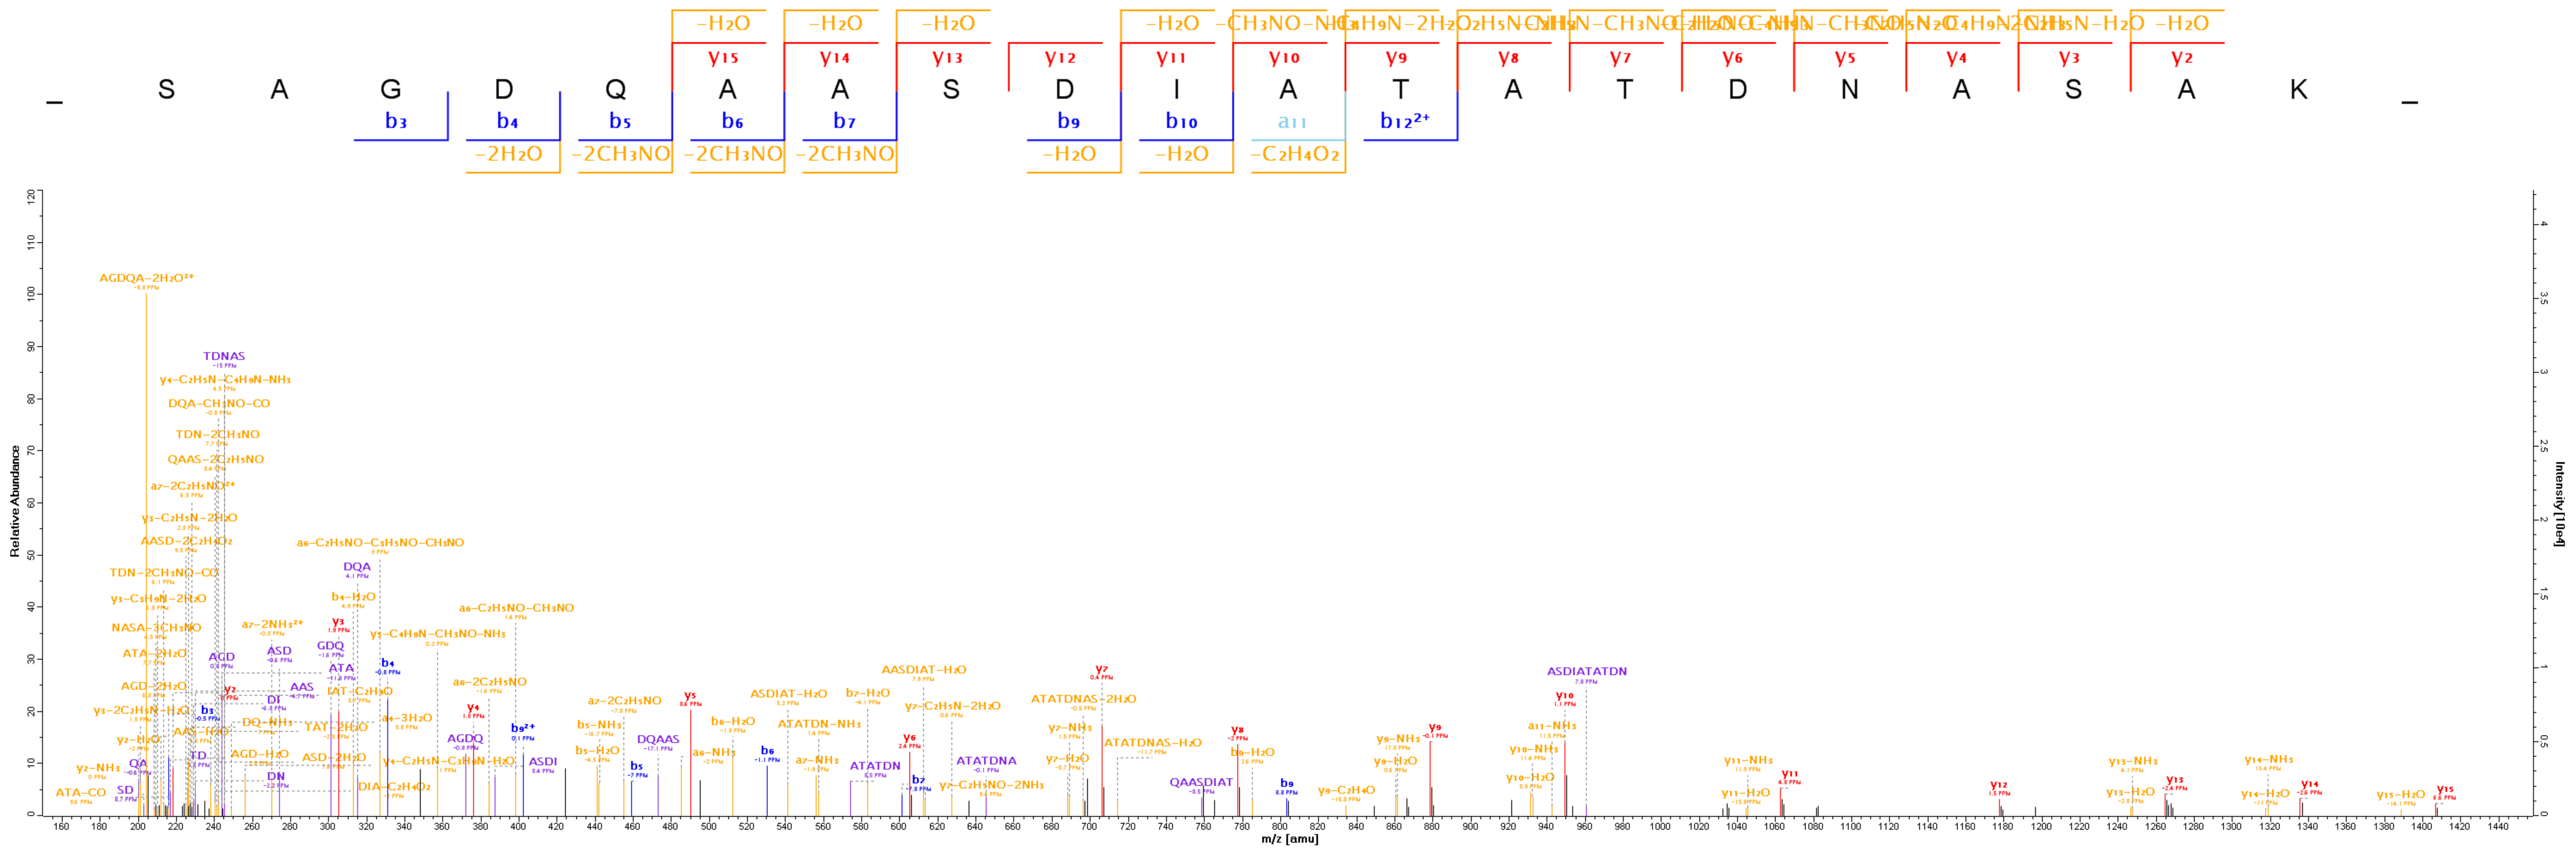

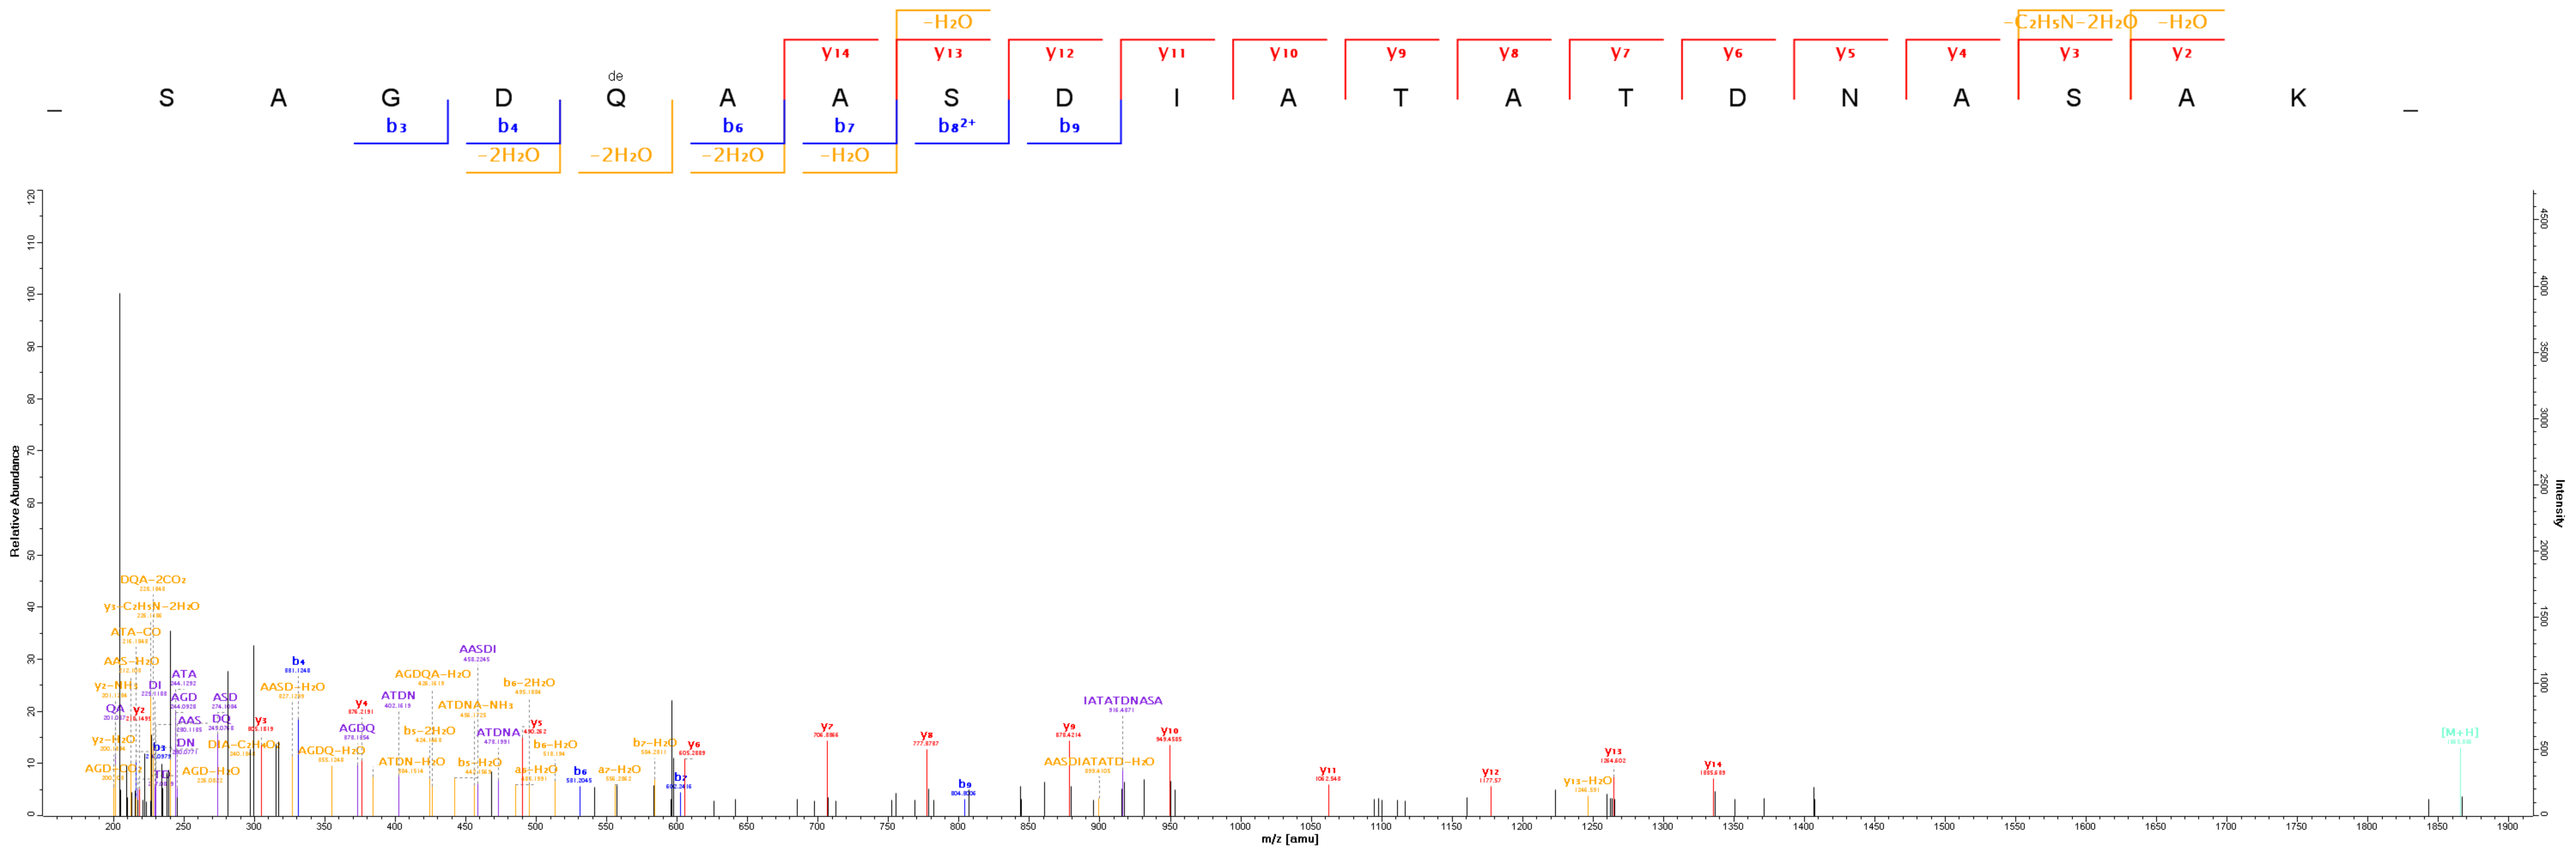

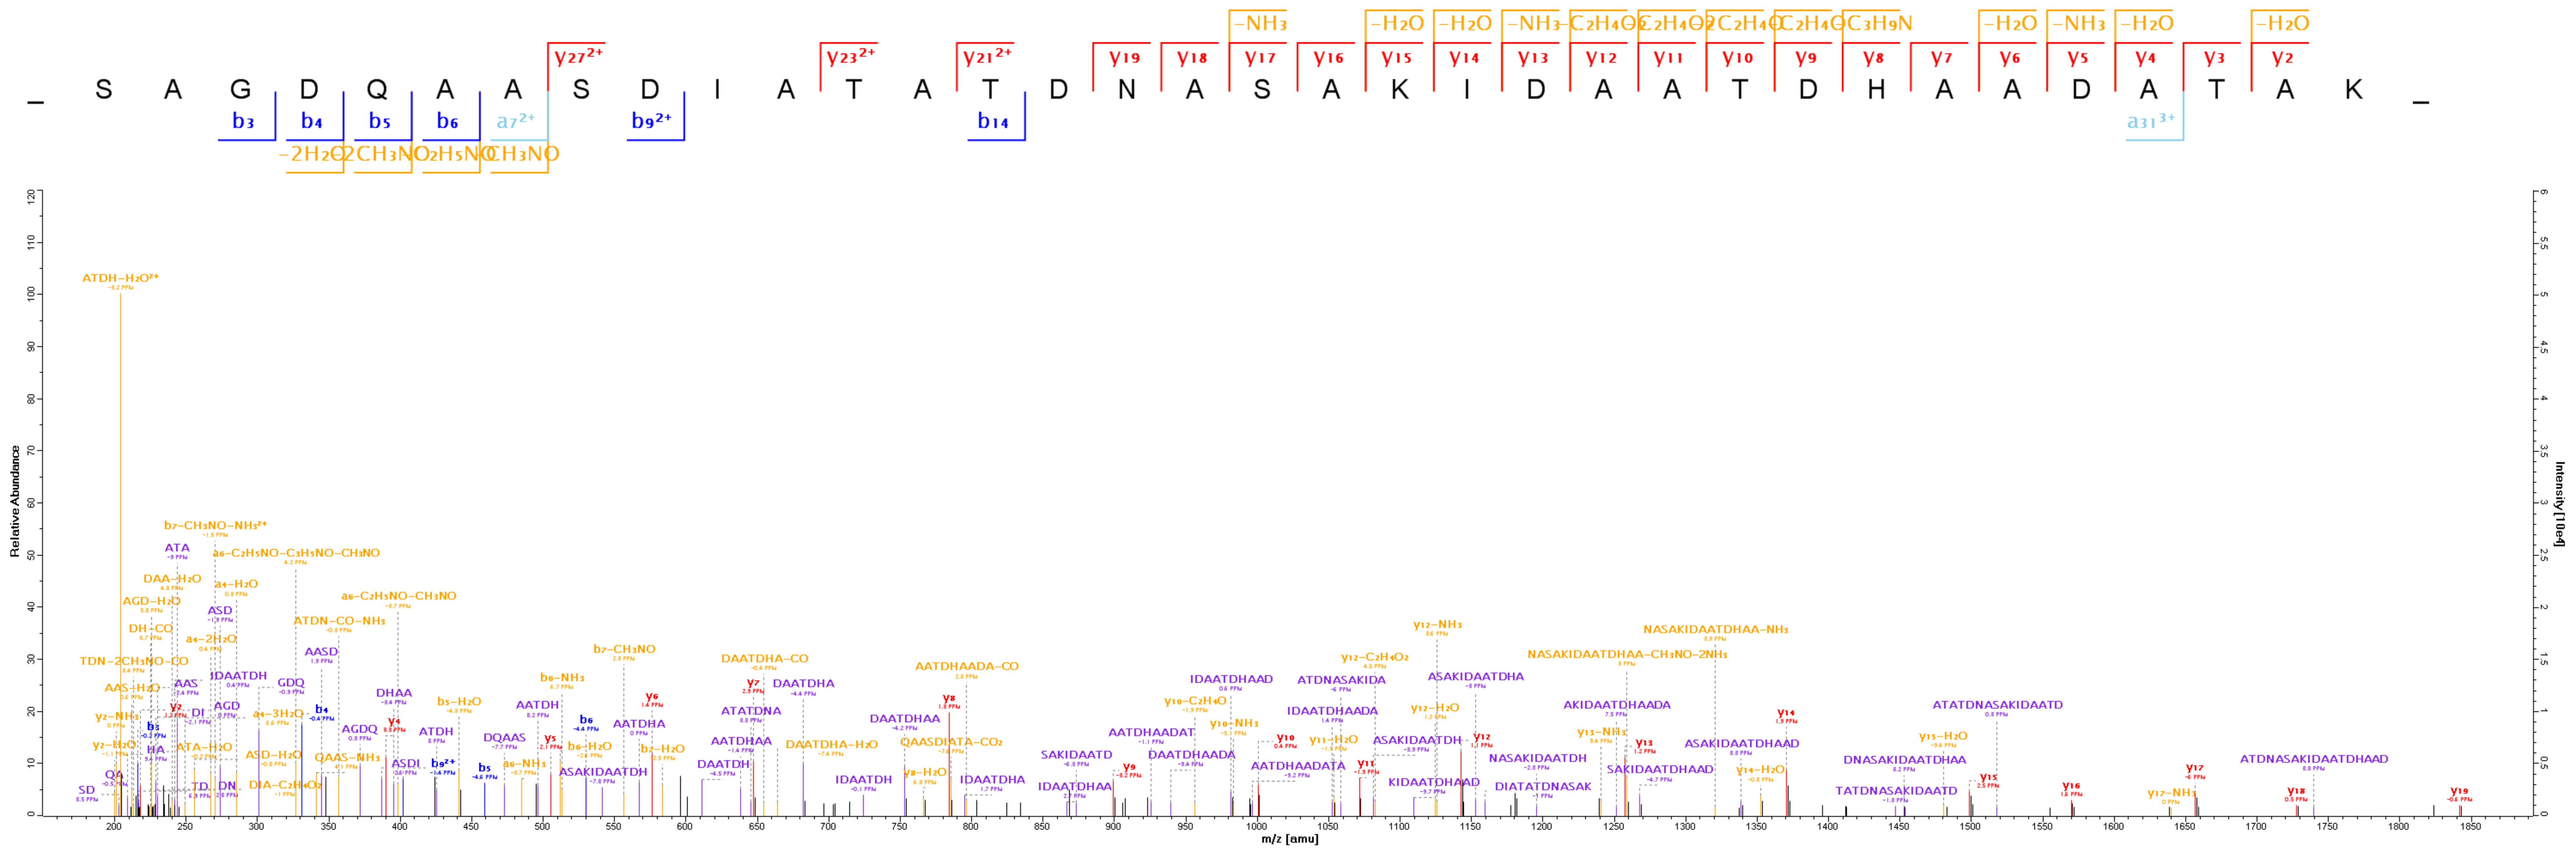

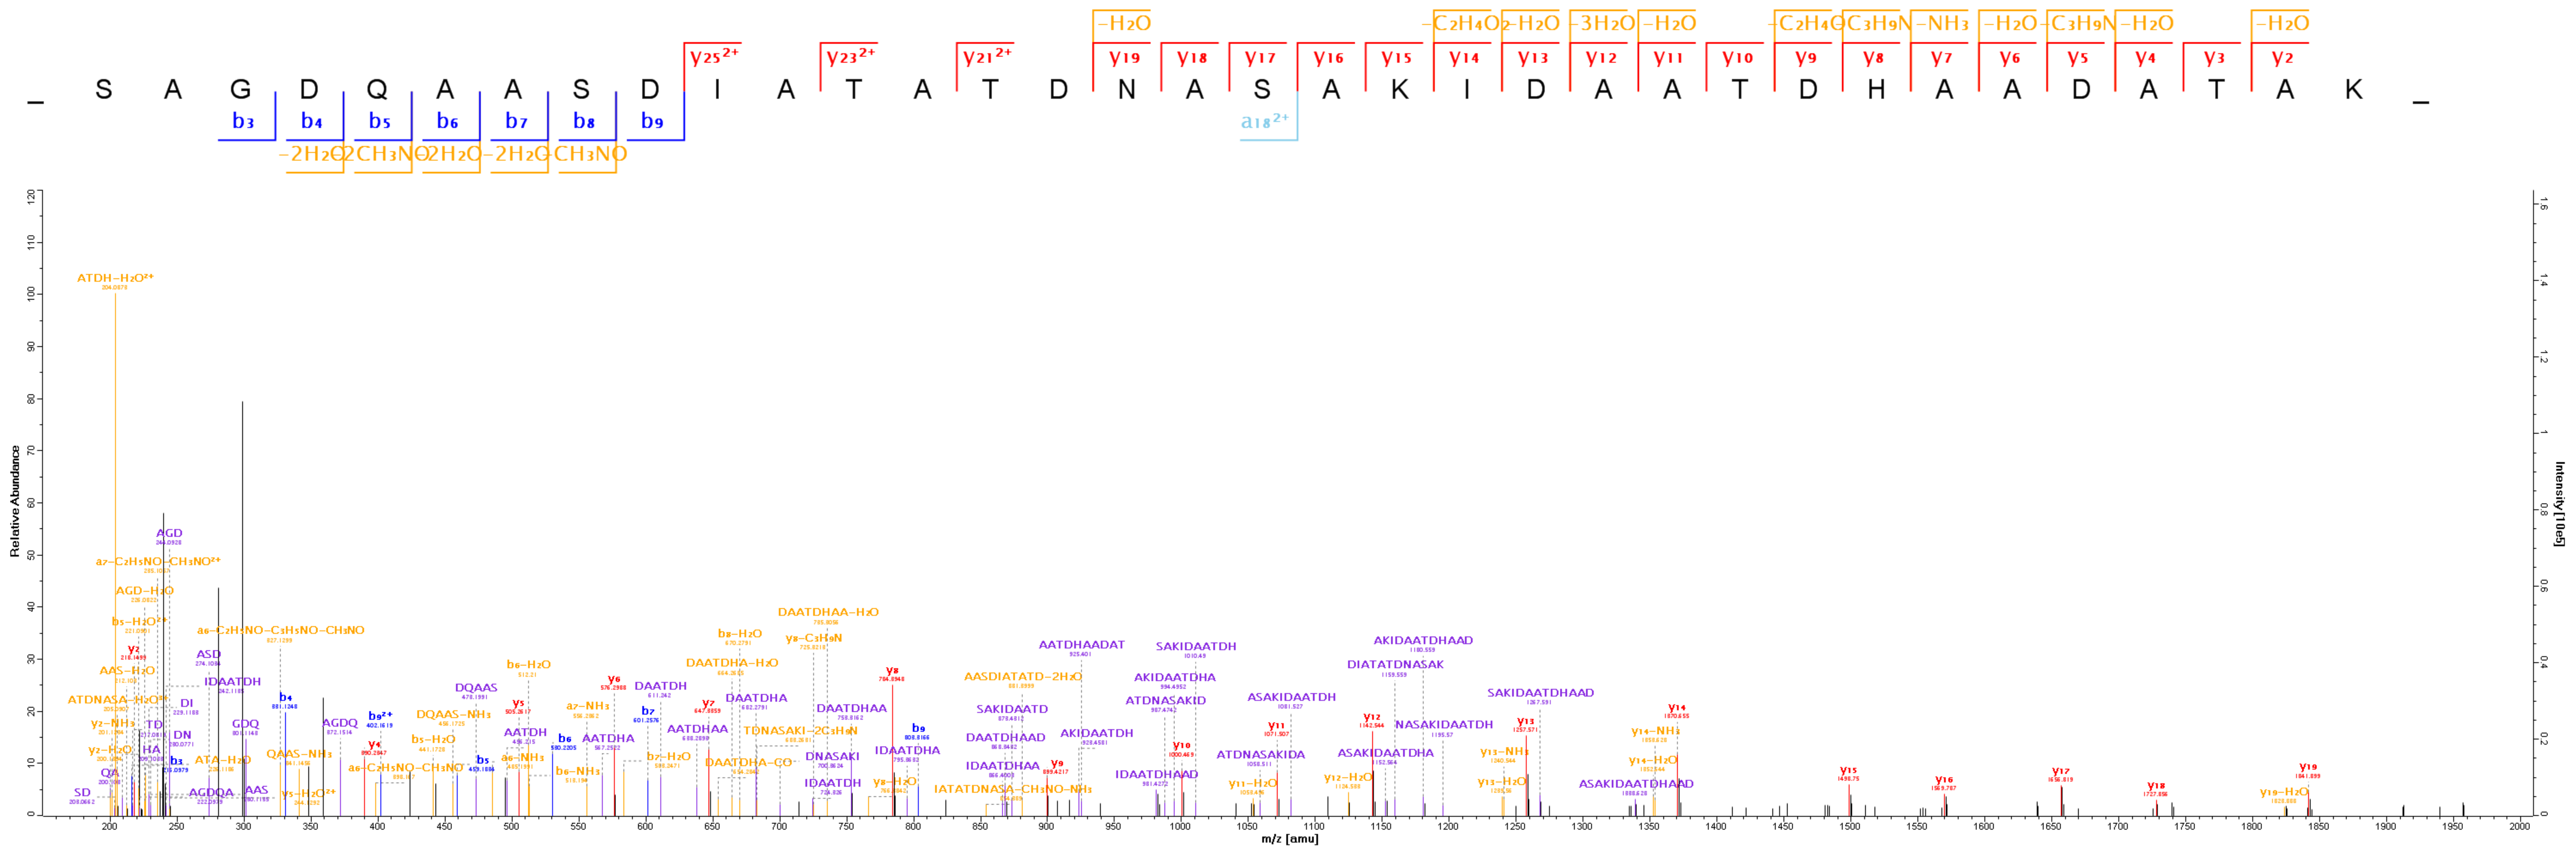

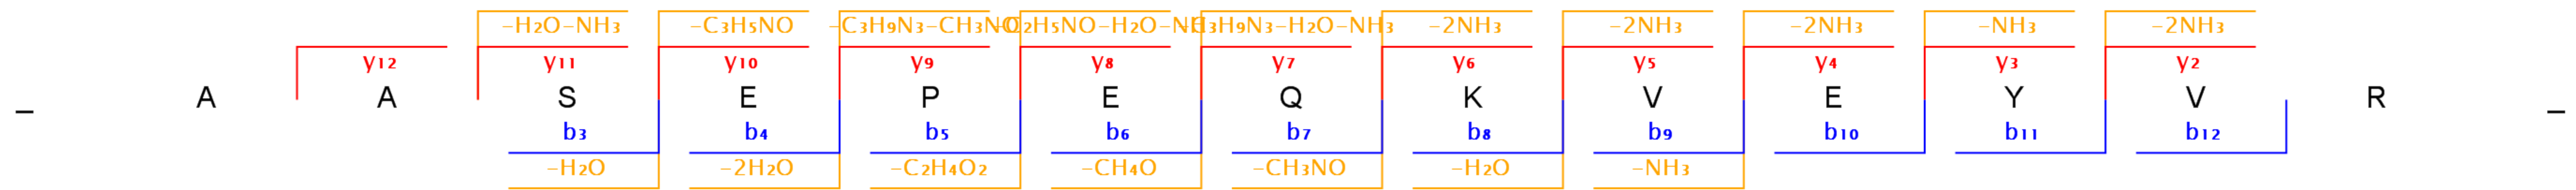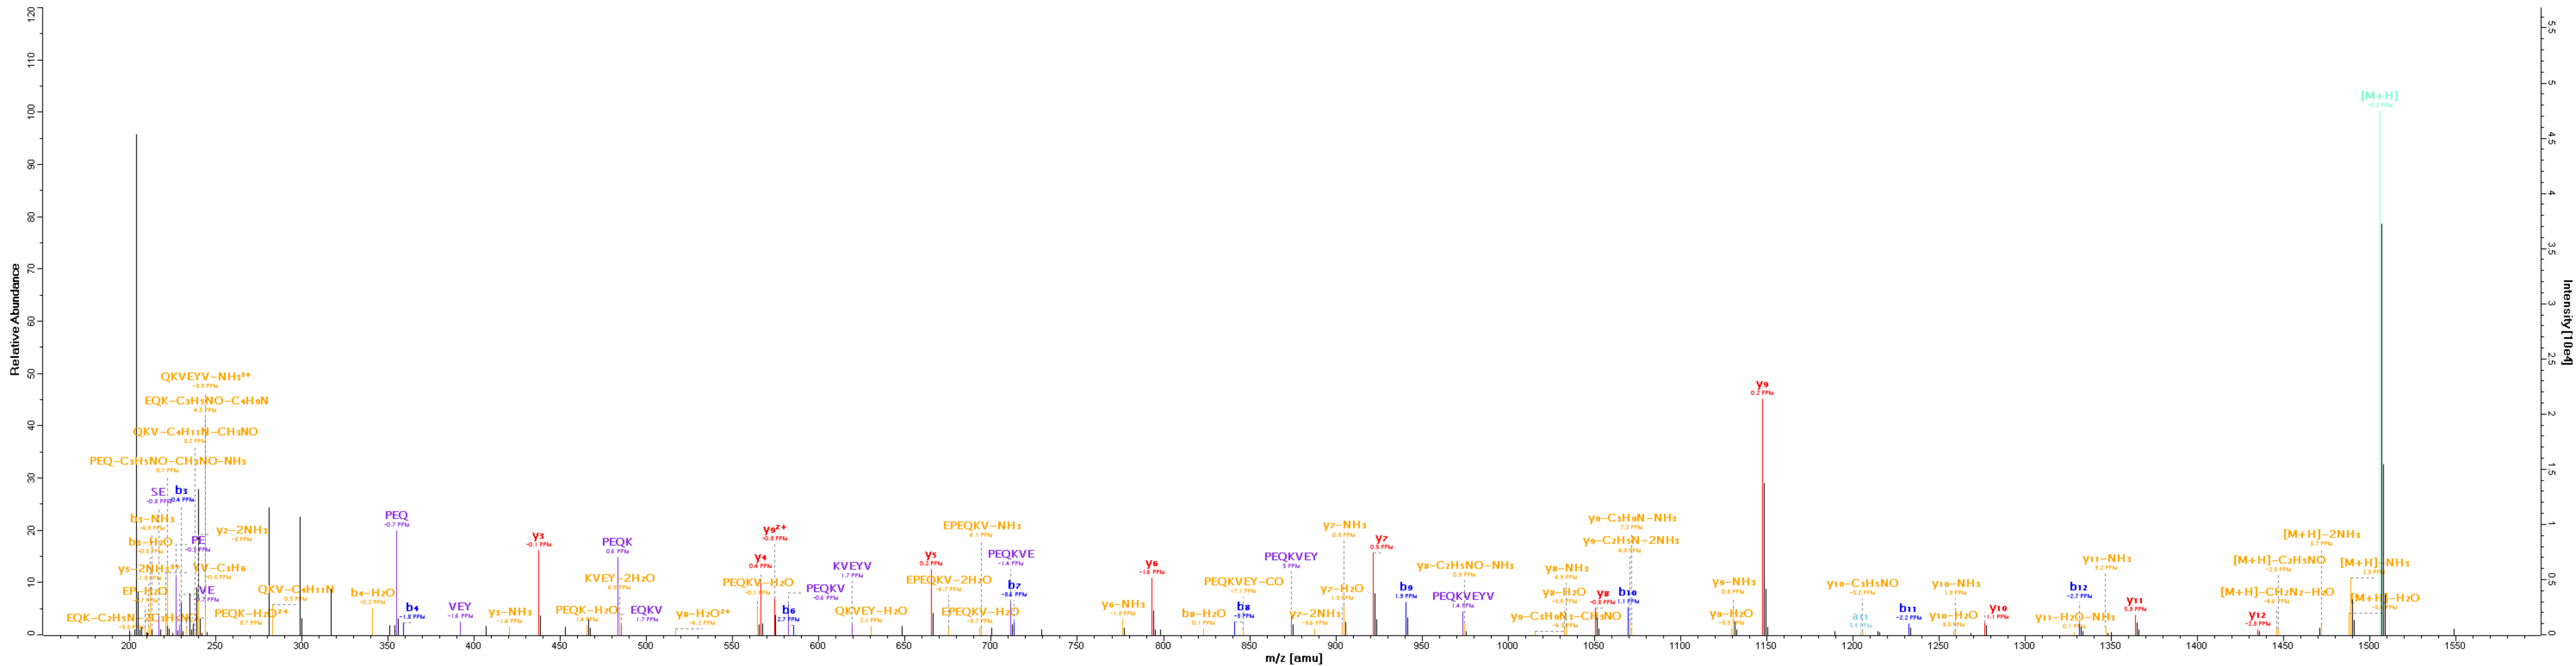



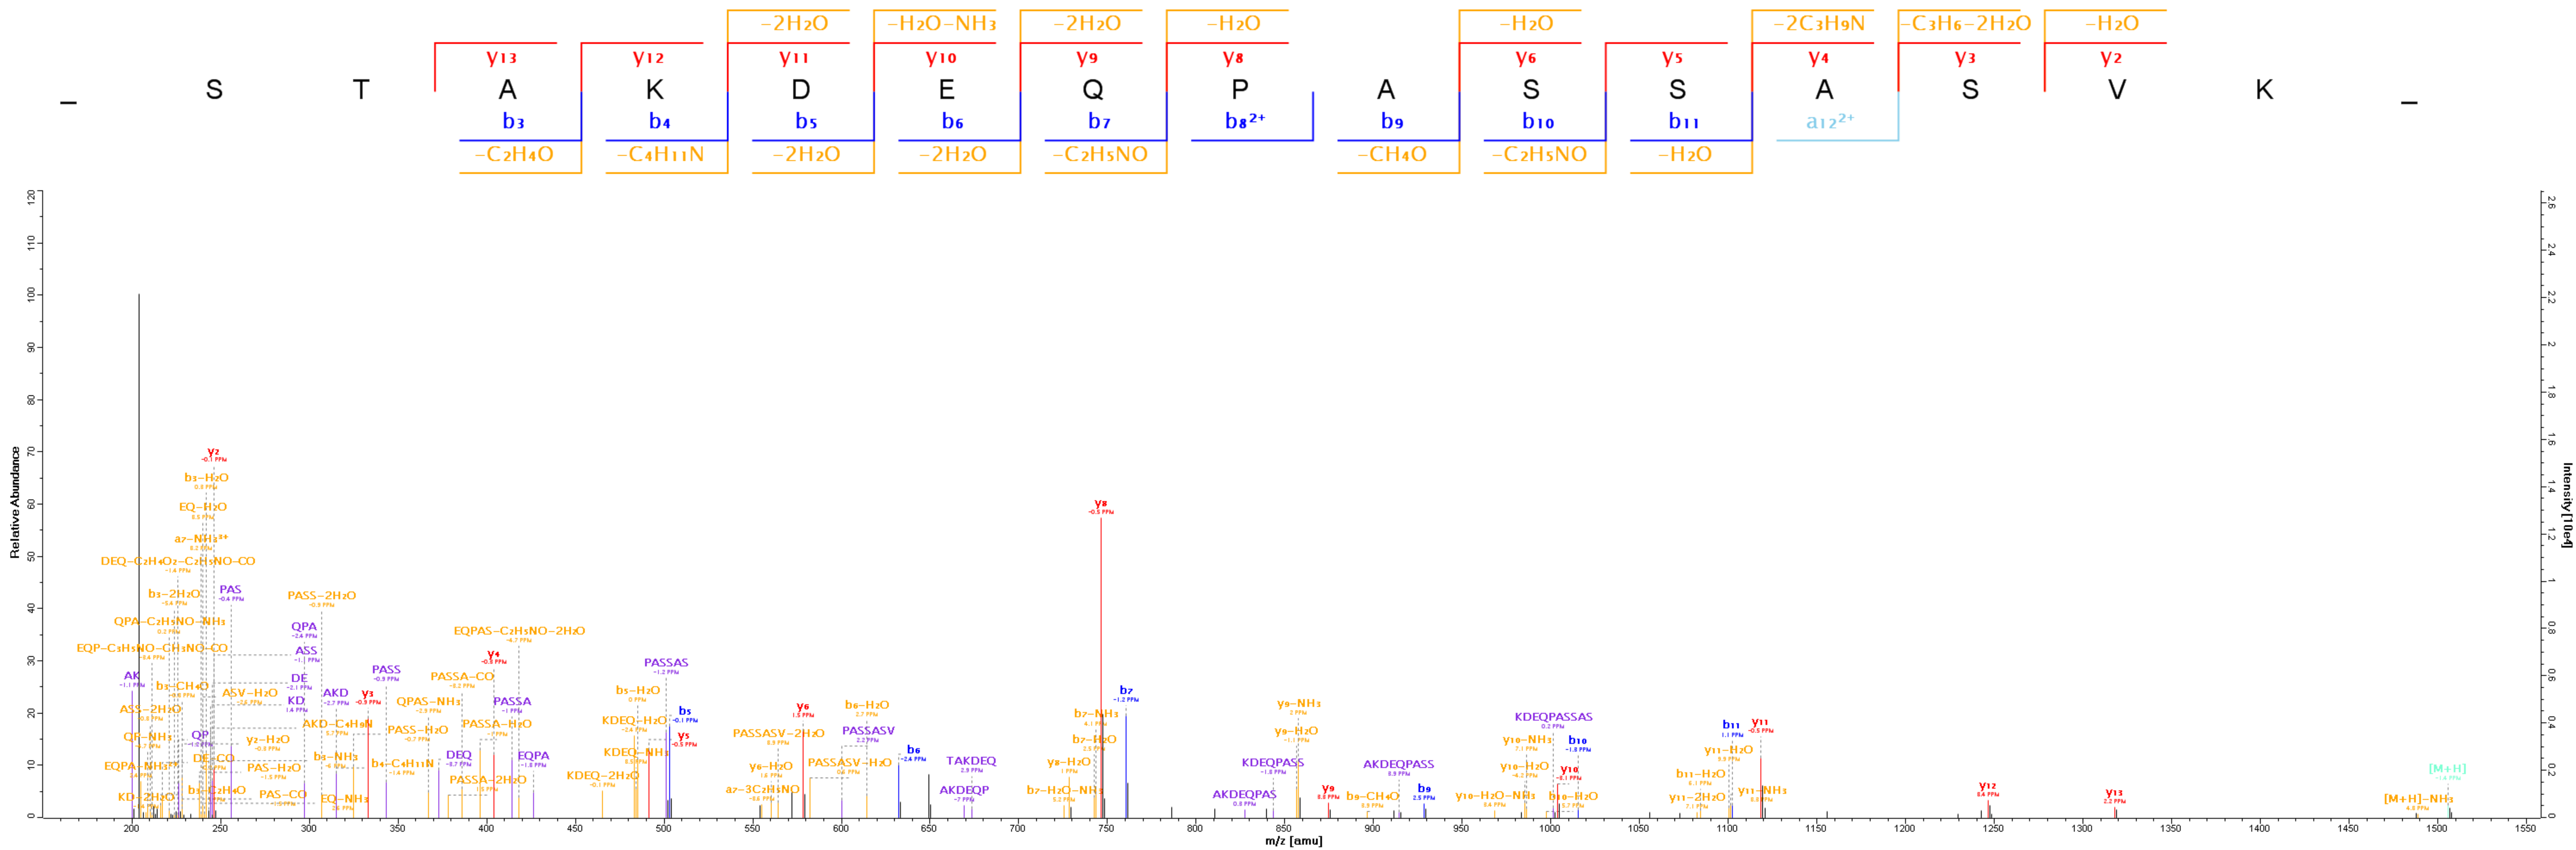

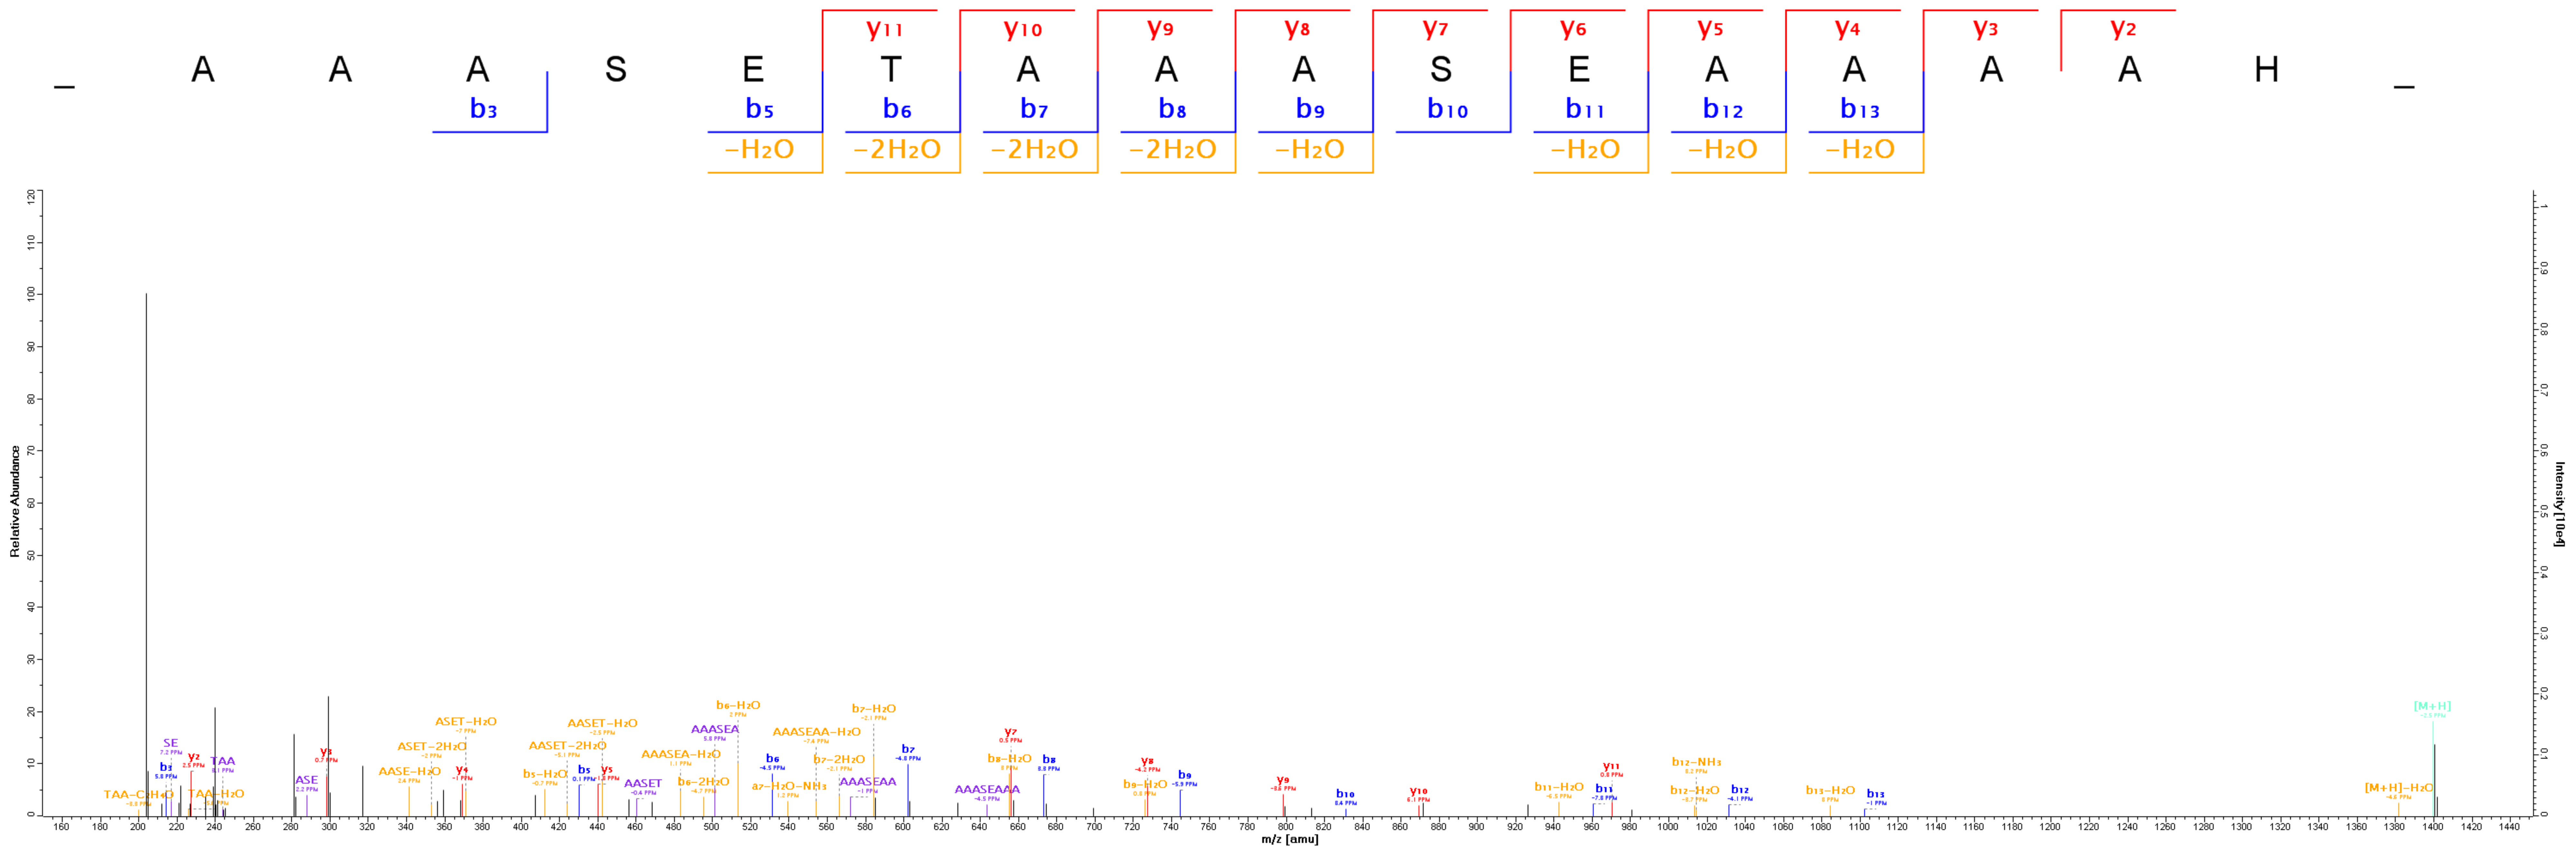

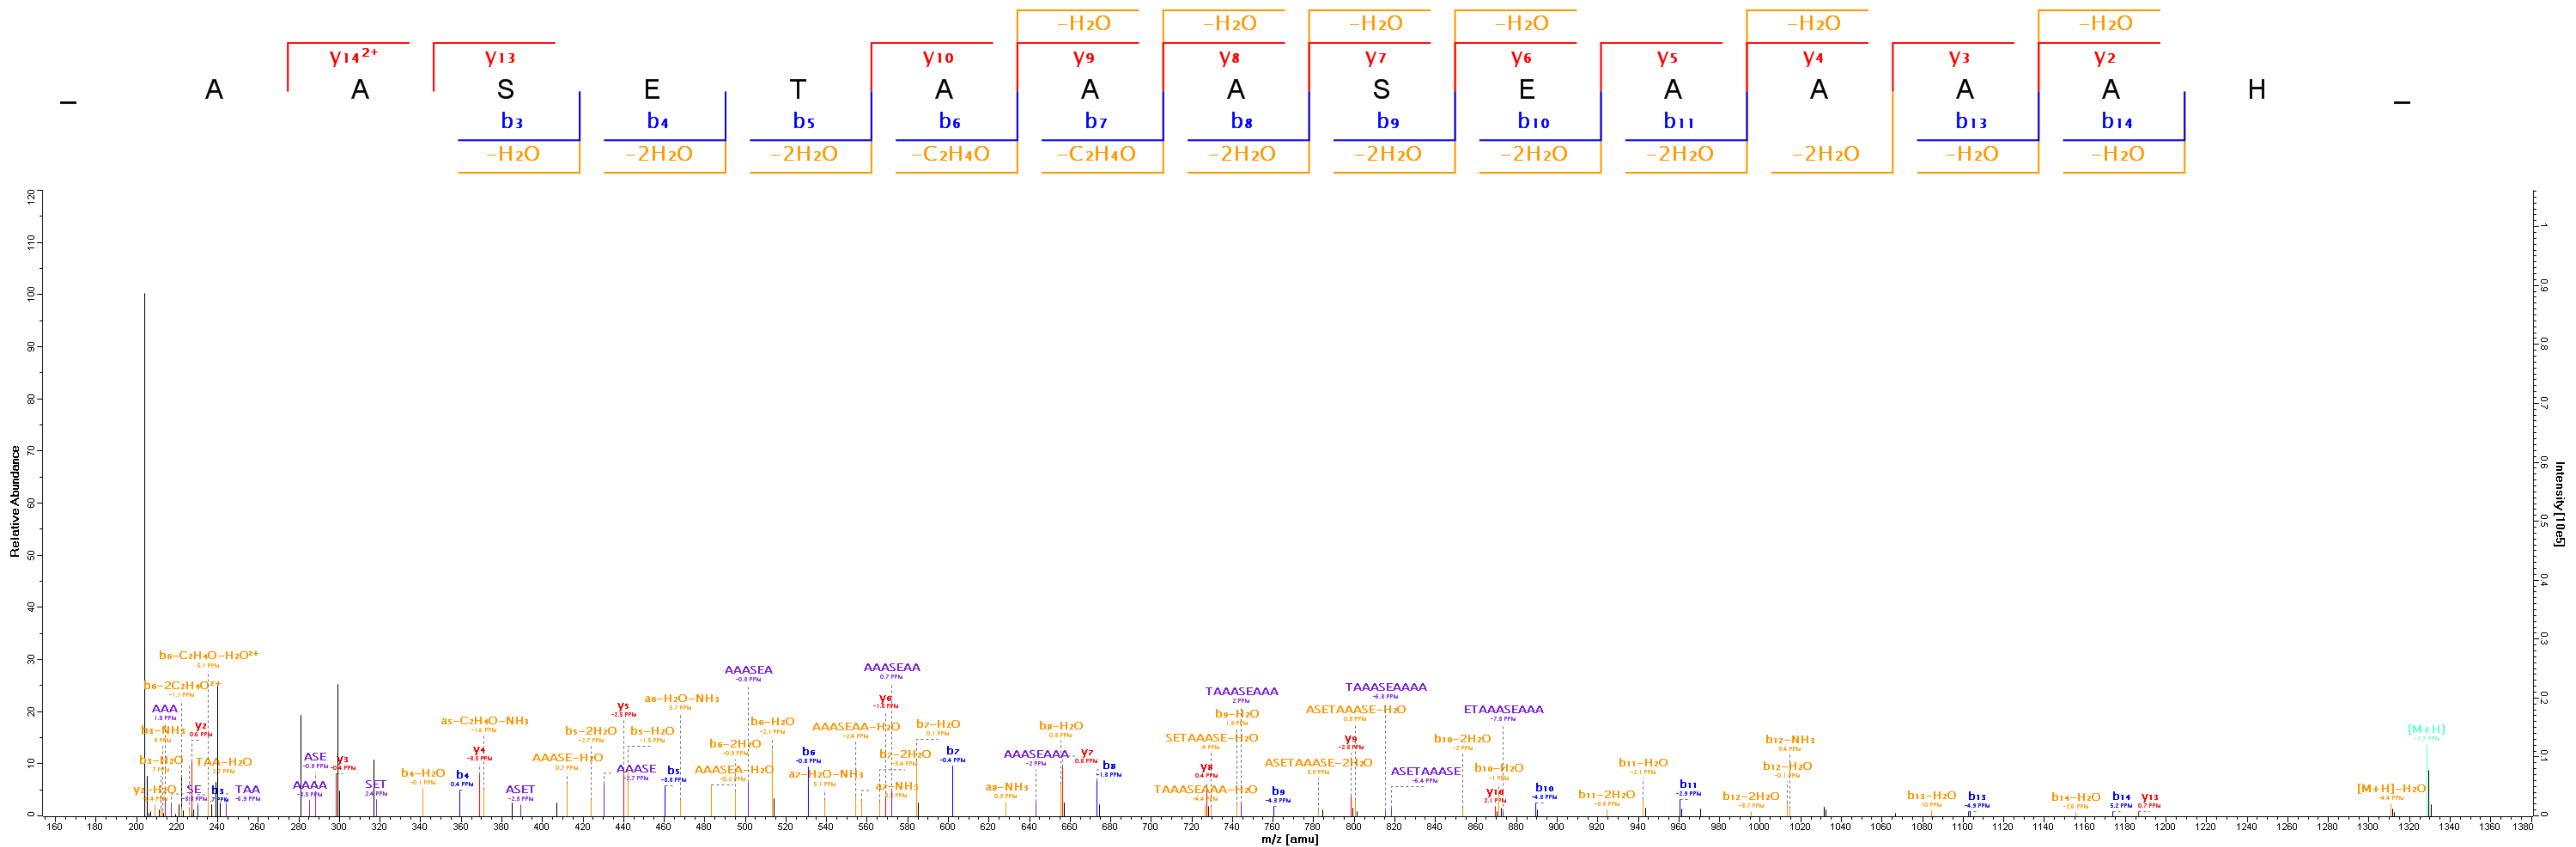



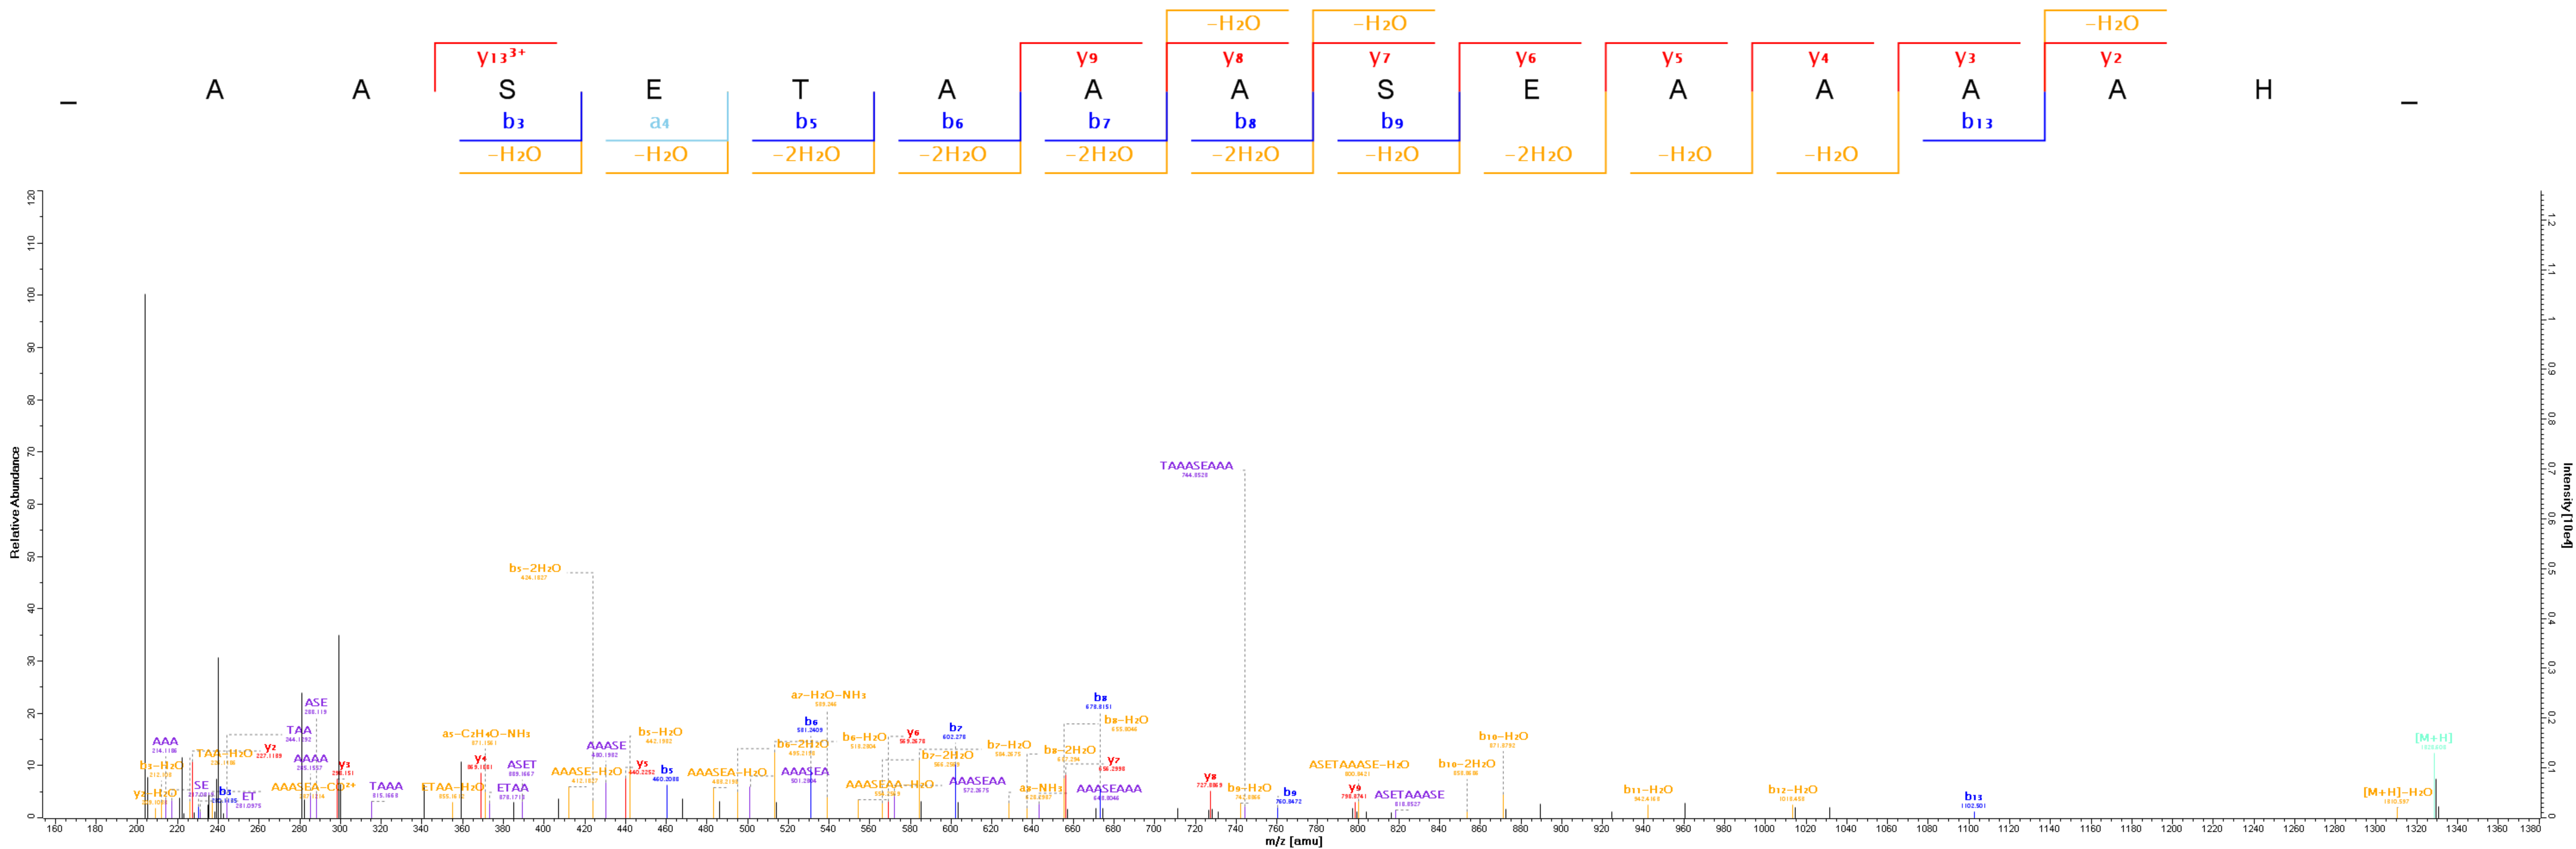

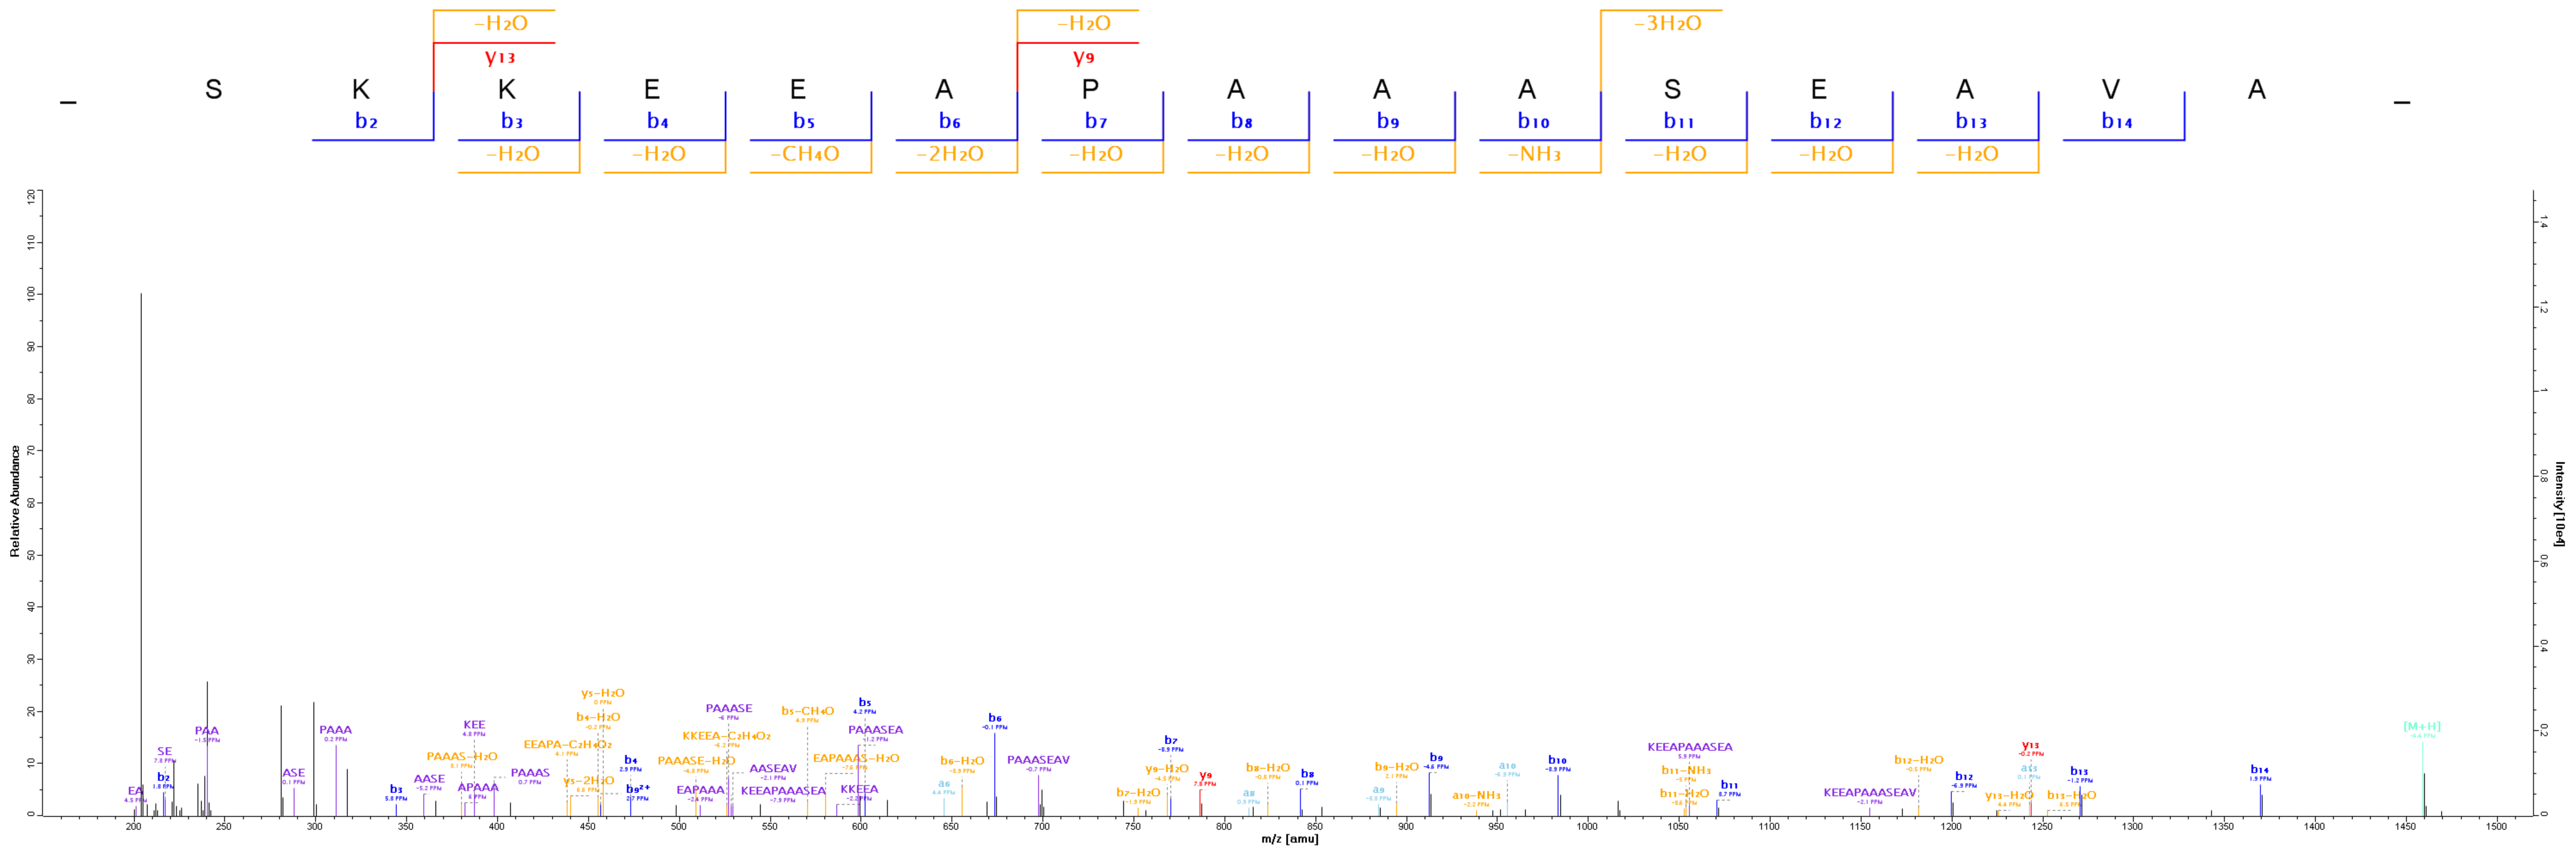

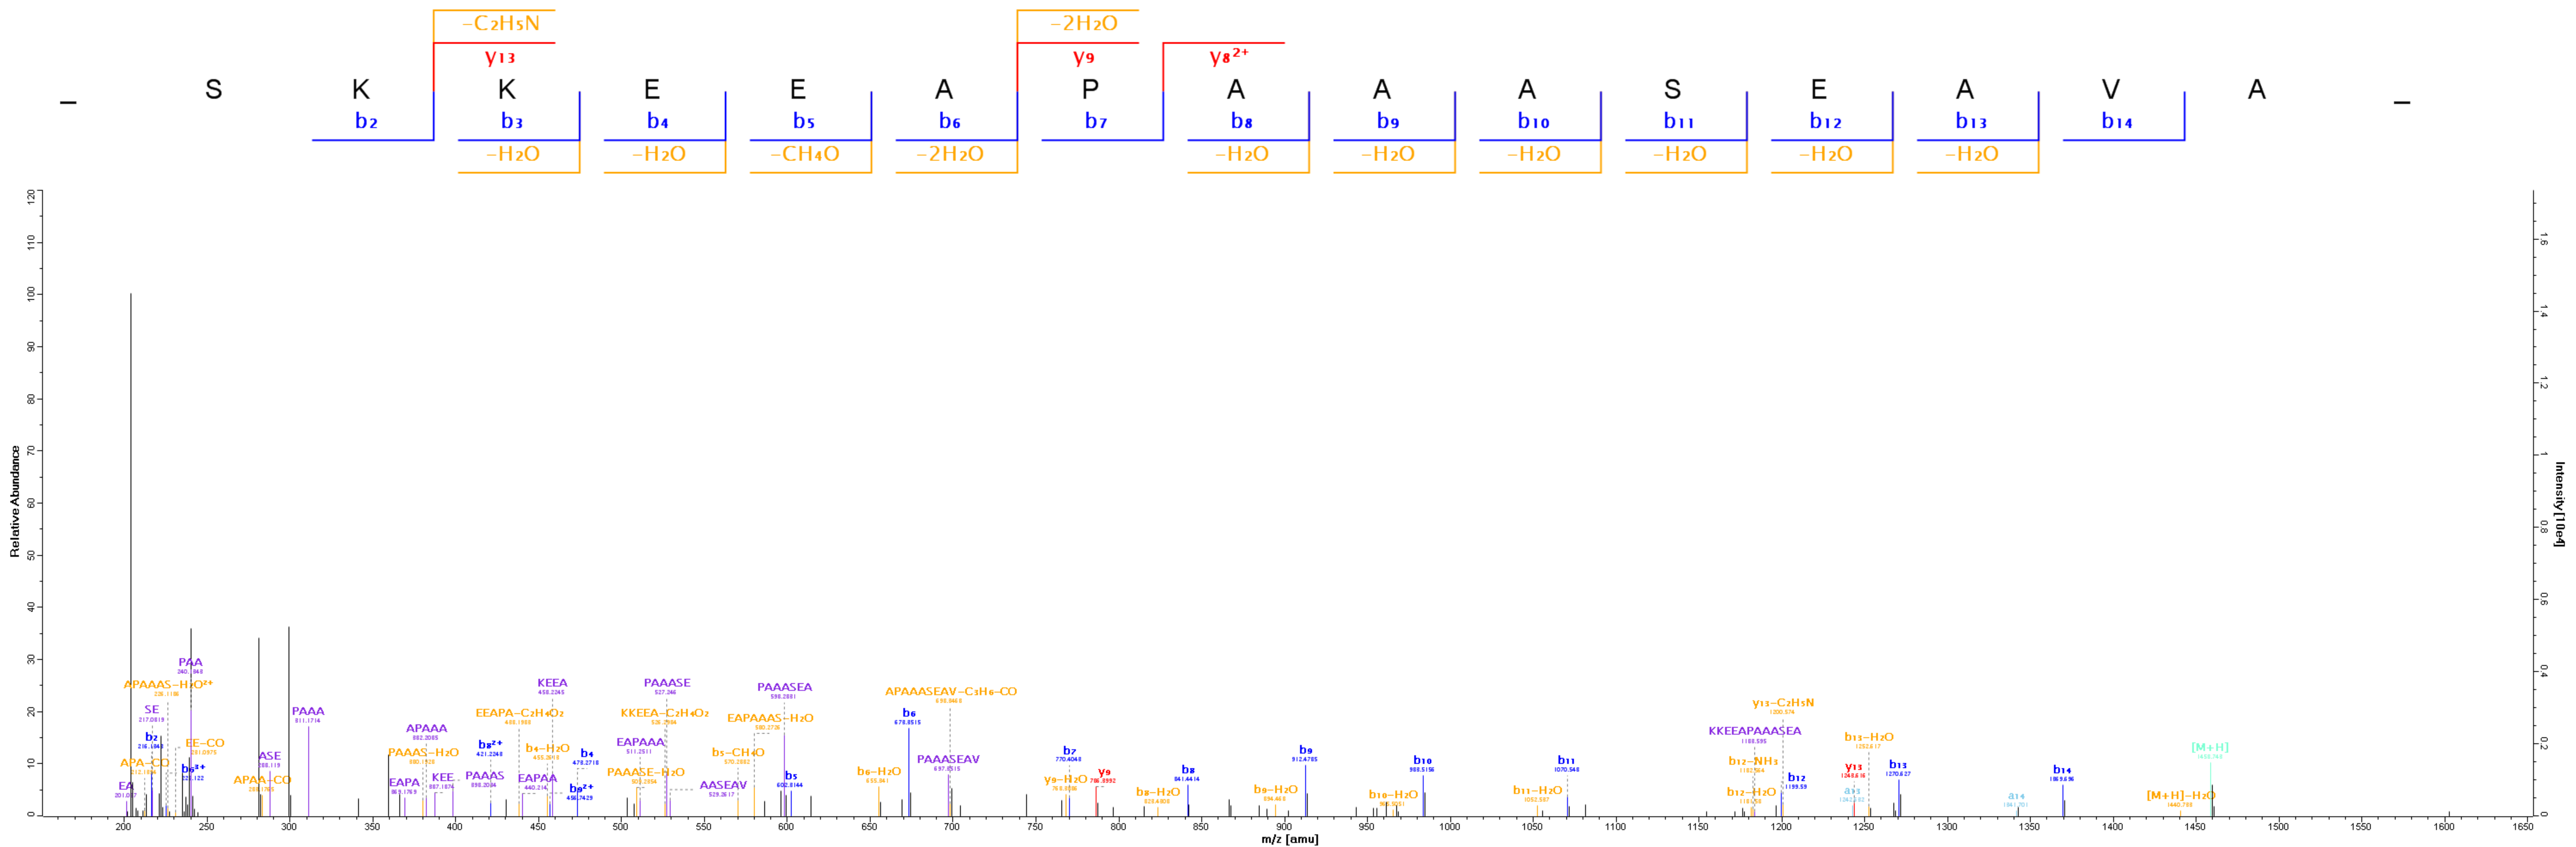

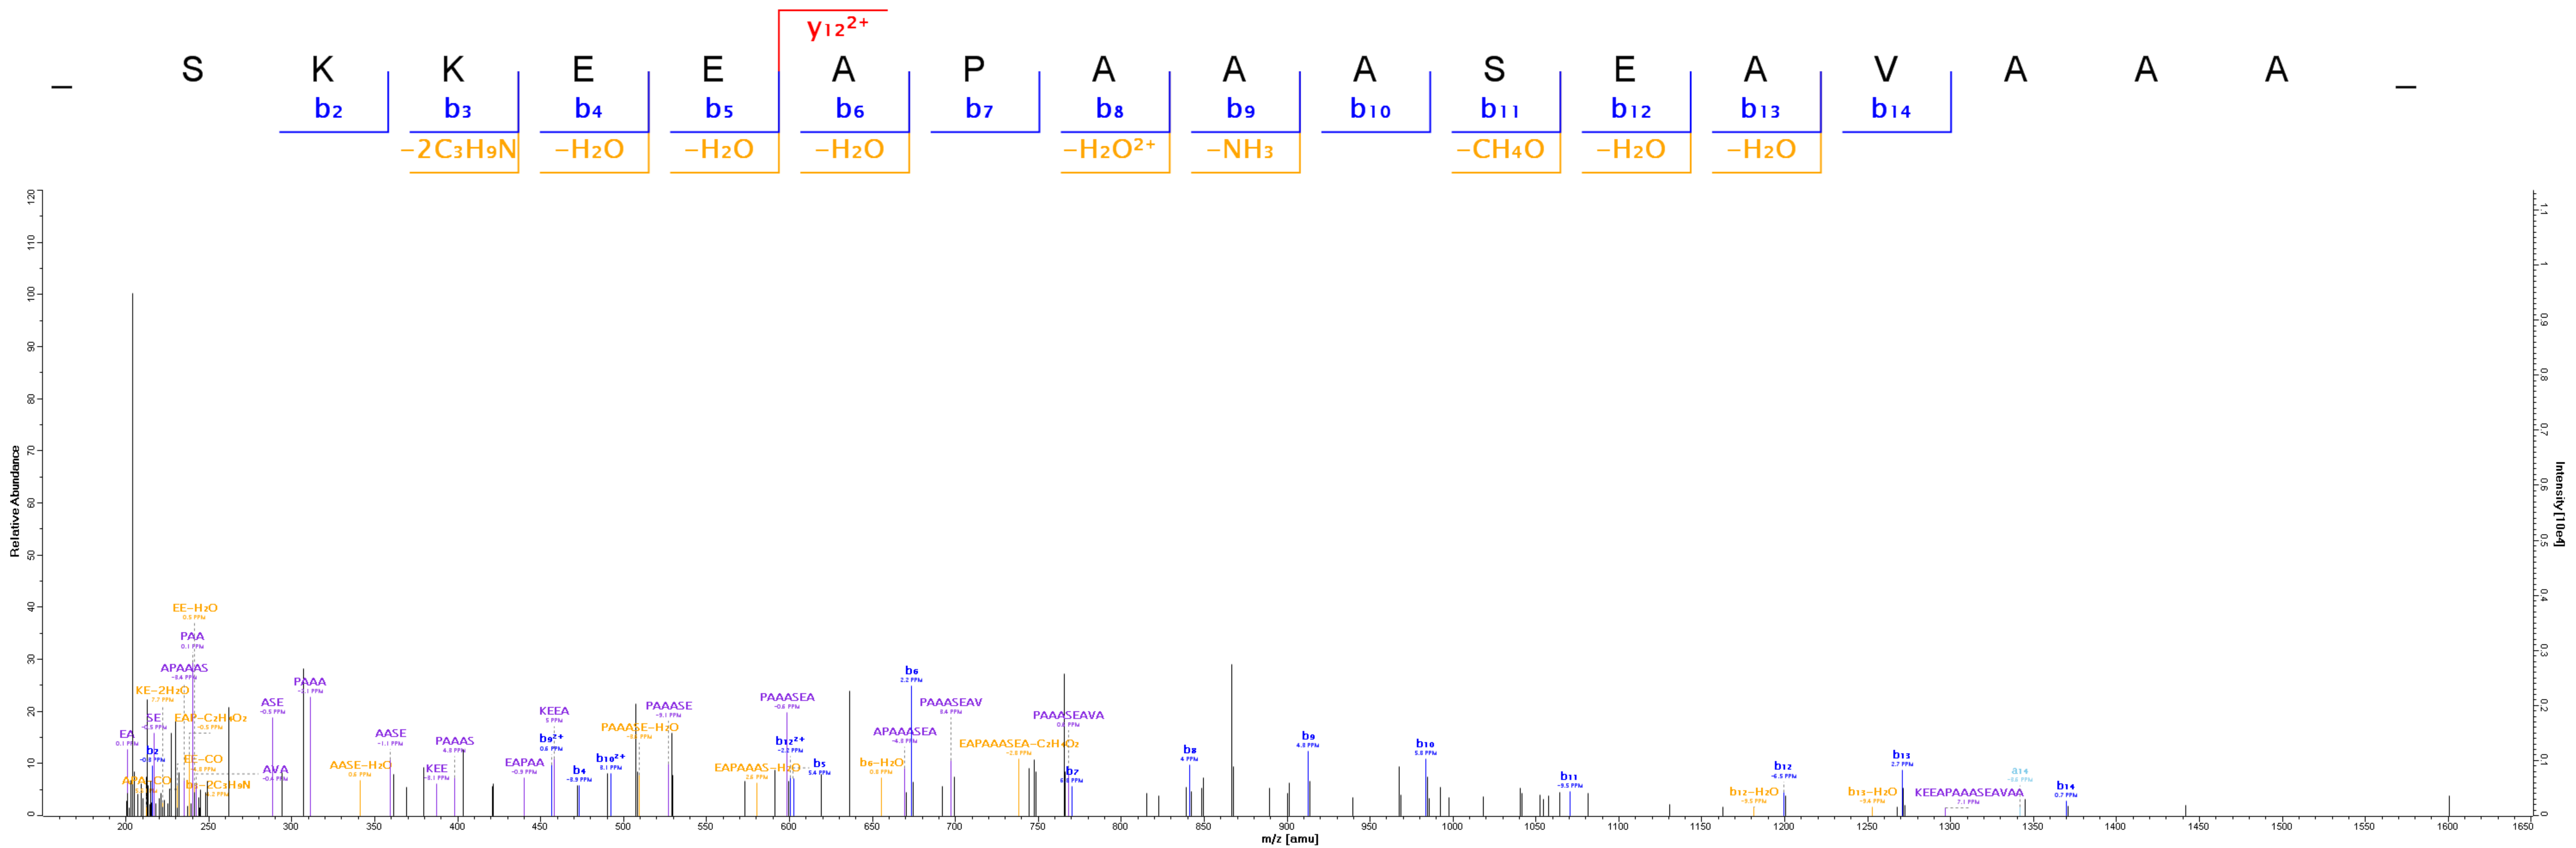

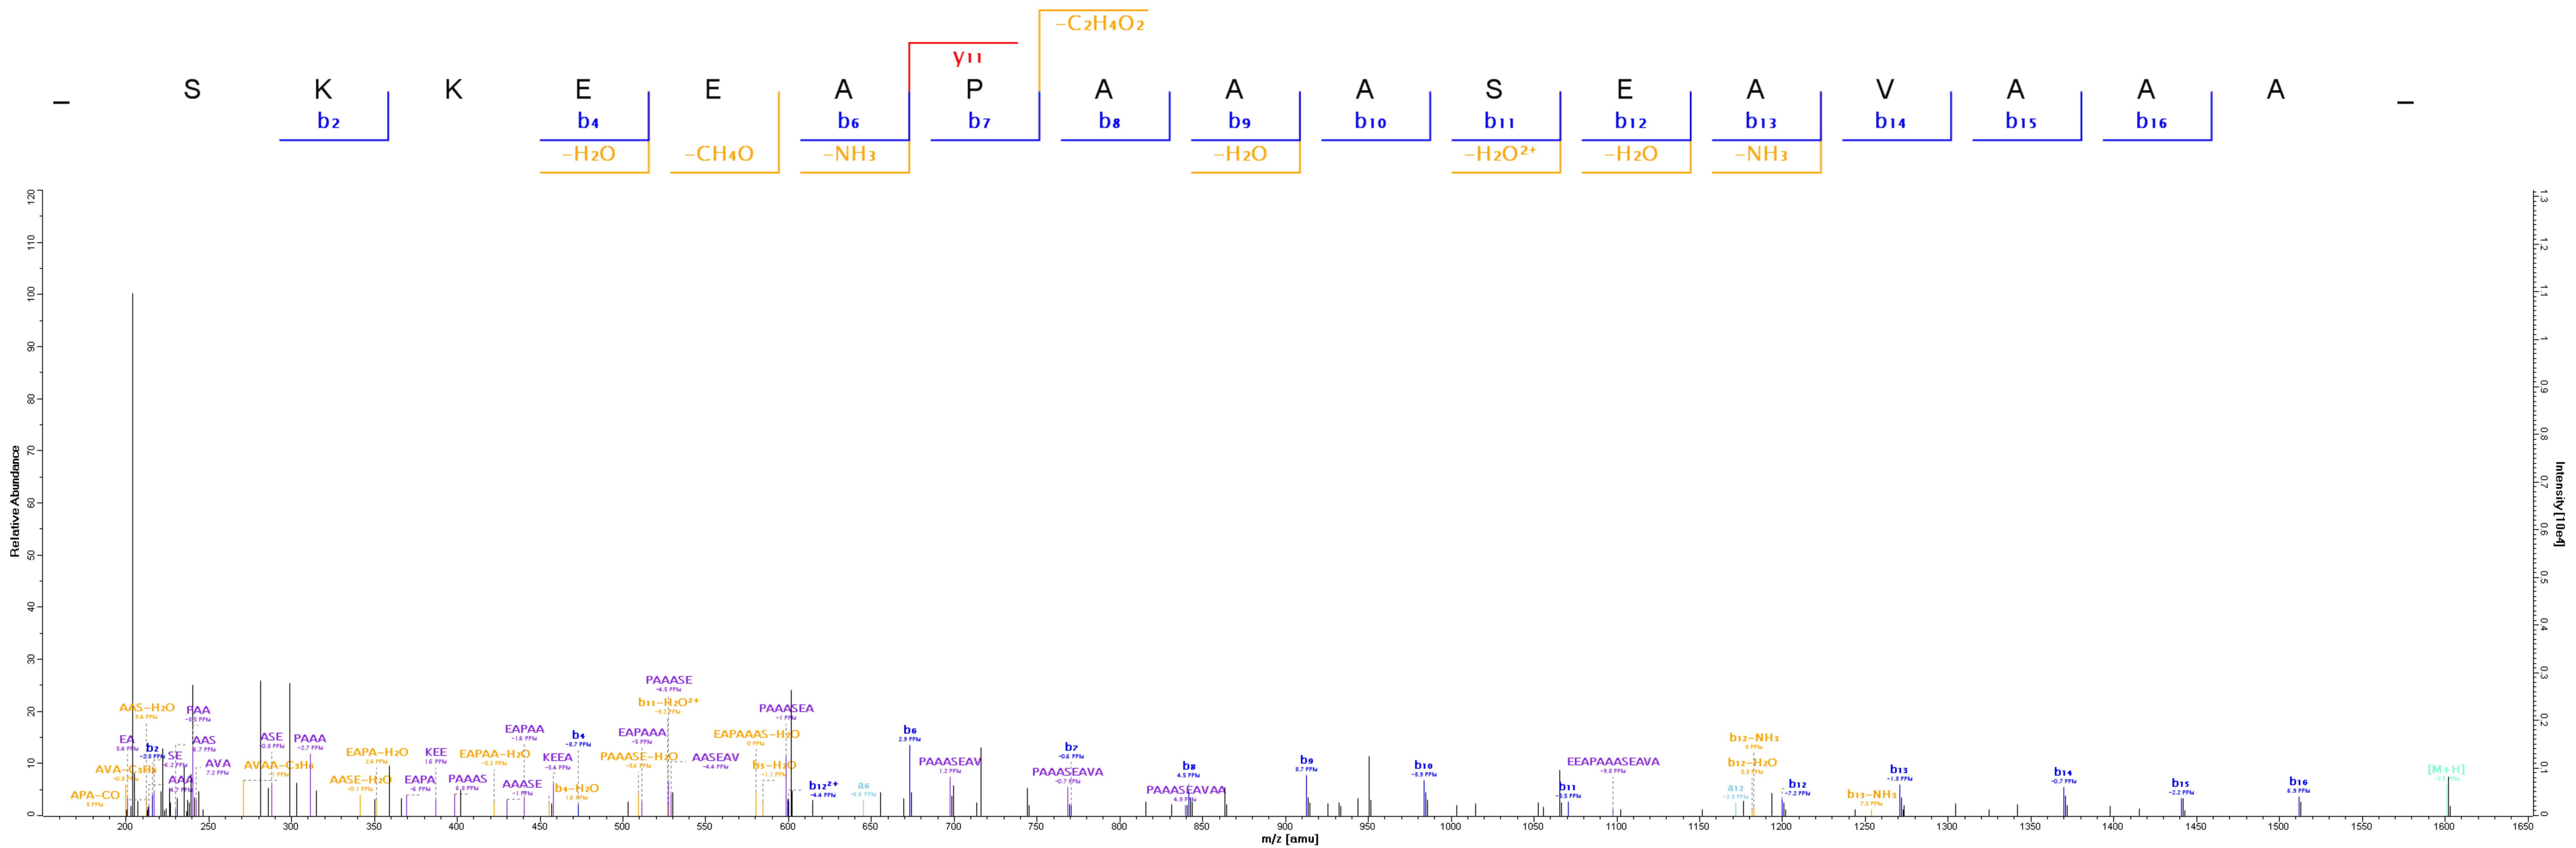

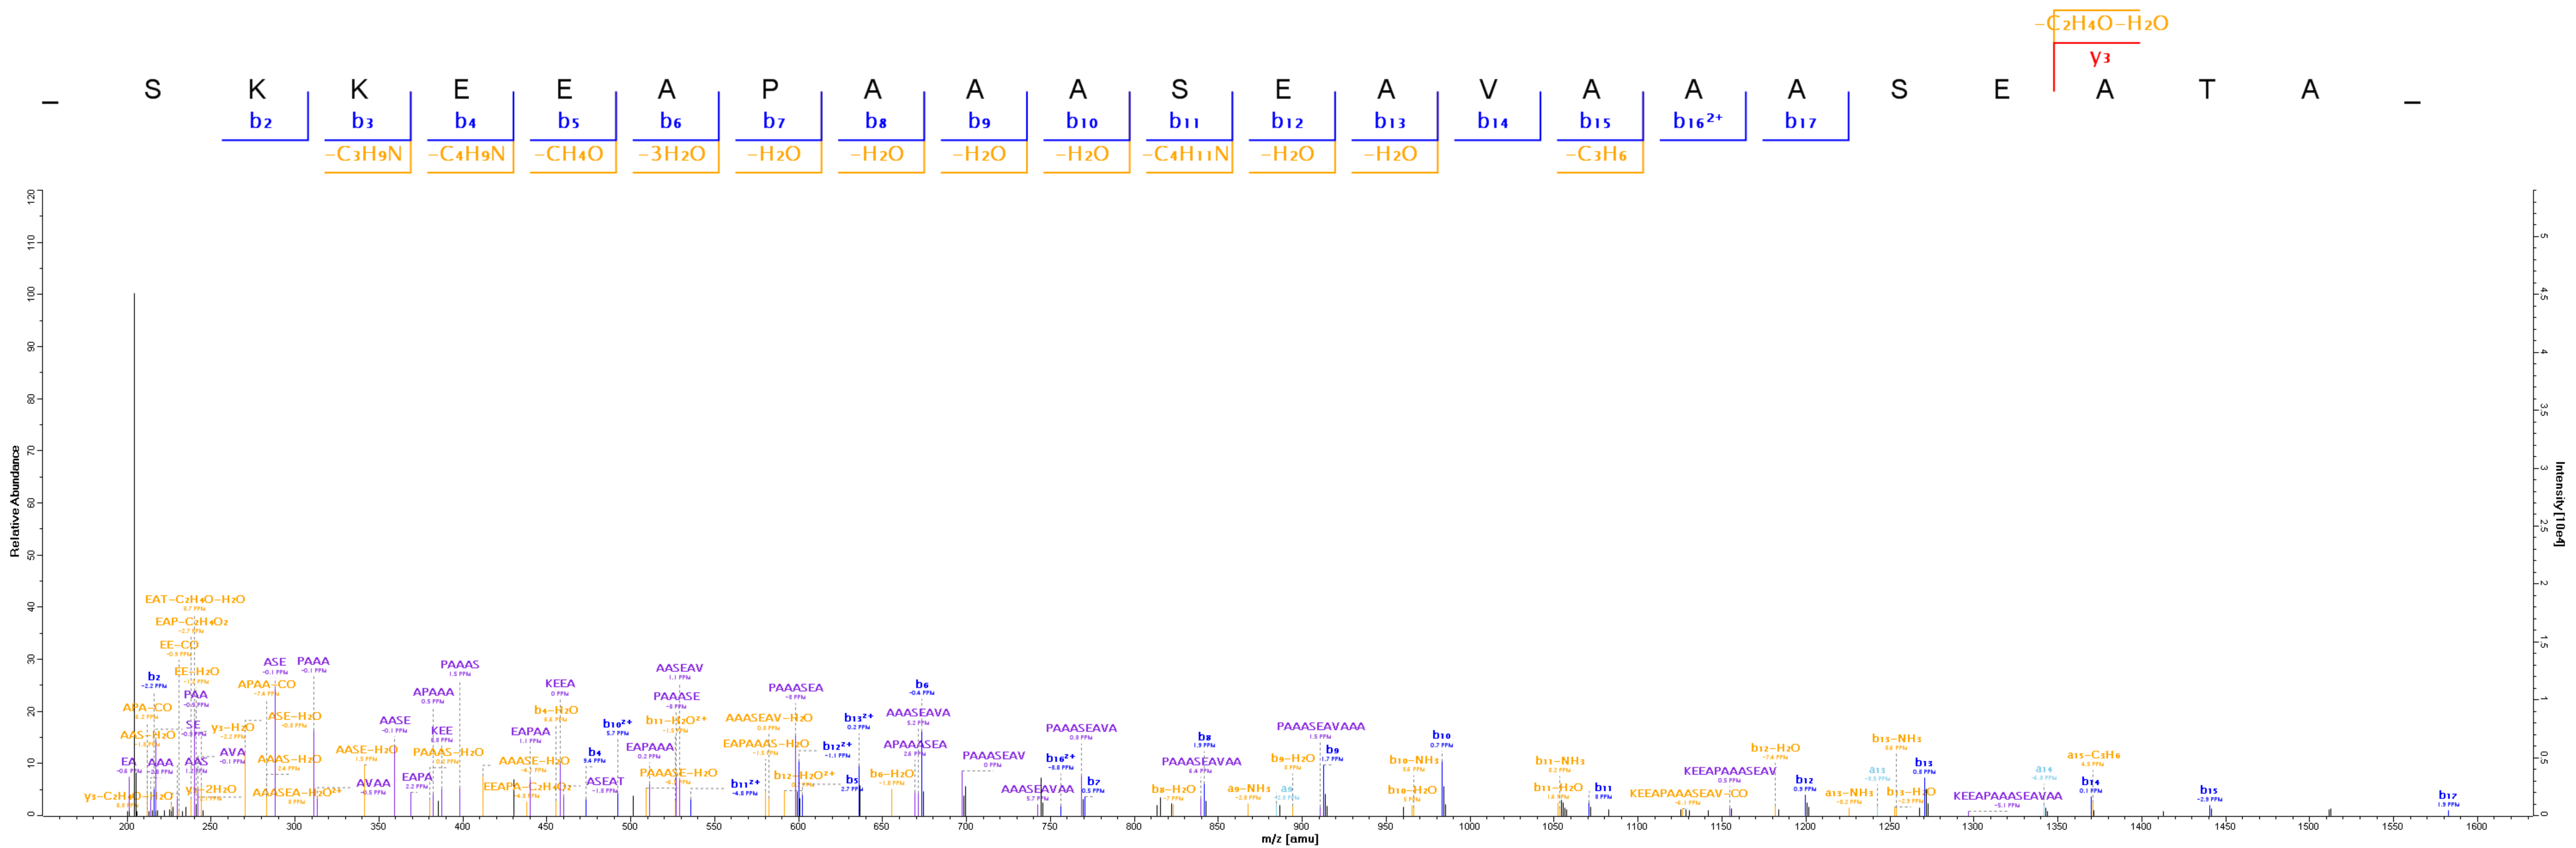

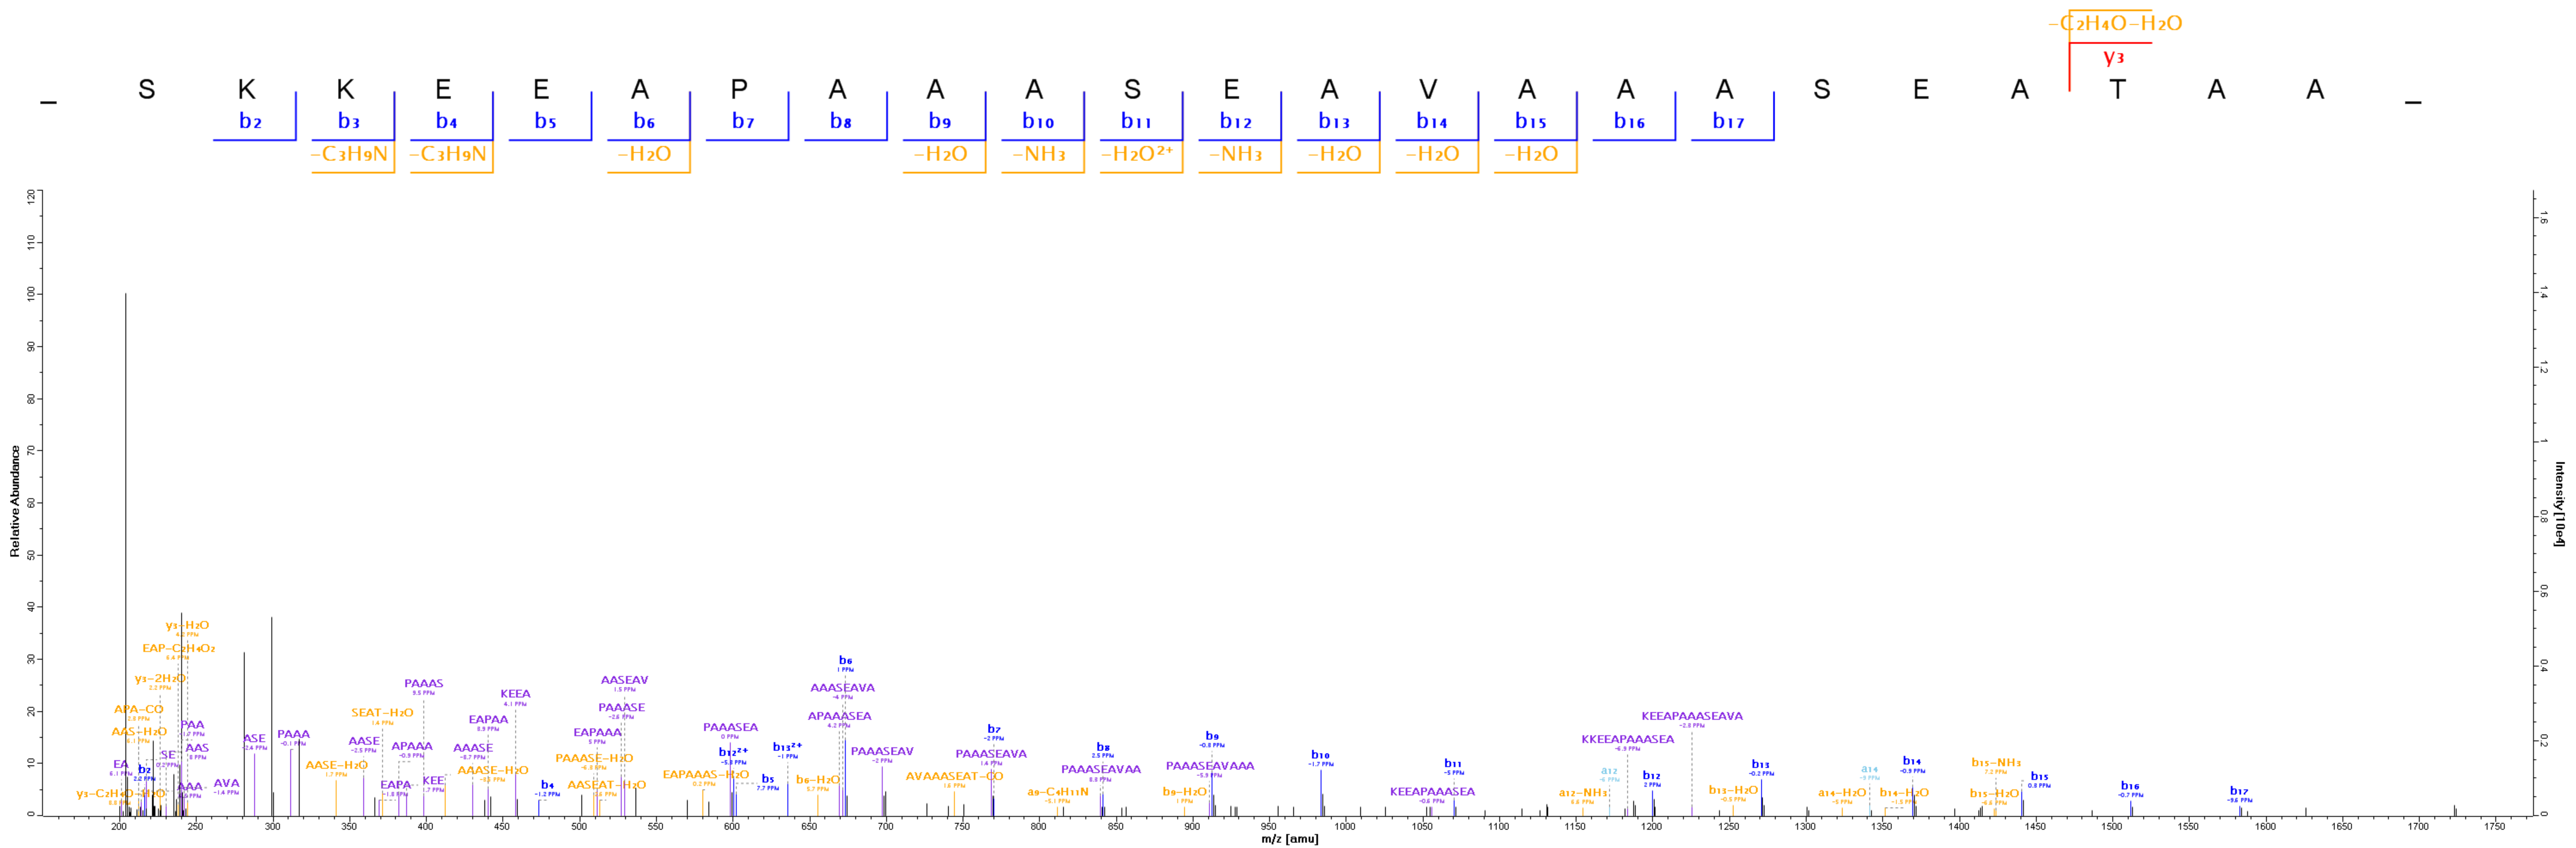



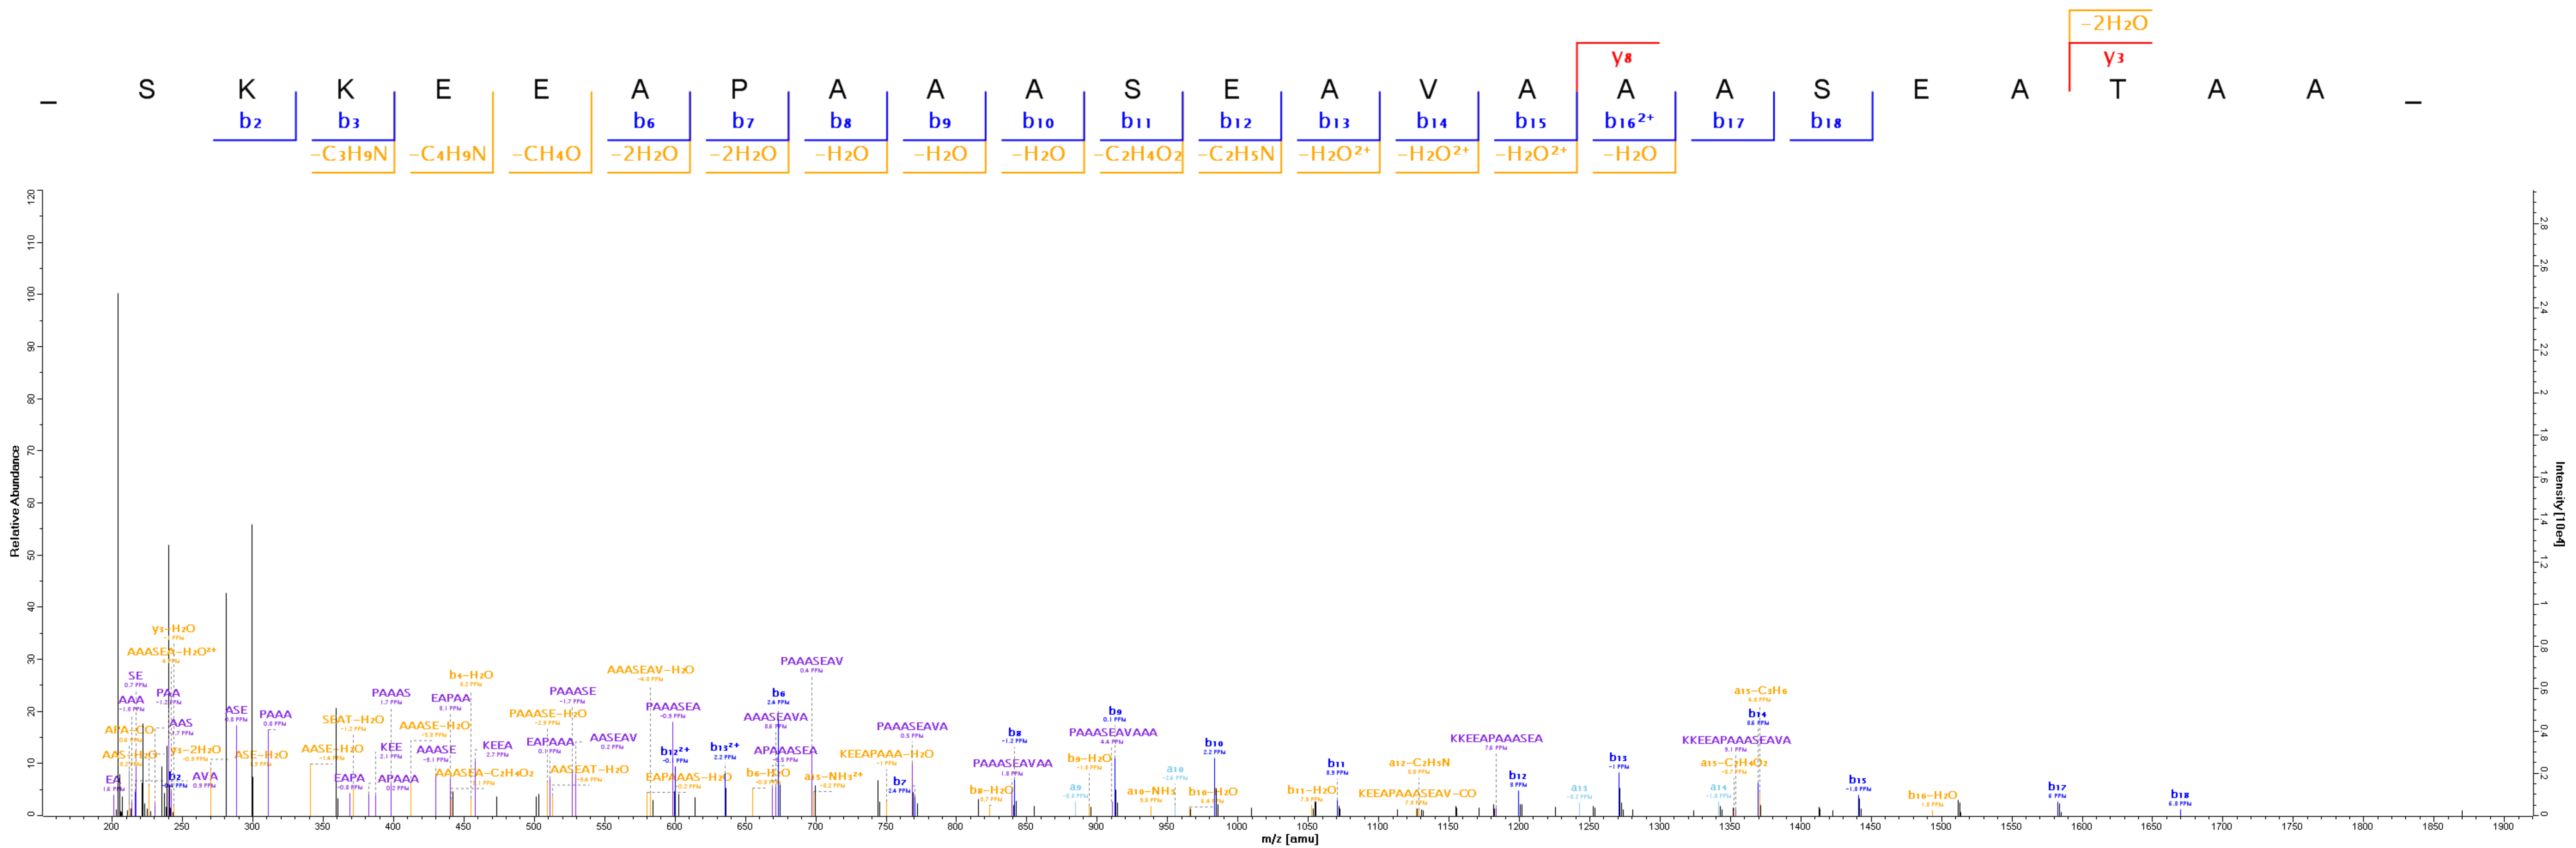



S K K E E A P A A A S E A V A A A S E A T A A A

b<sub>2</sub> b<sub>4</sub> b<sub>6</sub> b<sub>8</sub> b<sub>9</sub> b<sub>10</sub> b<sub>11</sub> b<sub>12</sub> b<sub>13</sub> b<sub>14</sub> b<sub>15</sub><sup>2+</sup> b<sub>16</sub>

-H<sub>2</sub>O -H<sub>2</sub>O -2C<sub>2</sub>H<sub>5</sub>N -H<sub>2</sub>O

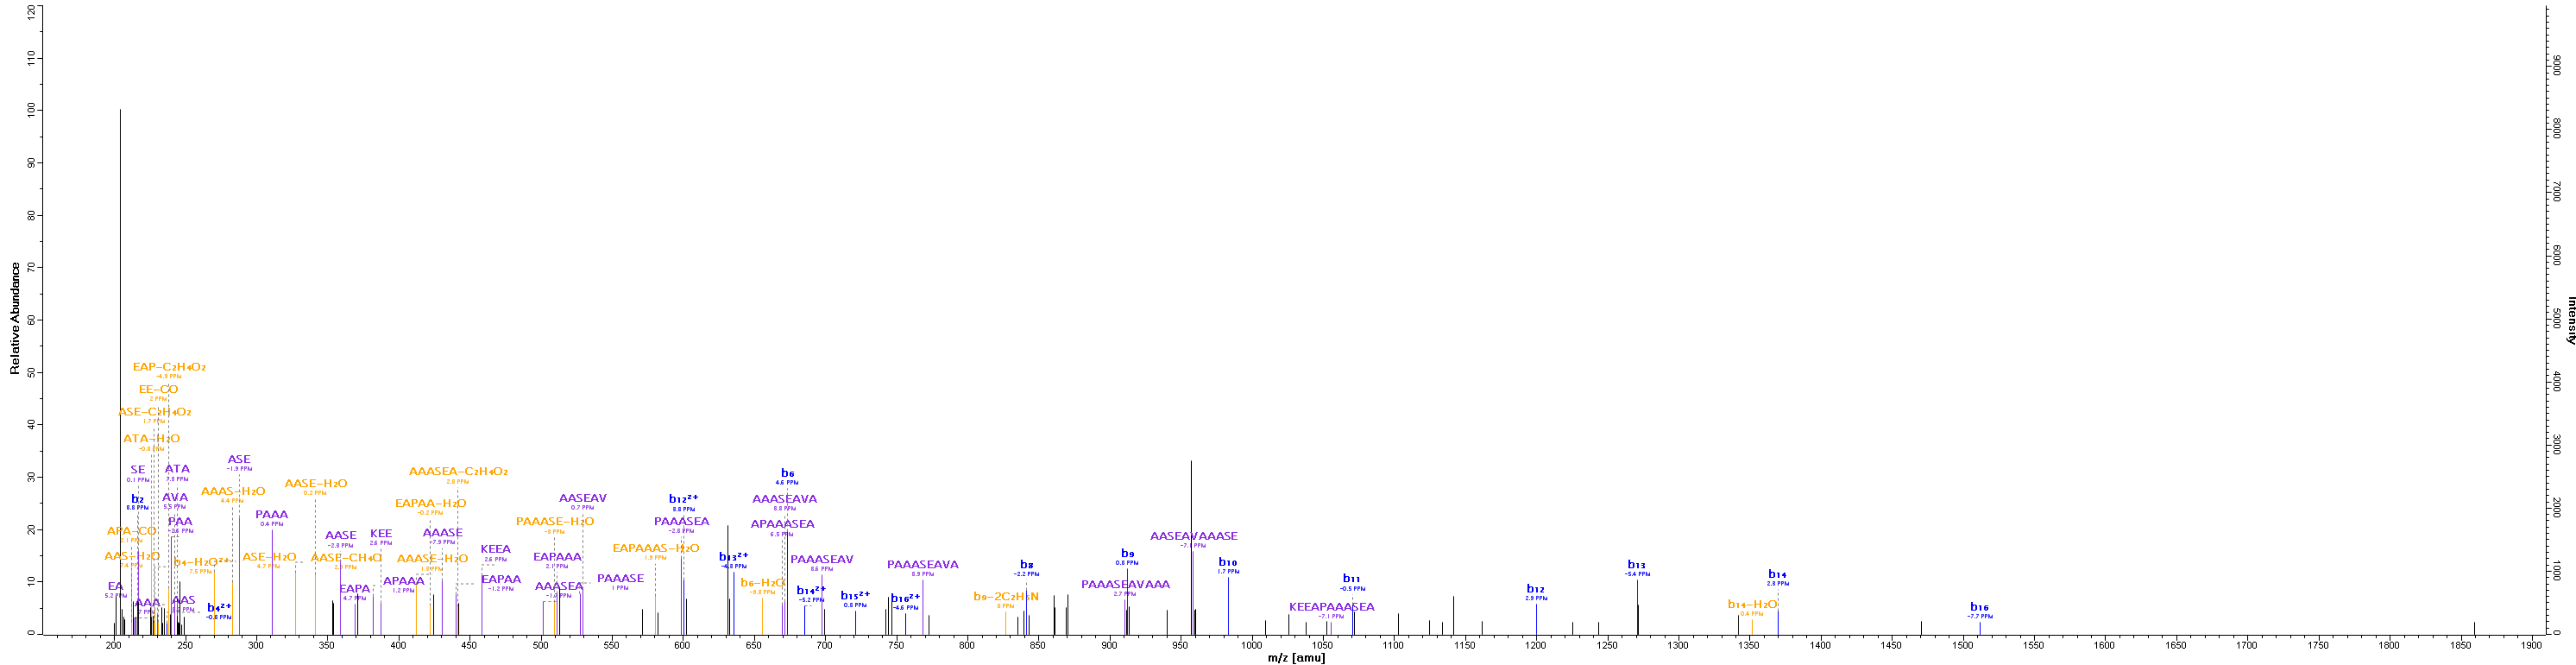

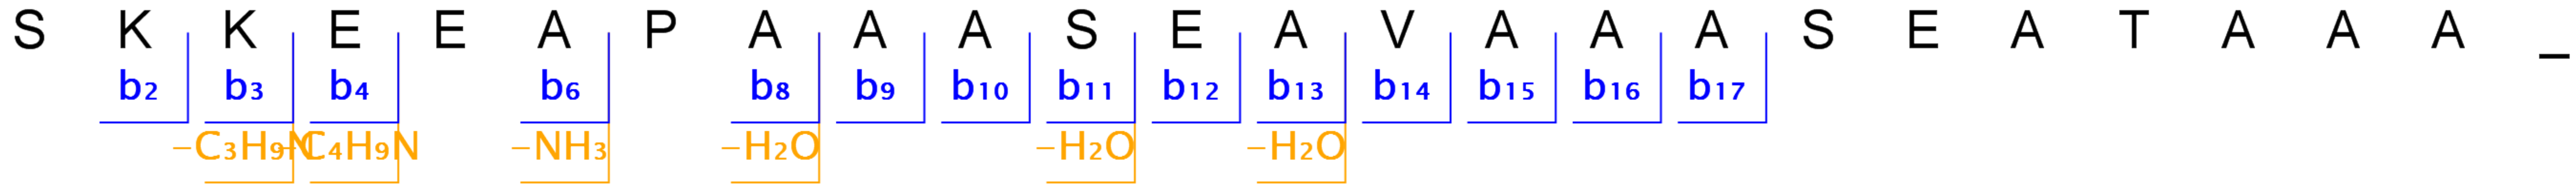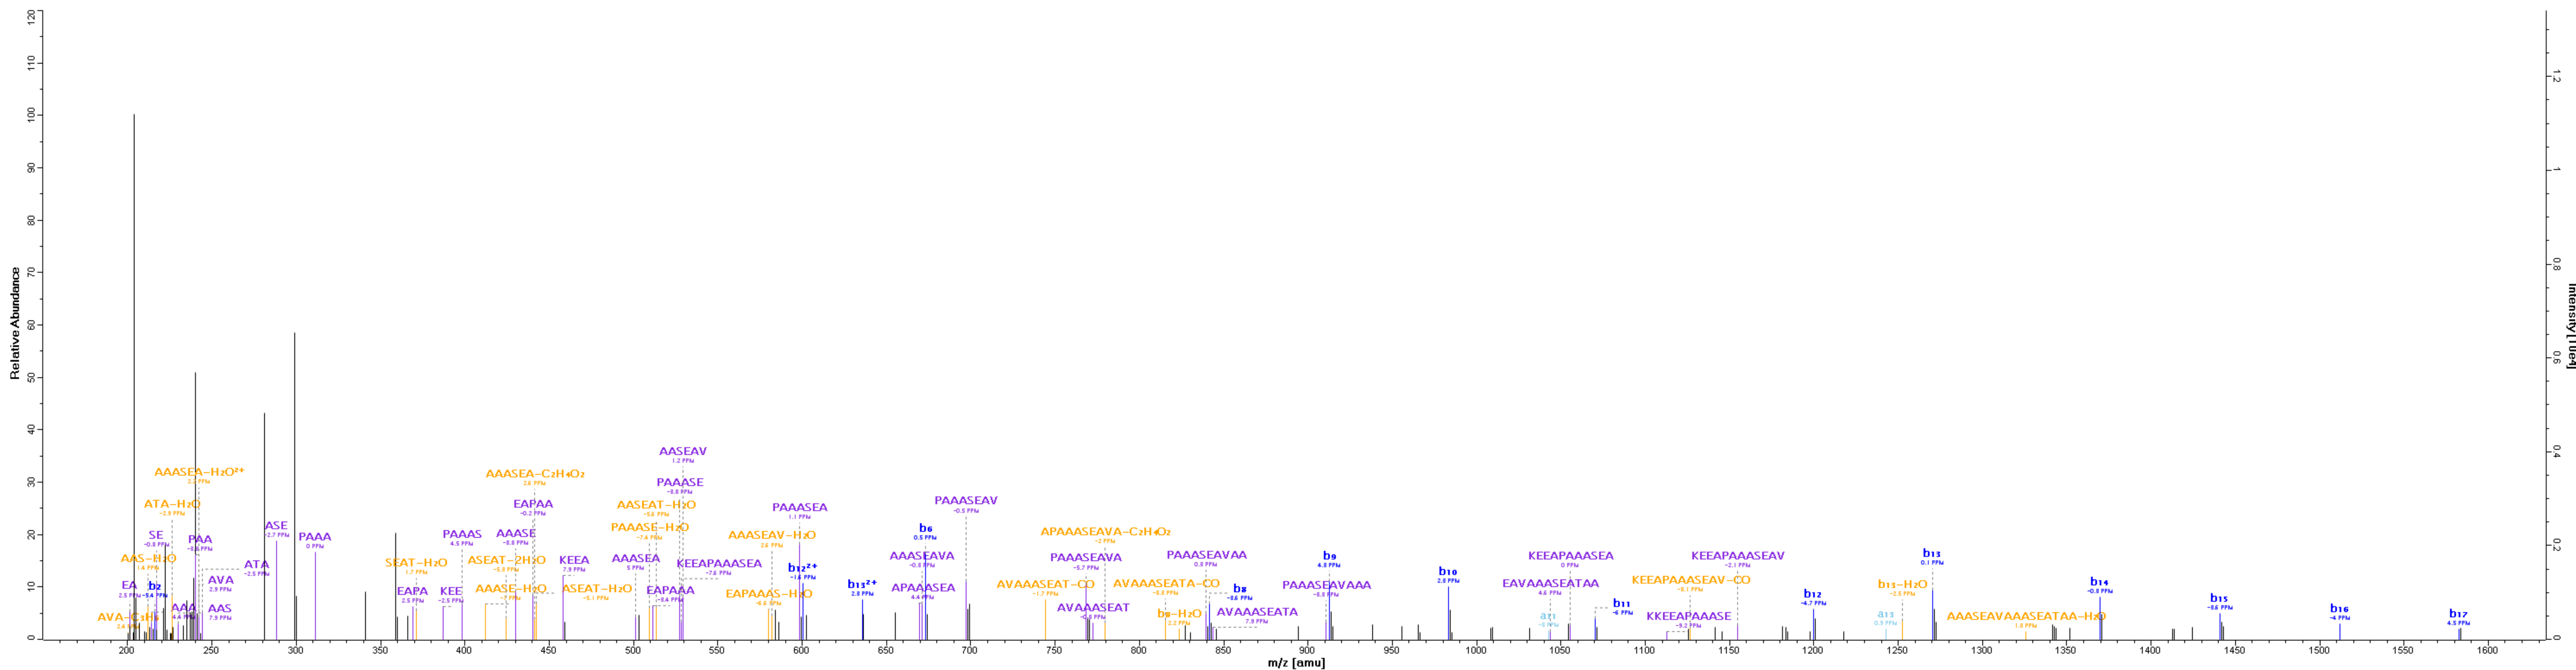

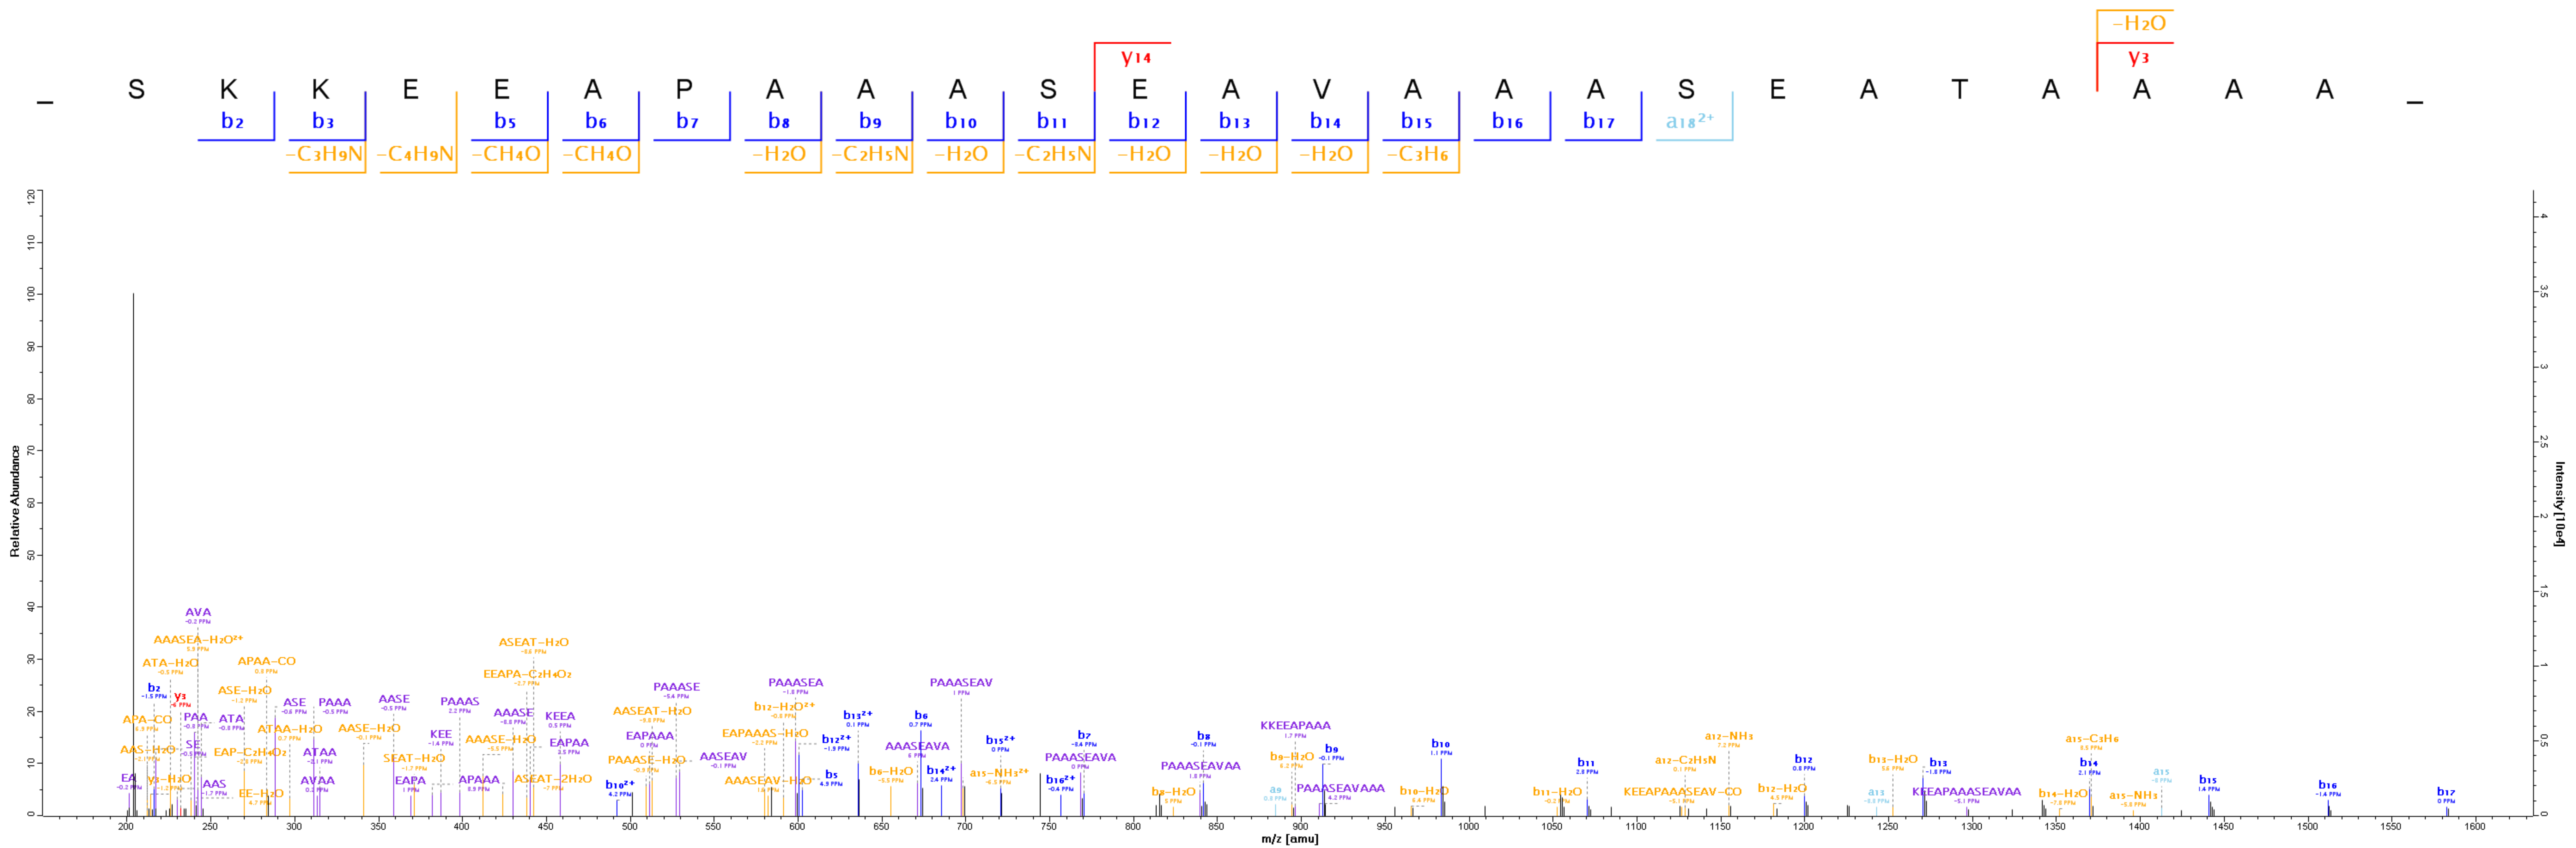

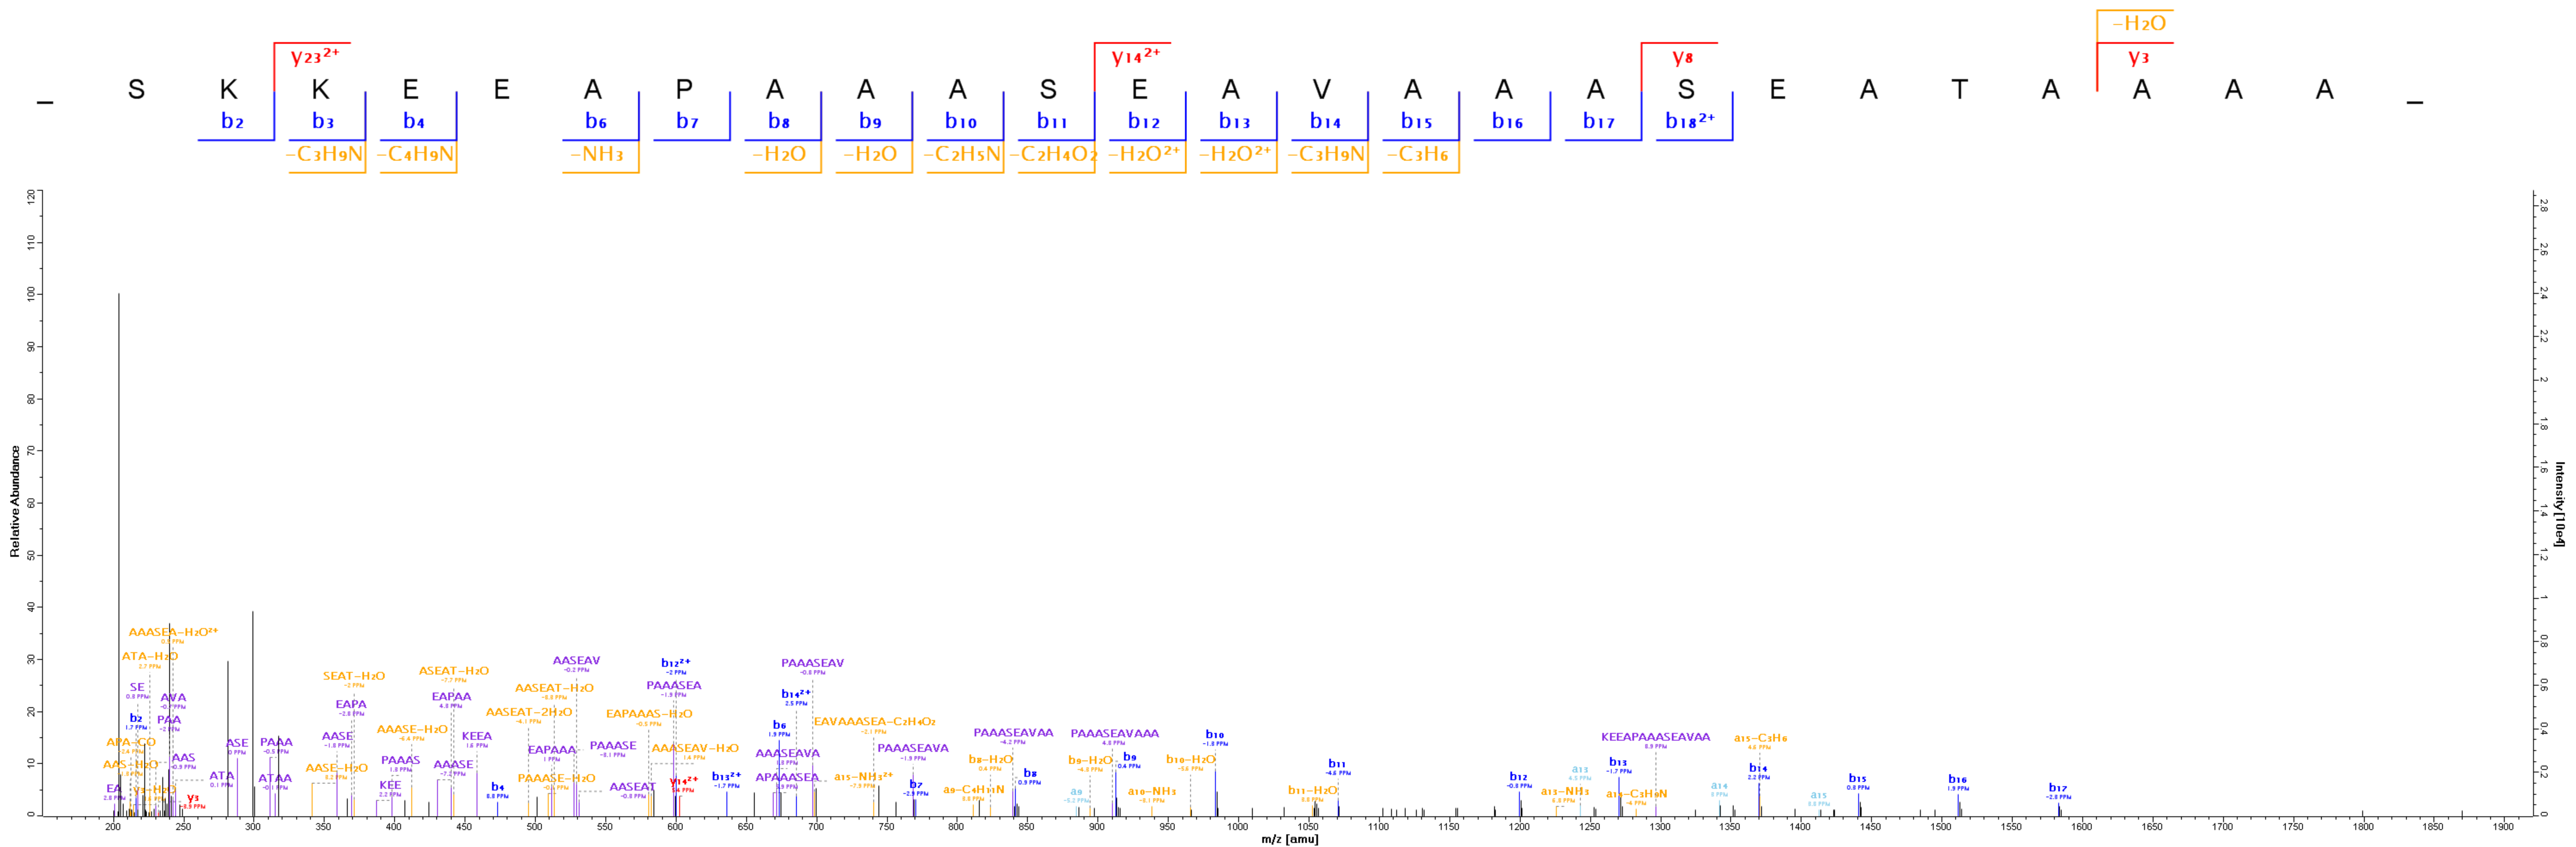

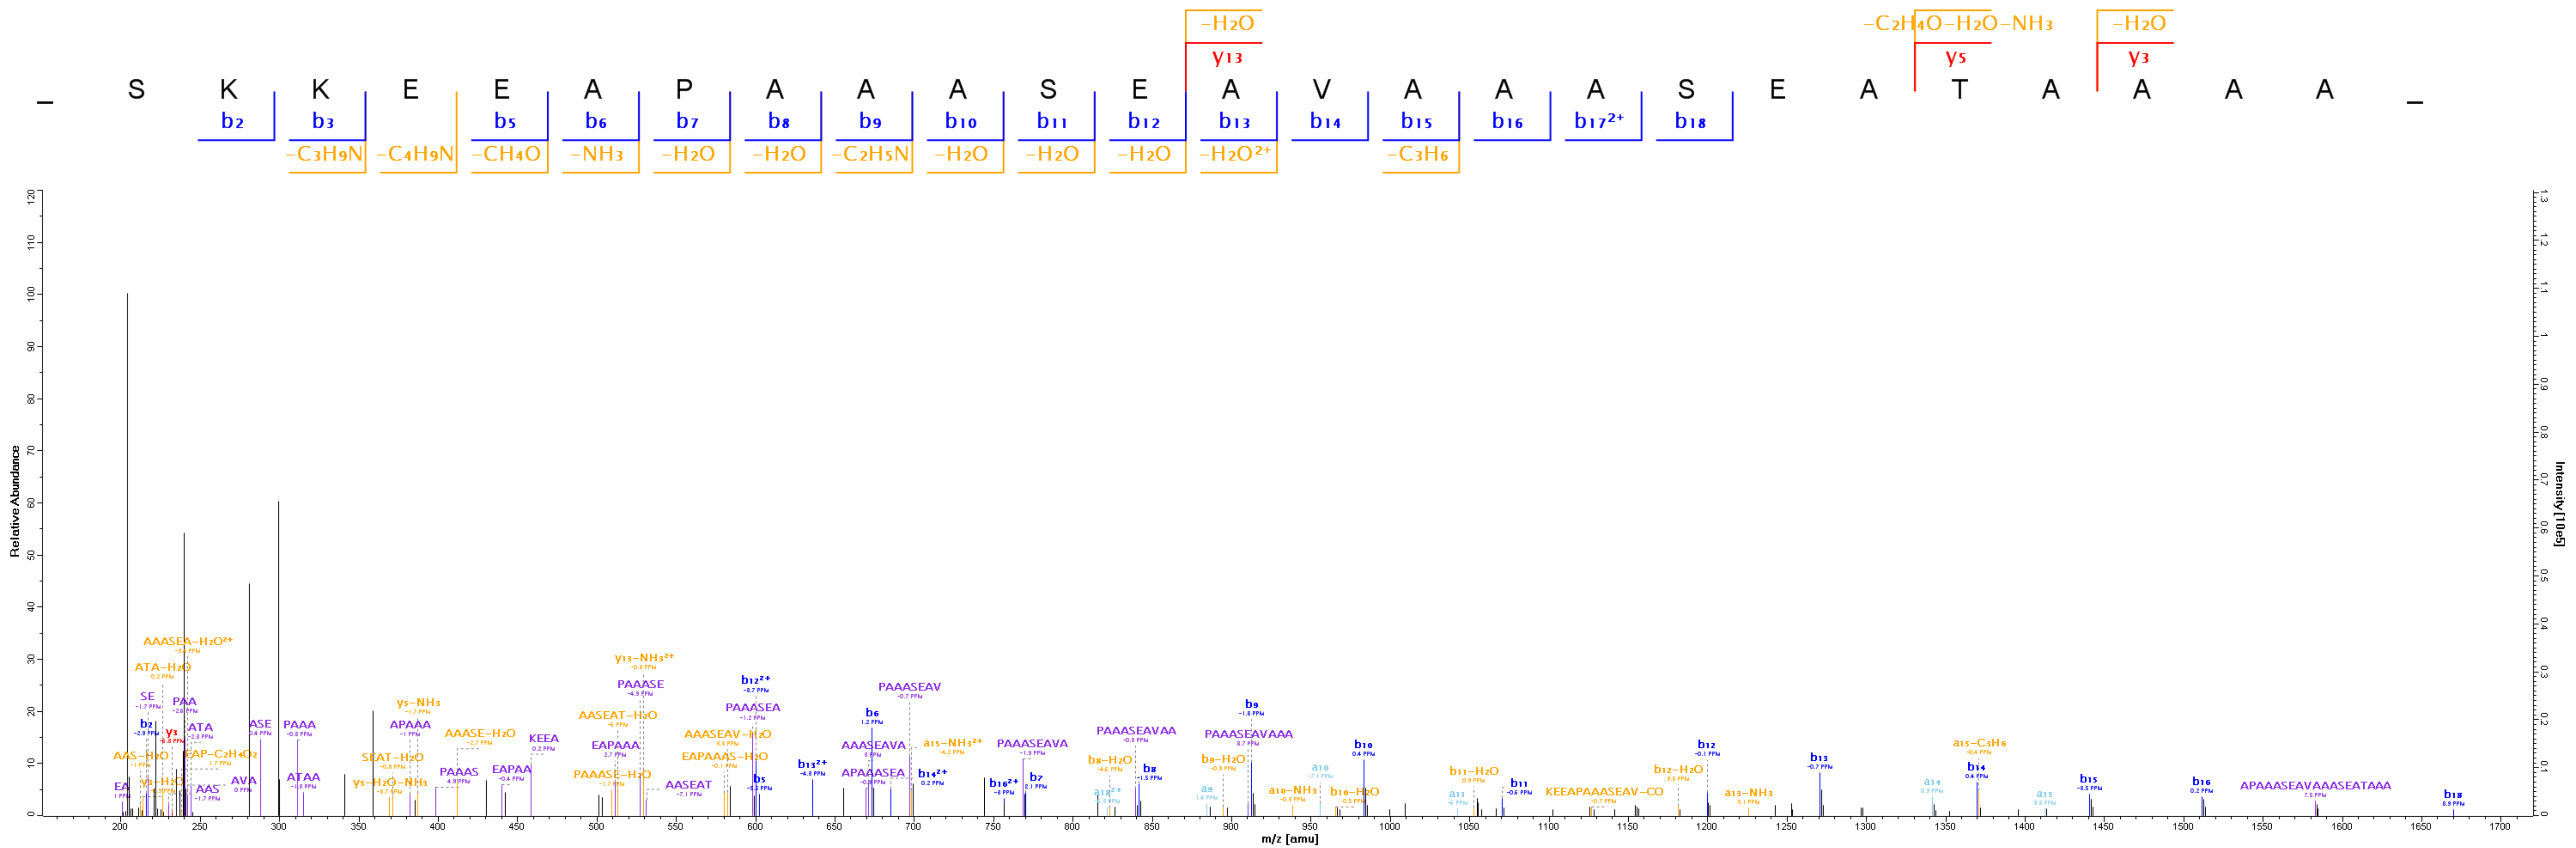

Supplement: supp_M114.038315_mcp.M114.038315-4.pdf [file supp_M114.038315_mcp.M114.038315-4.pdf]
