# Supplementary material
Source: PubMed Central journal article supplement (PMC4159654)

**Supplementary Table 5: HCD identified *Acinetobacter baumannii* (strain Arg 2) glycopeptides**

| Uniprot accession number | protein name                                                                                              | Precursor m/z [Da] | Precursor MH+ [Da] | Precursor Charge | glycan mass | composition                                    | peptide mass | peptide                                                       | Mascot Ion Score | Page |
|--------------------------|-----------------------------------------------------------------------------------------------------------|--------------------|--------------------|------------------|-------------|------------------------------------------------|--------------|---------------------------------------------------------------|------------------|------|
| N8U2Y5_A<br>CIBA         | Uncharacterized protein [F979_02908]<br>[ <i>Acinetobacter baumannii</i> NIPH 146]                        | 1058.48            | 2115.95            | 2                | 843.31      | HexNAc-Hex <sub>2</sub> -316                   | 1272.64      | <sup>49</sup> AASEVAASEAAPAK <sup>62</sup>                    | 62               | 6    |
| N8U2Y5_A<br>CIBA         | Uncharacterized protein [F979_02908]<br>[ <i>Acinetobacter baumannii</i> NIPH 146]                        | 1160.02            | 2319.03            | 2                | 1046.39     | HexNAc <sub>2</sub> -Hex <sub>2</sub> -316     | 1272.64      | <sup>49</sup> AASEVAASEAAPAK <sup>62</sup>                    | 74               | 7    |
| N8U2Y5_A<br>CIBA         | Uncharacterized protein [F979_02908]<br>[ <i>Acinetobacter baumannii</i> NIPH 146]                        | 987.09             | 2959.26            | 3                | 1686.62     | double glycan;<br>HexNAc-Hex <sub>2</sub> -316 | 1272.64      | <sup>49</sup> AASEVAASEAAPAK <sup>62</sup>                    | 45               | 8    |
| N8Y212_A<br>CIBA         | Uncharacterized protein [F961_00584]<br>[ <i>Acinetobacter baumannii</i> NIPH 60]                         | 919.07             | 2755.20            | 3                | 843.31      | HexNAc-Hex <sub>2</sub> -316                   | 1911.89      | <sup>86</sup> AEDPNADSGIAASEPTAPAK <sup>105</sup>             | 83               | 9    |
| A3M265_A<br>CIBT         | Uncharacterized protein [A1S_0556]<br>[ <i>Acinetobacter baumannii</i> (strain ATCC 17978 / NCDC KC 755)] | 906.94             | 1812.88            | 2                | 843.31      | HexNAc-Hex <sub>2</sub> -316                   | 969.57       | <sup>302</sup> AKPASTPAVK <sup>311</sup>                      | 28               | 10   |
| F0QMC7_<br>ACIBD         | Uncharacterized protein [ABTW07_2818]<br>[ <i>Acinetobacter baumannii</i> (strain TCDC-AB0715)]           | 1406.68            | 4218.04            | 3                | 843.31      | HexNAc-Hex <sub>2</sub> -316                   | 3374.73      | <sup>22</sup> ASTTEQPLNPNKVSAPVEDPIDPLAVDAASTVK <sup>54</sup> | 62               | 11   |
| N8U458_A<br>CIBA         | Uncharacterized protein [F979_02578]<br>[ <i>Acinetobacter baumannii</i> NIPH 146]                        | 920.69             | 3679.73            | 4                | 843.31      | HexNAc-Hex <sub>2</sub> -316                   | 2836.42      | <sup>25</sup> ETPKEEEQDKIETAVSEPQPQKPAK <sup>49</sup>         | 22               | 12   |
| N8U2Y5_A<br>CIBA         | Uncharacterized protein [F979_02908]<br>[ <i>Acinetobacter baumannii</i> NIPH 146]                        | 1105.86            | 3315.57            | 3                | 843.31      | HexNAc-Hex <sub>2</sub> -316                   | 2472.26      | <sup>38</sup> FVEVPVANTDKAASEVAASEAAPAK <sup>62</sup>         | 79               | 13   |

|                  |                                                                                                              |         |         |   |         |                                                       |         |                                                             |     |    |
|------------------|--------------------------------------------------------------------------------------------------------------|---------|---------|---|---------|-------------------------------------------------------|---------|-------------------------------------------------------------|-----|----|
| N8U2Y5_A<br>CIBA | Uncharacterized protein<br>[F979_02908]<br>[Acinetobacter baumannii<br>NIPH 146]                             | 1173.55 | 3518.65 | 3 | 1046.39 | HexNAc <sub>2</sub> -Hex <sub>2</sub> -<br>316        | 2472.26 | <sup>38</sup> FVEVPVANTDKAASEVAASEAAPAK <sup>62</sup>       | 78  | 14 |
| N8U2Y5_A<br>CIBA | Uncharacterized protein<br>[F979_02908]<br>[Acinetobacter baumannii<br>NIPH 146]                             | 1386.97 | 4158.88 | 3 | 1686.62 | double<br>glycan;<br>HexNAc-Hex <sub>2</sub> -<br>316 | 2472.26 | <sup>38</sup> FVEVPVANTDKAASEVAASEAAPAK <sup>62</sup>       | 66  | 15 |
| A7FB63_A<br>CIBT | Uncharacterized protein<br>[A1S_3626]<br>[Acinetobacter baumannii<br>(strain ATCC 17978 /<br>NCDC KC 755)]   | 850.70  | 2550.09 | 3 | 843.31  | HexNAc-Hex <sub>2</sub> -<br>316                      | 1706.78 | <sup>50</sup> GDQAASDIATATDNASAK <sup>67</sup>              | 102 | 16 |
| E8PEJ1_A<br>CIB1 | Uncharacterized protein<br>[ABK1_3438]<br>[Acinetobacter baumannii<br>(strain 1656-2)]                       | 1278.61 | 3833.80 | 3 | 843.30  | HexNAc-Hex <sub>2</sub> -<br>316                      | 2990.50 | <sup>214</sup> IDESLLMSAPASSTLNTQPKPTSTNSATK <sup>242</sup> | 45  | 17 |
| N8U458_A<br>CIBA | Uncharacterized protein<br>[F979_02578]<br>[Acinetobacter baumannii<br>NIPH 146]                             | 822.73  | 2466.19 | 3 | 843.31  | HexNAc-Hex <sub>2</sub> -<br>316                      | 1622.87 | <sup>35</sup> IETAVSEPQPQKPAK <sup>49</sup>                 | 47  | 18 |
| A3M9I2_A<br>CIBT | Putative membrane<br>protein [A1S_3179]<br>[Acinetobacter baumannii<br>(strain ATCC 17978 /<br>NCDC KC 755)] | 1246.34 | 4982.35 | 4 | 843.30  | HexNAc-Hex <sub>2</sub> -<br>316                      | 4139.04 | <sup>48</sup> IIQQQAQASKPQINSQAASSVTPQTQVANDMADG            | 22  | 19 |
| F0QMC7_<br>ACIBD | Uncharacterized protein<br>[ABTW07_2818]<br>[Acinetobacter baumannii<br>(strain TCDC-AB0715)]                | 1022.50 | 3065.50 | 3 | 843.31  | HexNAc-Hex <sub>2</sub> -<br>316                      | 2222.19 | <sup>33</sup> KVSAPVEDPIDPLAVDAASTVK <sup>54</sup>          | 59  | 20 |
| A7FB95_A<br>CIBT | Uncharacterized protein<br>[A1S_3658]<br>[Acinetobacter baumannii<br>(strain ATCC 17978 /<br>NCDC KC 755)]   | 597.71  | 1194.42 | 2 | 203.08  | HexNAc                                                | 991.34  | <sup>28</sup> NDGM(+16)HEASD <sup>42</sup>                  | 49  | 21 |

|                  |                                                                                                            |         |         |   |        |                                  |         |                                                          |     |    |
|------------------|------------------------------------------------------------------------------------------------------------|---------|---------|---|--------|----------------------------------|---------|----------------------------------------------------------|-----|----|
| A7FB95_A<br>CIBT | Uncharacterized protein<br>[A1S_3658]<br>[Acinetobacter baumannii<br>(strain ATCC 17978 /<br>NCDC KC 755)] | 720.62  | 2159.86 | 3 | 203.08 | HexNAc                           | 1956.78 | <sup>28</sup> NDGMHEASDPATSHDMNK <sup>45</sup>           | 85  | 22 |
| A7FB95_A<br>CIBT | Uncharacterized protein<br>[A1S_3658]<br>[Acinetobacter baumannii<br>(strain ATCC 17978 /<br>NCDC KC 755)] | 880.02  | 2638.04 | 3 | 681.26 | HexNAc-Hex-<br>316               | 1956.78 | <sup>28</sup> NDGMHEASDPATSHDMNK <sup>45</sup>           | 56  | 23 |
| A7FB95_A<br>CIBT | Uncharacterized protein<br>[A1S_3658]<br>[Acinetobacter baumannii<br>(strain ATCC 17978 /<br>NCDC KC 755)] | 939.36  | 2816.08 | 3 | 843.30 | HexNAc-Hex <sub>2</sub> -<br>316 | 1972.78 | <sup>28</sup> NDGM(+16)HEASDPATSHDMNK <sup>45</sup>      | 76  | 24 |
| A7FB95_A<br>CIBT | Uncharacterized protein<br>[A1S_3658]<br>[Acinetobacter baumannii<br>(strain ATCC 17978 /<br>NCDC KC 755)] | 1400.55 | 2800.09 | 2 | 843.31 | HexNAc-Hex <sub>2</sub> -<br>316 | 1956.78 | <sup>28</sup> NDGMHEASDPATSHDMNK <sup>45</sup>           | 102 | 25 |
| A7FB95_A<br>CIBT | Uncharacterized protein<br>[A1S_3658]<br>[Acinetobacter baumannii<br>(strain ATCC 17978 /<br>NCDC KC 755)] | 947.71  | 2841.12 | 3 | 884.34 | HexNAc-Hex-<br>HexNAc-316        | 1956.78 | <sup>28</sup> NDGMHEASDPATSHDMNK <sup>45</sup>           | 73  | 26 |
| A7FB95_A<br>CIBT | Uncharacterized protein<br>[A1S_3658]<br>[Acinetobacter baumannii<br>(strain ATCC 17978 /<br>NCDC KC 755)] | 934.36  | 2801.07 | 3 | 843.31 | HexNAc-Hex <sub>2</sub> -<br>316 | 1957.77 | <sup>28</sup> N(+1)DGMHEASDPATSHDMNK <sup>45</sup>       | 78  | 27 |
| A7FB95_A<br>CIBT | Uncharacterized protein<br>[A1S_3658]<br>[Acinetobacter baumannii<br>(strain ATCC 17978 /<br>NCDC KC 755)] | 944.70  | 2832.08 | 3 | 843.31 | HexNAc-Hex <sub>2</sub> -<br>316 | 1988.77 | <sup>28</sup> NDGM(+16)HEASDPATSHDM(+16)NK <sup>45</sup> | 58  | 28 |
| K9BT20_A<br>CIBA | L,D-transpeptidase<br>catalytic domain protein<br>[ACINWC487_2700]<br>[Acinetobacter baumannii<br>WC-487]  | 1220.55 | 2440.09 | 2 | 843.30 | HexNAc-Hex <sub>2</sub> -<br>316 | 1596.79 | <sup>89</sup> PNADSGIAASEPTAPAK <sup>105</sup>           | 86  | 29 |

|                  |                                                                                                            |         |         |   |        |                                  |         |                                                      |     |    |
|------------------|------------------------------------------------------------------------------------------------------------|---------|---------|---|--------|----------------------------------|---------|------------------------------------------------------|-----|----|
| K9BT20_A<br>CIBA | L,D-transpeptidase<br>catalytic domain protein<br>[ACINWC487_2700]<br>[Acinetobacter baumannii<br>WC-487]  | 1220.55 | 2440.10 | 2 | 843.31 | HexNAc-Hex <sub>2</sub> -<br>316 | 1596.79 | <sup>89</sup> PNADSGIAASEPTAPAK <sup>105</sup>       | 108 | 30 |
| A7FB63_A<br>CIBT | Uncharacterized protein<br>[A1S_3626]<br>[Acinetobacter baumannii<br>(strain ATCC 17978 /<br>NCDC KC 755)] | 1189.52 | 2378.04 | 2 | 843.31 | HexNAc-Hex <sub>2</sub> -<br>316 | 1534.73 | <sup>52</sup> QAASDIATATDNASAK <sup>67</sup>         | 73  | 31 |
| J5IPS4_A<br>CIBA | Putative lipoprotein<br>[ACINNAV18_3709]<br>[Acinetobacter baumannii<br>Naval-18]                          | 863.10  | 2587.29 | 3 | 843.31 | HexNAc-Hex <sub>2</sub> -<br>316 | 1743.99 | <sup>110</sup> RPQPLVNAPVASQAK <sup>126</sup>        | 44  | 32 |
| A7FB63_A<br>CIBT | Uncharacterized protein<br>[A1S_3626]<br>[Acinetobacter baumannii<br>(strain ATCC 17978 /<br>NCDC KC 755)] | 894.06  | 2680.17 | 3 | 815.31 | HexNAc-Hex-<br>450               | 1864.85 | <sup>48</sup> SAGNEAASDIATATDNASAK <sup>67</sup>     | 56  | 33 |
| A7FB63_A<br>CIBT | Uncharacterized protein<br>[A1S_3626]<br>[Acinetobacter baumannii<br>(strain ATCC 17978 /<br>NCDC KC 755)] | 1354.58 | 2708.16 | 2 | 843.31 | HexNAc-Hex <sub>2</sub> -<br>316 | 1864.85 | <sup>48</sup> SAGNEAASDIATATDNASAK <sup>67</sup>     | 99  | 34 |
| A7FB63_A<br>CIBT | Uncharacterized protein<br>[A1S_3626]<br>[Acinetobacter baumannii<br>(strain ATCC 17978 /<br>NCDC KC 755)] | 917.07  | 2749.20 | 3 | 884.34 | HexNAc-Hex-<br>HexNAc-316        | 1864.85 | <sup>48</sup> SAGNEAASDIATATDNASAK <sup>67</sup>     | 77  | 35 |
| A7FB63_A<br>CIBT | Uncharacterized protein<br>[A1S_3626]<br>[Acinetobacter baumannii<br>(strain ATCC 17978 /<br>NCDC KC 755)] | 1355.07 | 2709.14 | 2 | 843.31 | HexNAc-Hex <sub>2</sub> -<br>316 | 1865.84 | <sup>48</sup> SAGNEAASDIATATDN(+1)ASAK <sup>67</sup> | 97  | 36 |
| A7FB63_A<br>CIBT | Uncharacterized protein<br>[A1S_3626]<br>[Acinetobacter baumannii<br>(strain ATCC 17978 /<br>NCDC KC 755)] | 1010.93 | 2020.84 | 2 | 843.31 | HexNAc-Hex <sub>2</sub> -<br>316 | 1177.53 | <sup>48</sup> SAGNEAASDIATA <sup>60</sup>            | 42  | 37 |

|                  |                                                                                                            |         |         |   |        |                                  |         |                                                     |    |    |
|------------------|------------------------------------------------------------------------------------------------------------|---------|---------|---|--------|----------------------------------|---------|-----------------------------------------------------|----|----|
| A7FB63_A<br>CIBT | Uncharacterized protein<br>[A1S_3626]<br>[Acinetobacter baumannii<br>(strain ATCC 17978 /<br>NCDC KC 755)] | 1034.47 | 2067.93 | 2 | 203.08 | HexNAc                           | 1864.85 | <sup>48</sup> SAGNEAASDIATATDNASAK <sup>67</sup>    | 55 | 38 |
| A7FB63_A<br>CIBT | Uncharacterized protein<br>[A1S_3626]<br>[Acinetobacter baumannii<br>(strain ATCC 17978 /<br>NCDC KC 755)] | 798.02  | 2392.04 | 3 | 527.18 | HexNAc-Hex <sub>2</sub>          | 1864.85 | <sup>48</sup> SAGNEAASDIATATDNASAK <sup>67</sup>    | 72 | 39 |
| A7FB63_A<br>CIBT | Uncharacterized protein<br>[A1S_3626]<br>[Acinetobacter baumannii<br>(strain ATCC 17978 /<br>NCDC KC 755)] | 1273.56 | 2546.11 | 2 | 681.26 | HexNAc-Hex-<br>316               | 1864.85 | <sup>48</sup> SAGNEAASDIATATDNASAK <sup>67</sup>    | 71 | 40 |
| A7FB63_A<br>CIBT | Uncharacterized protein<br>[A1S_3626]<br>[Acinetobacter baumannii<br>(strain ATCC 17978 /<br>NCDC KC 755)] | 863.05  | 2587.13 | 3 | 722.28 | HexNAc <sub>2</sub> -316         | 1864.85 | <sup>48</sup> SAGNEAASDIATATDNASAK <sup>67</sup>    | 91 | 41 |
| F0QNY6_A<br>CIBD | Uncharacterized protein<br>[ABTW07_0589]<br>[Acinetobacter baumannii<br>(strain TCDC-AB0715)]              | 1032.45 | 3095.35 | 3 | 843.31 | HexNAc-Hex <sub>2</sub> -<br>316 | 2252.04 | <sup>115</sup> TEASVAAATEQQDSFDAQVQR <sup>135</sup> | 84 | 42 |

**Supplementary table 5:** Identifications are labeled according to the corresponding Uniprot accession number and protein name. The parent m/z, charge state, deconvoluted mass, glycan mass, glycan composition, peptide mass, peptide sequence and mascot ion score are provided for each identified glycopeptide. All identified glycopeptide HCD spectra are provided and are available on the designated pages.

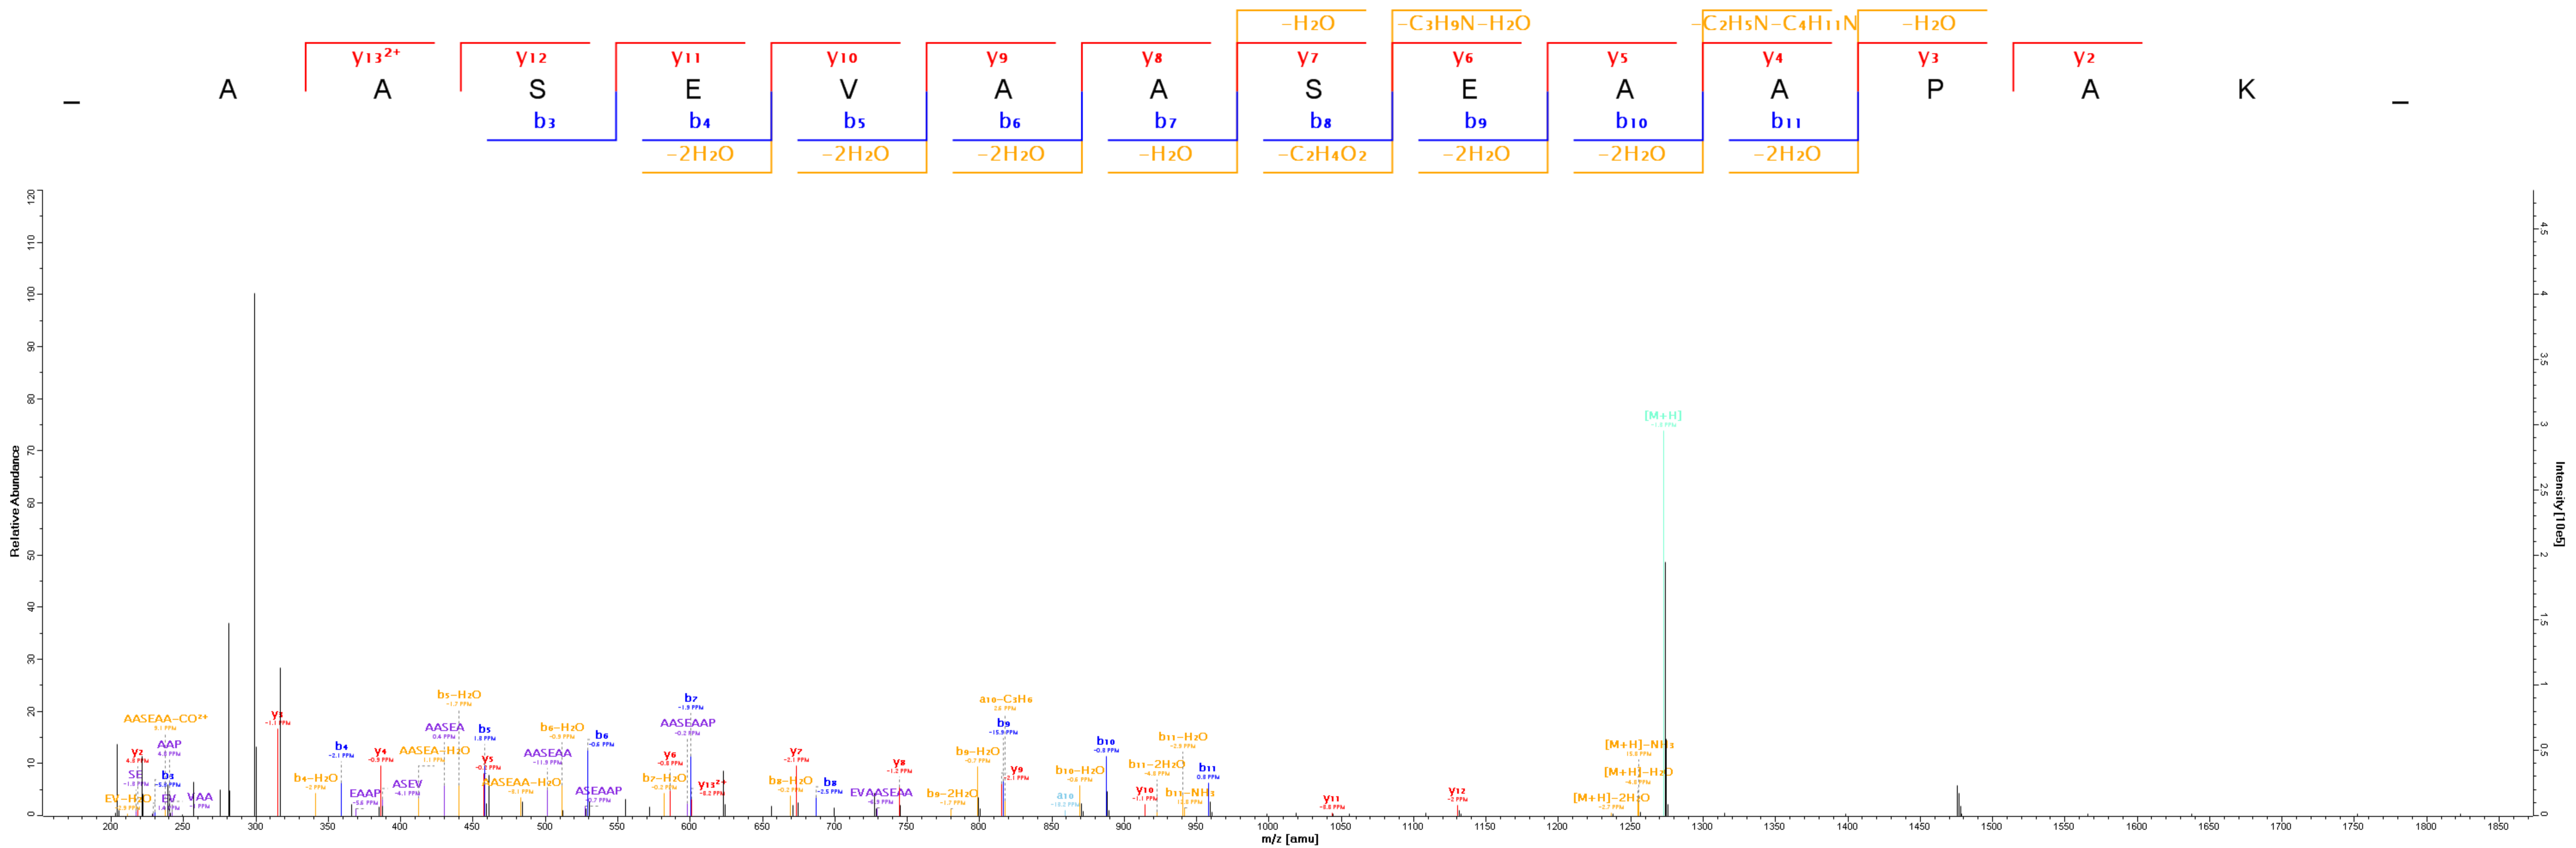

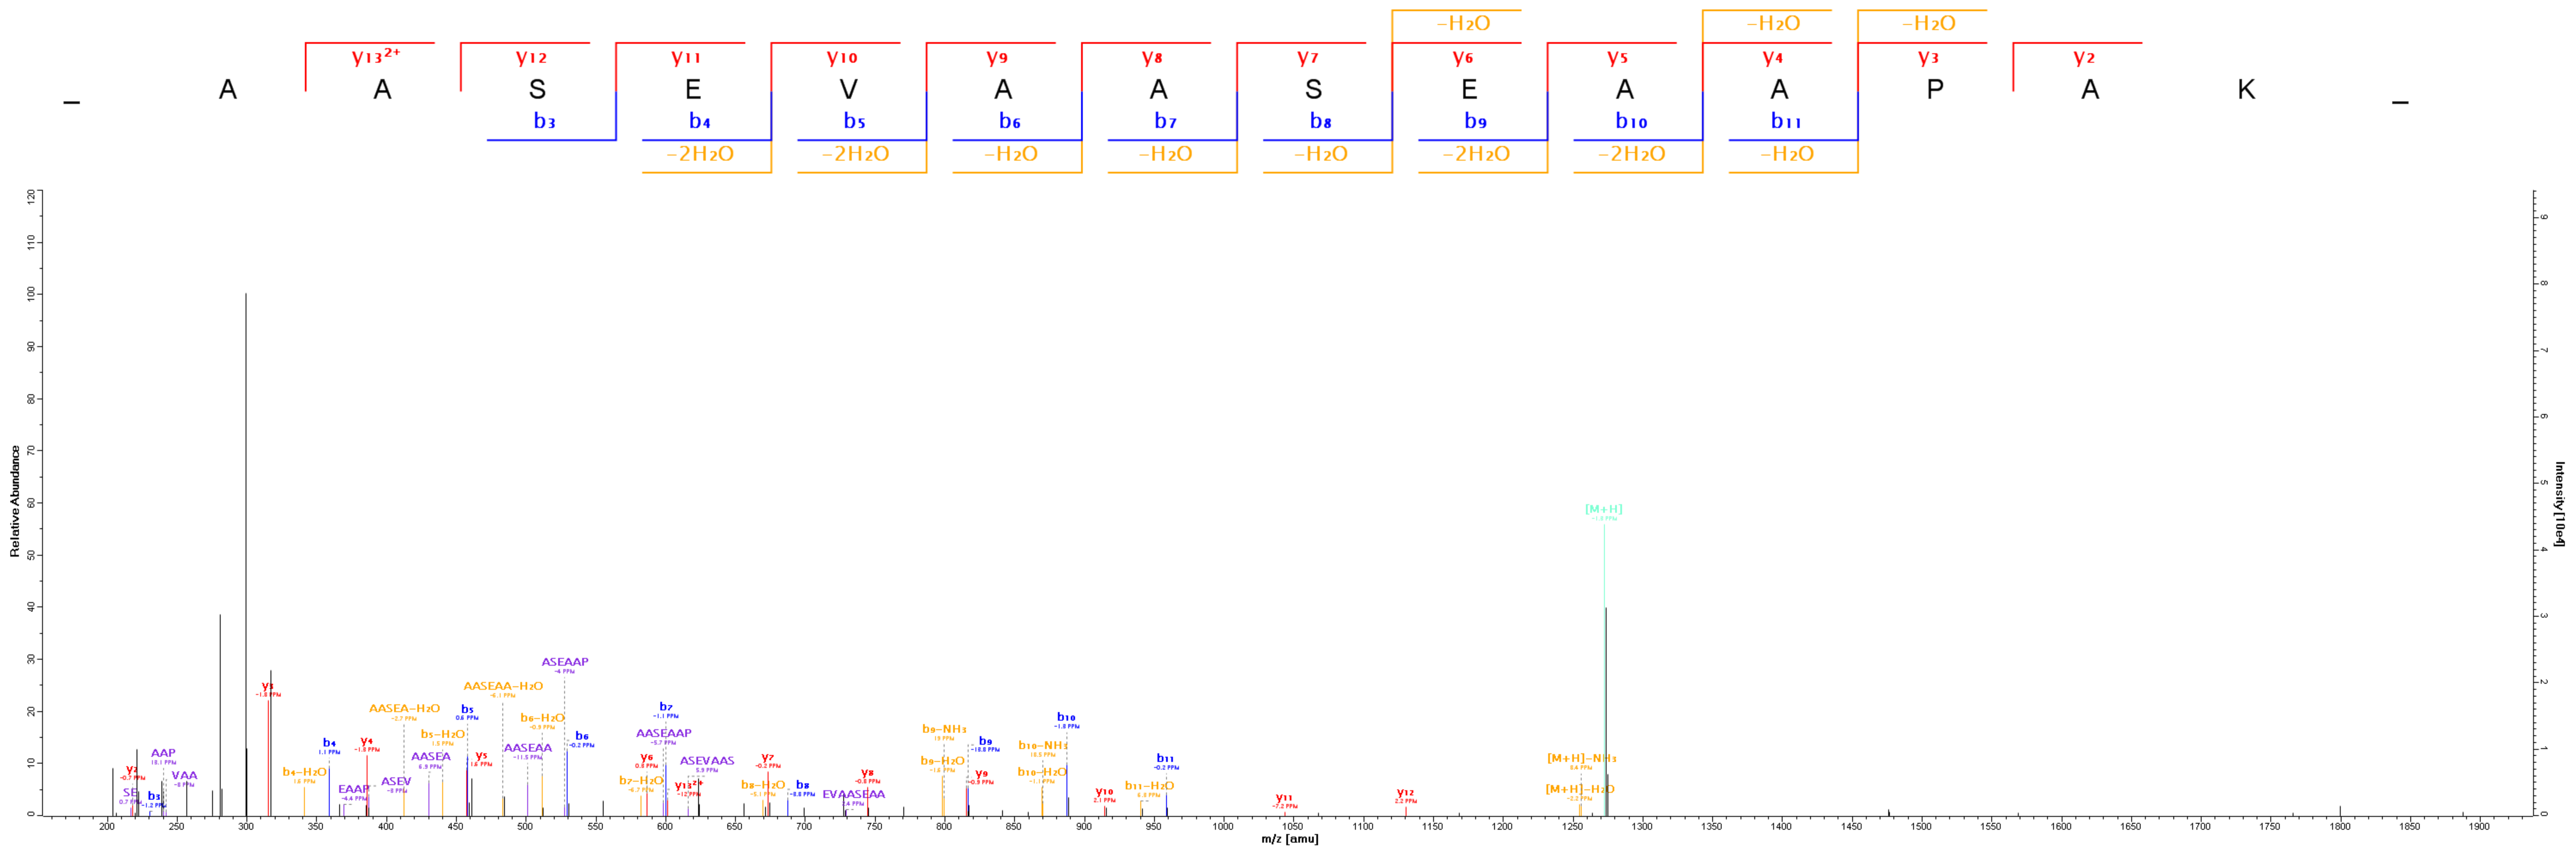

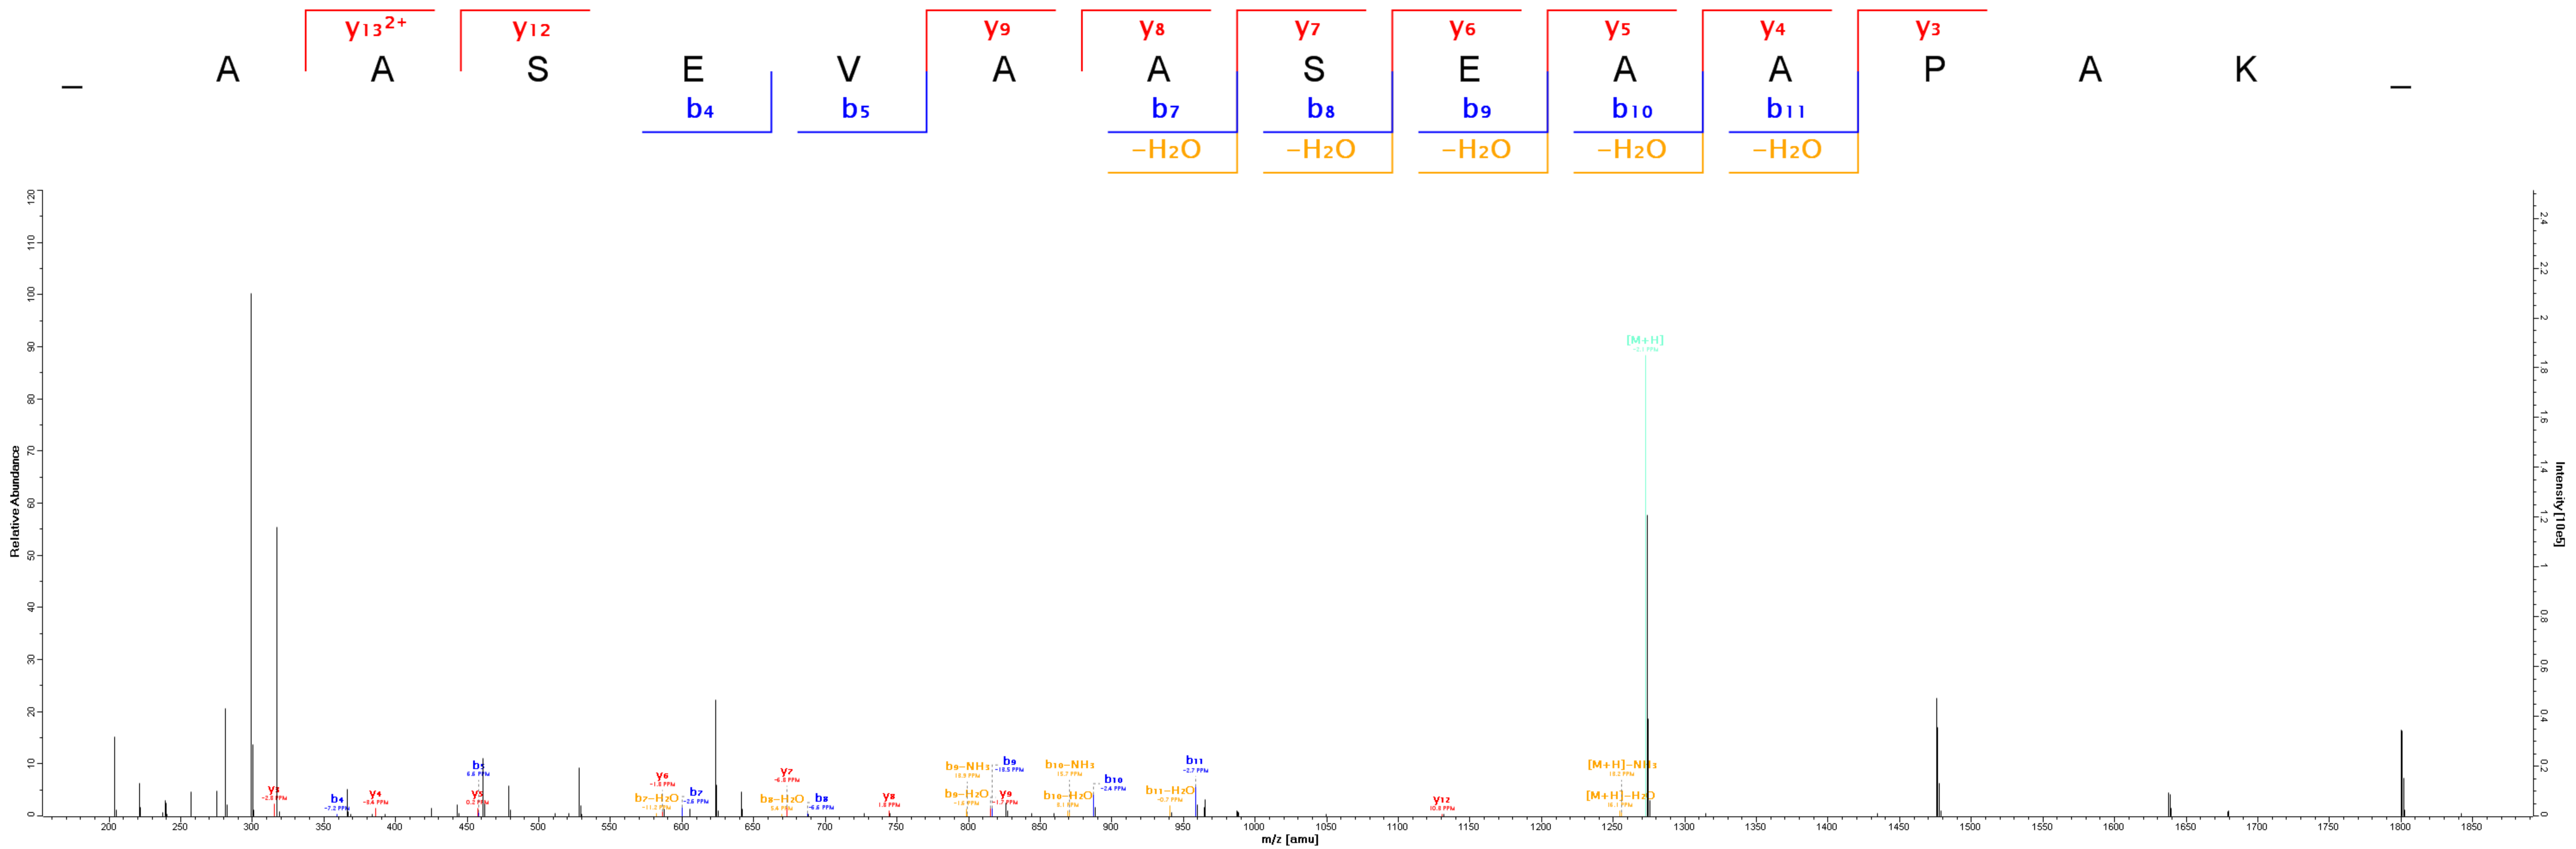



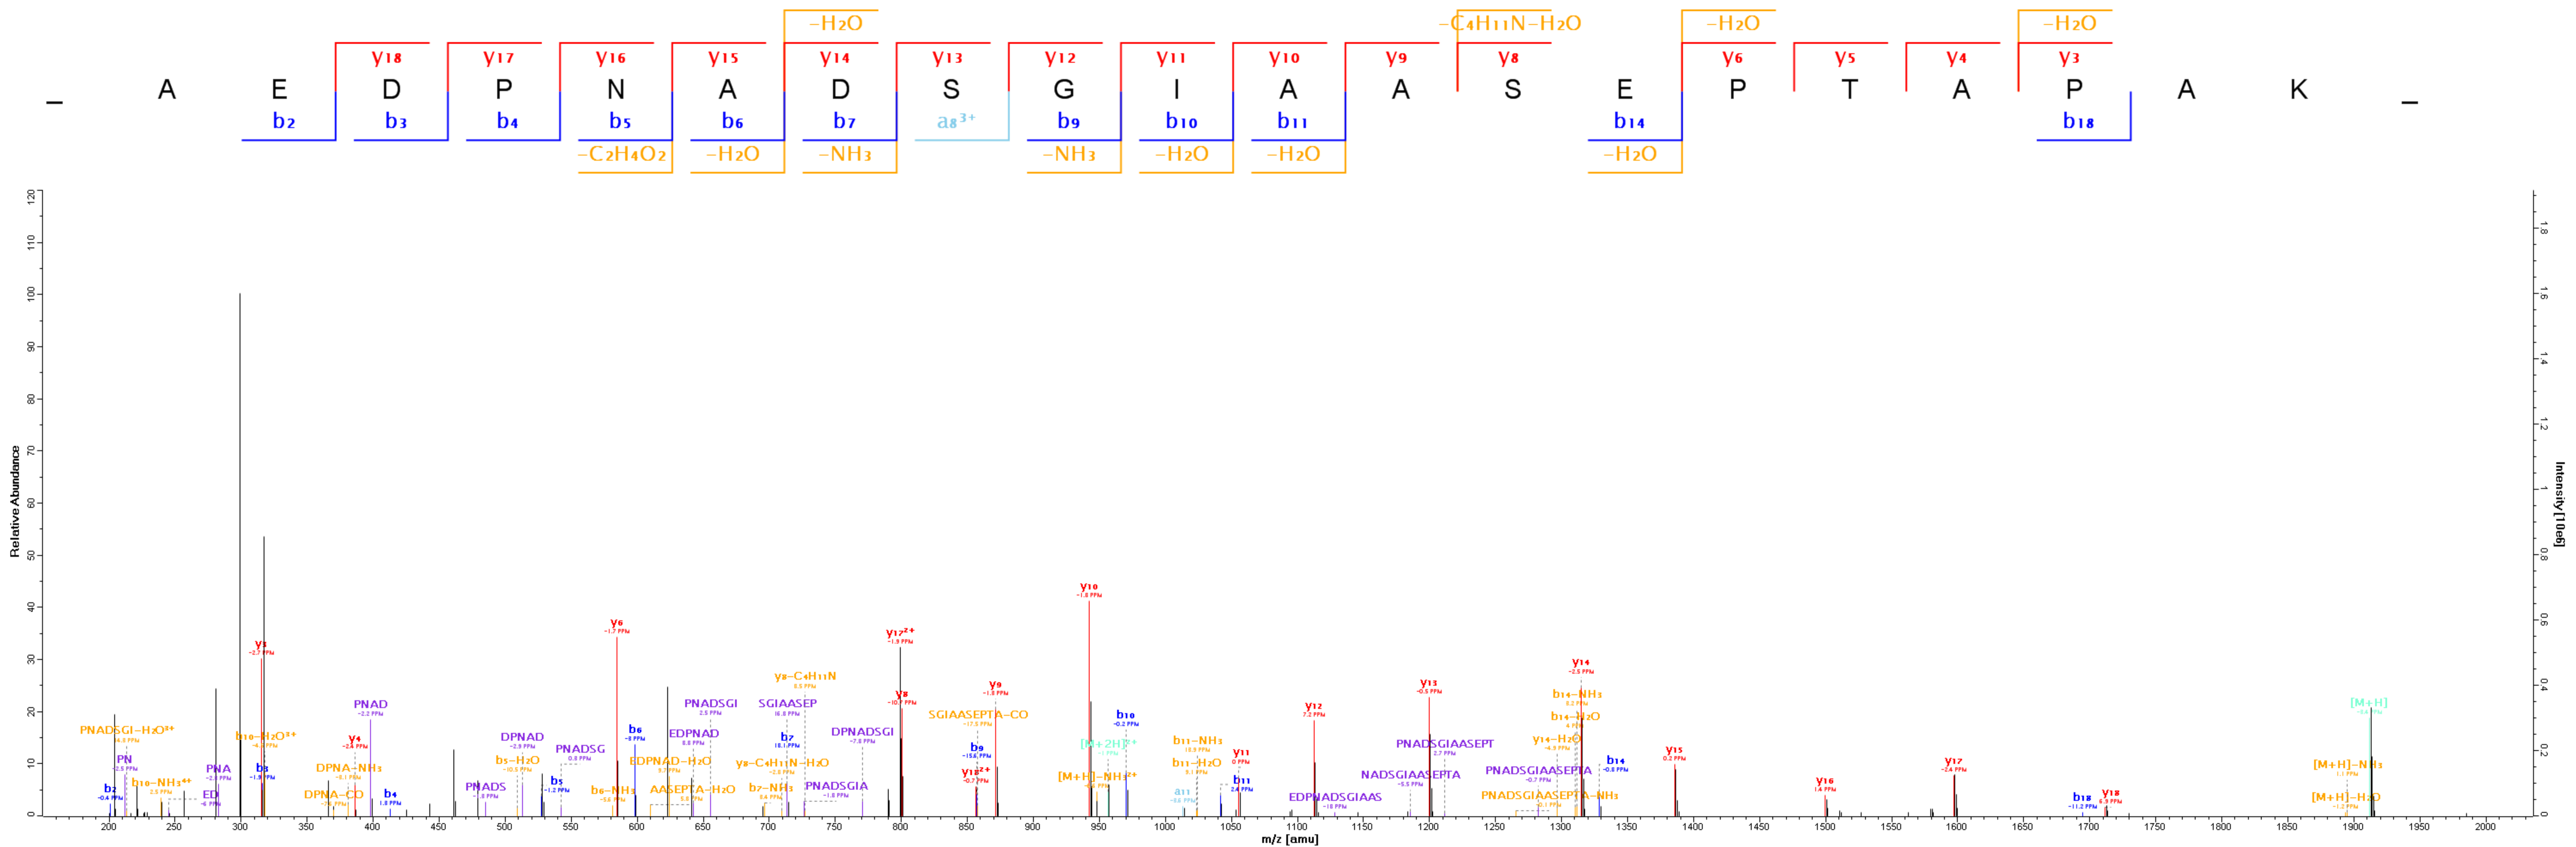

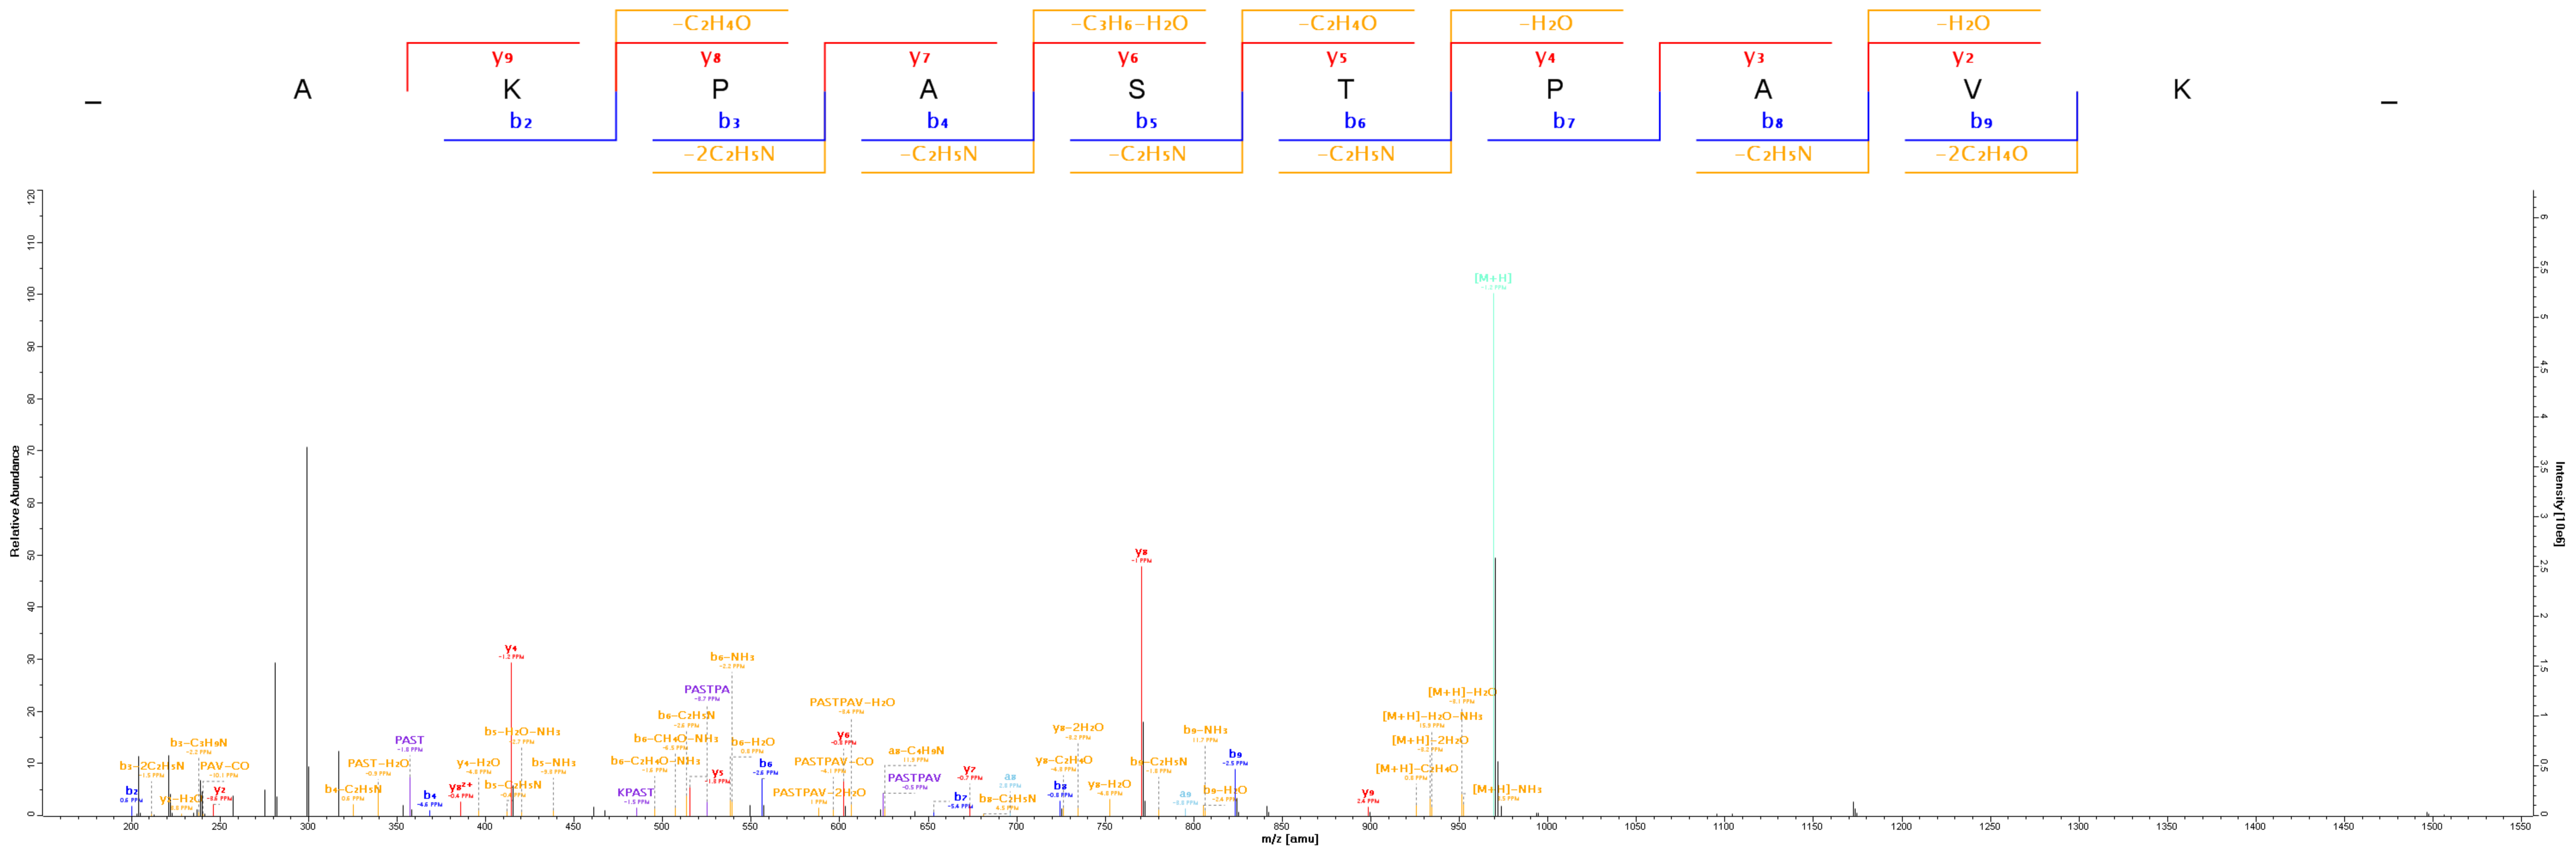

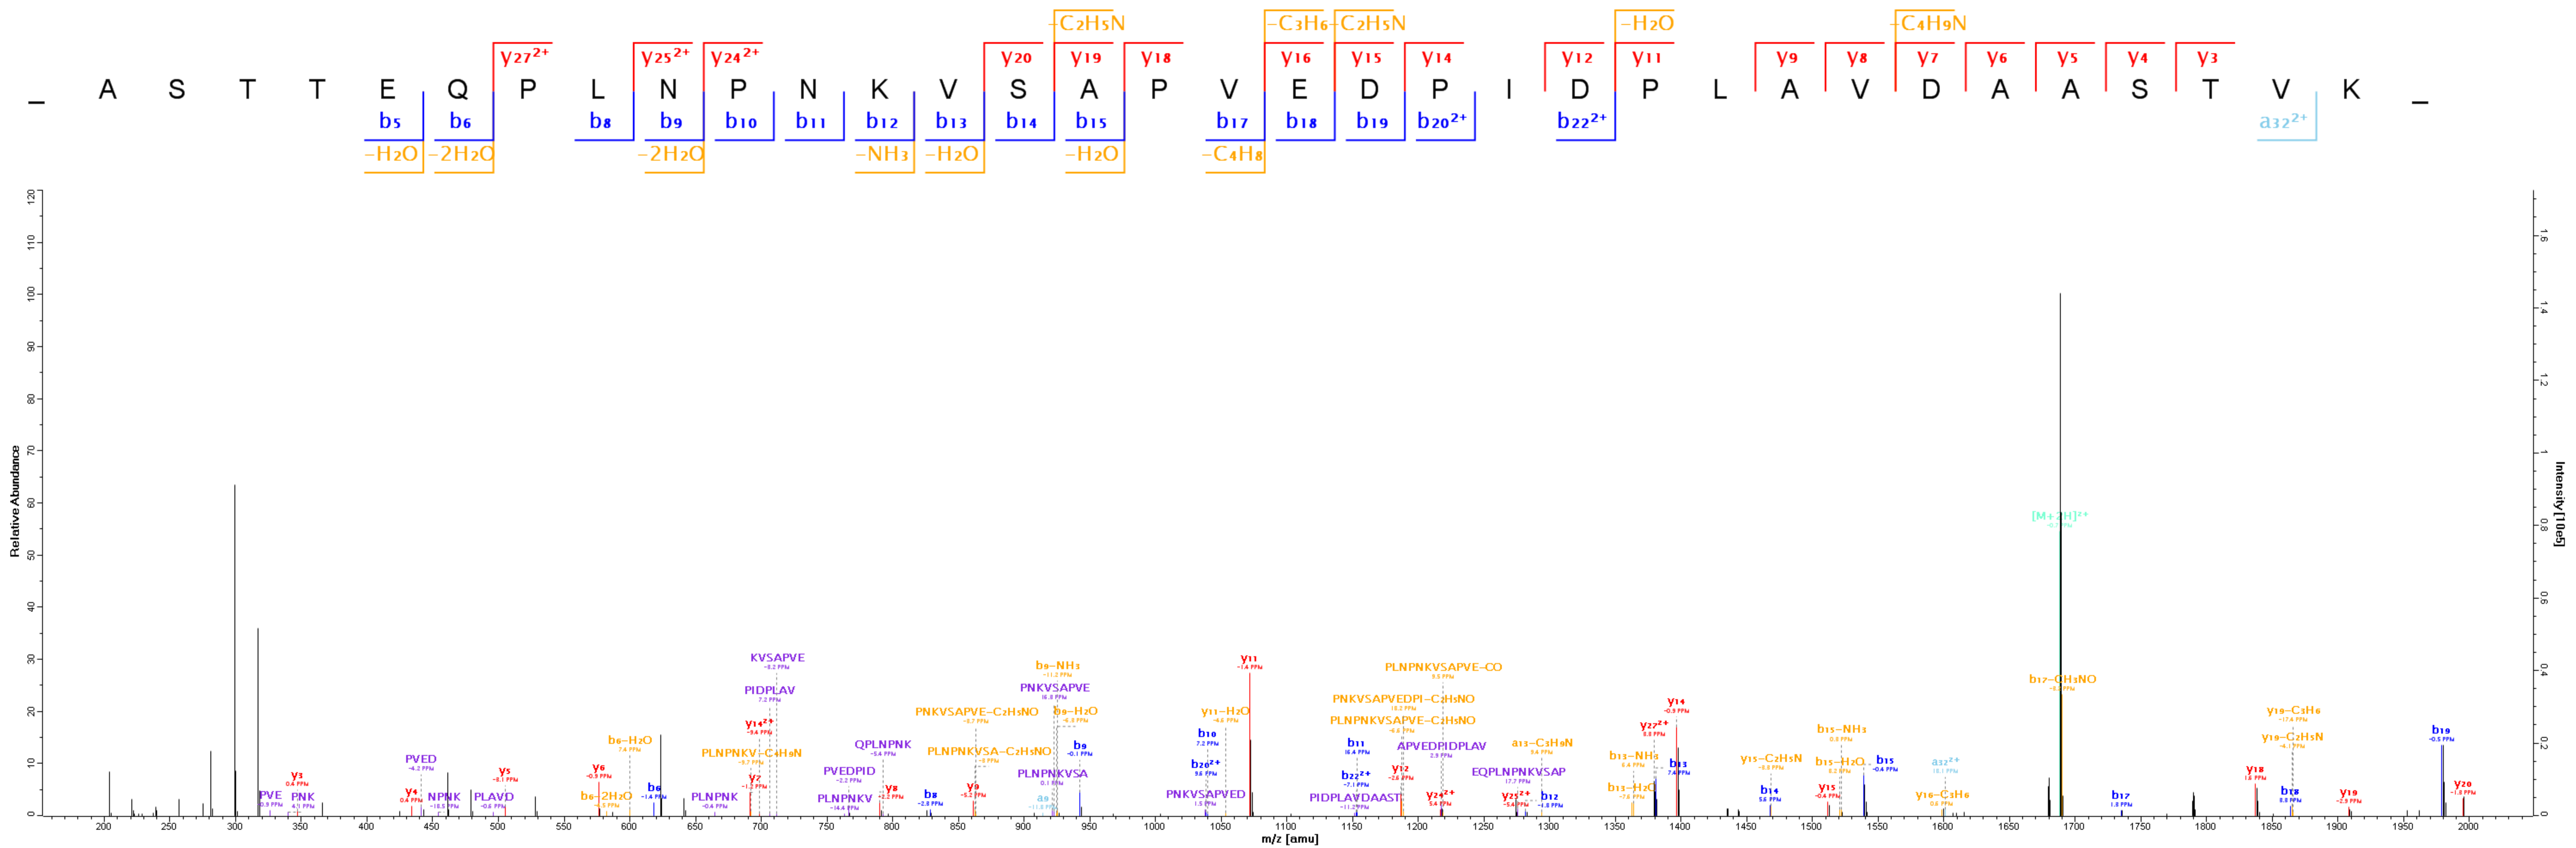

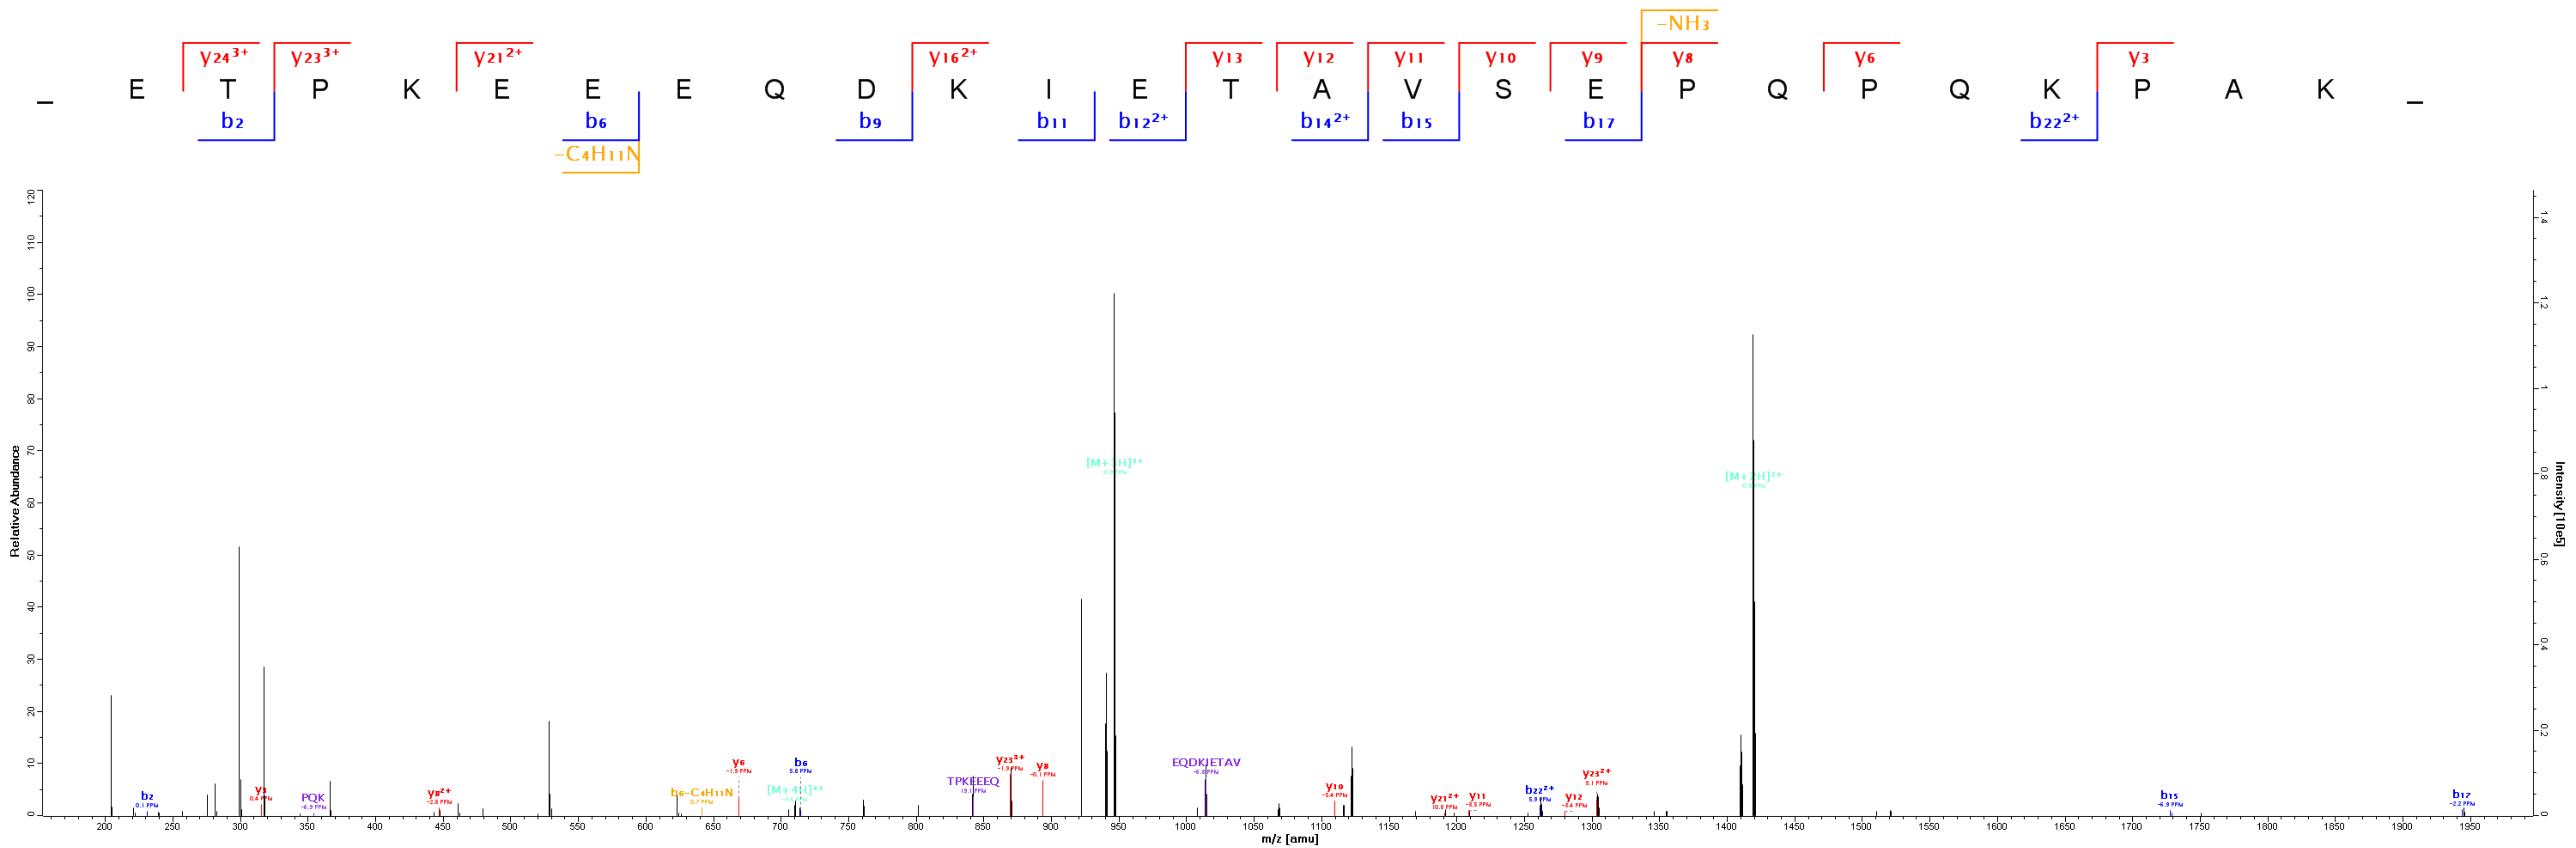



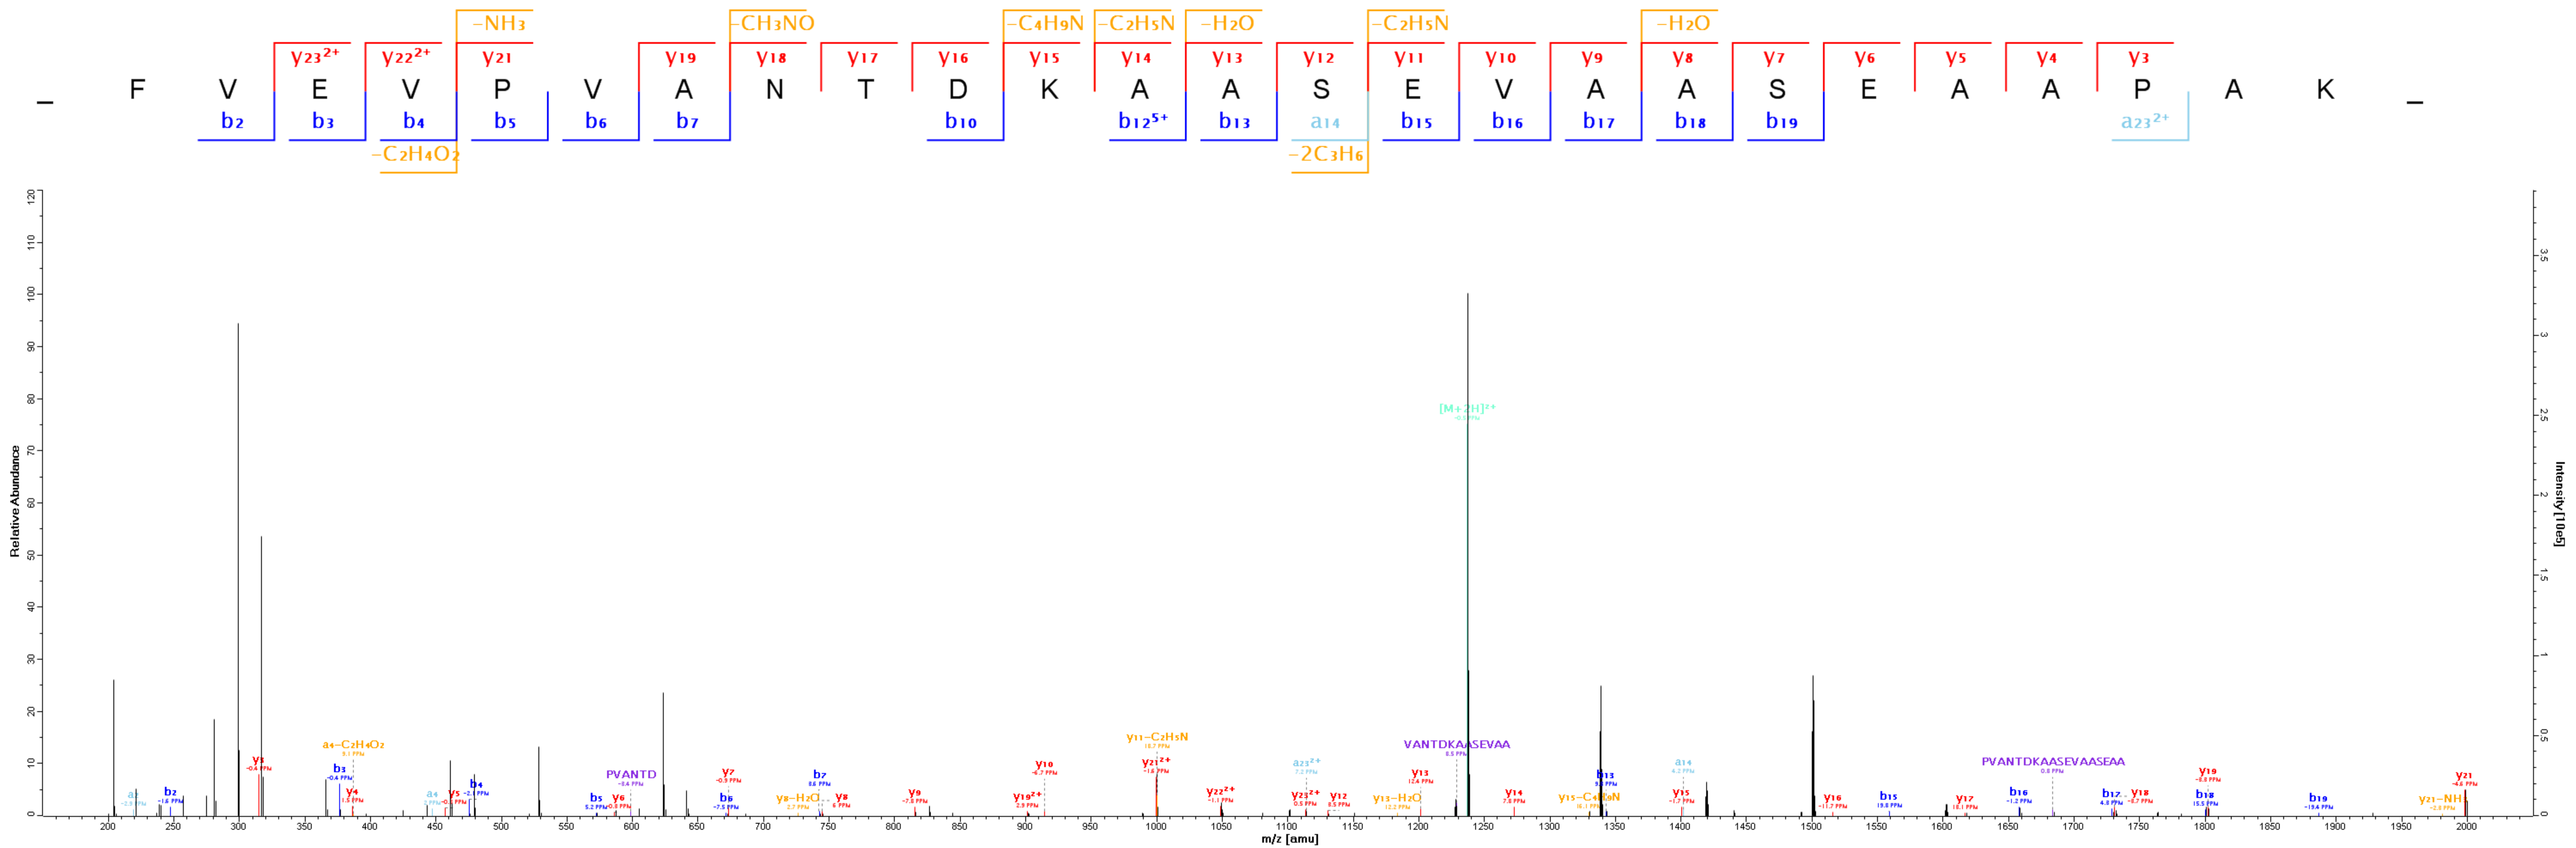

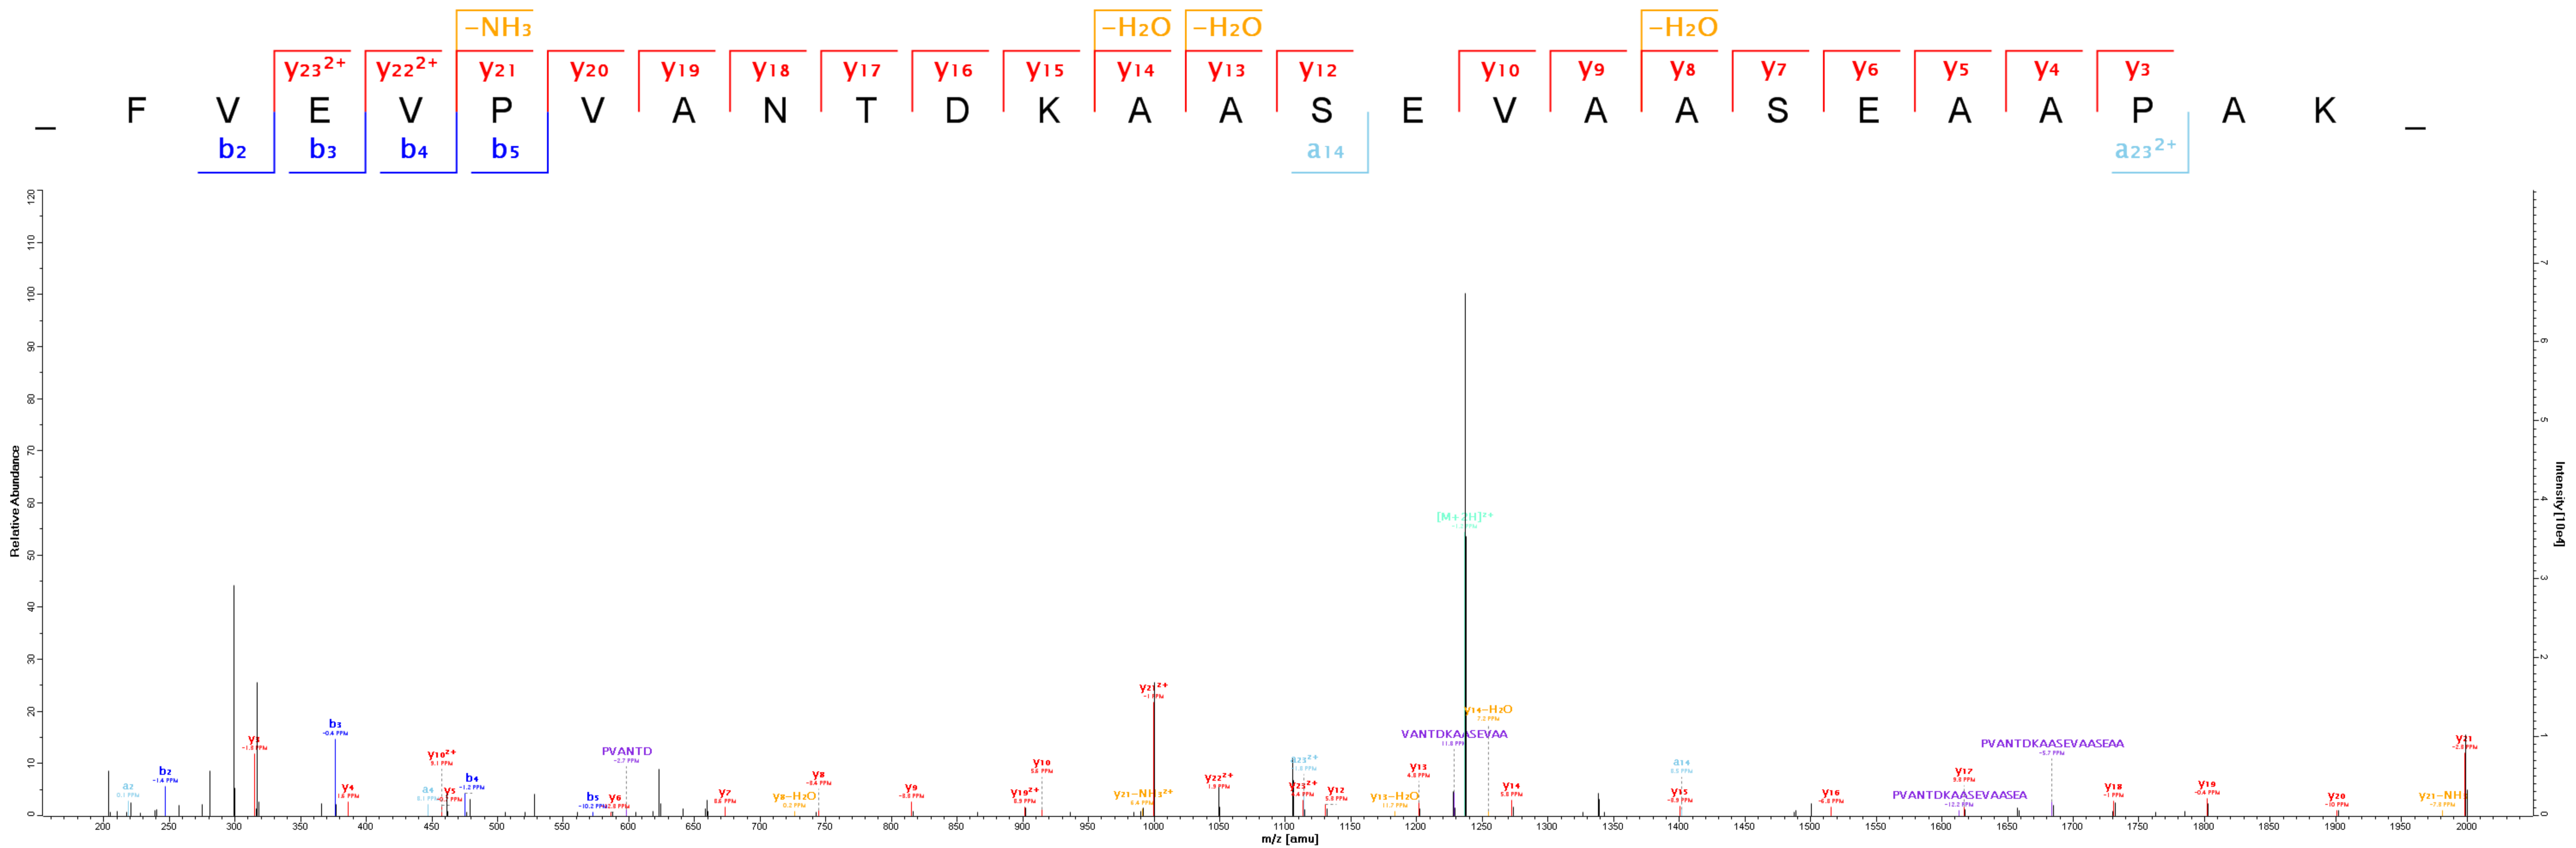

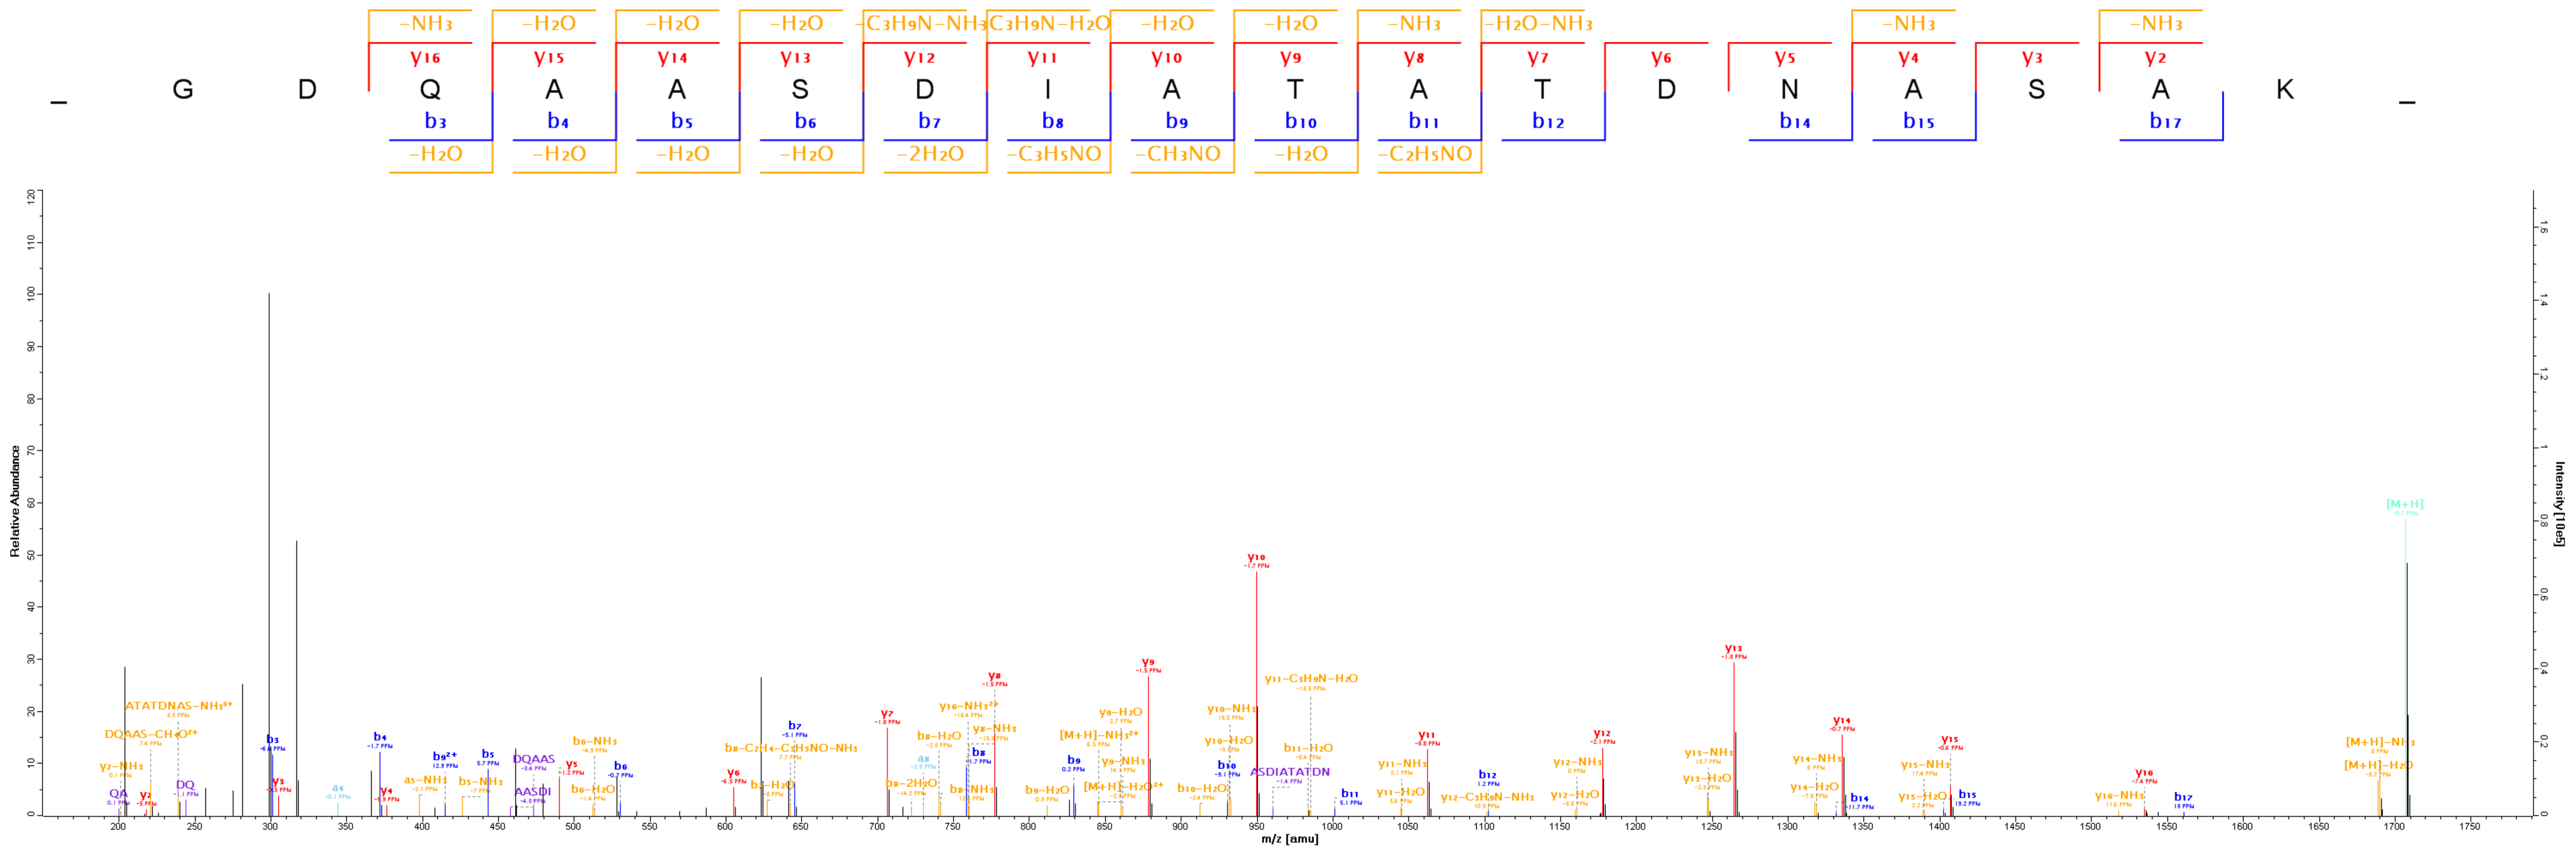



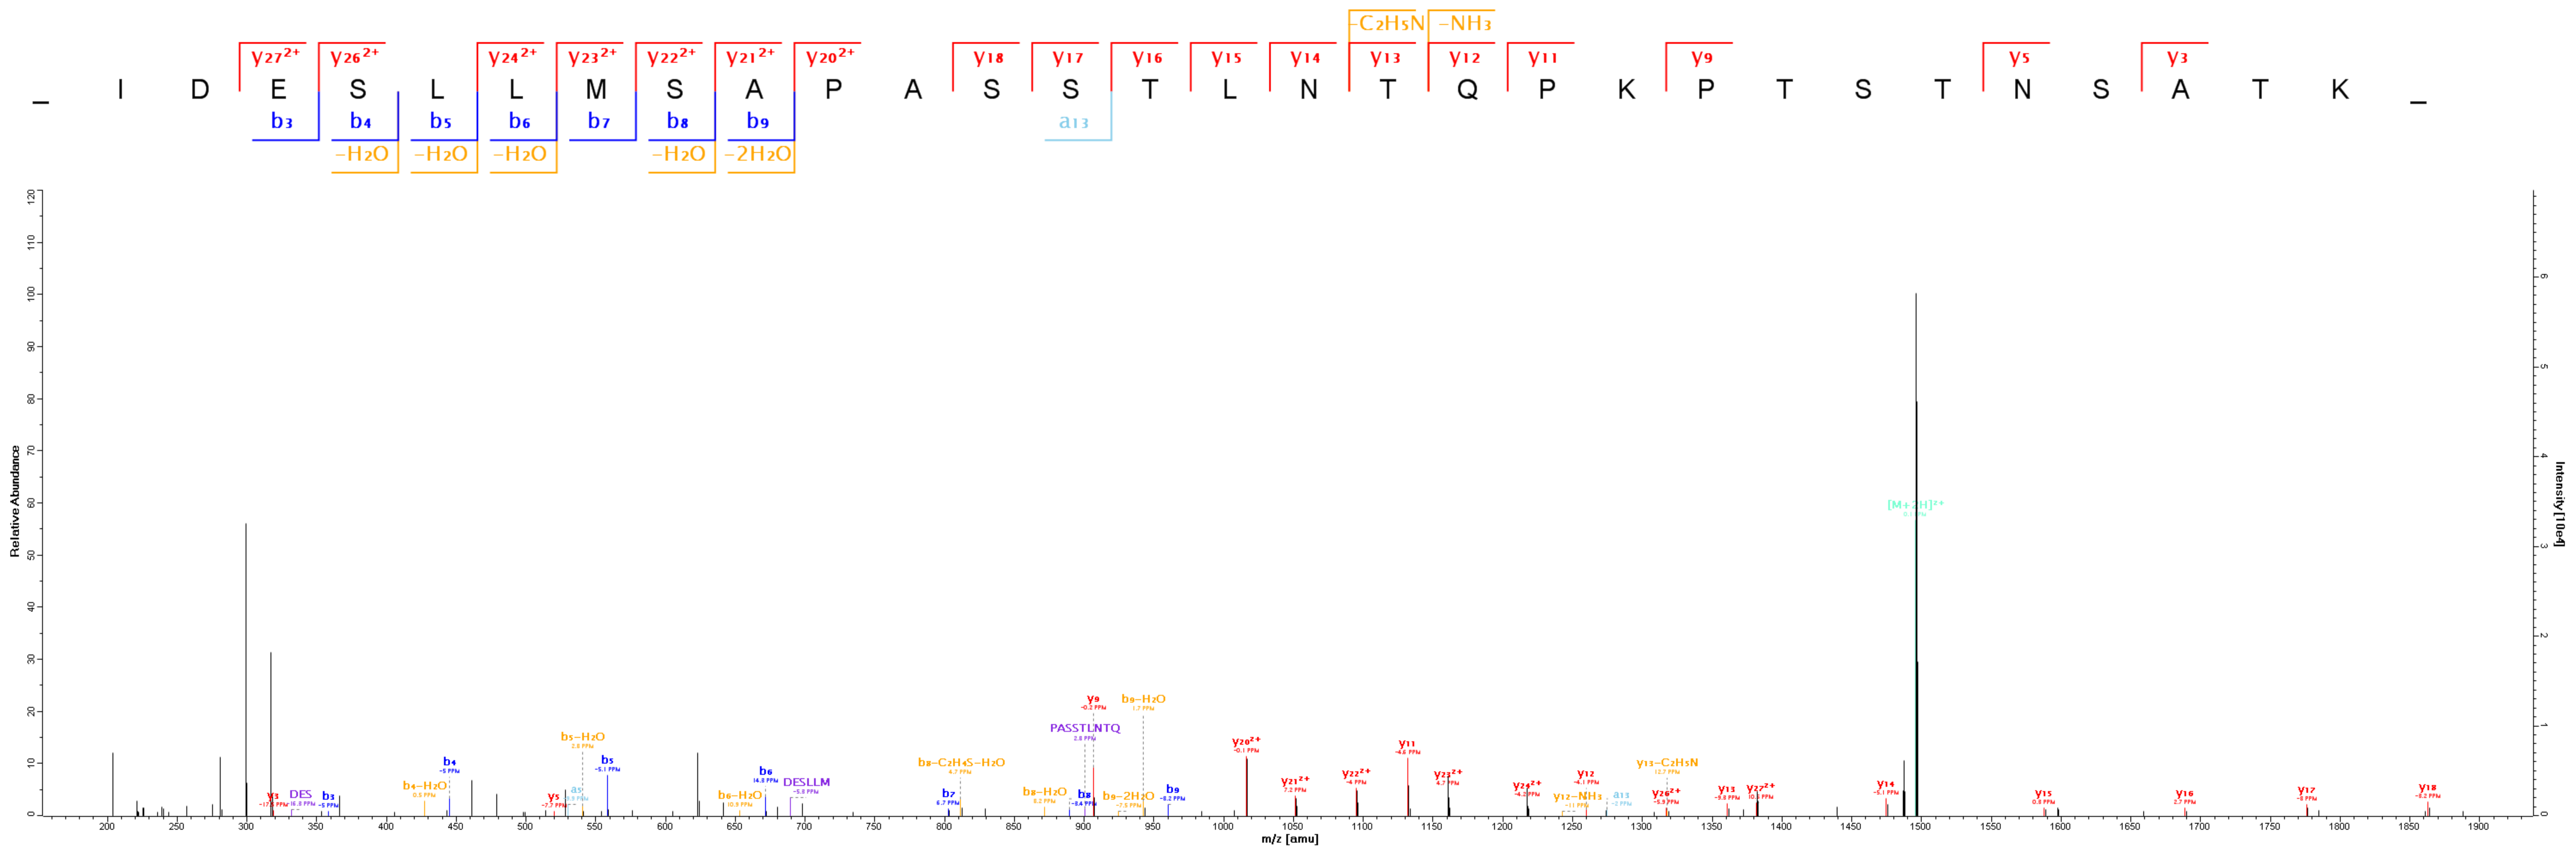

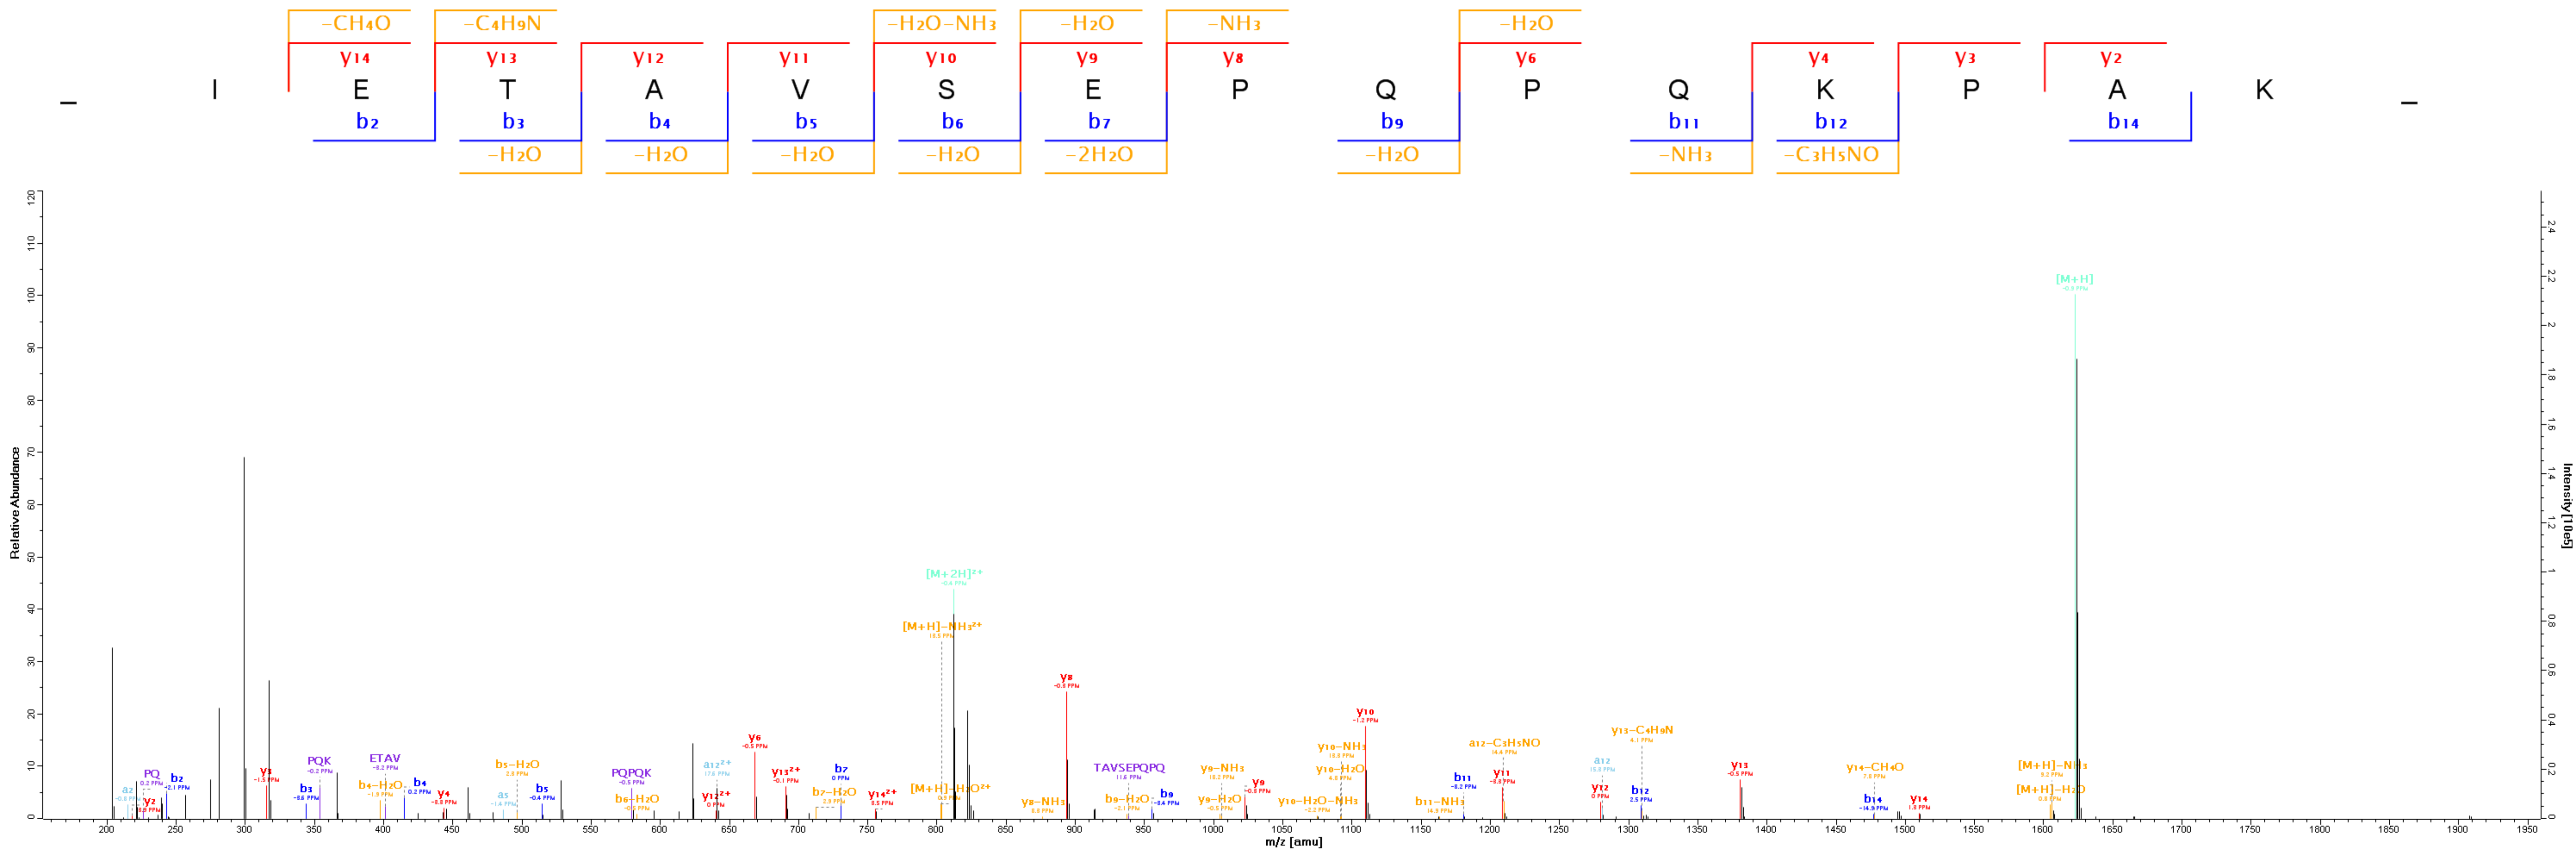

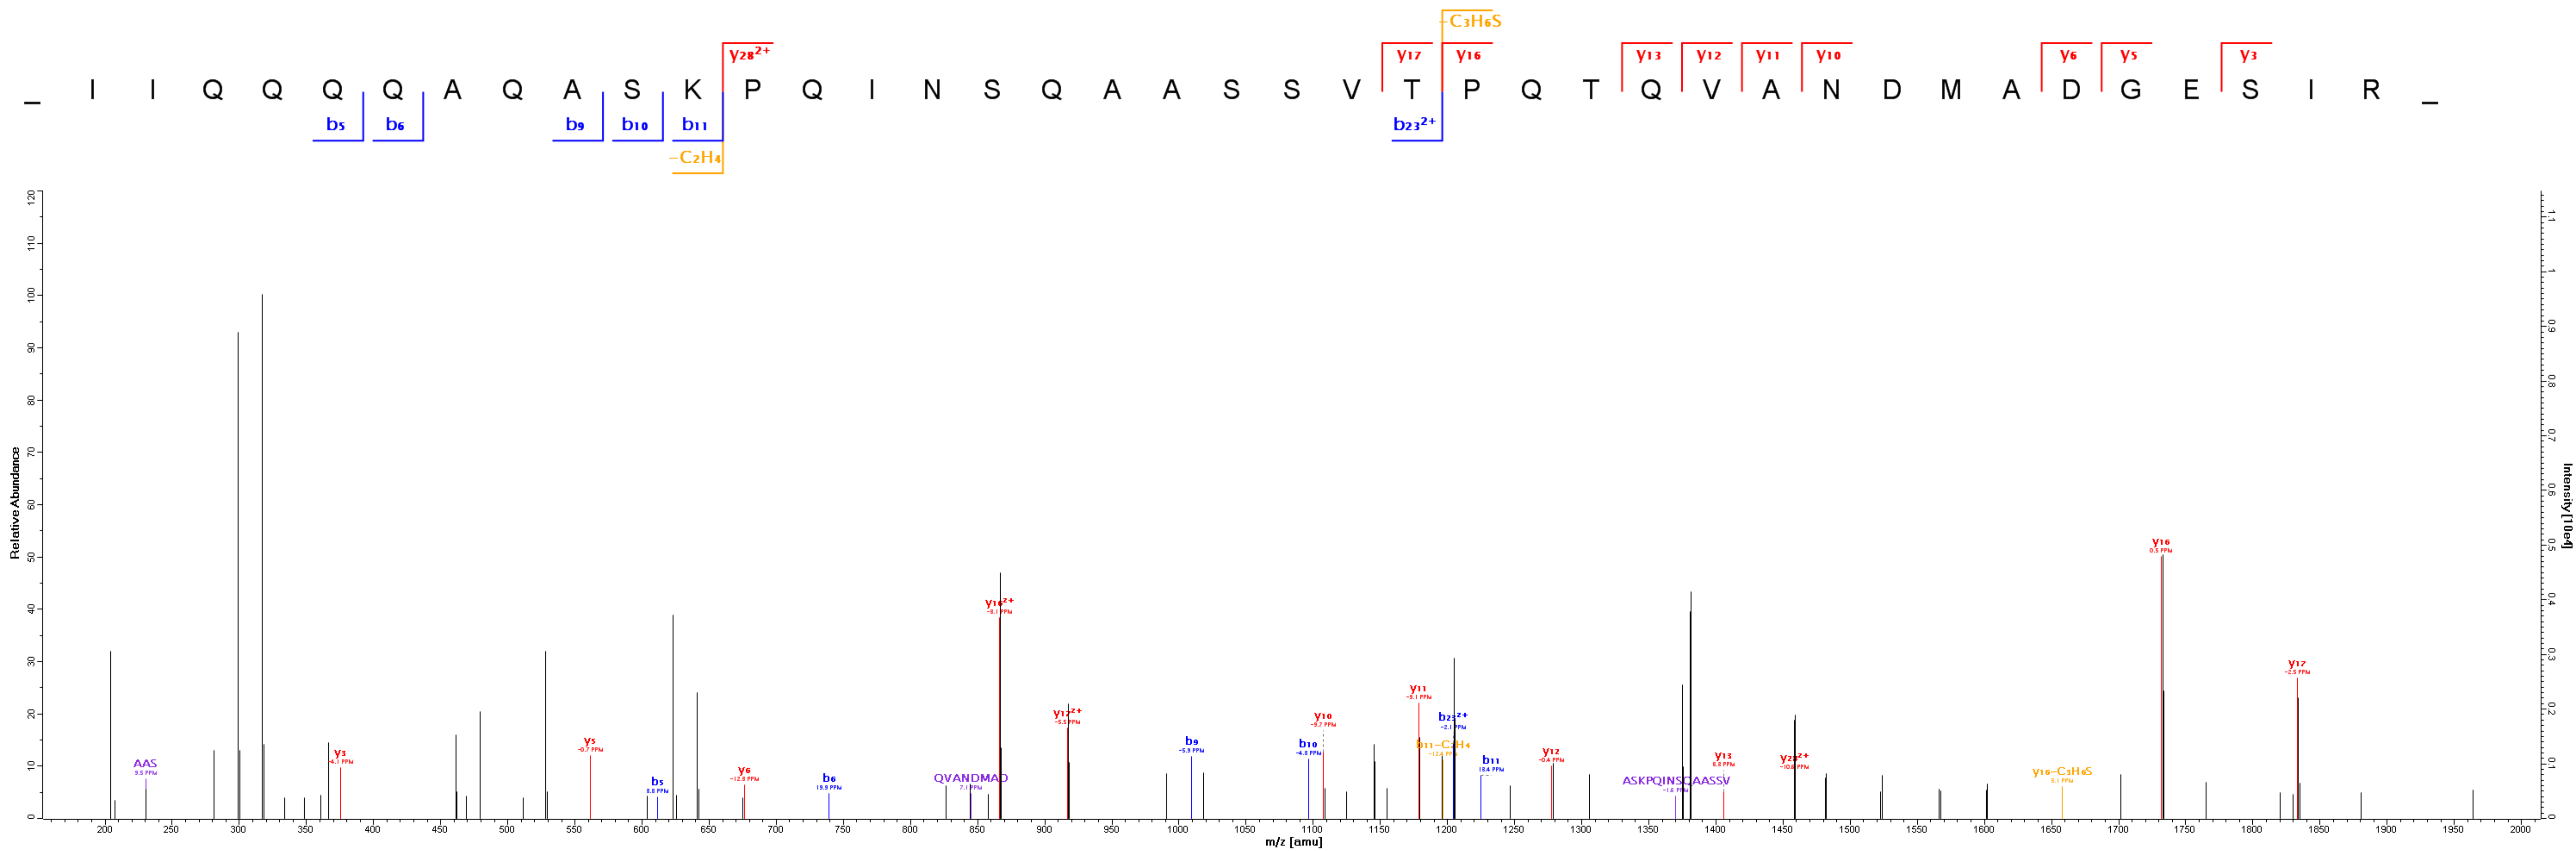

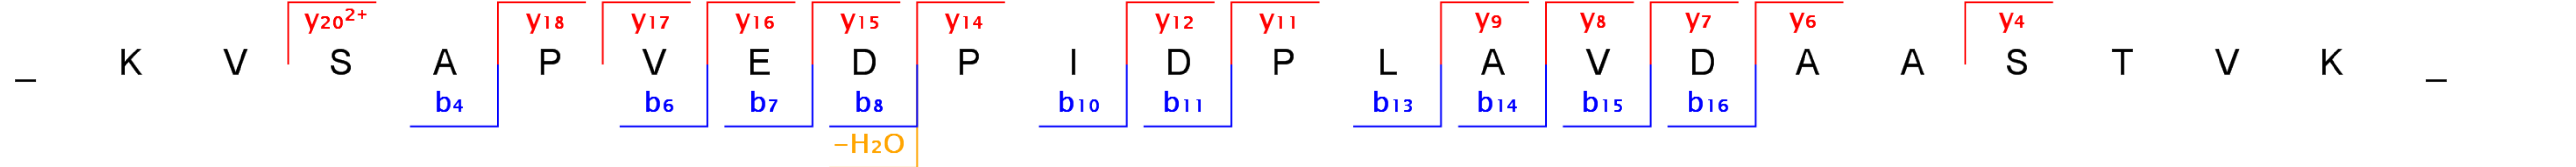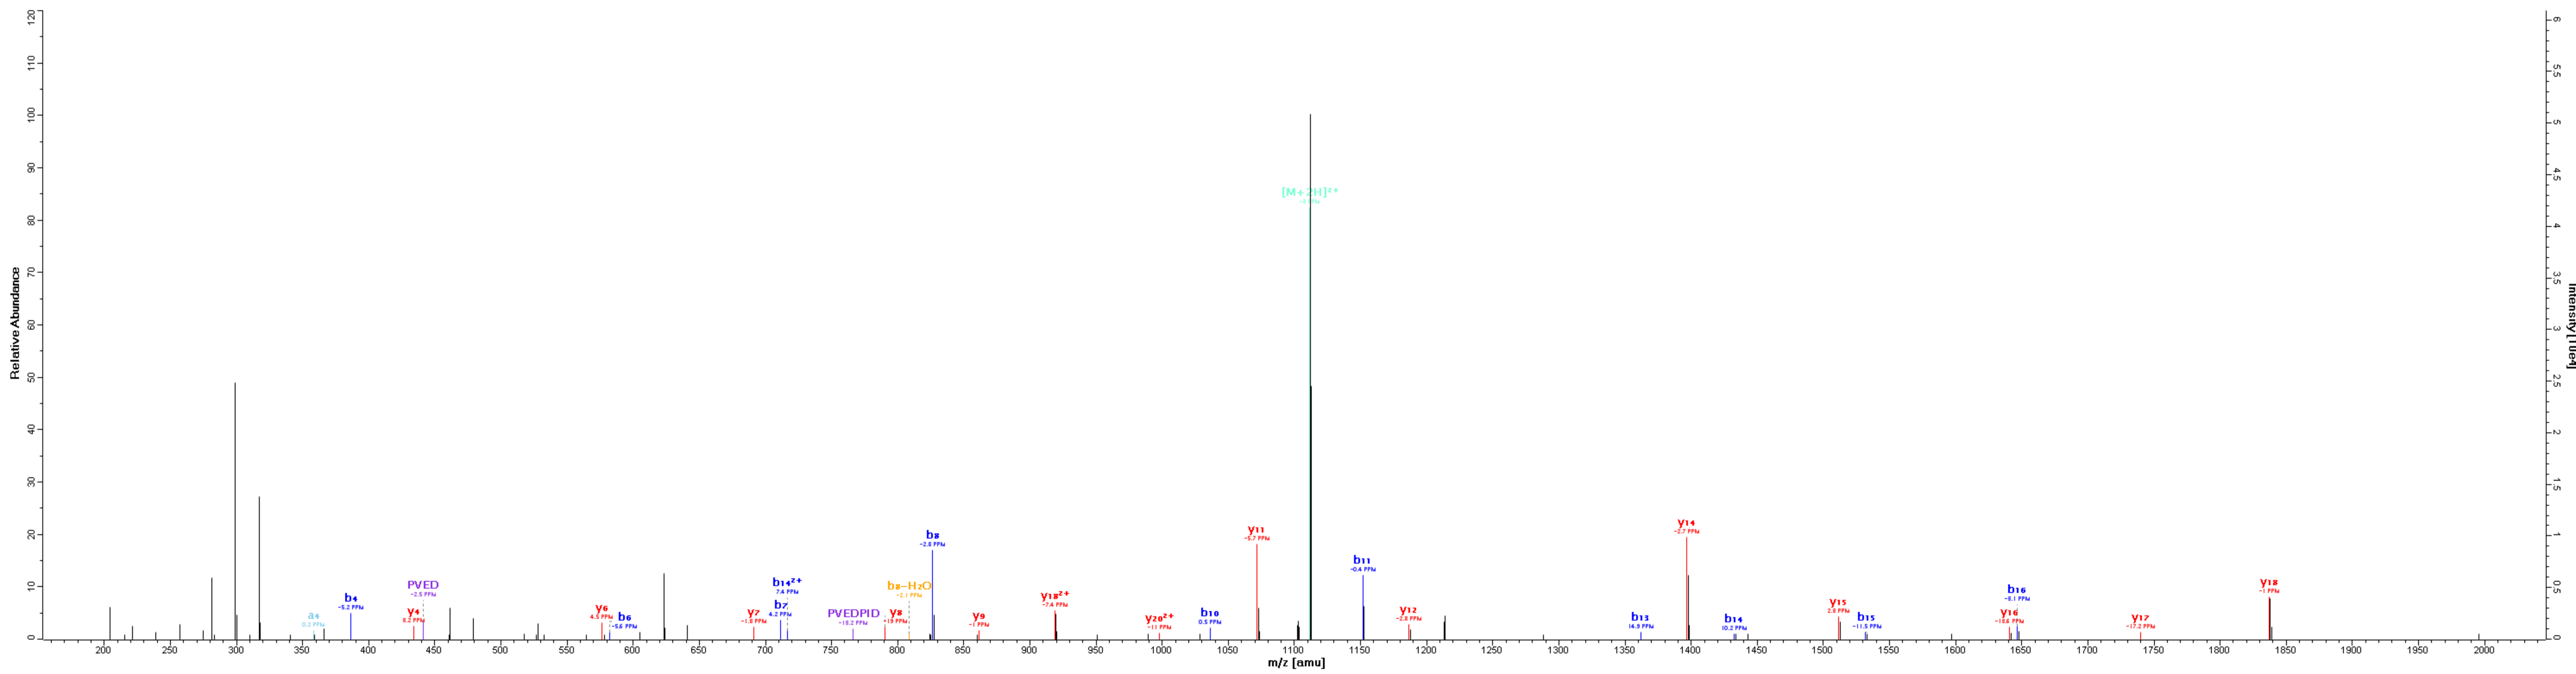

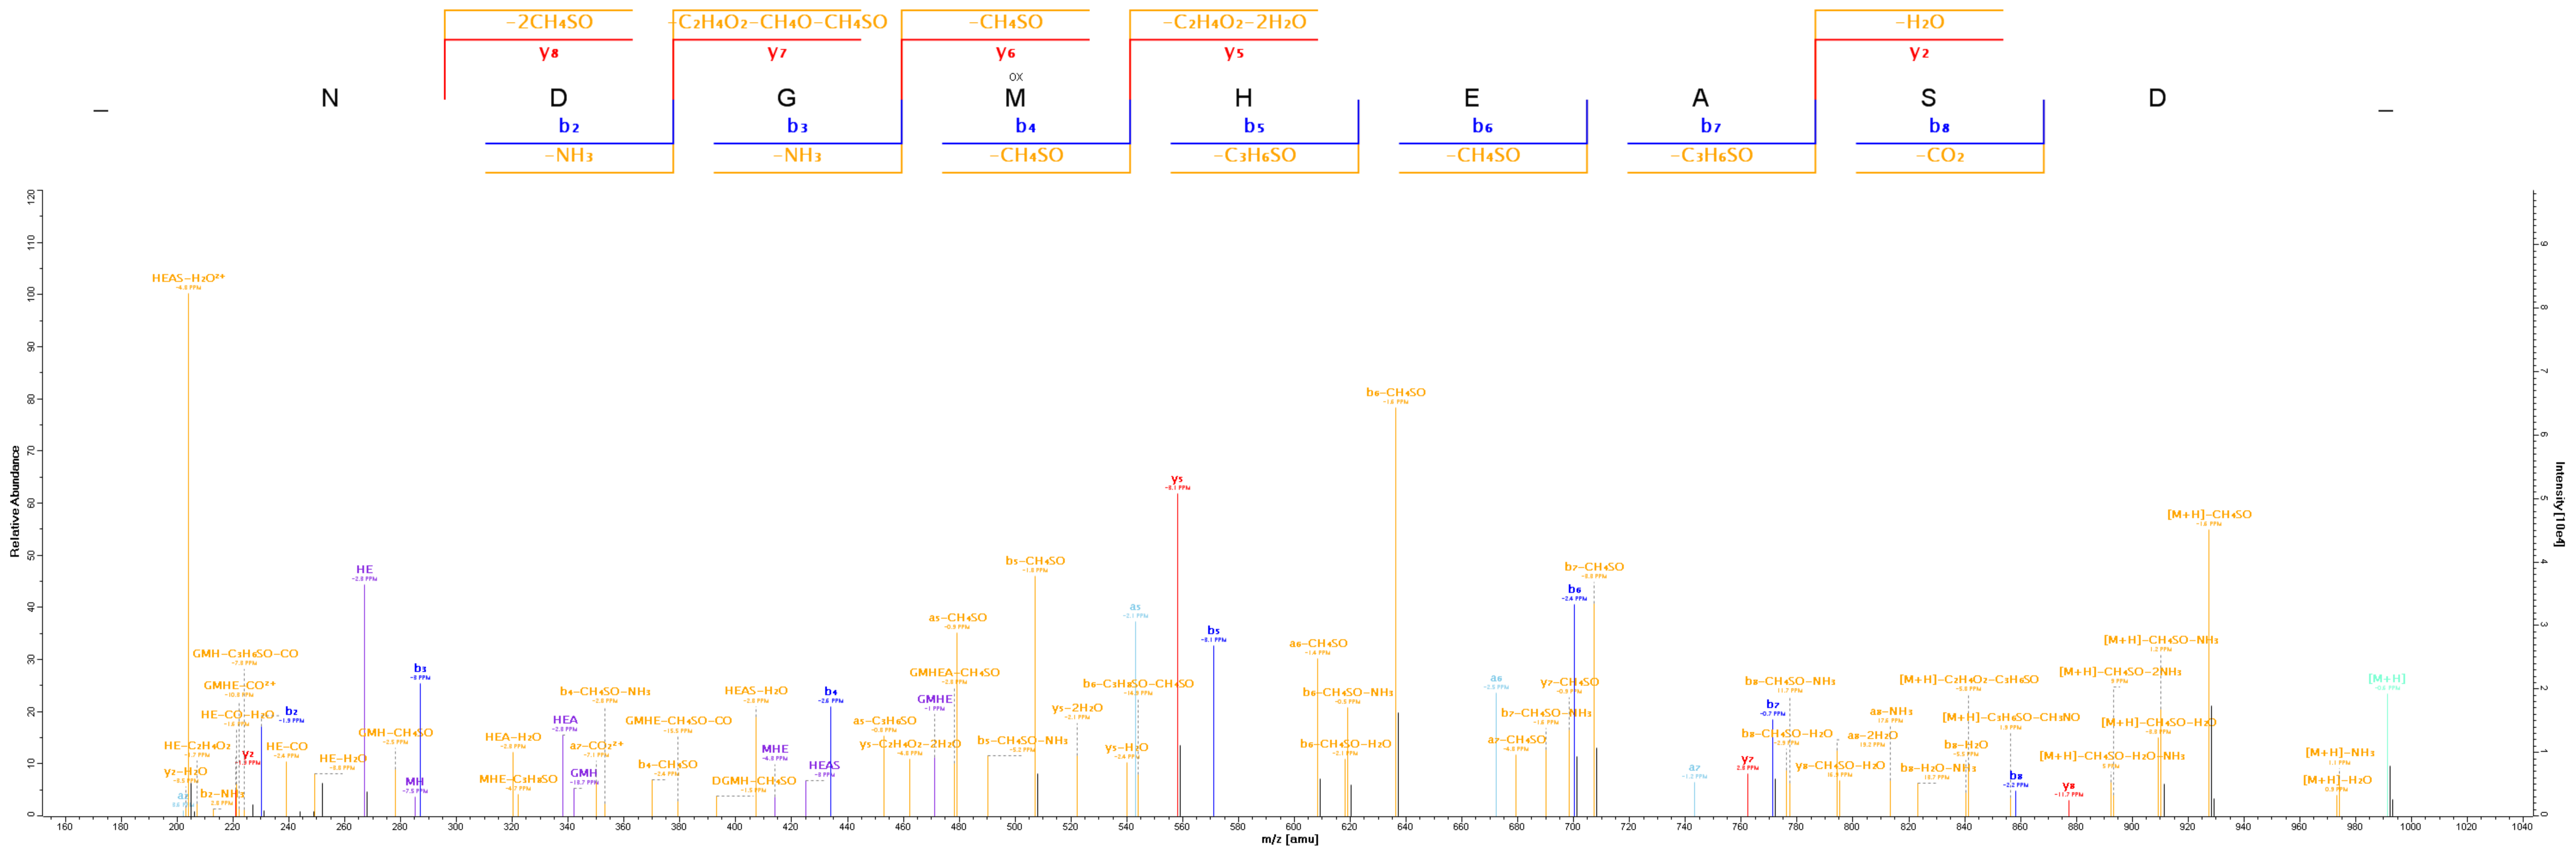

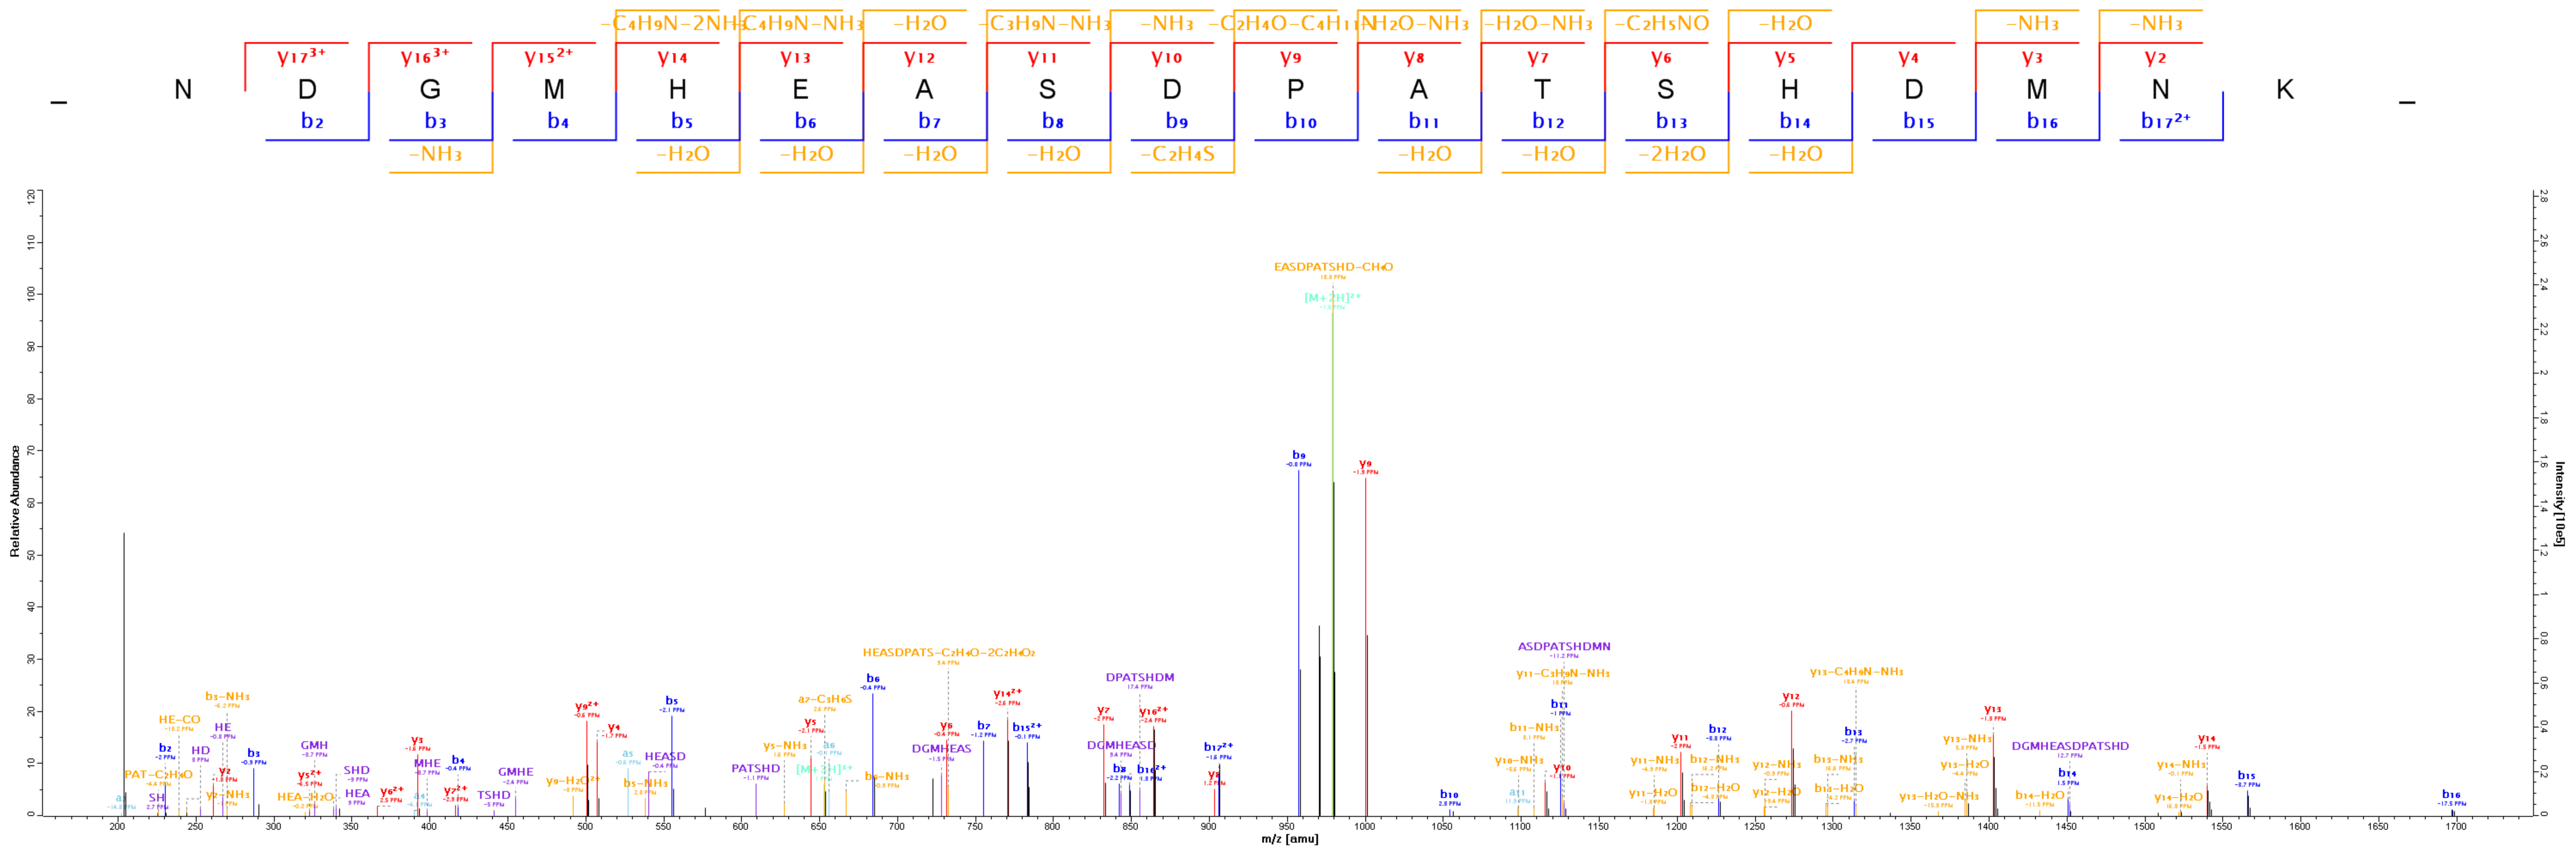

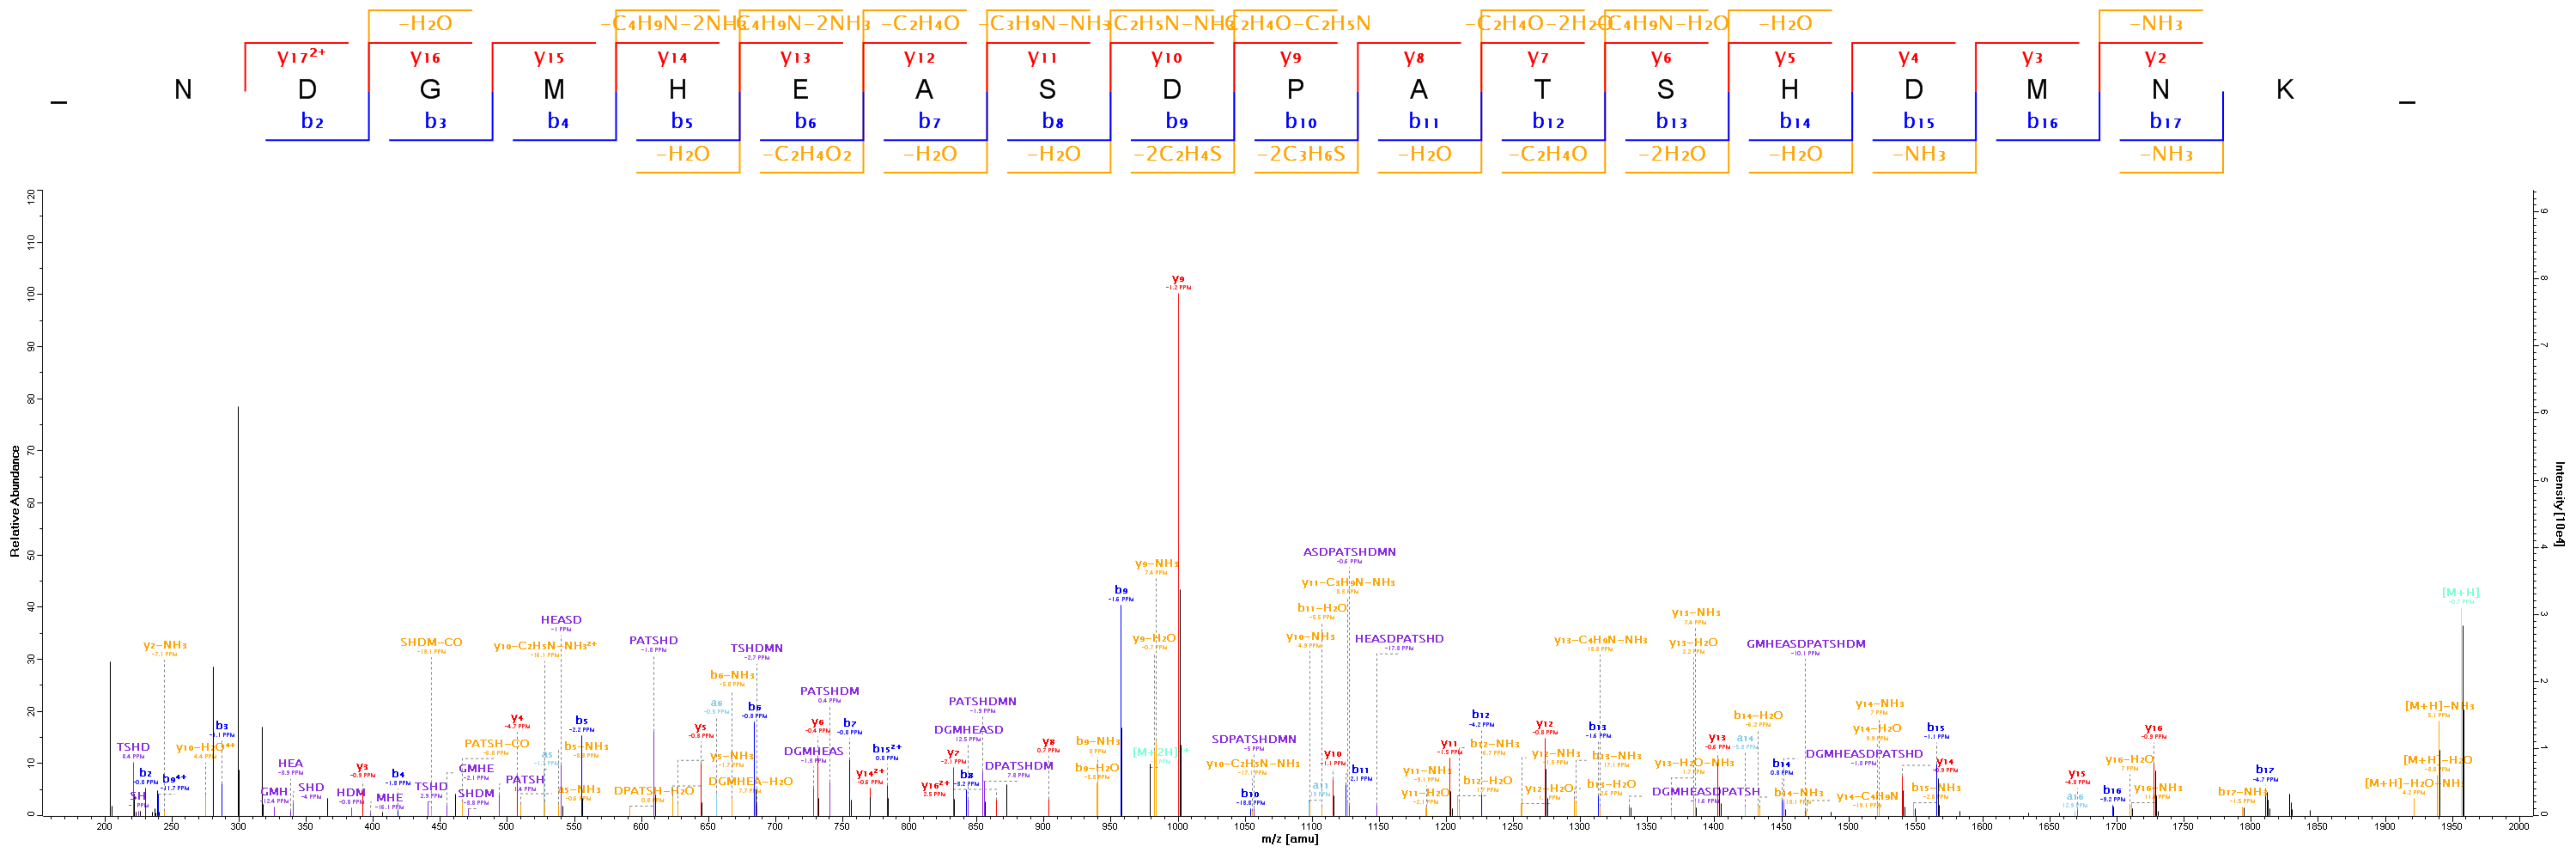

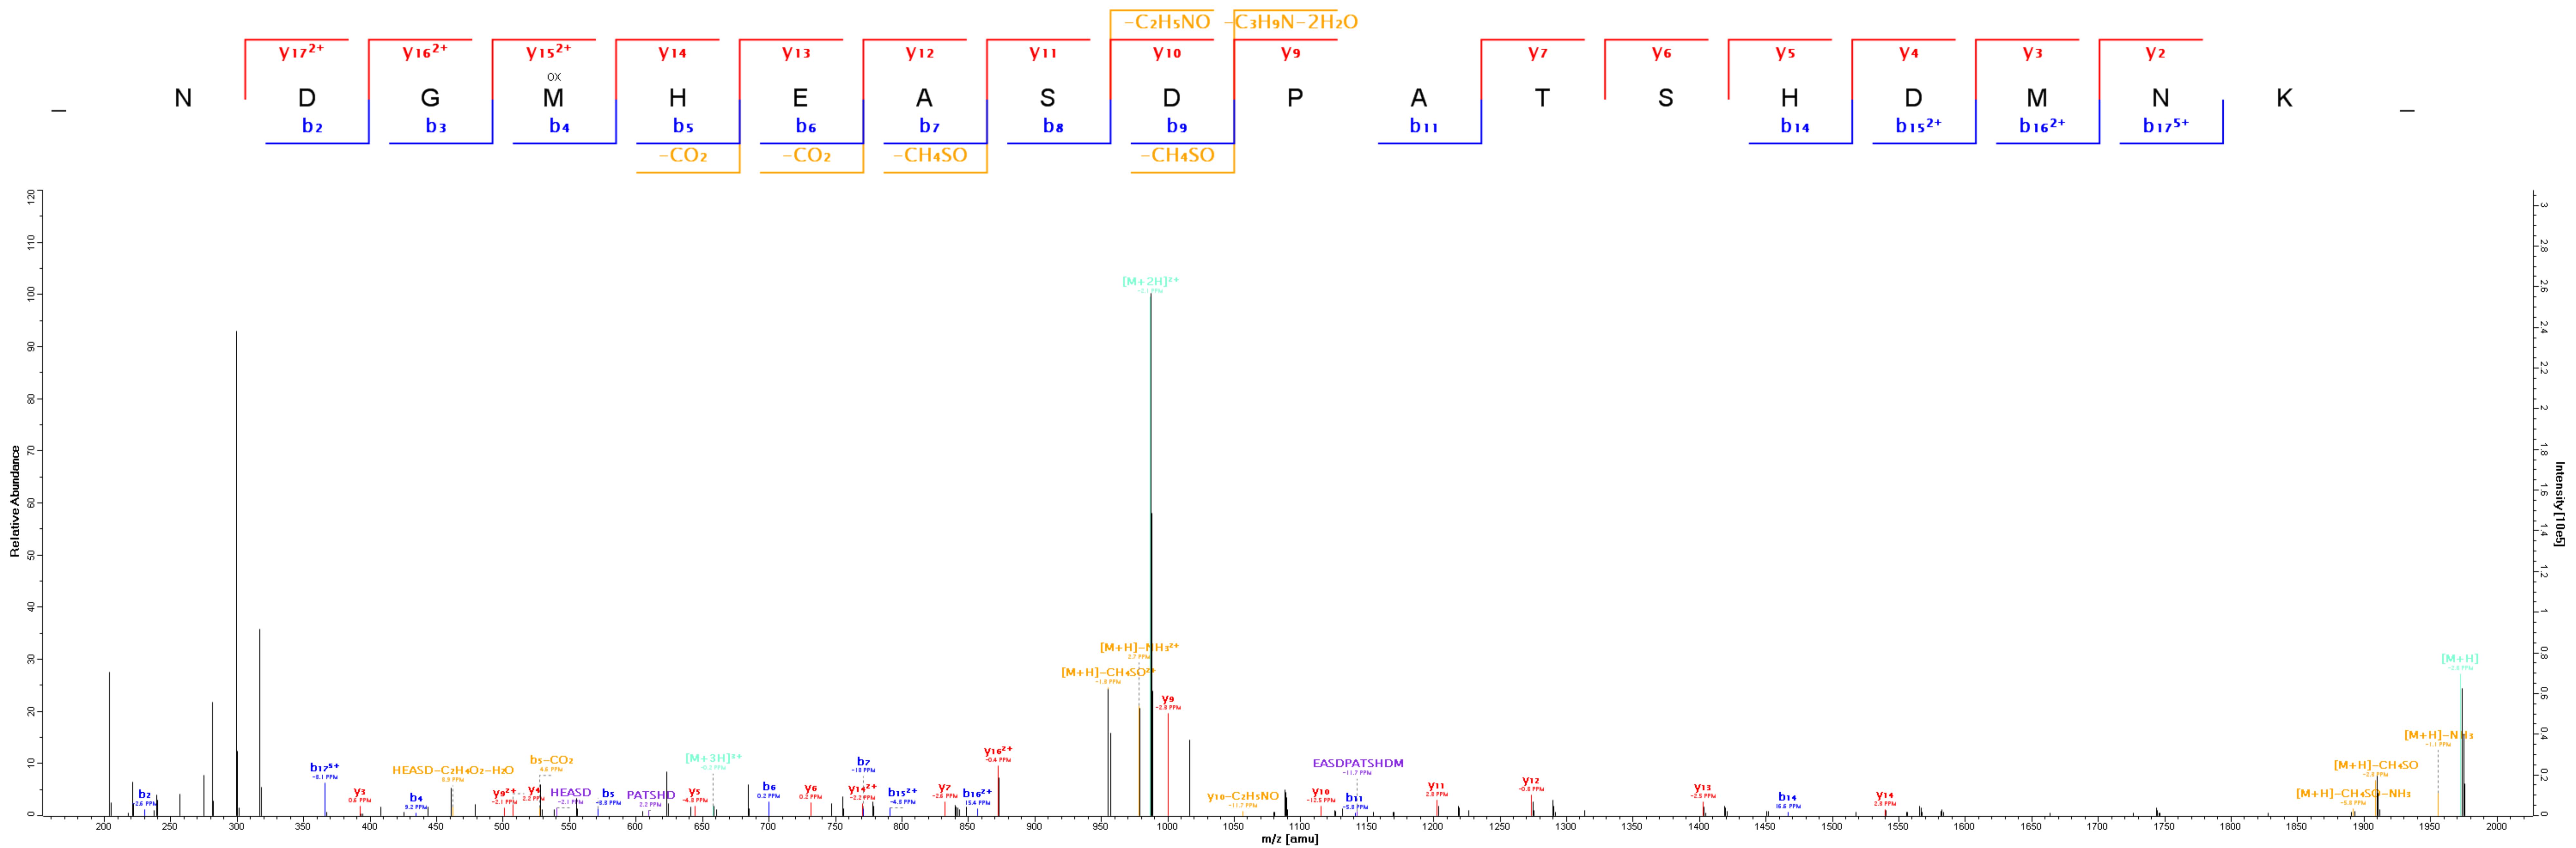



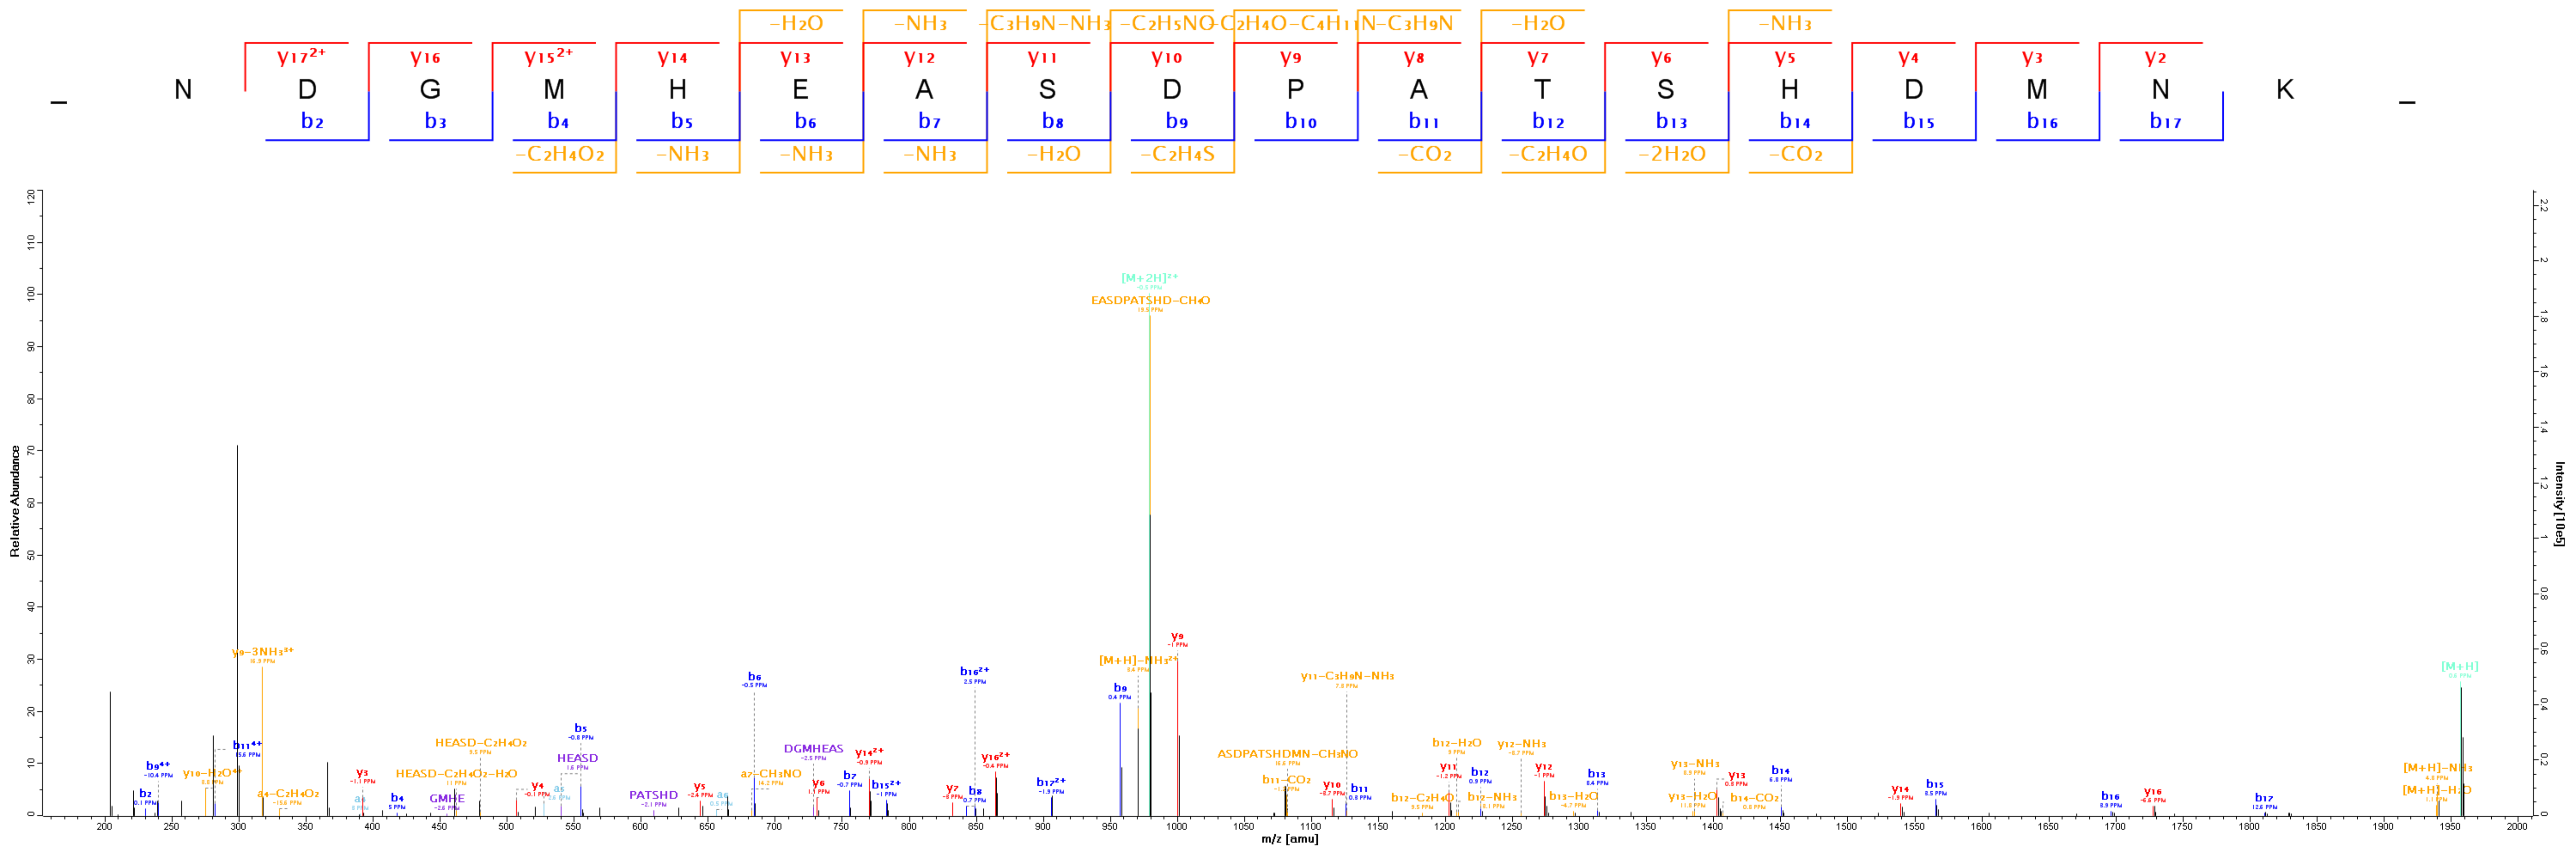

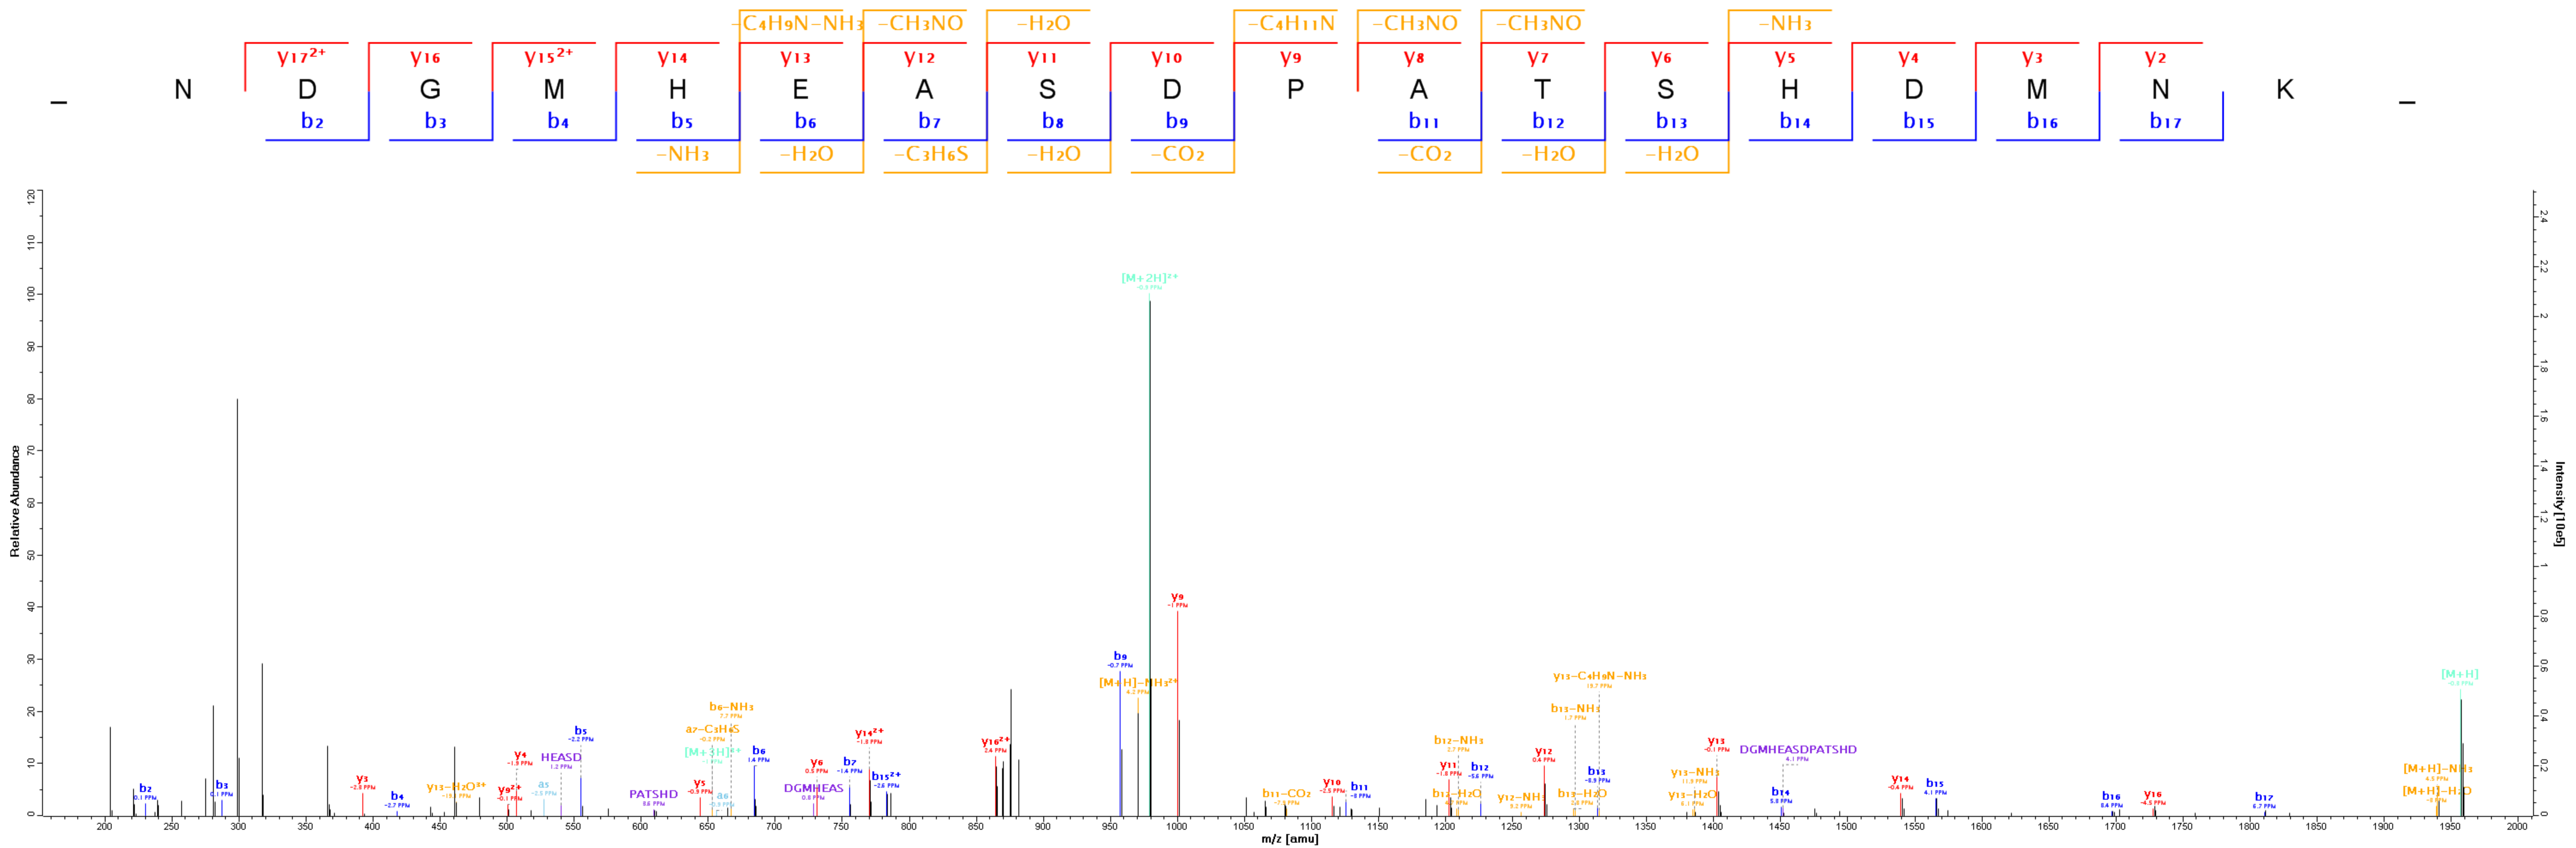

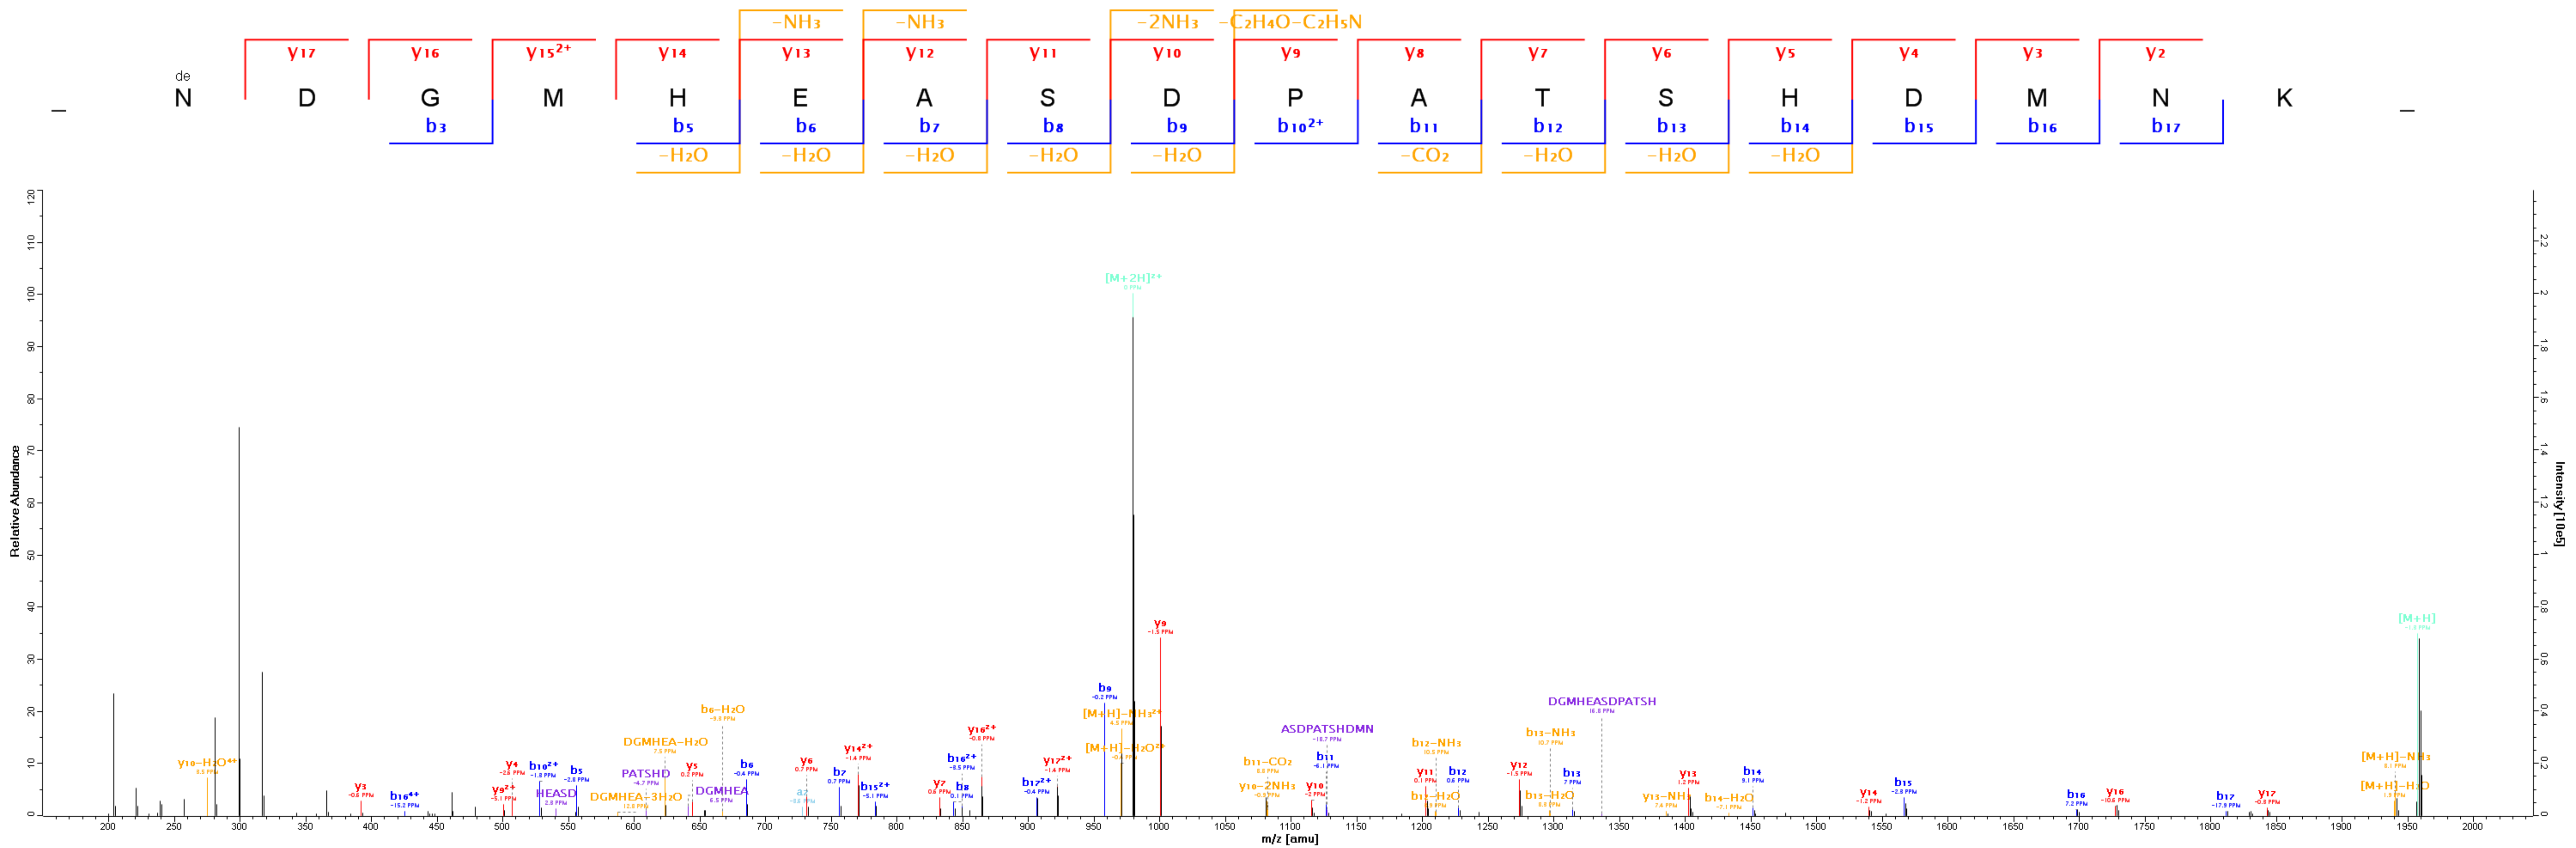

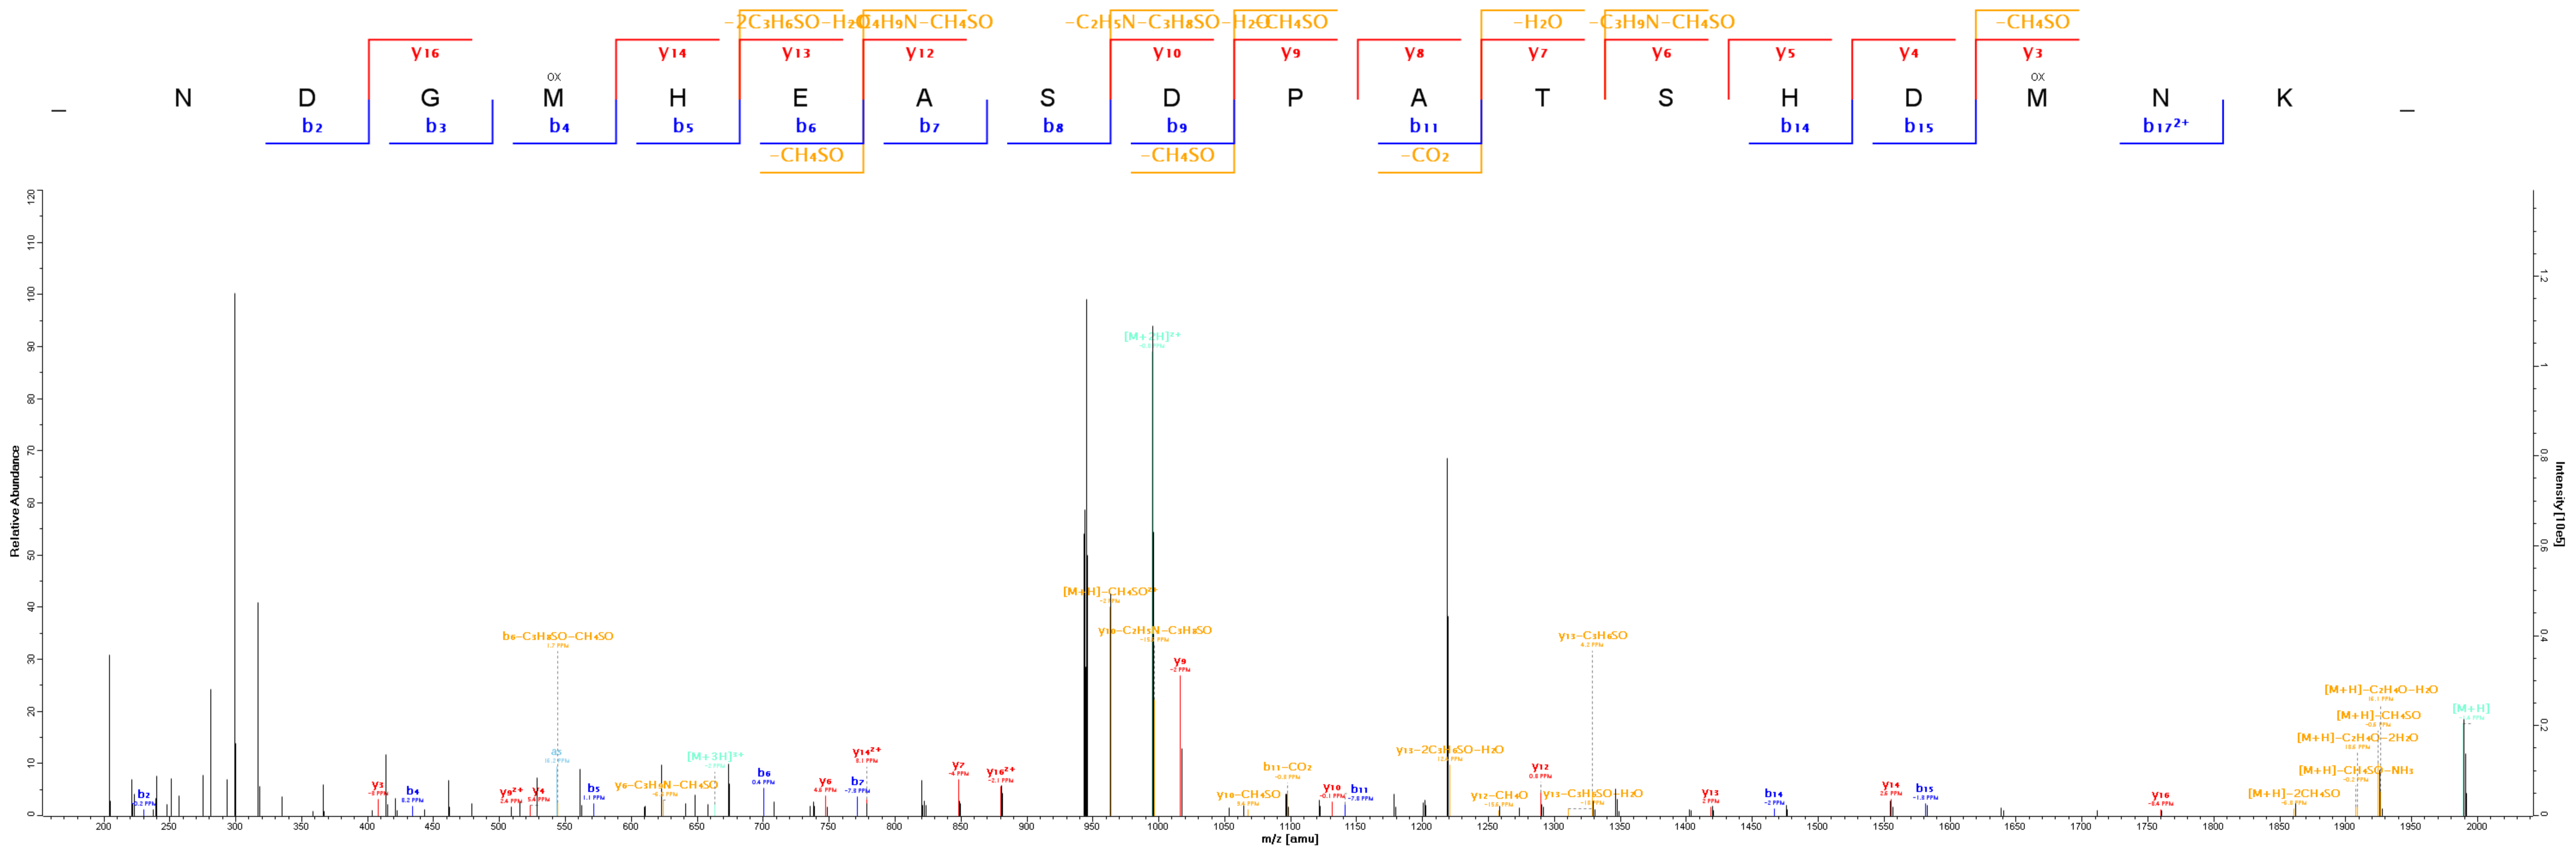

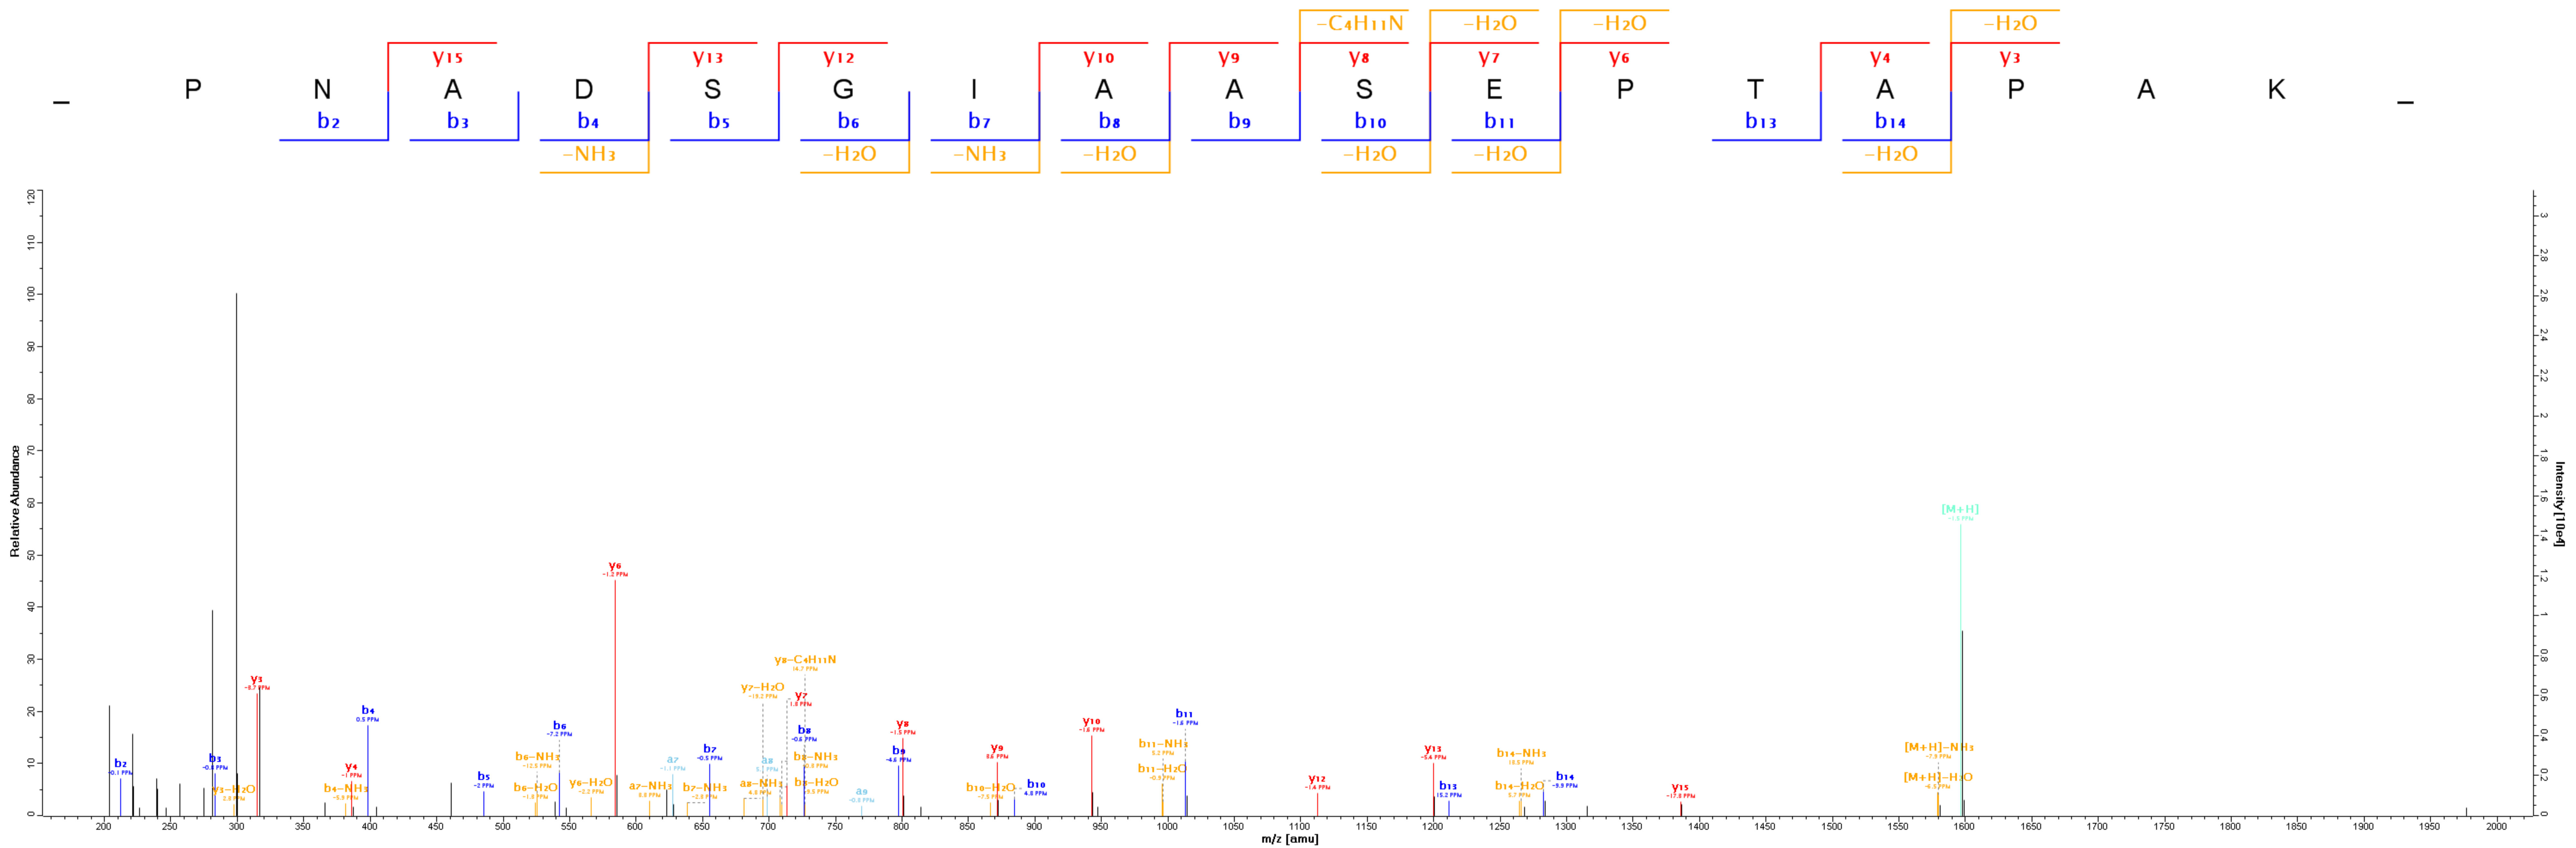

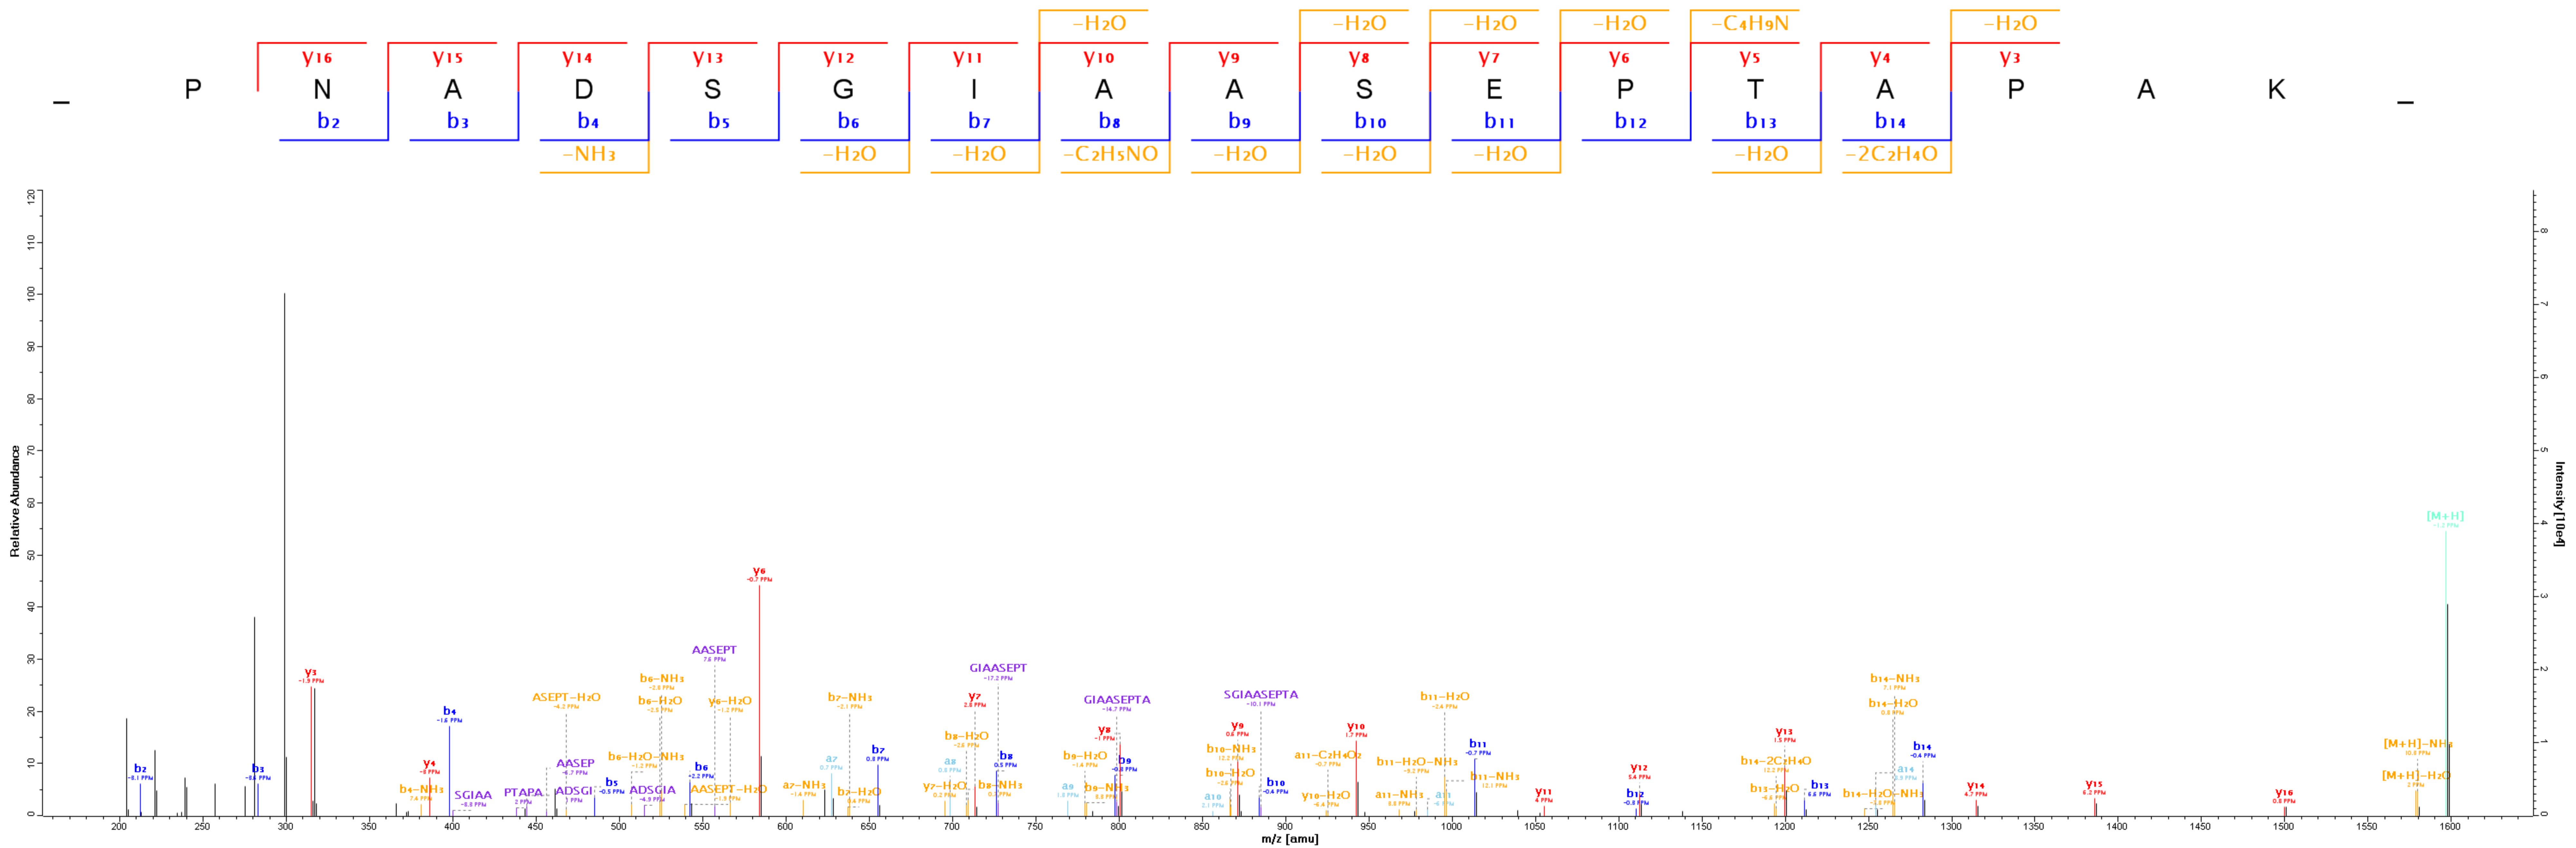

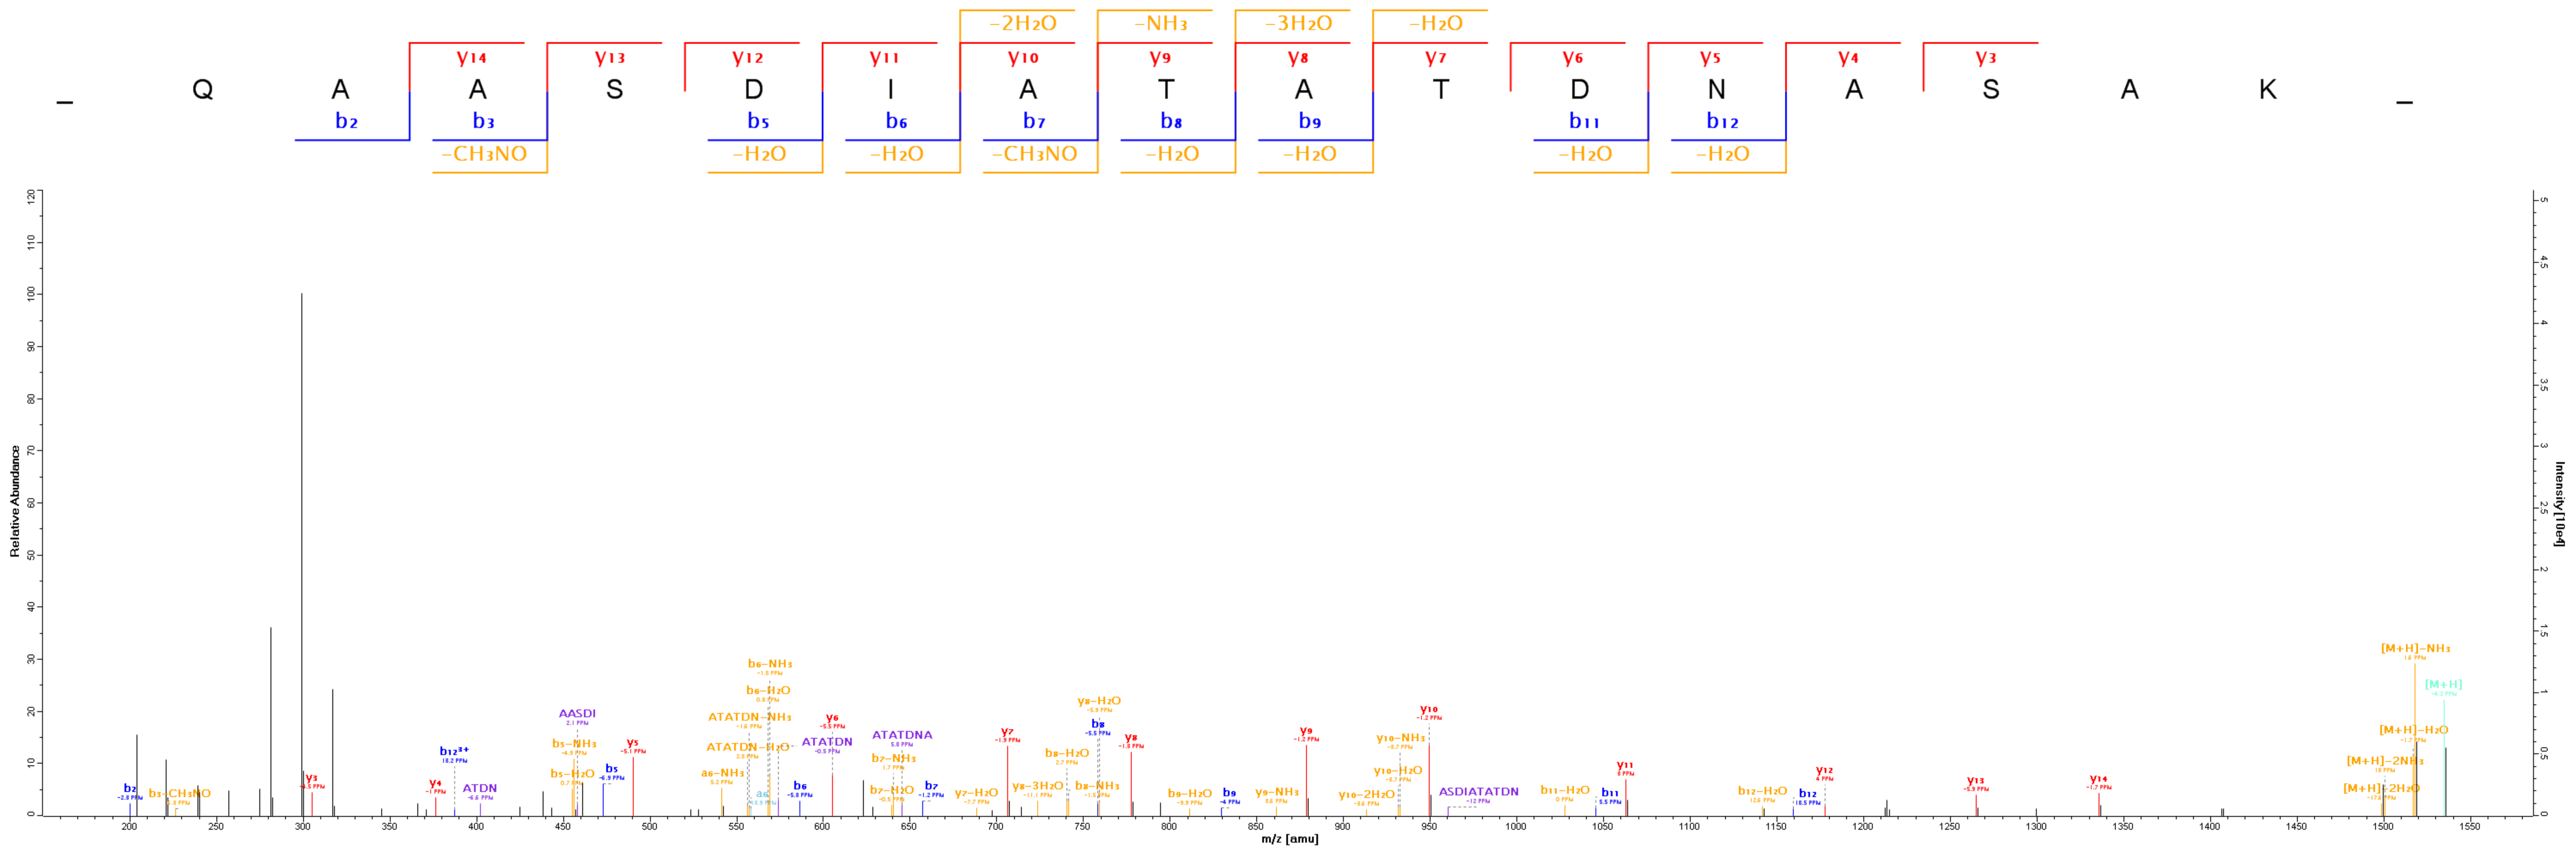

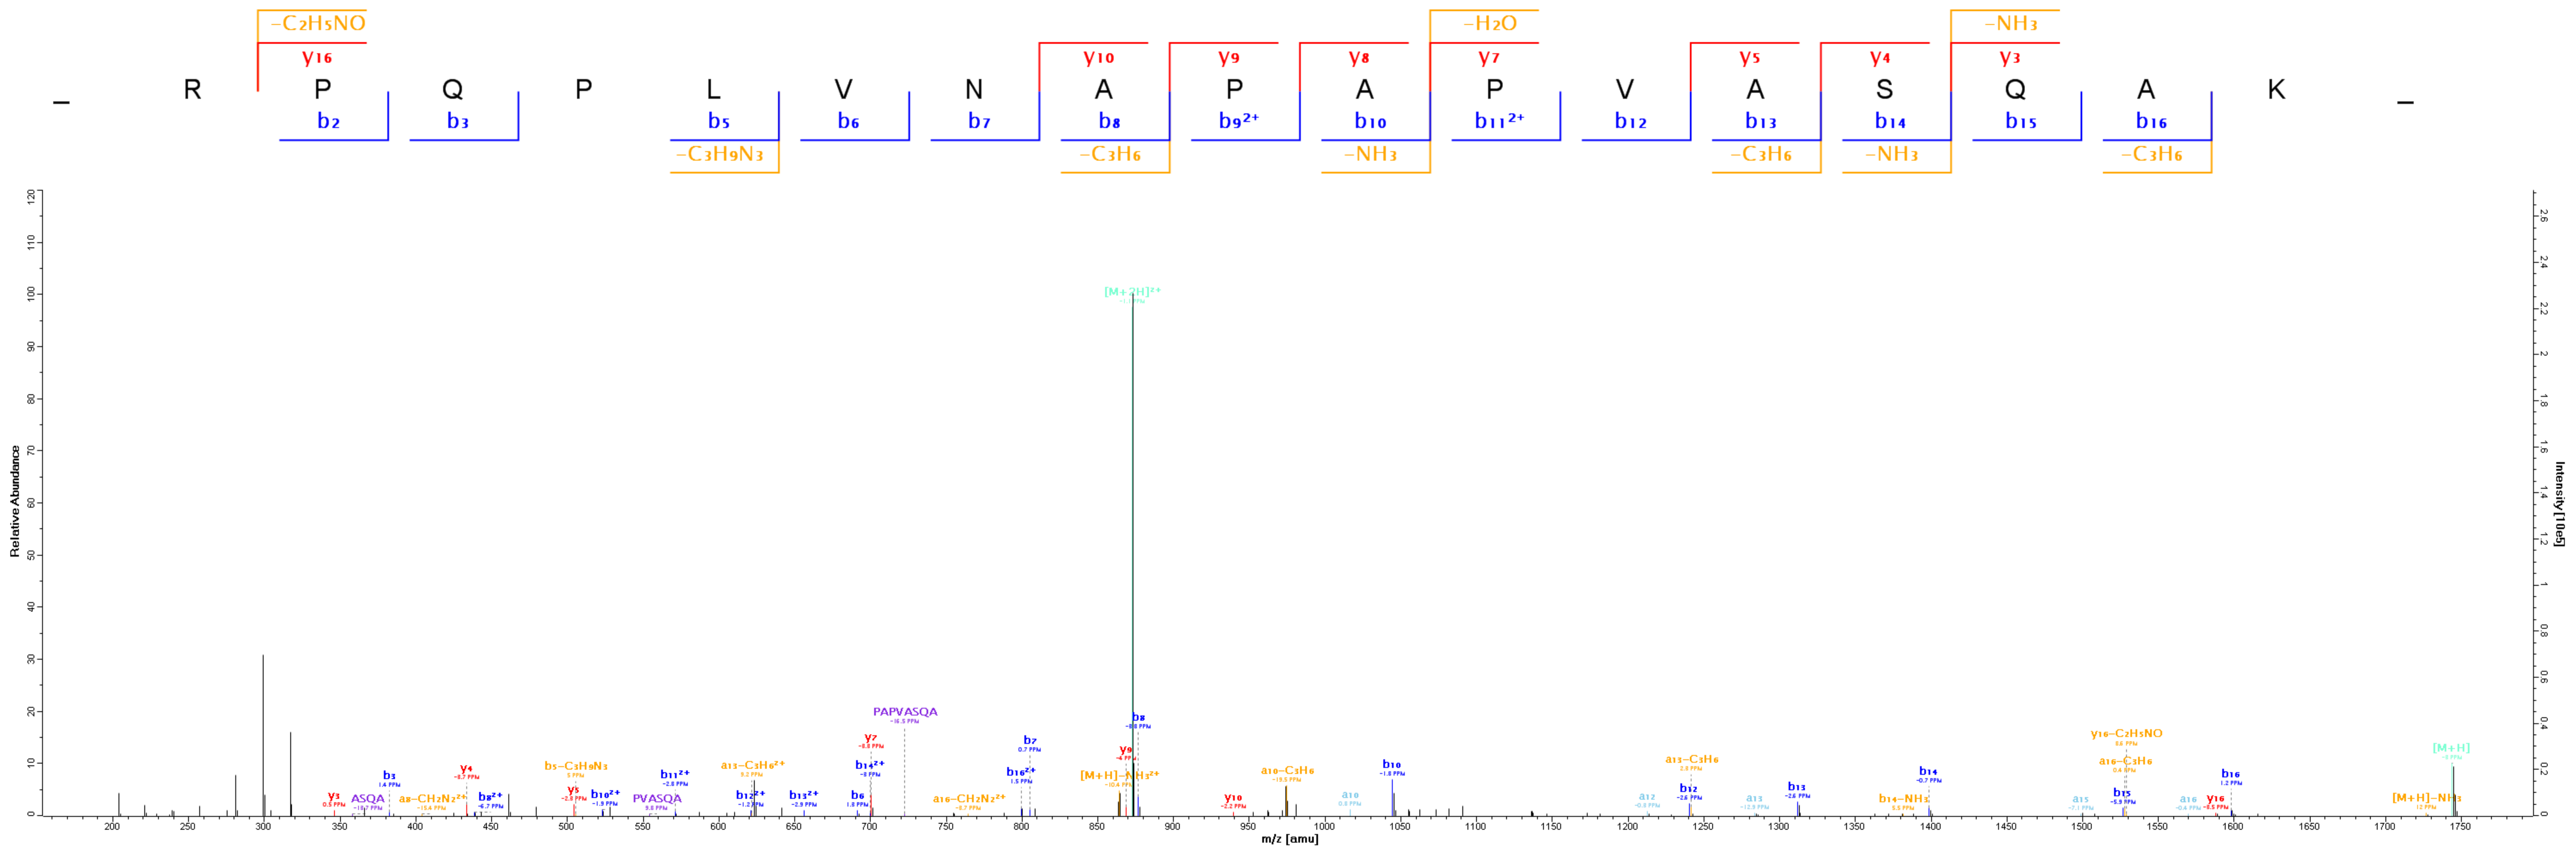



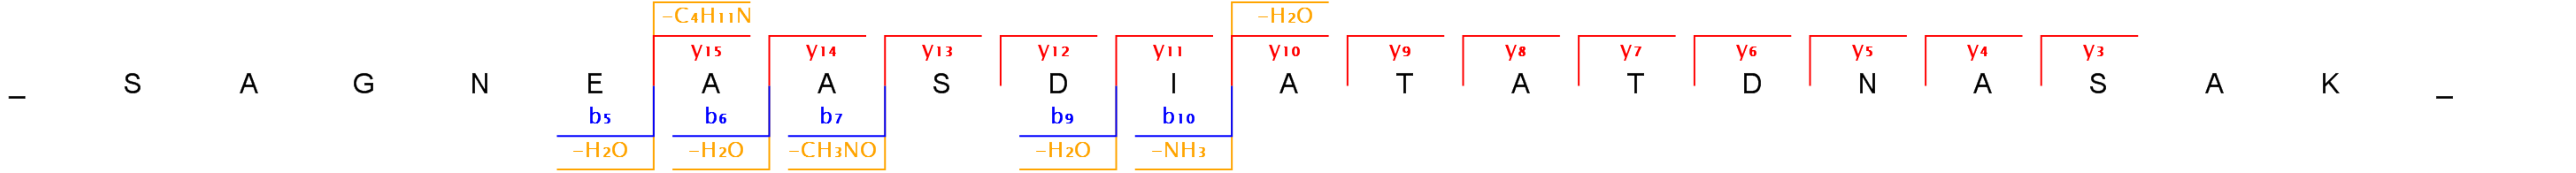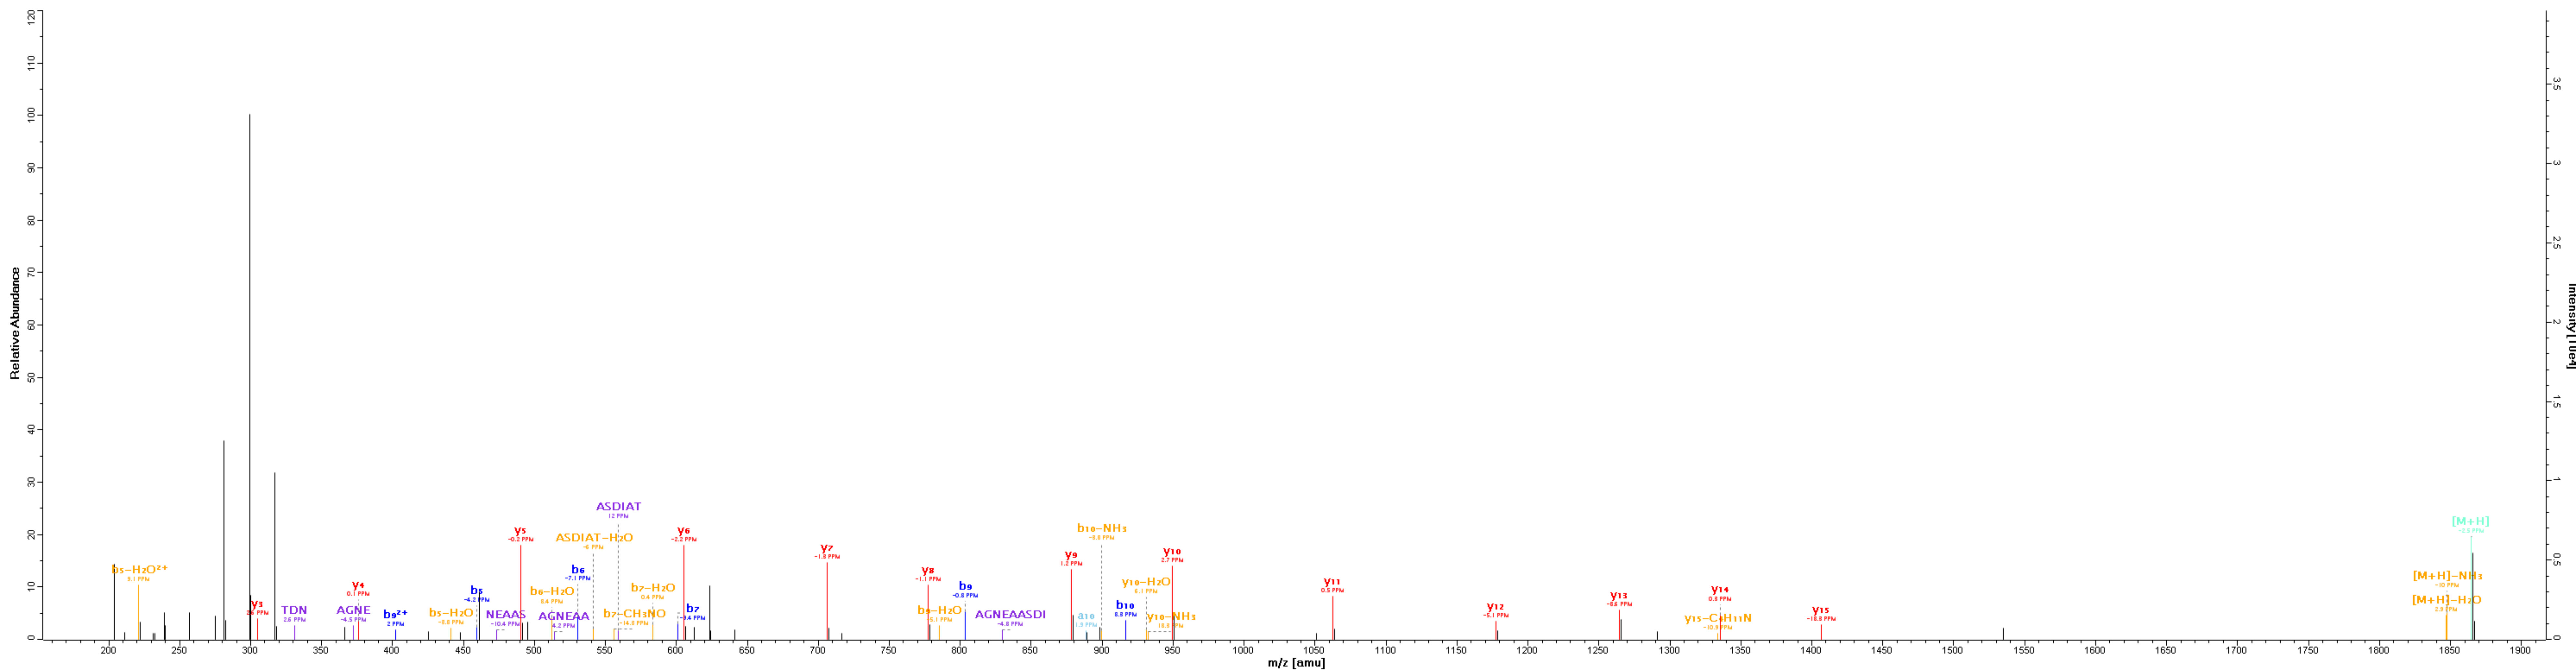

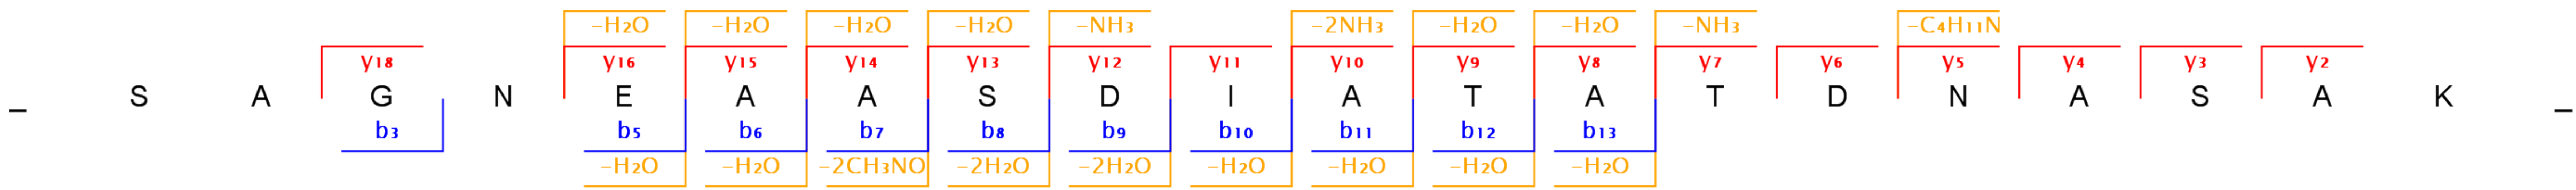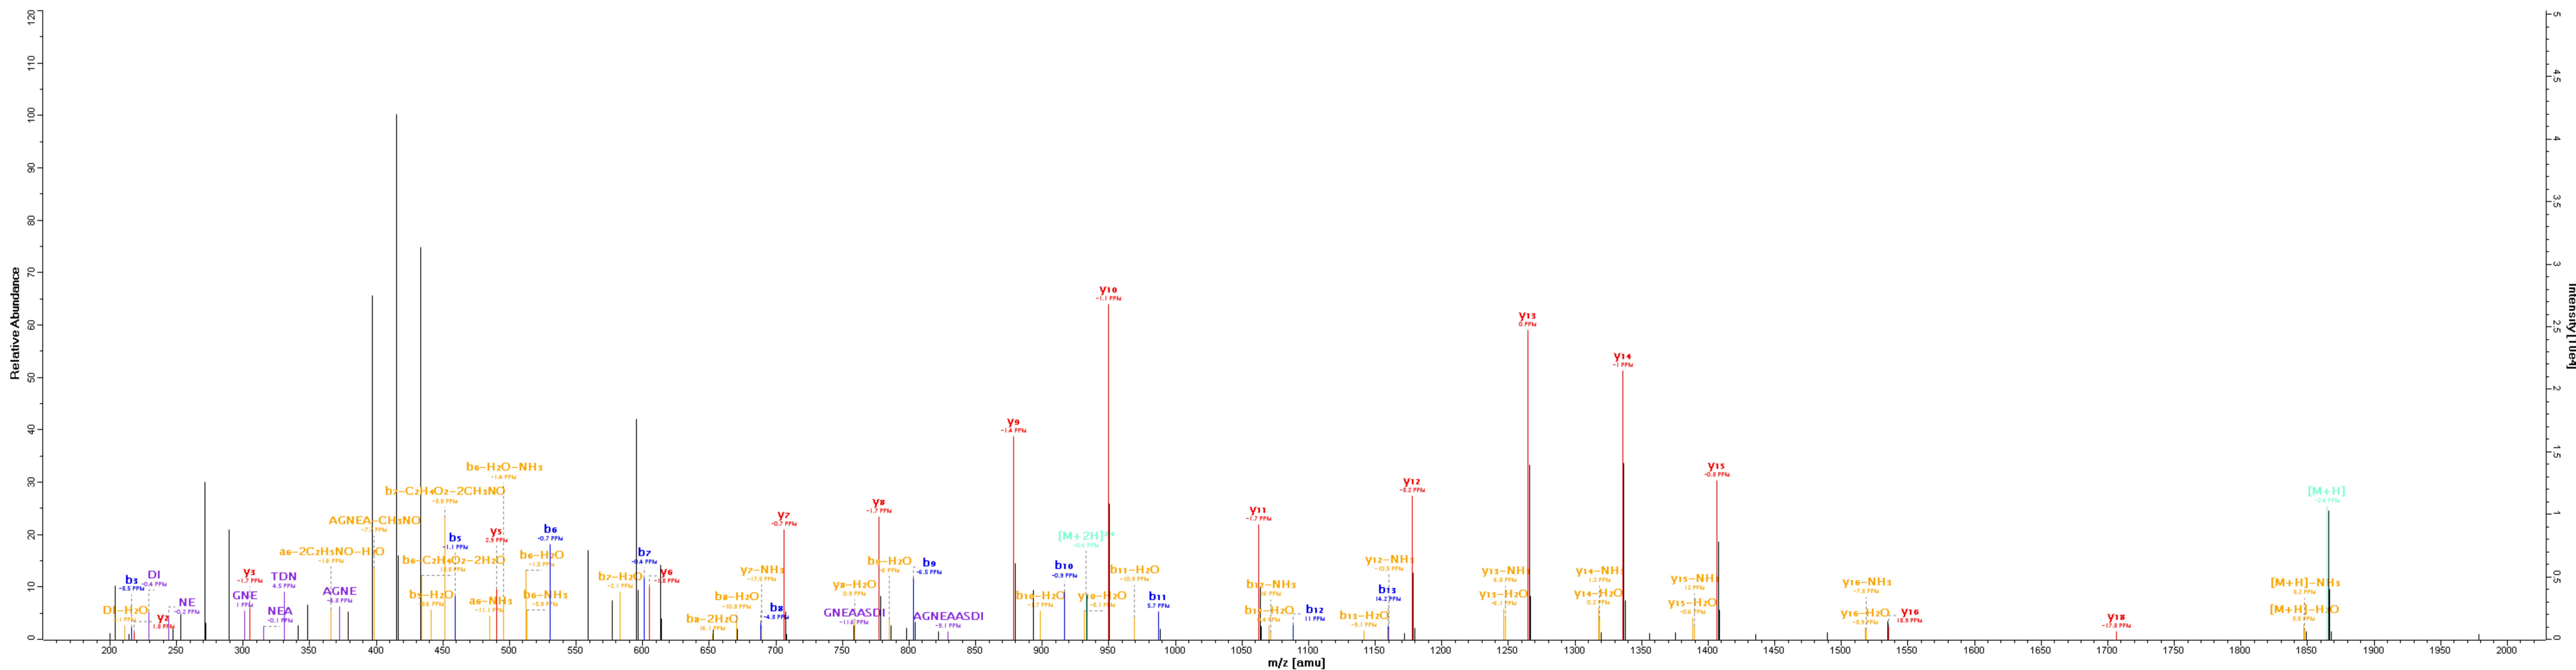

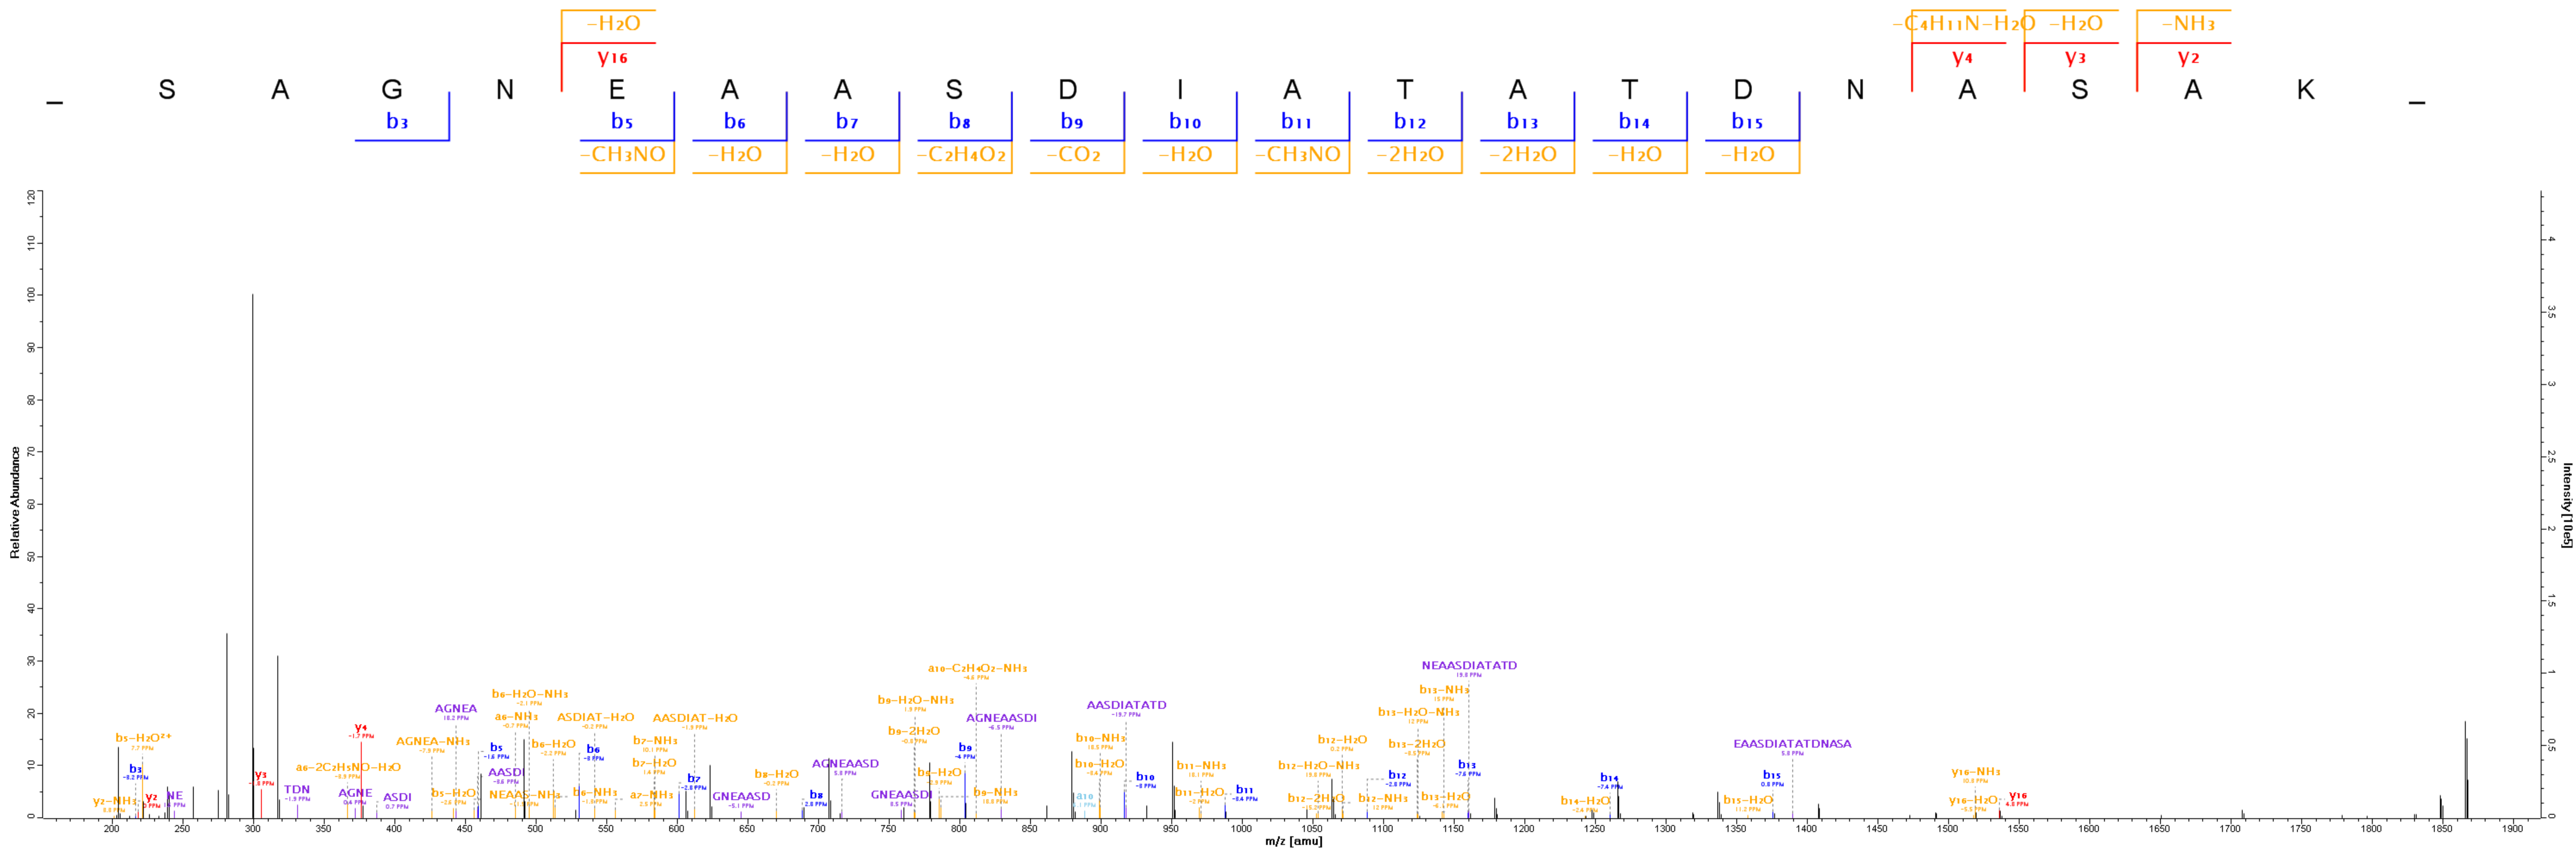

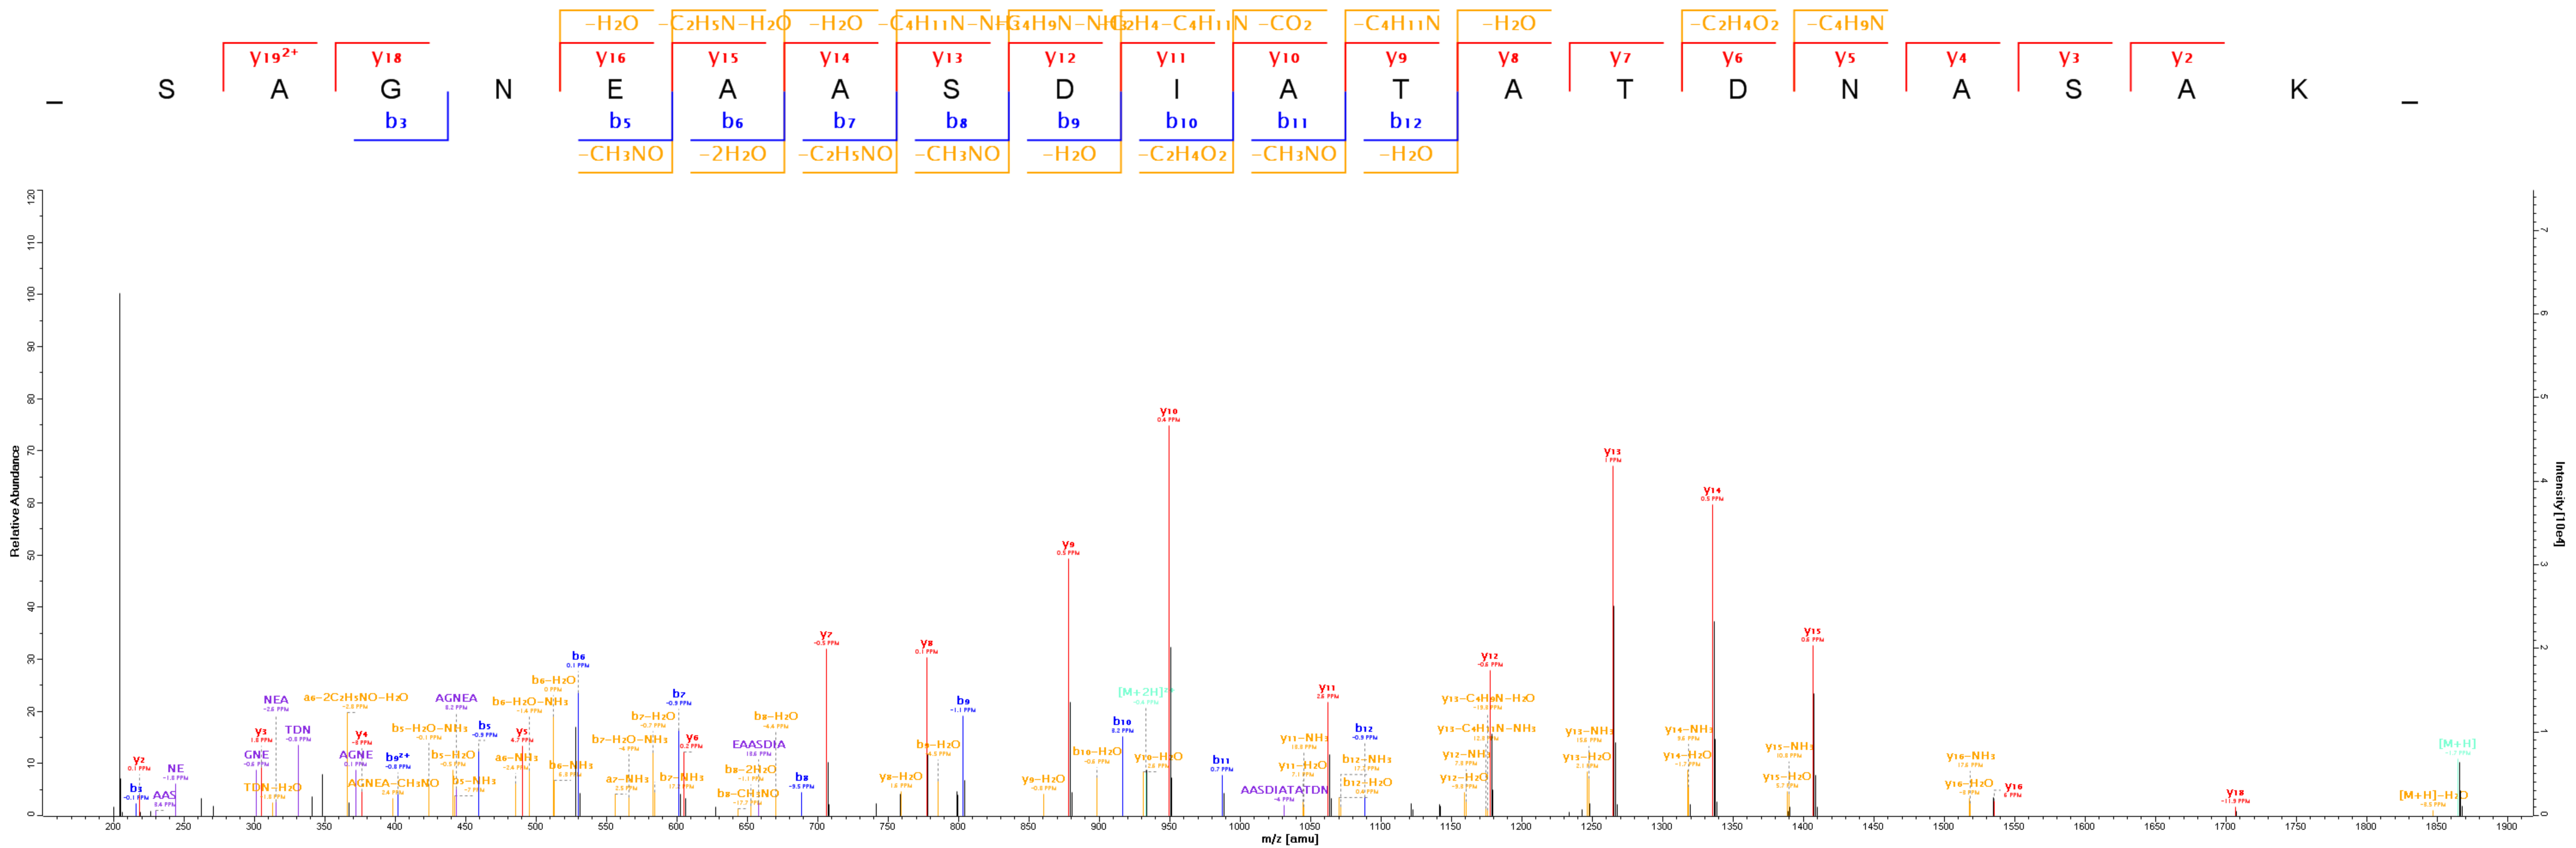

— S A G N E A A S D I A T A —

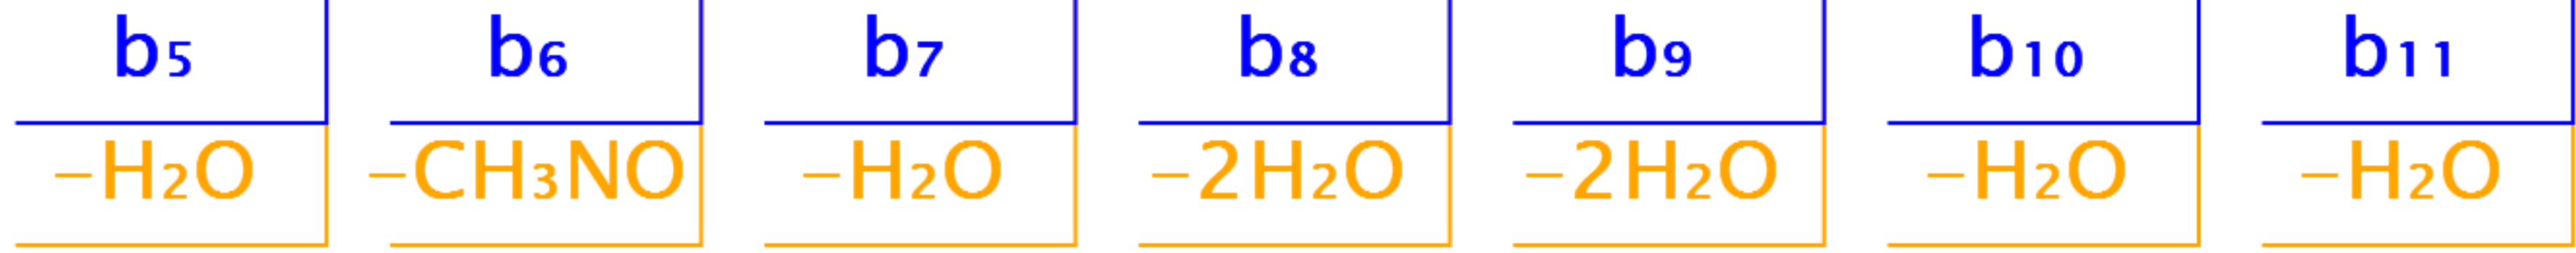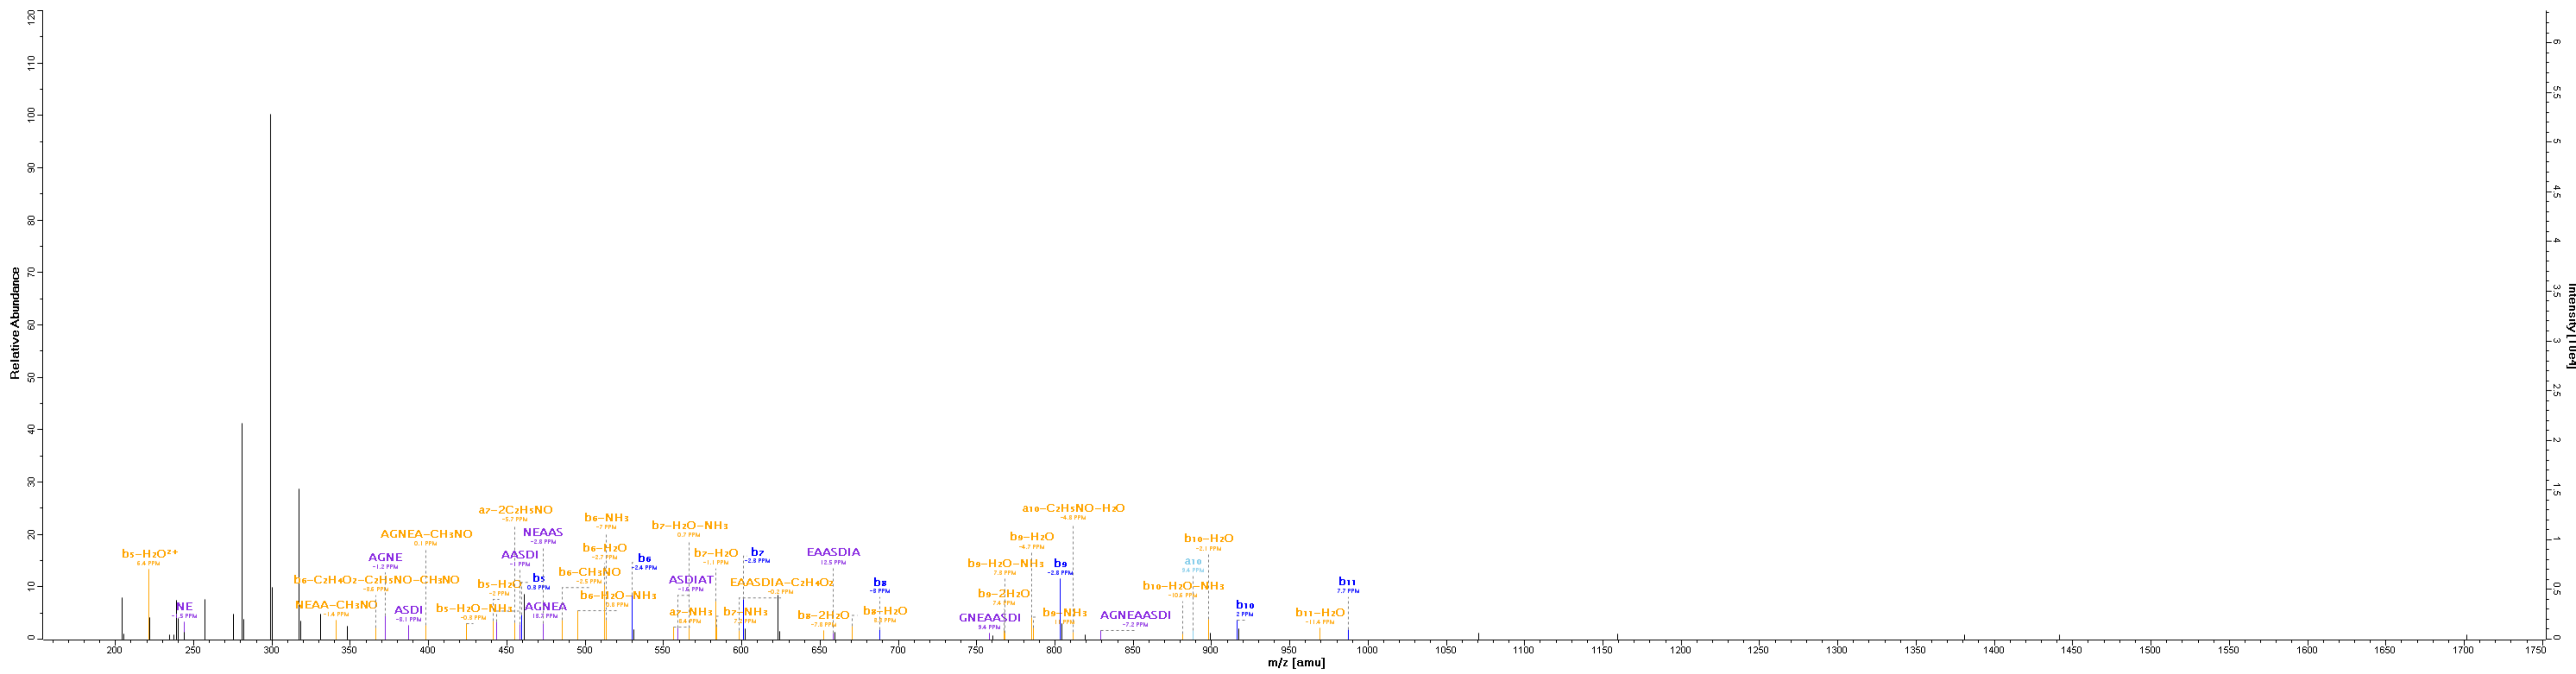





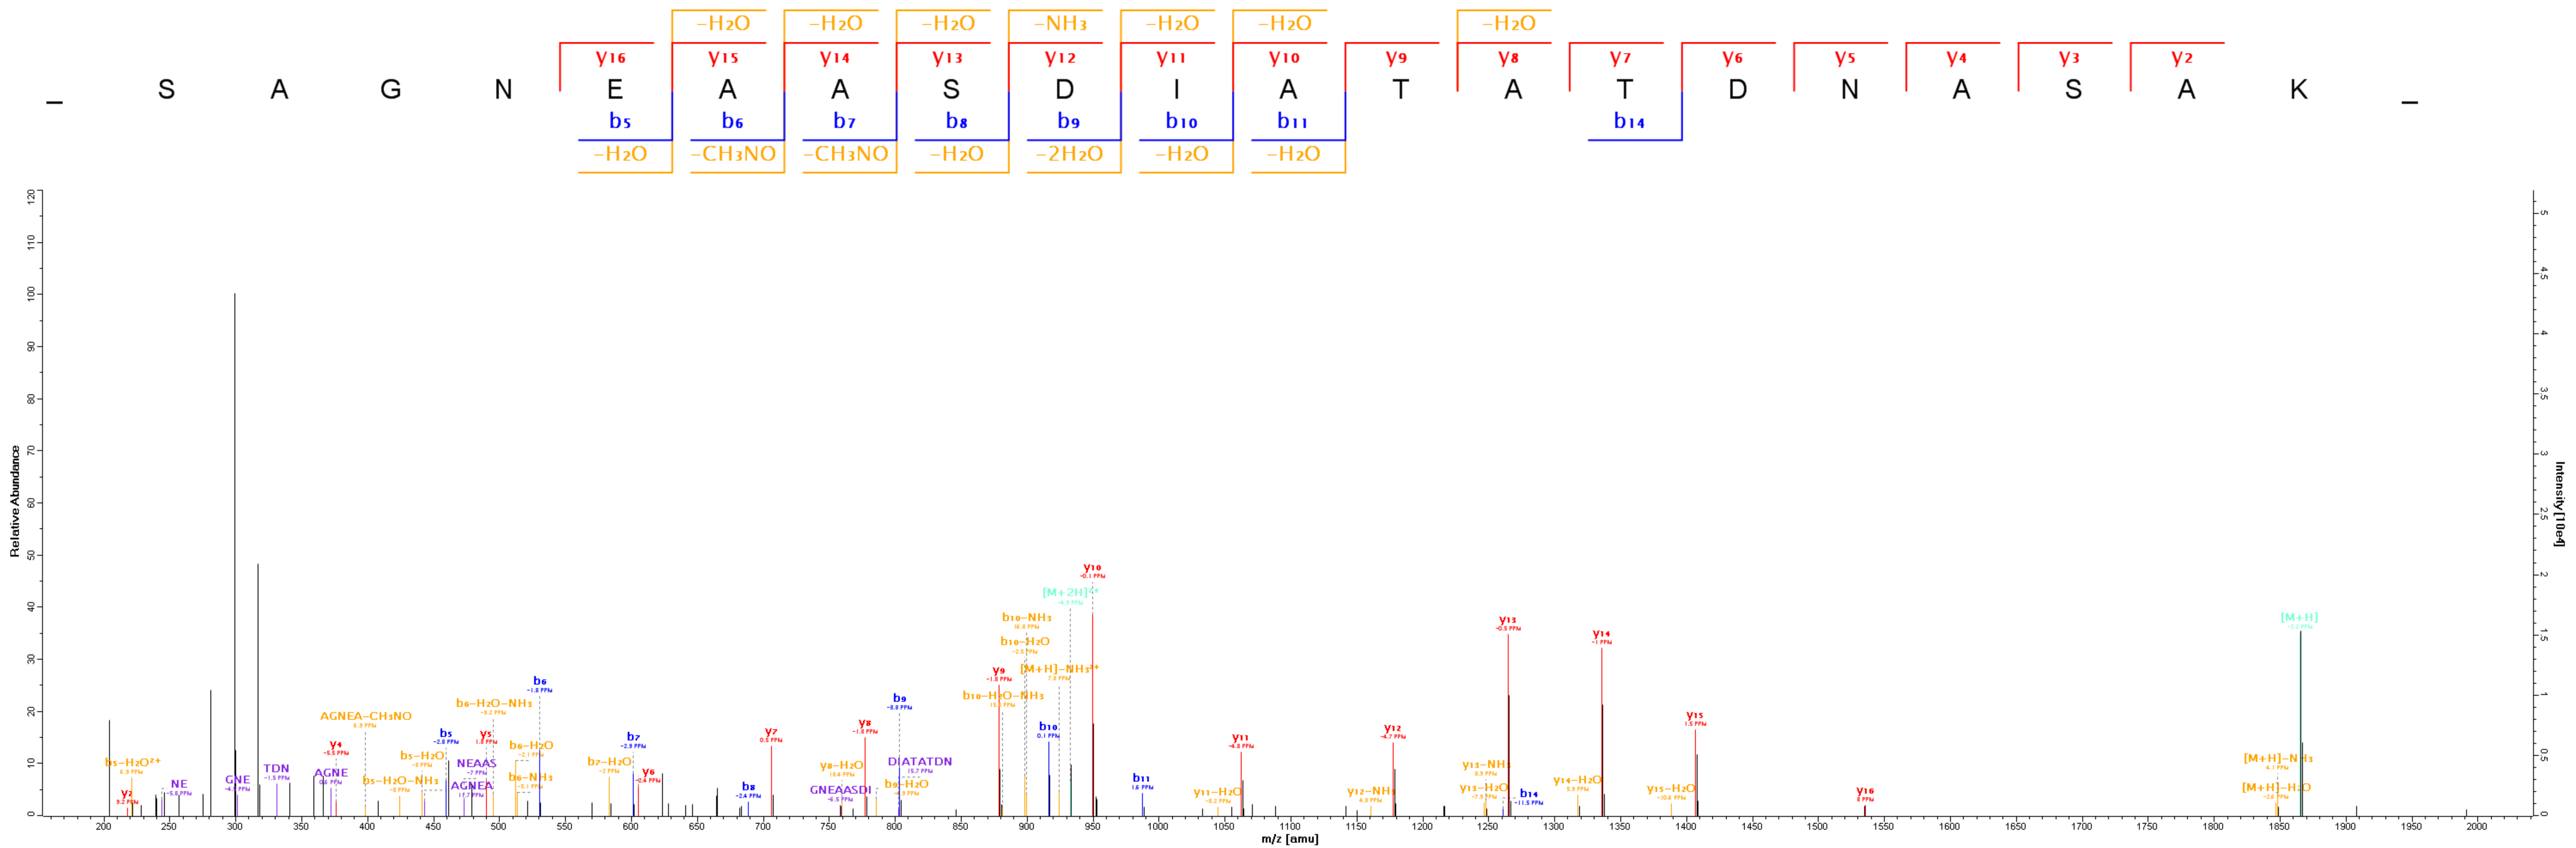



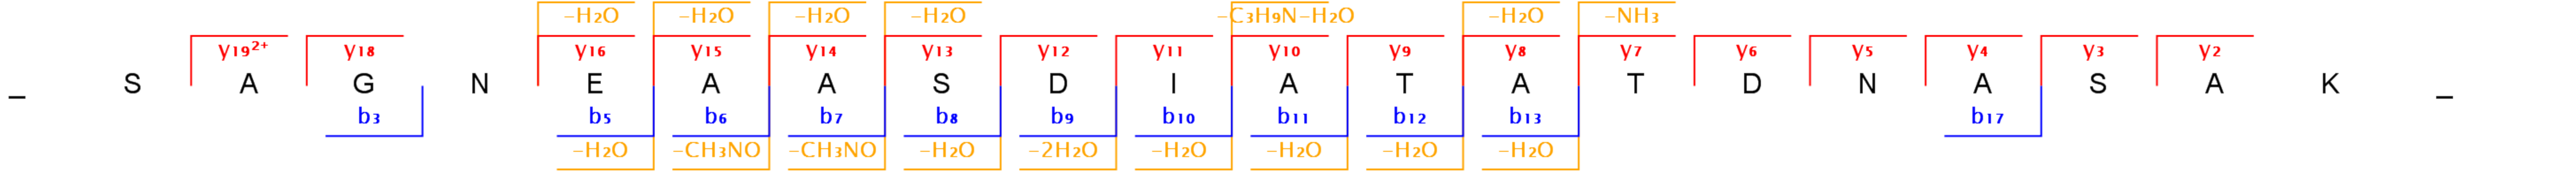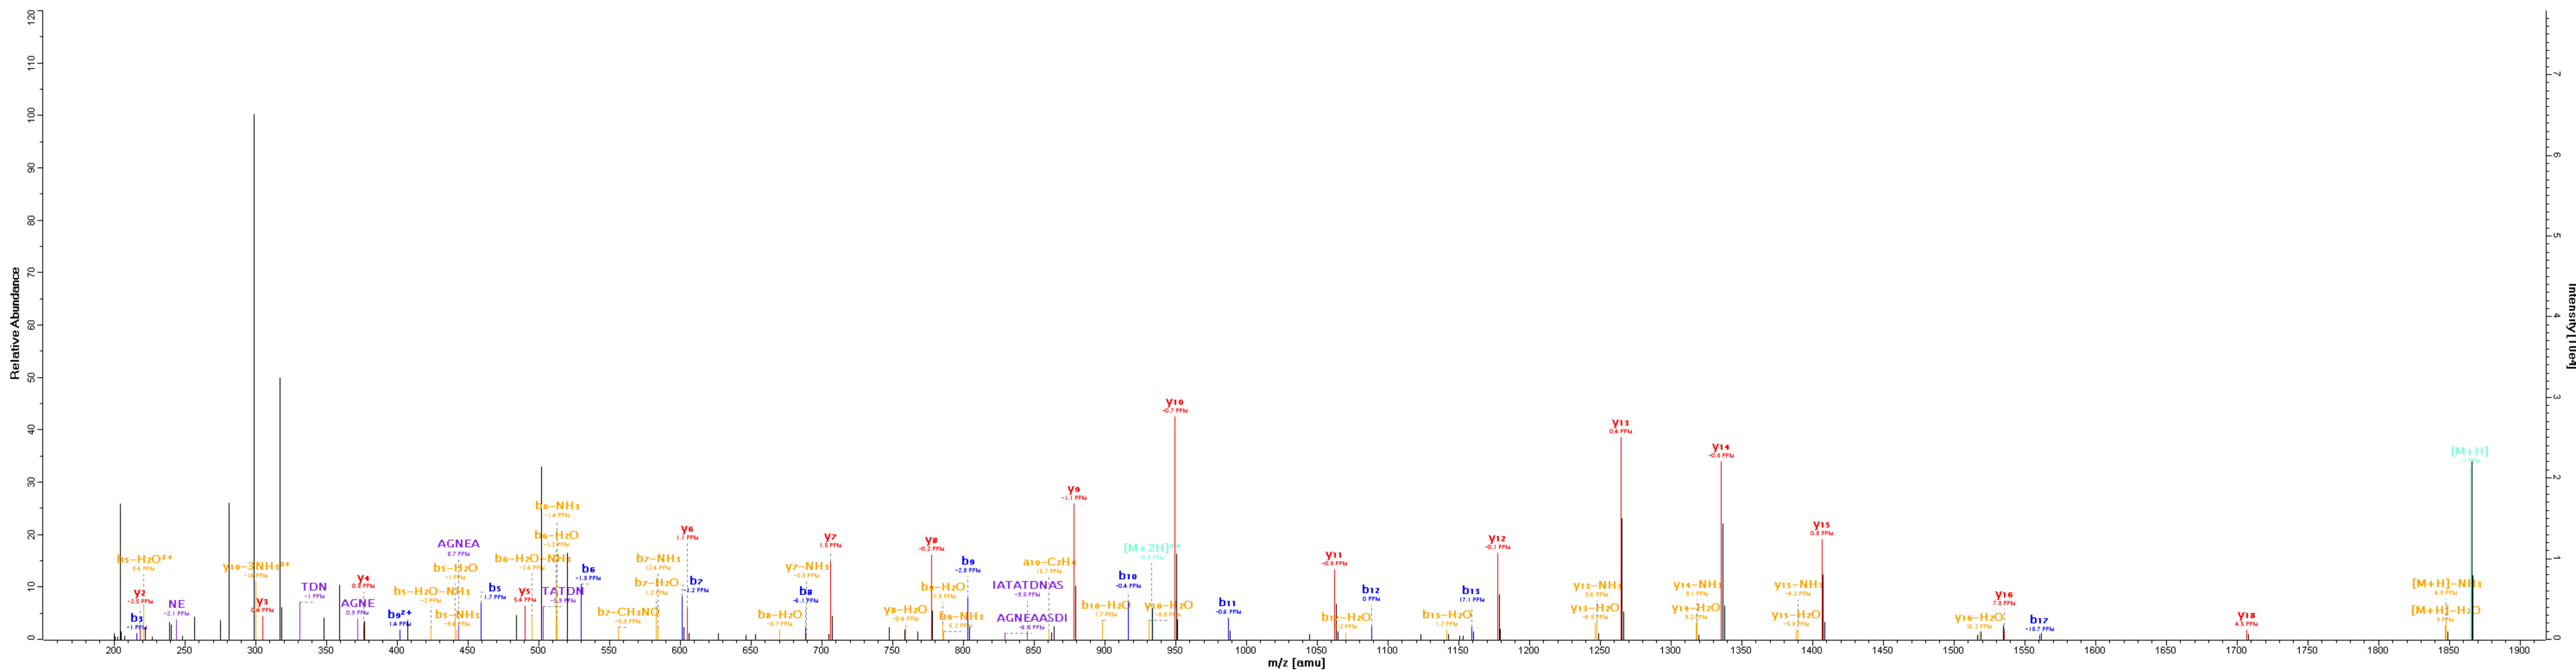

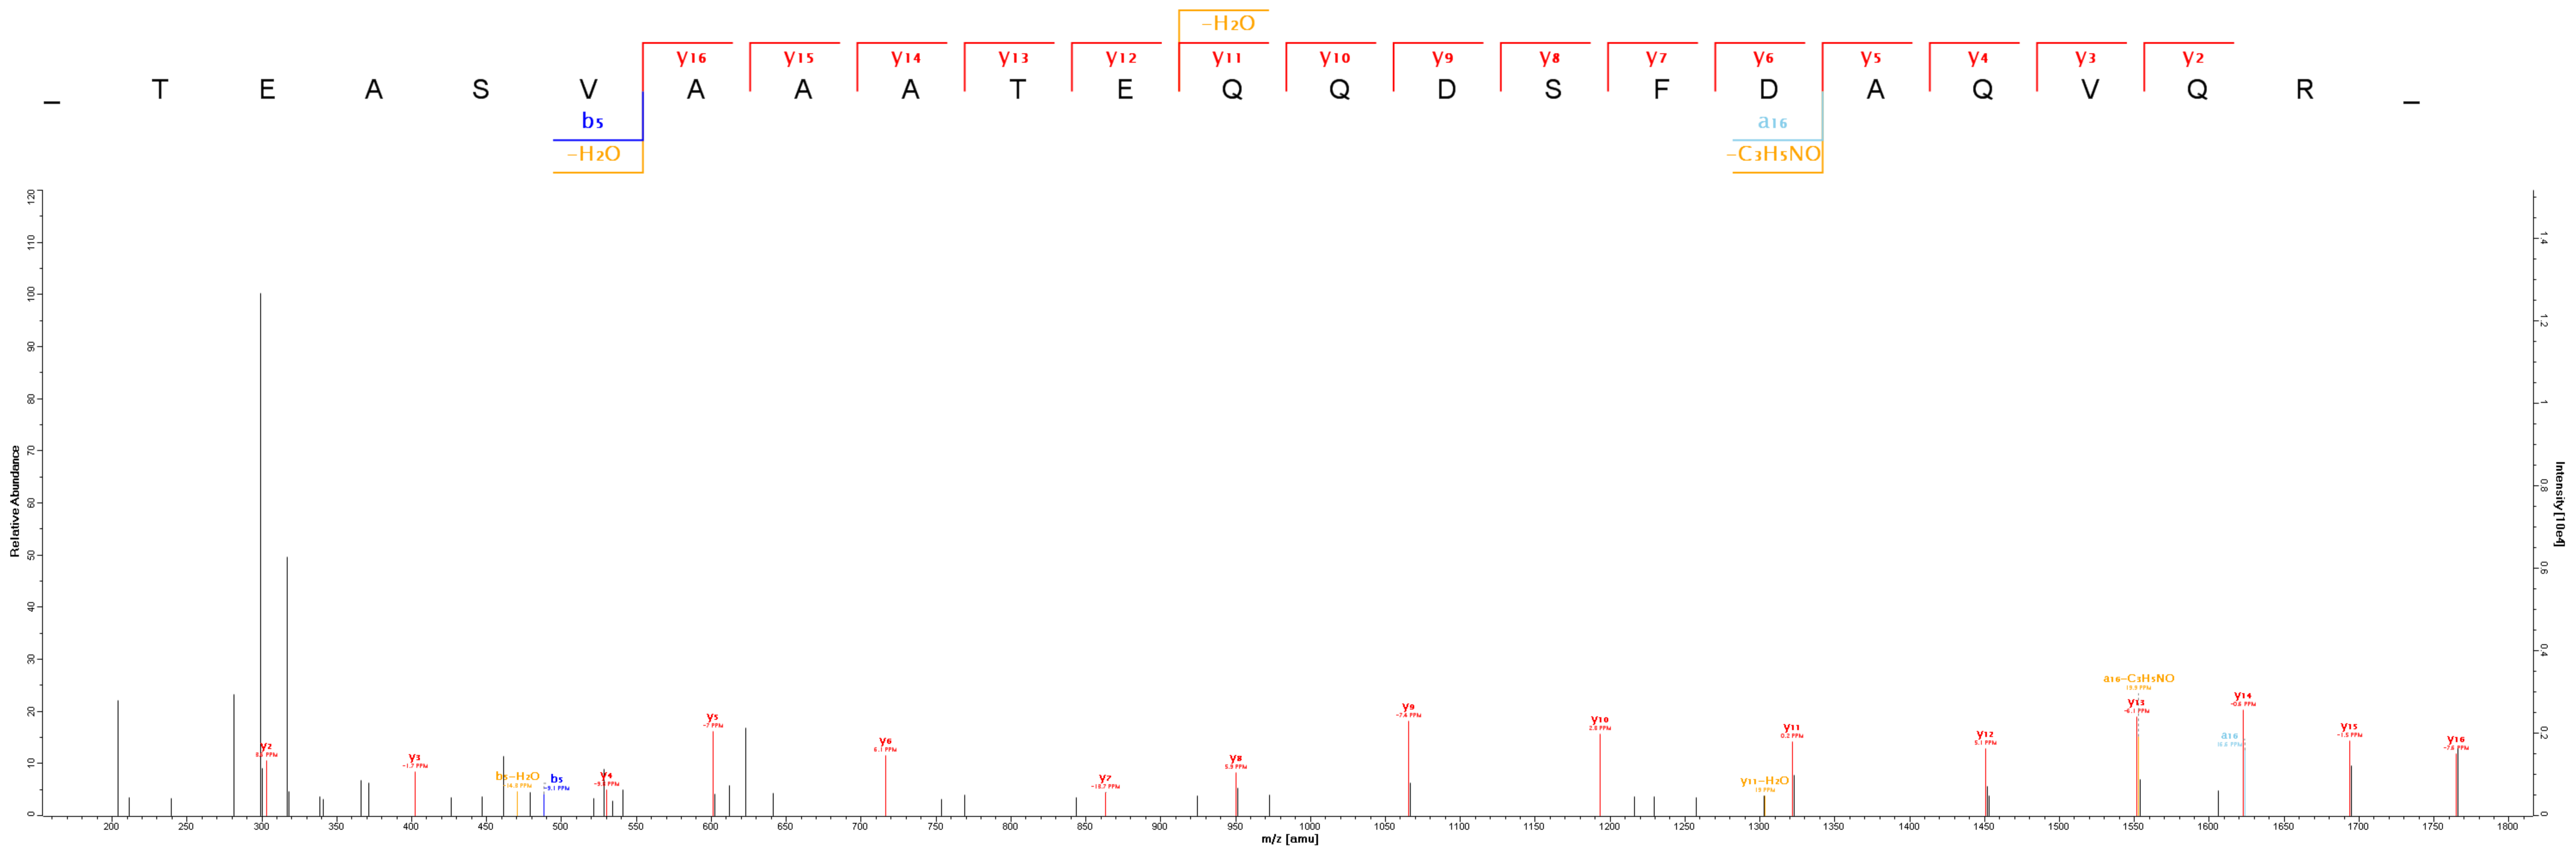

Supplement: supp_M114.038315_mcp.M114.038315-6.pdf [file supp_M114.038315_mcp.M114.038315-6.pdf]
