# Supplementary material
Source: PubMed Central journal article supplement (PMC4159654)

**Supplementary Table 6: HCD identified *Acinetobacter baumannii* (strain 1441 C1) glycopeptides**

| Uniprot accession number | protein name                                                                                                  | Precursor m/z [Da] | Precursor Charge | Precursor MH+ [Da] | glycan mass | glycan composition            | peptide mass | peptide                                                    | mascot score | Page |
|--------------------------|---------------------------------------------------------------------------------------------------------------|--------------------|------------------|--------------------|-------------|-------------------------------|--------------|------------------------------------------------------------|--------------|------|
| A3M265_ACIBT             | Uncharacterized protein [A1S_0556] [ <i>Acinetobacter baumannii</i> (strain ATCC 17978 / NCDC KC 755)] 313 AA | 918.93             | 4                | 3672.71            | 706.30      | HexNAc-187-316                | 2966.41      | <sup>108</sup> AAQADKKTEASAAATTEQQDSFDAQVQR <sup>135</sup> | 55           | 8    |
| A3M6D2_ACIBT             | Uncharacterized protein [A1S_2049] [ <i>Acinetobacter baumannii</i> (strain ATCC 17978 / NCDC KC 755)]        | 973.45             | 3                | 2918.34            | 1412.58     | double glycan; HexNAc-187-316 | 1505.76      | <sup>184</sup> AASEPEQKVEYVR <sup>196</sup>                | 27           | 9    |
| A3M6D2_ACIBT             | Uncharacterized protein [A1S_2049] [ <i>Acinetobacter baumannii</i> (strain ATCC 17978 / NCDC KC 755)]        | 738.02             | 3                | 2212.05            | 706.29      | HexNAc-187-316                | 1505.76      | <sup>184</sup> AASEPEQKVEYVR <sup>196</sup>                | 35           | 10   |
| A3M3X9_A_CIBT            | OmpA/MotB [A1S_1193] [ <i>Acinetobacter baumannii</i> (strain ATCC 17978 / NCDC KC 755)]                      | 1020.47            | 4                | 4078.87            | 2118.88     | Triple glycan; HexNAc-187-316 | 1959.99      | <sup>129</sup> AASGVEAAAAPATLTLSTDDK <sup>149</sup>        | 36           | 11   |
| A3M3X9_A_CIBT            | OmpA/MotB [A1S_1193] [ <i>Acinetobacter baumannii</i> (strain ATCC 17978 / NCDC KC 755)]                      | 889.43             | 3                | 2666.28            | 706.30      | HexNAc-187-316                | 1959.99      | <sup>129</sup> AASGVEAAAAPATLTLSTDDK <sup>149</sup>        | 63           | 12   |
| A3M3X9_A_CIBT            | OmpA/MotB [A1S_1193] [ <i>Acinetobacter baumannii</i> (strain ATCC 17978 / NCDC KC 755)]                      | 843.90             | 4                | 3372.58            | 1412.59     | double glycan; HexNAc-187-316 | 1959.99      | <sup>129</sup> AASGVEAAAAPATLTLSTDDK <sup>149</sup>        | 90           | 13   |
| A3M796_ACIBT             | Uncharacterized protein [A1S_2371] [ <i>Acinetobacter baumannii</i> (strain ATCC 17978 / NCDC KC 755)]        | 1665.25            | 2                | 3329.50            | 1412.58     | double glycan; HexNAc-187-316 | 1916.92      | <sup>82</sup> AEDQNADSGIAASTPVATAK <sup>101</sup>          | 58           | 14   |
| A3M265_ACIBT             | Uncharacterized protein [A1S_0556] [ <i>Acinetobacter baumannii</i> (strain ATCC 17978 / NCDC KC 755)]        | 1030.15            | 3                | 3088.45            | 2118.88     | Triple glycan; HexNAc-187-316 | 969.57       | <sup>301</sup> AKPASTPAVK <sup>310</sup>                   | 26           | 15   |

|               |                                                                                                                |         |   |         |         |                               |         |                                                       |    |    |
|---------------|----------------------------------------------------------------------------------------------------------------|---------|---|---------|---------|-------------------------------|---------|-------------------------------------------------------|----|----|
| A3M265_ ACIBT | Uncharacterized protein [A1S_0556] [Acinetobacter baumannii (strain ATCC 17978 / NCDC KC 755)]                 | 794.72  | 3 | 2382.15 | 1412.58 | double glycan; HexNAc-187-316 | 969.57  | <sup>301</sup> AKPASTPAVK <sup>310</sup>              | 38 | 16 |
| A7FB11_ ACIBT | Uncharacterized protein [A1S_3744] [Acinetobacter baumannii (strain ATCC 17978 / NCDC KC 755)]                 | 1025.16 | 3 | 3073.46 | 706.29  | HexNAc-187-316                | 2367.17 | <sup>29</sup> EEEQDKVETAVSEPQPQKPAK <sup>49</sup>     | 43 | 17 |
| A3M1A0_ ACIBT | Ammonium transport protein (Amt family) [A1S_0219] [Acinetobacter baumannii (strain ATCC 17978 / NCDC KC 755)] | 1346.13 | 4 | 5381.51 | 1412.58 | double glycan; HexNAc-187-316 | 3968.93 | <sup>23</sup> EETVTTPTSEVTATSTSEAPATIAAAPAAEETPAAPTF  | 54 | 18 |
| A7FB11_ ACIBT | Uncharacterized protein [A1S_3744] [Acinetobacter baumannii (strain ATCC 17978 / NCDC KC 755)]                 | 882.93  | 4 | 3528.70 | 706.30  | HexNAc-187-316                | 2822.41 | <sup>25</sup> ETPKEEEQDKVETAVSEPQPQKPAK <sup>49</sup> | 32 | 19 |
| A7FB63_ ACIBT | Uncharacterized protein [A1S_3626] [Acinetobacter baumannii (strain ATCC 17978 / NCDC KC 755)]                 | 1040.46 | 3 | 3119.37 | 1412.59 | double glycan; HexNAc-187-316 | 1706.78 | <sup>50</sup> GDQAASDIATATDNASAK <sup>67</sup>        | 88 | 20 |
| A3M9I2_ ACIBT | Putative membrane protein [A1S_3179] [Acinetobacter baumannii (strain ATCC 17978 / NCDC KC 755)]               | 1388.66 | 4 | 5551.64 | 1412.59 | double glycan; HexNAc-187-316 | 4139.04 | <sup>48</sup> IIQQQAQASKPQINSQAASSVTPQTQVANDMAD       | 32 | 21 |
| A3M9I2_ ACIBT | Putative membrane protein [A1S_3179] [Acinetobacter baumannii (strain ATCC 17978 / NCDC KC 755)]               | 1212.09 | 4 | 4845.34 | 706.30  | HexNAc-187-316                | 4139.04 | <sup>48</sup> IIQQQAQASKPQINSQAASSVTPQTQVANDMAD       | 67 | 22 |
| A3M9I2_ ACIBT | Putative membrane protein [A1S_3179] [Acinetobacter baumannii (strain ATCC 17978 / NCDC KC 755)]               | 973.07  | 5 | 4861.33 | 706.29  | HexNAc-187-316                | 4155.04 | <sup>48</sup> IIQQQAQASKPQINSQAASSVTPQTQVANDM(+)      | 50 | 23 |
| A3M6D2_ ACIBT | Uncharacterized protein [A1S_2049] [Acinetobacter baumannii (strain ATCC 17978 / NCDC KC 755)]                 | 695.66  | 3 | 2084.98 | 706.29  | HexNAc-187-316                | 1378.68 | <sup>183</sup> KAASEPEQKVEY <sup>194</sup>            | 29 | 24 |

|                  |                                                                                                         |         |   |         |         |                                         |         |                                                      |     |    |
|------------------|---------------------------------------------------------------------------------------------------------|---------|---|---------|---------|-----------------------------------------|---------|------------------------------------------------------|-----|----|
| A7FB9_A<br>CIBT  | Uncharacterized protein<br>[A1S_3682] [Acinetobacter<br>baumannii (strain ATCC 17978<br>/ NCDC KC 755)] | 866.40  | 3 | 2597.20 | 706.29  | HexNAc-187-<br>316                      | 1890.90 | <sup>23</sup> KEEATQAGQDAASTAVADK <sup>41</sup>      | 126 | 25 |
| A7FB63_A<br>CIBT | Uncharacterized protein<br>[A1S_3626] [Acinetobacter<br>baumannii (strain ATCC 17978<br>/ NCDC KC 755)] | 900.42  | 3 | 2699.24 | 706.29  | HexNAc-187-<br>316                      | 1992.95 | <sup>47</sup> KSAGDQAASDIATATDNASAK <sup>67</sup>    | 153 | 26 |
| A3M265_<br>ACIBT | Uncharacterized protein<br>[A1S_0556] [Acinetobacter<br>baumannii (strain ATCC 17978<br>/ NCDC KC 755)] | 1030.14 | 3 | 3088.41 | 706.29  | HexNAc-187-<br>316                      | 2382.12 | <sup>114</sup> KTEASAAATTEQQDSFDAQVQR <sup>135</sup> | 110 | 27 |
| A3M265_<br>ACIBT | Uncharacterized protein<br>[A1S_0556] [Acinetobacter<br>baumannii (strain ATCC 17978<br>/ NCDC KC 755)] | 924.77  | 3 | 2772.29 | 390.17  | HexNAc-187                              | 2382.12 | <sup>114</sup> KTEASAAATTEQQDSFDAQVQR <sup>135</sup> | 130 | 28 |
| A7FB95_A<br>CIBT | Uncharacterized protein<br>[A1S_3658] [Acinetobacter<br>baumannii (strain ATCC 17978<br>/ NCDC KC 755)] | 725.63  | 3 | 2174.87 | 706.29  | HexNAc-187-<br>316                      | 1468.58 | <sup>19</sup> NDGMHEASDPATSH <sup>32</sup>           | 64  | 29 |
| A7FB95_A<br>CIBT | Uncharacterized protein<br>[A1S_3658] [Acinetobacter<br>baumannii (strain ATCC 17978<br>/ NCDC KC 755)] | 763.97  | 3 | 2289.90 | 706.30  | HexNAc-187-<br>316                      | 1583.60 | <sup>19</sup> NDGMHEASDPATSHD <sup>33</sup>          | 36  | 30 |
| A7FB95_A<br>CIBT | Uncharacterized protein<br>[A1S_3658] [Acinetobacter<br>baumannii (strain ATCC 17978<br>/ NCDC KC 755)] | 1359.22 | 3 | 4075.66 | 2118.88 | Triple<br>glycan;<br>HexNAc-187-<br>316 | 1956.78 | <sup>19</sup> NDGMHEASDPATSHDMNK <sup>36</sup>       | 48  | 31 |
| A7FB95_A<br>CIBT | Uncharacterized protein<br>[A1S_3658] [Acinetobacter<br>baumannii (strain ATCC 17978<br>/ NCDC KC 755)] | 1123.79 | 3 | 3369.37 | 1412.59 | double<br>glycan;<br>HexNAc-187-<br>316 | 1956.78 | <sup>19</sup> NDGMHEASDPATSHDMNK <sup>36</sup>       | 82  | 32 |
| A7FB95_A<br>CIBT | Uncharacterized protein<br>[A1S_3658] [Acinetobacter<br>baumannii (strain ATCC 17978<br>/ NCDC KC 755)] | 888.36  | 3 | 2663.07 | 706.29  | HexNAc-187-<br>316                      | 1956.78 | <sup>19</sup> NDGMHEASDPATSHDMNK <sup>36</sup>       | 110 | 33 |
| A7FB95_A<br>CIBT | Uncharacterized protein<br>[A1S_3658] [Acinetobacter<br>baumannii (strain ATCC 17978<br>/ NCDC KC 755)] | 893.69  | 3 | 2679.07 | 706.29  | HexNAc-187-<br>316                      | 1972.78 | <sup>19</sup> NDGM(+16)HEASDPATSHDMNK <sup>36</sup>  | 56  | 34 |

|                  |                                                                                                         |         |   |         |         |                                         |         |                                                        |     |    |
|------------------|---------------------------------------------------------------------------------------------------------|---------|---|---------|---------|-----------------------------------------|---------|--------------------------------------------------------|-----|----|
| A7FB95_A<br>CIBT | Uncharacterized protein<br>[A1S_3658] [Acinetobacter<br>baumannii (strain ATCC 17978<br>/ NCDC KC 755)] | 1129.12 | 3 | 3385.36 | 1412.58 | double<br>glycan;<br>HexNAc-187-<br>316 | 1972.78 | <sup>19</sup> NDGM(+16)HEASDPATSHDMNK <sup>36</sup>    | 64  | 35 |
| A3M954_<br>ACIBT | Uncharacterized protein<br>[A1S_3051] [Acinetobacter<br>baumannii (strain ATCC 17978<br>/ NCDC KC 755)] | 1034.12 | 3 | 3100.35 | 706.30  | HexNAc-187-<br>316                      | 2394.06 | <sup>333</sup> NEGSAELDELFDGGAASEAPADTK <sup>356</sup> | 145 | 36 |
| A7FB95_A<br>CIBT | Uncharacterized protein<br>[A1S_3658] [Acinetobacter<br>baumannii (strain ATCC 17978<br>/ NCDC KC 755)] | 998.09  | 3 | 2992.25 | 706.29  | HexNAc-187-<br>316                      | 2285.95 | <sup>16</sup> NSKNDGMHEASDPATSHDMNK <sup>36</sup>      | 65  | 37 |
| N9KY37_A<br>CIBA | Uncharacterized protein<br>[F913_02548] [Acinetobacter<br>baumannii NIPH 80]                            | 1337.57 | 3 | 4010.69 | 2118.88 | Triple<br>glycan;<br>HexNAc-187-<br>316 | 1891.82 | <sup>62</sup> NTDVVEGSTASESAASETH <sup>80</sup>        | 26  | 38 |
| N9KY37_A<br>CIBA | Uncharacterized protein<br>[F913_02548] [Acinetobacter<br>baumannii NIPH 80]                            | 1652.71 | 2 | 3304.41 | 1412.59 | double<br>glycan;<br>HexNAc-187-<br>316 | 1891.82 | <sup>62</sup> NTDVVEGSTASESAASETH <sup>80</sup>        | 85  | 39 |
| A7FB63_A<br>CIBT | Uncharacterized protein<br>[A1S_3626] [Acinetobacter<br>baumannii (strain ATCC 17978<br>/ NCDC KC 755)] | 983.11  | 3 | 2947.32 | 1412.58 | double<br>glycan;<br>HexNAc-187-<br>316 | 1534.73 | <sup>52</sup> QAASDIATATDNASAK <sup>67</sup>           | 86  | 40 |
| A3M160_<br>ACIBT | Uncharacterized protein<br>[A1S_0171] [Acinetobacter<br>baumannii (strain ATCC 17978<br>/ NCDC KC 755)] | 1012.74 | 3 | 3036.21 | 706.30  | HexNAc-187-<br>316                      | 2329.91 | <sup>49</sup> QMMESHEQMNHAEHSSSAQ <sup>68</sup>        | 73  | 41 |
| N9IX31_A<br>CIBA | Uncharacterized protein<br>[F920_00864] [Acinetobacter<br>baumannii NIPH 335]                           | 1017.47 | 3 | 3050.39 | 706.30  | HexNAc-187-<br>316                      | 2344.09 | <sup>50</sup> QVVQQDEQSVESAAQPQTSP <sup>71</sup>       | 68  | 42 |
| A7FB63_A<br>CIBT | Uncharacterized protein<br>[A1S_3626] [Acinetobacter<br>baumannii (strain ATCC 17978<br>/ NCDC KC 755)] | 1050.45 | 3 | 3149.34 | 1412.58 | double<br>glycan;<br>HexNAc-187-<br>316 | 1736.76 | <sup>48</sup> SAGDQAASDIATATDNASA <sup>66</sup>        | 98  | 43 |
| A7FB63_A<br>CIBT | Uncharacterized protein<br>[A1S_3626] [Acinetobacter<br>baumannii (strain ATCC 17978<br>/ NCDC KC 755)] | 752.34  | 3 | 2255.02 | 390.17  | HexNAc-187                              | 1864.85 | <sup>48</sup> SAGDQAASDIATATDNASAK <sup>67</sup>       | 80  | 44 |

|                  |                                                                                                         |         |   |         |         |                                         |         |                                                      |     |    |
|------------------|---------------------------------------------------------------------------------------------------------|---------|---|---------|---------|-----------------------------------------|---------|------------------------------------------------------|-----|----|
| A7FB63_A<br>CIBT | Uncharacterized protein<br>[A1S_3626] [Acinetobacter<br>baumannii (strain ATCC 17978<br>/ NCDC KC 755)] | 823.87  | 4 | 3292.45 | 1427.60 | HexNAc-187-<br>316-HexNAc-<br>187-332   | 1864.85 | <sup>48</sup> SAGDQAASDIATATDNASAK <sup>67</sup>     | 85  | 45 |
| A7FB63_A<br>CIBT | Uncharacterized protein<br>[A1S_3626] [Acinetobacter<br>baumannii (strain ATCC 17978<br>/ NCDC KC 755)] | 996.69  | 4 | 3983.73 | 2118.88 | Triple<br>glycan;<br>HexNAc-187-<br>316 | 1864.85 | <sup>48</sup> SAGDQAASDIATATDNASAK <sup>67</sup>     | 90  | 46 |
| A7FB63_A<br>CIBT | Uncharacterized protein<br>[A1S_3626] [Acinetobacter<br>baumannii (strain ATCC 17978<br>/ NCDC KC 755)] | 1034.47 | 2 | 2067.94 | 203.09  | HexNAc                                  | 1864.85 | <sup>48</sup> SAGDQAASDIATATDNASAK <sup>67</sup>     | 92  | 47 |
| A7FB63_A<br>CIBT | Uncharacterized protein<br>[A1S_3626] [Acinetobacter<br>baumannii (strain ATCC 17978<br>/ NCDC KC 755)] | 987.78  | 3 | 2961.31 | 1096.46 | HexNAc-187-<br>316-HexNAc-<br>187       | 1864.85 | <sup>48</sup> SAGDQAASDIATATDNASAK <sup>67</sup>     | 102 | 48 |
| A7FB63_A<br>CIBT | Uncharacterized protein<br>[A1S_3626] [Acinetobacter<br>baumannii (strain ATCC 17978<br>/ NCDC KC 755)] | 843.72  | 3 | 2529.14 | 664.29  | HexNAc-145-<br>316                      | 1864.85 | <sup>48</sup> SAGDQAASDIATATDNASAK <sup>67</sup>     | 98  | 49 |
| A7FB63_A<br>CIBT | Uncharacterized protein<br>[A1S_3626] [Acinetobacter<br>baumannii (strain ATCC 17978<br>/ NCDC KC 755)] | 1639.22 | 2 | 3277.44 | 1412.58 | double<br>glycan;<br>HexNAc-187-<br>316 | 1864.85 | <sup>48</sup> SAGDQAASDIATATDNASAK <sup>67</sup>     | 117 | 50 |
| A7FB63_A<br>CIBT | Uncharacterized protein<br>[A1S_3626] [Acinetobacter<br>baumannii (strain ATCC 17978<br>/ NCDC KC 755)] | 862.72  | 3 | 2586.16 | 721.31  | HexNAc-187-<br>331                      | 1864.85 | <sup>48</sup> SAGDQAASDIATATDNASAK <sup>67</sup>     | 124 | 51 |
| A7FB63_A<br>CIBT | Uncharacterized protein<br>[A1S_3626] [Acinetobacter<br>baumannii (strain ATCC 17978<br>/ NCDC KC 755)] | 1286.08 | 2 | 2571.15 | 706.29  | HexNAc-187-<br>316                      | 1864.85 | <sup>48</sup> SAGDQAASDIATATDNASAK <sup>67</sup>     | 131 | 52 |
| A7FB63_A<br>CIBT | Uncharacterized protein<br>[A1S_3626] [Acinetobacter<br>baumannii (strain ATCC 17978<br>/ NCDC KC 755)] | 851.71  | 3 | 2556.12 | 691.27  | HexNAc-169-<br>316                      | 1864.85 | <sup>48</sup> SAGDQAASDIATATDNASAK <sup>67</sup>     | 102 | 53 |
| A7FB63_A<br>CIBT | Uncharacterized protein<br>[A1S_3626] [Acinetobacter<br>baumannii (strain ATCC 17978<br>/ NCDC KC 755)] | 1639.72 | 2 | 3278.42 | 1412.59 | double<br>glycan;<br>HexNAc-187-<br>316 | 1865.84 | <sup>48</sup> SAGDQAASDIATATDN(+1)ASAK <sup>67</sup> | 107 | 54 |

|                  |                                                                                                         |         |   |         |         |                                         |         |                                                                   |     |    |
|------------------|---------------------------------------------------------------------------------------------------------|---------|---|---------|---------|-----------------------------------------|---------|-------------------------------------------------------------------|-----|----|
| A7FB63_A<br>CIBT | Uncharacterized protein<br>[A1S_3626] [Acinetobacter<br>baumannii (strain ATCC 17978<br>/ NCDC KC 755)] | 1286.57 | 2 | 2572.13 | 706.28  | HexNAc-187-<br>316                      | 1865.85 | <sup>48</sup> SAGDQAASDIATATDN(+1)ASAK <sup>67</sup>              | 115 | 55 |
| A7FB63_A<br>CIBT | Uncharacterized protein<br>[A1S_3626] [Acinetobacter<br>baumannii (strain ATCC 17978<br>/ NCDC KC 755)] | 973.95  | 4 | 3892.78 | 706.30  | HexNAc-187-<br>316                      | 3186.48 | <sup>48</sup> SAGDQAASDIATATDNASAKIDAAADHAADATAK <sup>81</sup>    | 47  | 56 |
| A3M3E7_A<br>CIBT | Putative lipoprotein<br>[A1S_1009] [Acinetobacter<br>baumannii (strain ATCC 17978<br>/ NCDC KC 755)]    | 1398.62 | 3 | 4193.84 | 706.29  | HexNAc-187-<br>316                      | 3487.55 | <sup>29</sup> SDASTPVQTAQTNNNEAVDTAHTAENSLDWDGK <sup>61</sup>     | 64  | 57 |
| A7FAU3_A<br>CIBT | Uncharacterized protein<br>[A1S_3506] [Acinetobacter<br>baumannii (strain ATCC 17978<br>/ NCDC KC 755)] | 817.06  | 3 | 2449.18 | 706.28  | HexNAc-187-<br>316                      | 1742.89 | <sup>22</sup> SKKEEAPAAAAASEAVAAA <sup>40</sup>                   | 38  | 58 |
| A3M3E7_A<br>CIBT | Putative lipoprotein<br>[A1S_1009] [Acinetobacter<br>baumannii (strain ATCC 17978<br>/ NCDC KC 755)]    | 1542.68 | 3 | 4626.03 | 706.30  | HexNAc-187-<br>316                      | 3919.73 | <sup>25</sup> TETTSDASTPVQTAQTNNNEAVDTAHTAENSLDWDGK <sup>61</sup> | 39  | 59 |
| N9KIL3_A<br>CIBA | Uncharacterized protein<br>[F914_00444] [Acinetobacter<br>baumannii NIPH 290]                           | 968.11  | 3 | 2902.32 | 1412.58 | double<br>glycan;<br>HexNAc-187-<br>316 | 1489.74 | <sup>56</sup> TTKPSESSEPVVQT <sup>69</sup>                        | 21  | 60 |
| N9KIL3_A<br>CIBA | Uncharacterized protein<br>[F914_00444] [Acinetobacter<br>baumannii NIPH 290]                           | 1213.07 | 2 | 2425.14 | 706.29  | HexNAc-187-<br>316                      | 1718.84 | <sup>56</sup> TTKPSESSEPVVQTQT <sup>71</sup>                      | 61  | 61 |
| N9KIL3_A<br>CIBA | Uncharacterized protein<br>[F914_00444] [Acinetobacter<br>baumannii NIPH 290]                           | 801.37  | 4 | 3202.47 | 1412.59 | double<br>glycan;<br>HexNAc-187-<br>316 | 1789.88 | <sup>56</sup> TTKPSESSEPVVQTQTA <sup>72</sup>                     | 24  | 62 |
| N9KIL3_A<br>CIBA | Uncharacterized protein<br>[F914_00444] [Acinetobacter<br>baumannii NIPH 290]                           | 1248.59 | 2 | 2496.17 | 706.29  | HexNAc-187-<br>316                      | 1789.88 | <sup>56</sup> TTKPSESSEPVVQTQTA <sup>72</sup>                     | 72  | 63 |
| N9KIL3_A<br>CIBA | Uncharacterized protein<br>[F914_00444] [Acinetobacter<br>baumannii NIPH 290]                           | 985.13  | 3 | 2953.37 | 706.30  | HexNAc-187-<br>316                      | 2247.07 | <sup>56</sup> TTKPSESSEPVVQTQTANSQQ <sup>76</sup>                 | 79  | 64 |

|                  |                                                                                                         |         |   |         |         |                                         |         |                                                             |     |    |
|------------------|---------------------------------------------------------------------------------------------------------|---------|---|---------|---------|-----------------------------------------|---------|-------------------------------------------------------------|-----|----|
| N9KIL3_A<br>CIBA | Uncharacterized protein<br>[F914_00444] [Acinetobacter<br>baumannii NIPH 290]                           | 1291.28 | 3 | 3871.81 | 1412.59 | double<br>glycan;<br>HexNAc-187-<br>316 | 2459.23 | <sup>56</sup> TTKPSESSEPVVQTQTANSQQLV <sup>78</sup>         | 56  | 65 |
| N9KIL3_A<br>CIBA | Uncharacterized protein<br>[F914_00444] [Acinetobacter<br>baumannii NIPH 290]                           | 1055.85 | 3 | 3165.52 | 706.30  | HexNAc-187-<br>316                      | 2459.23 | <sup>56</sup> TTKPSESSEPVVQTQTANSQQLV <sup>78</sup>         | 70  | 66 |
| N9KIL3_A<br>CIBA | Uncharacterized protein<br>[F914_00444] [Acinetobacter<br>baumannii NIPH 290]                           | 1524.06 | 3 | 4570.18 | 1412.59 | double<br>glycan;<br>HexNAc-187-<br>316 | 3157.59 | <sup>56</sup> TTKPSESSEPVVQTQTANSQQLVNEDVLK <sup>84</sup>   | 43  | 67 |
| N9KIL3_A<br>CIBA | Uncharacterized protein<br>[F914_00444] [Acinetobacter<br>baumannii NIPH 290]                           | 1288.63 | 3 | 3863.89 | 706.30  | HexNAc-187-<br>316                      | 3157.59 | <sup>56</sup> TTKPSESSEPVVQTQTANSQQLVNEDVLK <sup>84</sup>   | 73  | 68 |
| BOV6D8_A<br>CIBY | Uncharacterized protein<br>[ABAYE1588] [Acinetobacter<br>baumannii (strain AYE)]                        | 1376.26 | 3 | 4126.77 | 706.29  | HexNAc-187-<br>316                      | 3420.48 | <sup>105</sup> VDPSATQDDSSNATSDNTTPASAPAQTTESNK             | 81  | 69 |
| A7FBI1_AC<br>IBT | Uncharacterized protein<br>[A1S_3744] [Acinetobacter<br>baumannii (strain ATCC 17978<br>/ NCDC KC 755)] | 1007.82 | 3 | 3021.44 | 1412.58 | double<br>glycan;<br>HexNAc-187-<br>316 | 1608.86 | <sup>35</sup> VETAVSEPQPQKPAK <sup>49</sup>                 | 34  | 70 |
| A7FBI1_AC<br>IBT | Uncharacterized protein<br>[A1S_3744] [Acinetobacter<br>baumannii (strain ATCC 17978<br>/ NCDC KC 755)] | 1084.19 | 3 | 3250.55 | 706.30  | HexNAc-187-<br>316                      | 2544.25 | <sup>39</sup> VSEPQPQKPAKFESLESVDTQEA <sup>61</sup>         | 22  | 71 |
| A7FB17_A<br>CIBT | Uncharacterized protein<br>[A1S_3580] [Acinetobacter<br>baumannii (strain ATCC 17978<br>/ NCDC KC 755)] | 1429.33 | 3 | 4285.97 | 1412.59 | double<br>glycan;<br>HexNAc-187-<br>316 | 2873.38 | <sup>37</sup> VVVSTQEQAANTANAASDAVGSASEAAPATR <sup>66</sup> | 105 | 72 |

**Supplementary table 6:** Identifications are labeled according to the corresponding Uniprot accession number and protein name. The parent m/z, charge state, deconvoluted mass, glycan mass, glycan composition, peptide mass, peptide sequence and mascot ion score are provided for each identified glycopeptide. All identified glycopeptide HCD spectra are provided and are available on the designated pages

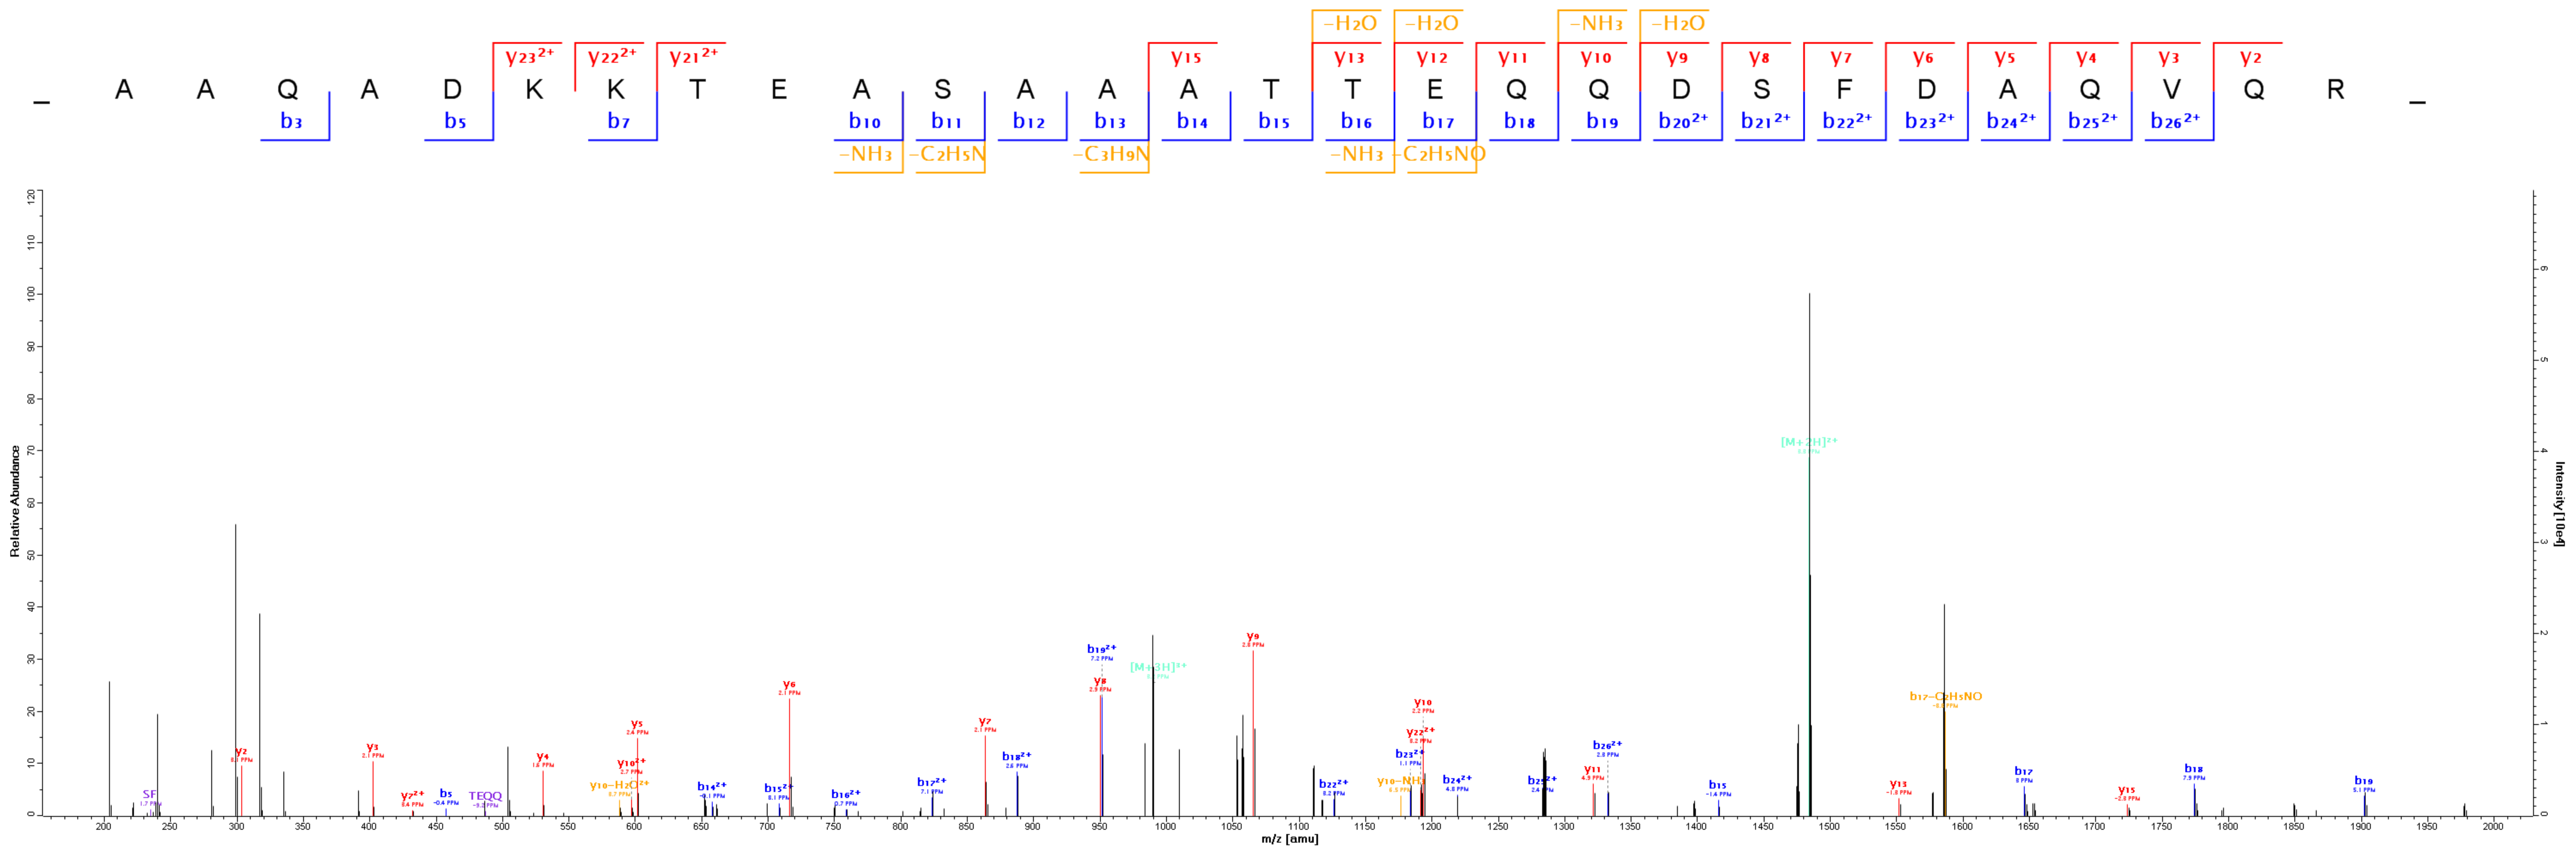



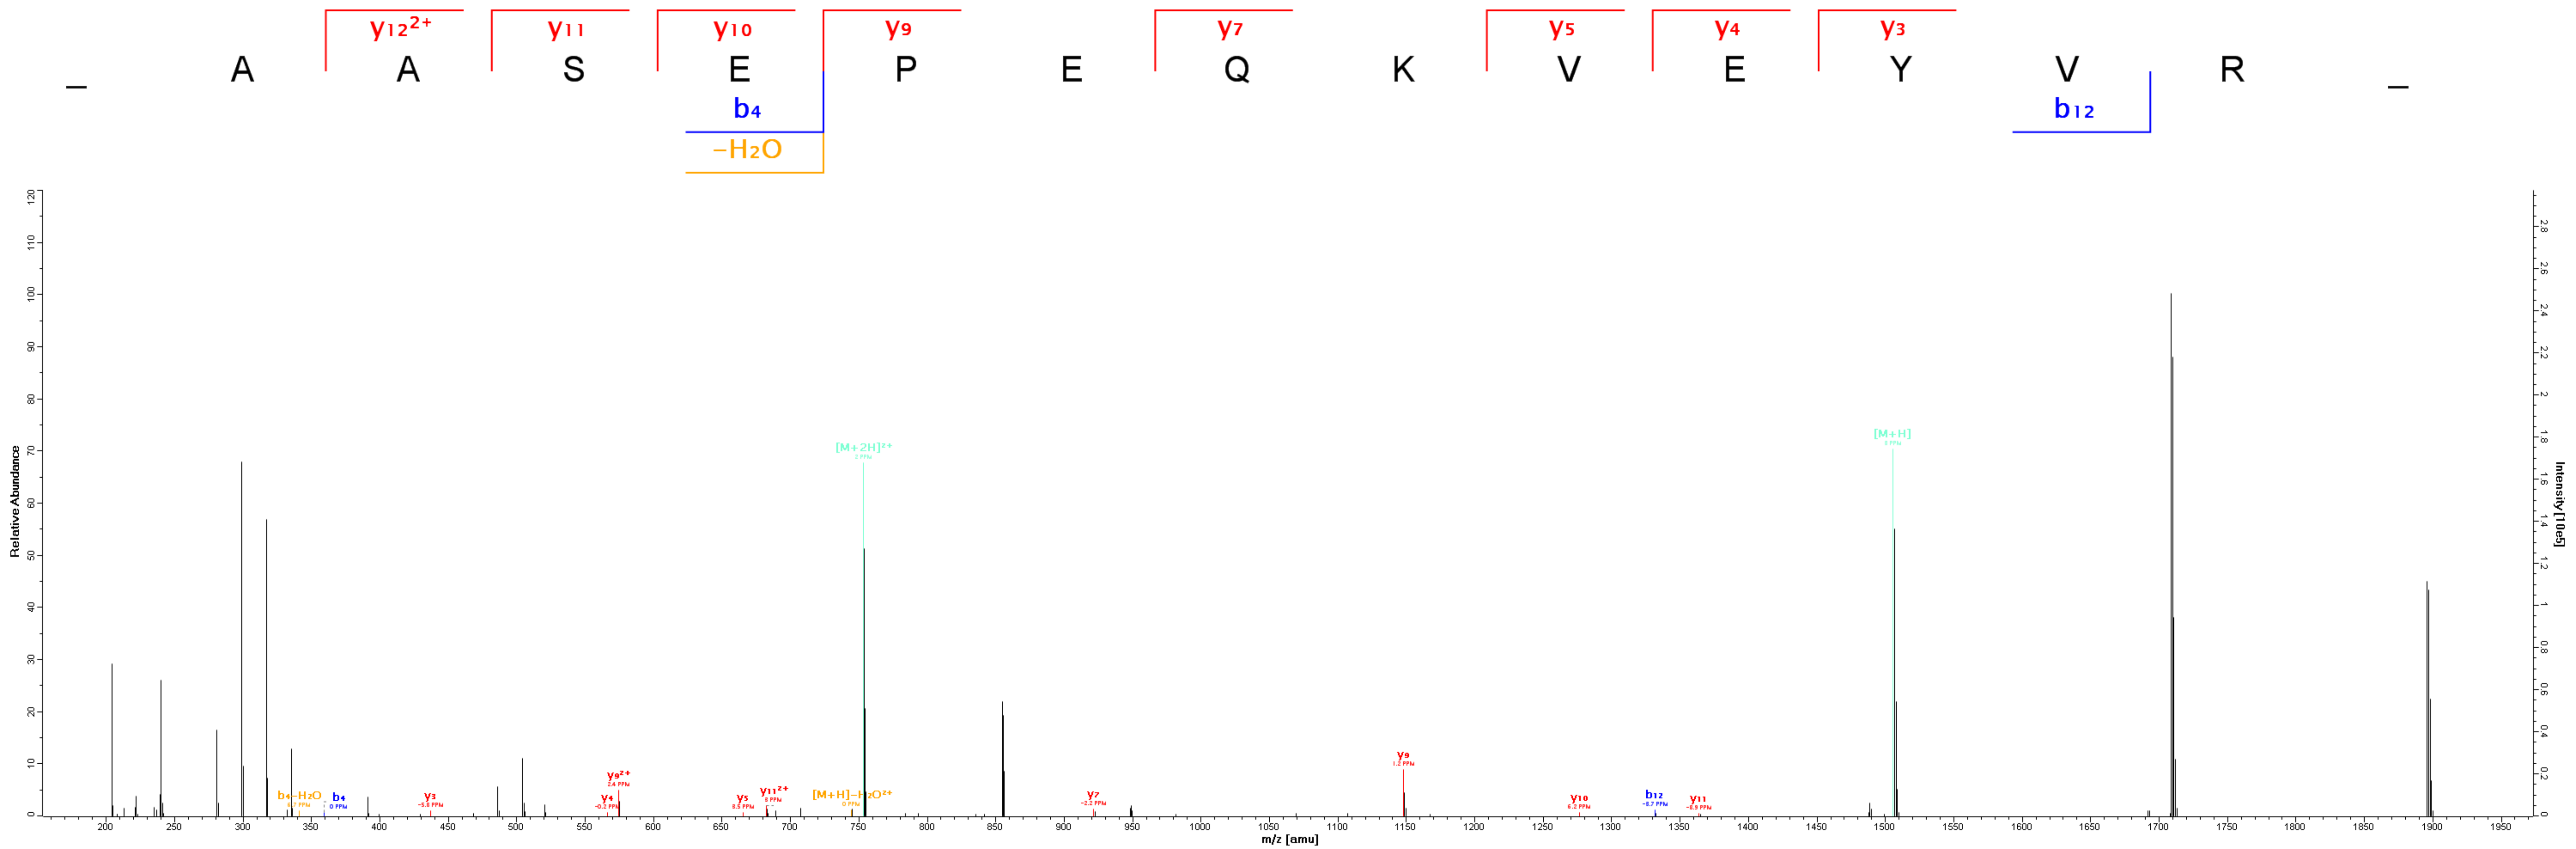

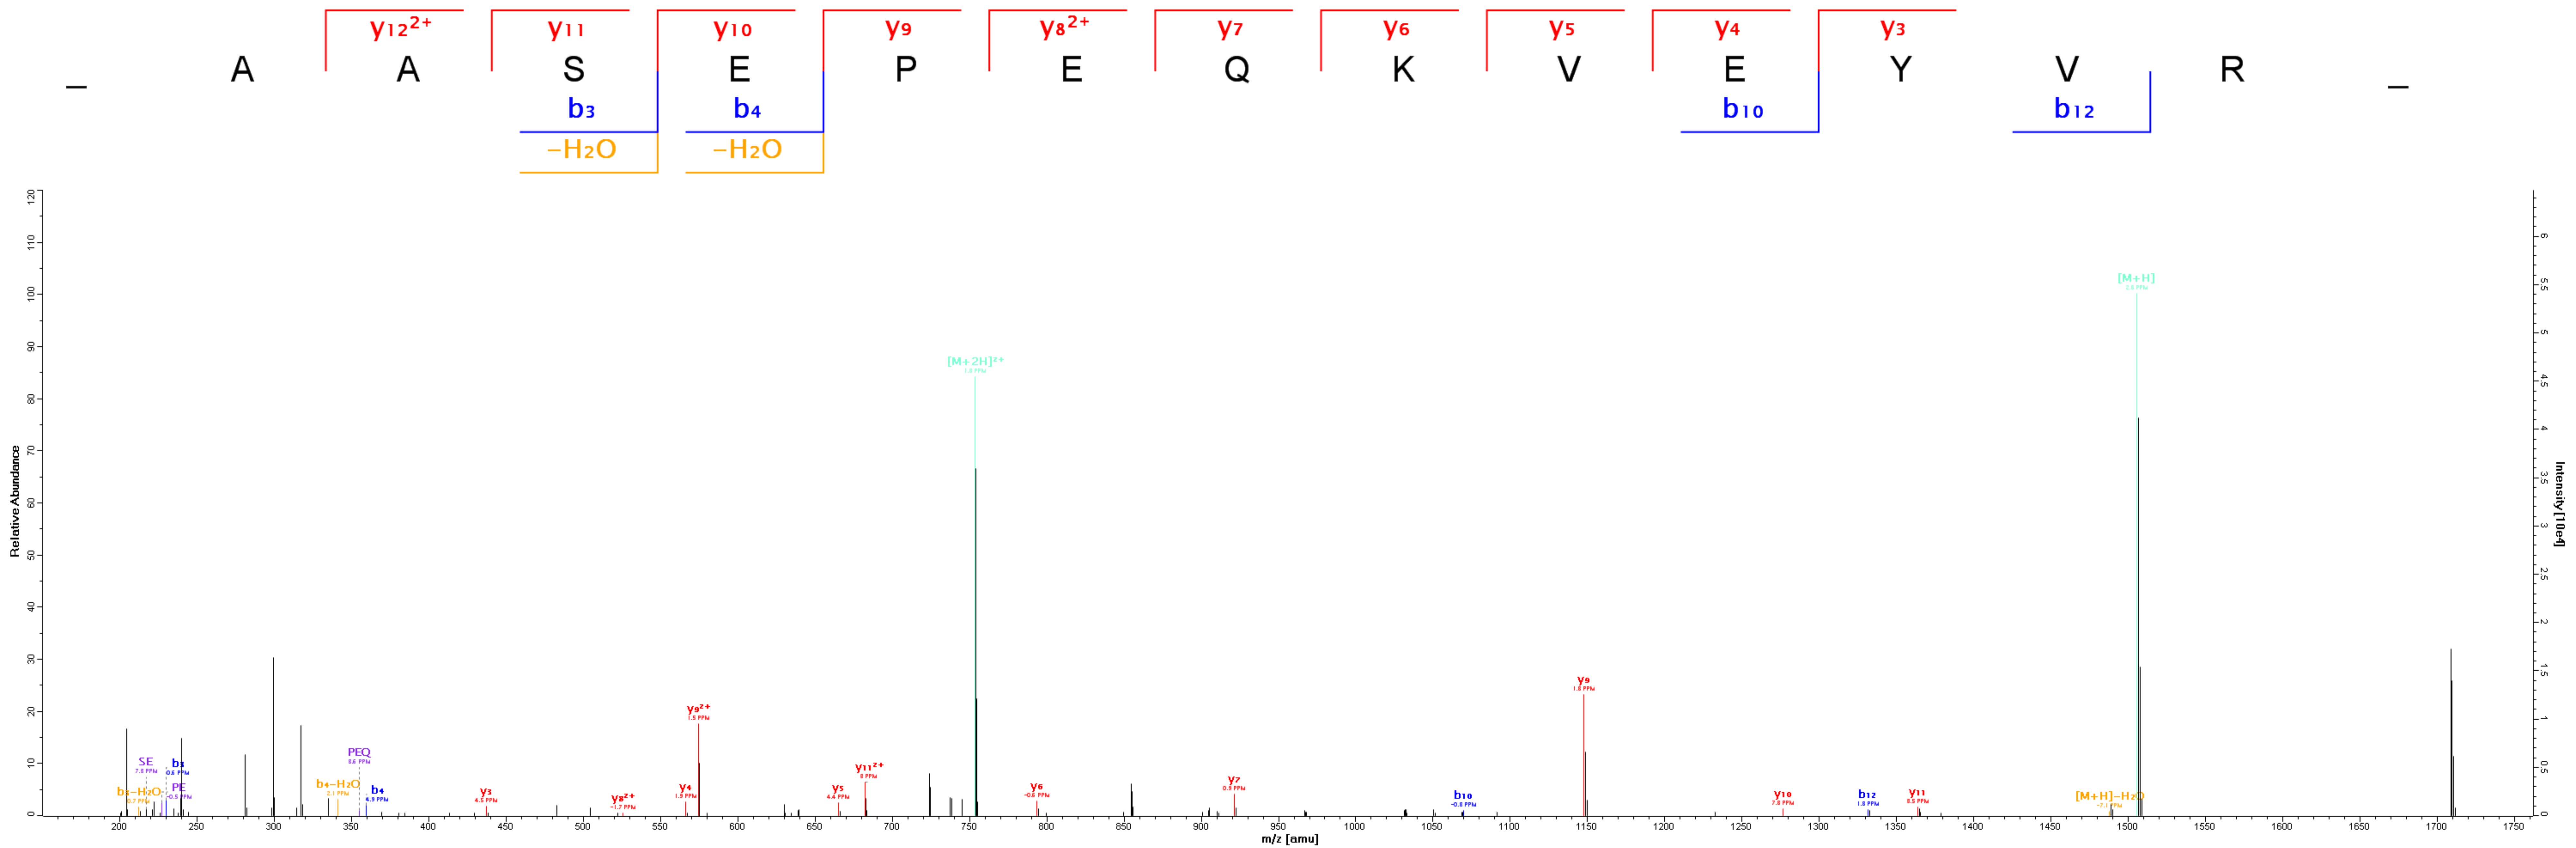

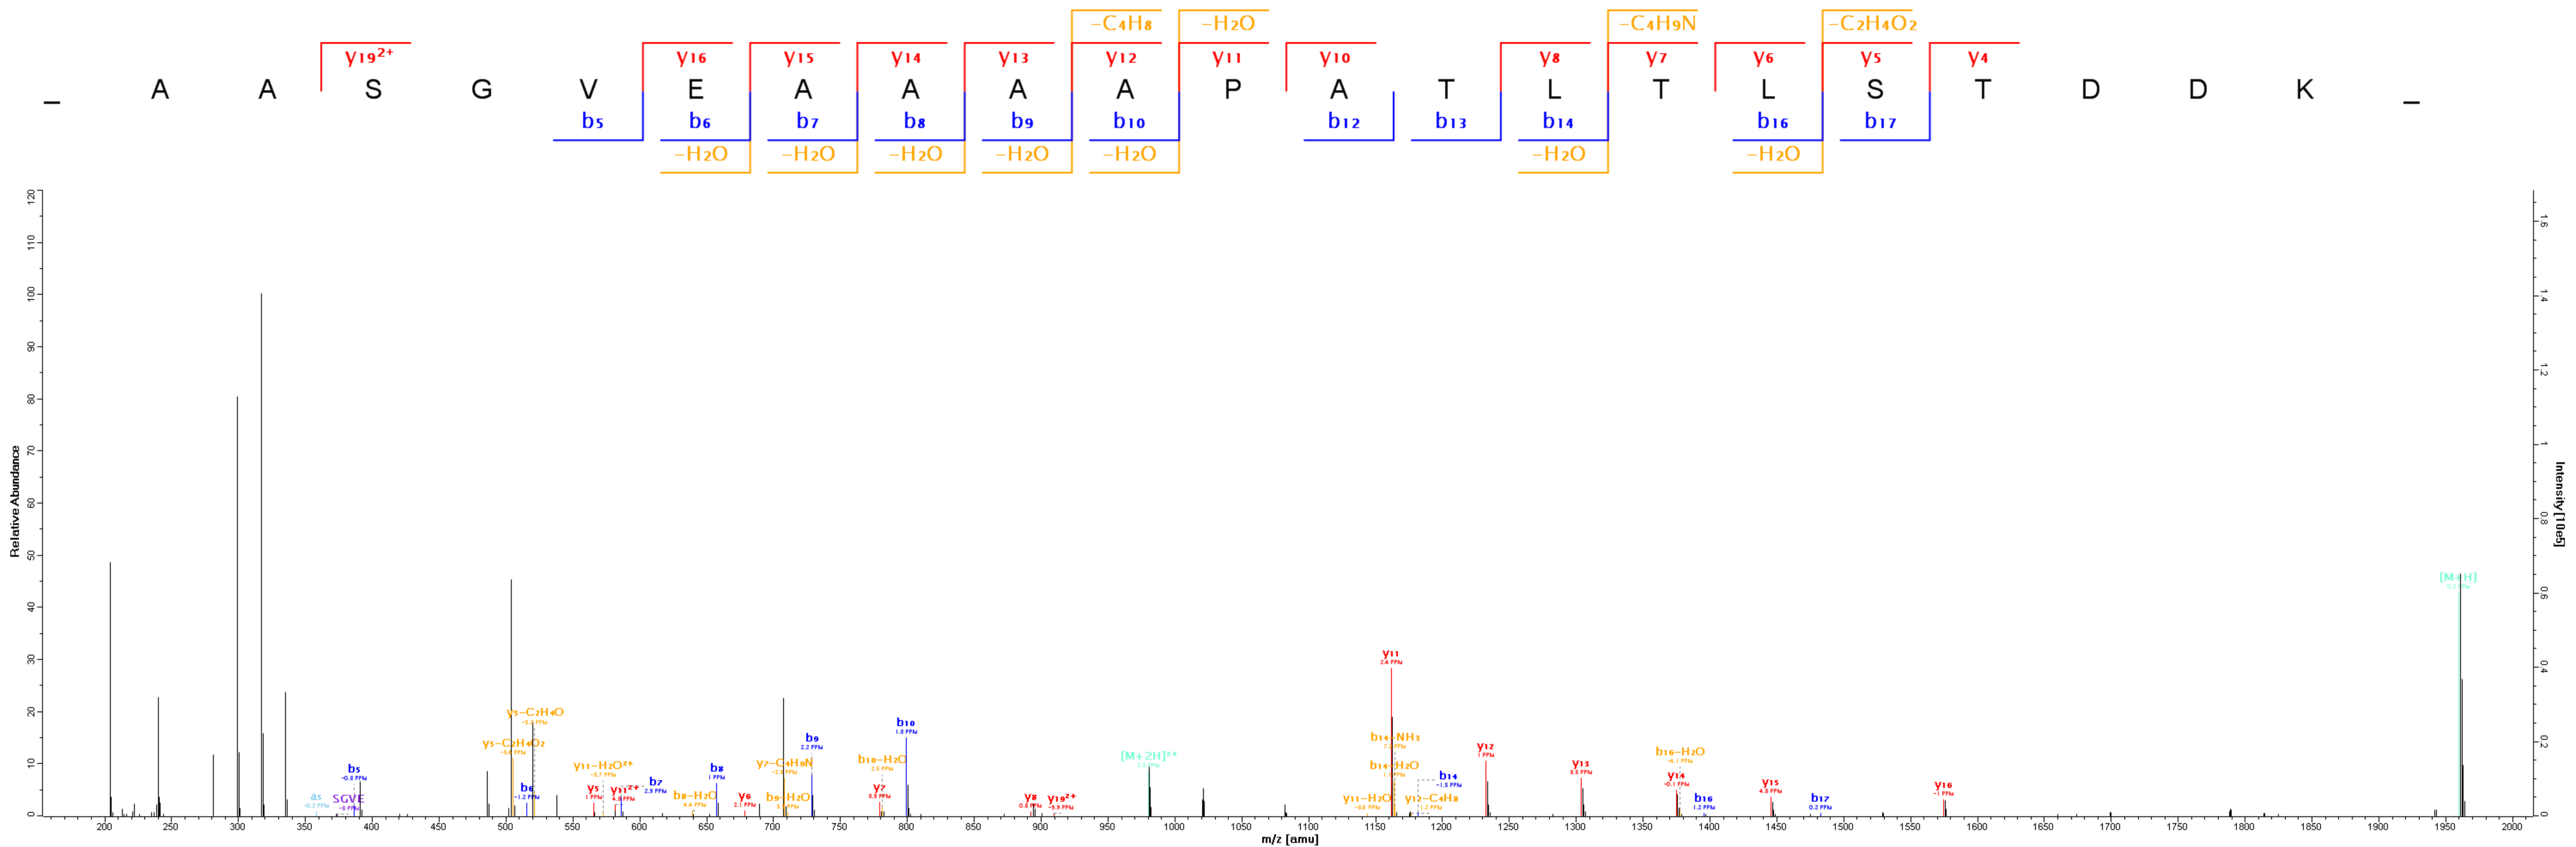

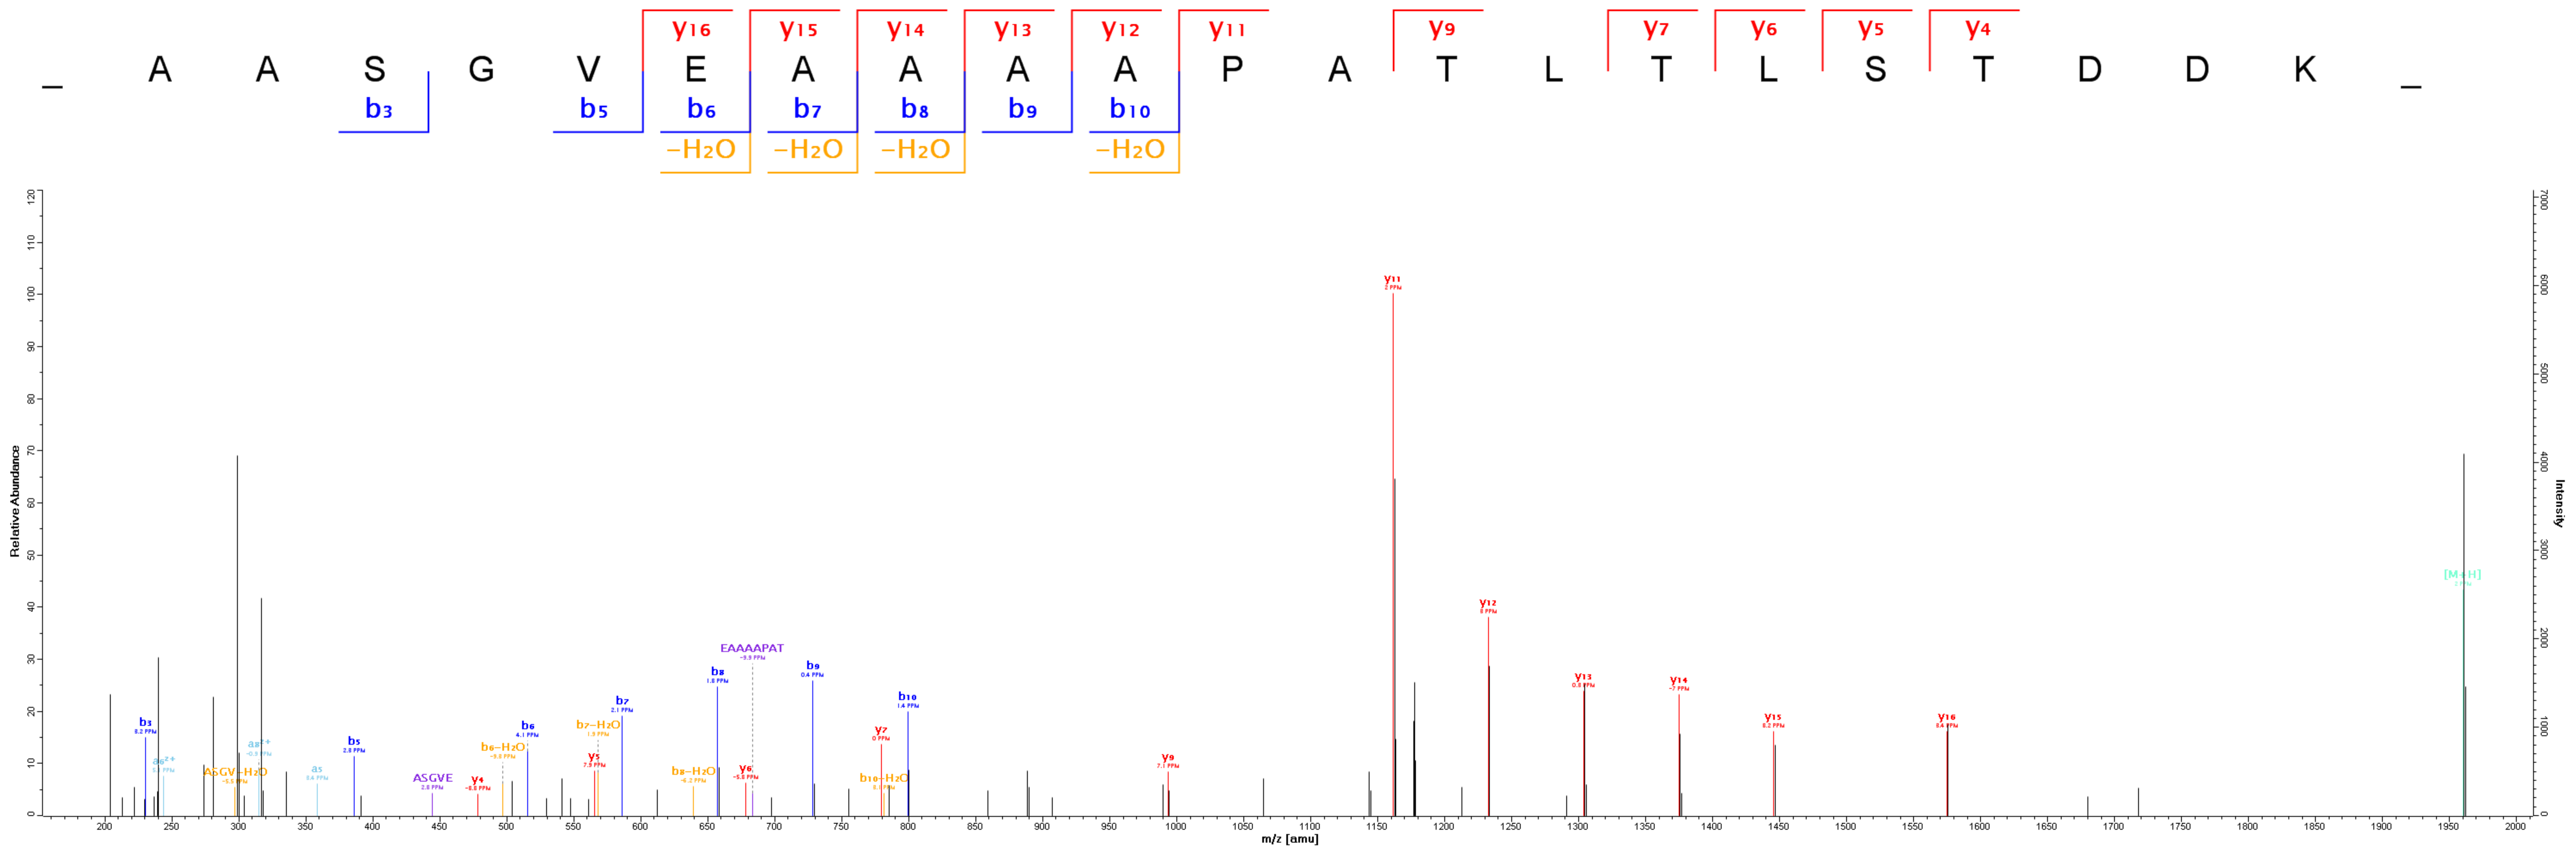

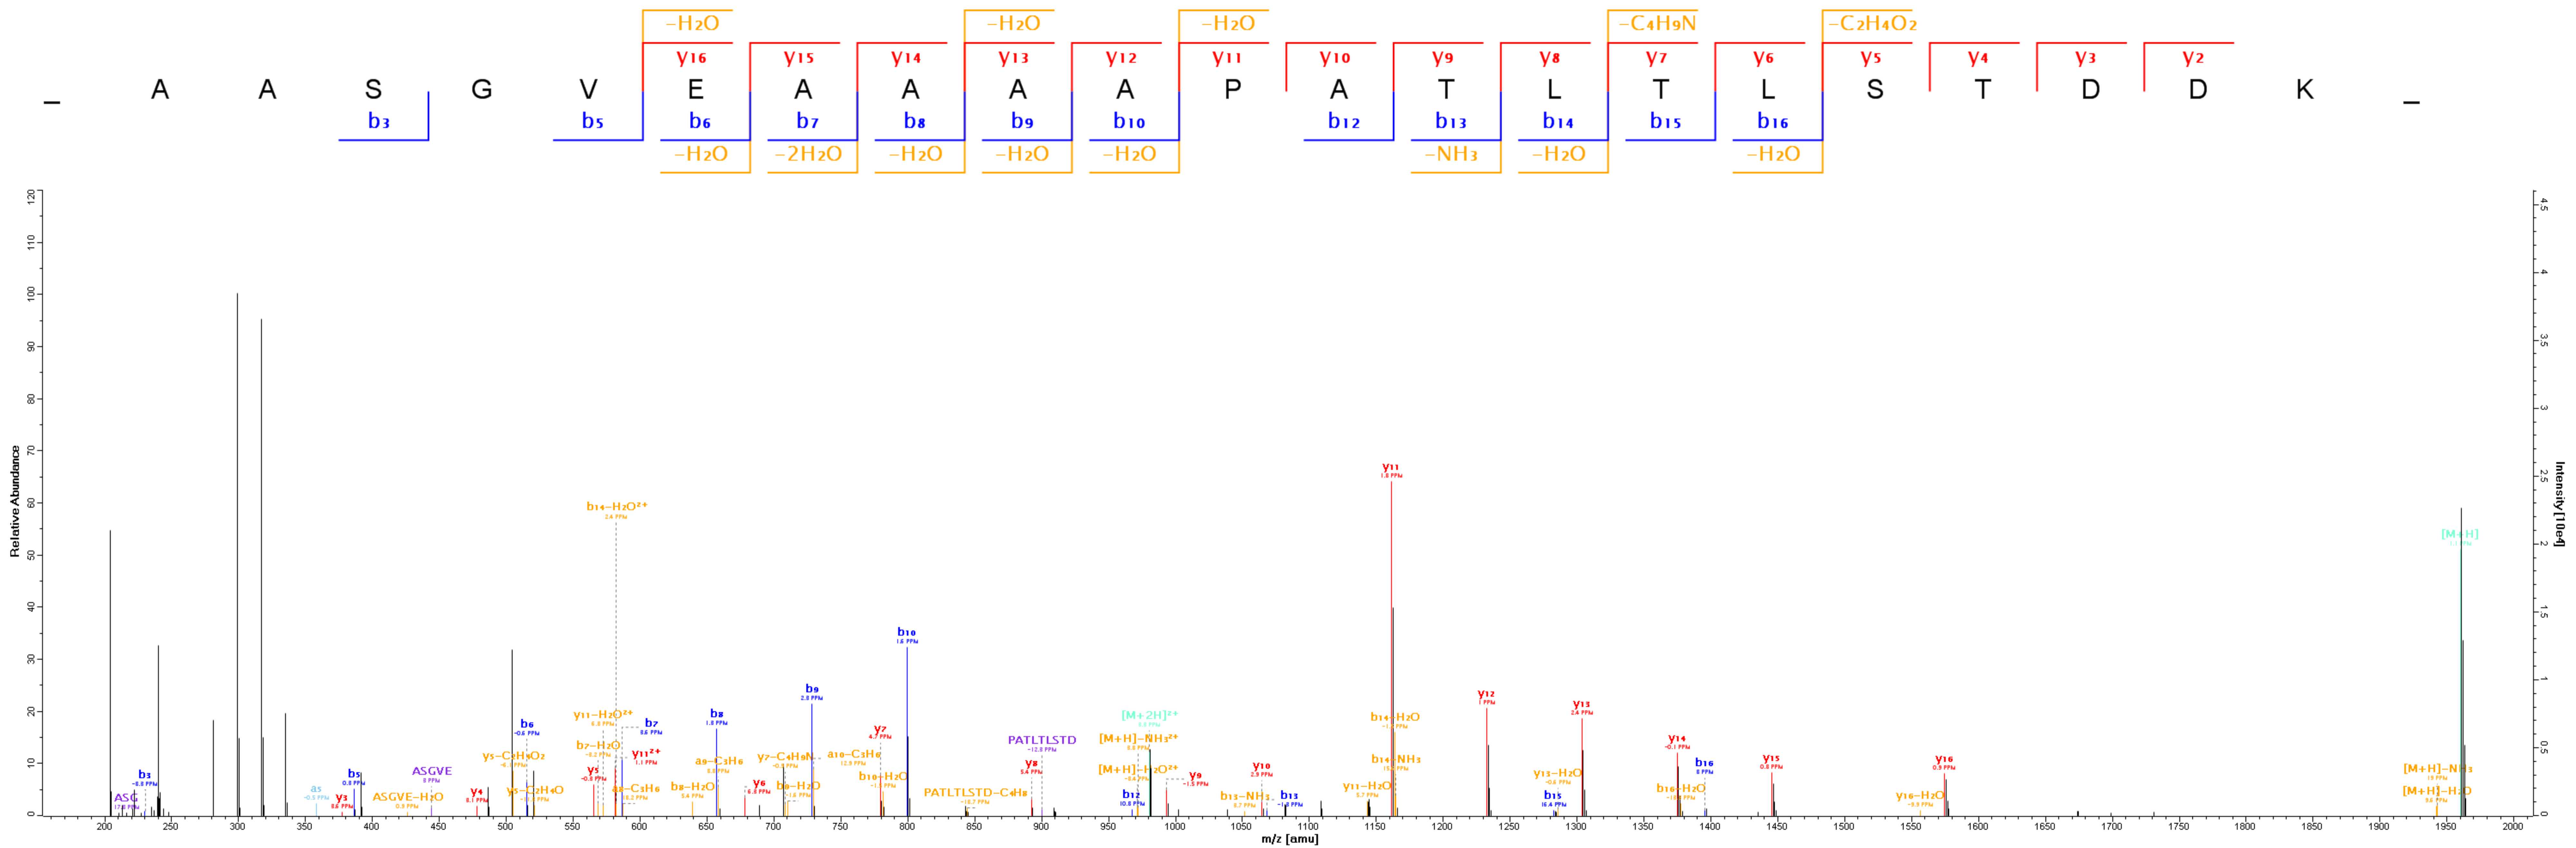

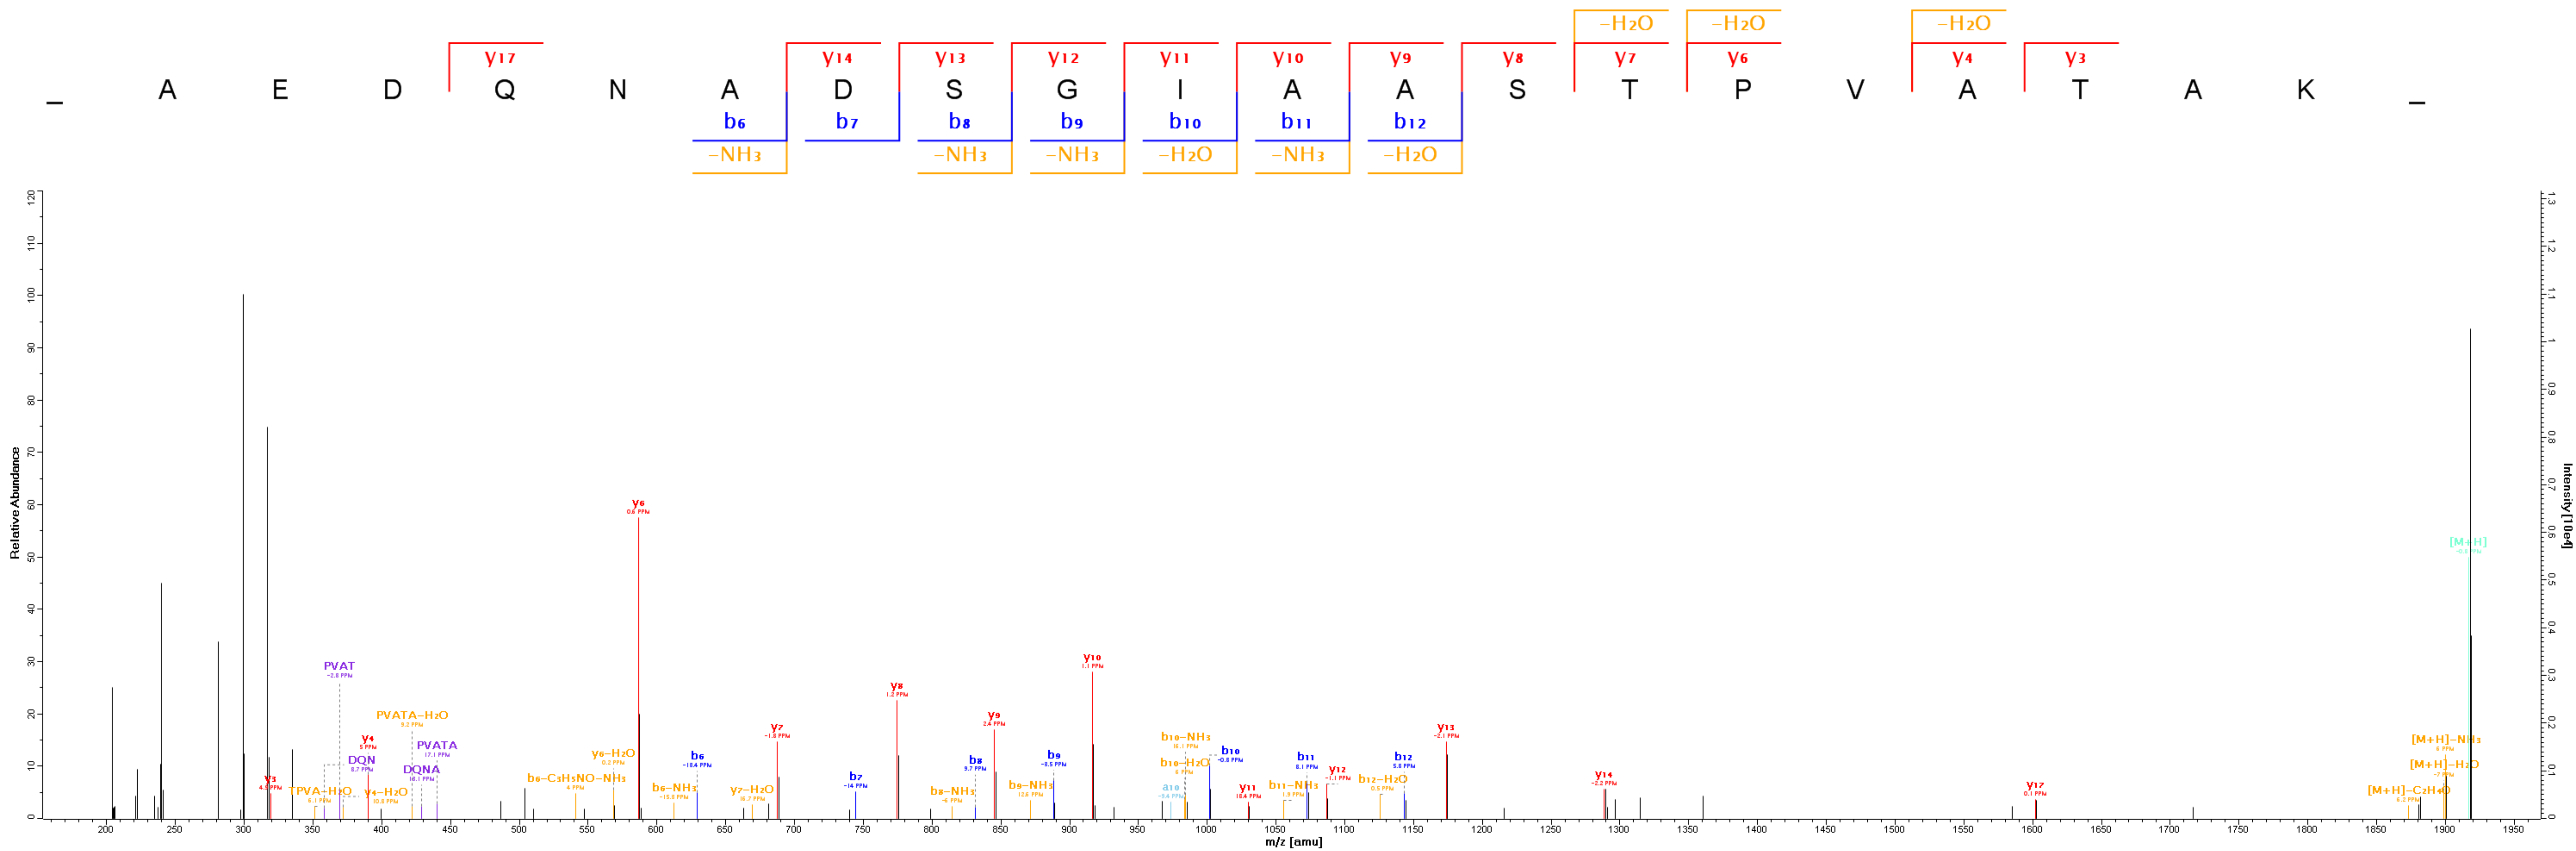

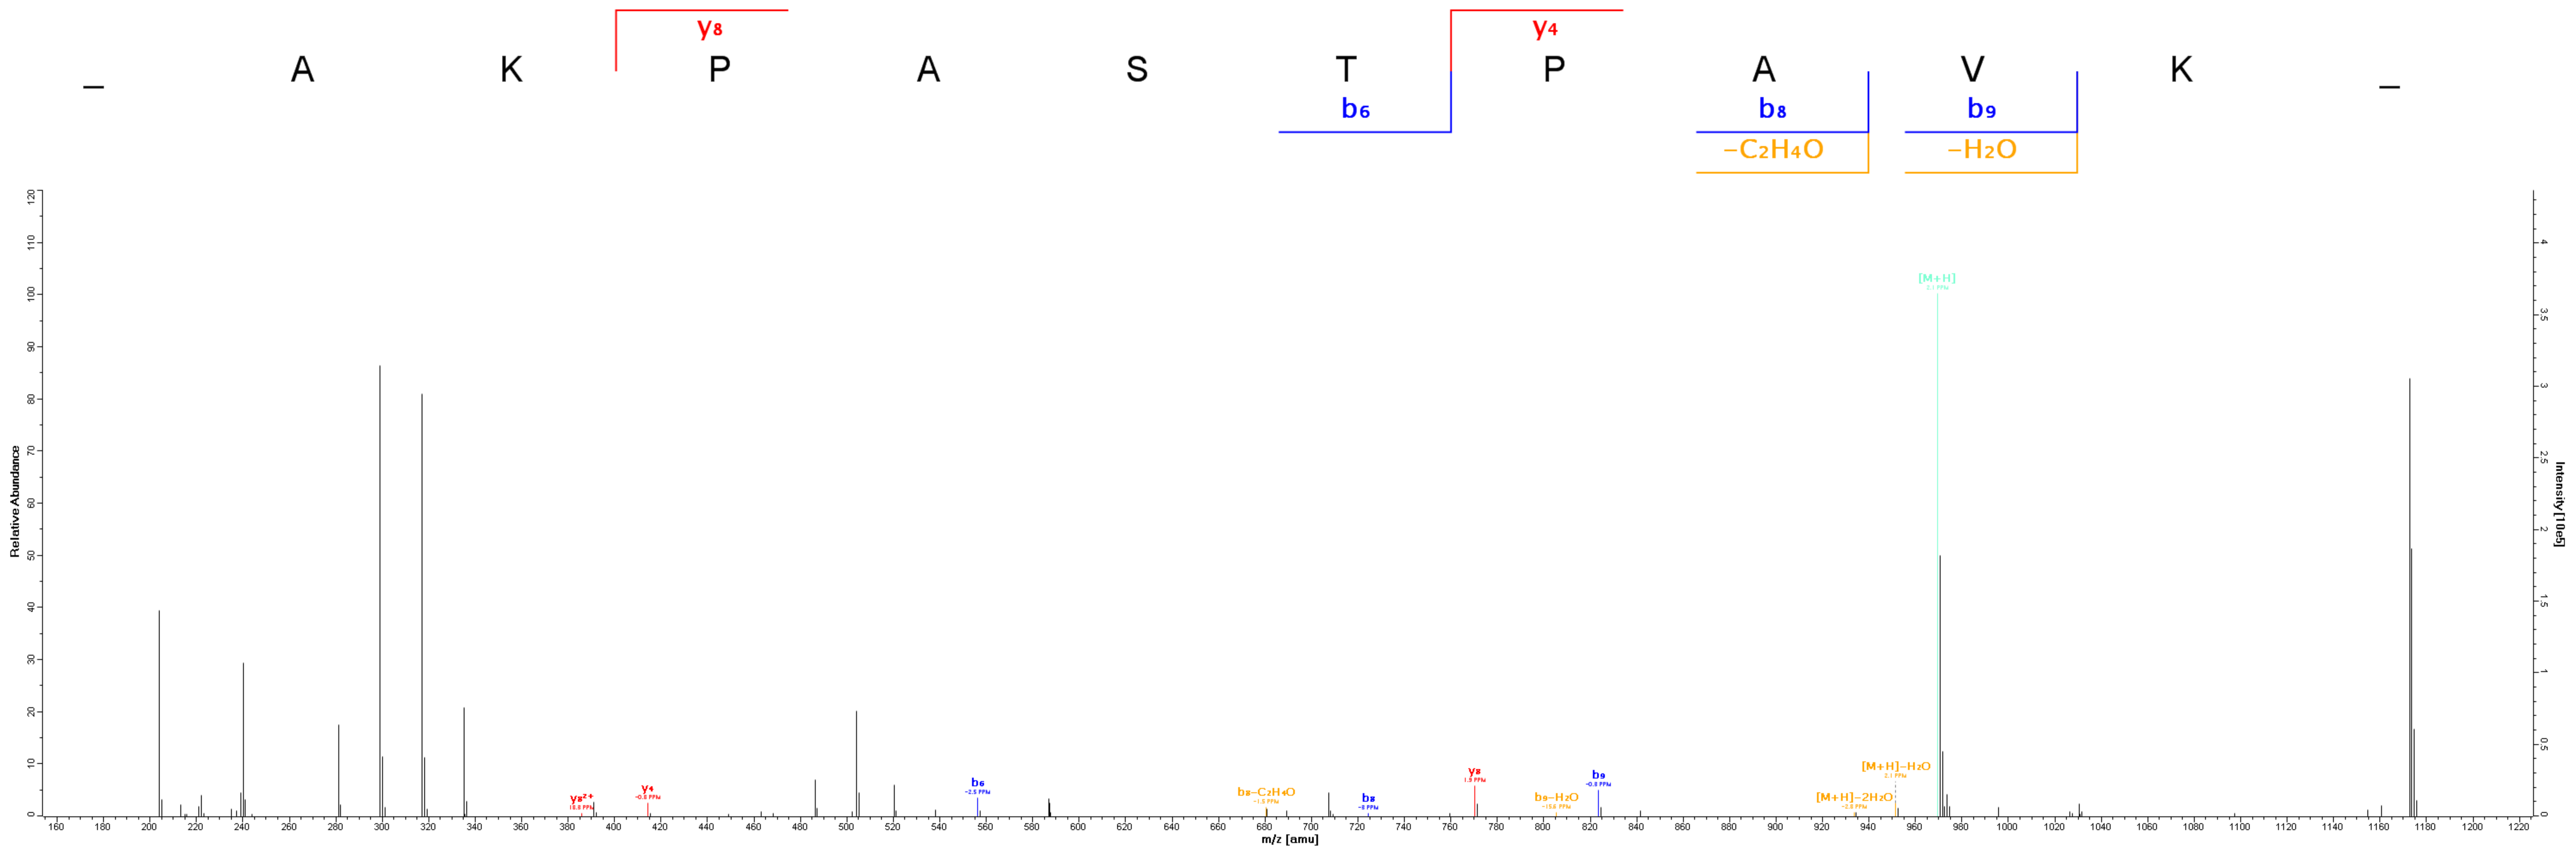

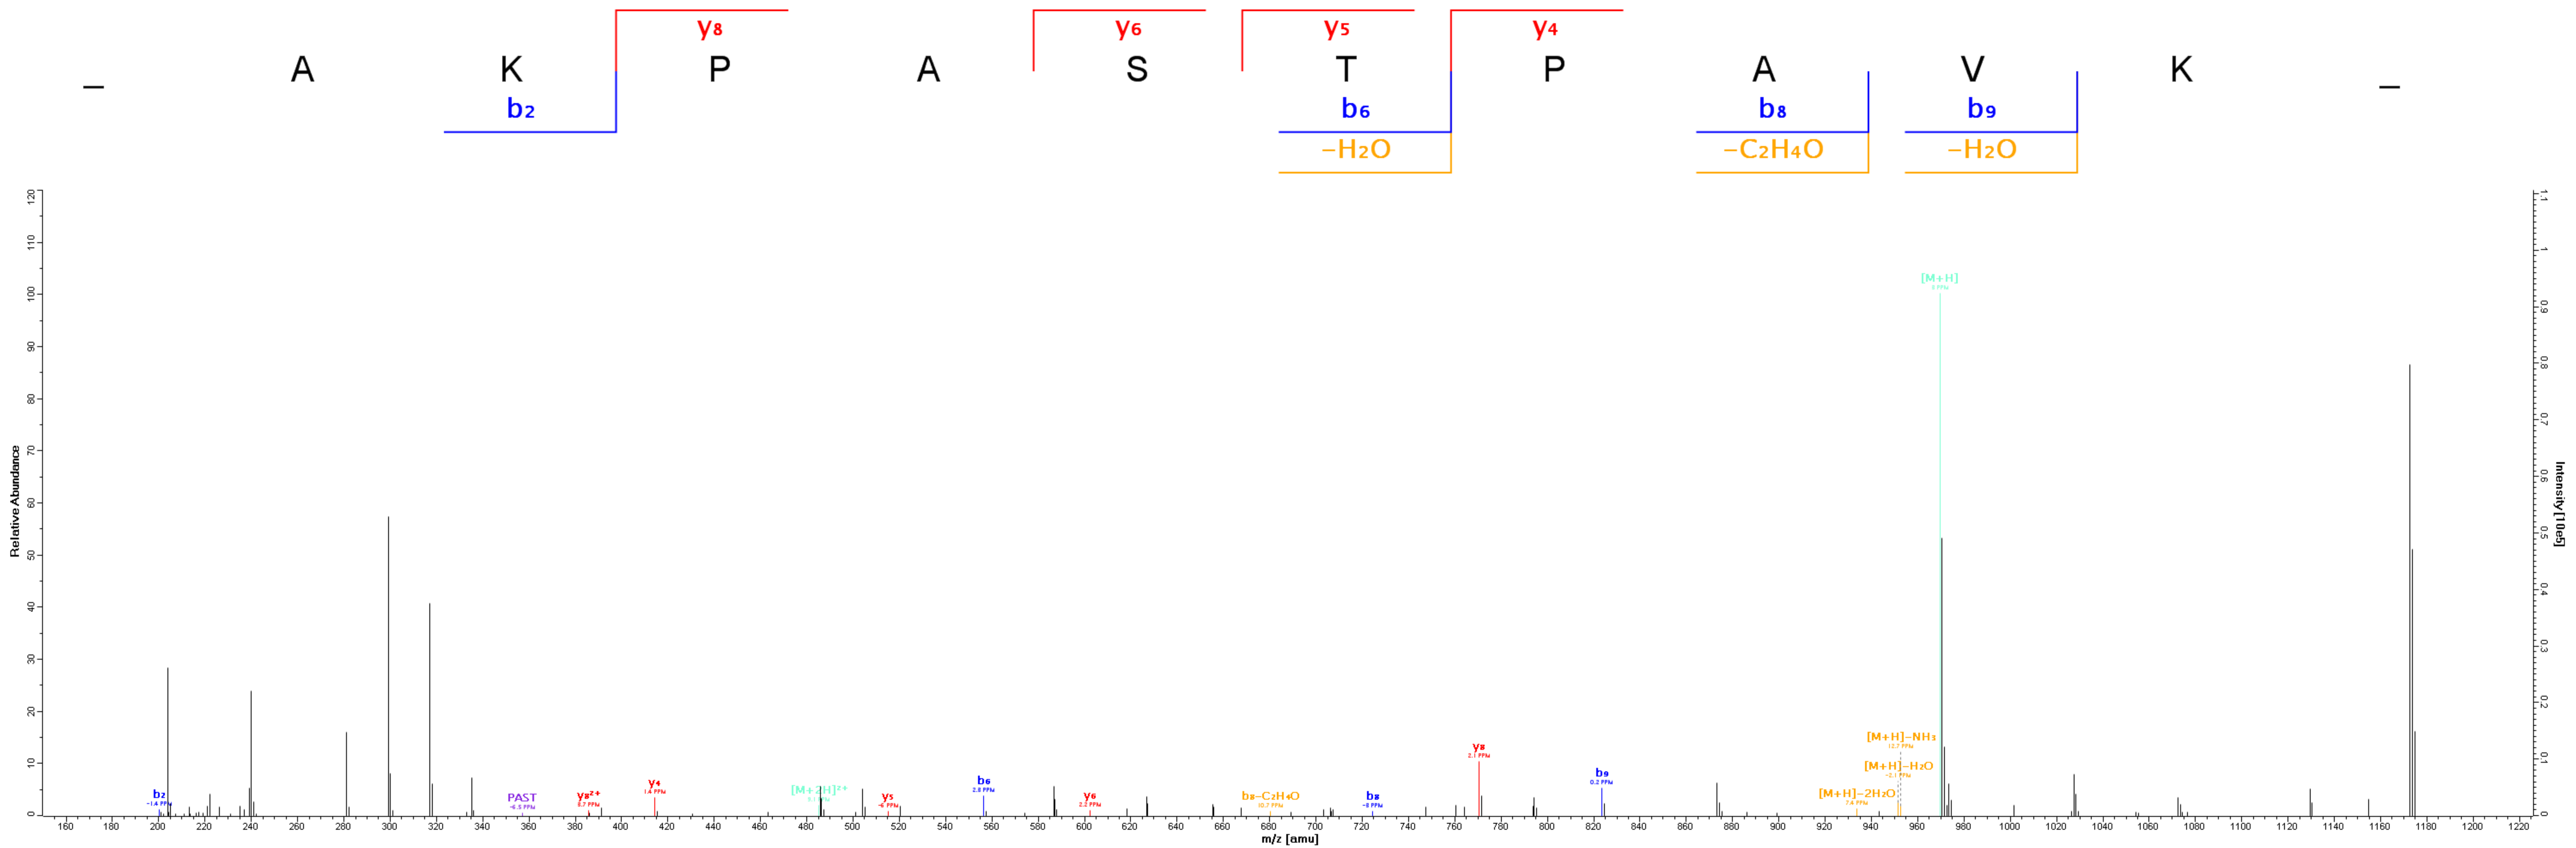



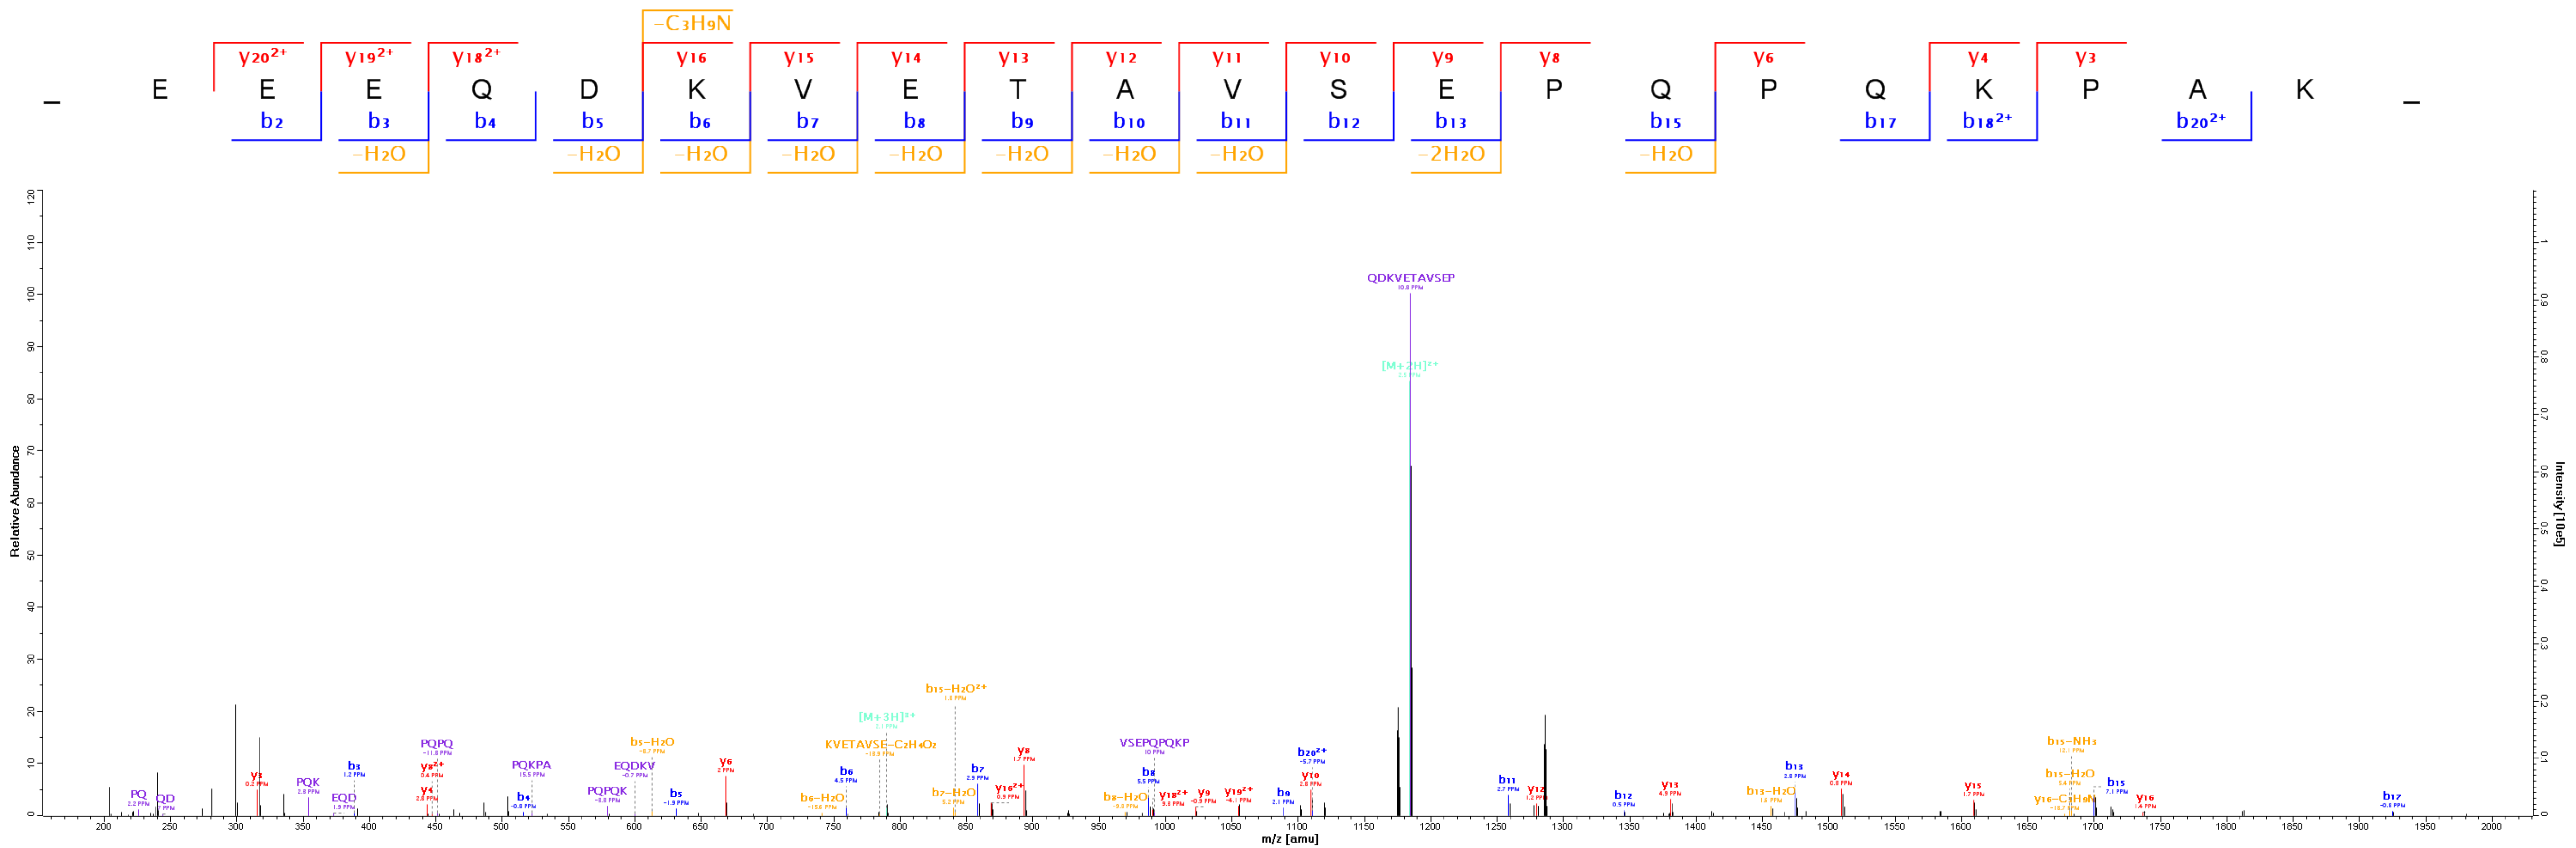

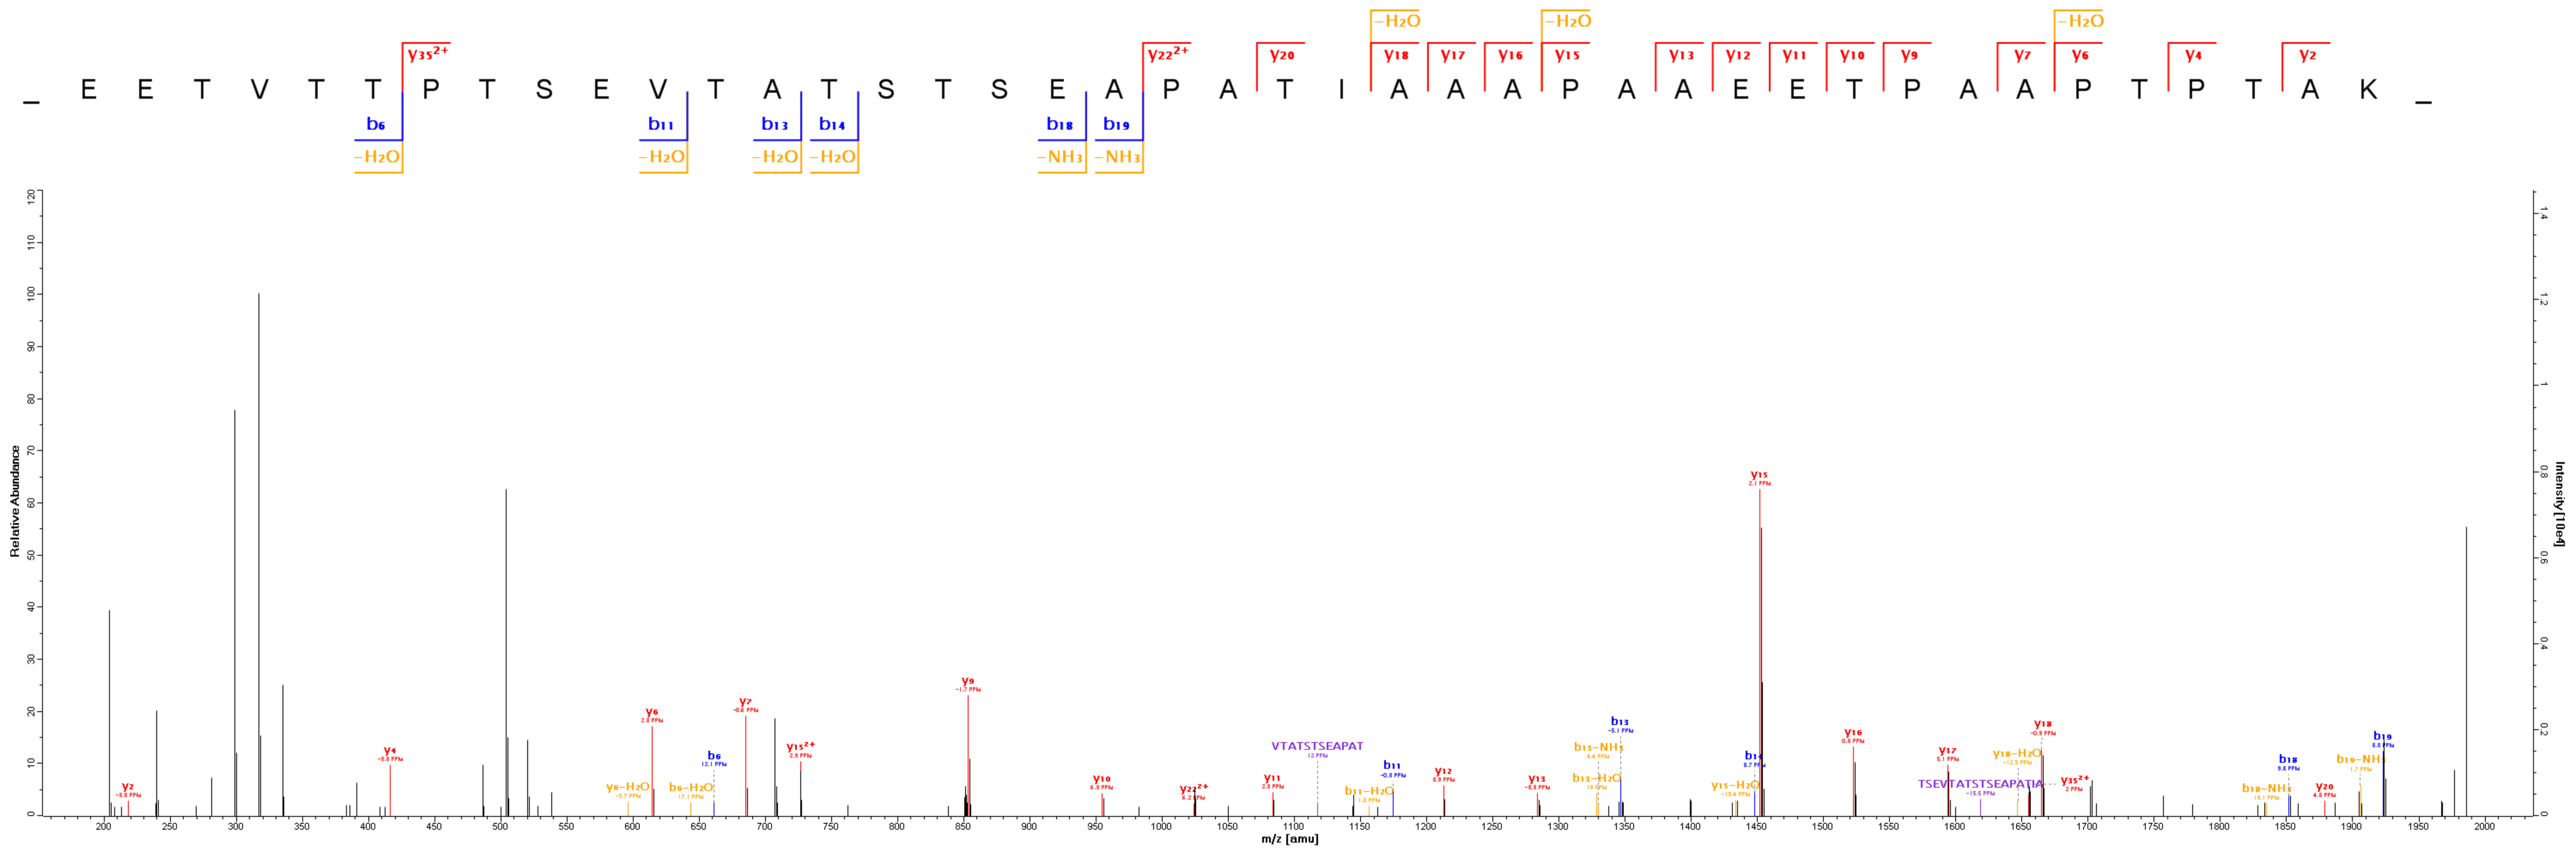

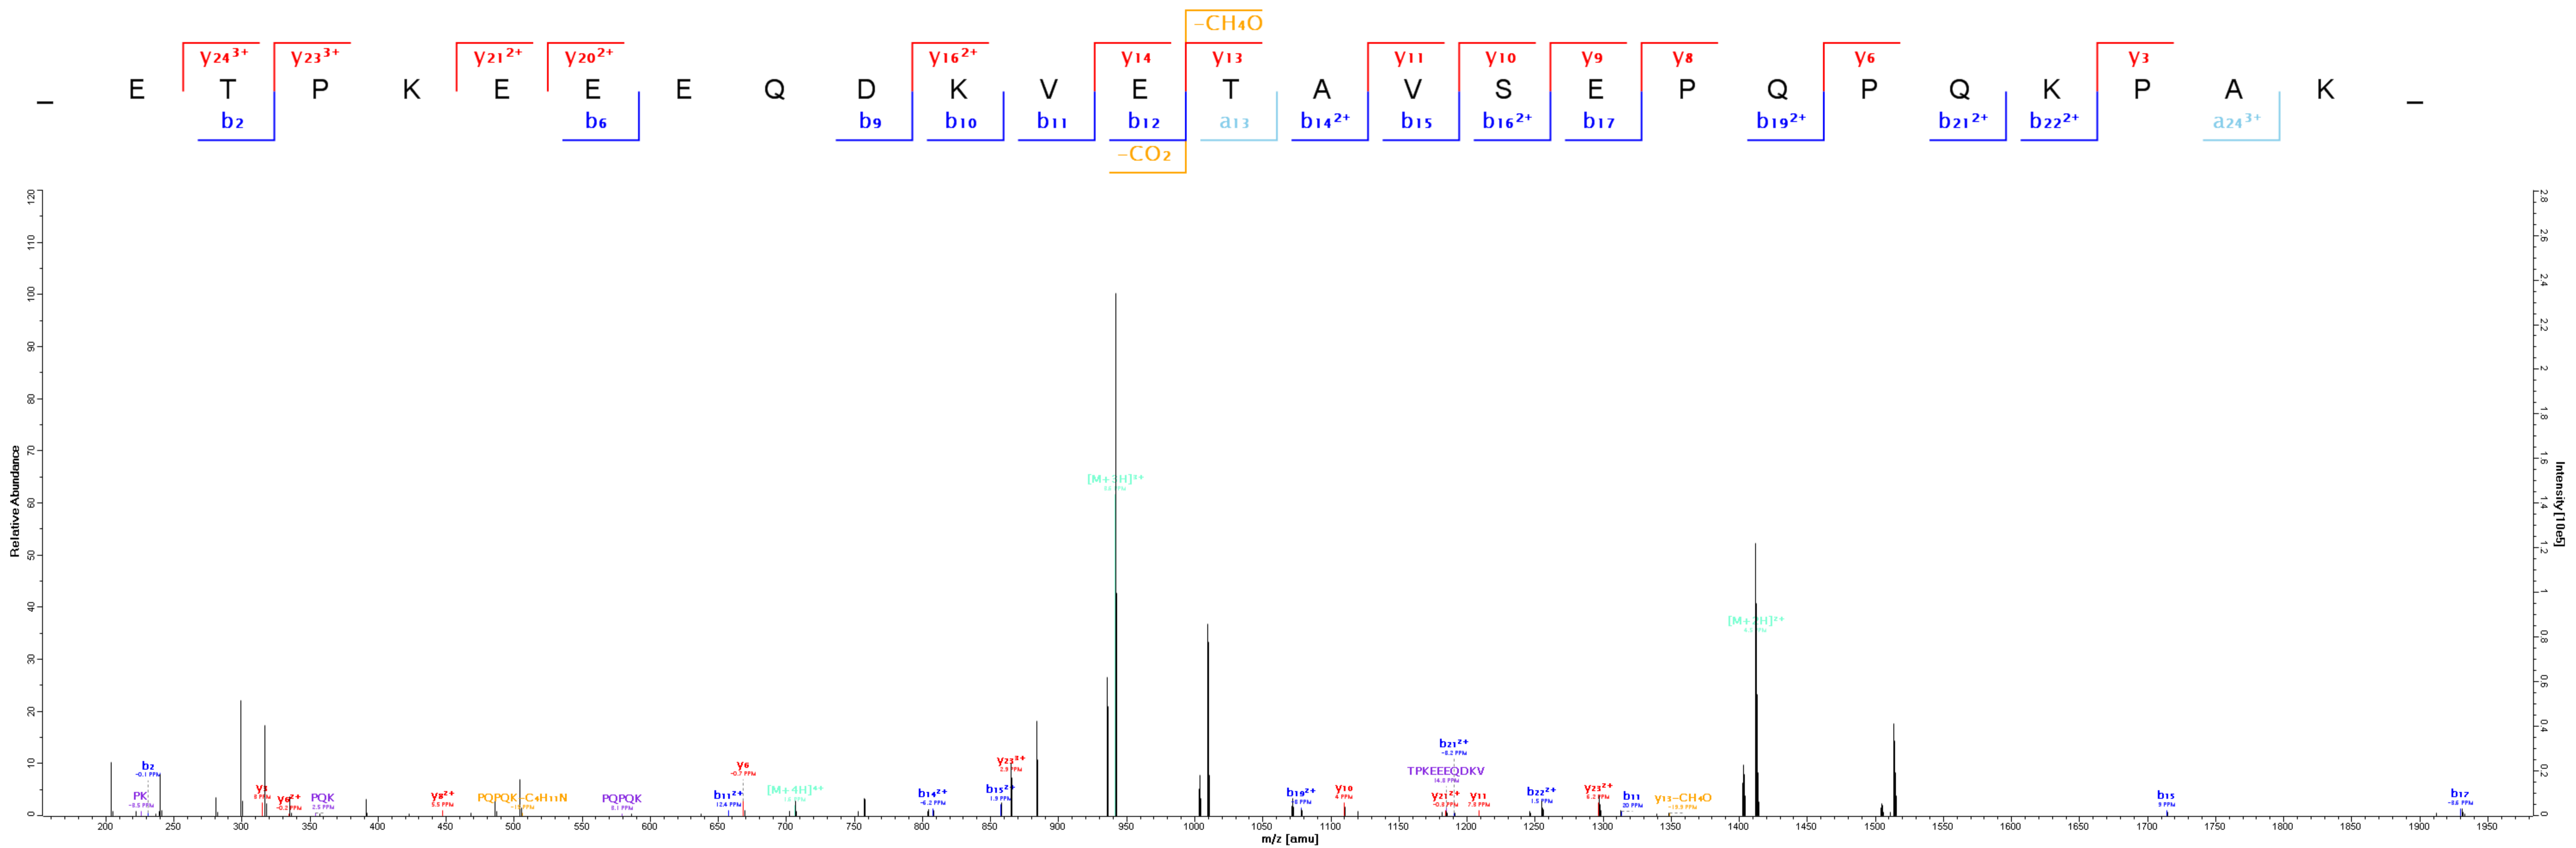

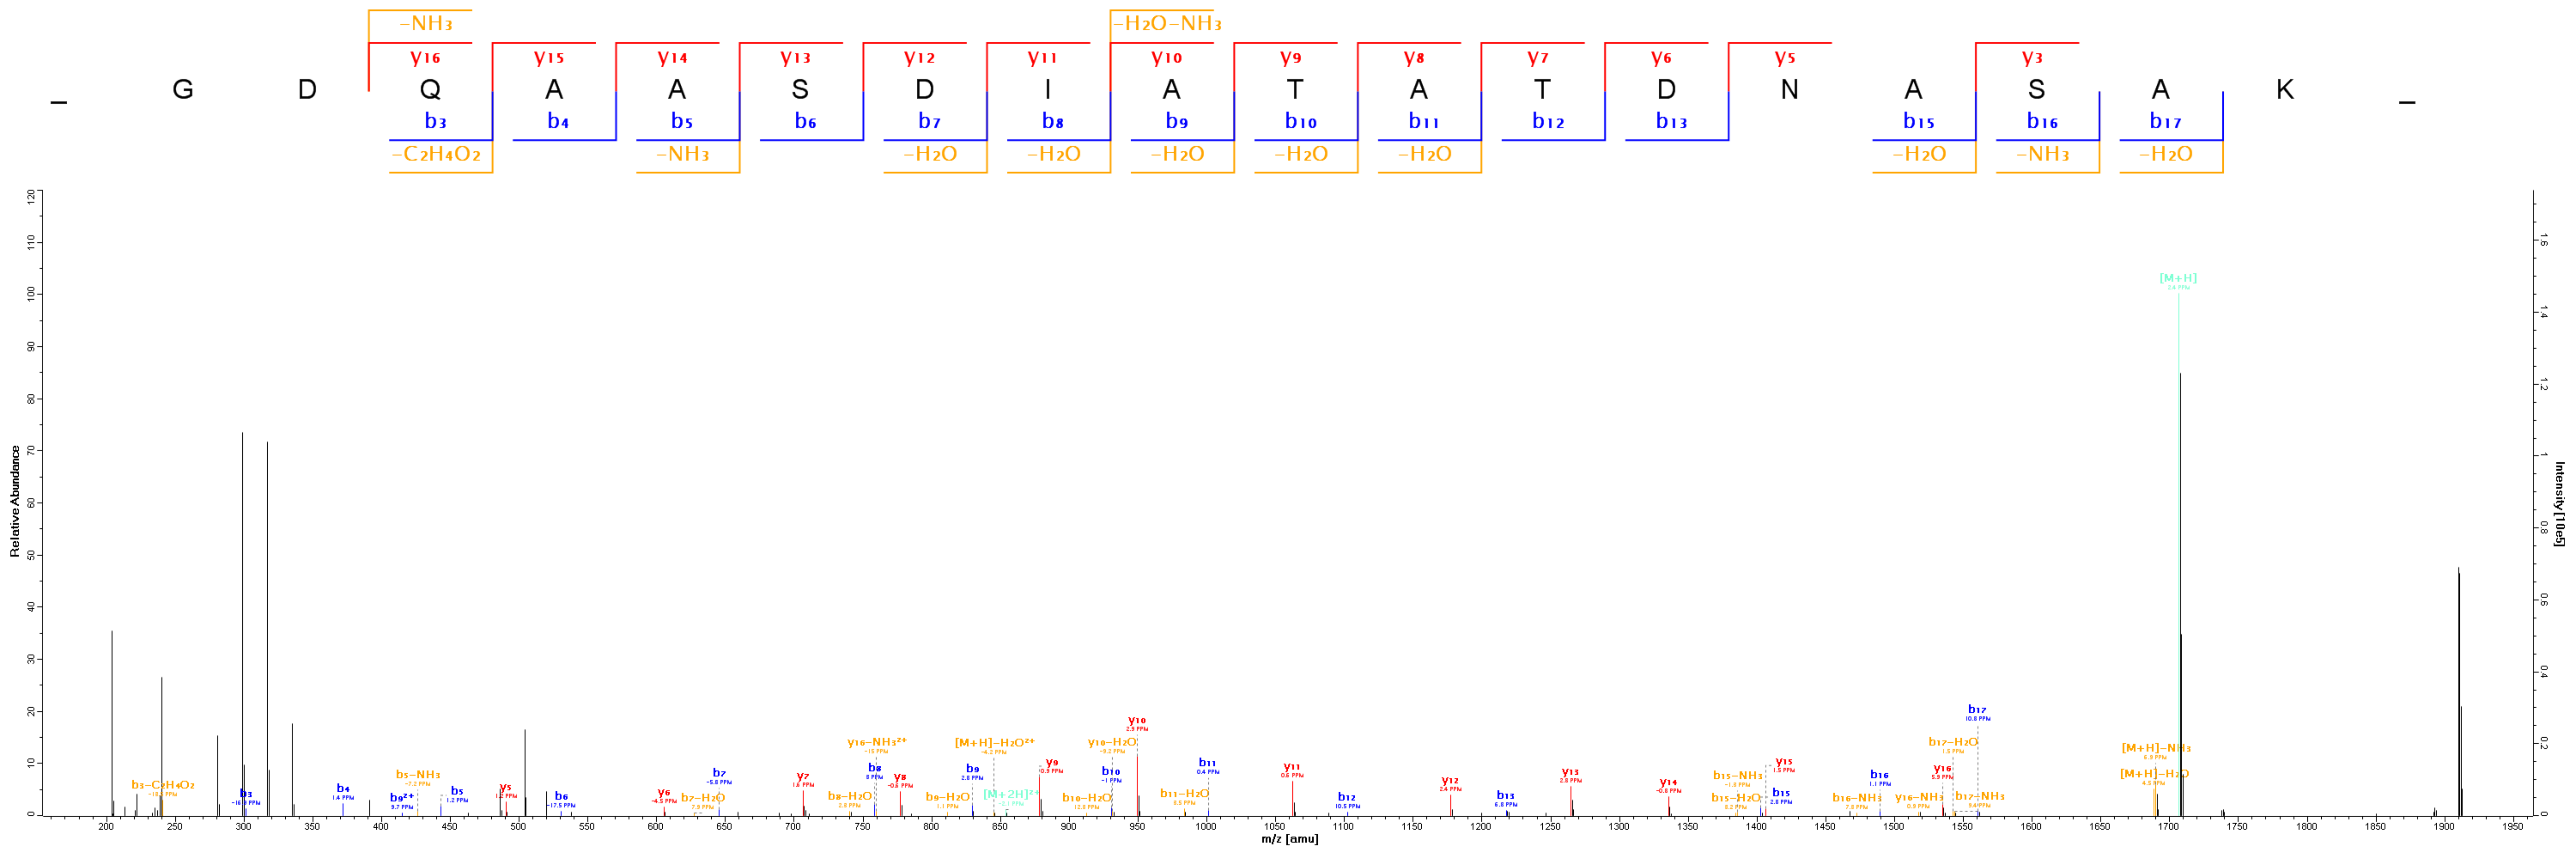

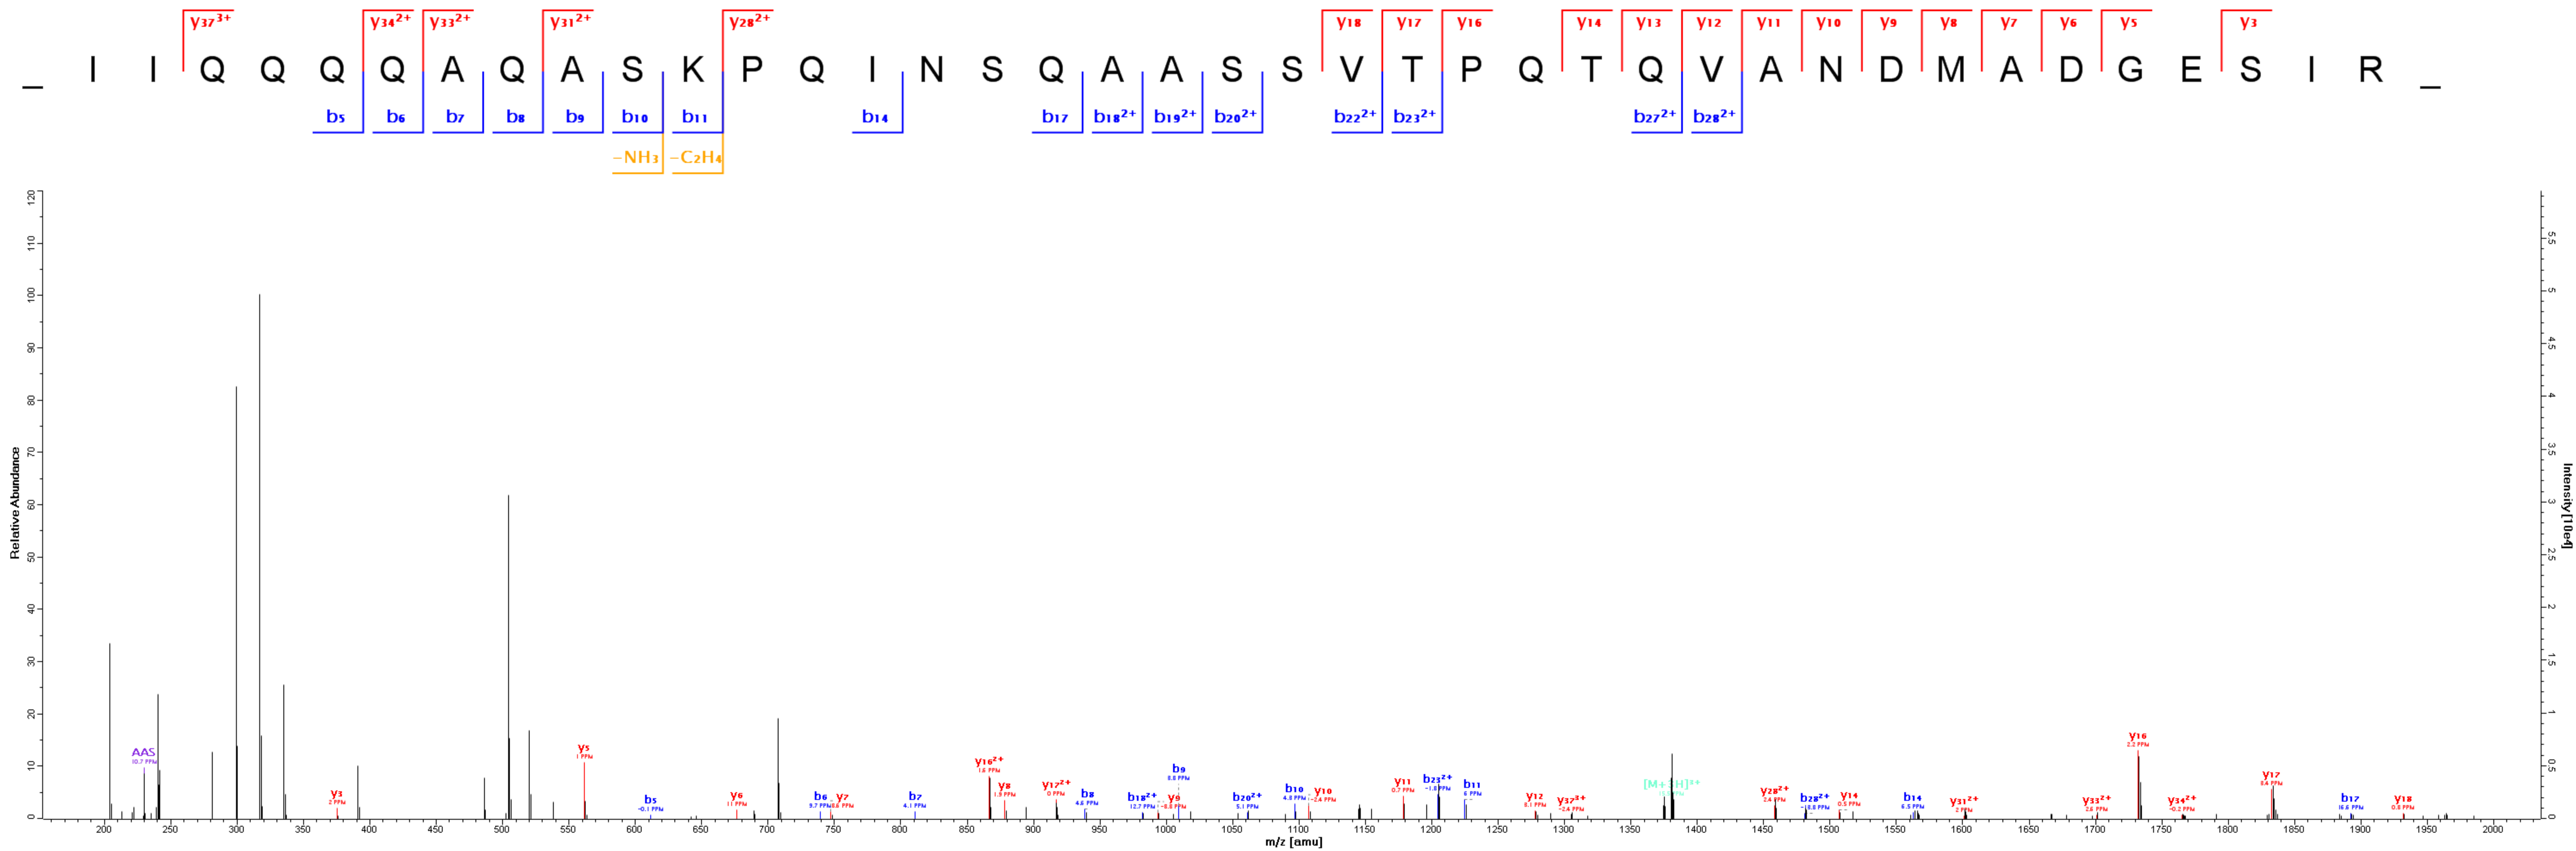

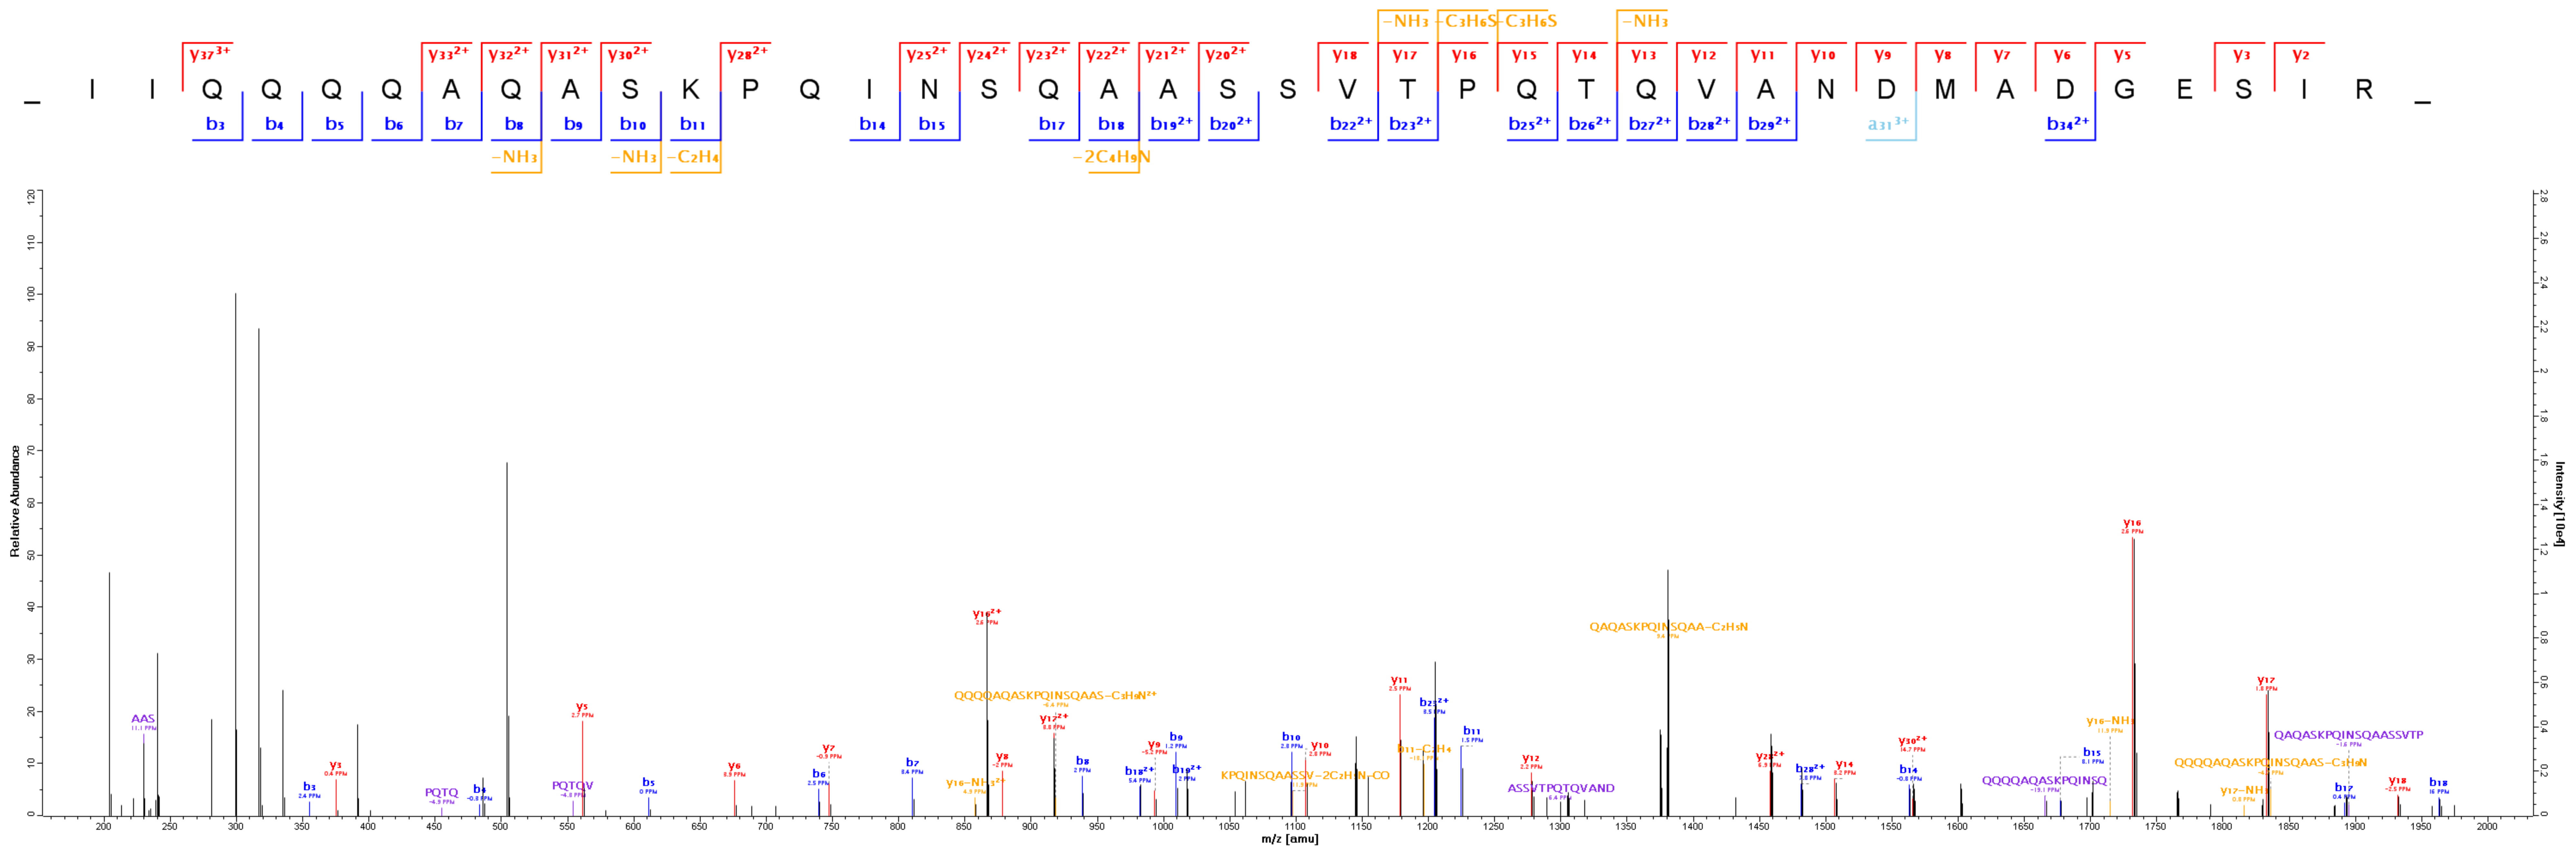



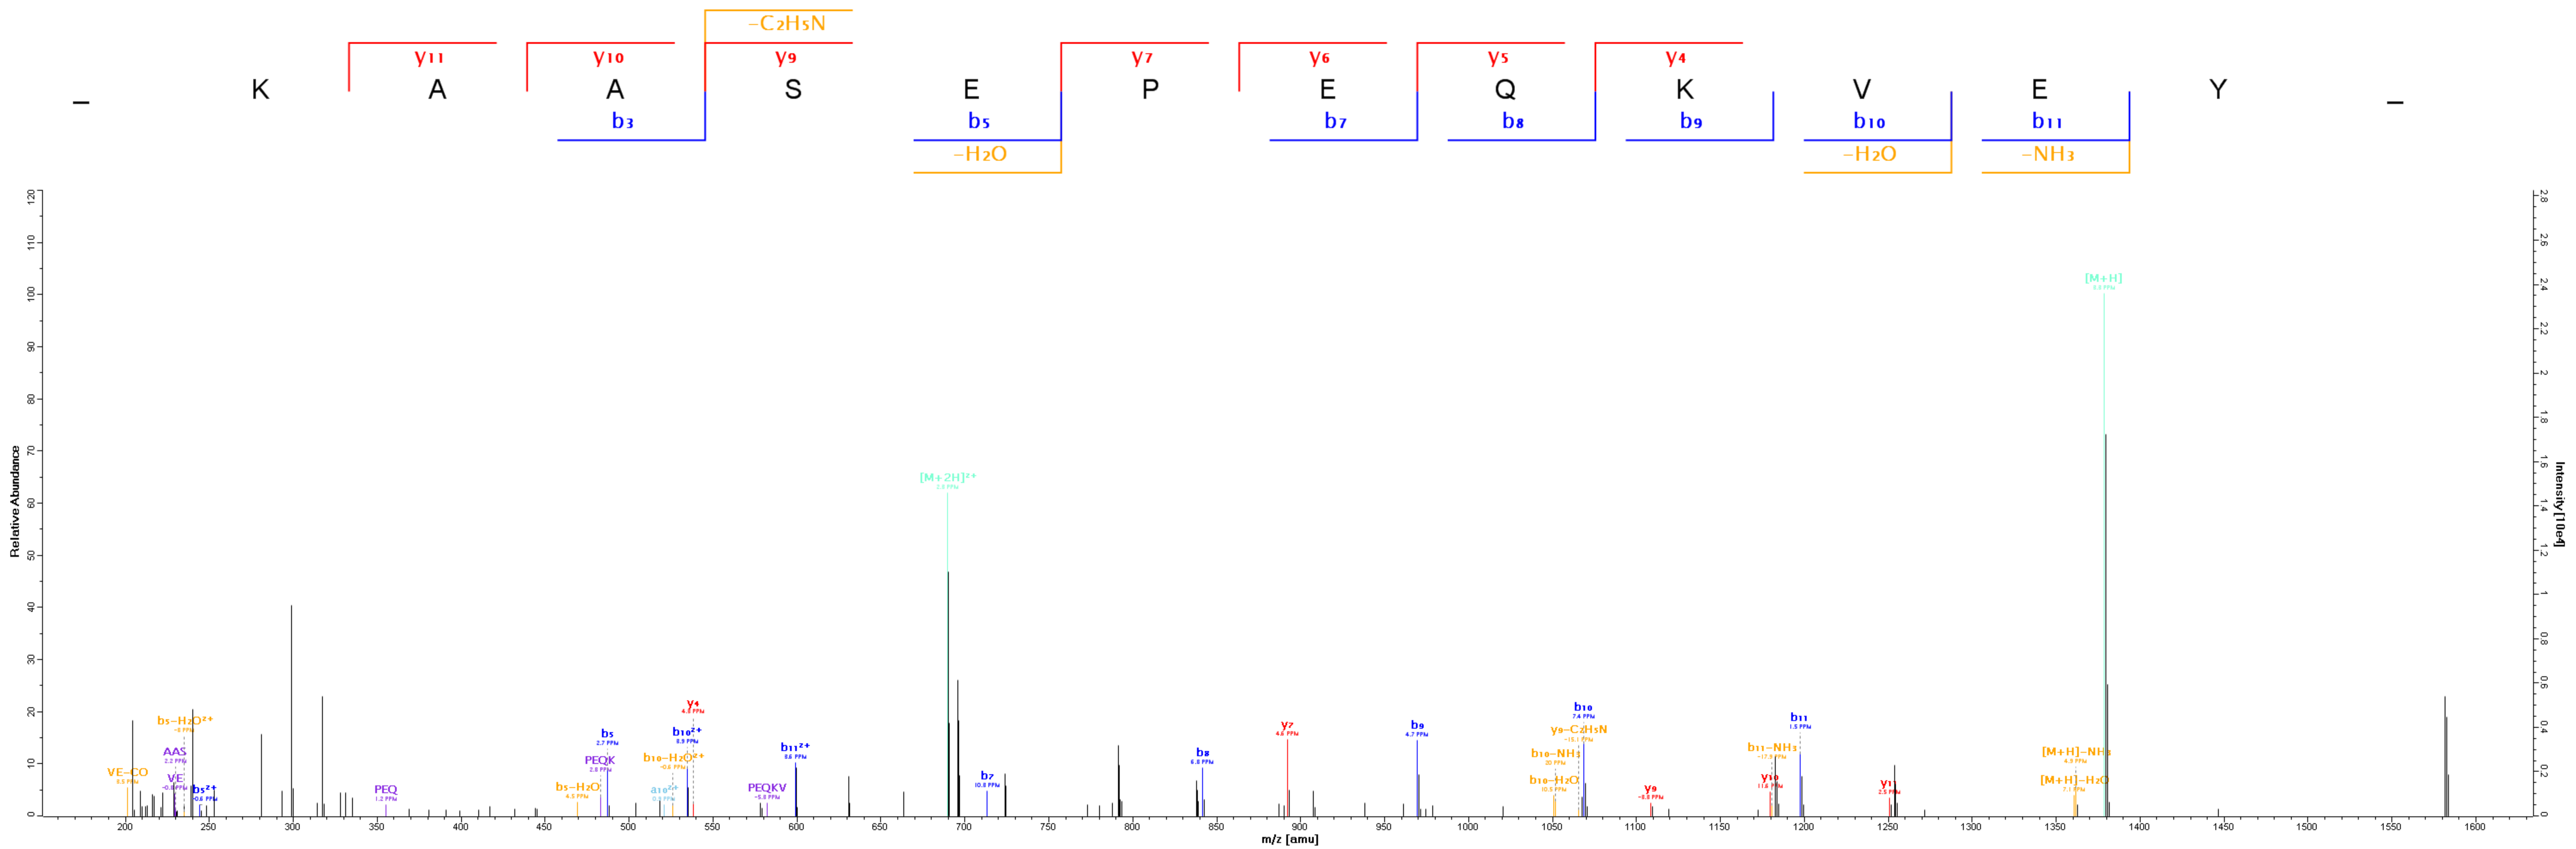



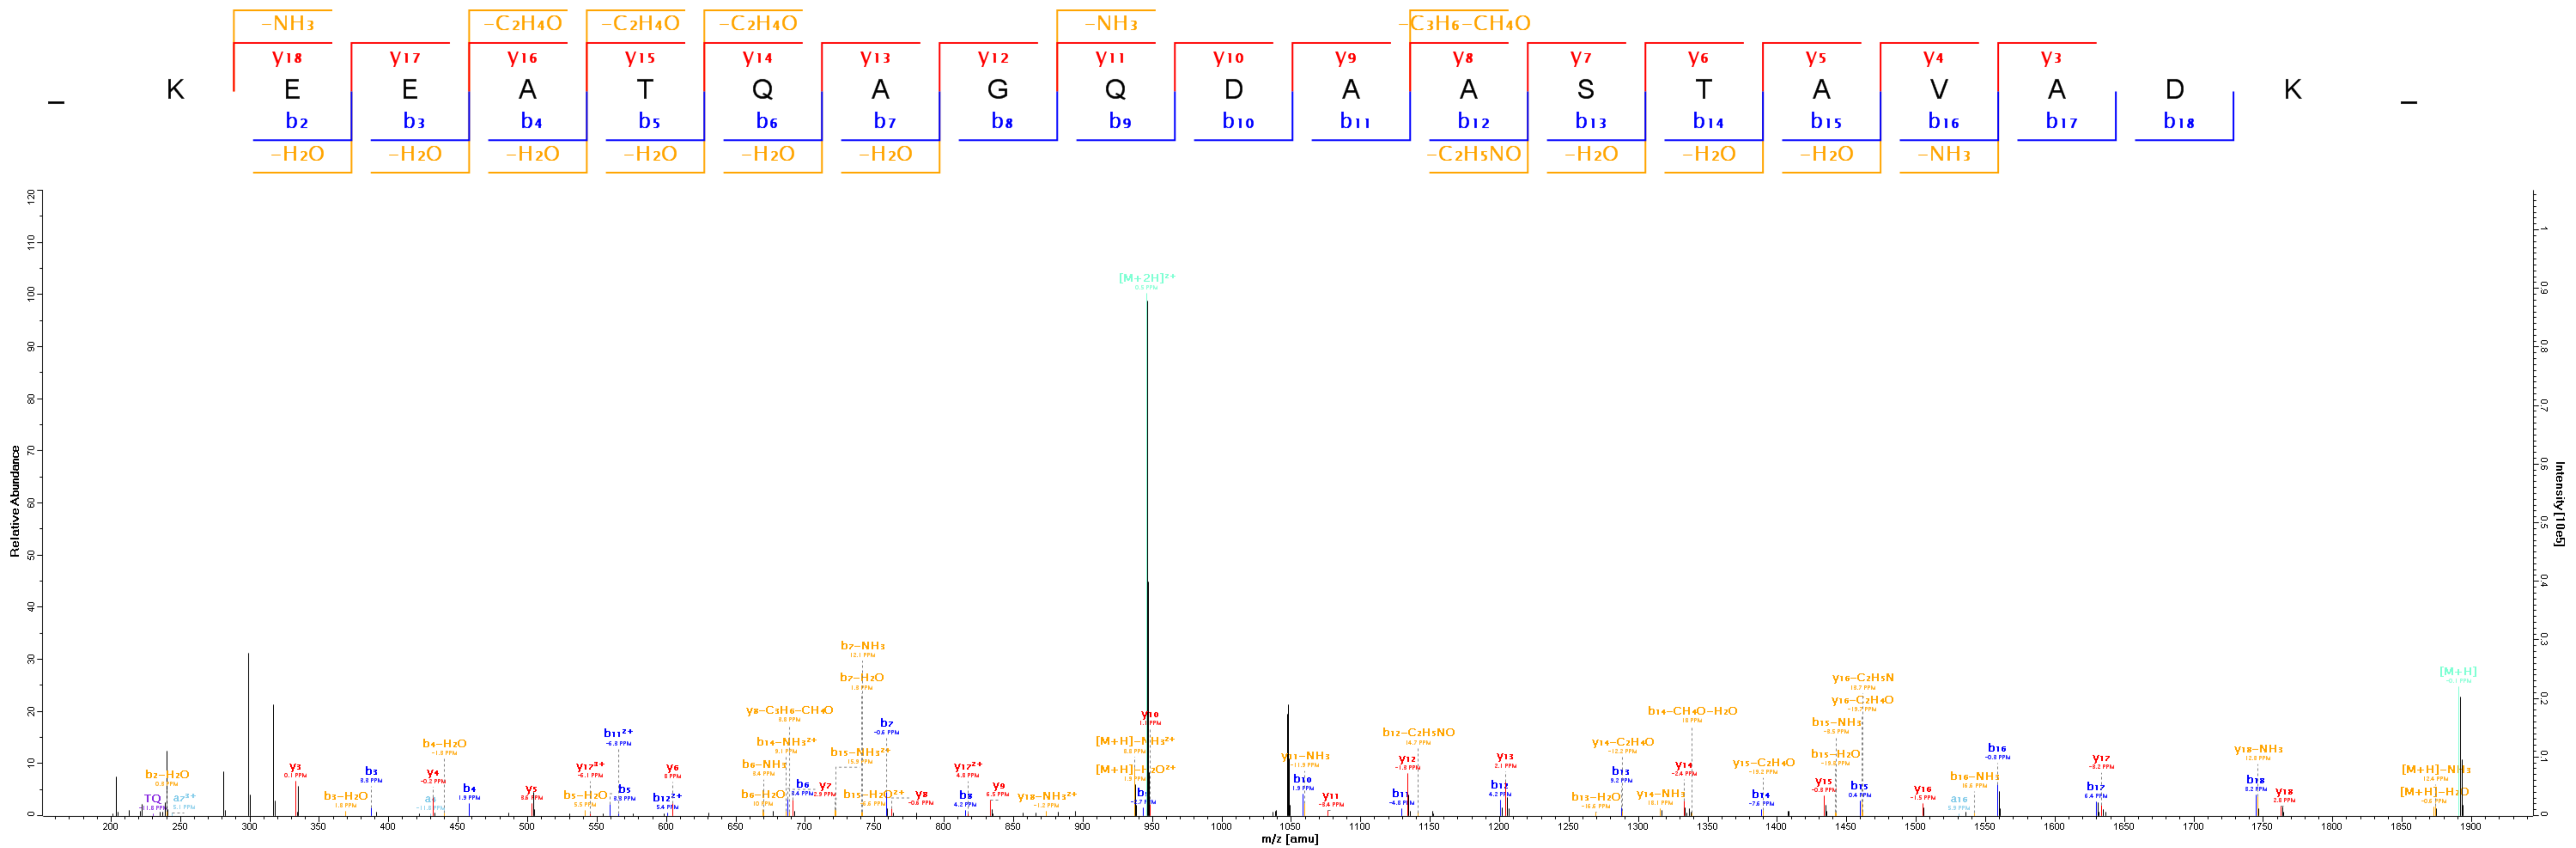

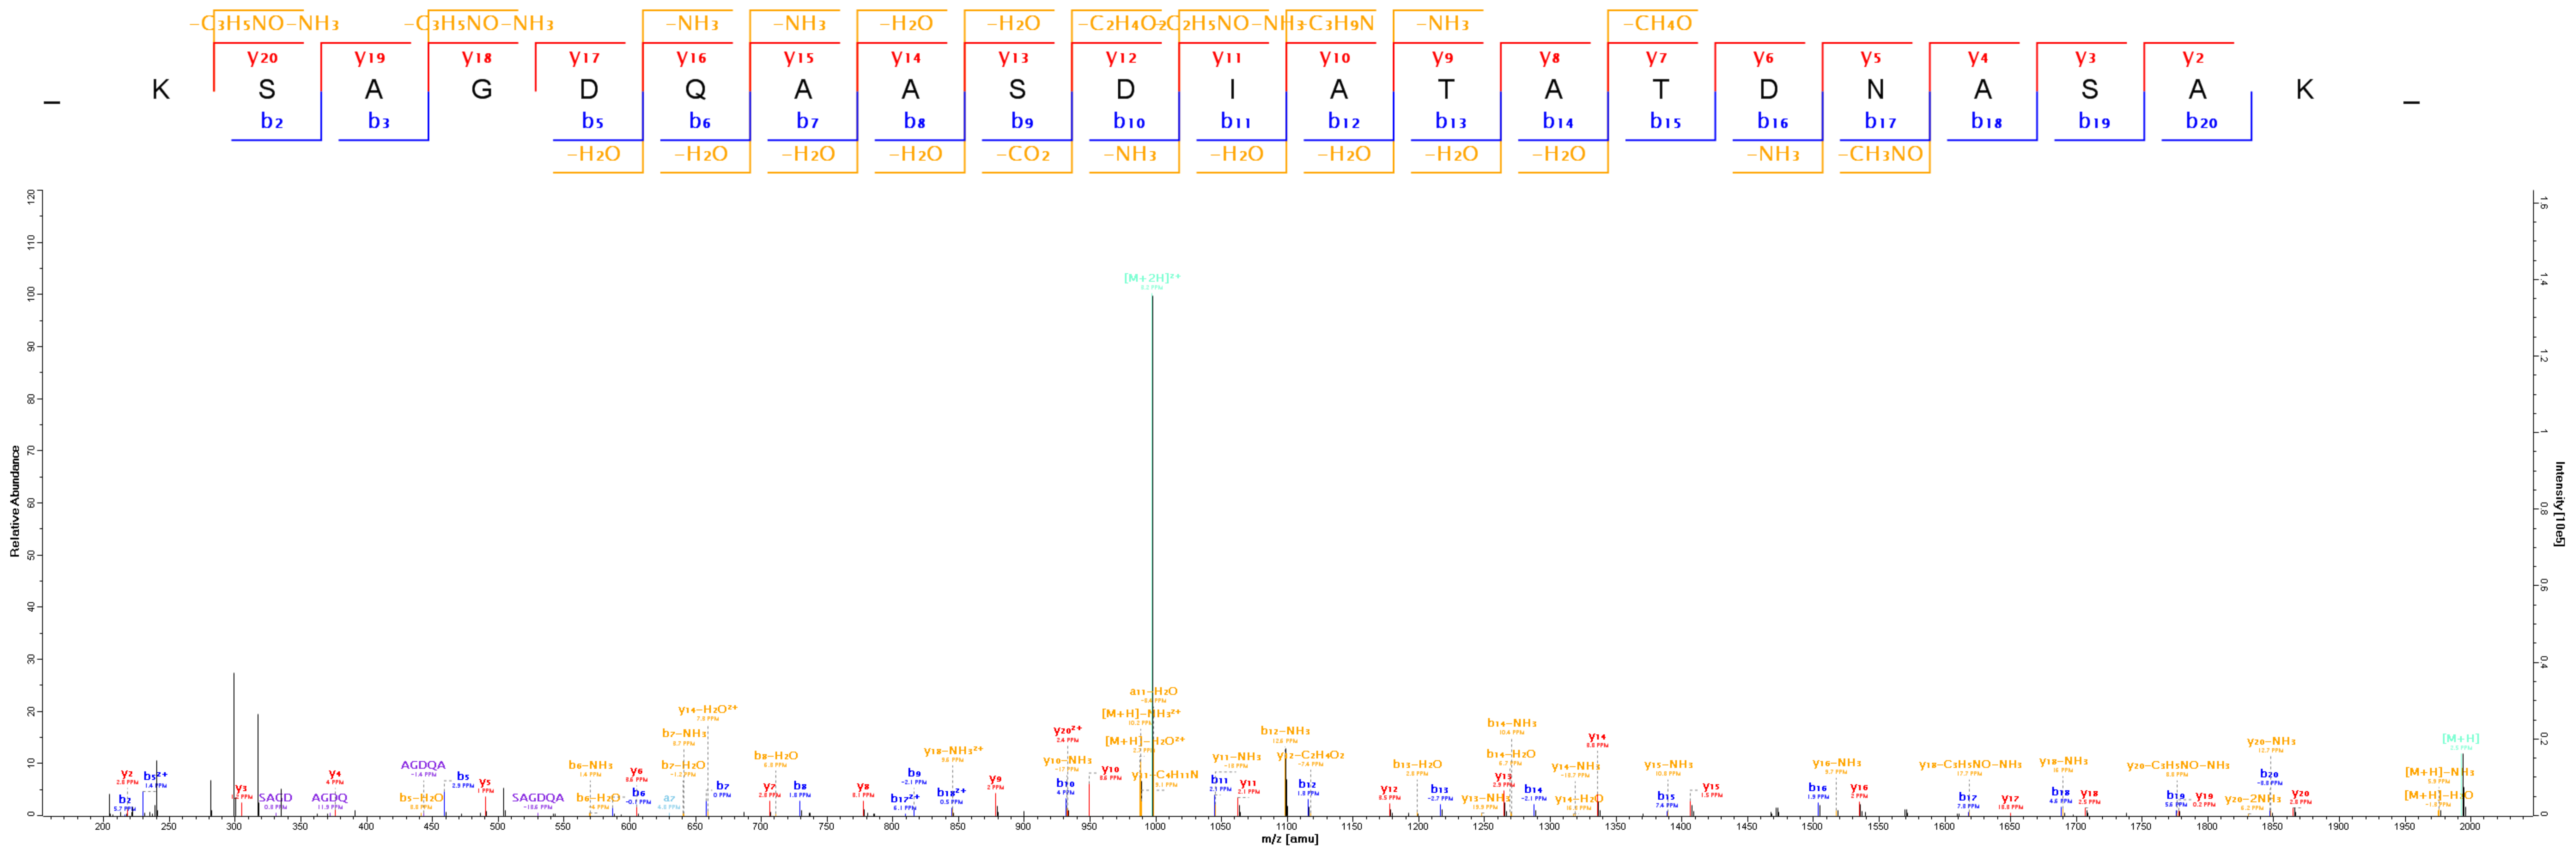

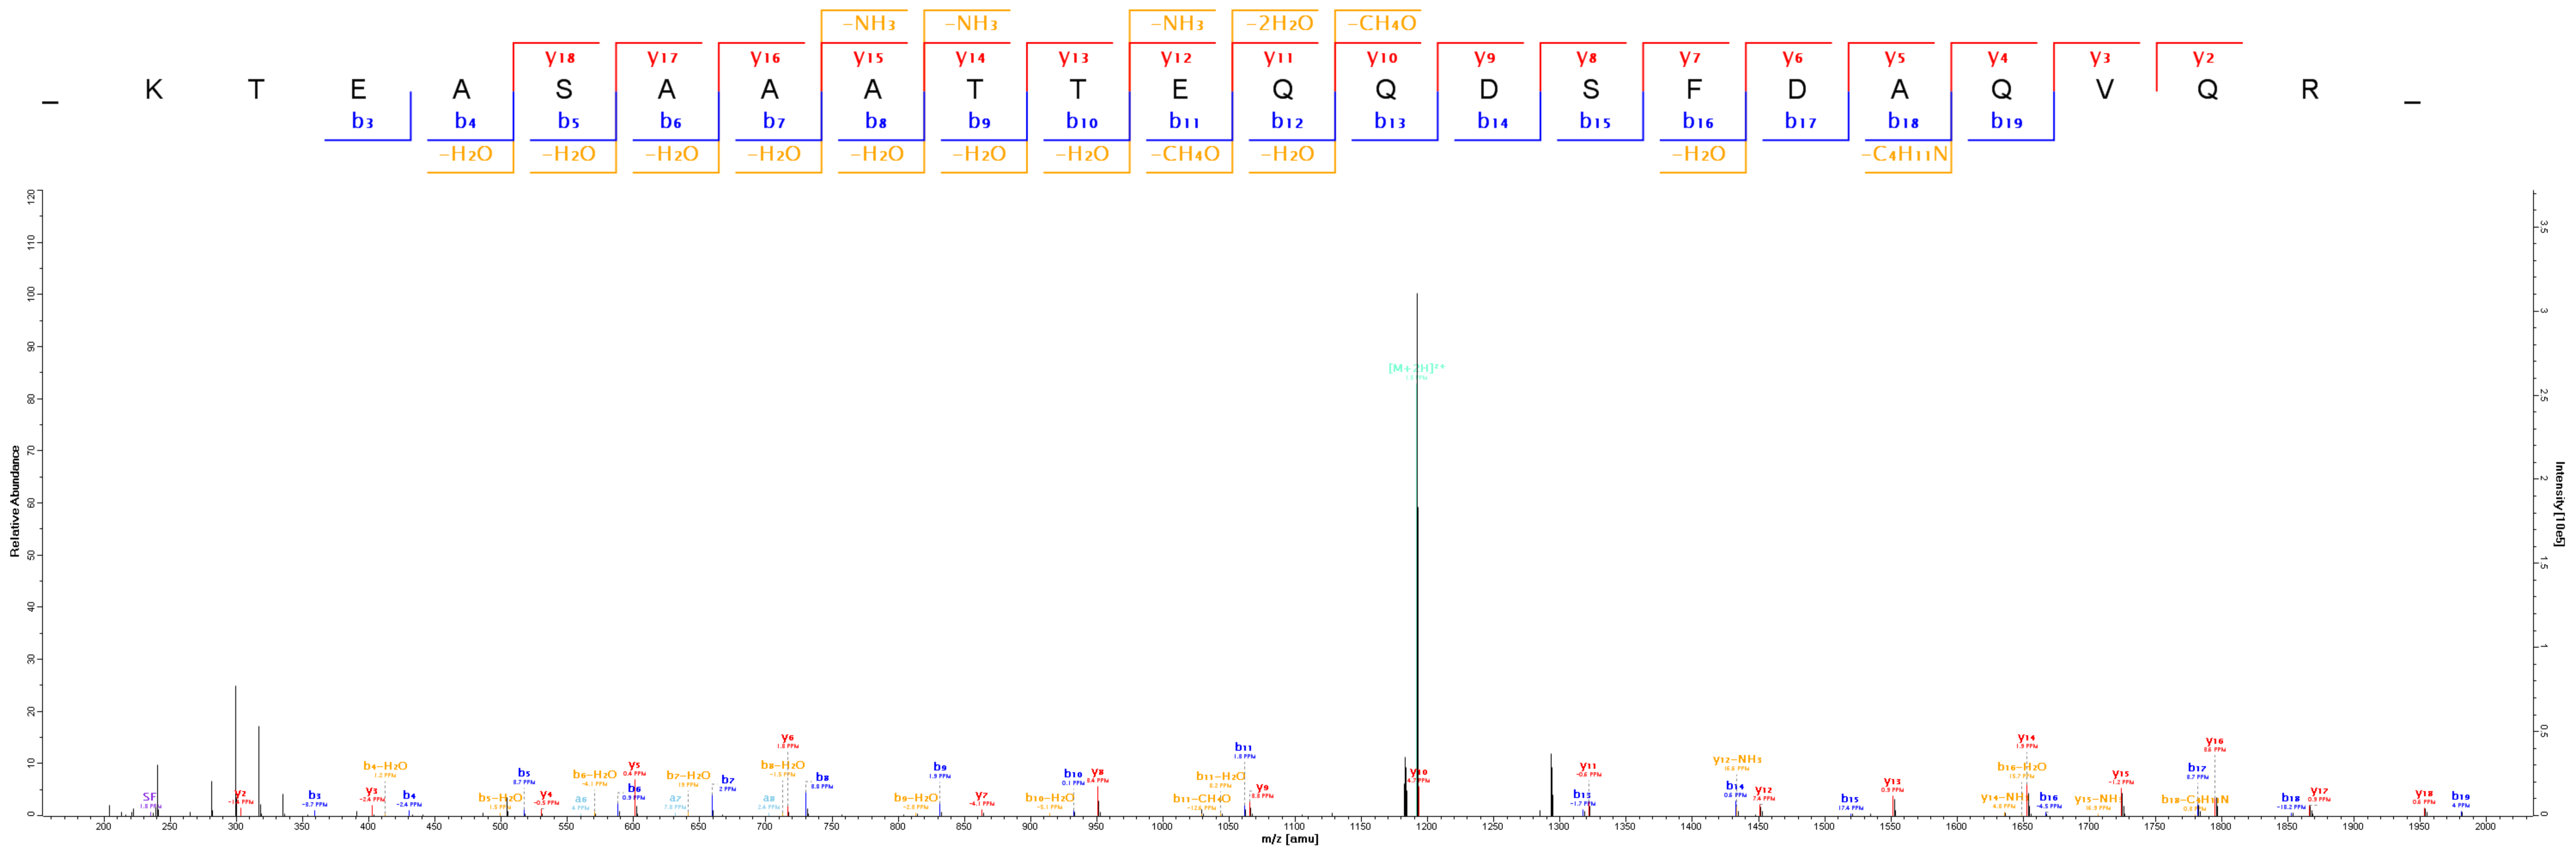

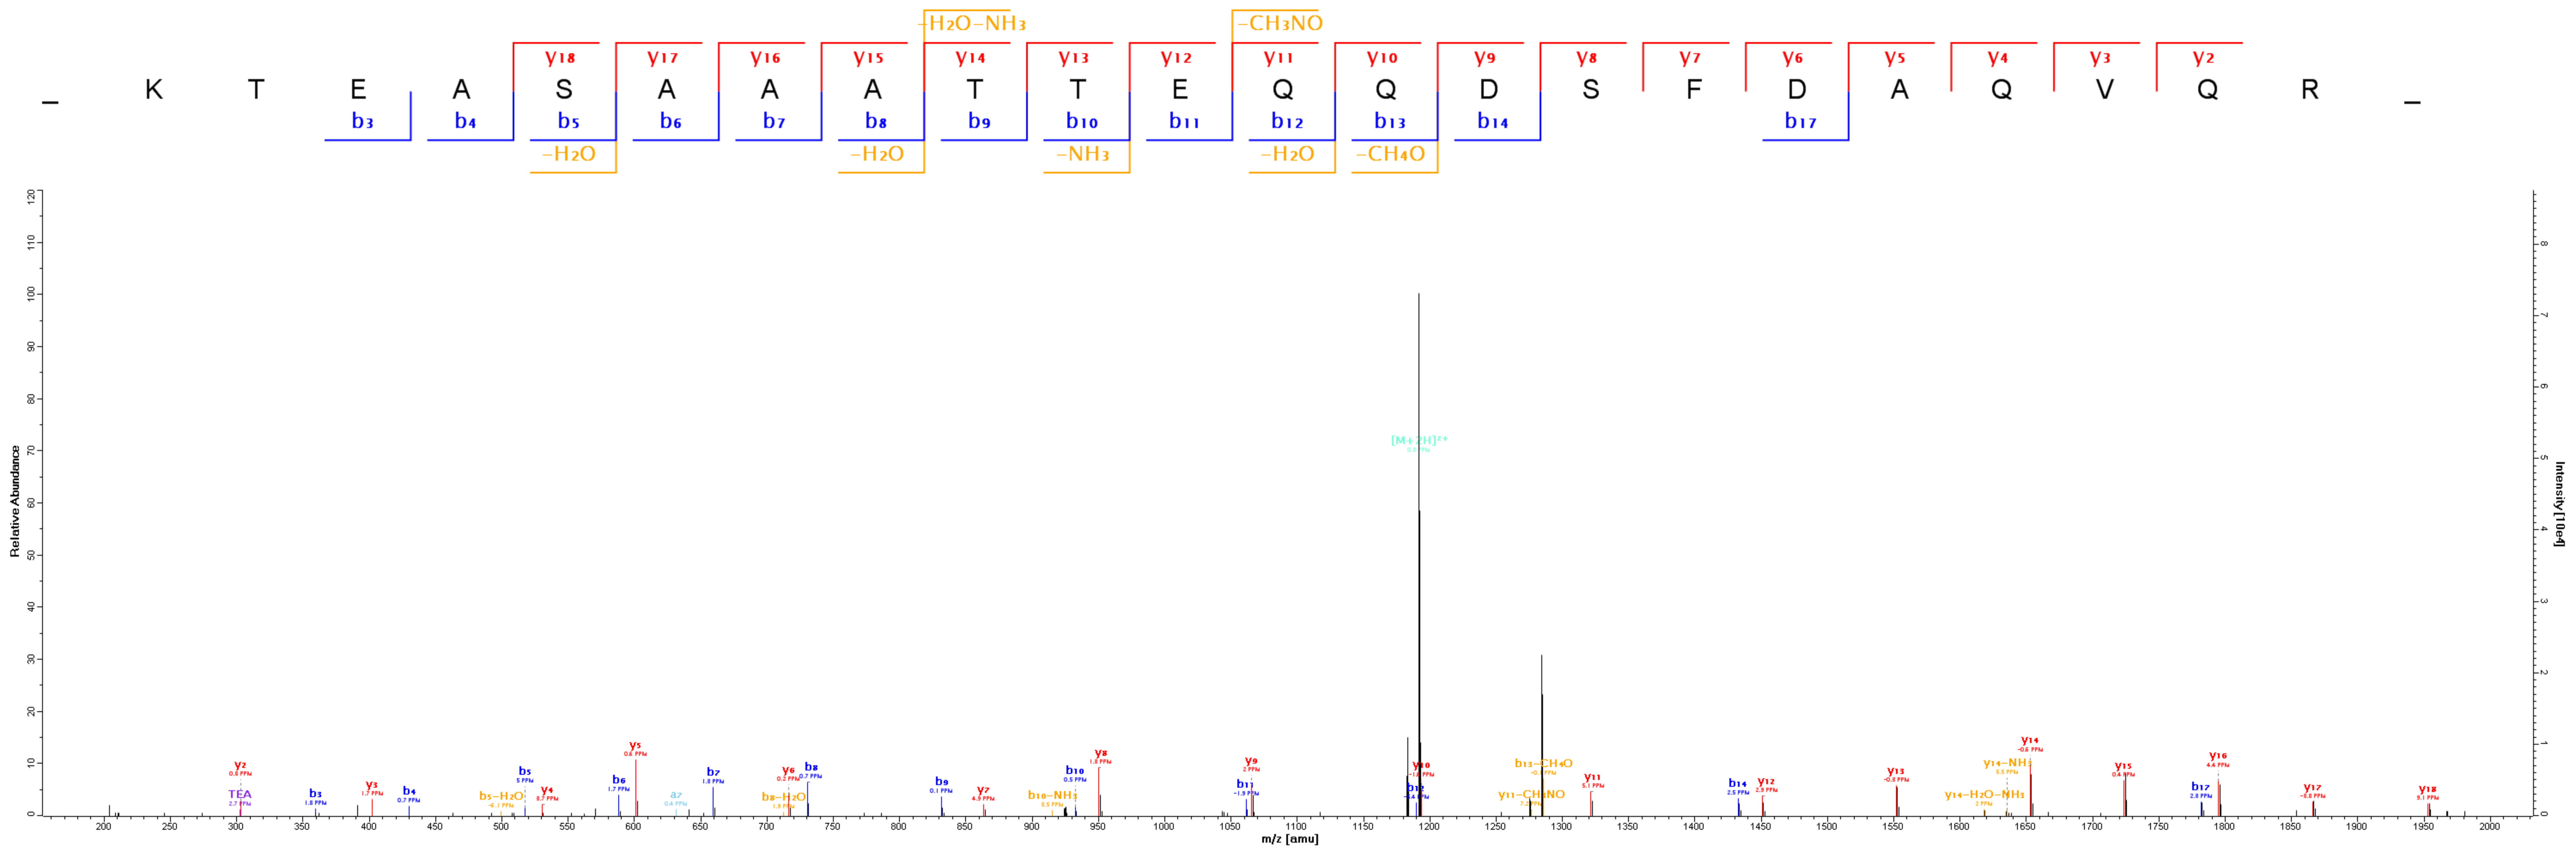

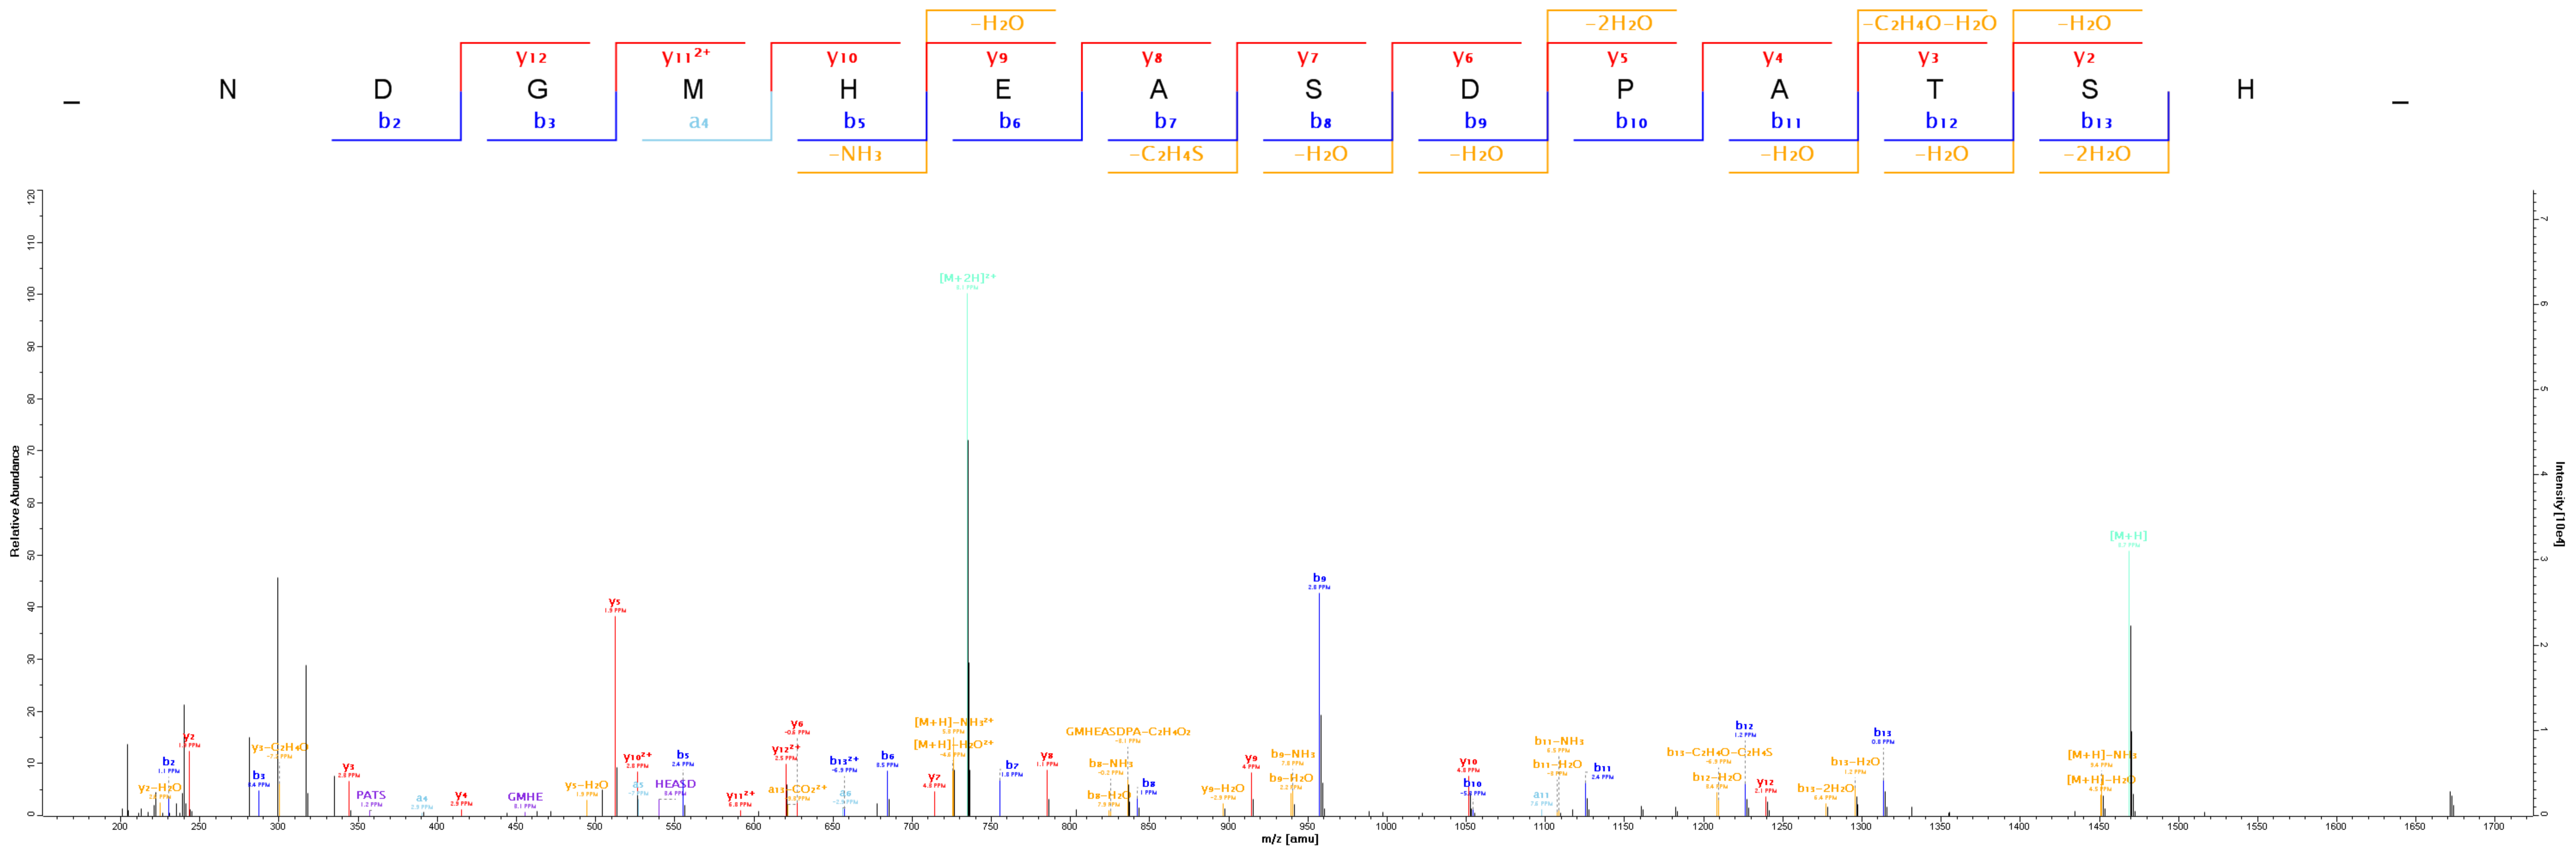

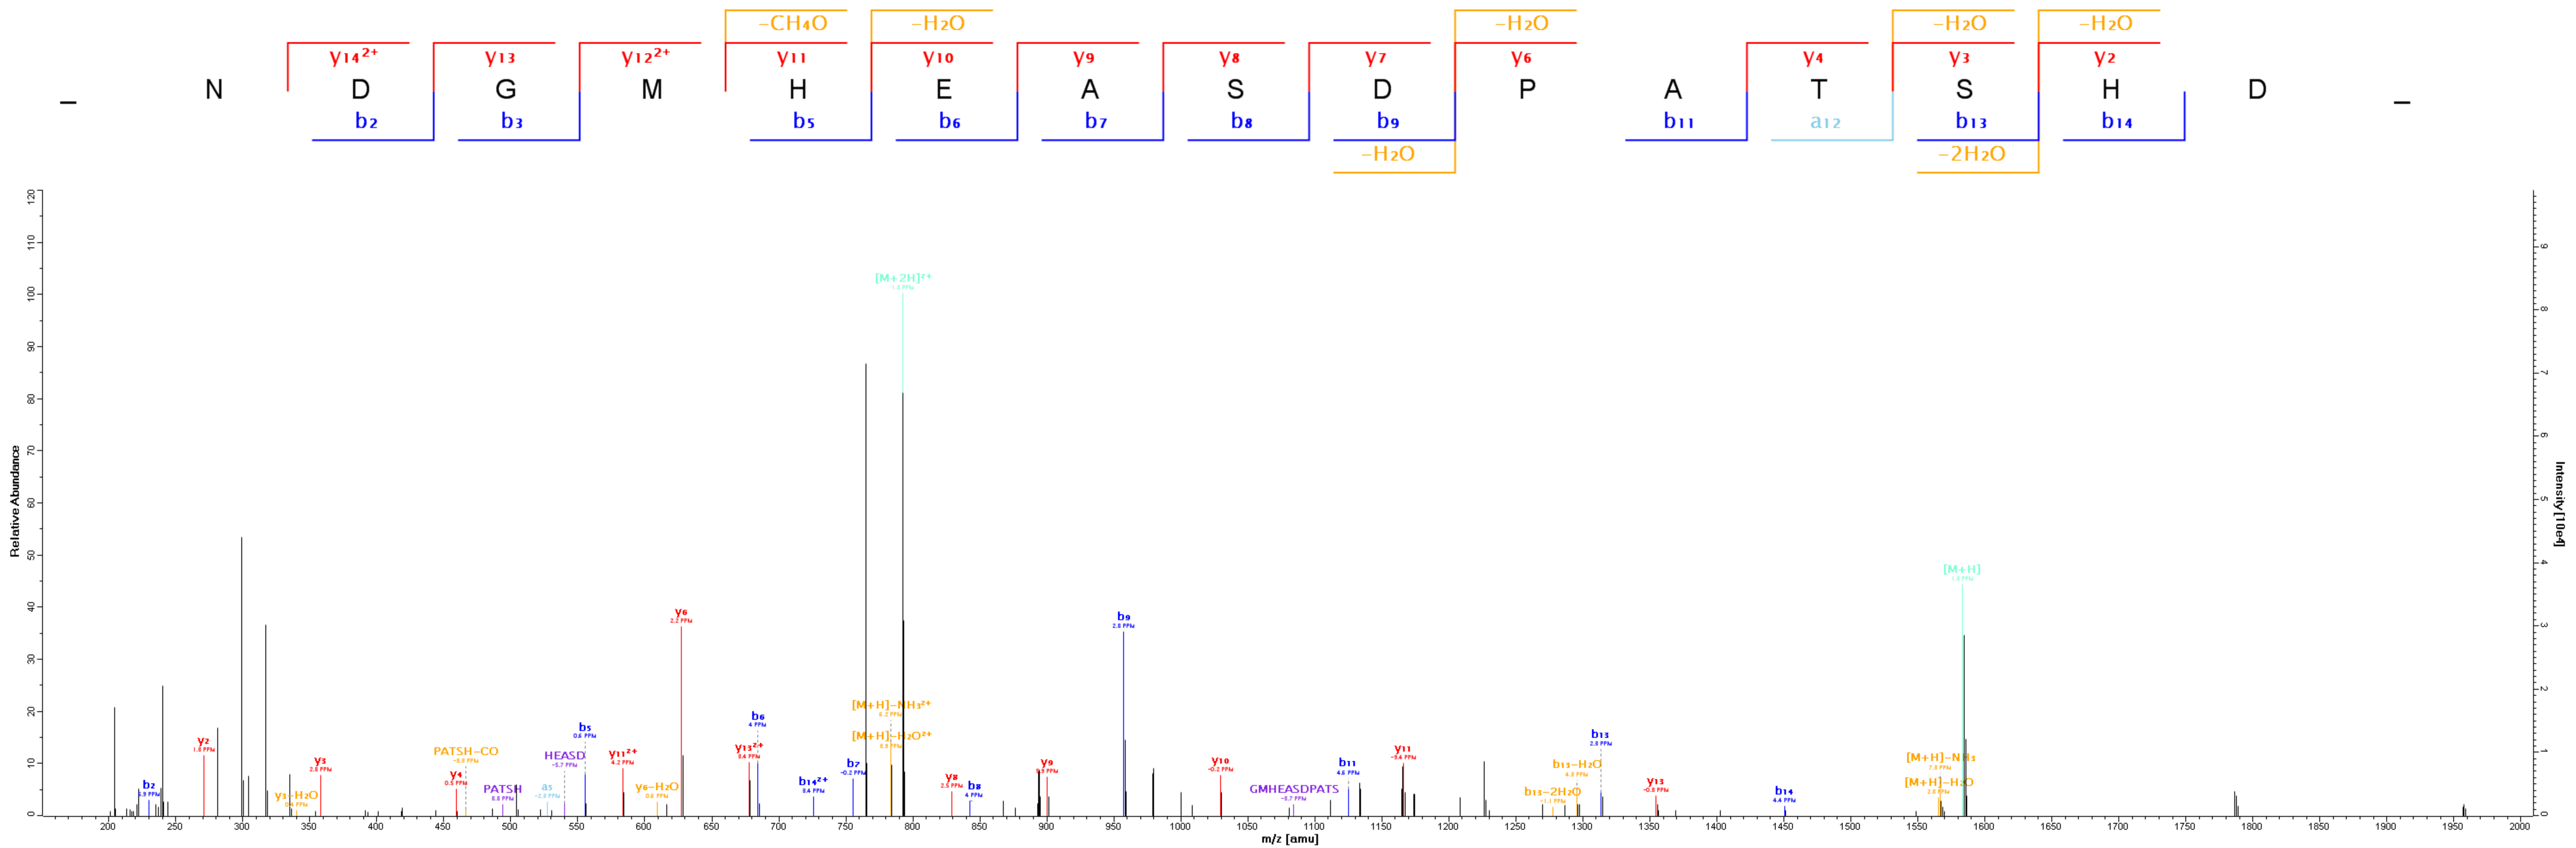

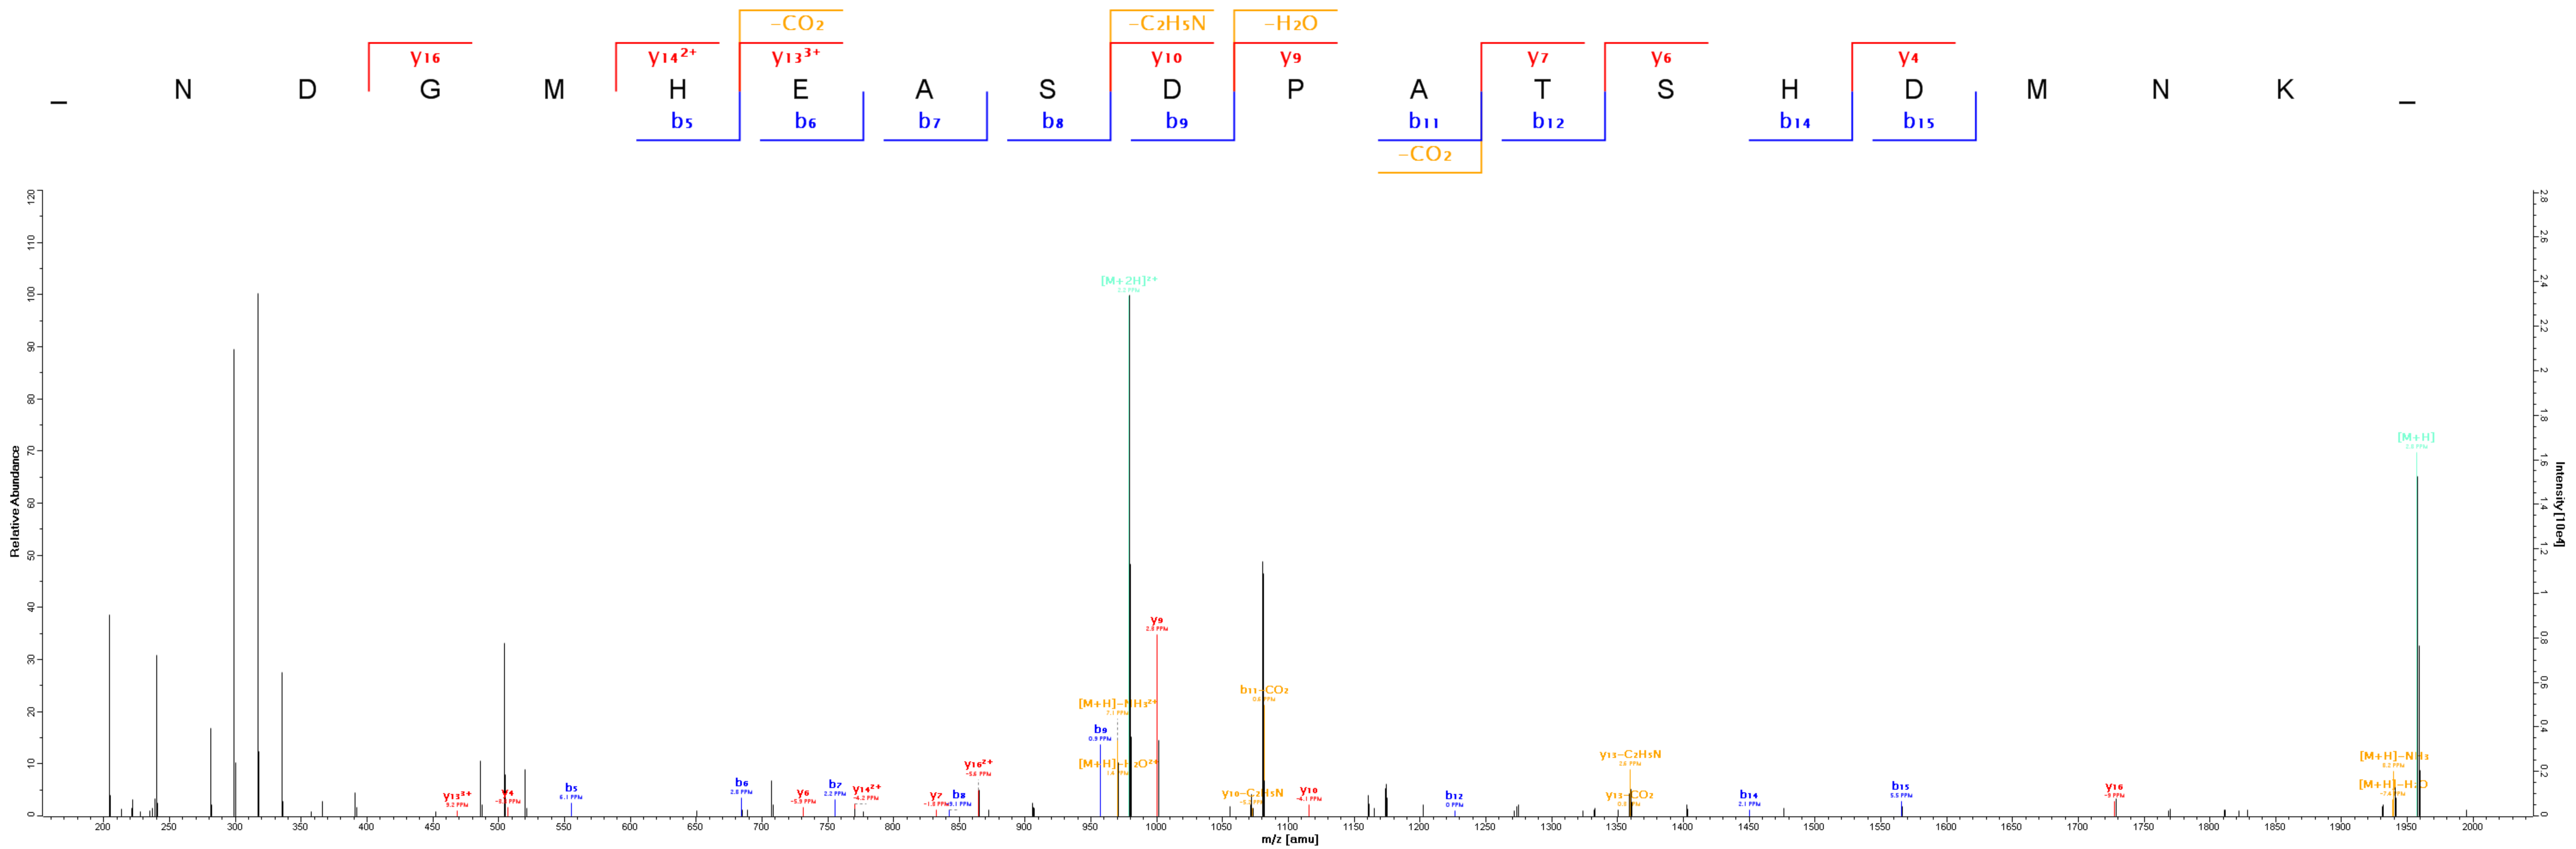

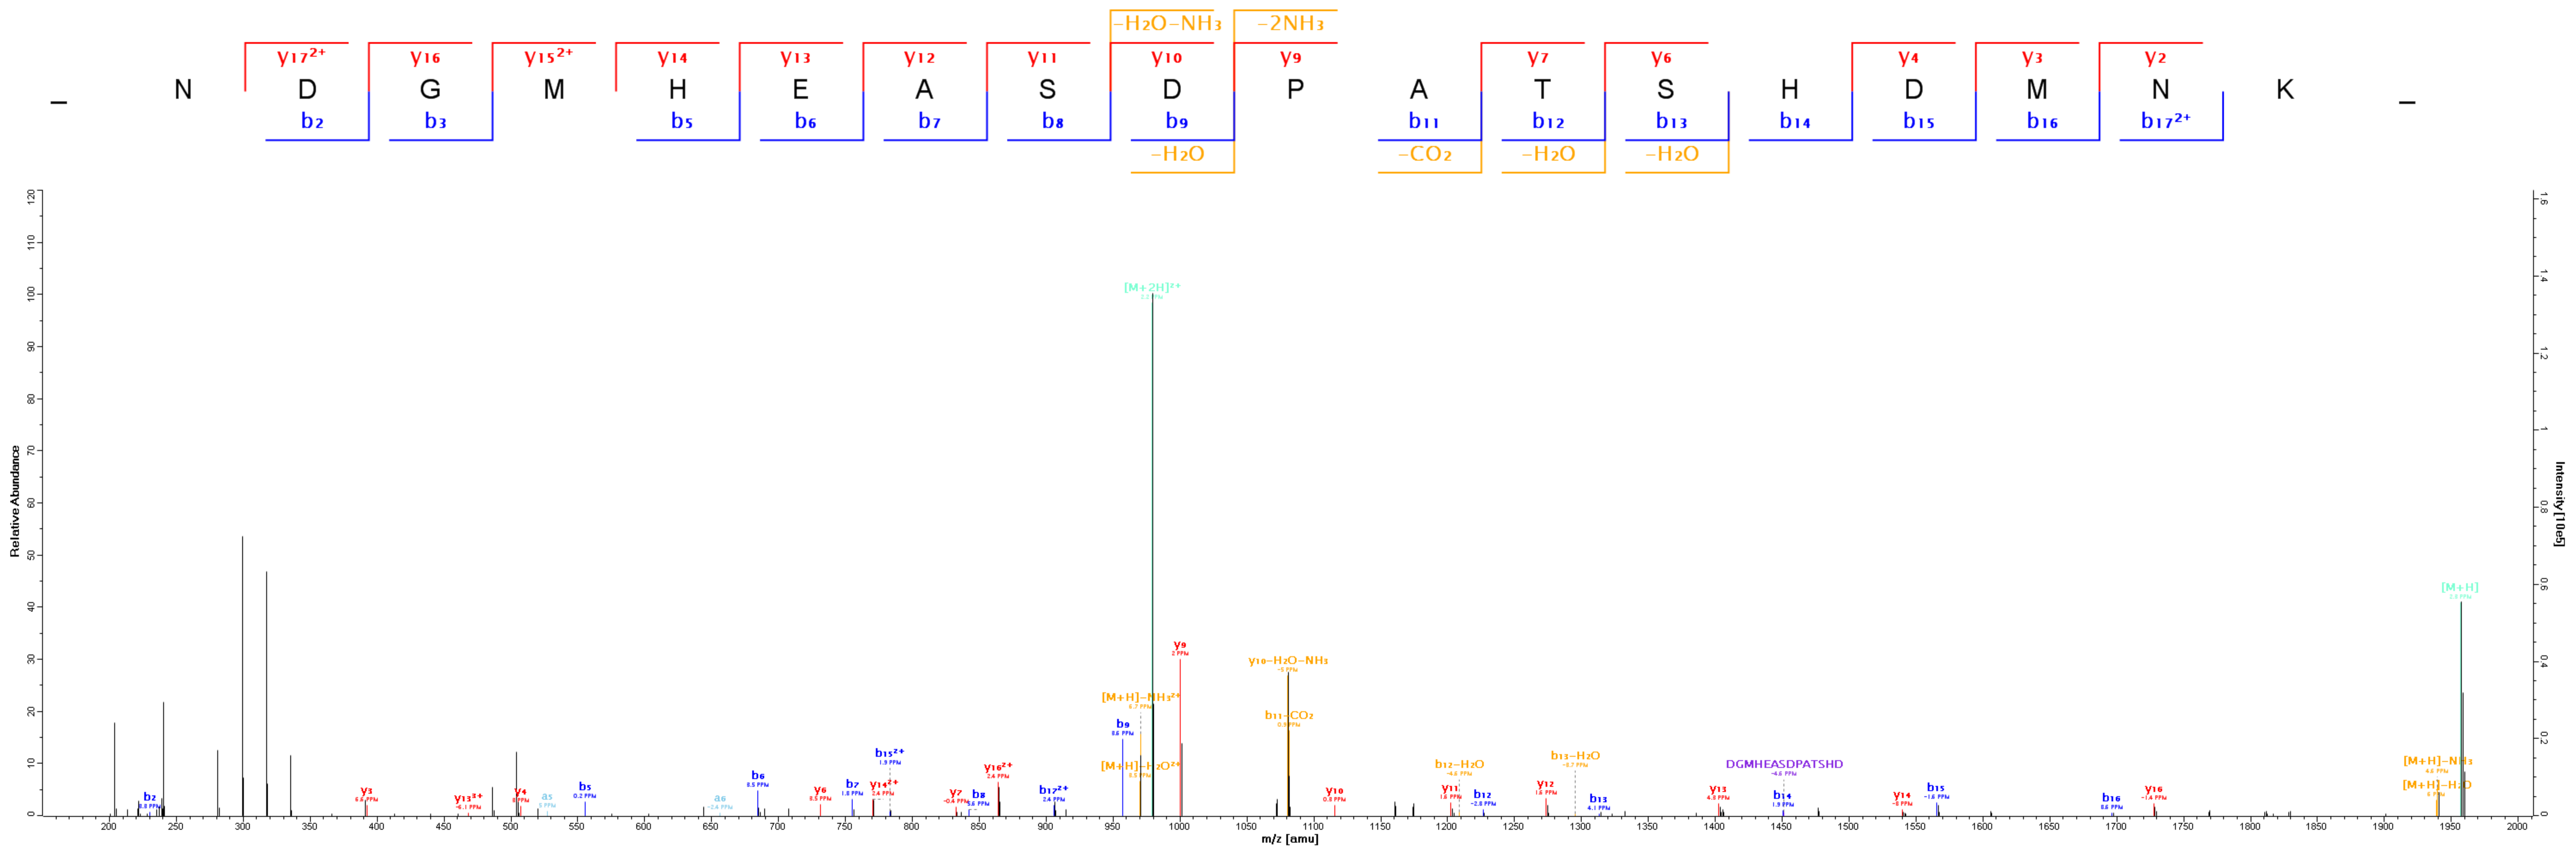



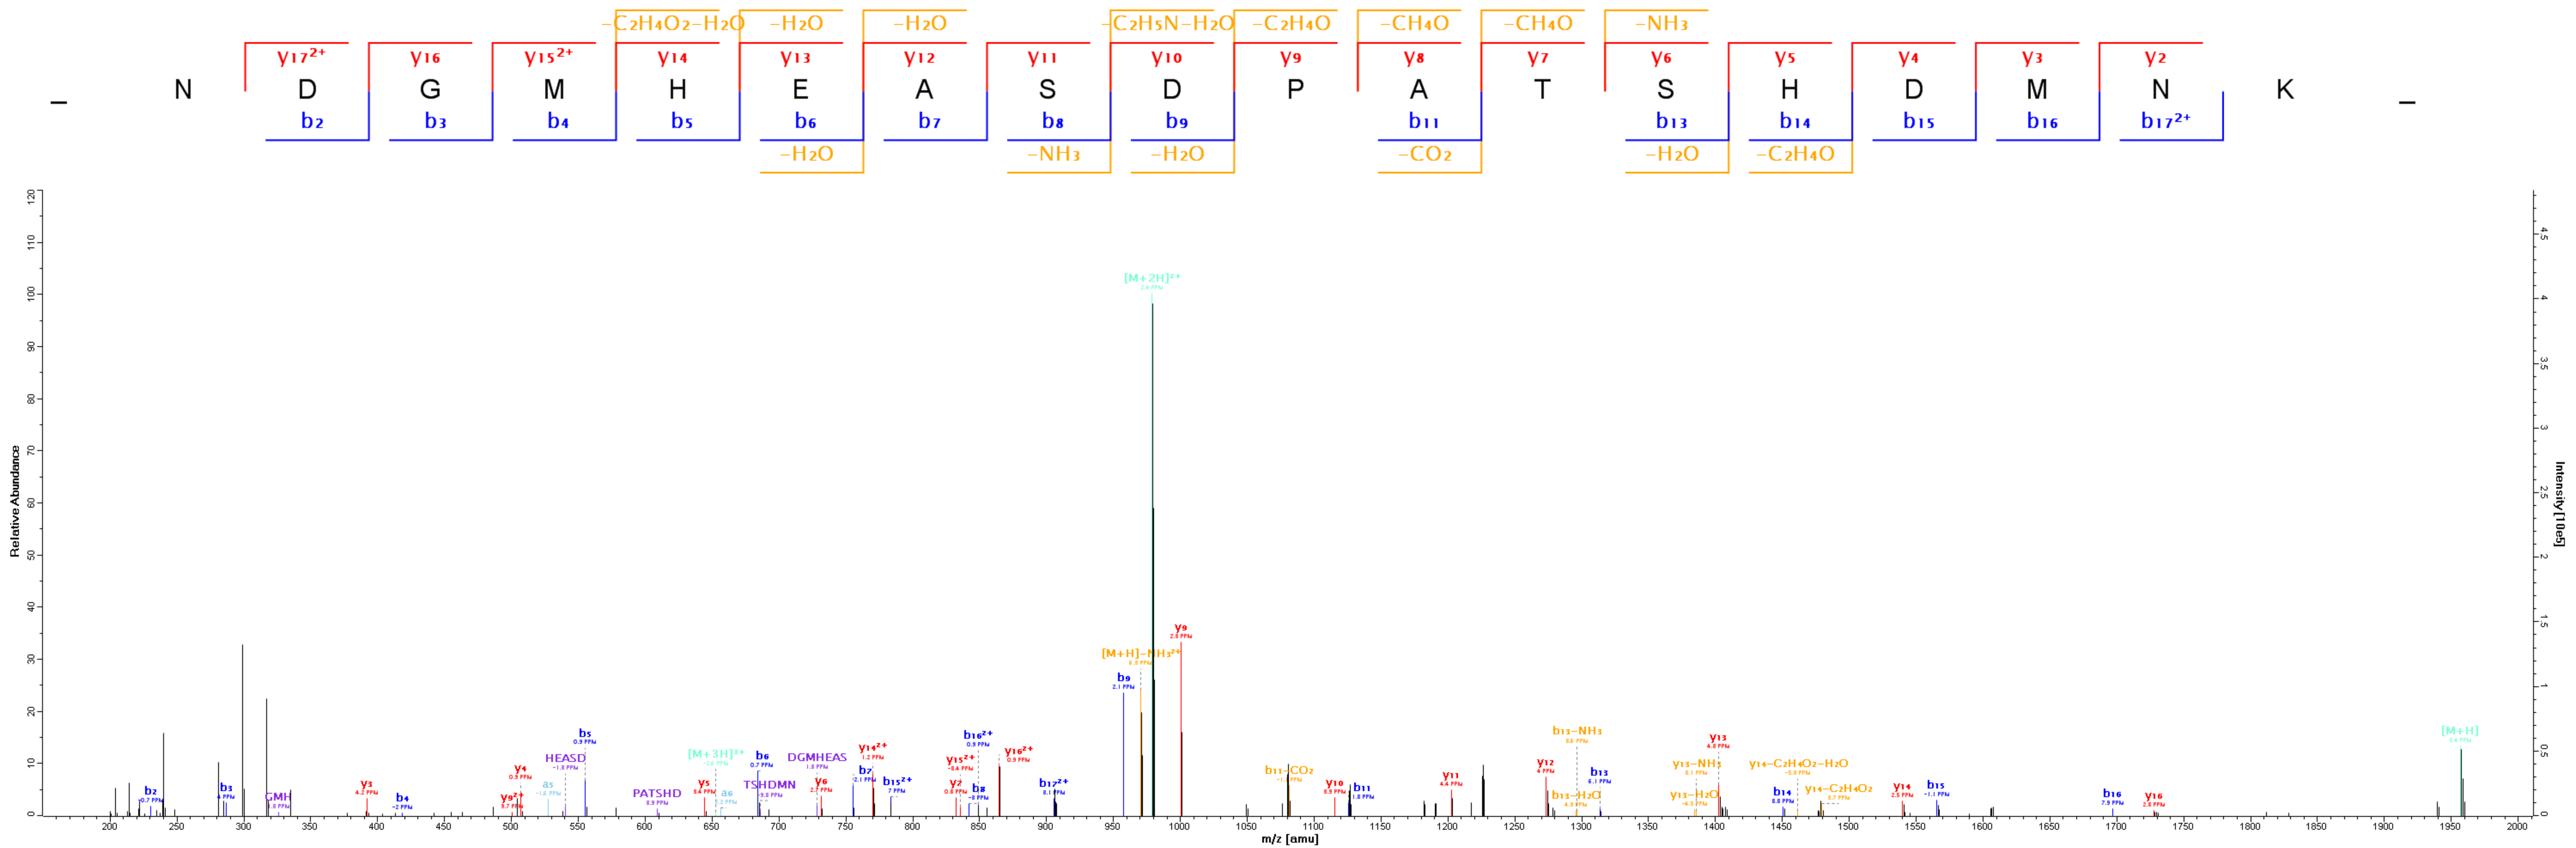

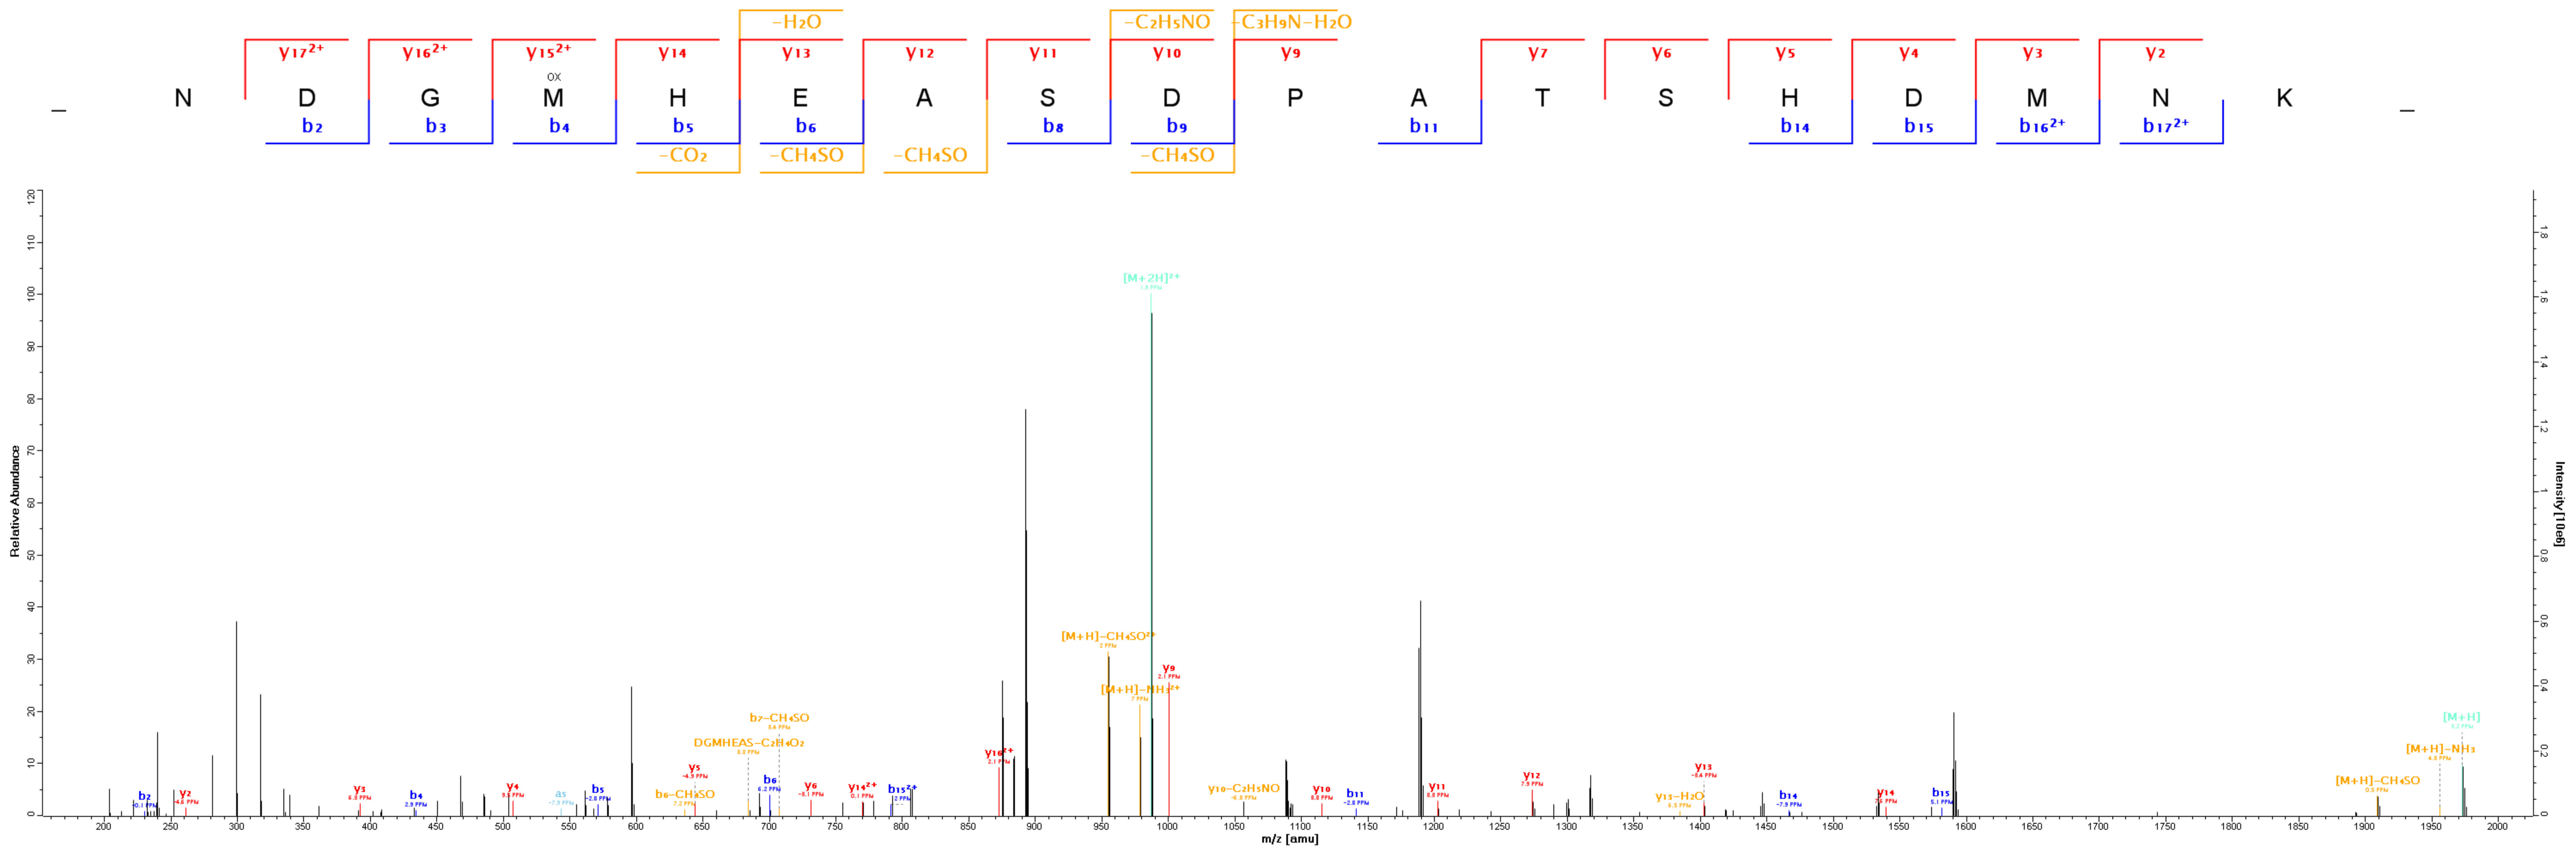

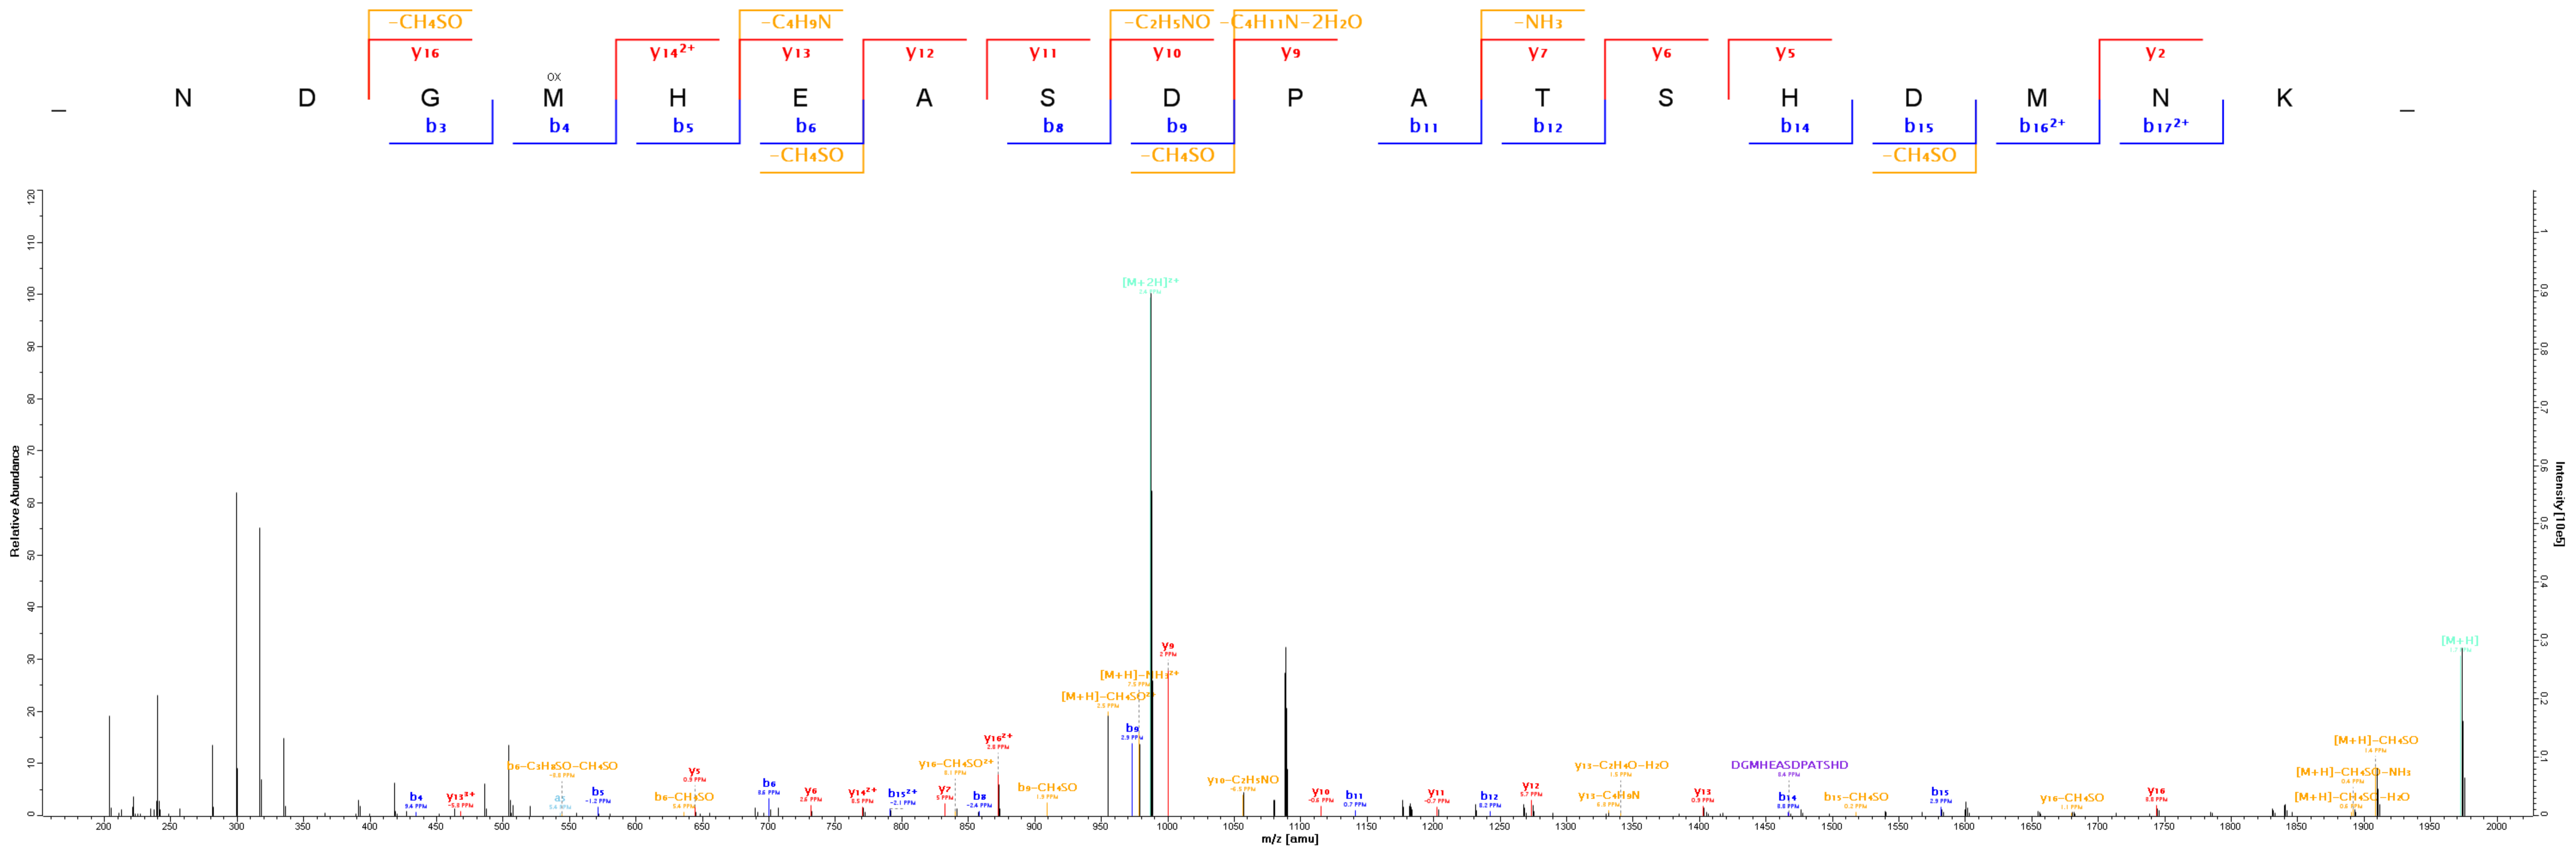

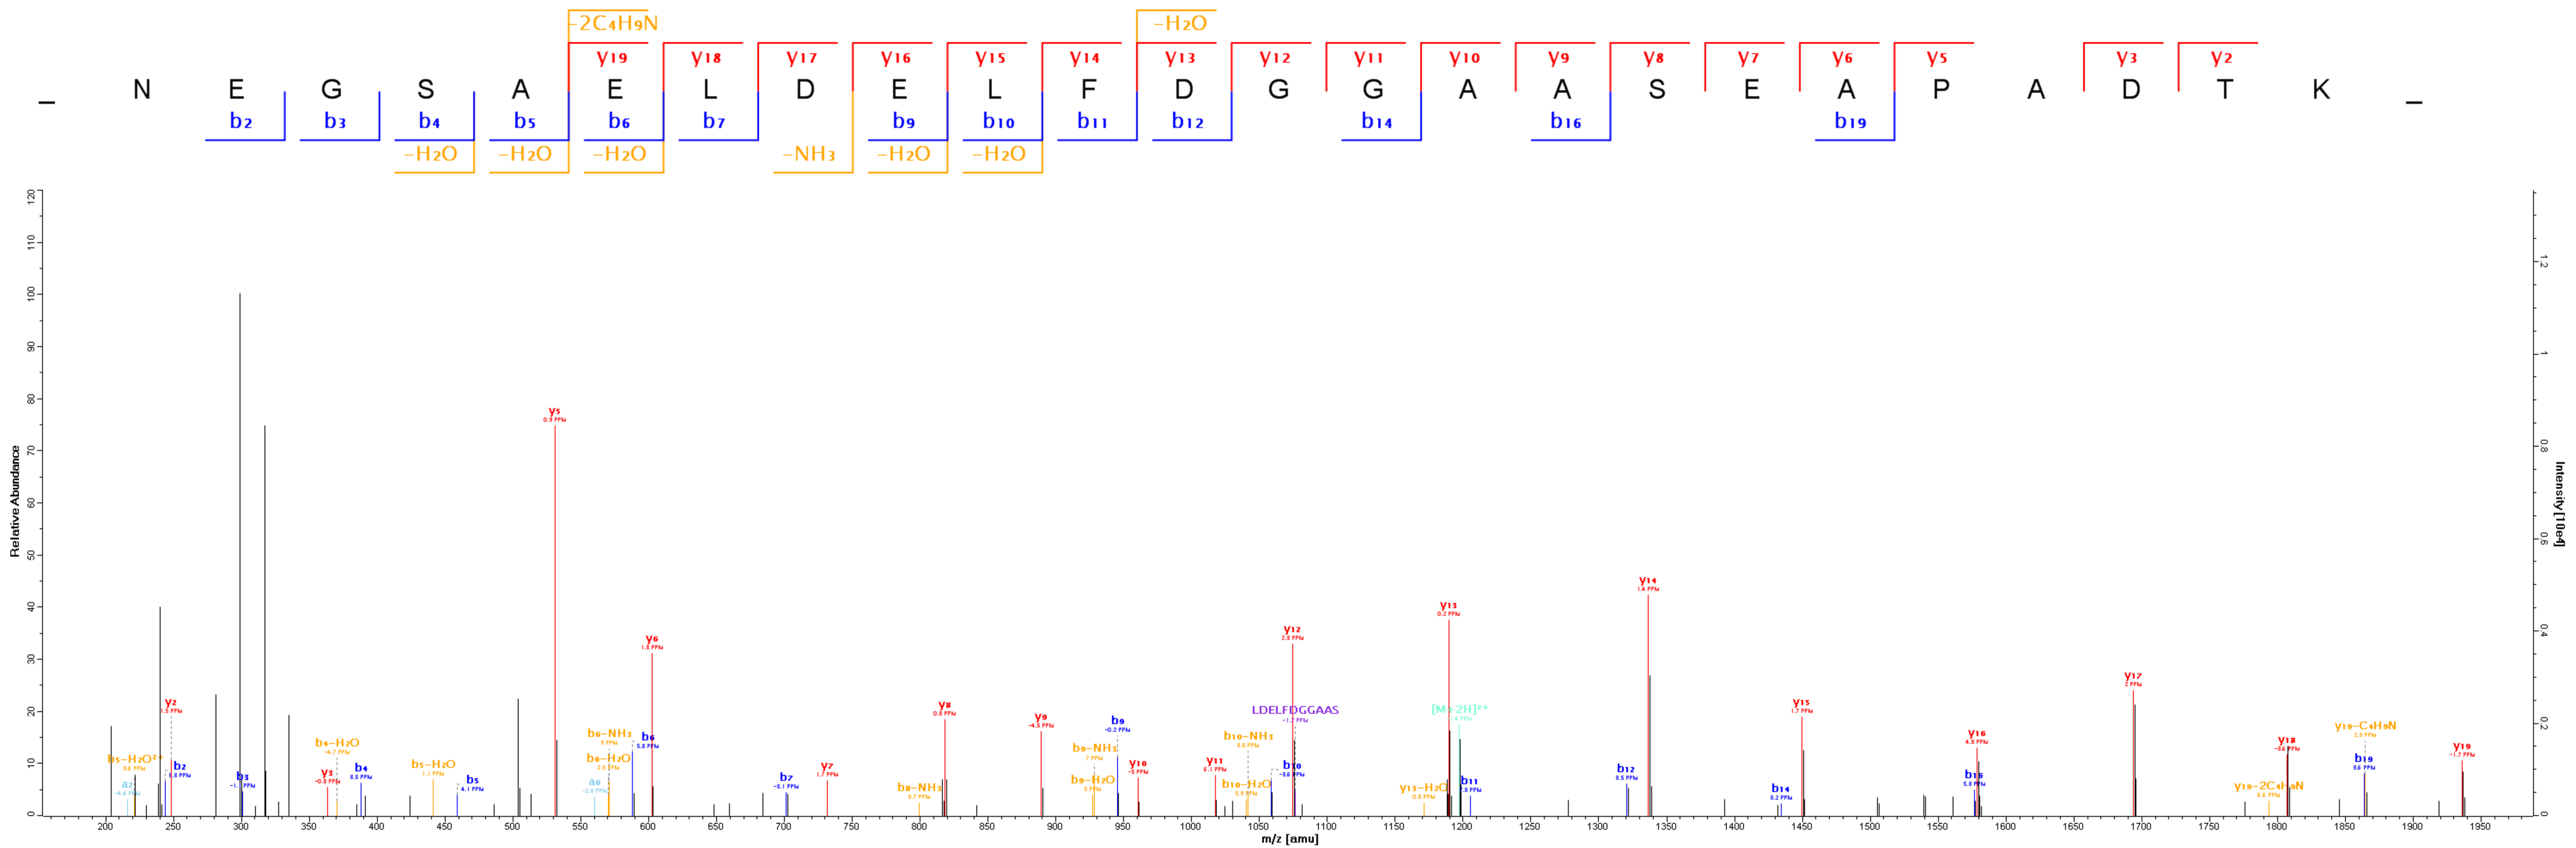

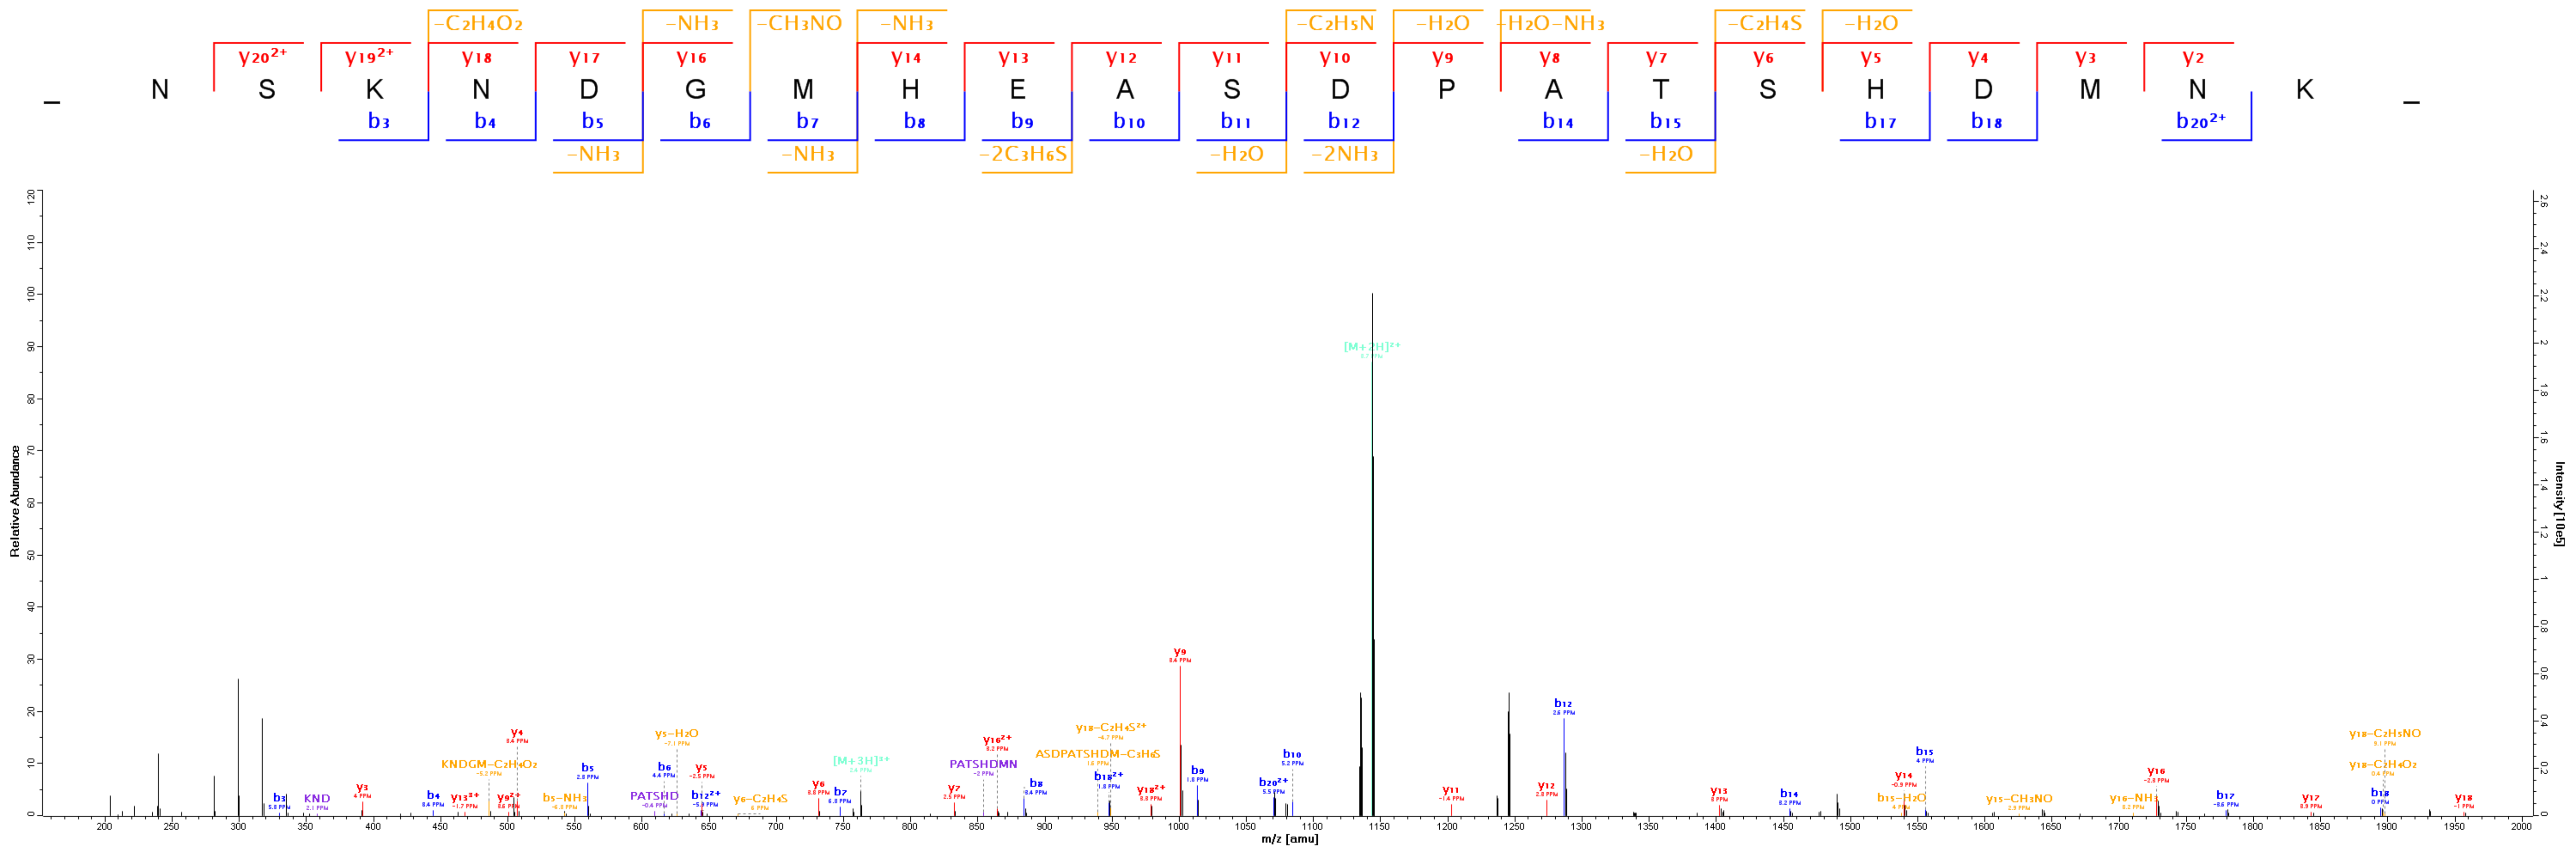

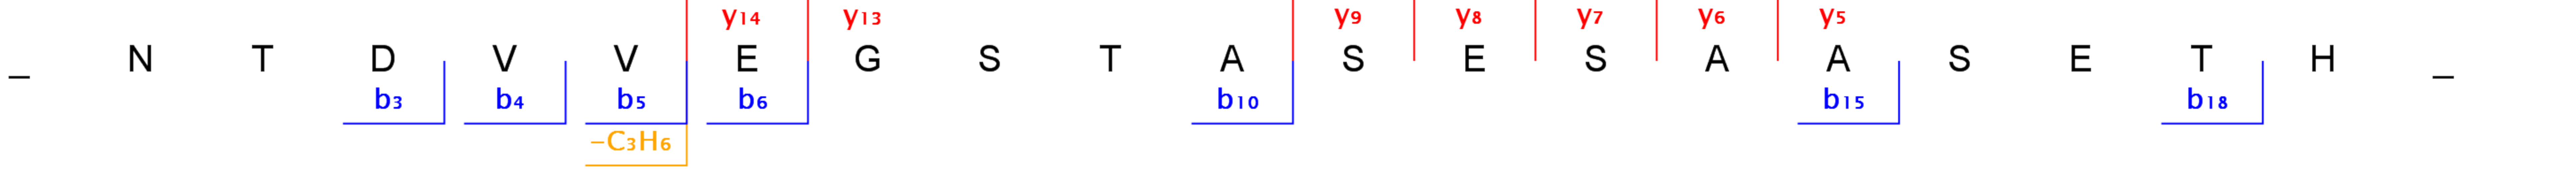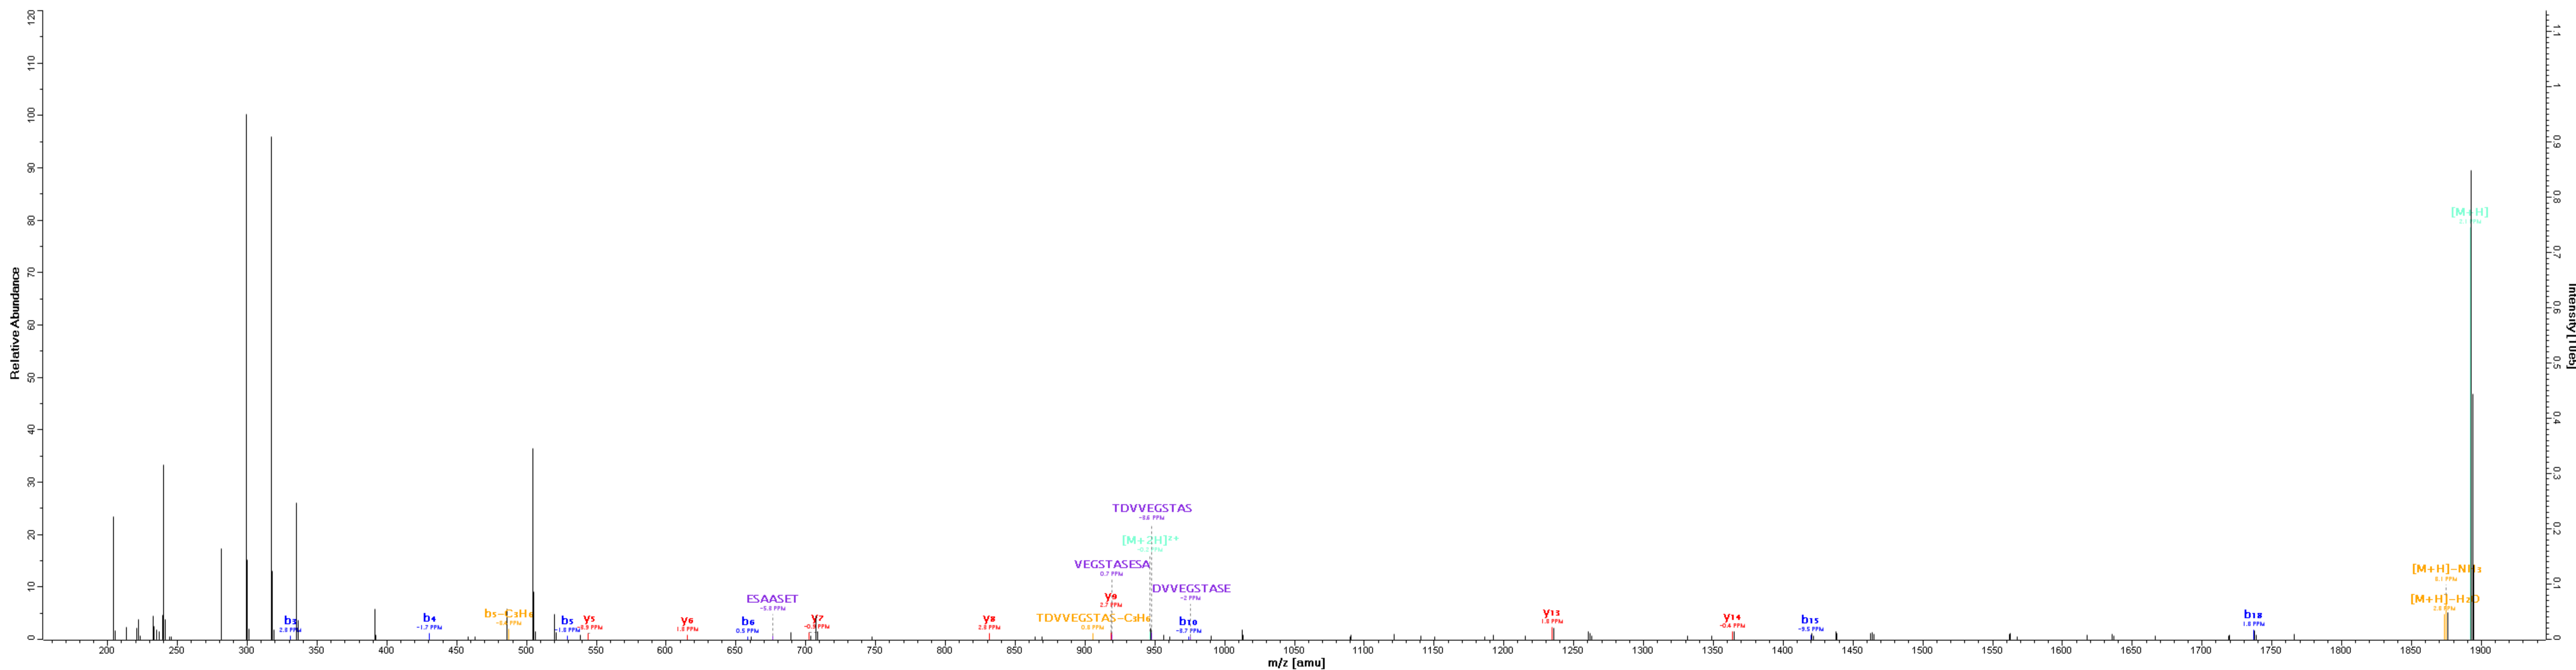

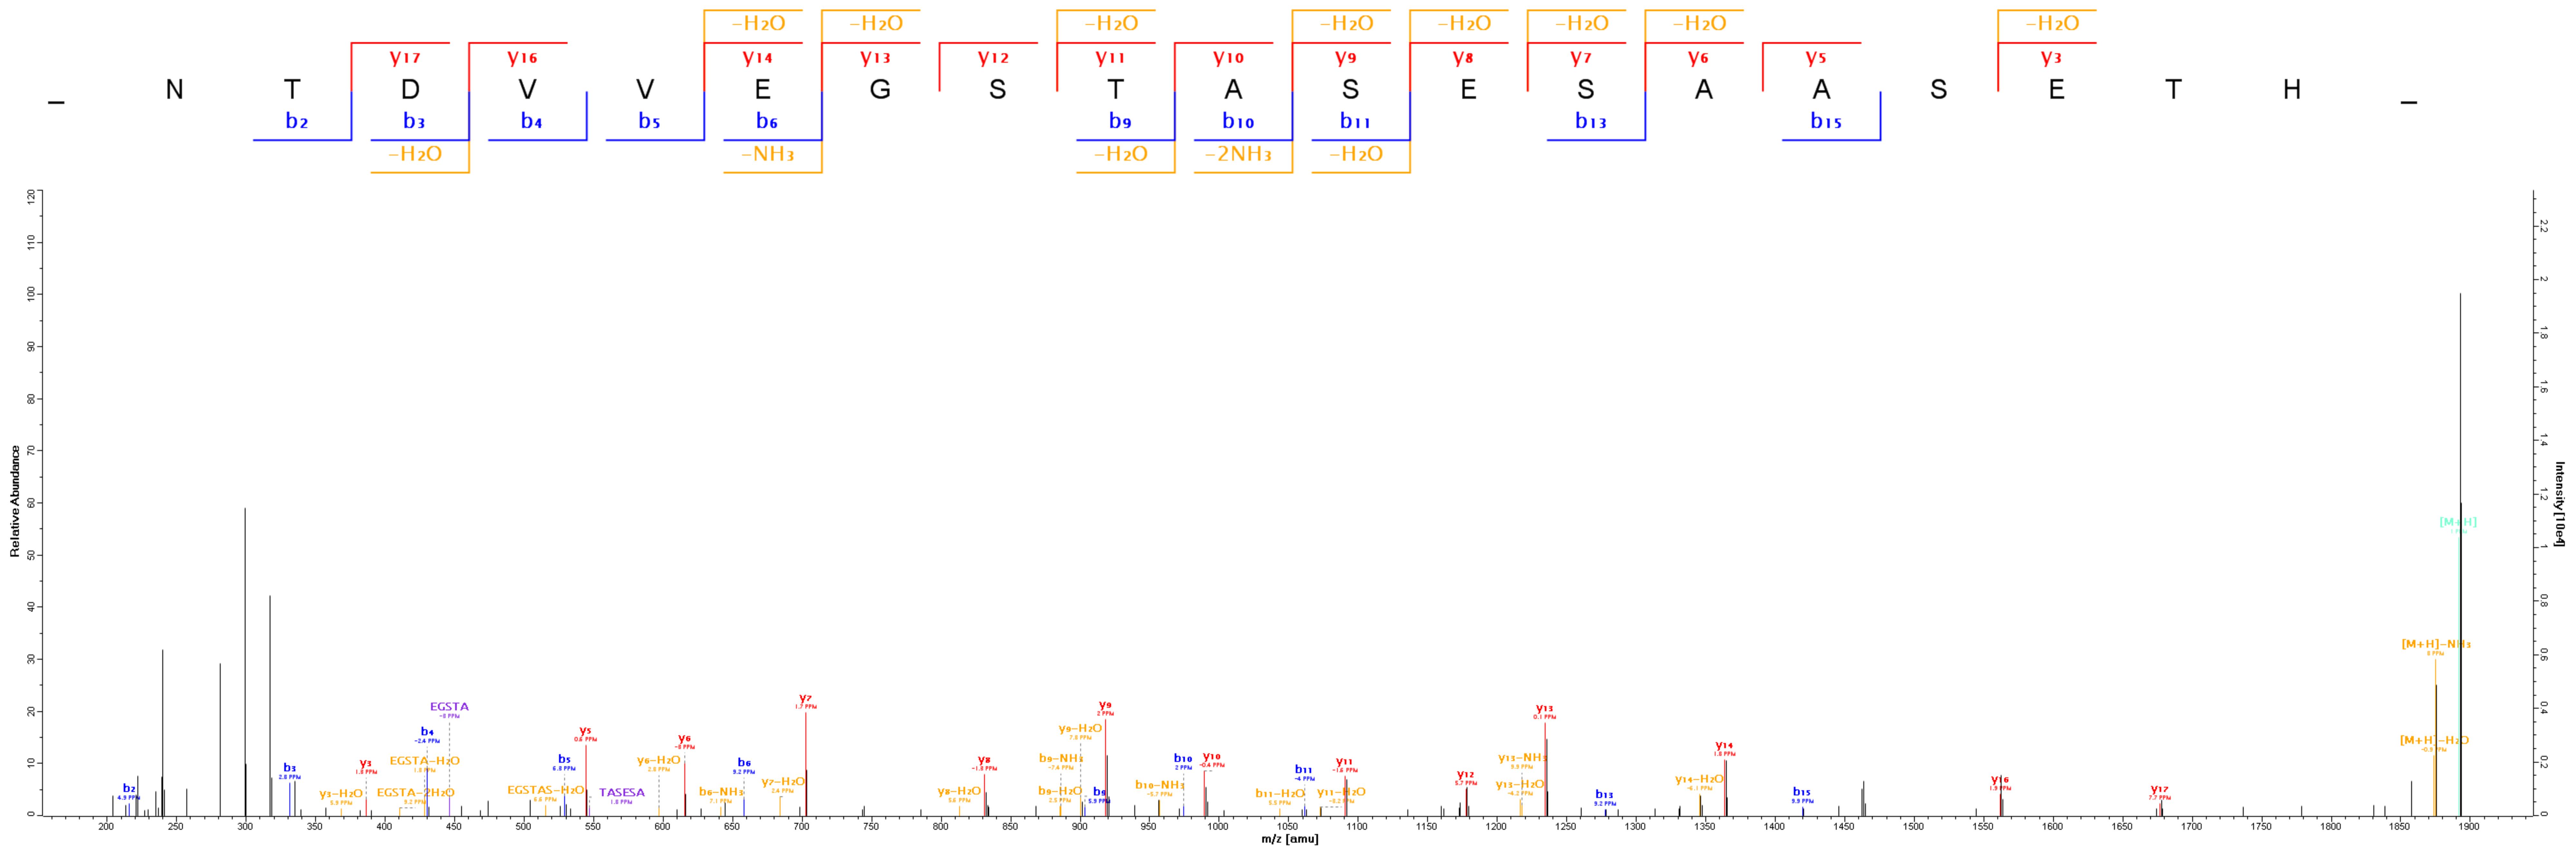

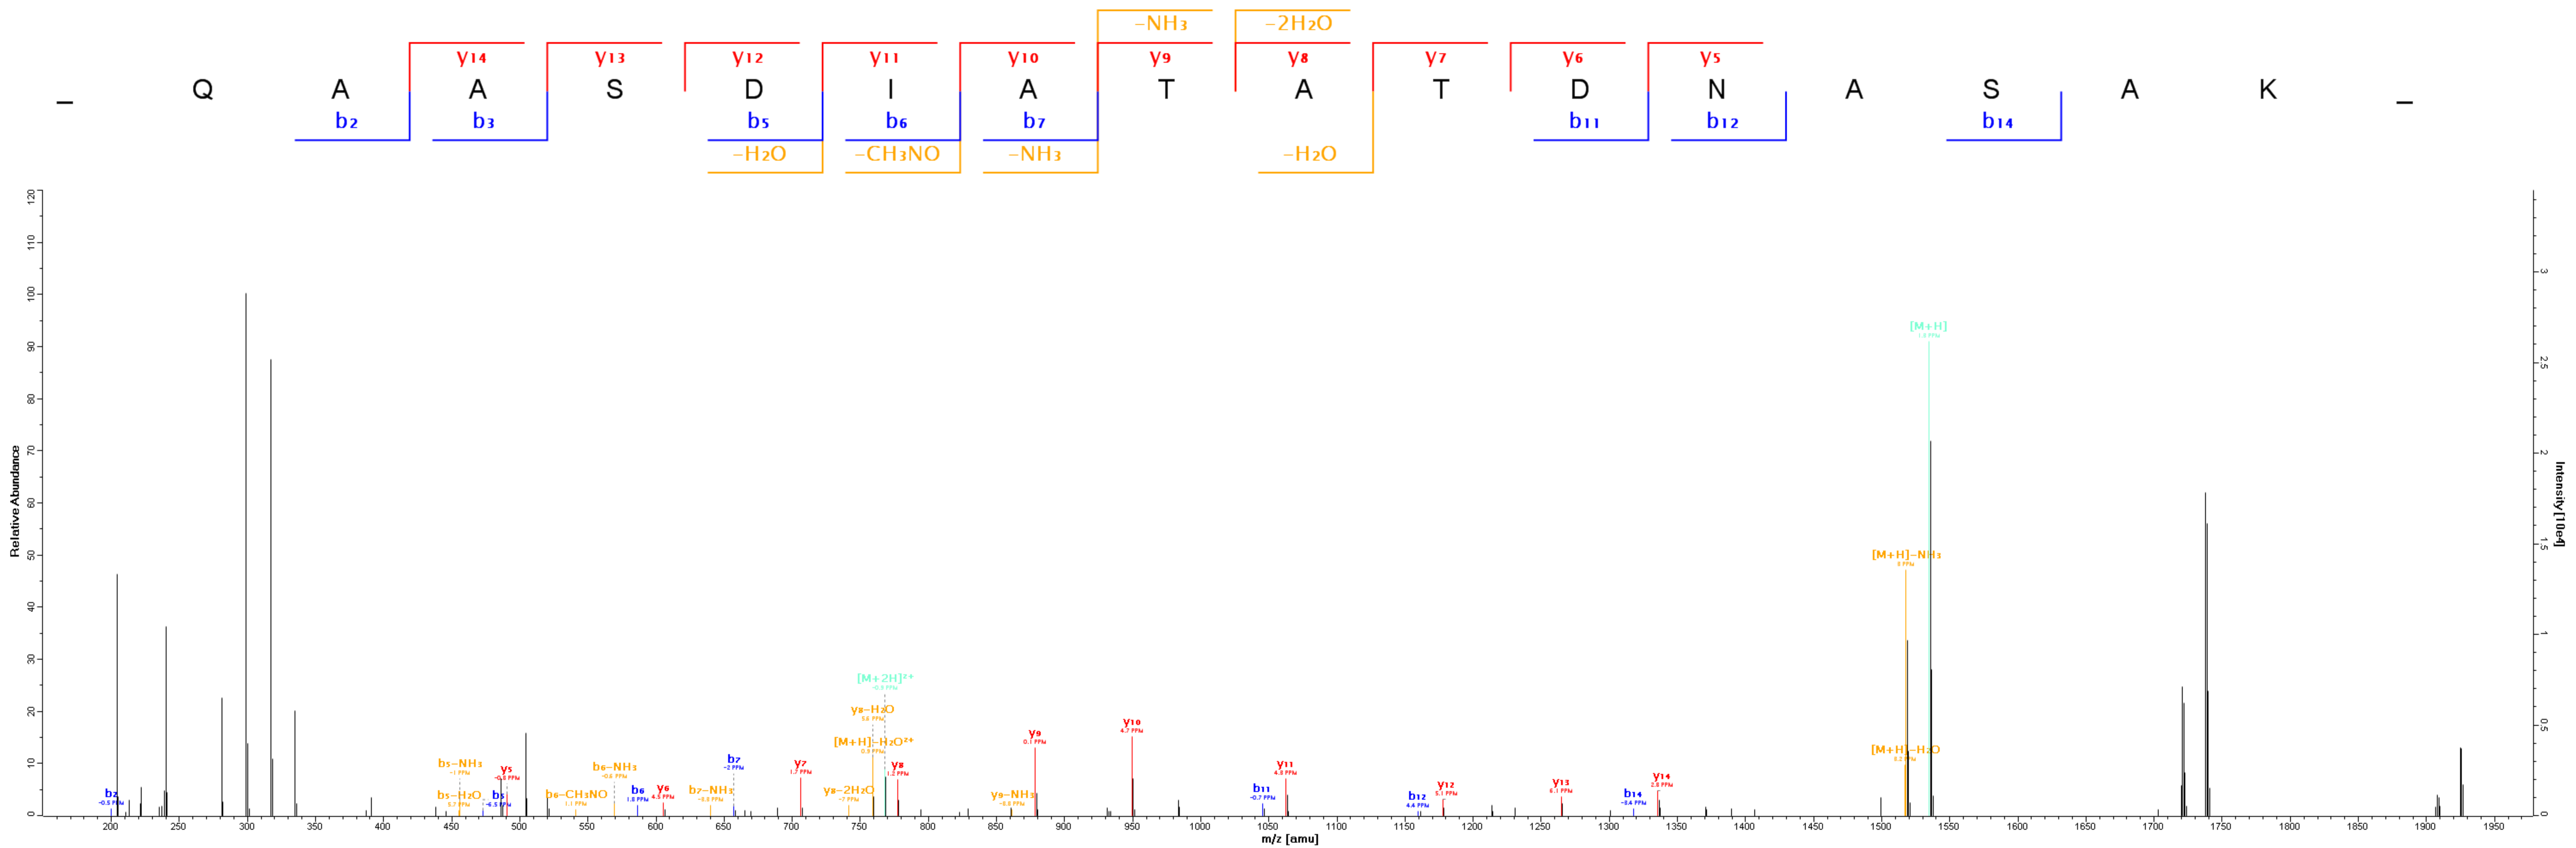







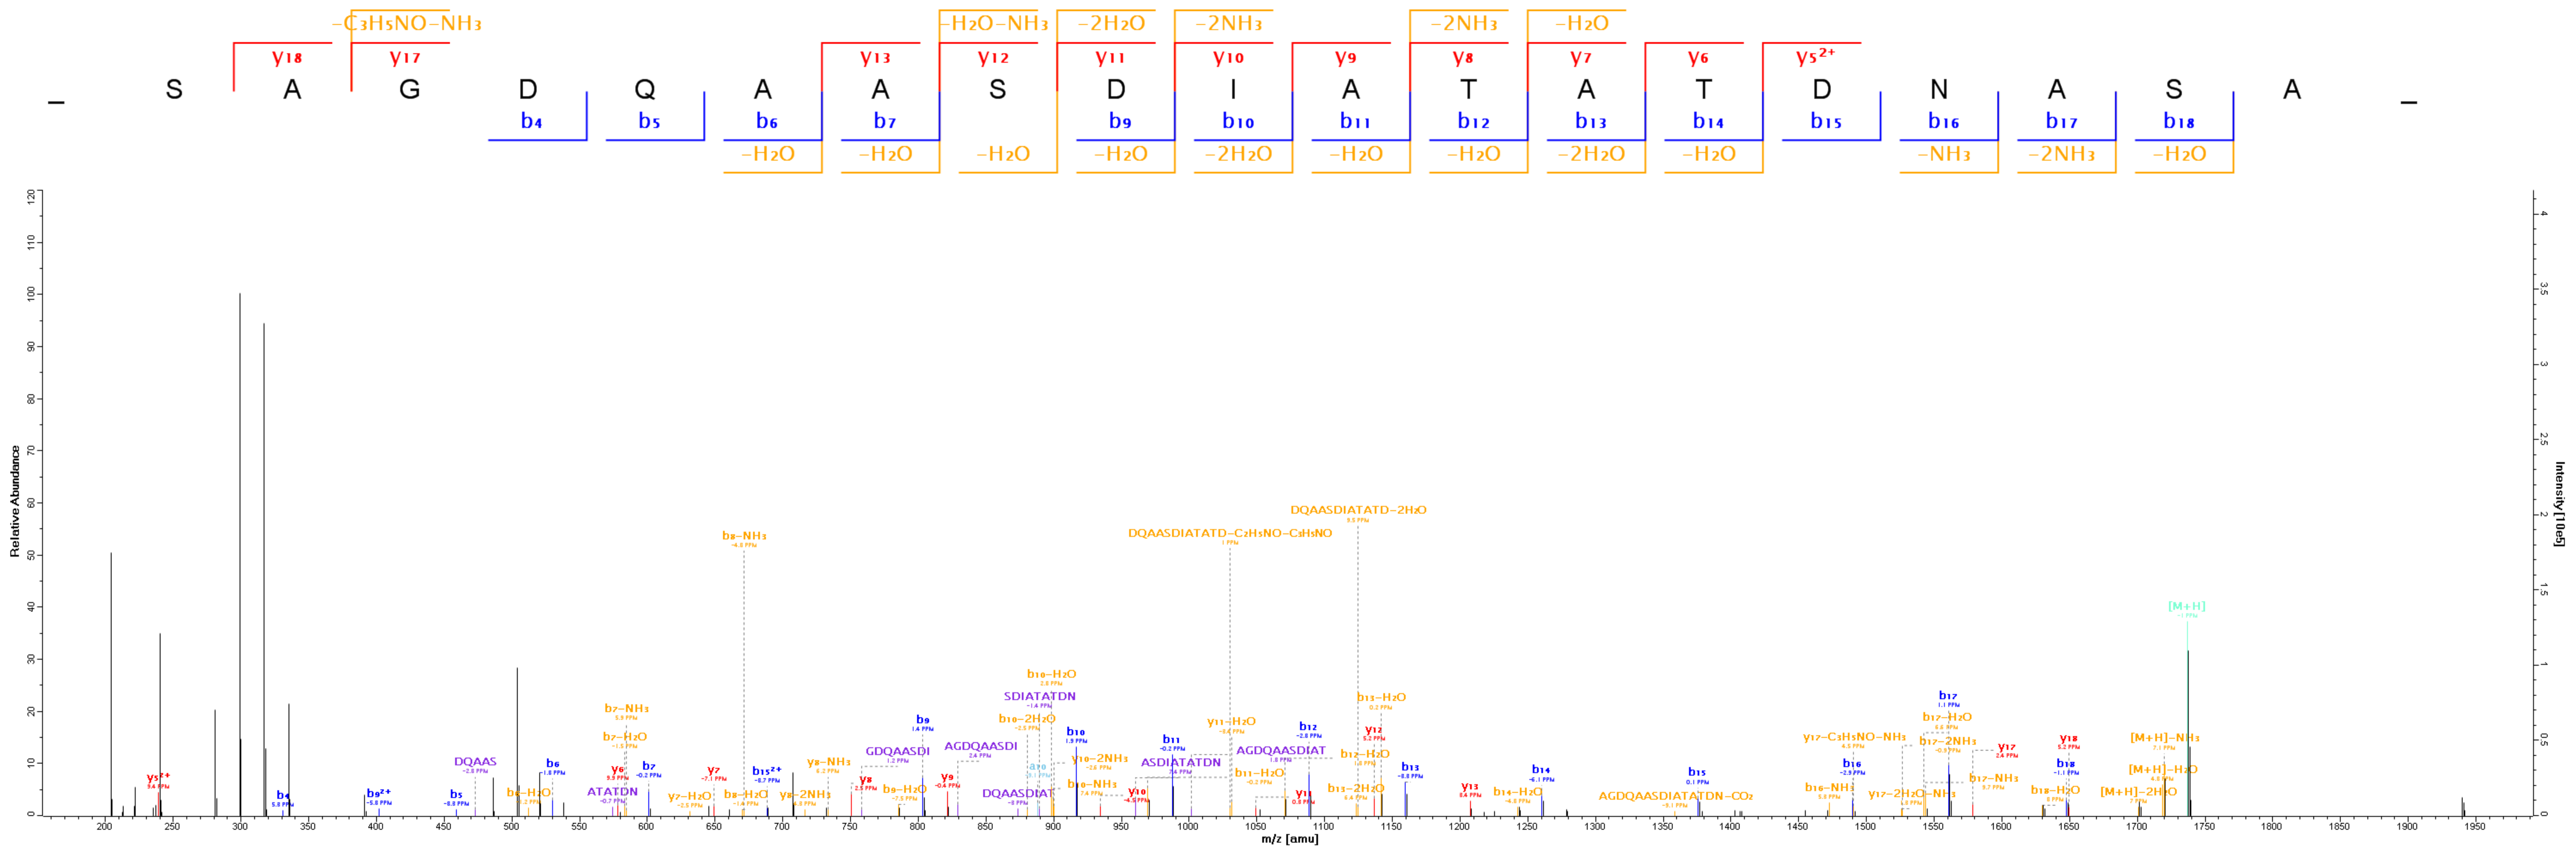

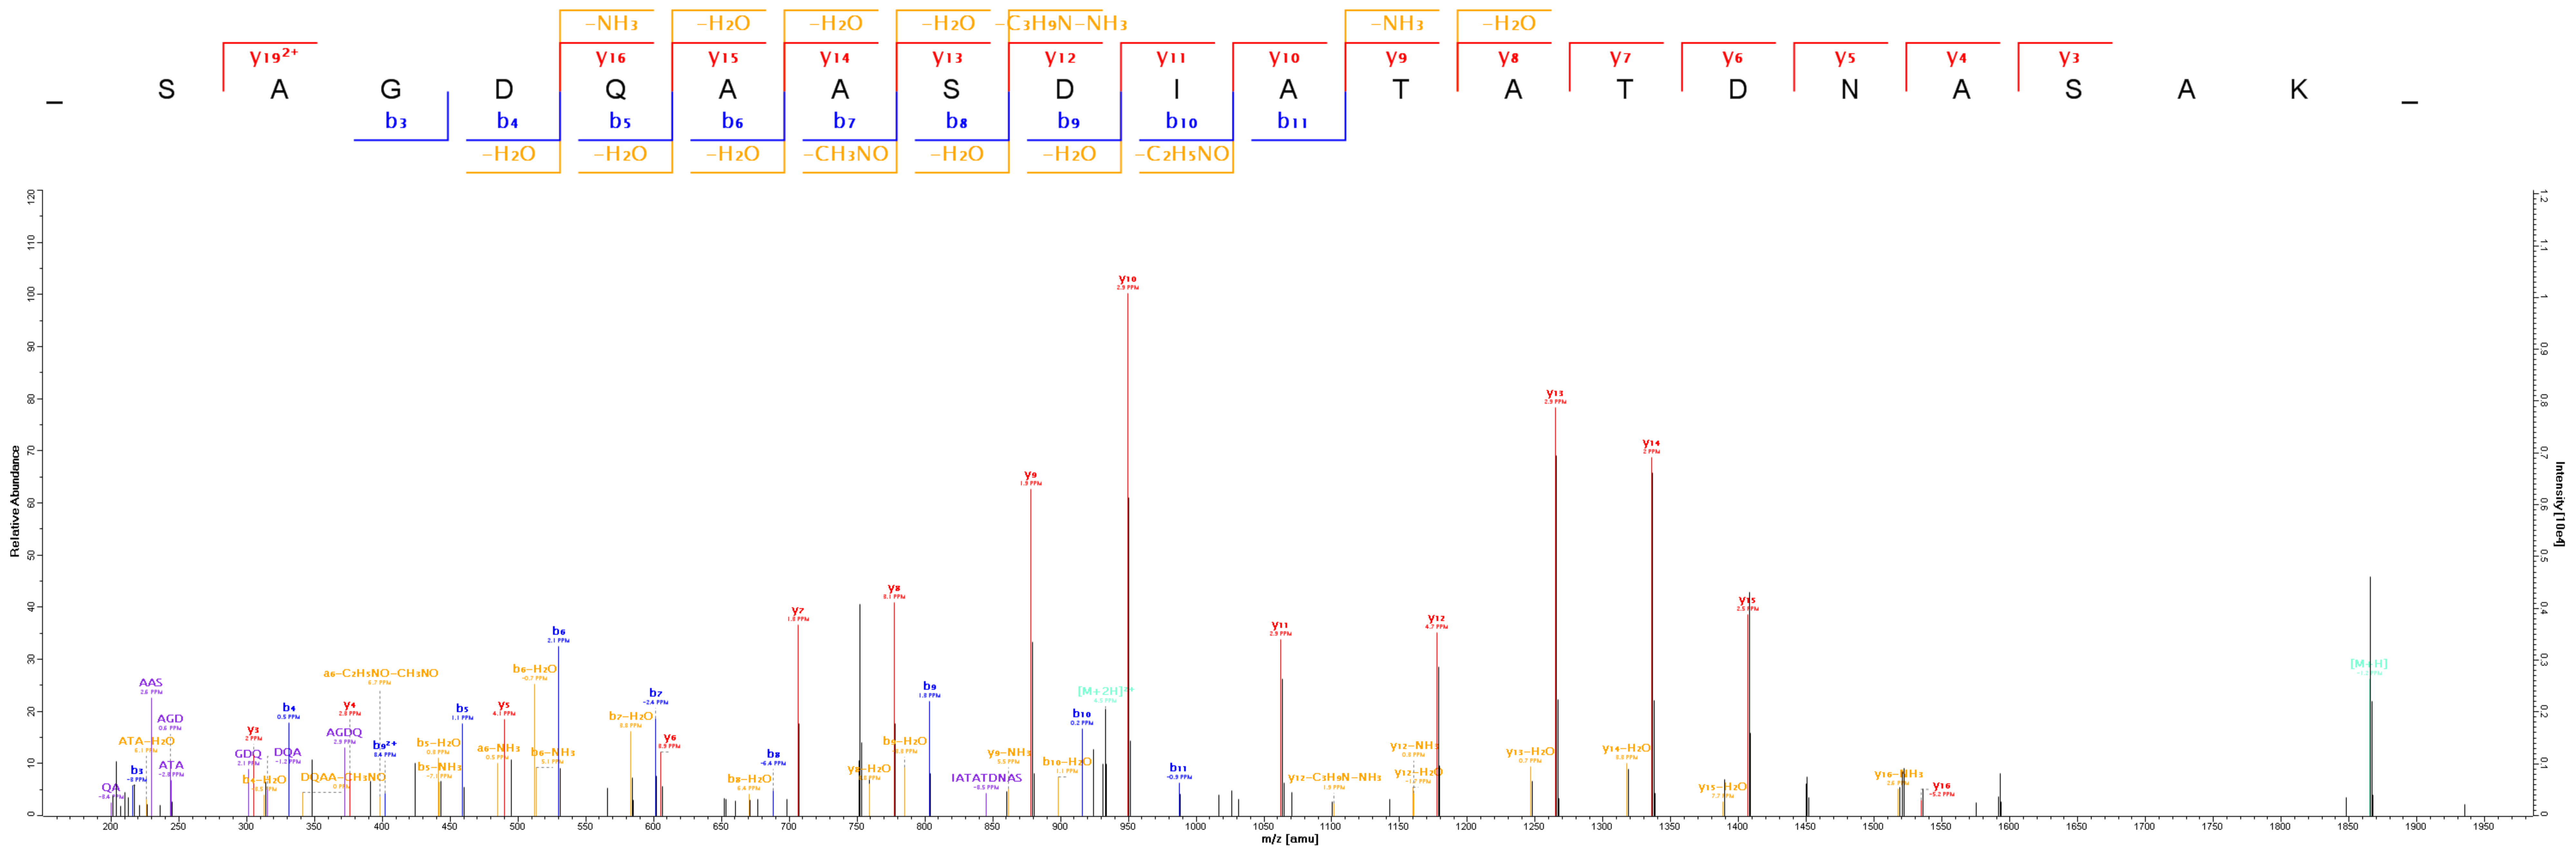

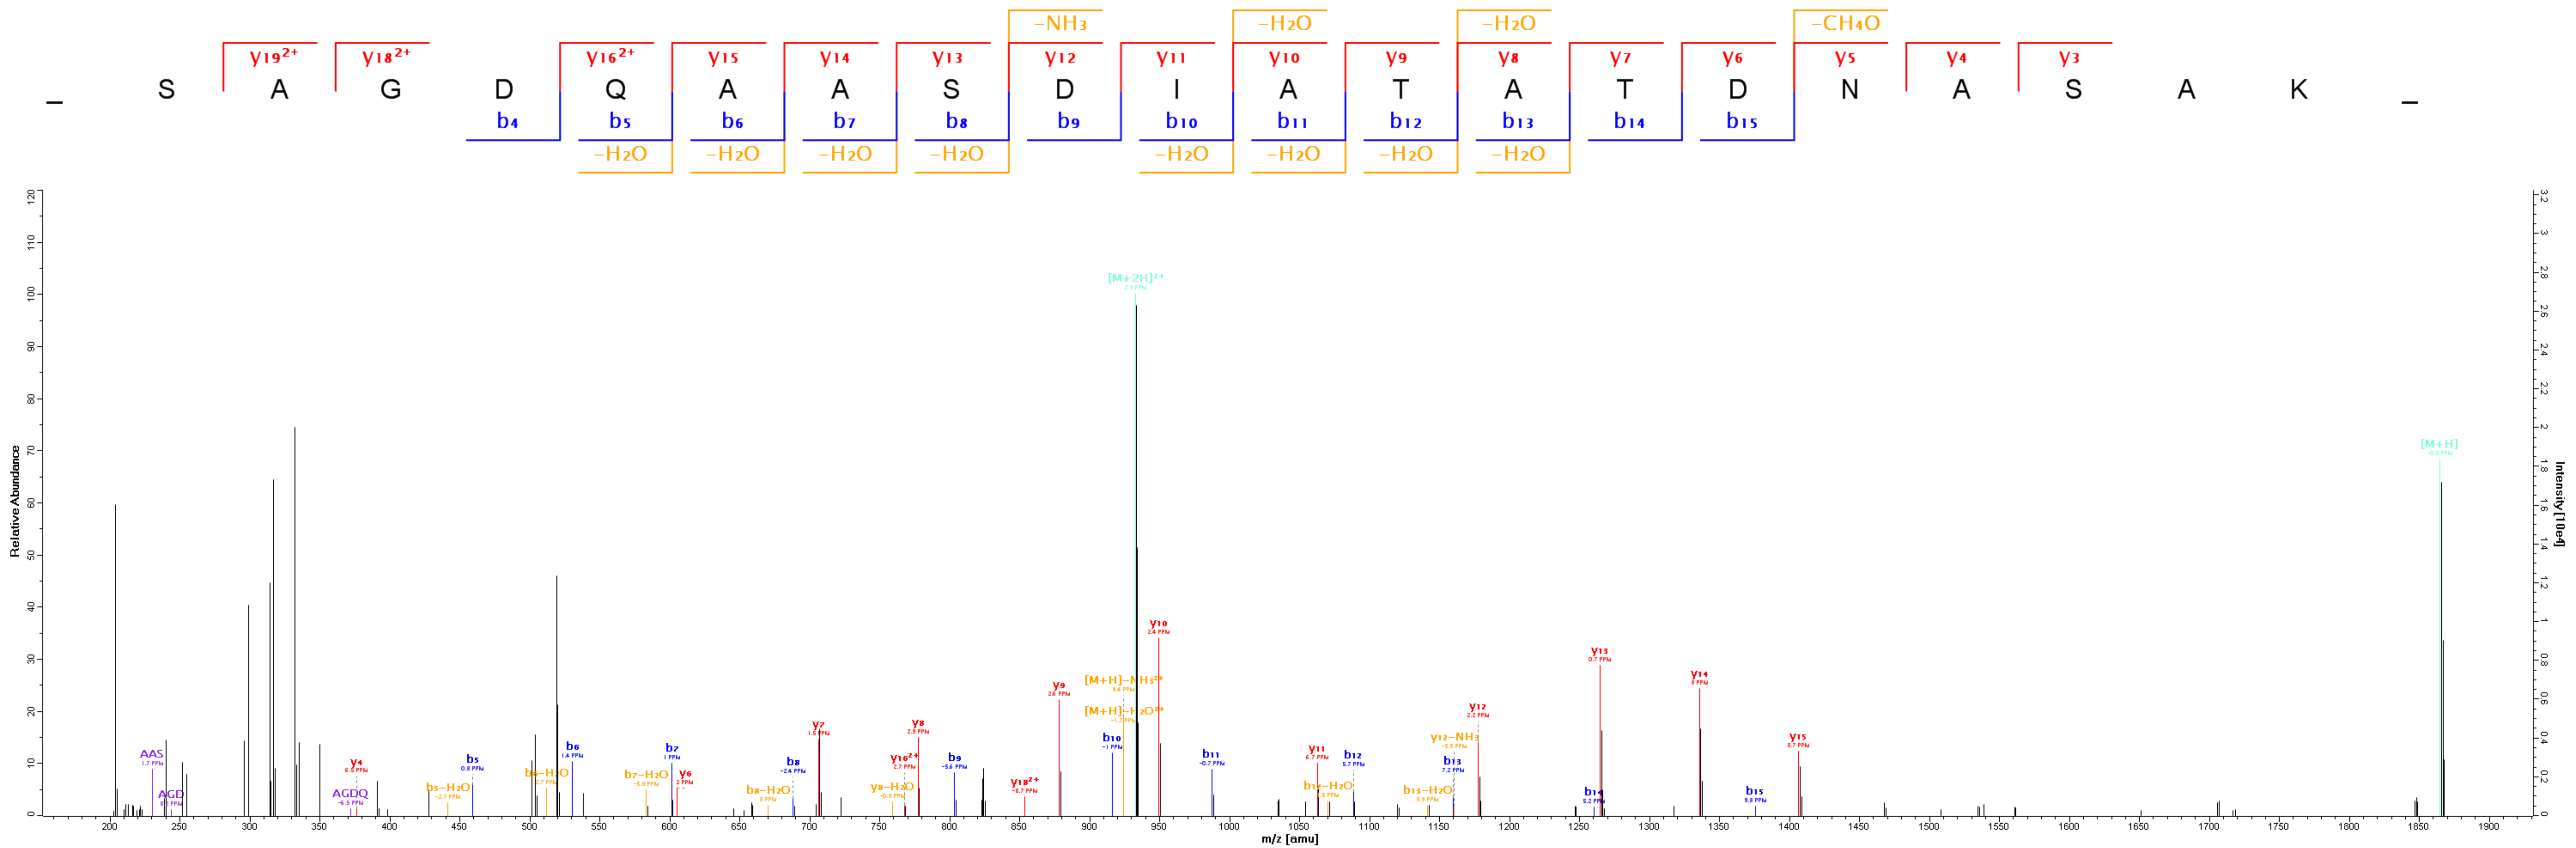

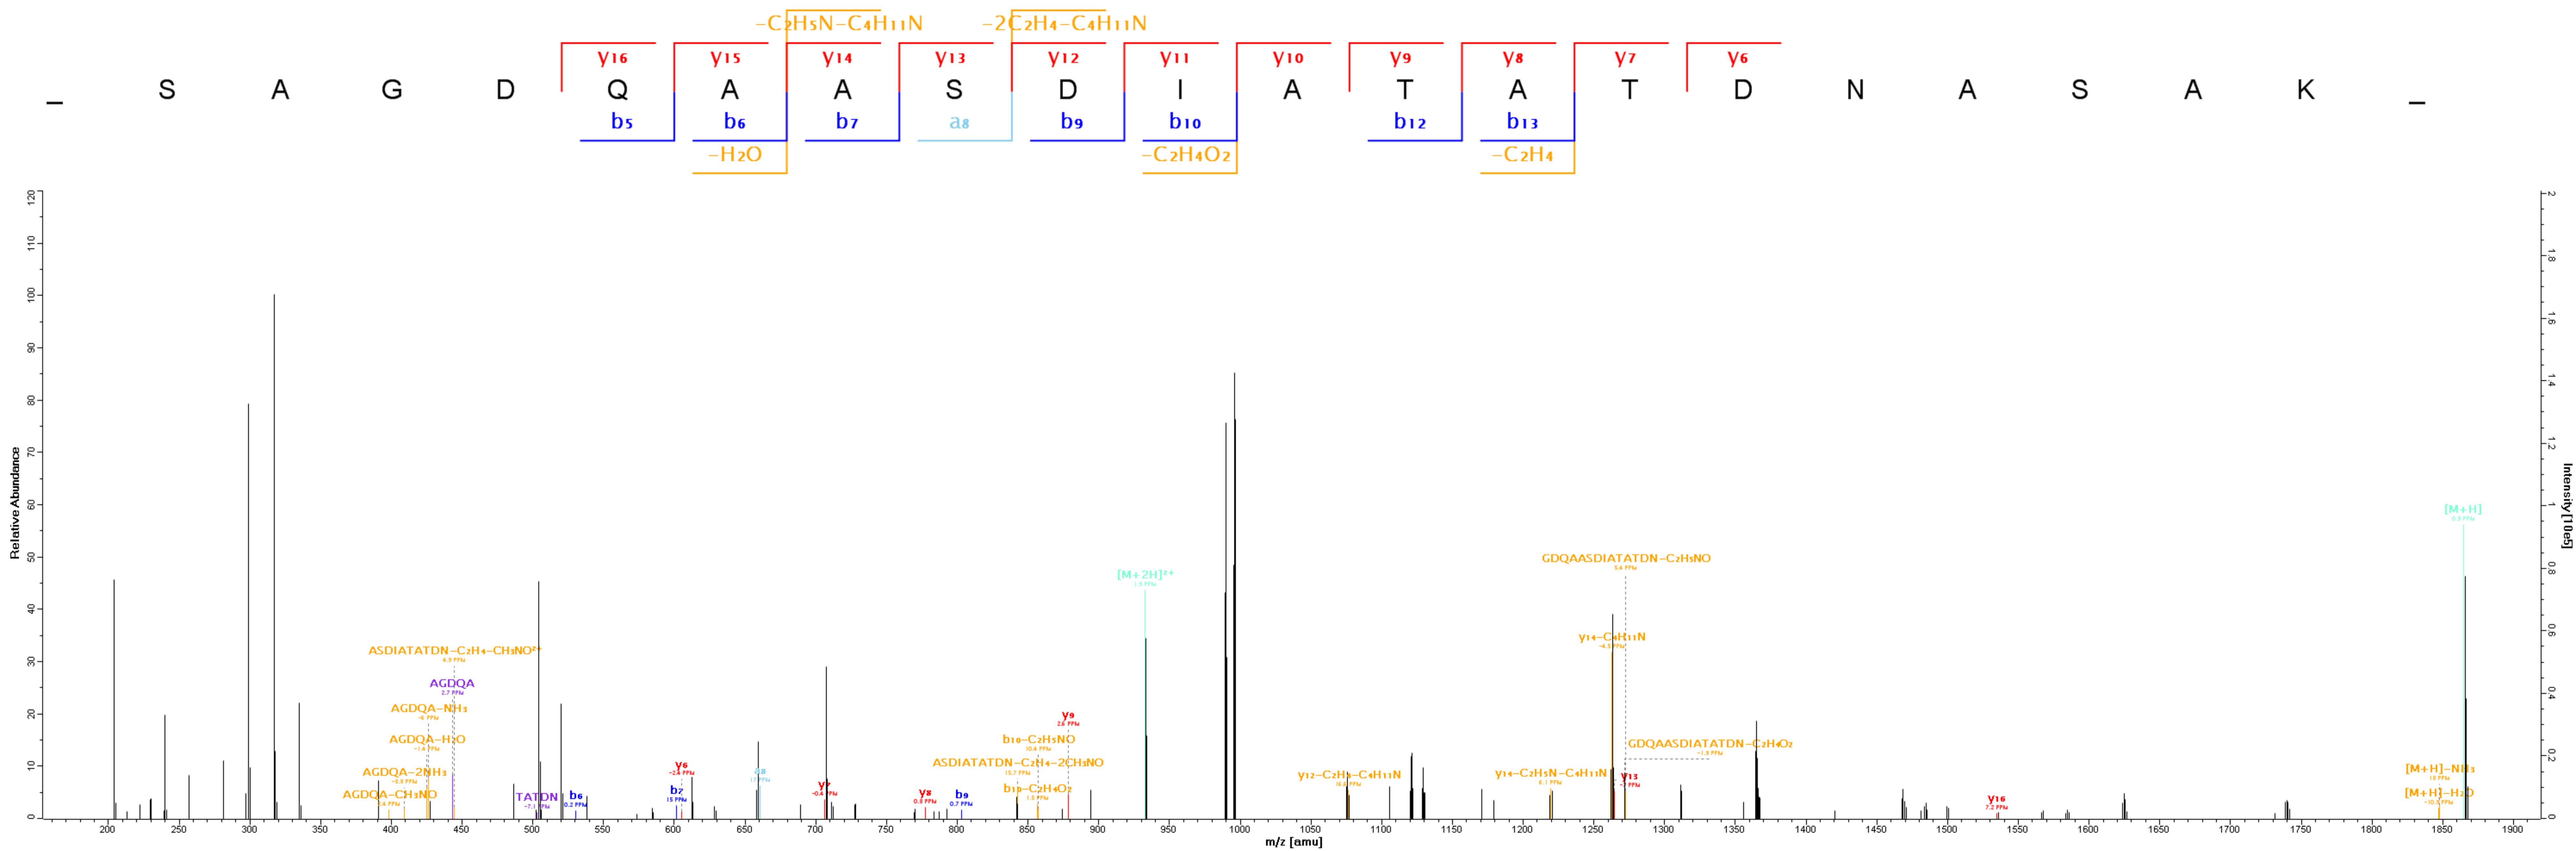

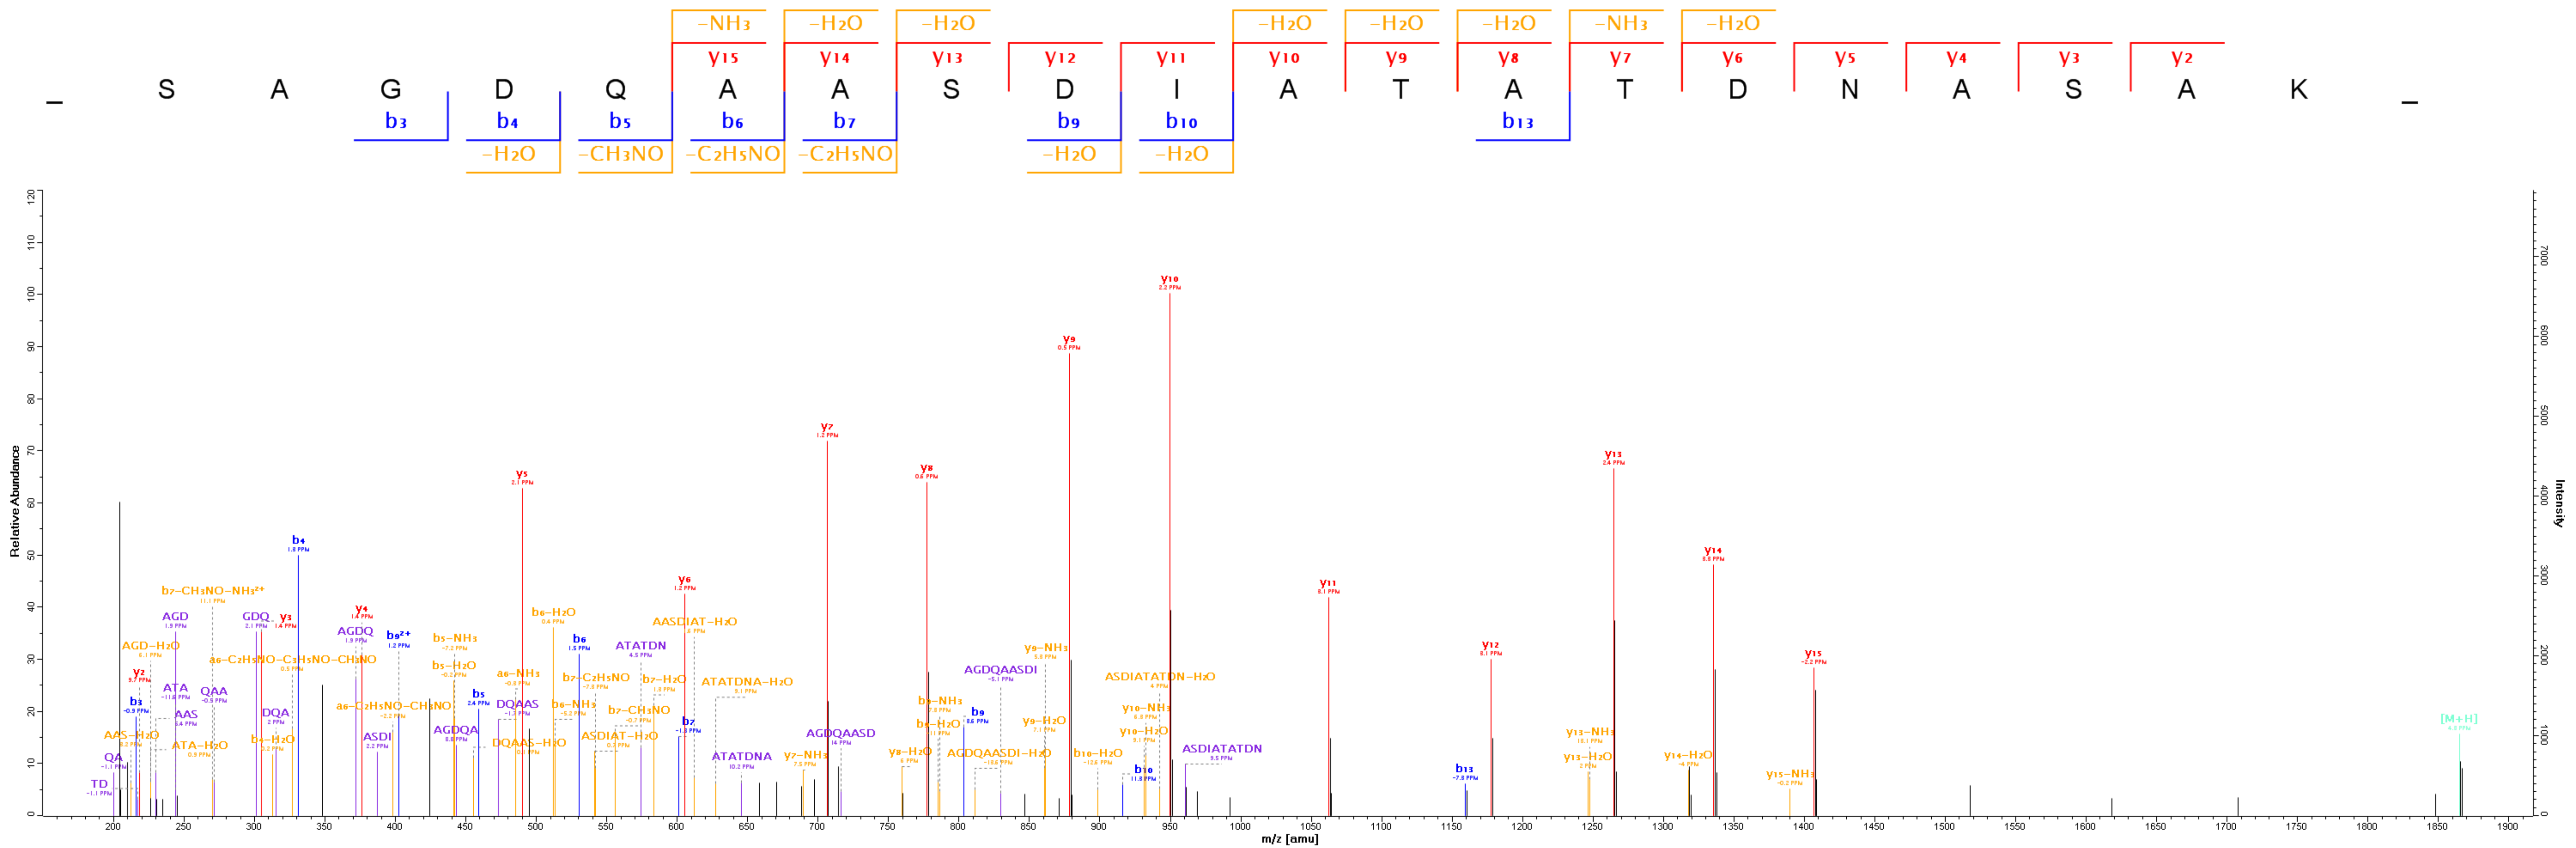

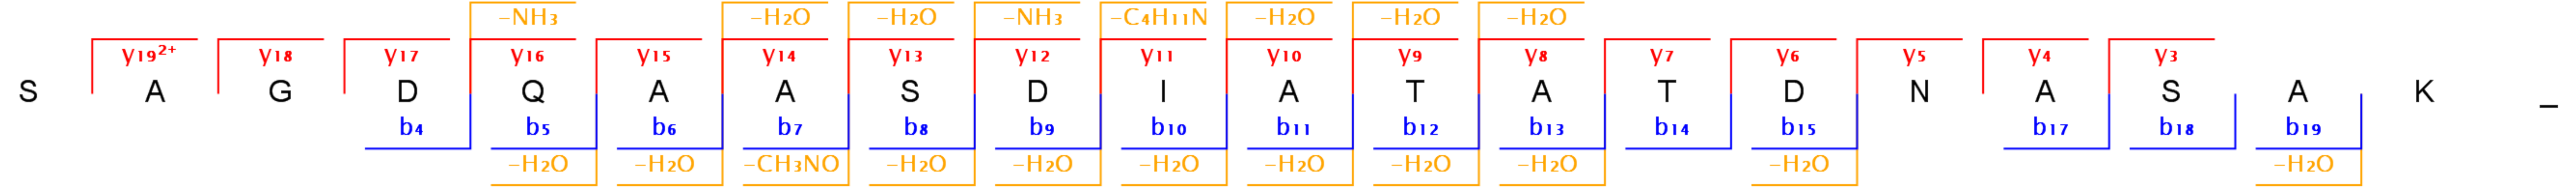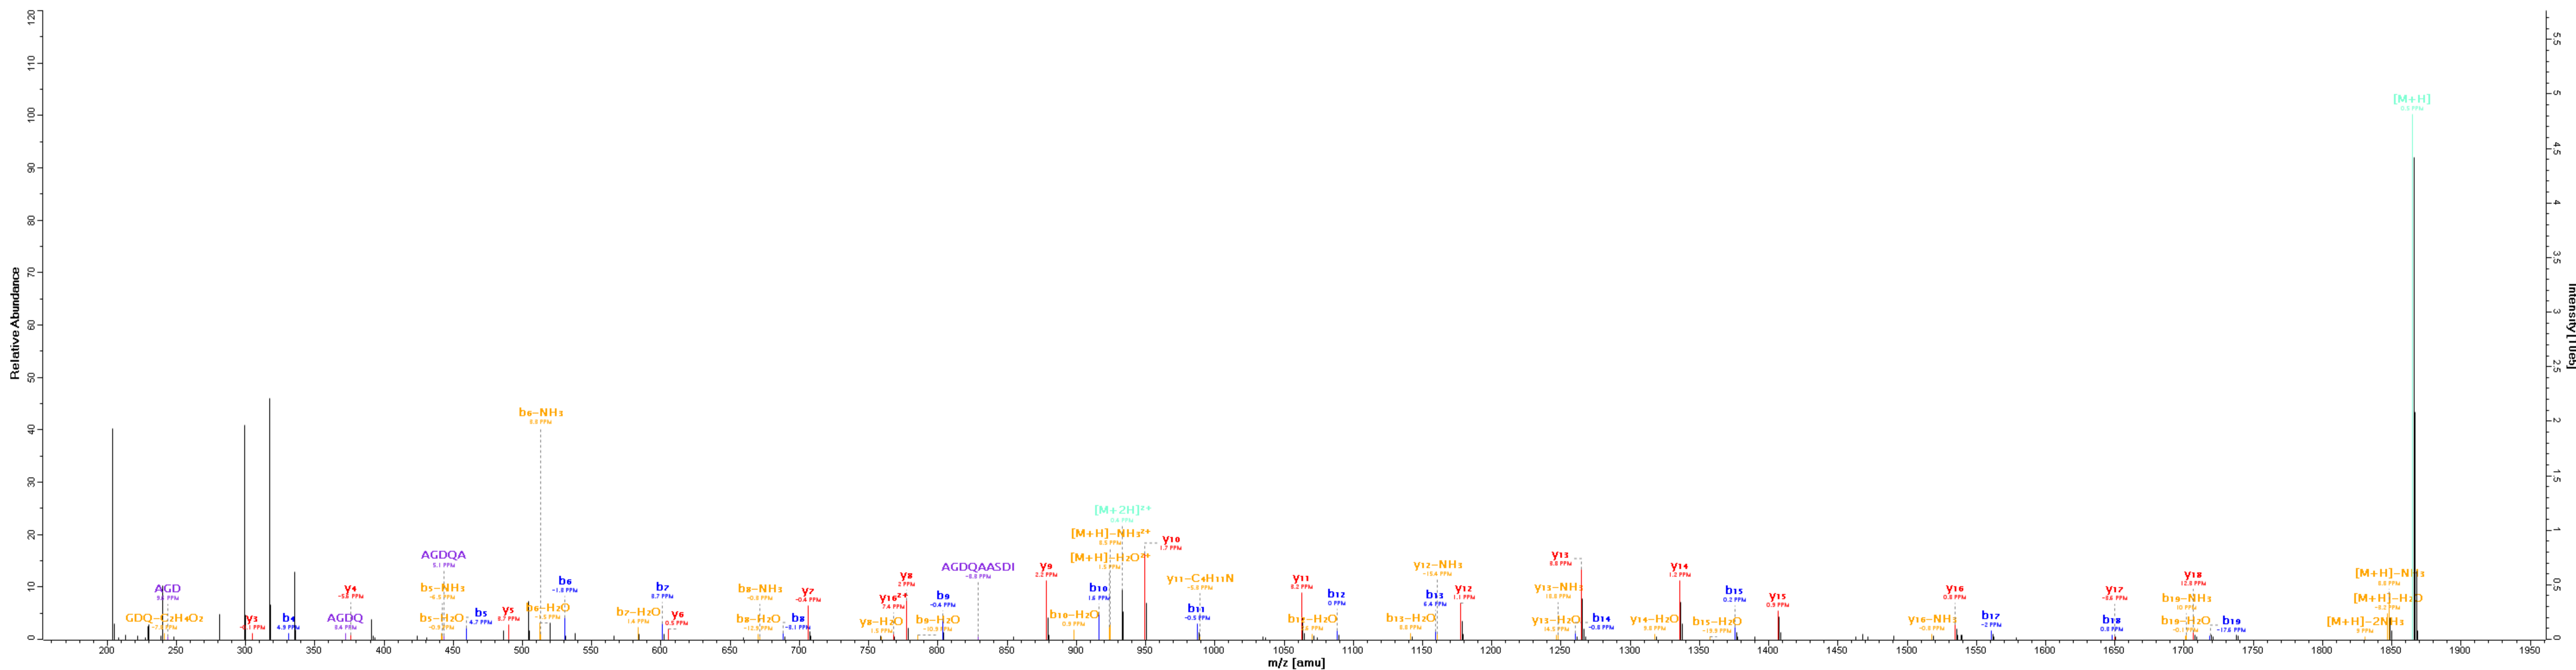



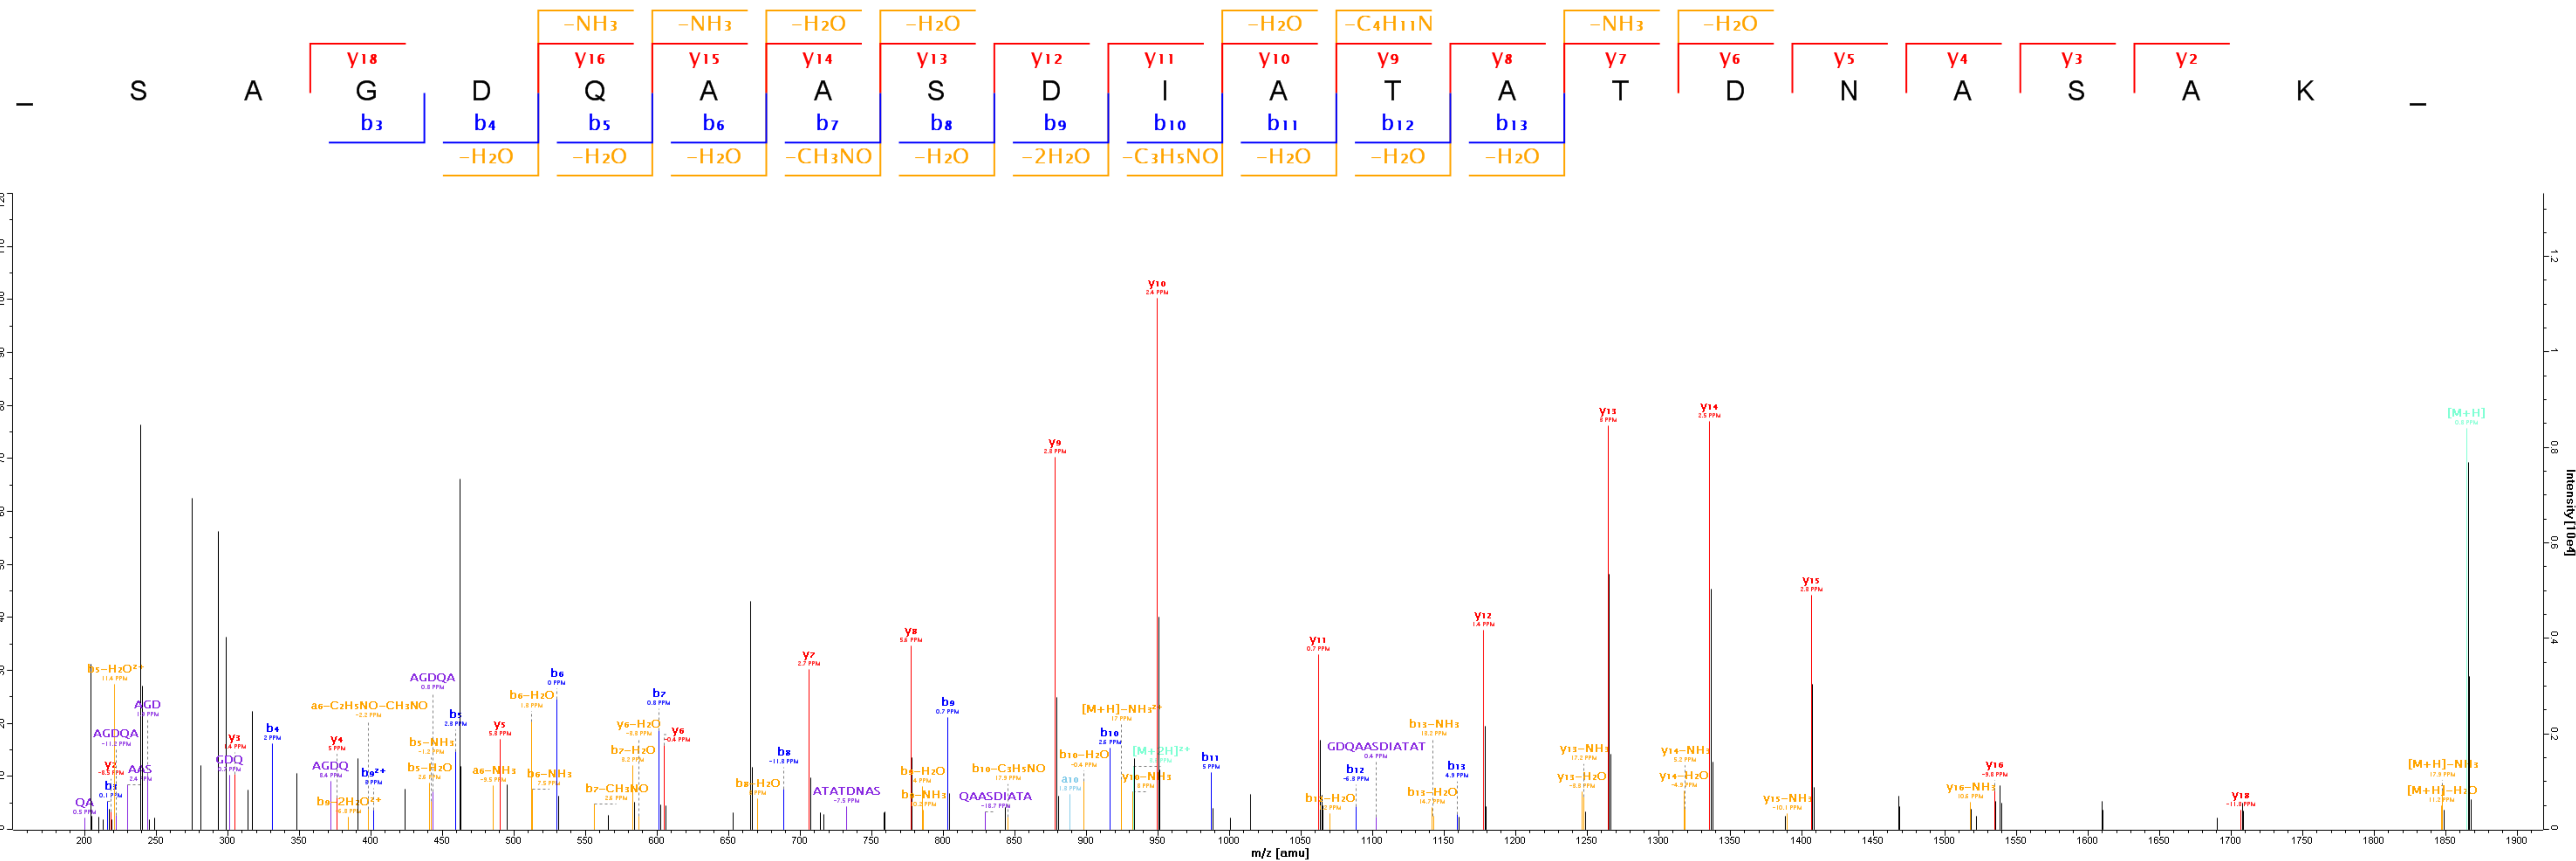

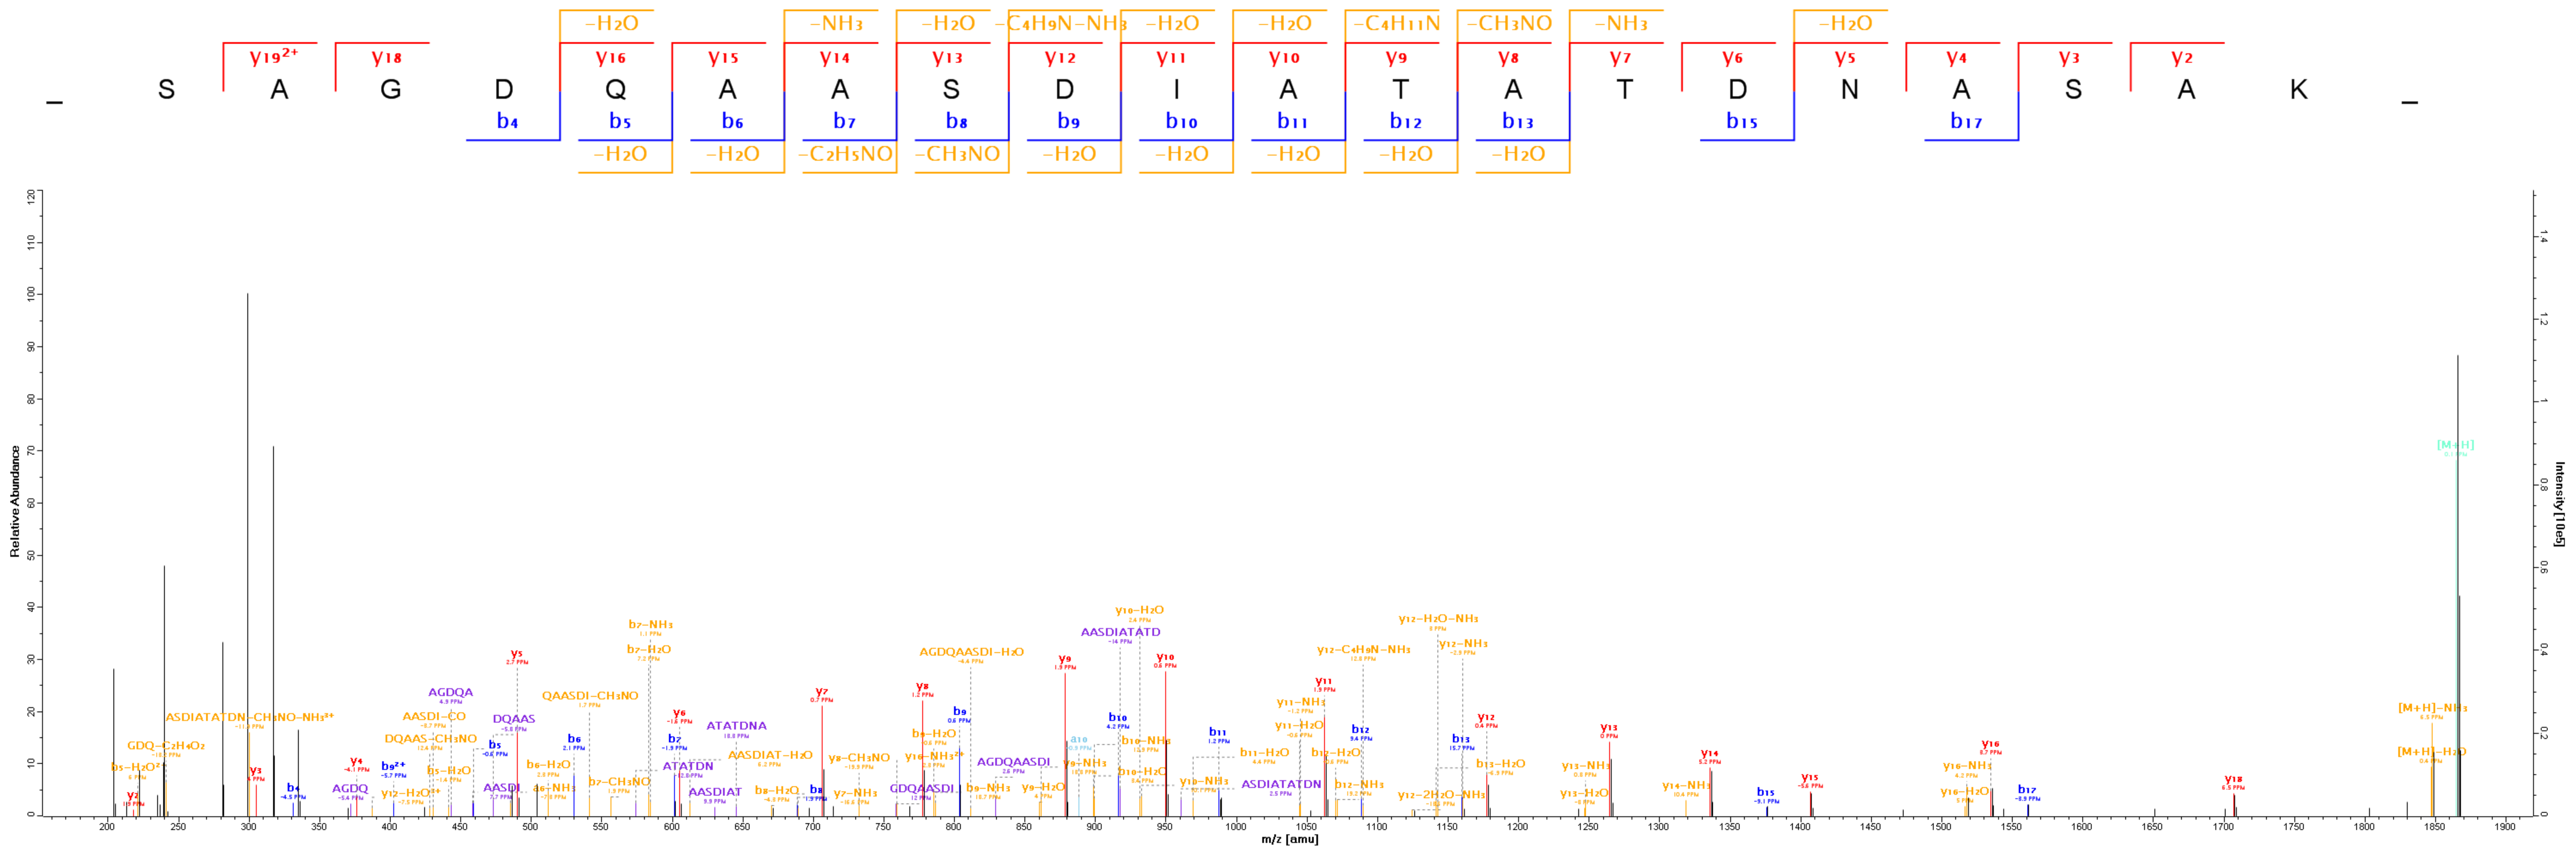

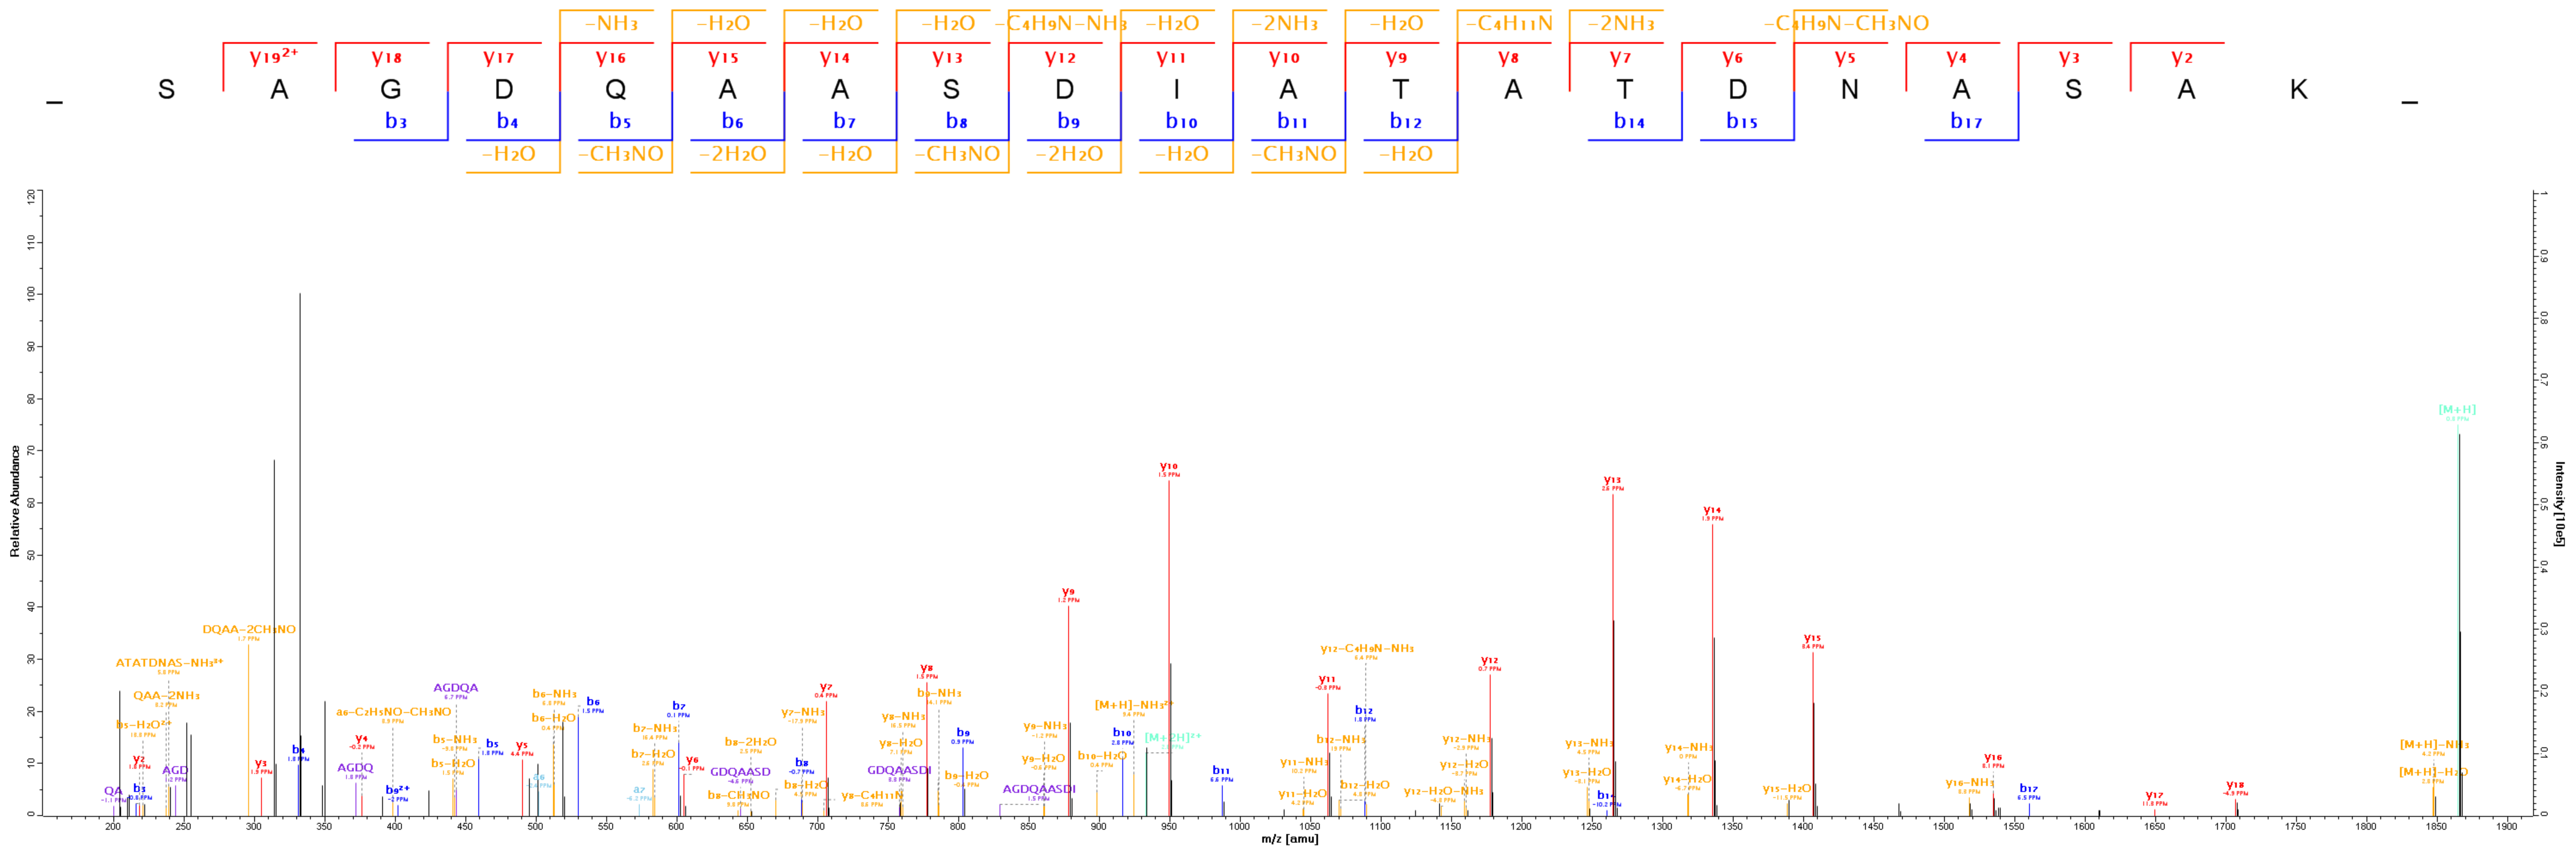

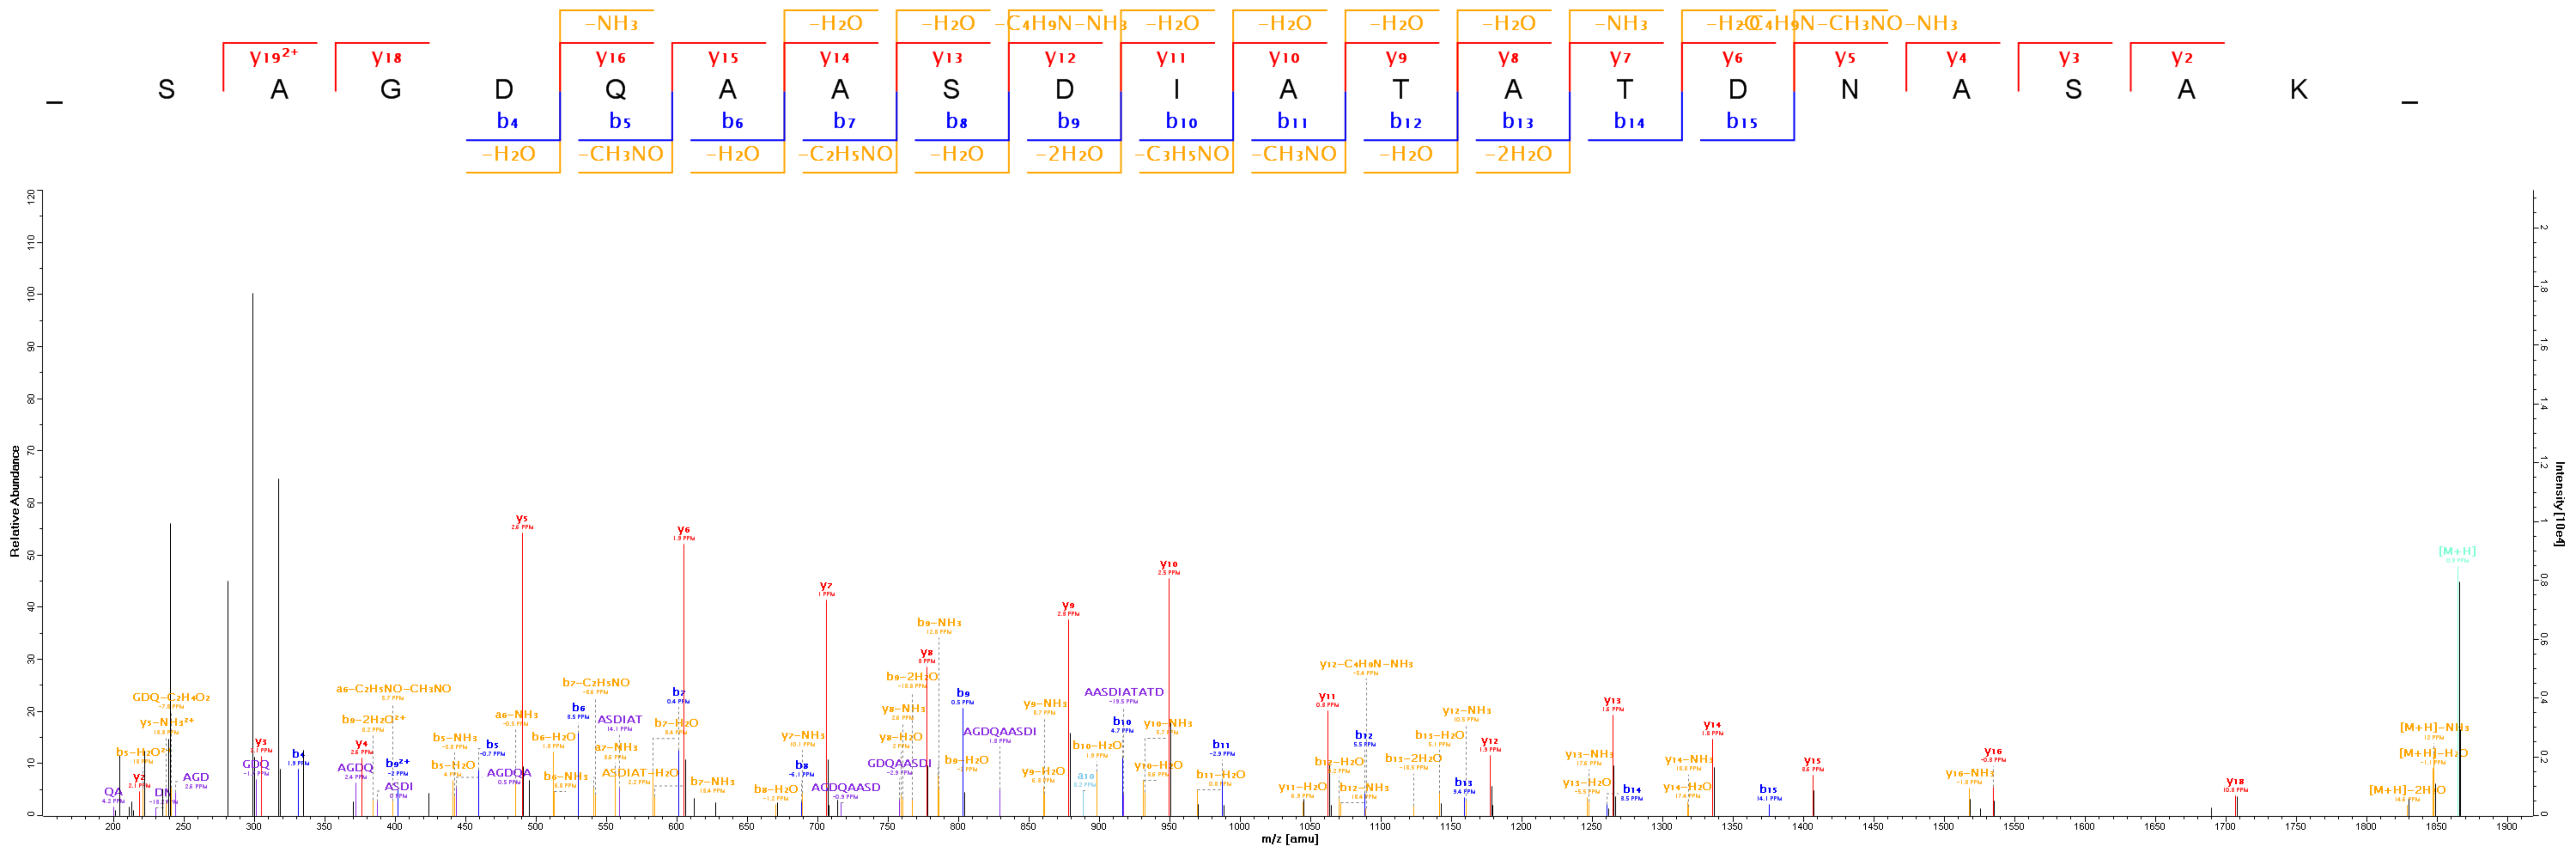

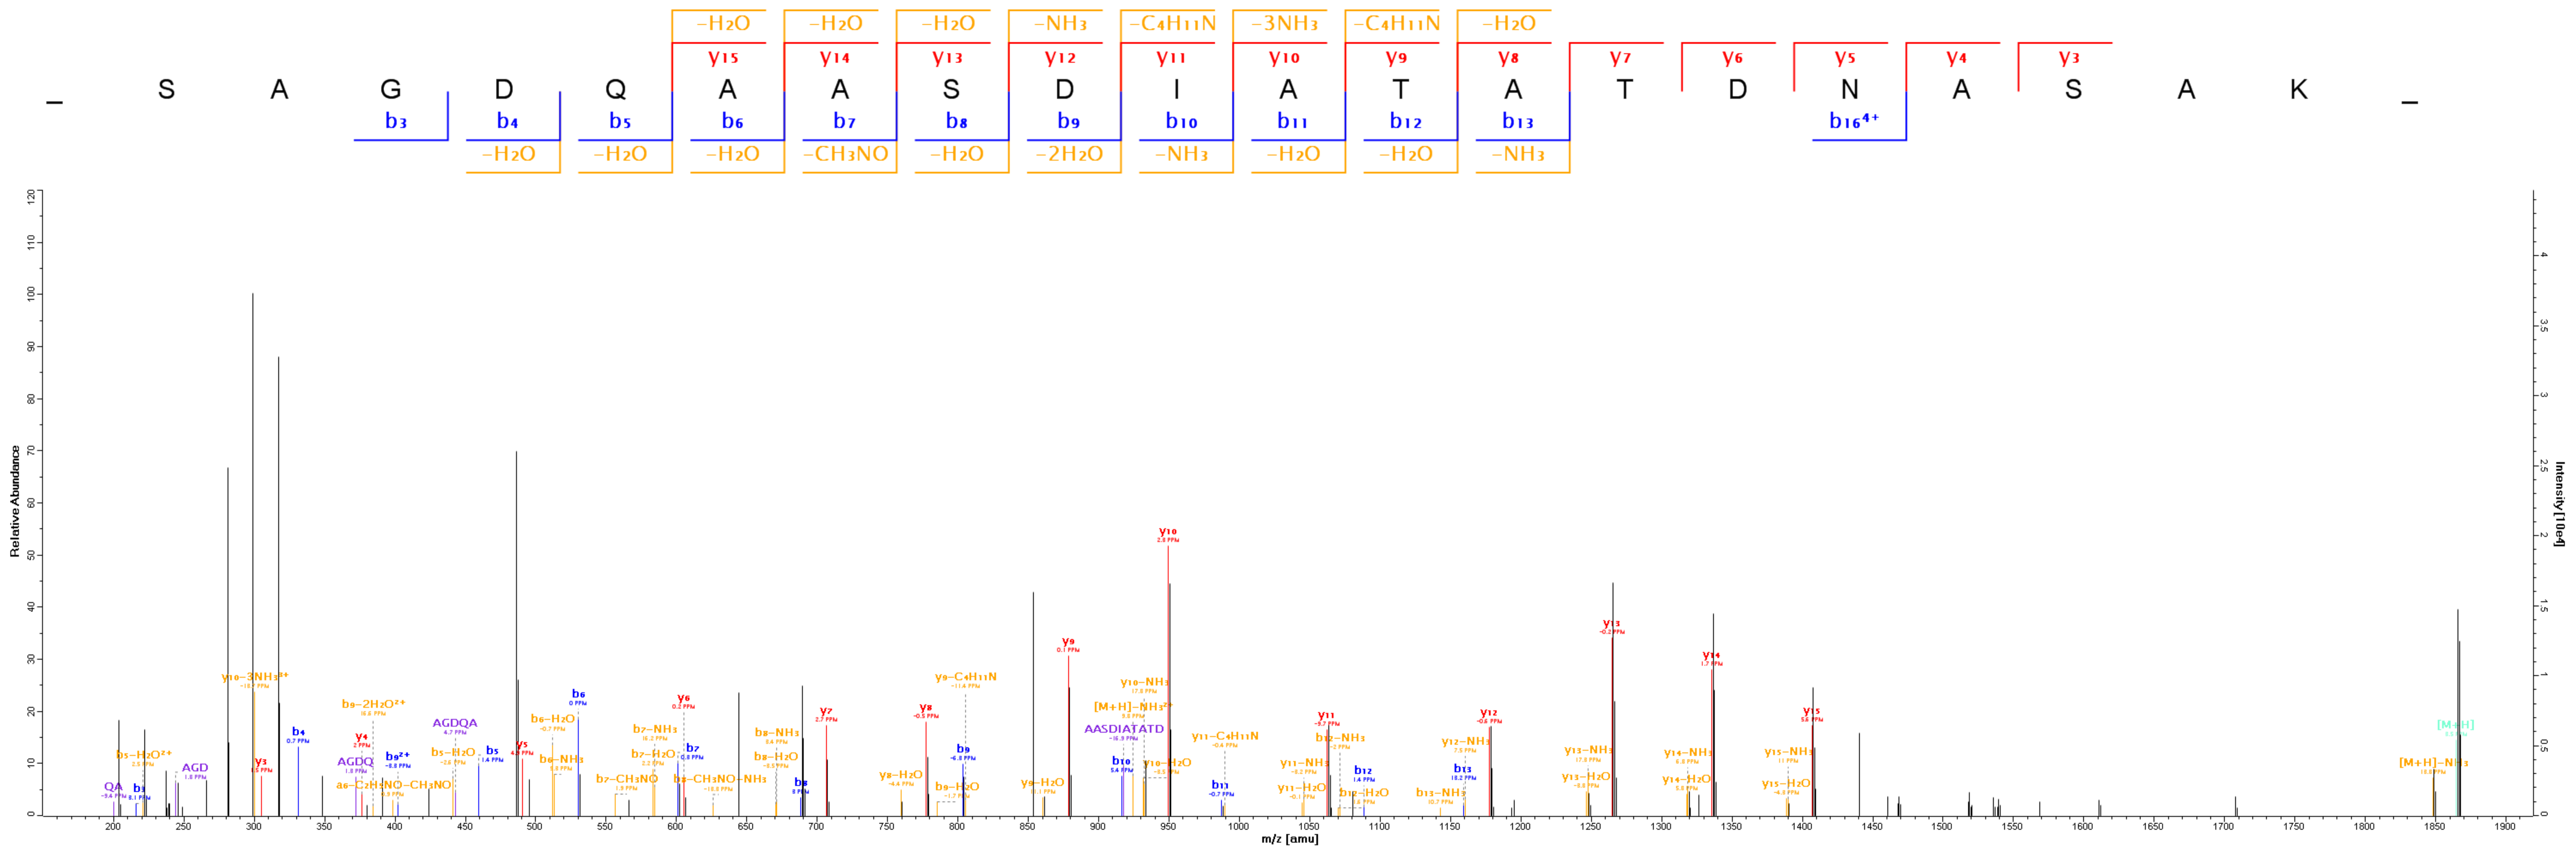

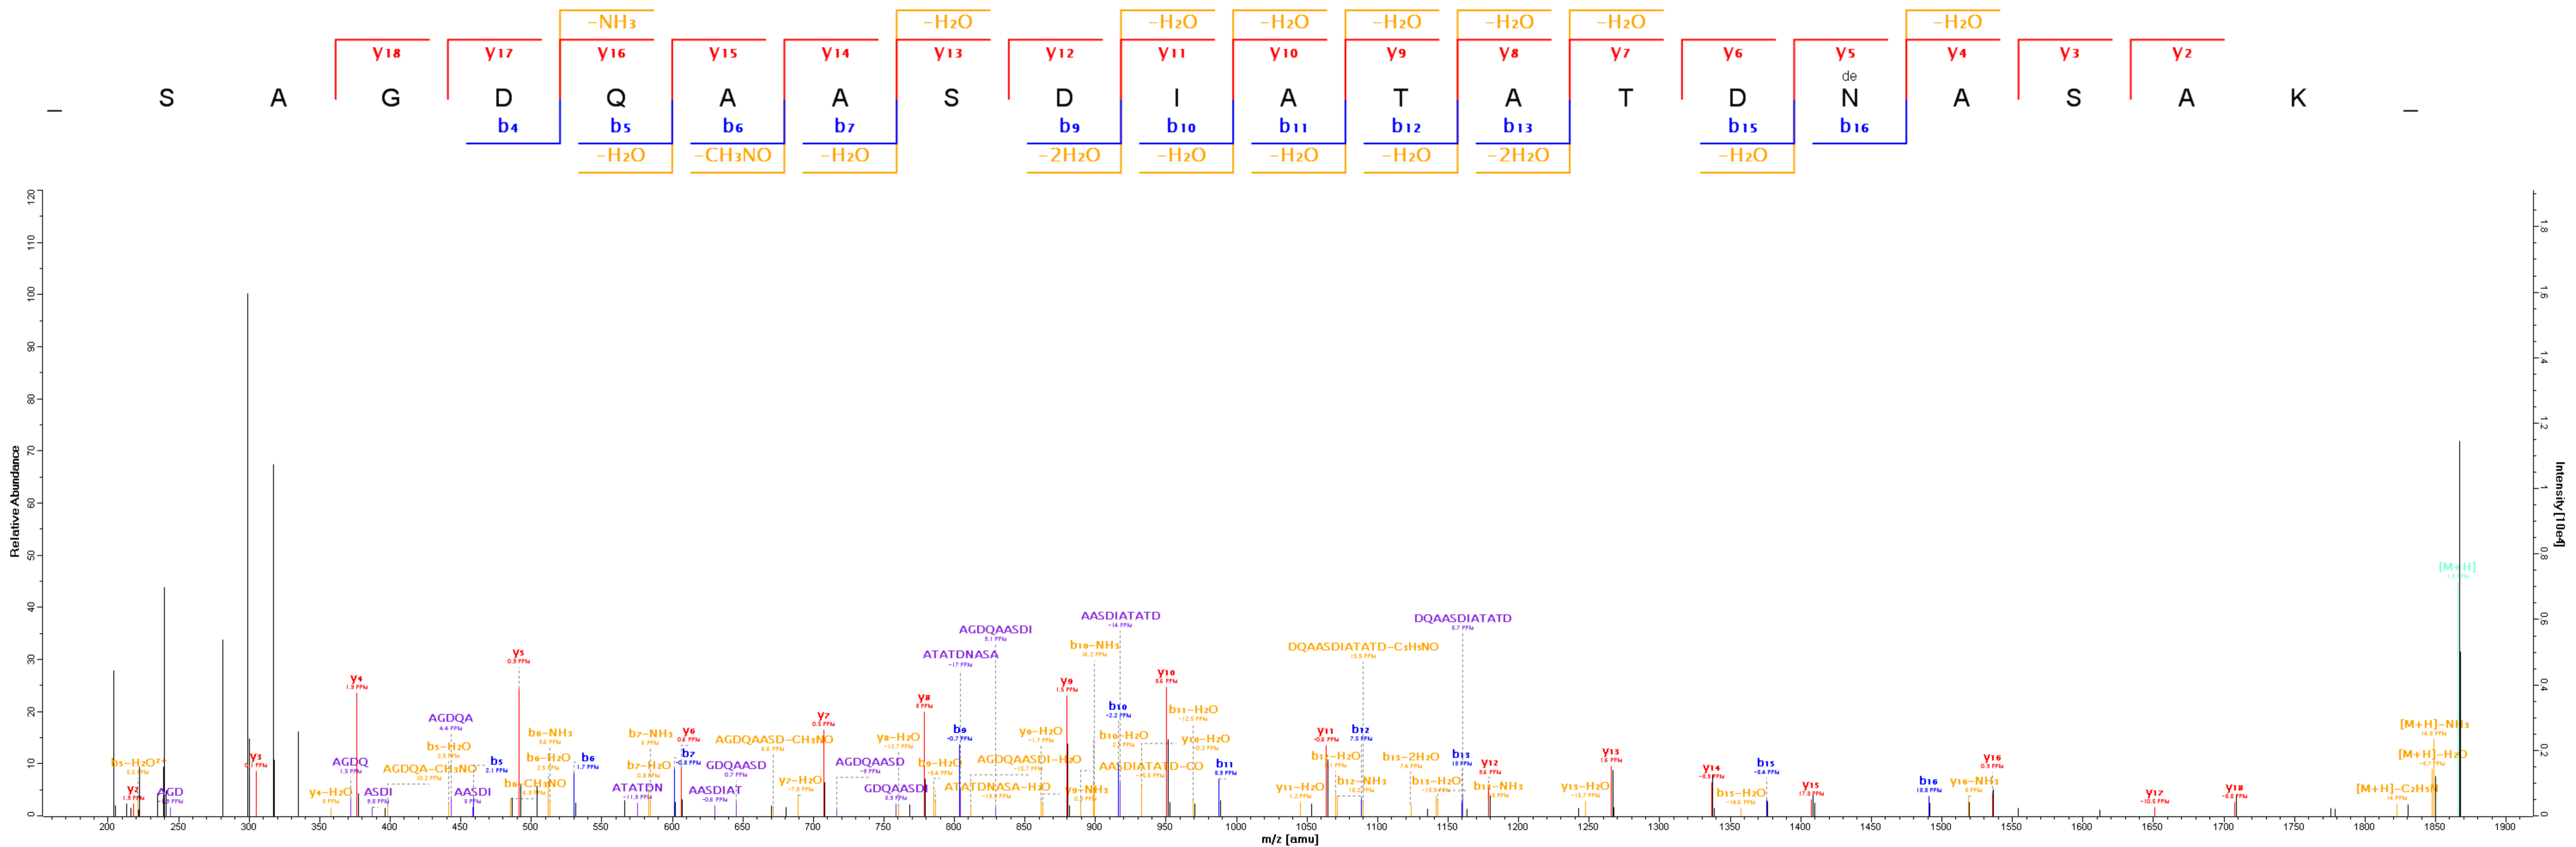

S A G D Q A A S D I A T A T D N A S A K

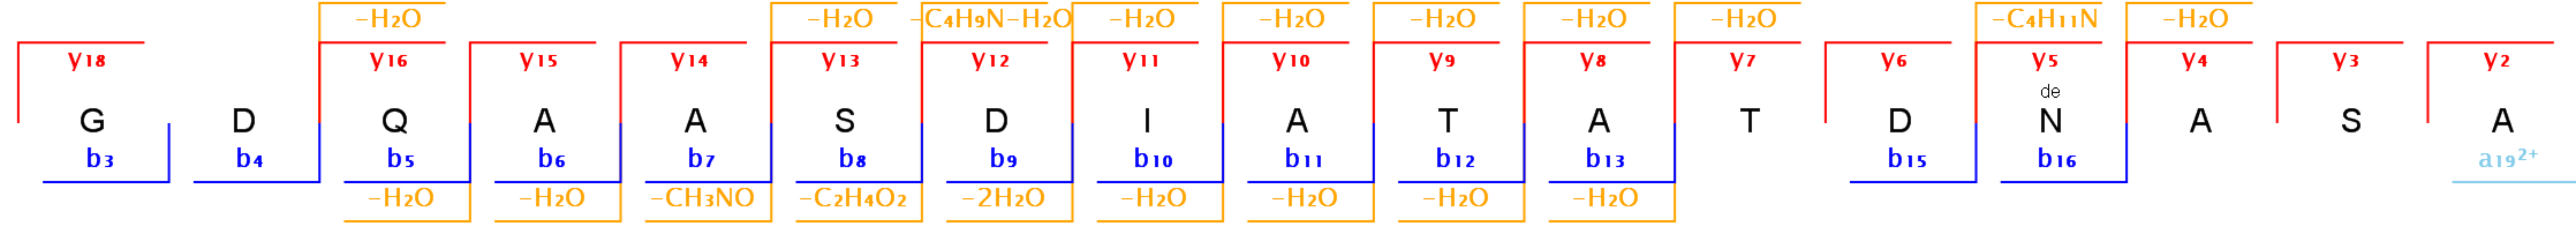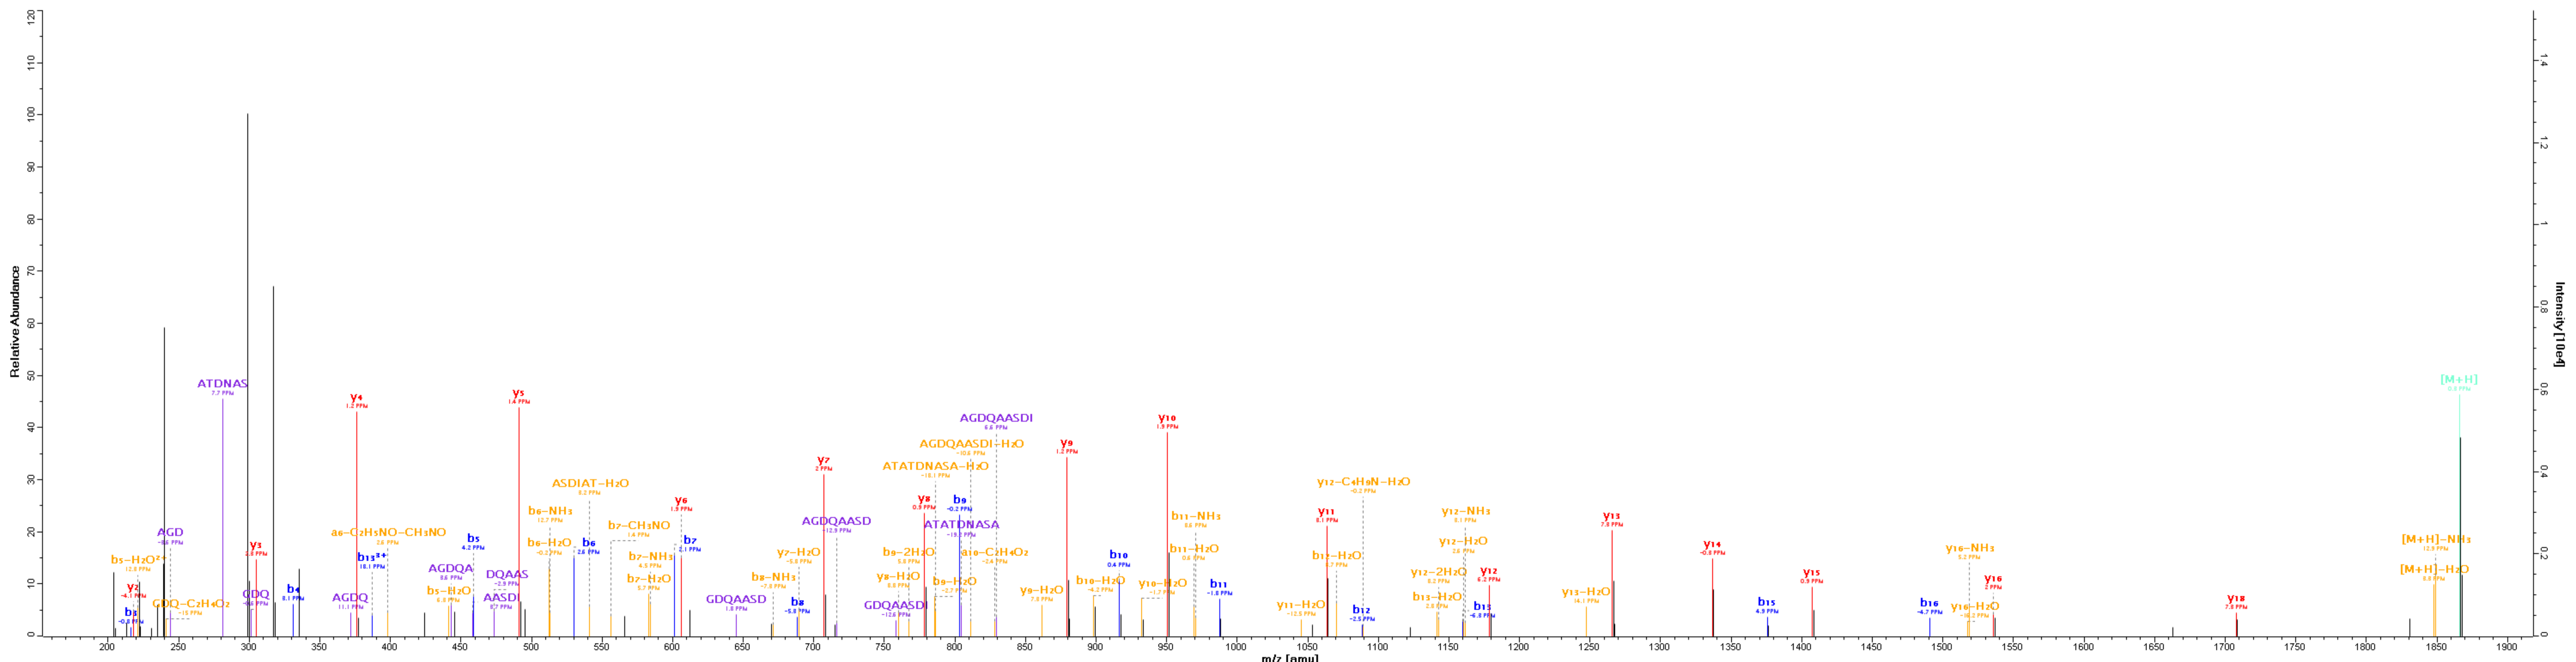





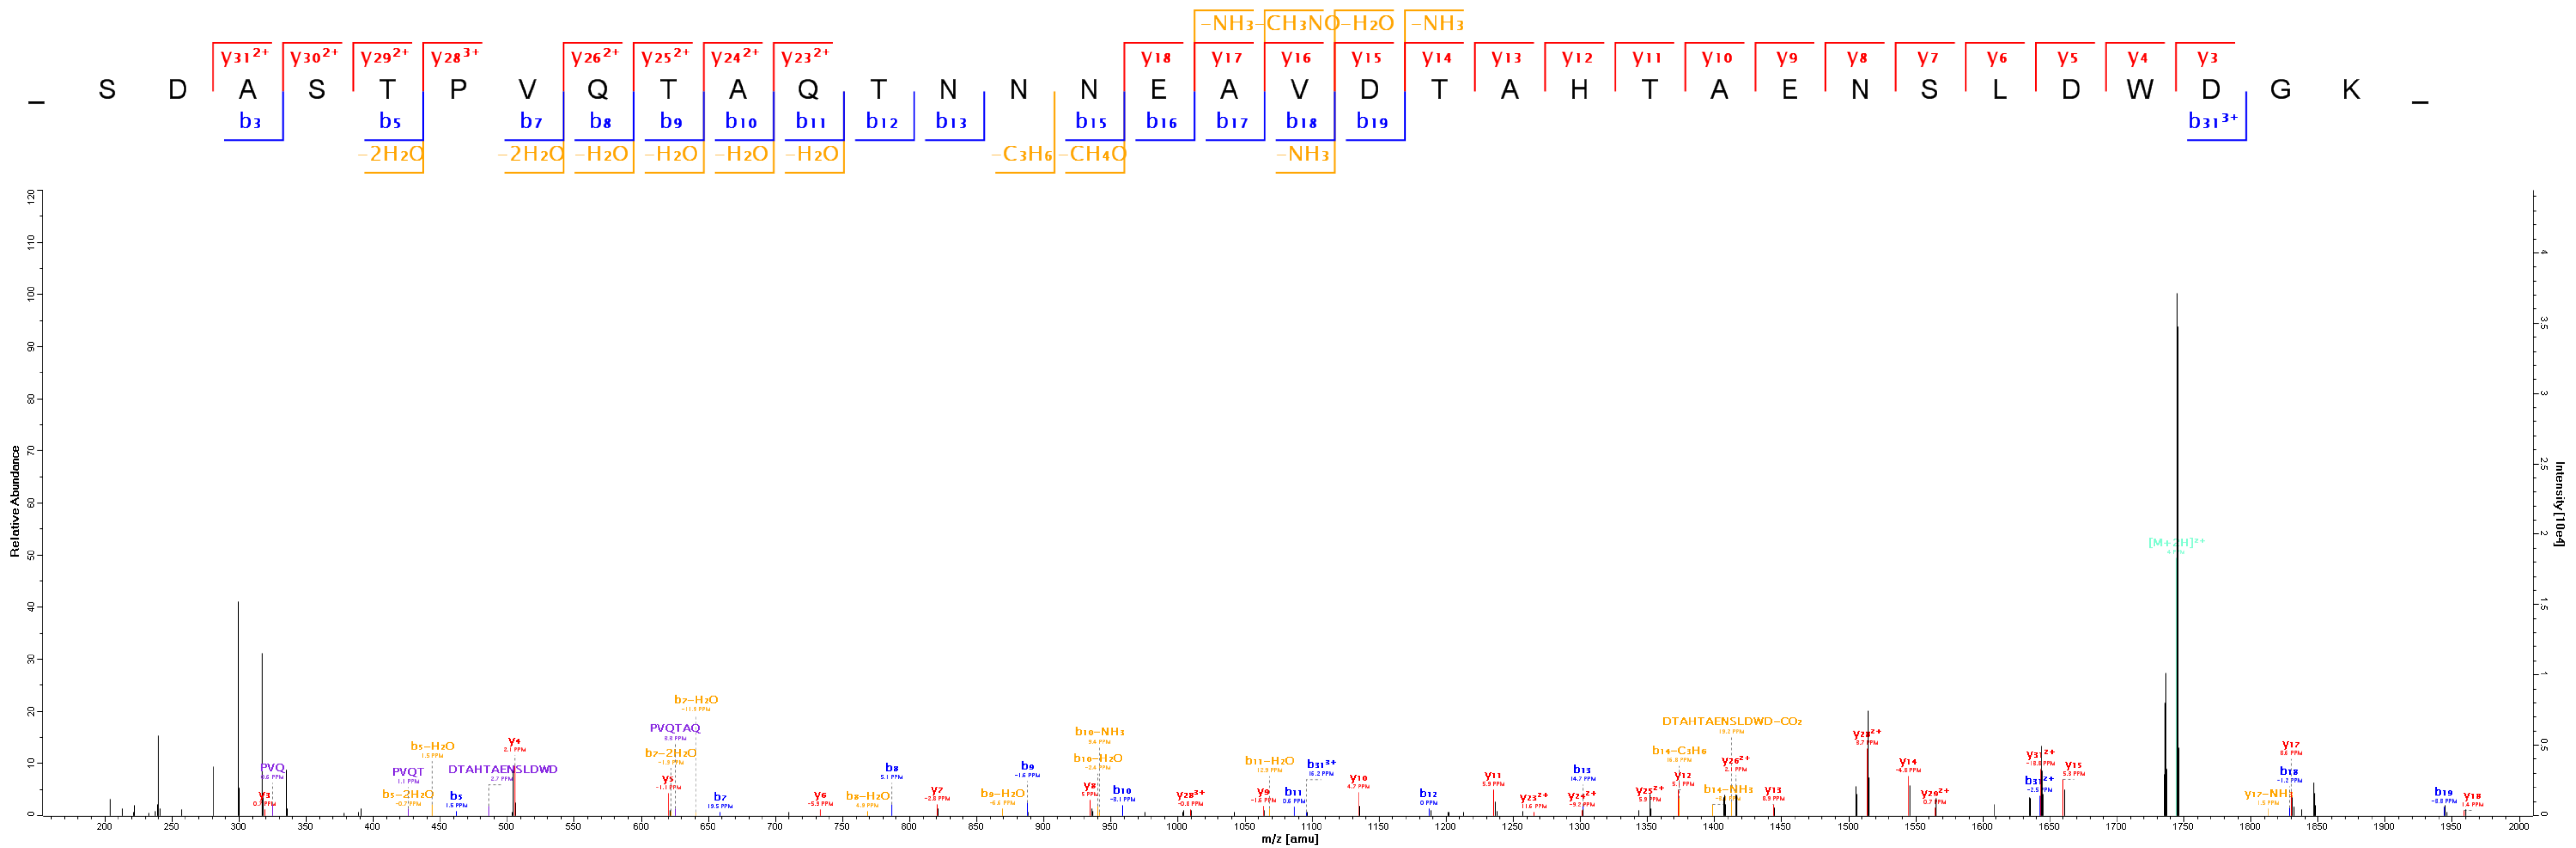

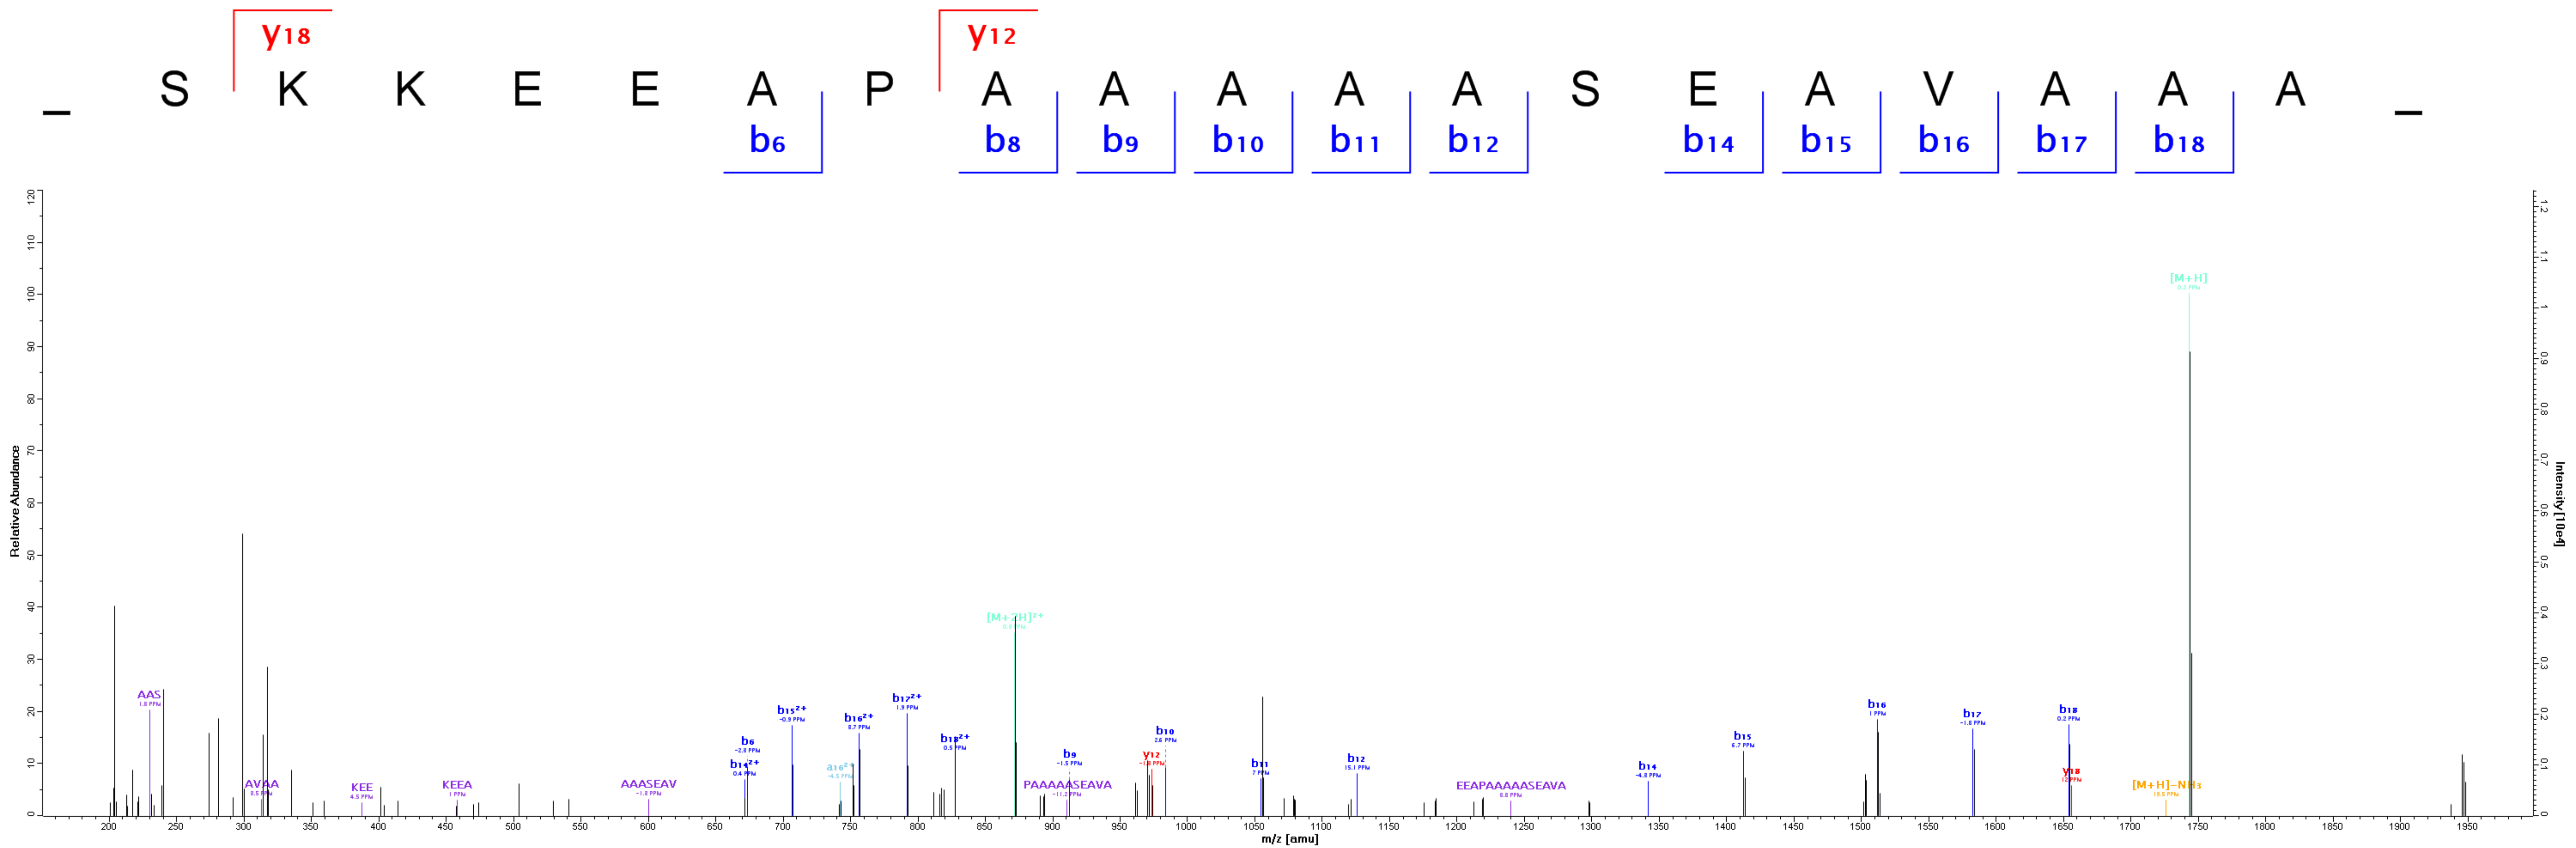



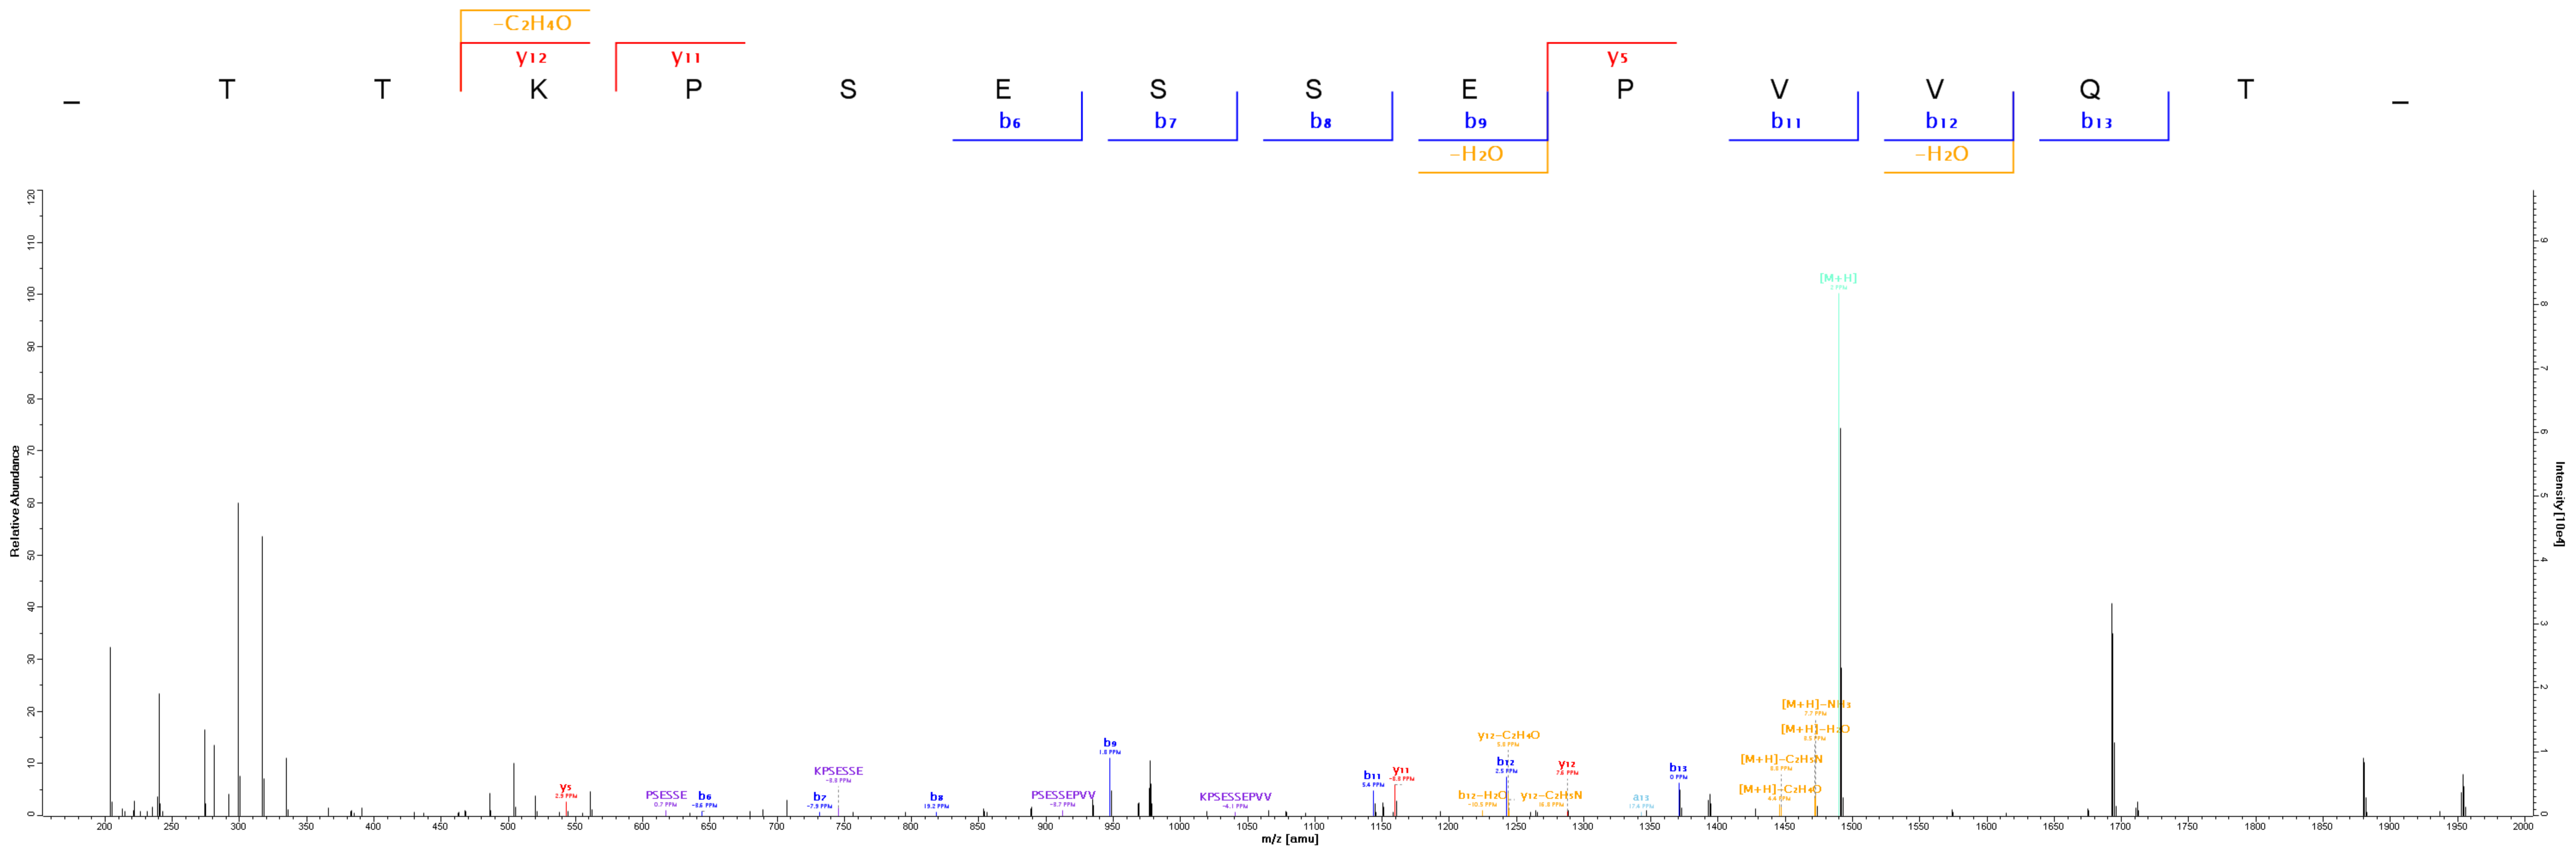



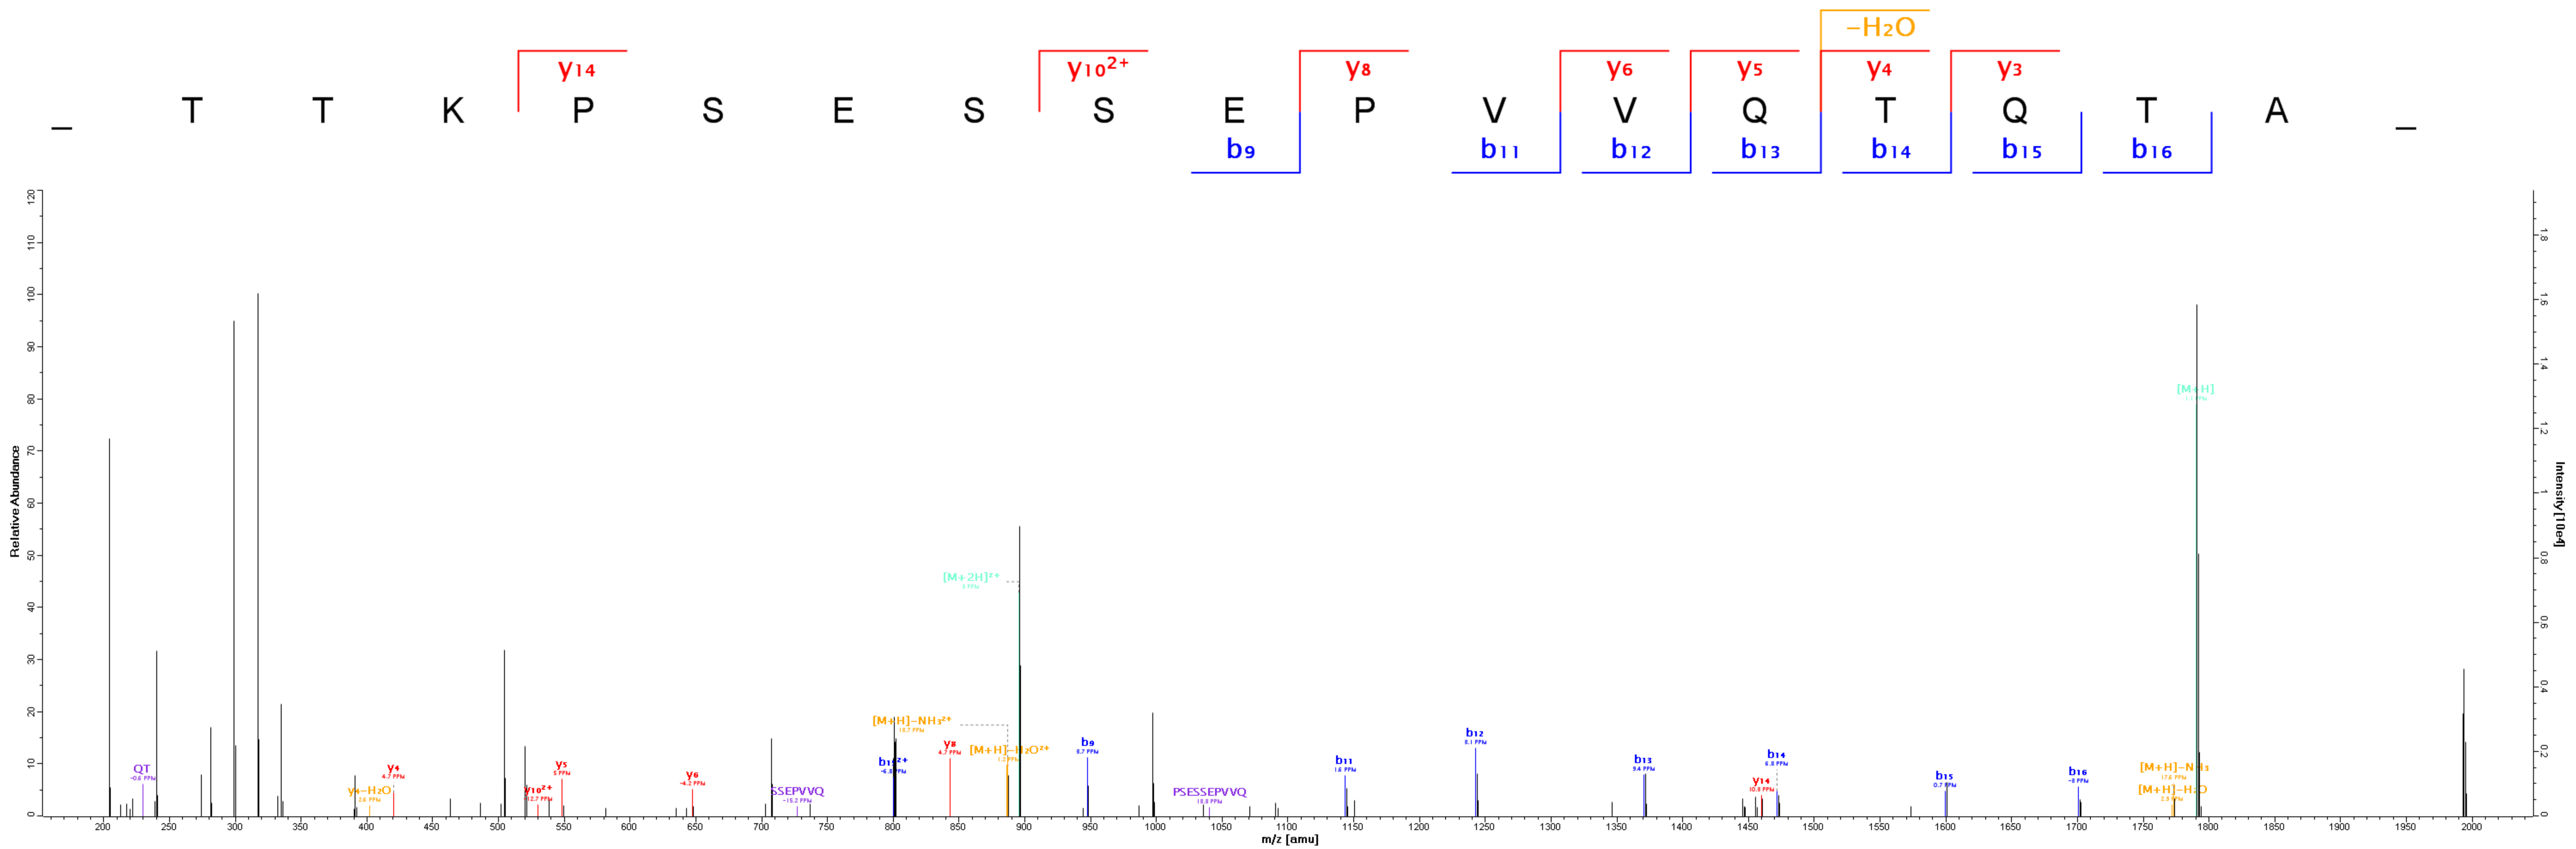

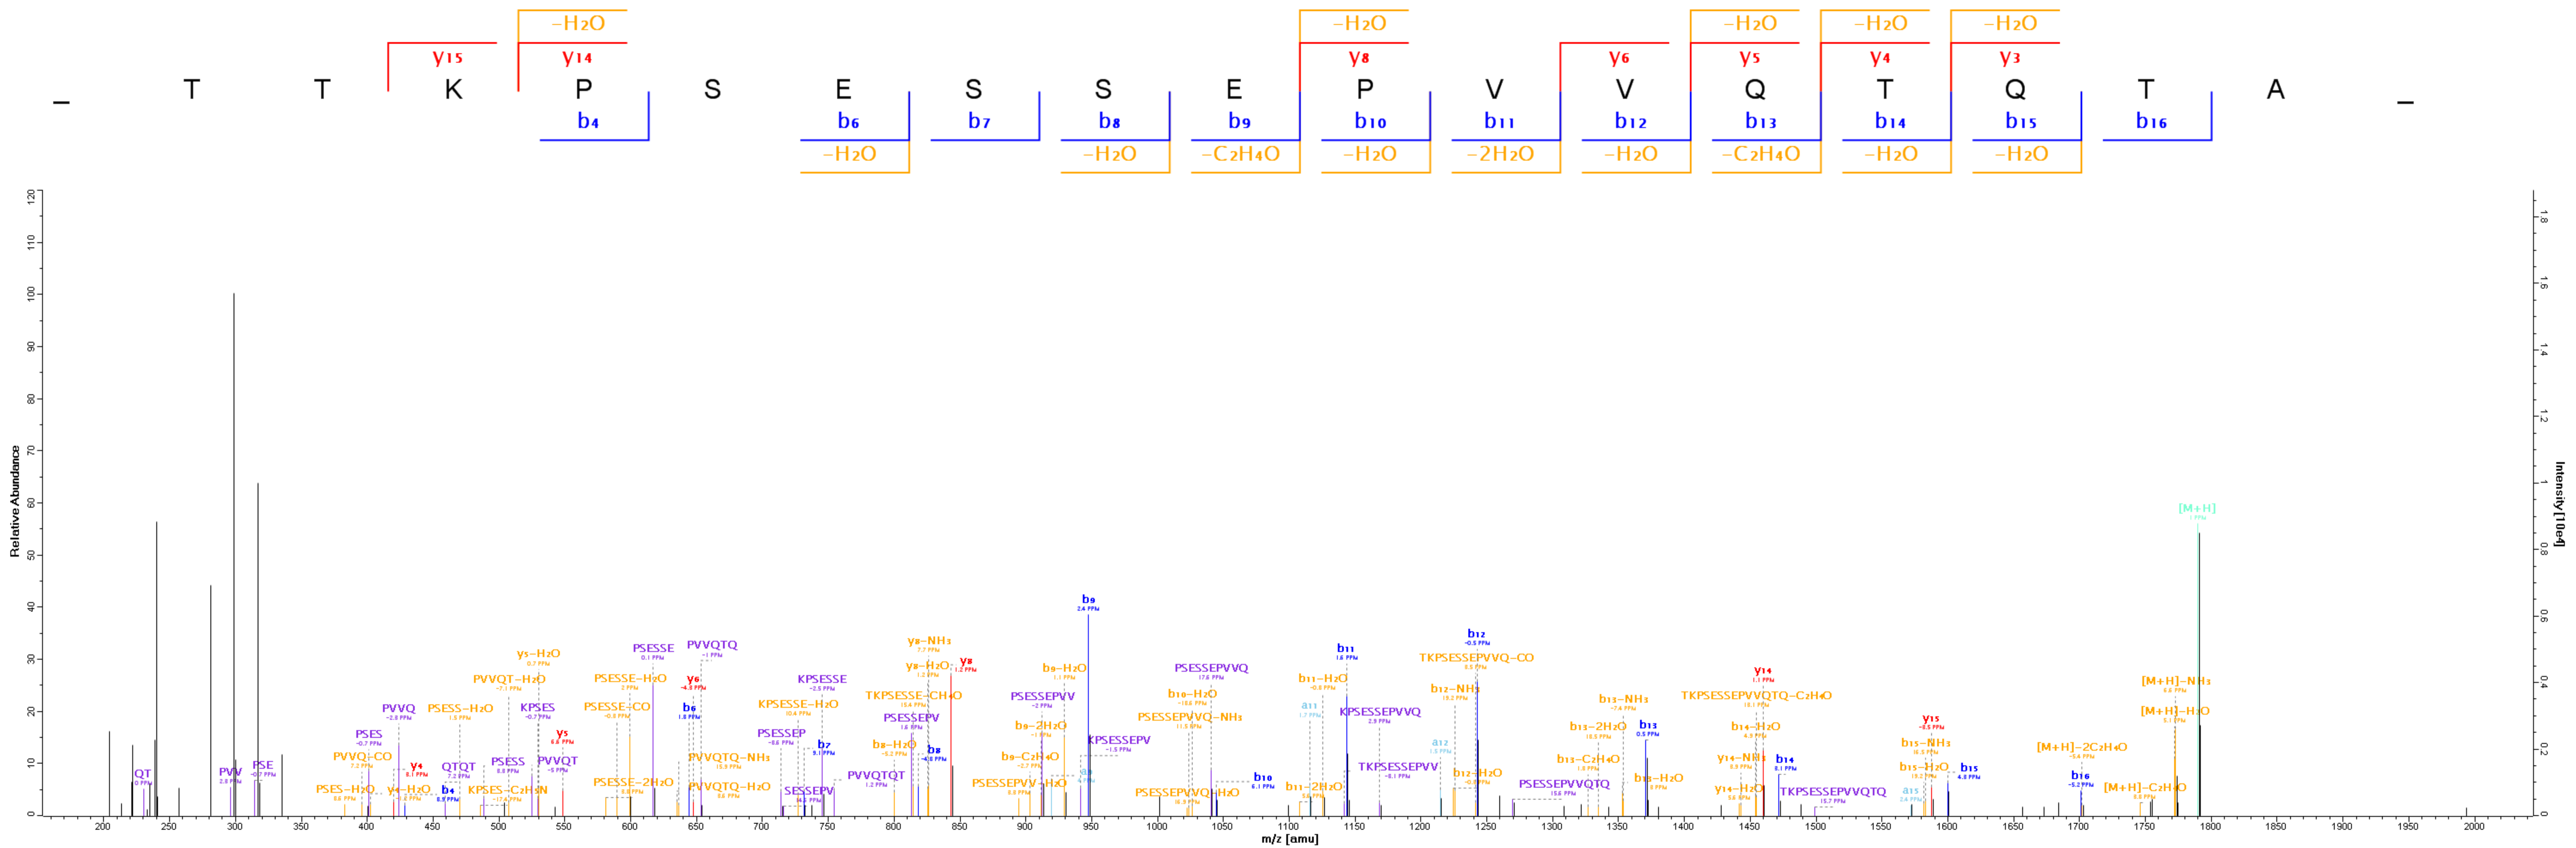





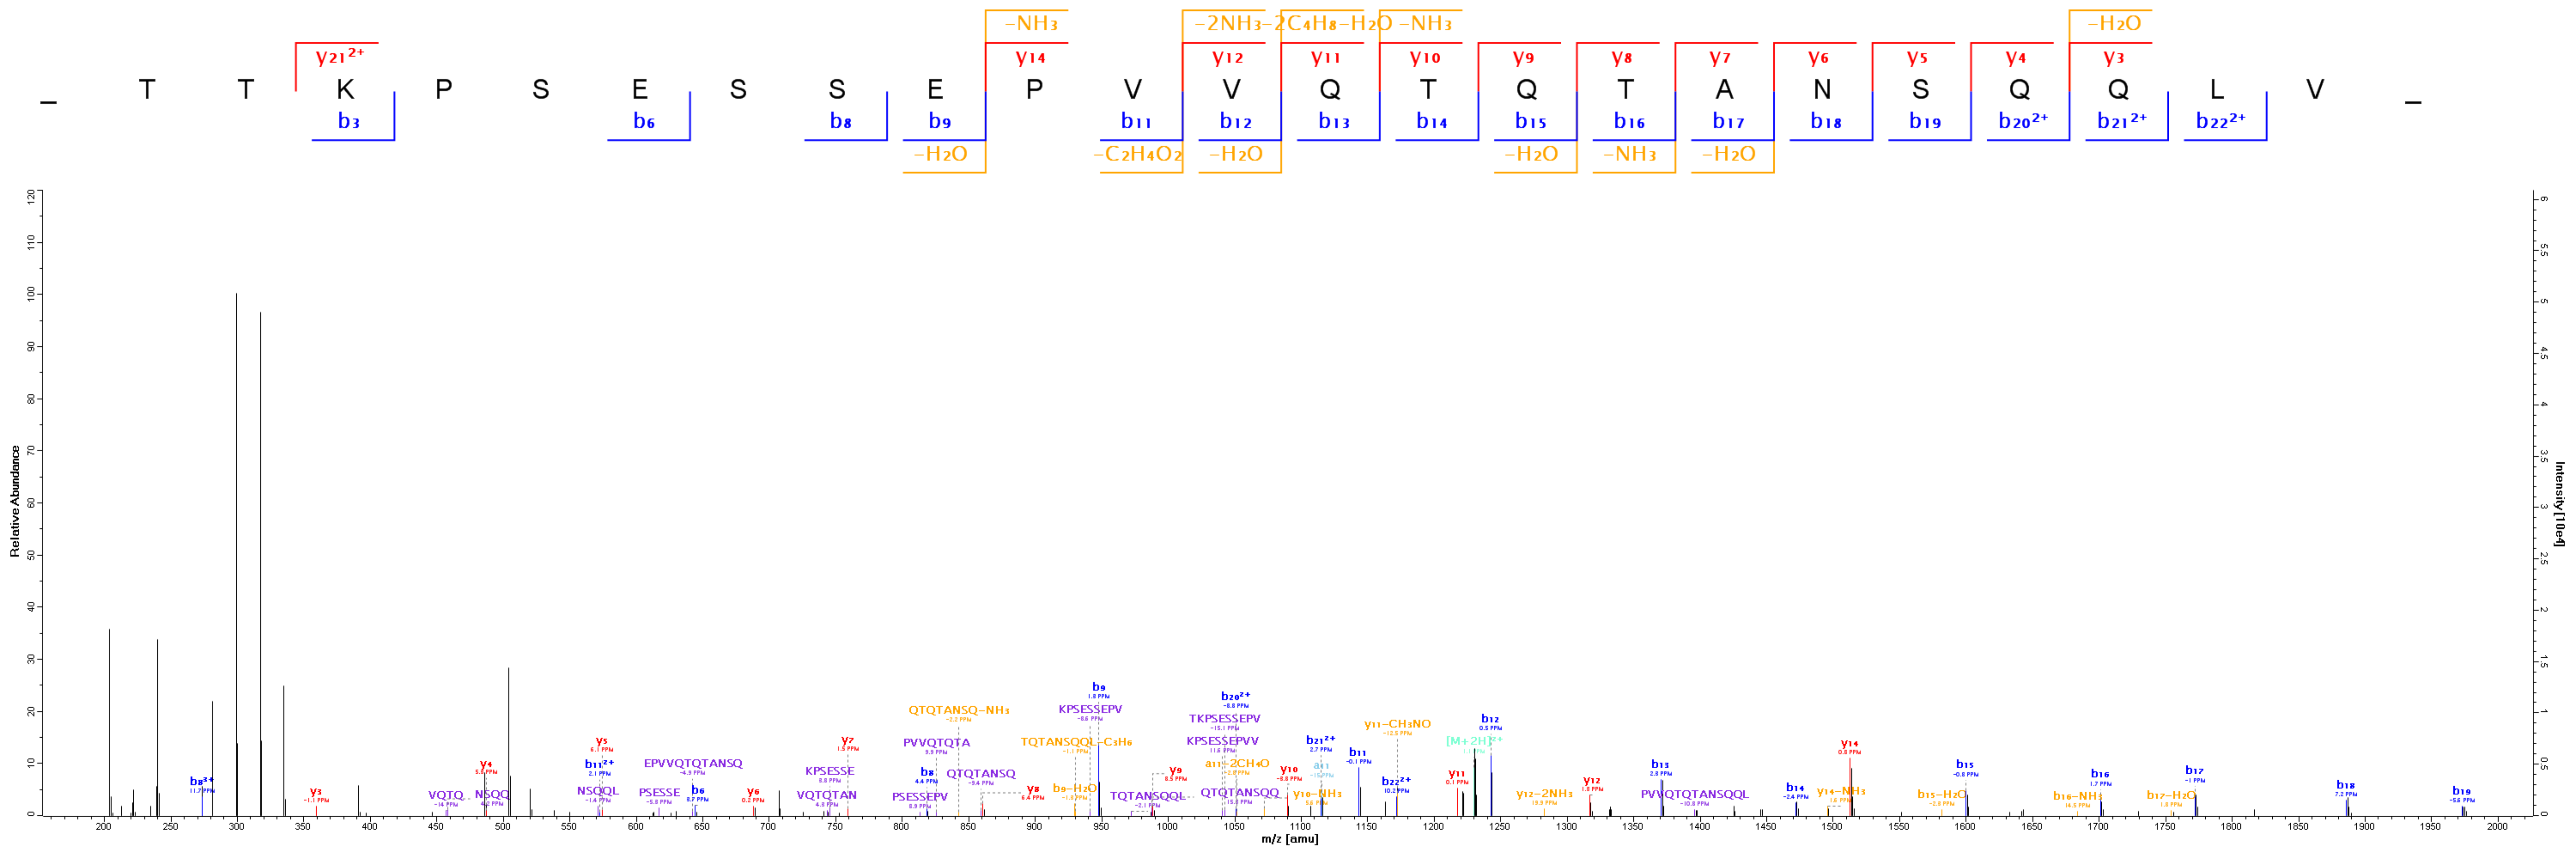

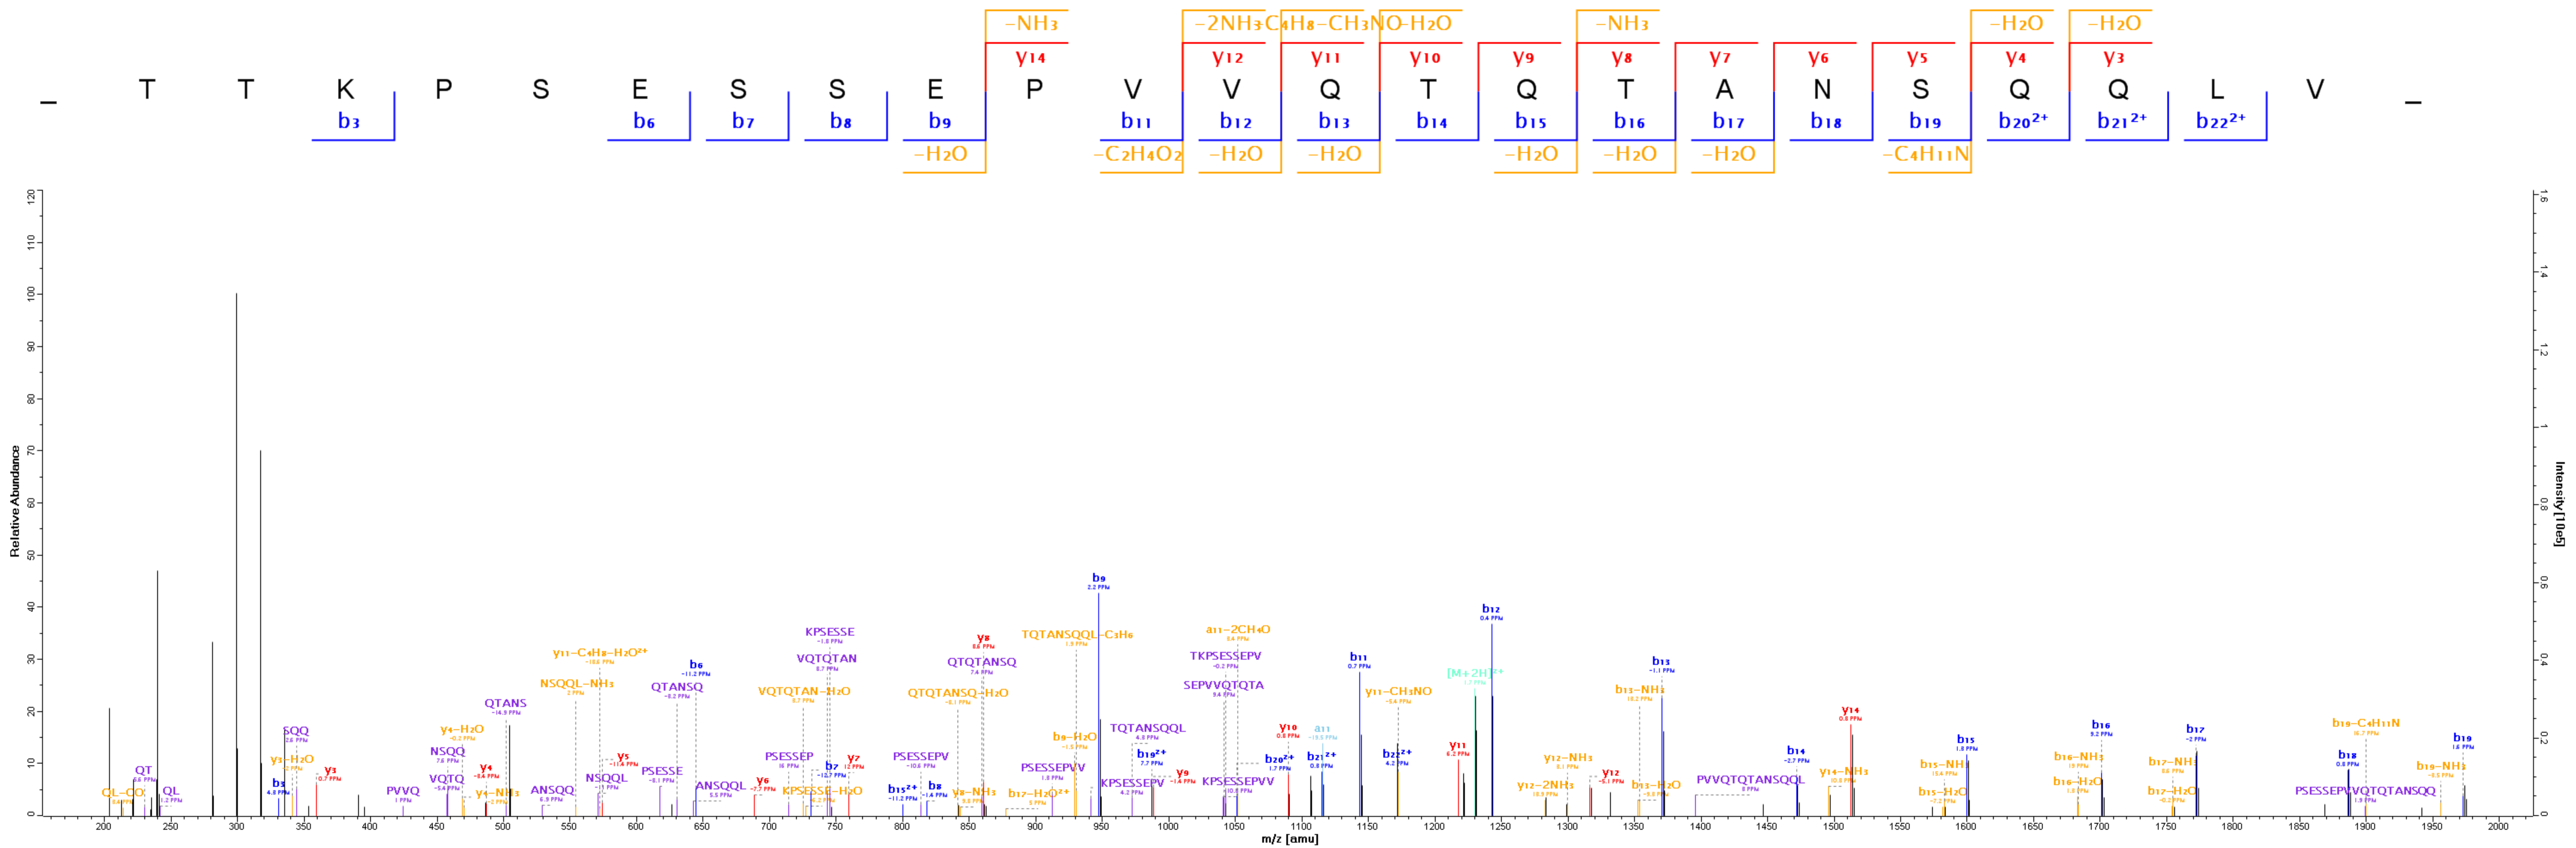

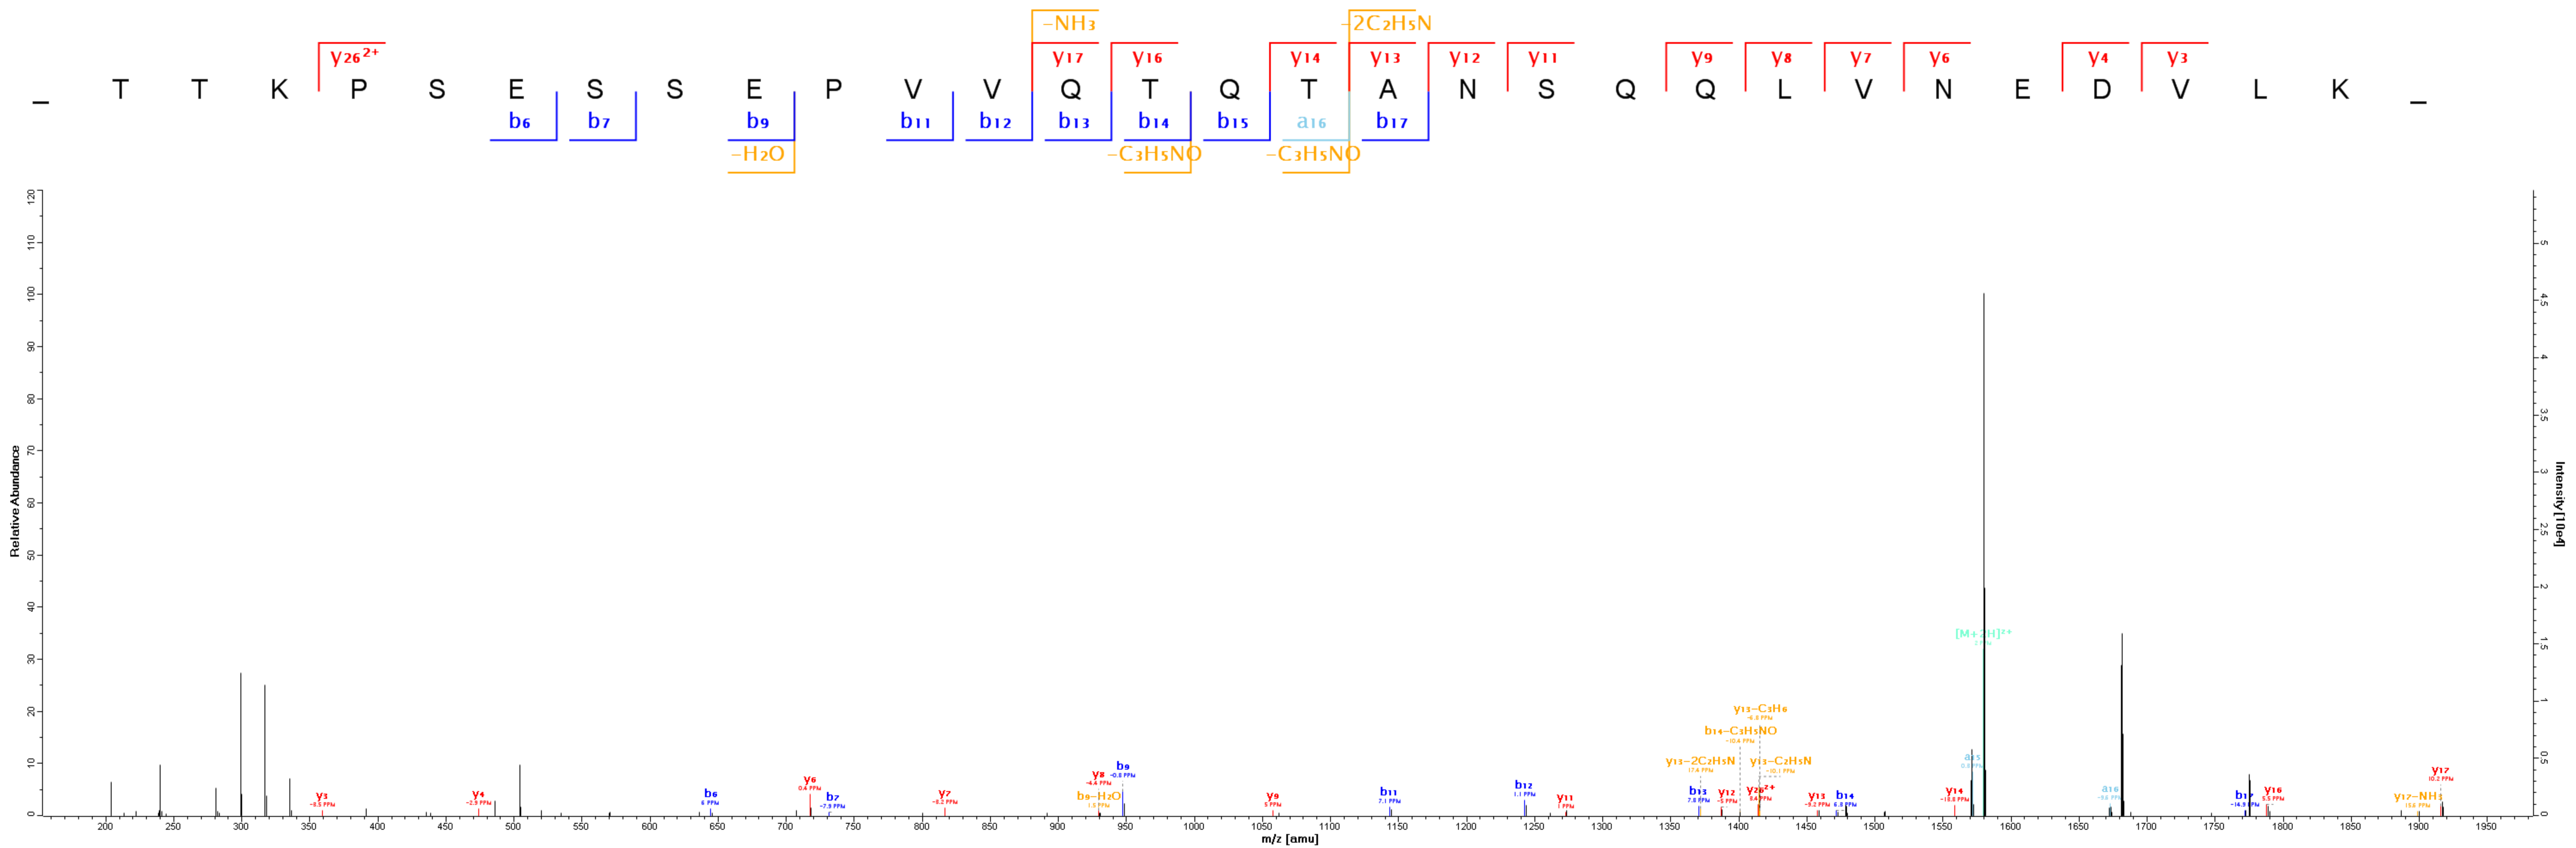

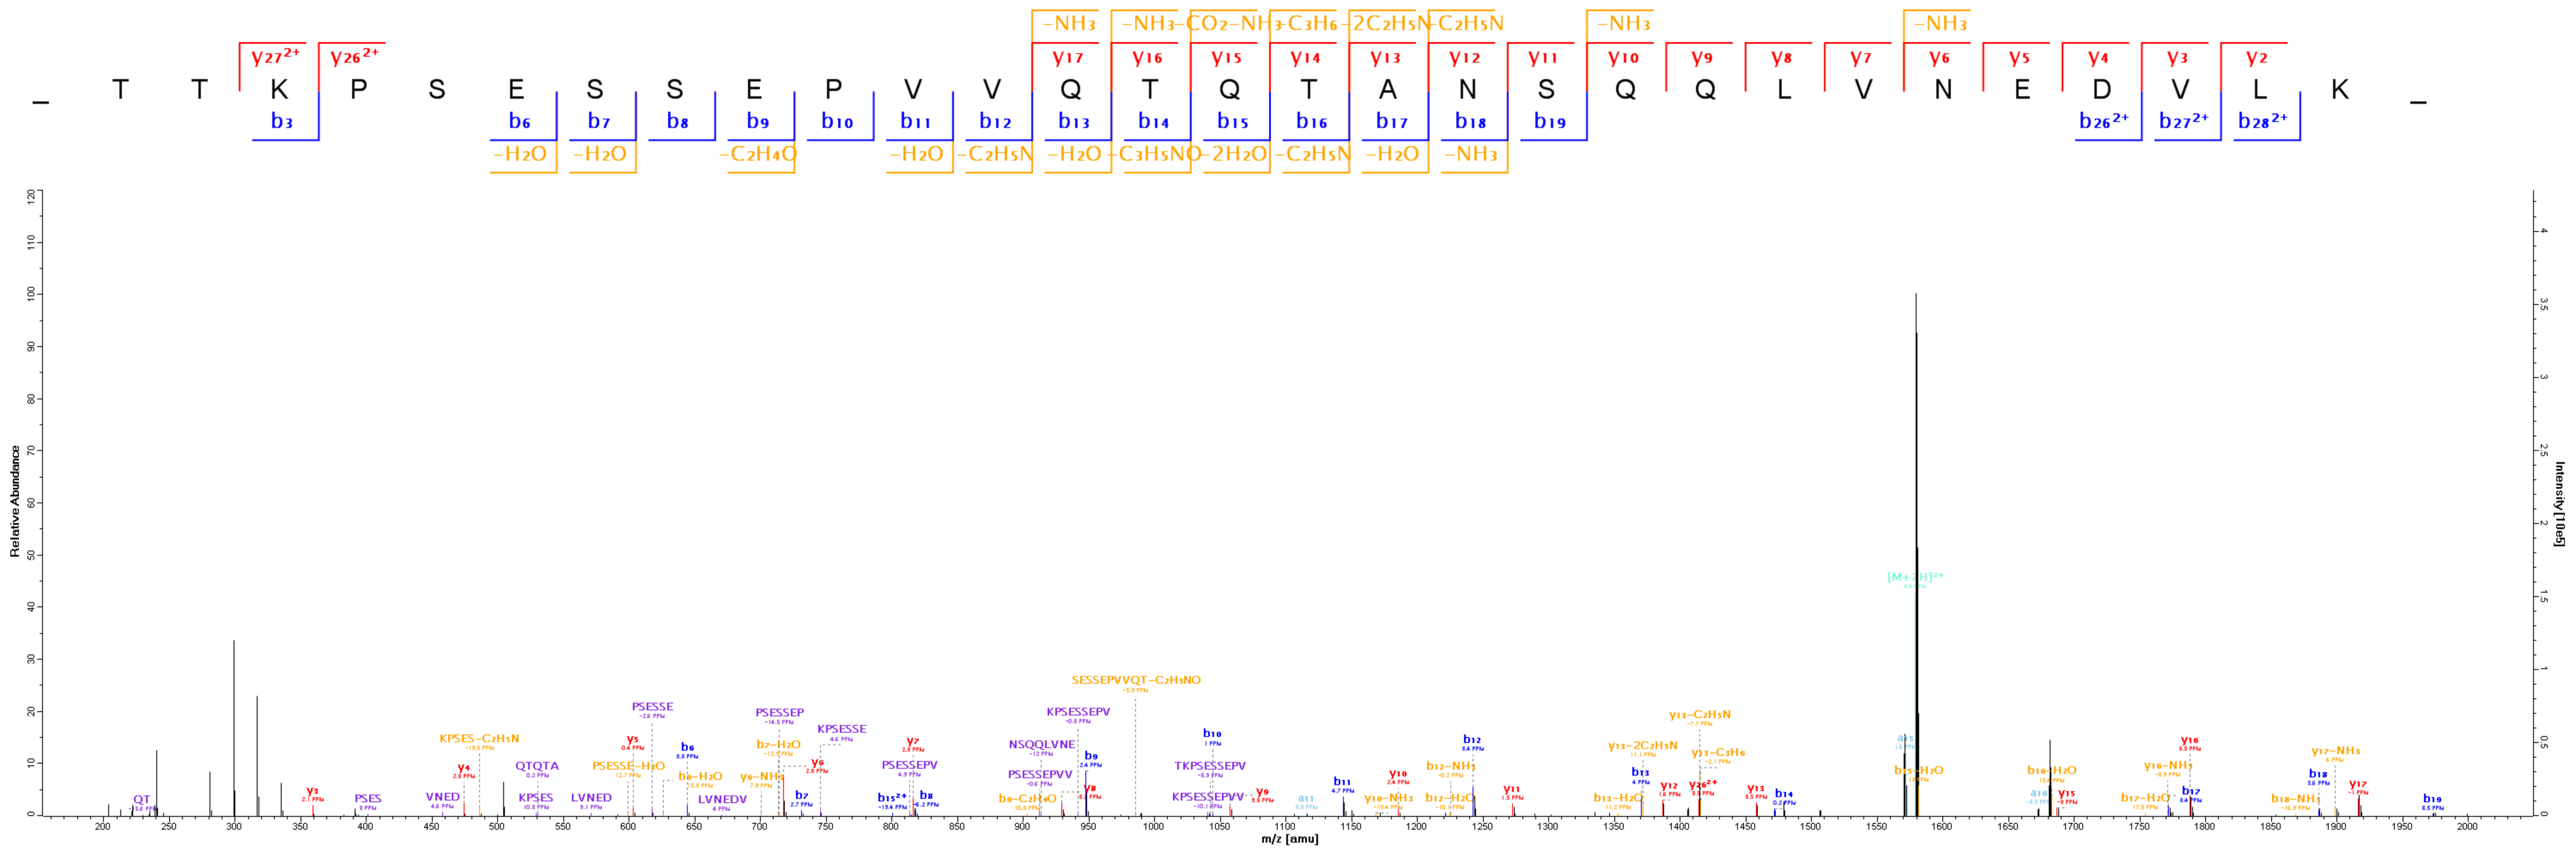



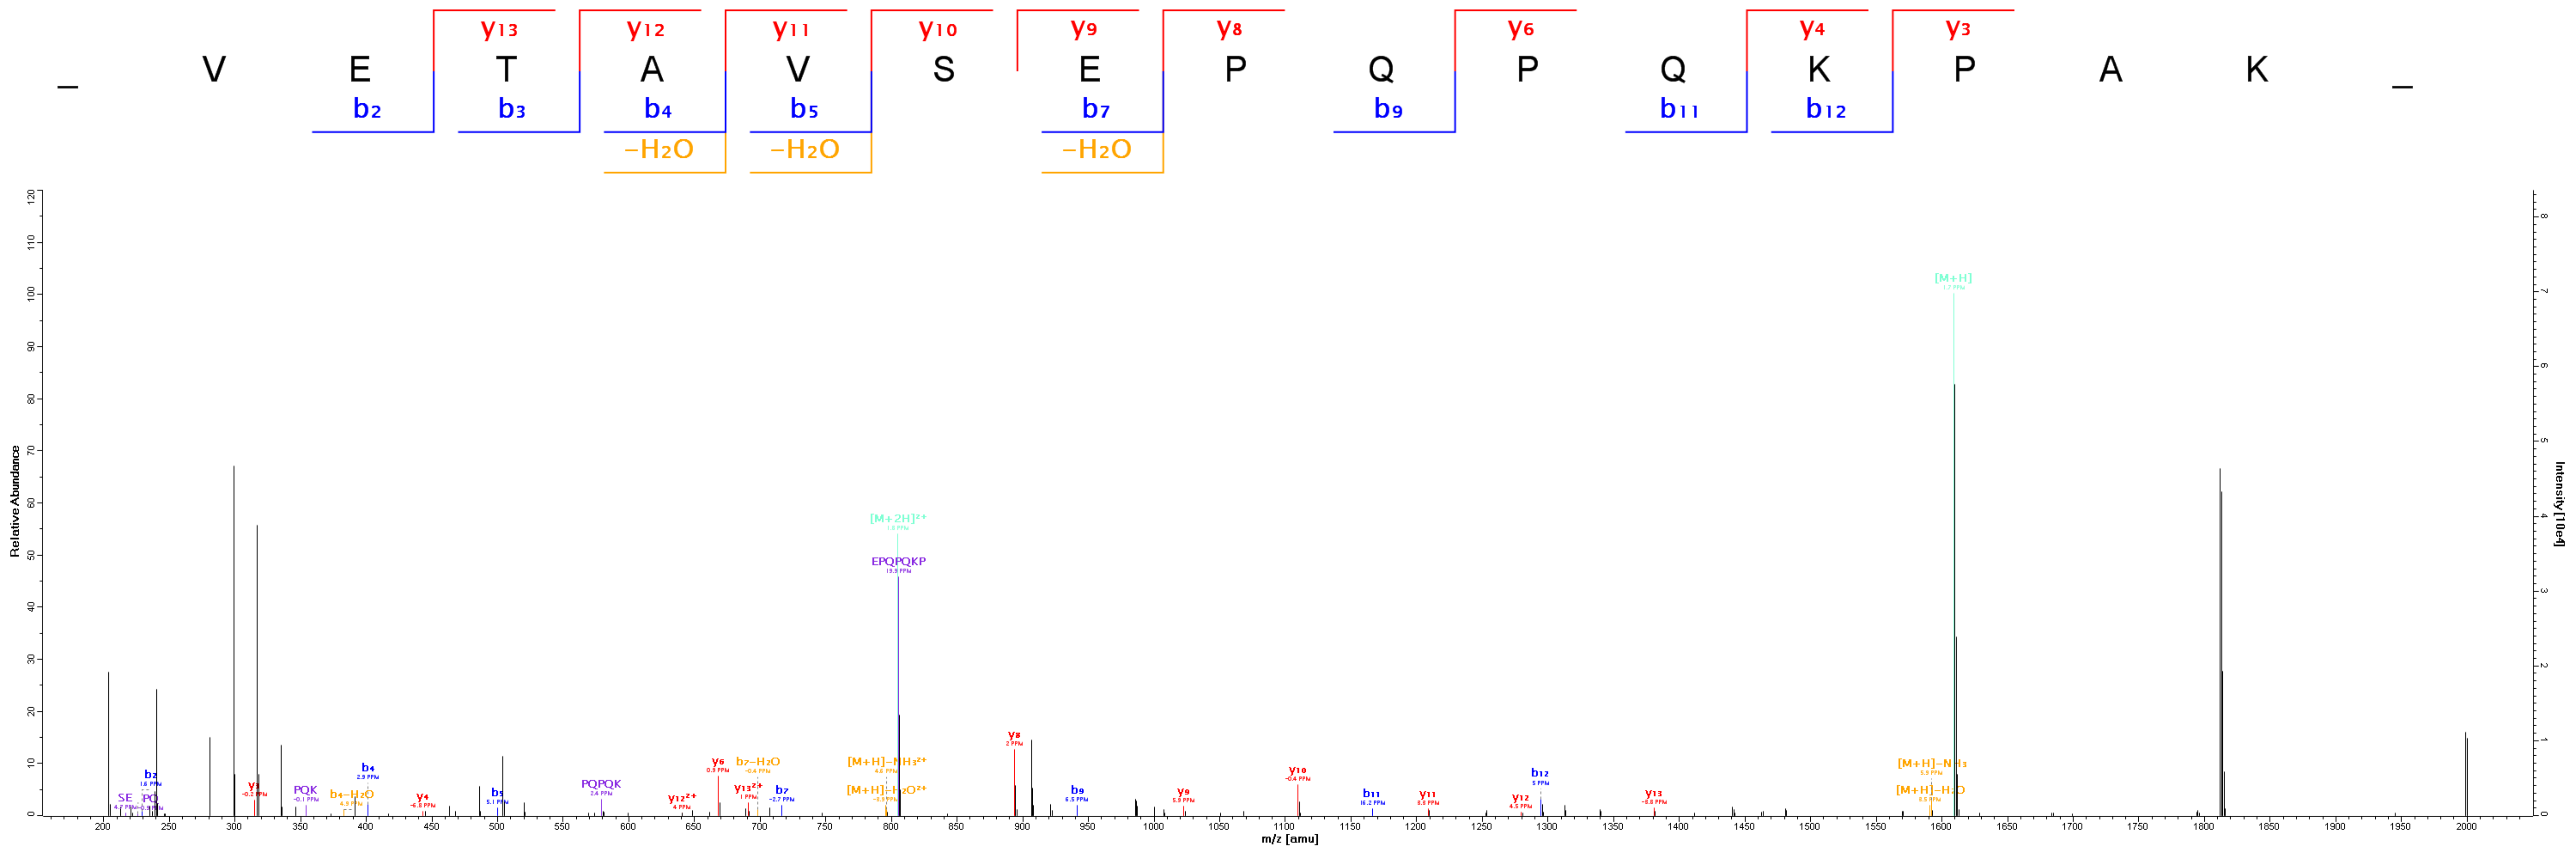

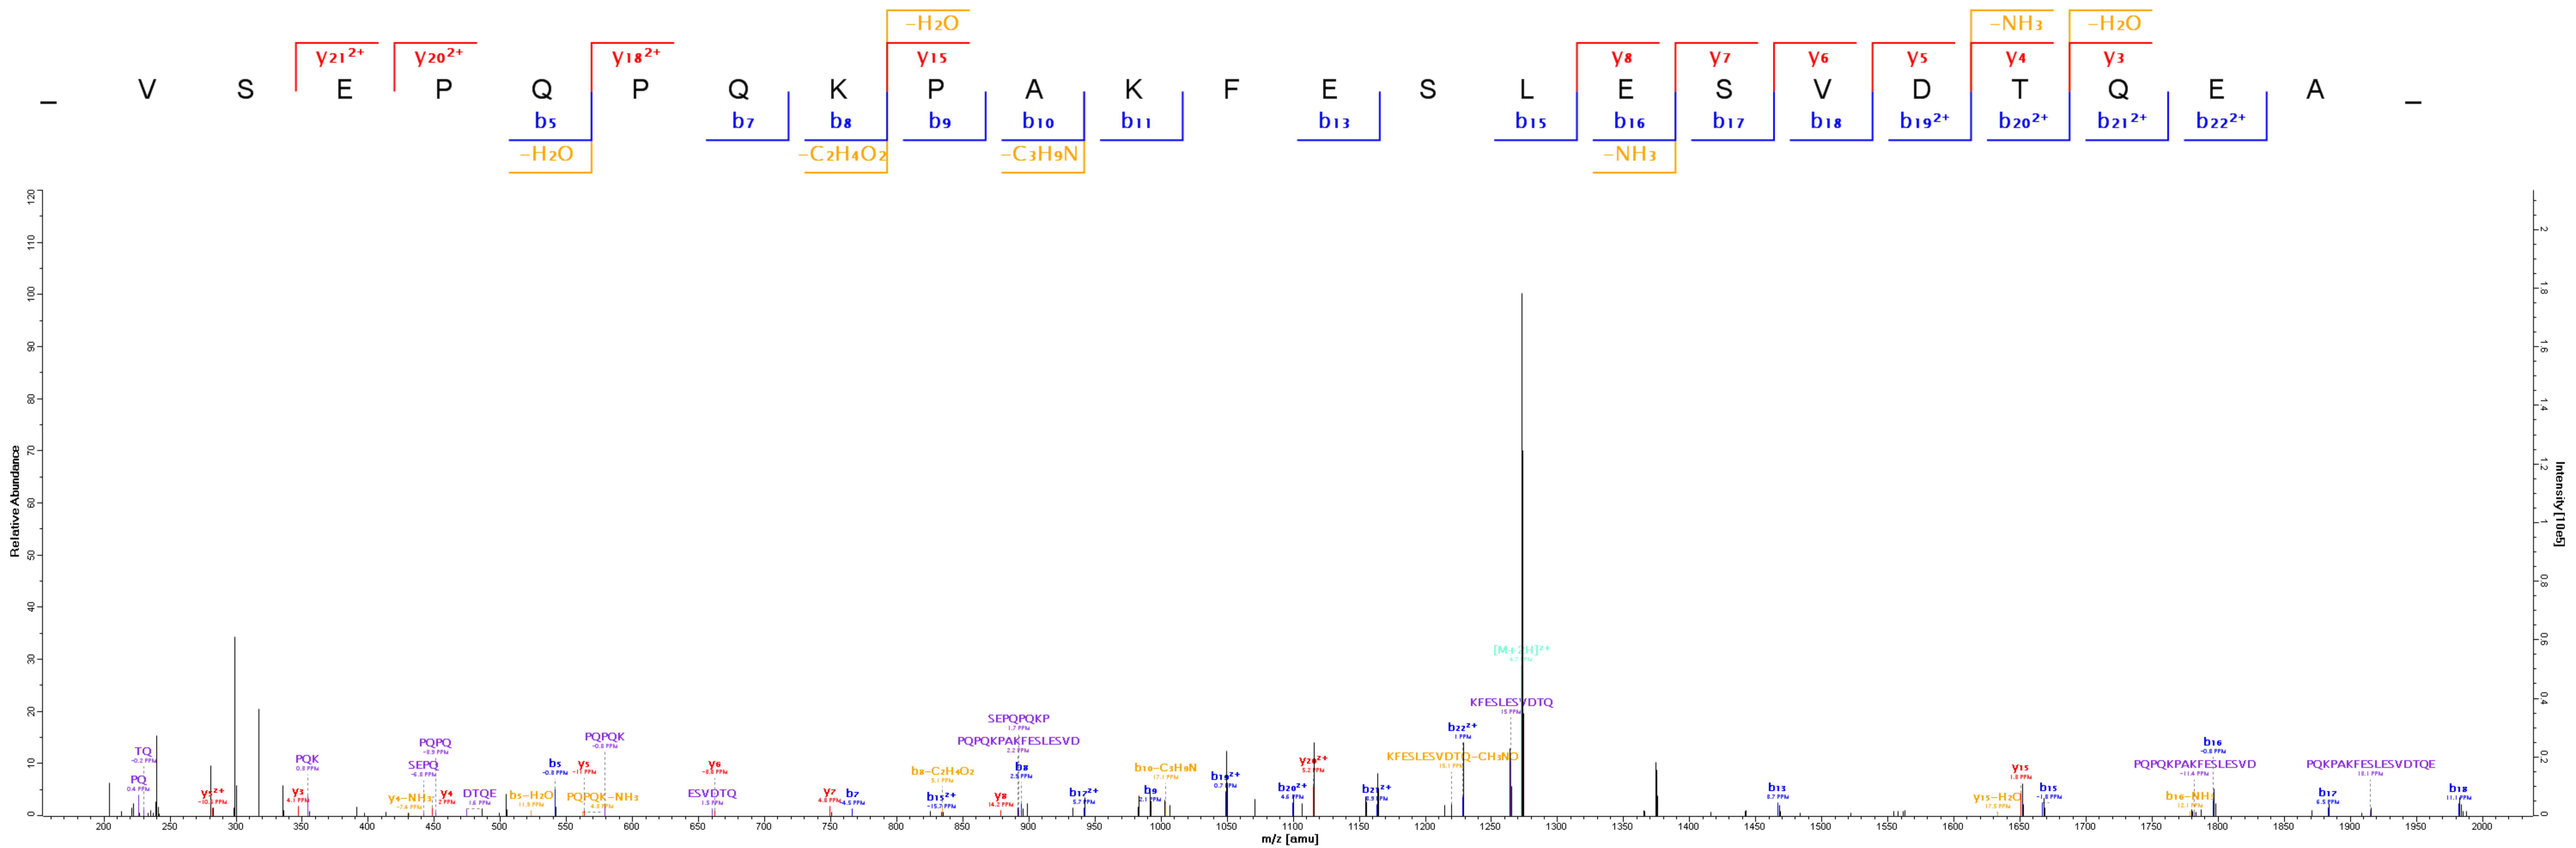

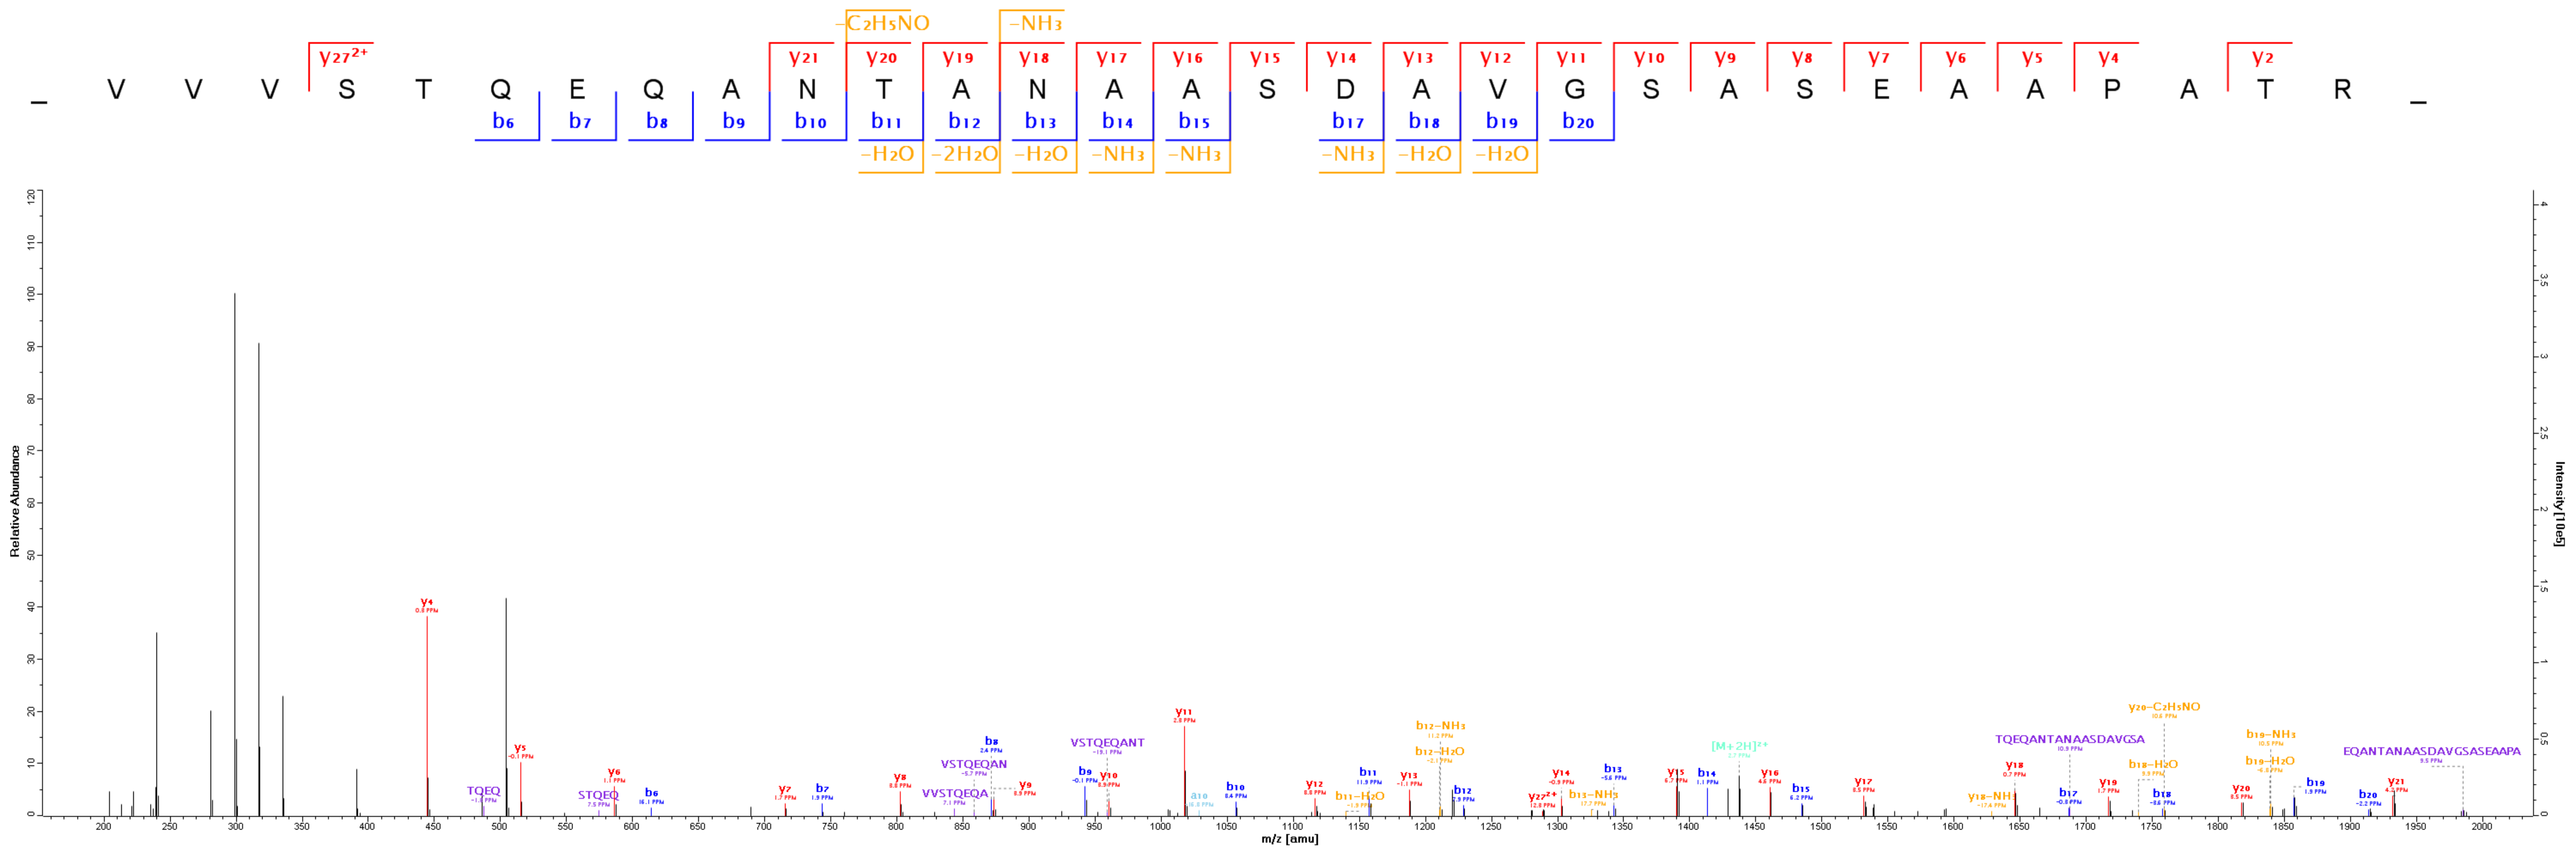

Supplement: supp_M114.038315_mcp.M114.038315-7.pdf [file supp_M114.038315_mcp.M114.038315-7.pdf]
