# Supplementary material
Source: PubMed Central journal article supplement (PMC4159654)

**Supplementary Table 7: HCD identified *Acinetobacter baumannii* (strain 1441 C3) glycopeptides**

| Uniprot accession number | Protein name                                                                                          | Precursor m/z [Da] | Precursor Charge | Precursor MH+ [Da] | glycan mass | glycan compositions           | peptide mass | peptide                                                        | mascot score | Page |
|--------------------------|-------------------------------------------------------------------------------------------------------|--------------------|------------------|--------------------|-------------|-------------------------------|--------------|----------------------------------------------------------------|--------------|------|
| A3M265_A<br>CIBT         | Uncharacterized protein [A1S_0556] [Acinetobacter baumannii (strain ATCC 17978 / NCDC KC 755)] 313 AA | 918.93             | 4                | 3672.70            | 706.29      | HexNAc-187-316                | 2966.4086    | <sup>108</sup> AAQADKKTEASAAATTEQQDSFDAQ<br>VQR <sup>135</sup> | 46           | 7    |
| A7FB17_A<br>CIBT         | Uncharacterized protein [A1S_3580] [Acinetobacter baumannii (strain ATCC 17978 / NCDC KC 755)]        | 982.11             | 3                | 2944.32            | 1412.58     | double glycan; HexNAc-187-316 | 1531.7347    | <sup>50</sup> AASDAVGSASEAAPATR <sup>66</sup>                  | 21           | 8    |
| A3M6D2_A<br>CIBT         | Uncharacterized protein [A1S_2049] [Acinetobacter baumannii (strain ATCC 17978 / NCDC KC 755)]        | 973.45             | 3                | 2918.35            | 1412.59     | double glycan; HexNAc-187-316 | 1505.7595    | <sup>184</sup> AASEPEQKVEYVR <sup>196</sup>                    | 20           | 9    |
| A3M3X9_A<br>CIBT         | OmpA/MotB [A1S_1193] [Acinetobacter baumannii (strain ATCC 17978 / NCDC KC 755)]                      | 1686.79            | 2                | 3372.57            | 1412.58     | double glycan; HexNAc-187-316 | 1959.9869    | <sup>129</sup> AASGVEAAAAPATLTLSTDDK <sup>149</sup>            | 77           | 10   |
| A3M3X9_A<br>CIBT         | OmpA/MotB [A1S_1193] [Acinetobacter baumannii (strain ATCC 17978 / NCDC KC 755)]                      | 1360.29            | 3                | 4078.87            | 2118.88     | triple glycan; HexNAc-187-316 | 1959.9869    | <sup>129</sup> AASGVEAAAAPATLTLSTDDK <sup>149</sup>            | 41           | 11   |
| A3M796_A<br>CIBT         | Uncharacterized protein [A1S_2371] [Acinetobacter baumannii (strain ATCC 17978 / NCDC KC 755)]        | 1665.26            | 2                | 3329.51            | 1412.59     | double glycan; HexNAc-187-316 | 1916.9196    | <sup>82</sup> AEDQNADSGIAASTPVATAK <sup>101</sup>              | 78           | 12   |
| A3M265_A<br>CIBT         | Uncharacterized protein [A1S_0556] [Acinetobacter baumannii (strain ATCC 17978 / NCDC KC 755)]        | 1191.58            | 2                | 2382.16            | 1412.58     | double glycan; HexNAc-187-316 | 969.5728     | <sup>301</sup> AKPASTPAVK <sup>310</sup>                       | 48           | 13   |
| A3M265_A<br>CIBT         | Uncharacterized protein [A1S_0556] [Acinetobacter baumannii (strain ATCC 17978 / NCDC KC 755)]        | 1030.15            | 3                | 3088.45            | 2118.88     | triple glycan; HexNAc-187-316 | 969.5728     | <sup>301</sup> AKPASTPAVK <sup>310</sup>                       | 28           | 14   |

|                  |                                                                                                           |         |   |         |         |                                      |           |                                                                              |     |    |
|------------------|-----------------------------------------------------------------------------------------------------------|---------|---|---------|---------|--------------------------------------|-----------|------------------------------------------------------------------------------|-----|----|
| A7FB95_A<br>CIBT | Uncharacterized protein<br>[A1S_3658] [Acinetobacter<br>baumannii (strain ATCC 17978<br>/ NCDC KC 755)]   | 850.35  | 3 | 2549.03 | 706.29  | HexNAc-187-<br>316                   | 1842.7381 | <sup>20</sup> DGMHEASDPATSHDMNK <sup>36</sup>                                | 78  | 15 |
| A7FBI1_A<br>CIBT | Uncharacterized protein<br>[A1S_3744] [Acinetobacter<br>baumannii (strain ATCC 17978<br>/ NCDC KC 755)]   | 769.12  | 4 | 3073.46 | 706.29  | HexNAc-187-<br>316                   | 2367.1674 | <sup>29</sup> EEEQDKVETAVSEPPQKPAK <sup>49</sup>                             | 34  | 16 |
| A7FB17_A<br>CIBT | Uncharacterized protein<br>[A1S_3580] [Acinetobacter<br>baumannii (strain ATCC 17978<br>/ NCDC KC 755)]   | 989.45  | 3 | 2966.33 | 706.29  | HexNAc-187-<br>316                   | 2260.0436 | <sup>43</sup> EQANTANAASDAVGSASEAAPATR <sup>66</sup>                         | 104 | 17 |
| F0QPJ4_A<br>CIBD | Uncharacterized protein<br>[ABTW07_0637]<br>[Acinetobacter baumannii<br>(strain TCDC-AB0715)]             | 1349.59 | 3 | 4046.76 | 2118.87 | triple glycan;<br>HexNAc-187-<br>316 | 1927.8992 | <sup>60</sup> ETAAAASDVAAAASDVAASAAH <sup>81</sup>                           | 62  | 18 |
| A7FBI1_A<br>CIBT | Uncharacterized protein<br>[A1S_3744] [Acinetobacter<br>baumannii (strain ATCC 17978<br>/ NCDC KC 755)]   | 808.88  | 4 | 3232.51 | 706.29  | HexNAc-187-<br>316                   | 2526.2206 | <sup>25</sup> ETPKEEQDKVETAVSEPPQK <sup>46</sup>                             | 41  | 19 |
| A7FB63_A<br>CIBT | Uncharacterized protein<br>[A1S_3626] [Acinetobacter<br>baumannii (strain ATCC 17978<br>/ NCDC KC 755)]   | 1040.46 | 3 | 3119.37 | 1412.58 | double glycan;<br>HexNAc-187-<br>316 | 1706.7828 | <sup>50</sup> GDQAASDIATATDNASAK <sup>67</sup>                               | 79  | 20 |
| A3M9I2_A<br>CIBT | Putative membrane protein<br>[A1S_3179] [Acinetobacter<br>baumannii (strain ATCC 17978<br>/ NCDC KC 755)] | 1212.09 | 4 | 4845.33 | 706.29  | HexNAc-187-<br>316                   | 4139.0422 | <sup>48</sup> IIQQQQAQASKPQINSQAASSVTPQT<br>QVANDMADGESIR <sup>86</sup>      | 56  | 21 |
| A3M9I2_A<br>CIBT | Putative membrane protein<br>[A1S_3179] [Acinetobacter<br>baumannii (strain ATCC 17978<br>/ NCDC KC 755)] | 1216.09 | 4 | 4861.33 | 706.30  | HexNAc-187-<br>316                   | 4155.0371 | <sup>48</sup> IIQQQQAQASKPQINSQAASSVTPQT<br>QVANDM(+16)ADGESIR <sup>86</sup> | 33  | 22 |
| A3M6D2_A<br>CIBT | Uncharacterized protein<br>[A1S_2049] [Acinetobacter<br>baumannii (strain ATCC 17978<br>/ NCDC KC 755)]   | 695.66  | 3 | 2084.98 | 706.29  | HexNAc-187-<br>316                   | 1378.6849 | <sup>159</sup> KAASEPEQKVEY <sup>170</sup>                                   | 24  | 23 |
| A7FB63_A<br>CIBT | Uncharacterized protein<br>[A1S_3626] [Acinetobacter<br>baumannii (strain ATCC 17978<br>/ NCDC KC 755)]   | 900.07  | 3 | 2698.20 | 706.25  | HexNAc-187-<br>316                   | 1992.9469 | <sup>47</sup> KSAGDQAASDIATATDNASAK <sup>67</sup>                            | 115 | 24 |

|                  |                                                                                                         |         |   |         |         |                                      |           |                                                      |     |    |
|------------------|---------------------------------------------------------------------------------------------------------|---------|---|---------|---------|--------------------------------------|-----------|------------------------------------------------------|-----|----|
| A3M265_A<br>CIBT | Uncharacterized protein<br>[A1S_0556] [Acinetobacter<br>baumannii (strain ATCC 17978<br>/ NCDC KC 755)] | 924.77  | 3 | 2772.28 | 390.17  | HexNAc-187                           | 2382.1168 | <sup>114</sup> KTEASAAATTEQQDSFDAQVQR <sup>135</sup> | 113 | 25 |
| A7FB17_A<br>CIBT | Uncharacterized protein<br>[A1S_3580] [Acinetobacter<br>baumannii (strain ATCC 17978<br>/ NCDC KC 755)] | 1020.12 | 3 | 3058.36 | 1412.58 | double glycan;<br>HexNAc-187-<br>316 | 1645.7776 | <sup>49</sup> NAASDAVGSASEAAPATR <sup>66</sup>       | 55  | 26 |
| A7FB95_A<br>CIBT | Uncharacterized protein<br>[A1S_3658] [Acinetobacter<br>baumannii (strain ATCC 17978<br>/ NCDC KC 755)] | 725.63  | 3 | 2174.87 | 706.29  | HexNAc-187-<br>316                   | 1468.5758 | <sup>19</sup> NDGMHEASDPATSH <sup>32</sup>           | 74  | 27 |
| A7FB95_A<br>CIBT | Uncharacterized protein<br>[A1S_3658] [Acinetobacter<br>baumannii (strain ATCC 17978<br>/ NCDC KC 755)] | 763.97  | 3 | 2289.89 | 706.29  | HexNAc-187-<br>316                   | 1583.6027 | <sup>19</sup> NDGMHEASDPATSHD <sup>33</sup>          | 53  | 28 |
| A7FB95_A<br>CIBT | Uncharacterized protein<br>[A1S_3658] [Acinetobacter<br>baumannii (strain ATCC 17978<br>/ NCDC KC 755)] | 807.65  | 3 | 2420.93 | 706.29  | HexNAc-187-<br>316                   | 1714.6432 | <sup>19</sup> NDGMHEASDPATSHDM <sup>34</sup>         | 74  | 29 |
| A7FB95_A<br>CIBT | Uncharacterized protein<br>[A1S_3658] [Acinetobacter<br>baumannii (strain ATCC 17978<br>/ NCDC KC 755)] | 1685.19 | 2 | 3369.38 | 1412.60 | double glycan;<br>HexNAc-187-<br>316 | 1956.7811 | <sup>19</sup> NDGMHEASDPATSHDMNK <sup>36</sup>       | 104 | 30 |
| A7FB95_A<br>CIBT | Uncharacterized protein<br>[A1S_3658] [Acinetobacter<br>baumannii (strain ATCC 17978<br>/ NCDC KC 755)] | 1332.53 | 2 | 2664.06 | 706.29  | HexNAc-187-<br>316                   | 1957.7651 | <sup>19</sup> N(+1)DGMHEASDPATSHDMNK <sup>36</sup>   | 97  | 31 |
| A7FB95_A<br>CIBT | Uncharacterized protein<br>[A1S_3658] [Acinetobacter<br>baumannii (strain ATCC 17978<br>/ NCDC KC 755)] | 783.32  | 3 | 2347.93 | 390.17  | HexNAc-187                           | 1957.7651 | <sup>19</sup> N(+1)DGMHEASDPATSHDMNK <sup>36</sup>   | 82  | 32 |
| A7FB95_A<br>CIBT | Uncharacterized protein<br>[A1S_3658] [Acinetobacter<br>baumannii (strain ATCC 17978<br>/ NCDC KC 755)] | 1332.04 | 2 | 2663.08 | 706.30  | HexNAc-187-<br>316                   | 1956.7811 | <sup>19</sup> NDGMHEASDPATSHDMNK <sup>36</sup>       | 77  | 33 |
| A7FB95_A<br>CIBT | Uncharacterized protein<br>[A1S_3658] [Acinetobacter<br>baumannii (strain ATCC 17978<br>/ NCDC KC 755)] | 782.99  | 3 | 2346.95 | 390.17  | HexNAc-187                           | 1956.7811 | <sup>19</sup> NDGMHEASDPATSHDMNK <sup>36</sup>       | 55  | 34 |

|                  |                                                                                                         |         |   |         |         |                                      |           |                                                                                       |     |    |
|------------------|---------------------------------------------------------------------------------------------------------|---------|---|---------|---------|--------------------------------------|-----------|---------------------------------------------------------------------------------------|-----|----|
| A7FB95_A<br>CIBT | Uncharacterized protein<br>[A1S_3658] [Acinetobacter<br>baumannii (strain ATCC 17978<br>/ NCDC KC 755)] | 1129.12 | 3 | 3385.35 | 1412.58 | double glycan;<br>HexNAc-187-<br>316 | 1972.776  | <sup>19</sup> NDGM(+16)HEASDPATSHDMNK <sup>36</sup>                                   | 55  | 35 |
| A7FB95_A<br>CIBT | Uncharacterized protein<br>[A1S_3658] [Acinetobacter<br>baumannii (strain ATCC 17978<br>/ NCDC KC 755)] | 893.69  | 3 | 2679.07 | 706.29  | HexNAc-187-<br>316                   | 1972.776  | <sup>19</sup> NDGM(+16)HEASDPATSHDMNK <sup>36</sup>                                   | 37  | 36 |
| A7FB95_A<br>CIBT | Uncharacterized protein<br>[A1S_3658] [Acinetobacter<br>baumannii (strain ATCC 17978<br>/ NCDC KC 755)] | 894.02  | 3 | 2680.05 | 706.27  | HexNAc-187-<br>316                   | 1973.776  | <sup>19</sup> NDGM(+16)HEASDPATSHDMNK <sup>36</sup>                                   | 27  | 37 |
| A3M954_A<br>CIBT | Uncharacterized protein<br>[A1S_3051] [Acinetobacter<br>baumannii (strain ATCC 17978<br>/ NCDC KC 755)] | 1034.12 | 3 | 3100.35 | 706.30  | HexNAc-187-<br>316                   | 2394.0579 | <sup>333</sup> NEGSAELDELFDGGAASEAPADTK <sup>356</sup>                                | 111 | 38 |
| A3M954_A<br>CIBT | Uncharacterized protein<br>[A1S_3051] [Acinetobacter<br>baumannii (strain ATCC 17978<br>/ NCDC KC 755)] | 1269.55 | 3 | 3806.64 | 1412.59 | double glycan;<br>HexNAc-187-<br>316 | 2394.0579 | <sup>333</sup> NEGSAELDELFDGGAASEAPADTK <sup>356</sup>                                | 21  | 39 |
| F0QK73_A<br>CIBD | Uncharacterized protein<br>[ABTW07_0162]<br>[Acinetobacter baumannii<br>(strain TCDC-AB0715)]           | 1391.91 | 4 | 5564.63 | 706.30  | HexNAc-187-<br>316                   | 4858.3324 | <sup>94</sup> NQGTAM(+16)IVEAPSTAQPAASEPAS<br>VSTDDTTDSTAAIPQQPNYILQVR <sup>140</sup> | 20  | 40 |
| B0VBI1_A<br>CIBY | Uncharacterized protein<br>[ABAYE2277] [Acinetobacter<br>baumannii (strain AYE)]                        | 998.09  | 3 | 2992.24 | 706.29  | HexNAc-187-<br>316                   | 2285.951  | <sup>25</sup> NSKNDGMHEASDPATSHDMNK <sup>45</sup>                                     | 67  | 41 |
| A3M160_A<br>CIBT | Uncharacterized protein<br>[A1S_0171] [Acinetobacter<br>baumannii (strain ATCC 17978<br>/ NCDC KC 755)] | 759.81  | 4 | 3036.20 | 706.29  | HexNAc-187-<br>316                   | 2329.9053 | <sup>49</sup> QMMESHEQMNHAEHSSSAQ <sup>68</sup>                                       | 60  | 42 |
| N9IX31_A<br>CIBA | Uncharacterized protein<br>[F920_00864] [Acinetobacter<br>baumannii NIPH 335]                           | 1017.47 | 3 | 3050.39 | 706.30  | HexNAc-187-<br>316                   | 2344.0899 | <sup>50</sup> QVVQQDEQSVESSAAQPQTSP <sup>71</sup>                                     | 67  | 43 |
| A7FB63_A<br>CIBT | Uncharacterized protein<br>[A1S_3626] [Acinetobacter<br>baumannii (strain ATCC 17978<br>/ NCDC KC 755)] | 1050.45 | 3 | 3149.34 | 1412.58 | double glycan;<br>HexNAc-187-<br>316 | 1736.757  | <sup>48</sup> SAGDQAASDIATATDNASA <sup>66</sup>                                       | 81  | 44 |

|                  |                                                                                                         |         |   |         |         |                                      |           |                                                                      |     |    |
|------------------|---------------------------------------------------------------------------------------------------------|---------|---|---------|---------|--------------------------------------|-----------|----------------------------------------------------------------------|-----|----|
| A7FB63_A<br>CIBT | Uncharacterized protein<br>[A1S_3626] [Acinetobacter<br>baumannii (strain ATCC 17978<br>/ NCDC KC 755)] | 1286.07 | 2 | 2571.14 | 706.29  | HexNAc-187-<br>316                   | 1864.8519 | <sup>48</sup> SAGDQAASDIATATDNASAK <sup>67</sup>                     | 127 | 45 |
| A7FB63_A<br>CIBT | Uncharacterized protein<br>[A1S_3626] [Acinetobacter<br>baumannii (strain ATCC 17978<br>/ NCDC KC 755)] | 1639.22 | 2 | 3277.44 | 1412.59 | double glycan;<br>HexNAc-187-<br>316 | 1864.8519 | <sup>48</sup> SAGDQAASDIATATDNASAK <sup>67</sup>                     | 68  | 46 |
| A7FB63_A<br>CIBT | Uncharacterized protein<br>[A1S_3626] [Acinetobacter<br>baumannii (strain ATCC 17978<br>/ NCDC KC 755)] | 1328.58 | 3 | 3983.73 | 2118.88 | triple glycan;<br>HexNAc-187-<br>316 | 1864.8519 | <sup>48</sup> SAGDQAASDIATATDNASAK <sup>67</sup>                     | 52  | 47 |
| A7FB63_A<br>CIBT | Uncharacterized protein<br>[A1S_3626] [Acinetobacter<br>baumannii (strain ATCC 17978<br>/ NCDC KC 755)] | 987.78  | 3 | 2961.31 | 1096.46 | HexNAc-187-<br>316HexNAc-<br>187     | 1864.8519 | <sup>48</sup> SAGDQAASDIATATDNASAK <sup>67</sup>                     | 31  | 48 |
| A7FAU3_A<br>CIBT | Uncharacterized protein<br>[A1S_3506] [Acinetobacter<br>baumannii (strain ATCC 17978<br>/ NCDC KC 755)] | 793.39  | 3 | 2378.14 | 706.29  | HexNAc-187-<br>316                   | 1671.8548 | <sup>22</sup> SKKEEAPAAAAASEAVAA <sup>39</sup>                       | 34  | 49 |
| N9F4N9_A<br>CICA | Uncharacterized protein<br>[F936_02973] [Acinetobacter<br>calcoaceticus DSM 30006 =<br>CIP 81.8]        | 1428.33 | 3 | 4282.97 | 706.25  | HexNAc-187-<br>316                   | 3576.726  | <sup>30</sup> STAGEEKVVVSTQEANTATAATDAVG<br>SASEAAPATR <sup>66</sup> | 49  | 50 |
| A3M3E7_A<br>CIBT | Putative lipoprotein<br>[A1S_1009] [Acinetobacter<br>baumannii (strain ATCC 17978<br>/ NCDC KC 755)]    | 1194.53 | 3 | 3581.57 | 706.29  | HexNAc-187-<br>316                   | 2875.2824 | <sup>25</sup> TETTSASTPVQTAQTNNNEAVDTAHT<br>A <sup>52</sup>          | 59  | 51 |
| A3M3E7_A<br>CIBT | Putative lipoprotein<br>[A1S_1009] [Acinetobacter<br>baumannii (strain ATCC 17978<br>/ NCDC KC 755)]    | 1157.26 | 4 | 4626.03 | 706.30  | HexNAc-187-<br>316                   | 3919.7337 | <sup>25</sup> TETTSASTPVQTAQTNNNEAVDTAHT<br>AENSLDWDGK <sup>61</sup> | 55  | 52 |
| N9KIL3_A<br>CIBA | Uncharacterized protein<br>[F914_00444] [Acinetobacter<br>baumannii NIPH 290]                           | 968.11  | 3 | 2902.32 | 1412.58 | double glycan;<br>HexNAc-187-<br>316 | 1489.7381 | <sup>56</sup> TKPSESSEPVVQT <sup>69</sup>                            | 32  | 53 |
| N9KIL3_A<br>CIBA | Uncharacterized protein<br>[F914_00444] [Acinetobacter<br>baumannii NIPH 290]                           | 1213.07 | 2 | 2425.14 | 706.29  | HexNAc-187-<br>316                   | 1718.8443 | <sup>56</sup> TKPSESSEPVVQTQT <sup>71</sup>                          | 56  | 54 |

|                  |                                                                                                         |         |   |         |         |                                      |           |                                                                          |     |    |
|------------------|---------------------------------------------------------------------------------------------------------|---------|---|---------|---------|--------------------------------------|-----------|--------------------------------------------------------------------------|-----|----|
| N9KIL3_A<br>CIBA | Uncharacterized protein<br>[F914_00444] [Acinetobacter<br>baumannii NIPH 290]                           | 832.73  | 3 | 2496.17 | 706.29  | HexNAc-187-<br>316                   | 1789.8814 | <sup>56</sup> TTKPSESSEPVVQTQTA <sup>72</sup>                            | 74  | 55 |
| N9KIL3_A<br>CIBA | Uncharacterized protein<br>[F914_00444] [Acinetobacter<br>baumannii NIPH 290]                           | 1248.59 | 2 | 2496.18 | 706.29  | HexNAc-187-<br>316                   | 1789.8814 | <sup>56</sup> TTKPSESSEPVVQTQTA <sup>72</sup>                            | 67  | 56 |
| N9KIL3_A<br>CIBA | Uncharacterized protein<br>[F914_00444] [Acinetobacter<br>baumannii NIPH 290]                           | 985.13  | 3 | 2953.37 | 706.30  | HexNAc-187-<br>316                   | 2247.0735 | <sup>56</sup> TTKPSESSEPVVQTQTANSQQ <sup>76</sup>                        | 72  | 57 |
| N9KIL3_A<br>CIBA | Uncharacterized protein<br>[F914_00444] [Acinetobacter<br>baumannii NIPH 290]                           | 1288.63 | 3 | 3863.88 | 706.30  | HexNAc-187-<br>316                   | 3157.5859 | <sup>56</sup> TTKPSESSEPVVQTQTANSQQLVNEDV<br>LK <sup>84</sup>            | 72  | 58 |
| N9KIL3_A<br>CIBA | Uncharacterized protein<br>[F914_00444] [Acinetobacter<br>baumannii NIPH 290]                           | 1257.38 | 4 | 5026.50 | 706.28  | HexNAc-187-<br>316                   | 4320.2205 | <sup>56</sup> TTKPSESSEPVVQTQTANSQQLVNEDV<br>LKQPIPAQESLAK <sup>95</sup> | 41  | 59 |
| A7FB17_A<br>CIBT | Uncharacterized protein<br>[A1S_3580] [Acinetobacter<br>baumannii (strain ATCC 17978<br>/ NCDC KC 755)] | 1193.90 | 3 | 3579.68 | 706.29  | HexNAc-187-<br>316                   | 2873.3872 | <sup>37</sup> VVVSTQEQANTANAASDAVGSASEAA<br>PATR <sup>66</sup>           | 122 | 60 |
| A7FB17_A<br>CIBT | Uncharacterized protein<br>[A1S_3580] [Acinetobacter<br>baumannii (strain ATCC 17978<br>/ NCDC KC 755)] | 1429.33 | 3 | 4285.97 | 1412.59 | double glycan;<br>HexNAc-187-<br>316 | 2873.3872 | <sup>37</sup> VVVSTQEQANTANAASDAVGSASEAA<br>PATR <sup>66</sup>           | 87  | 61 |

**Supplementary table 7:** Identifications are labeled according to the corresponding Uniprot accession number and protein name parent m/z, charge state, deconvoluted mass, glycan mass, glycan composition, peptide mass, peptide sequence and mascot ion score are provided for each identified glycopeptide. All identified glycopeptide HCD spectra are provided and are available on the designated pages

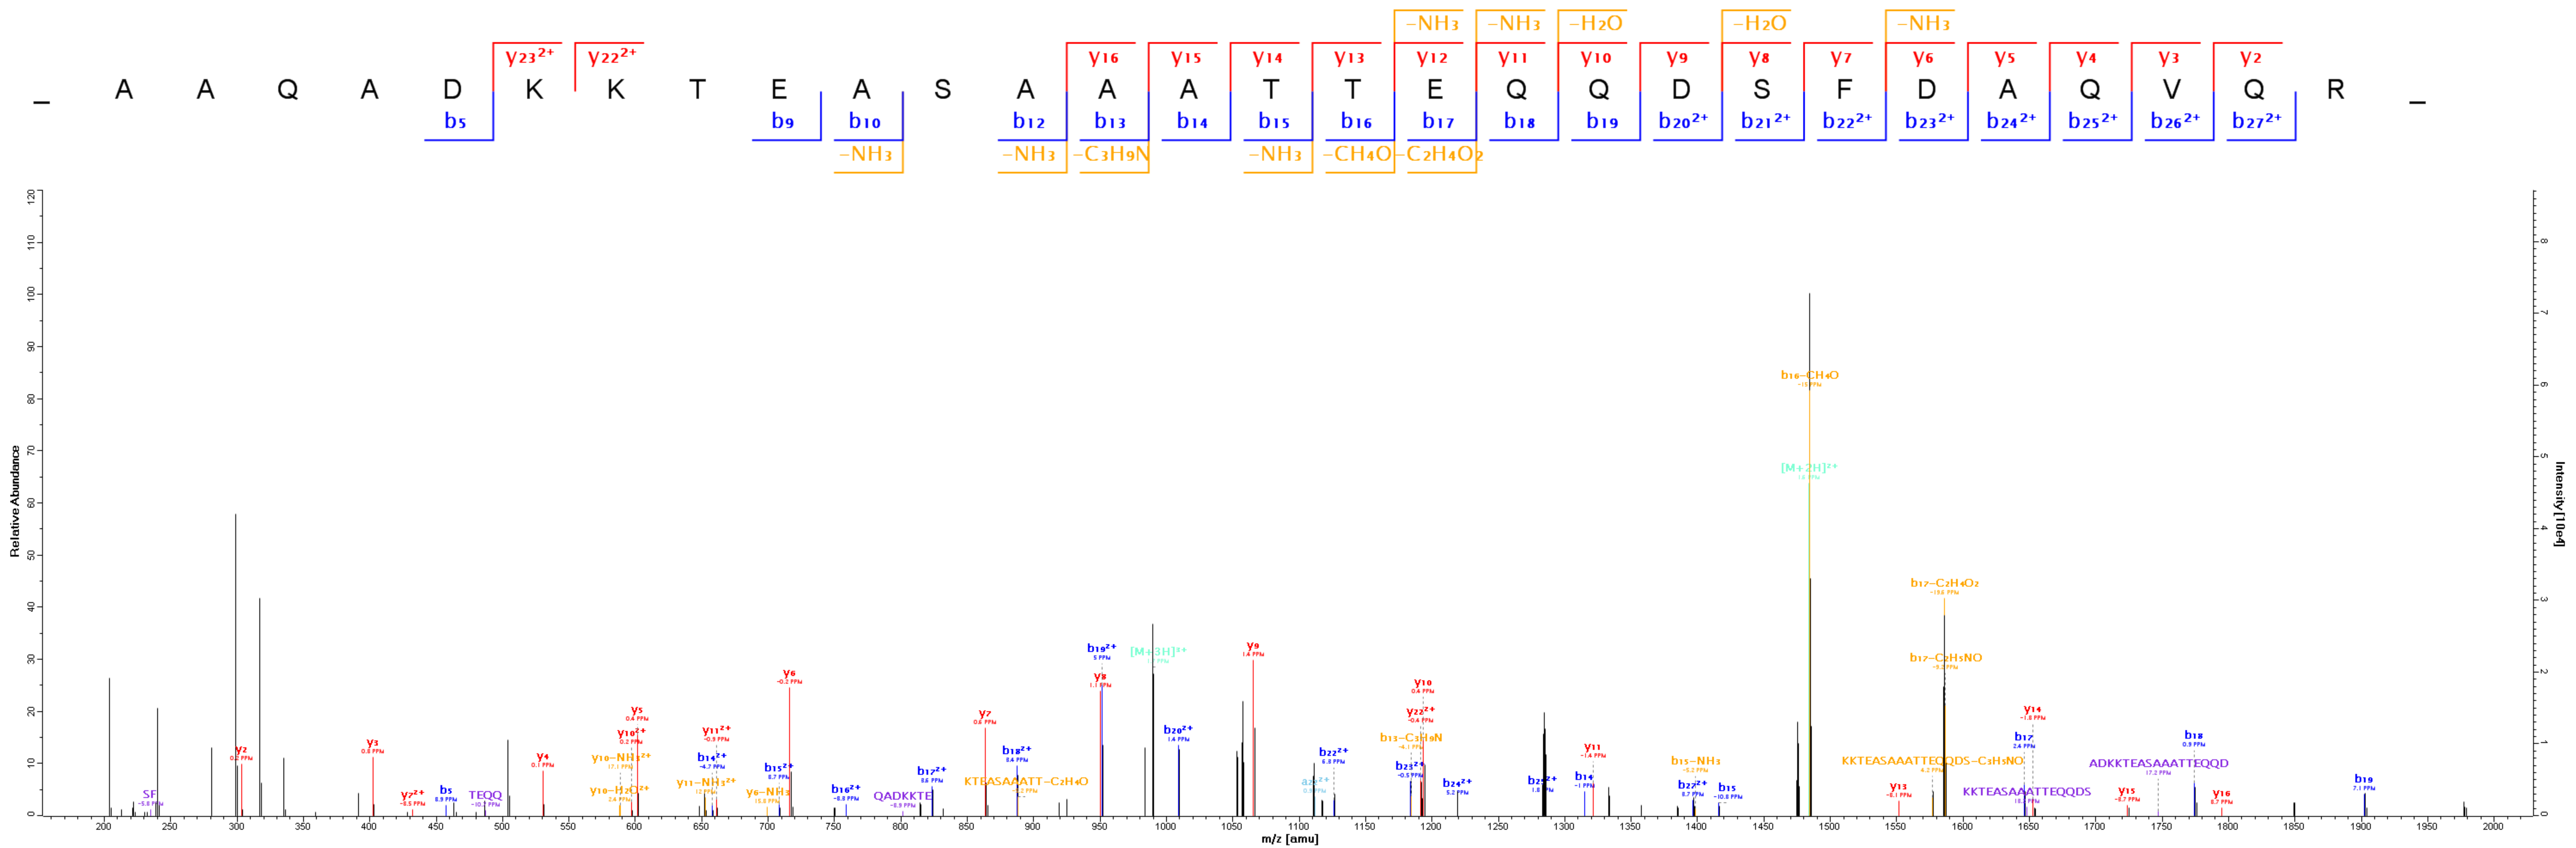

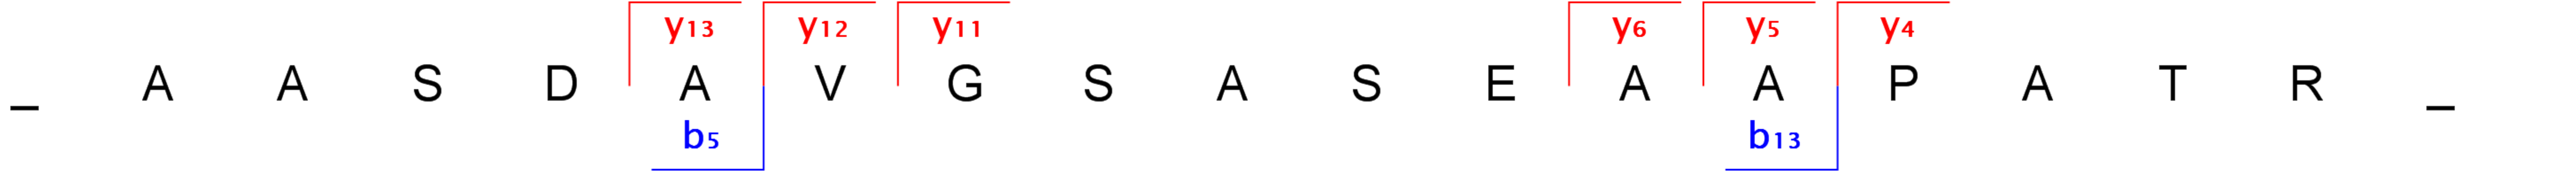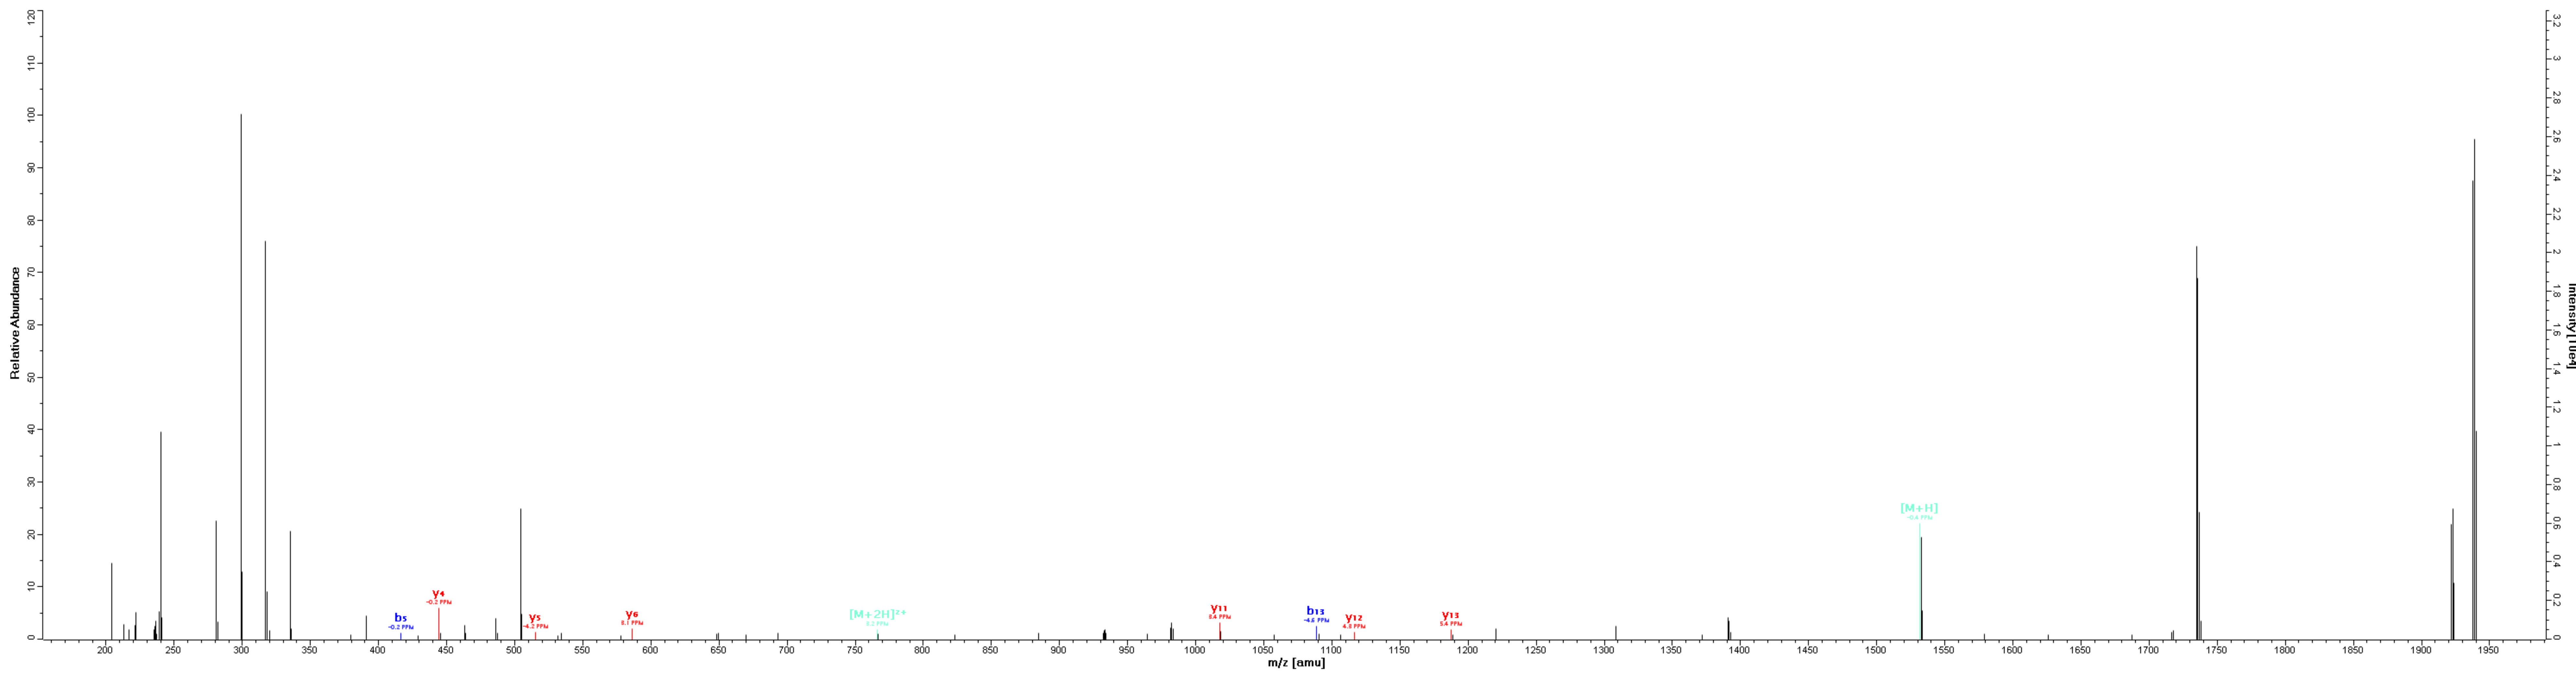



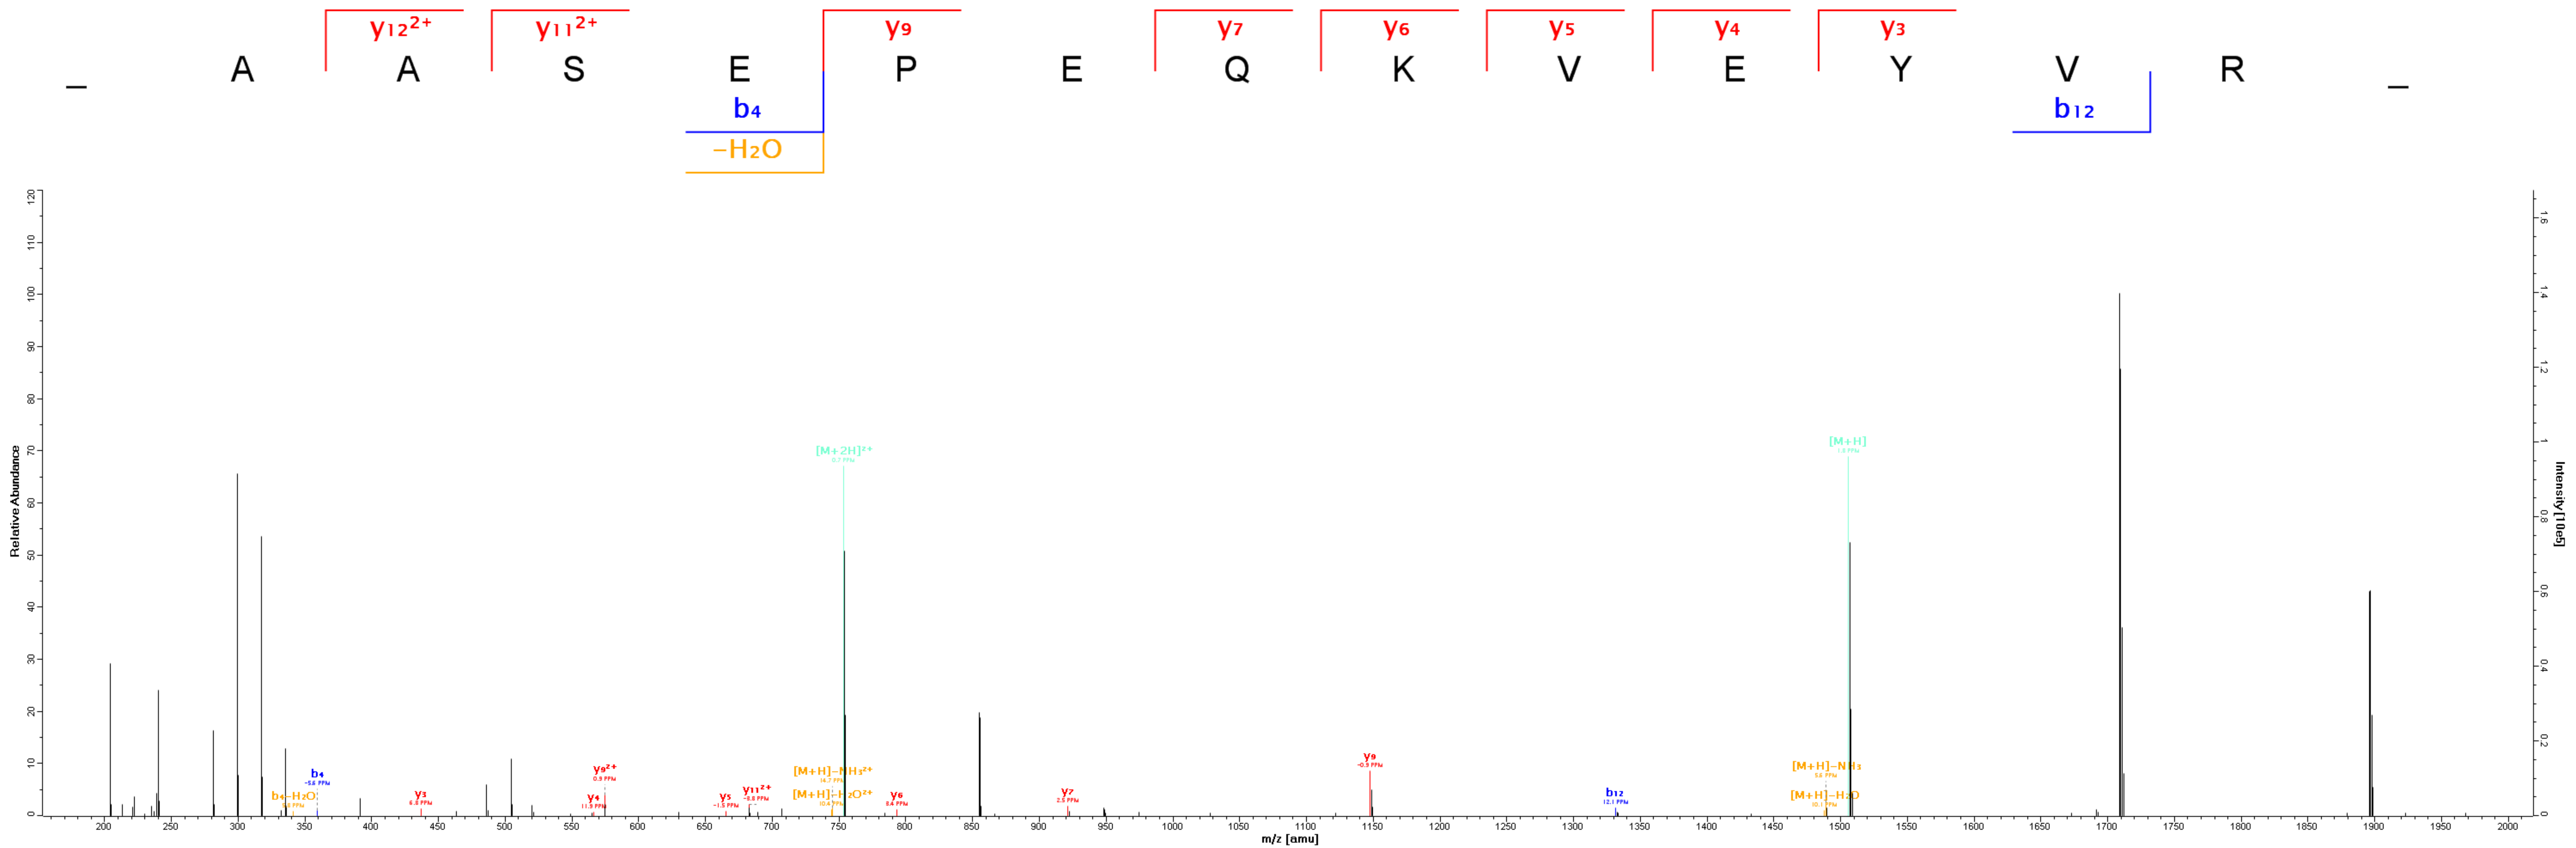

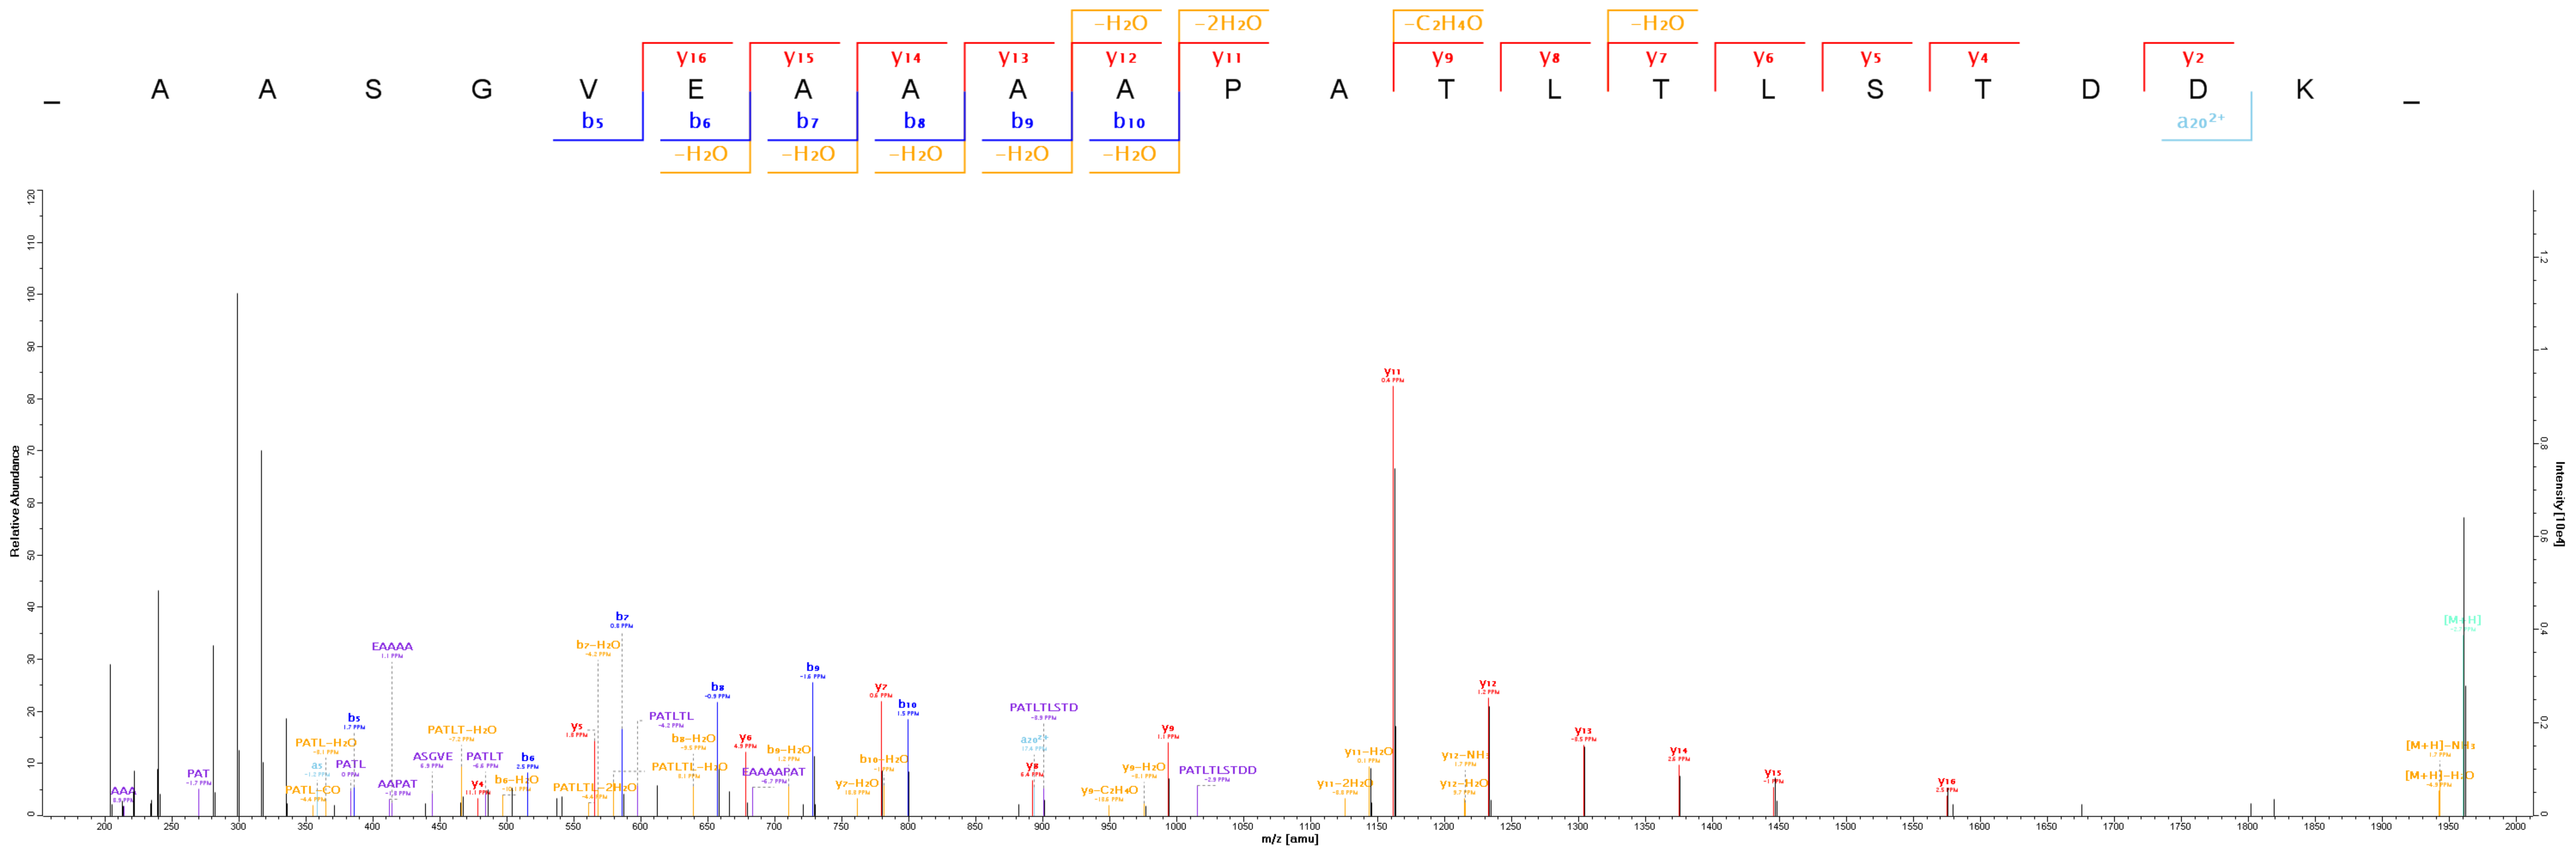

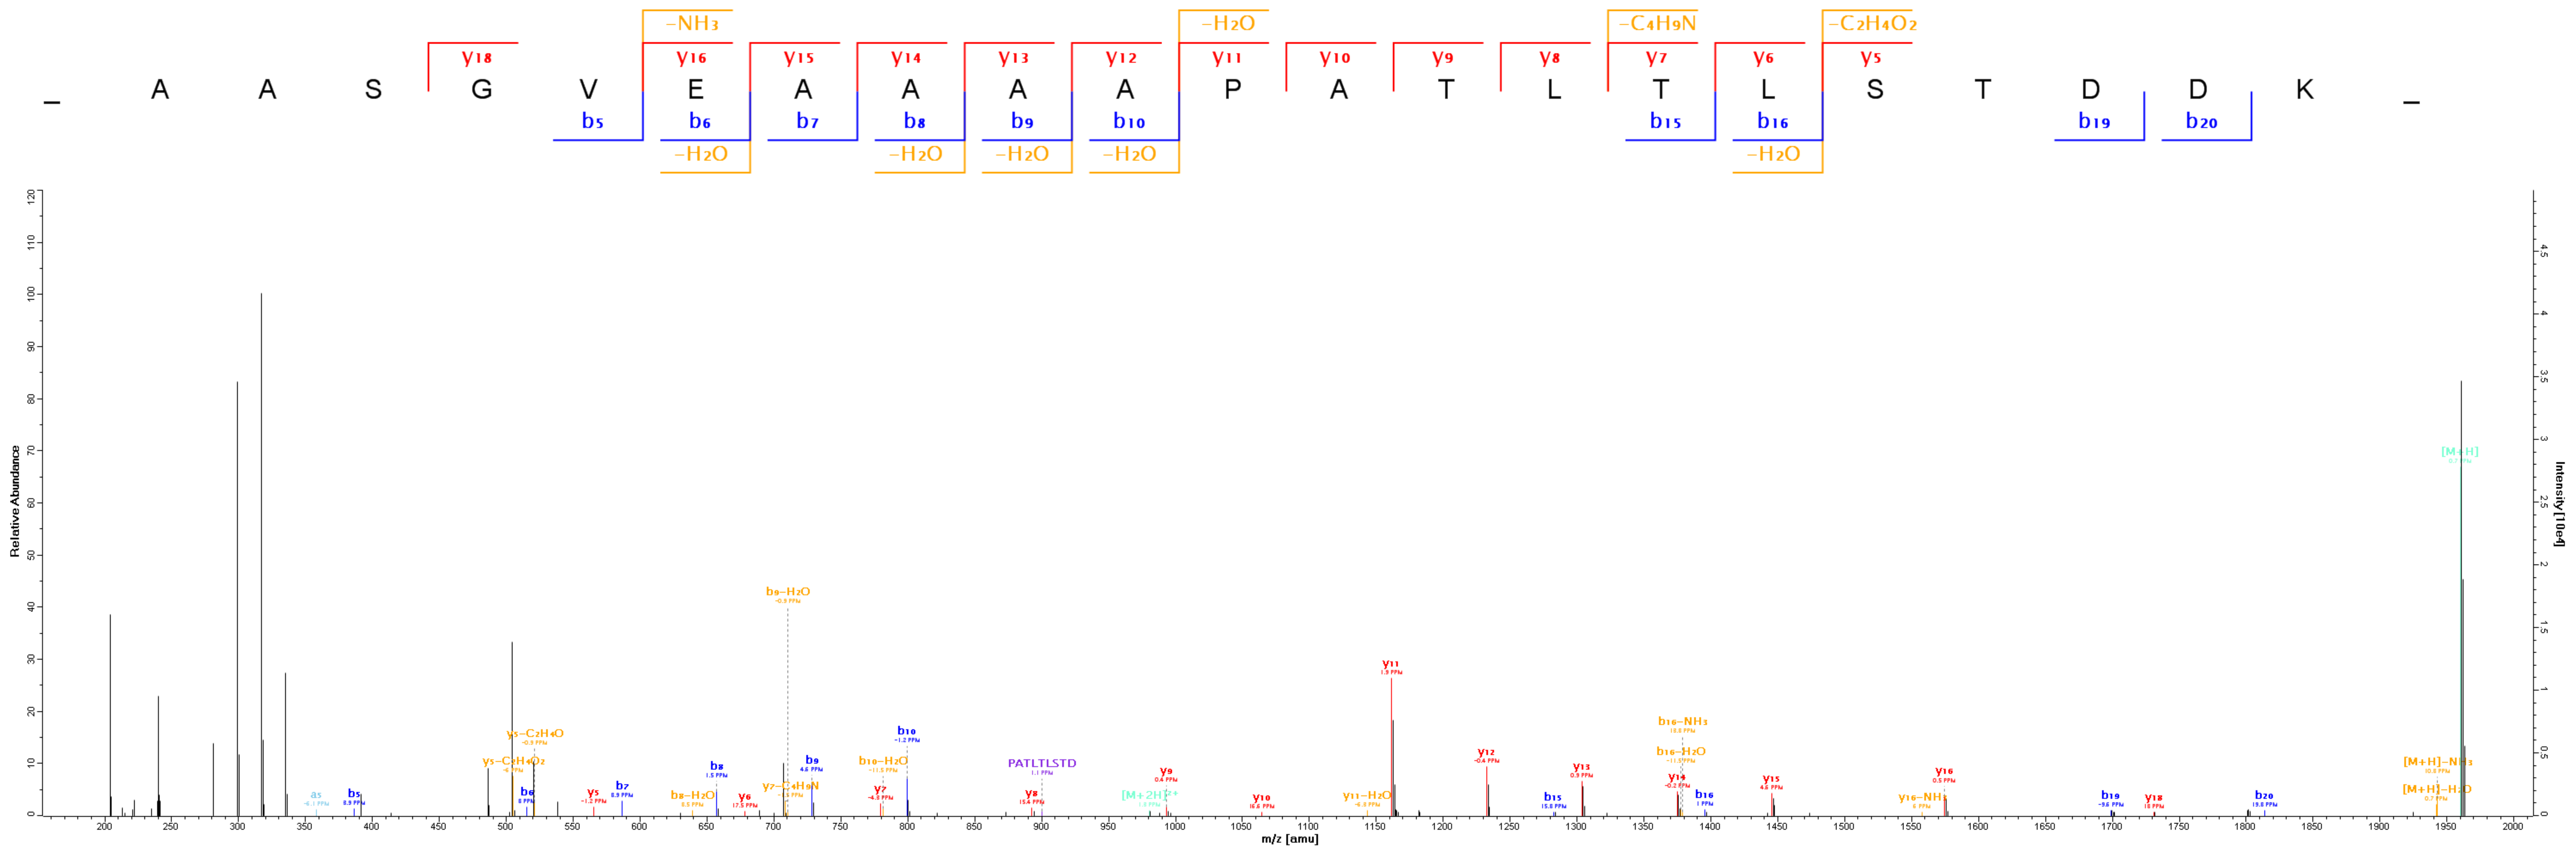

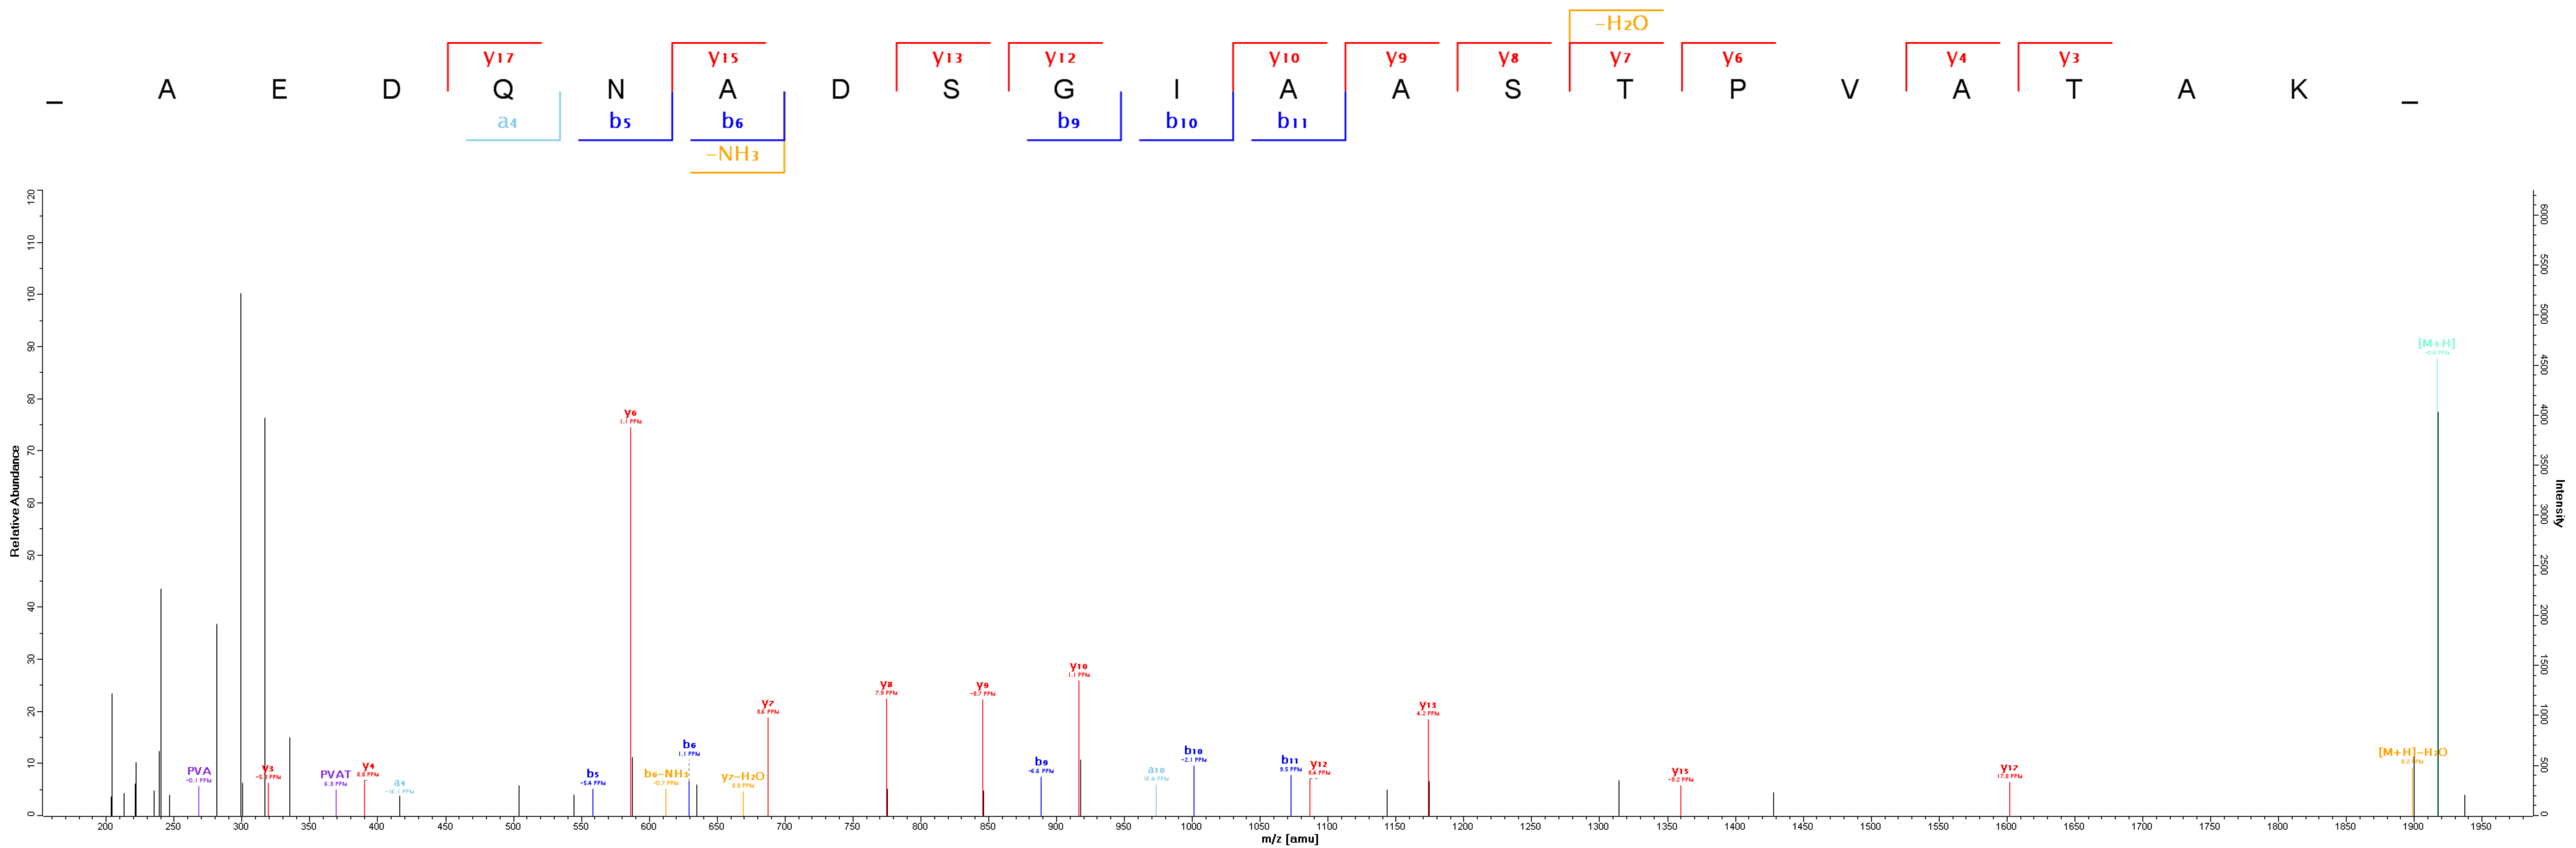

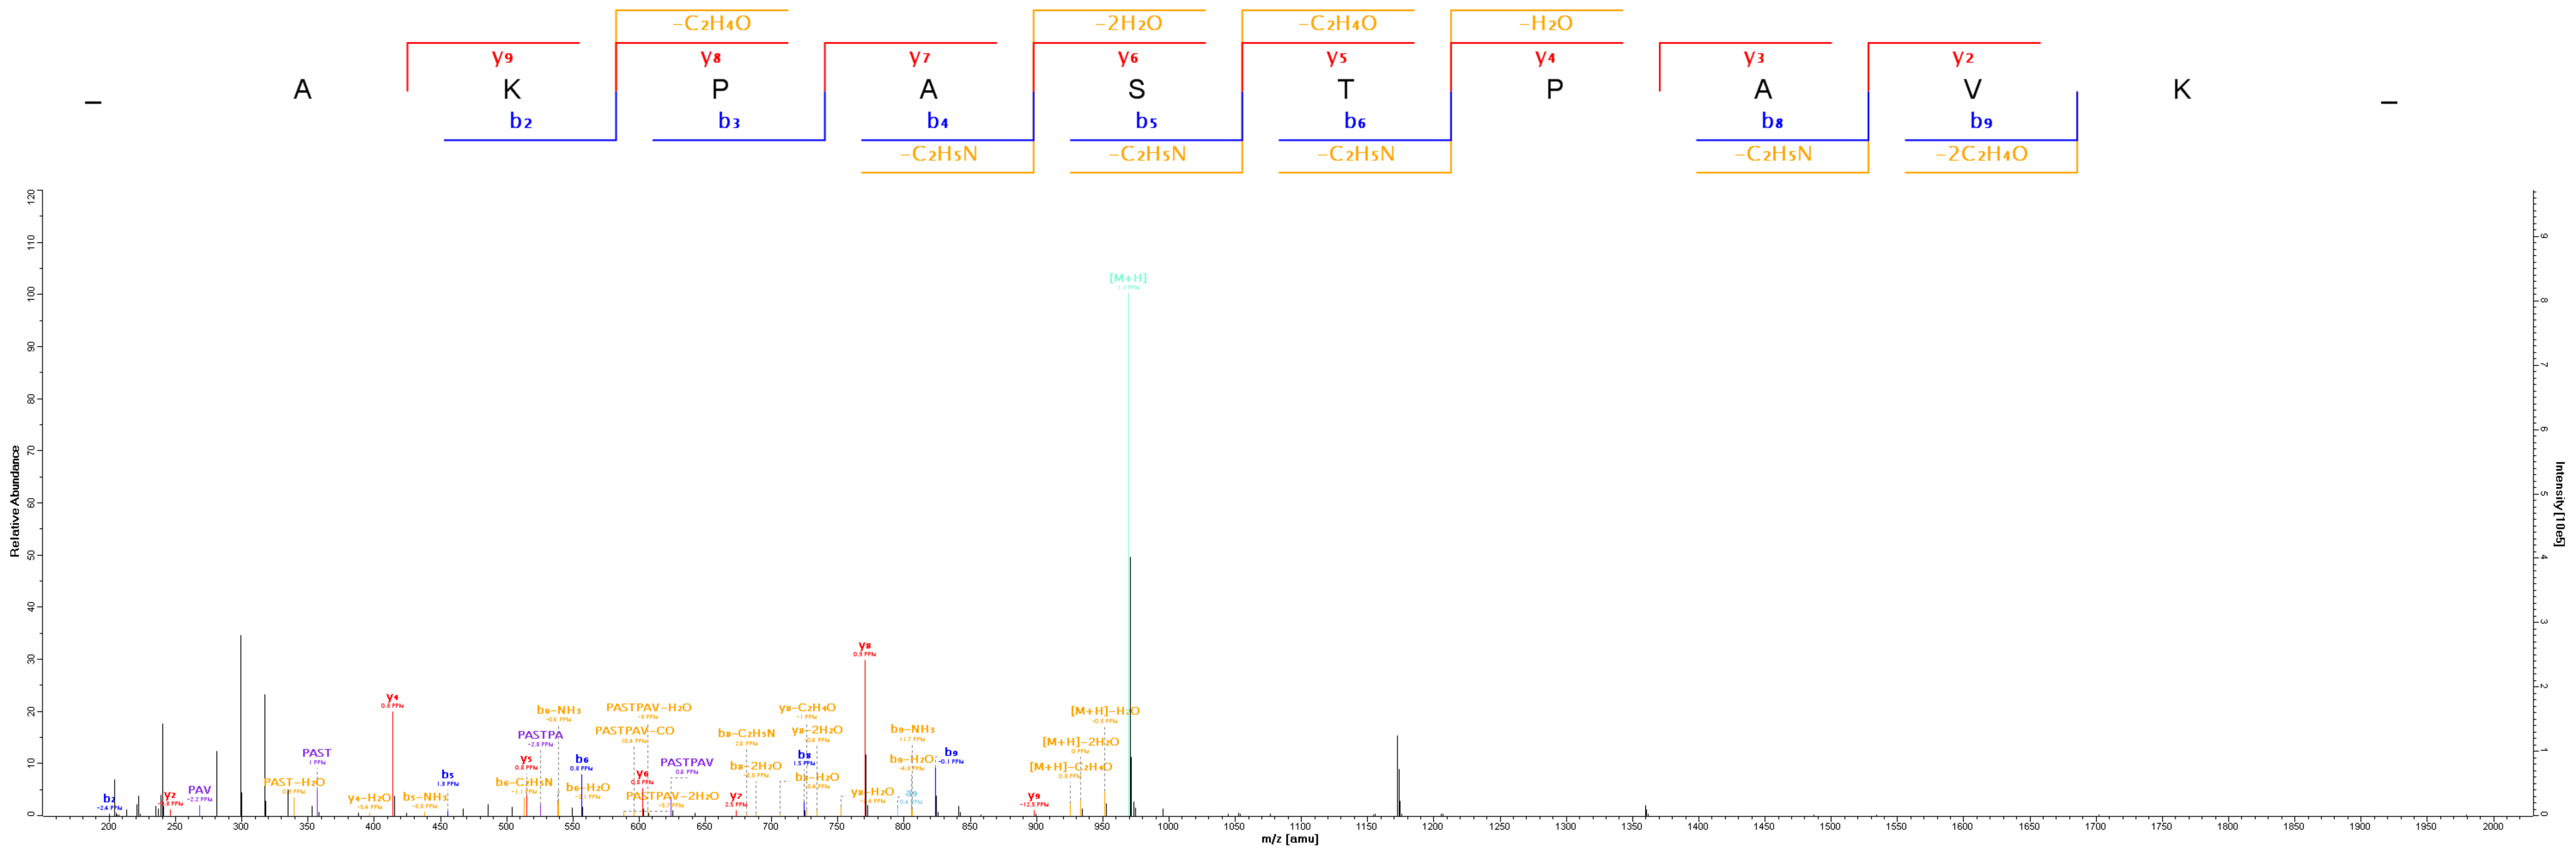

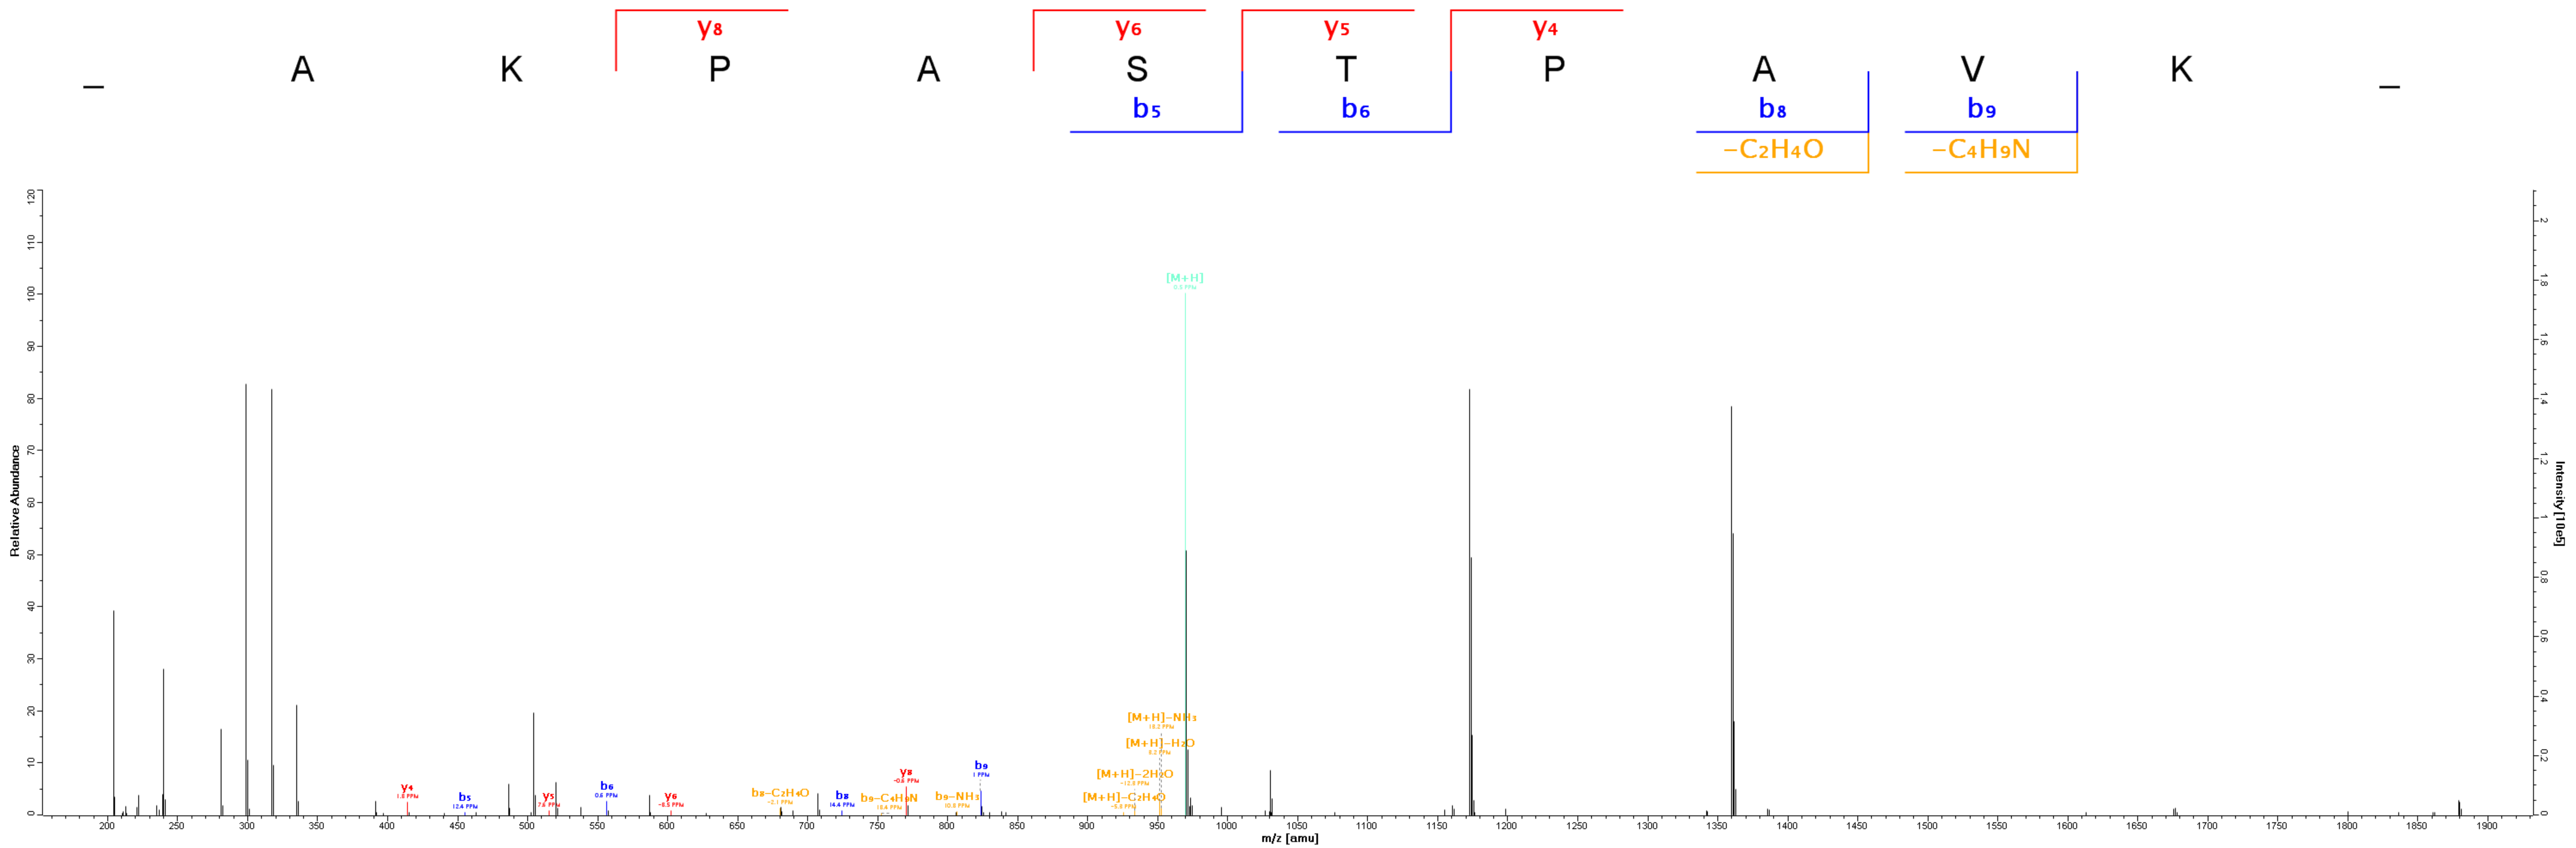

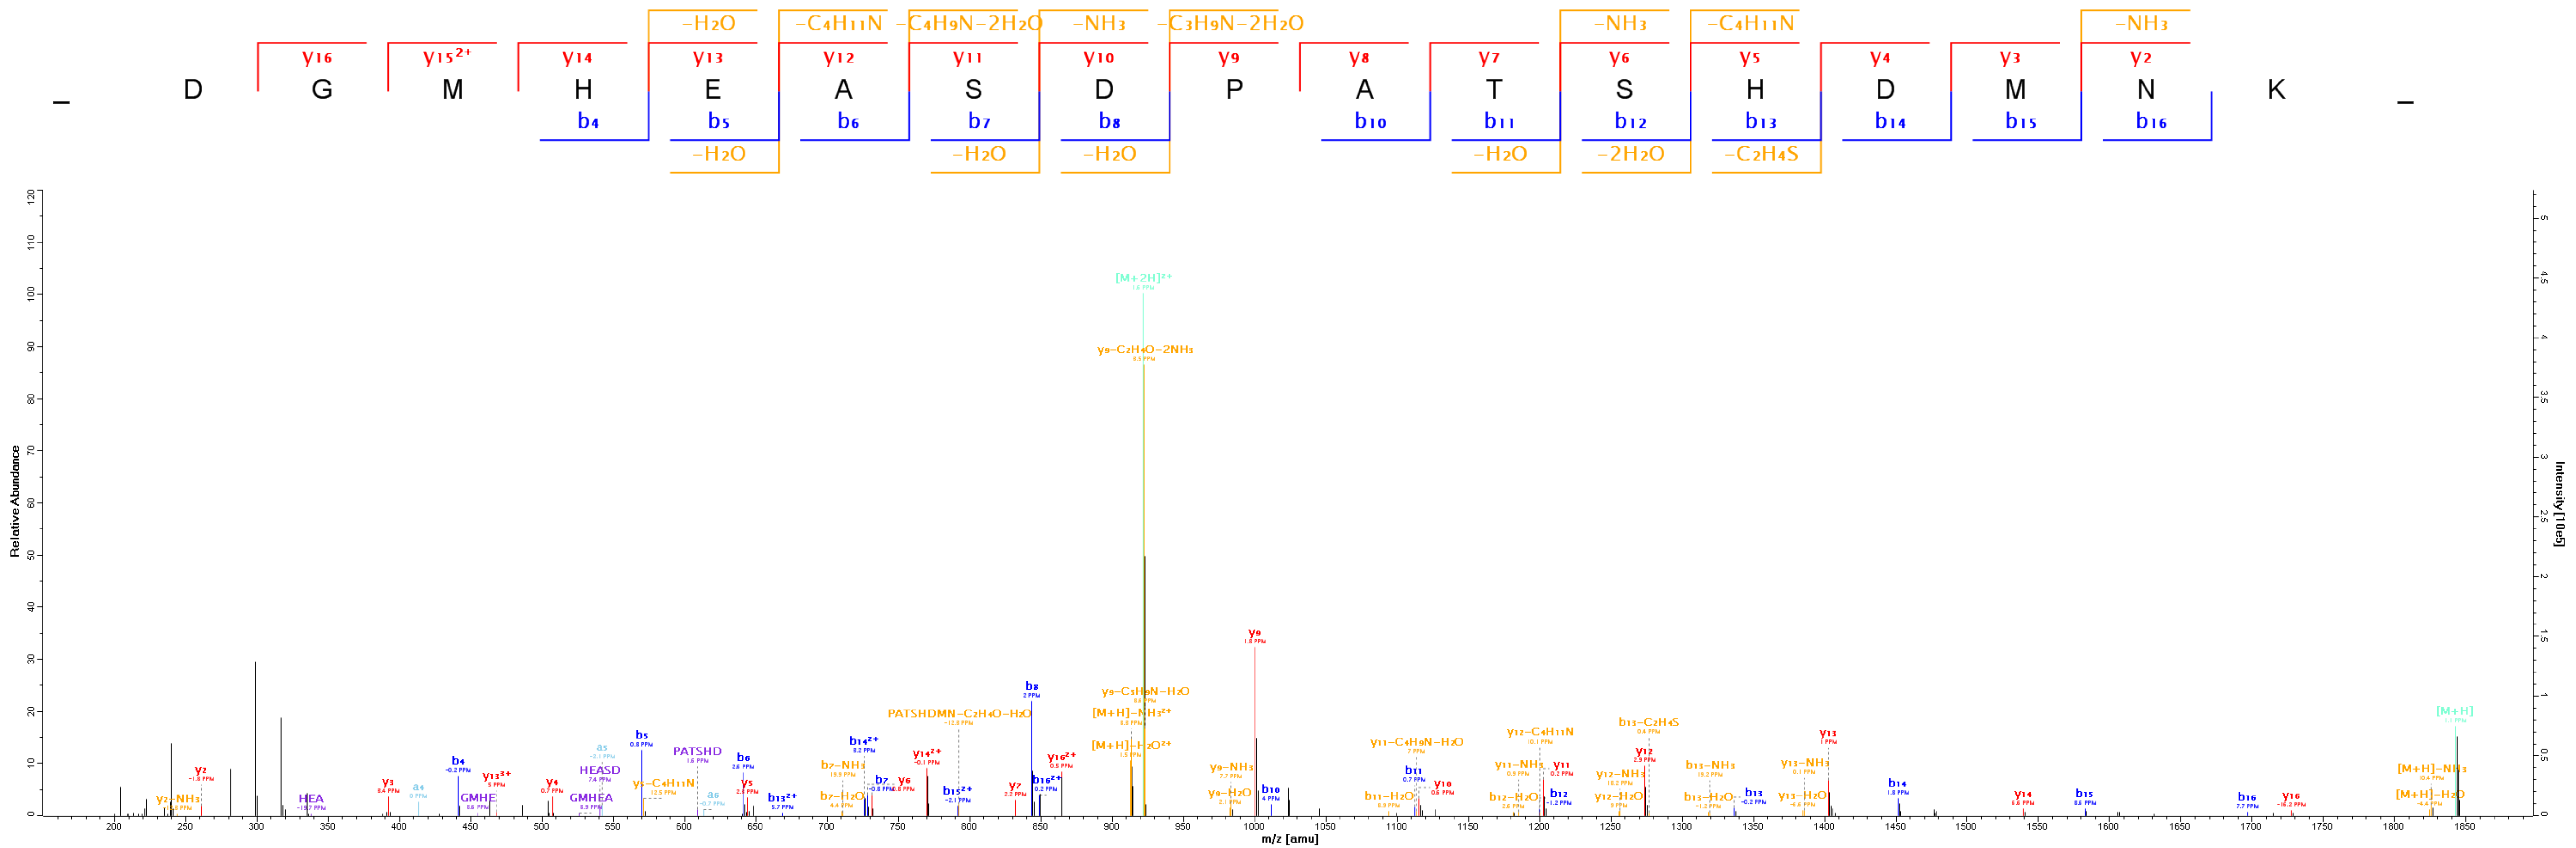

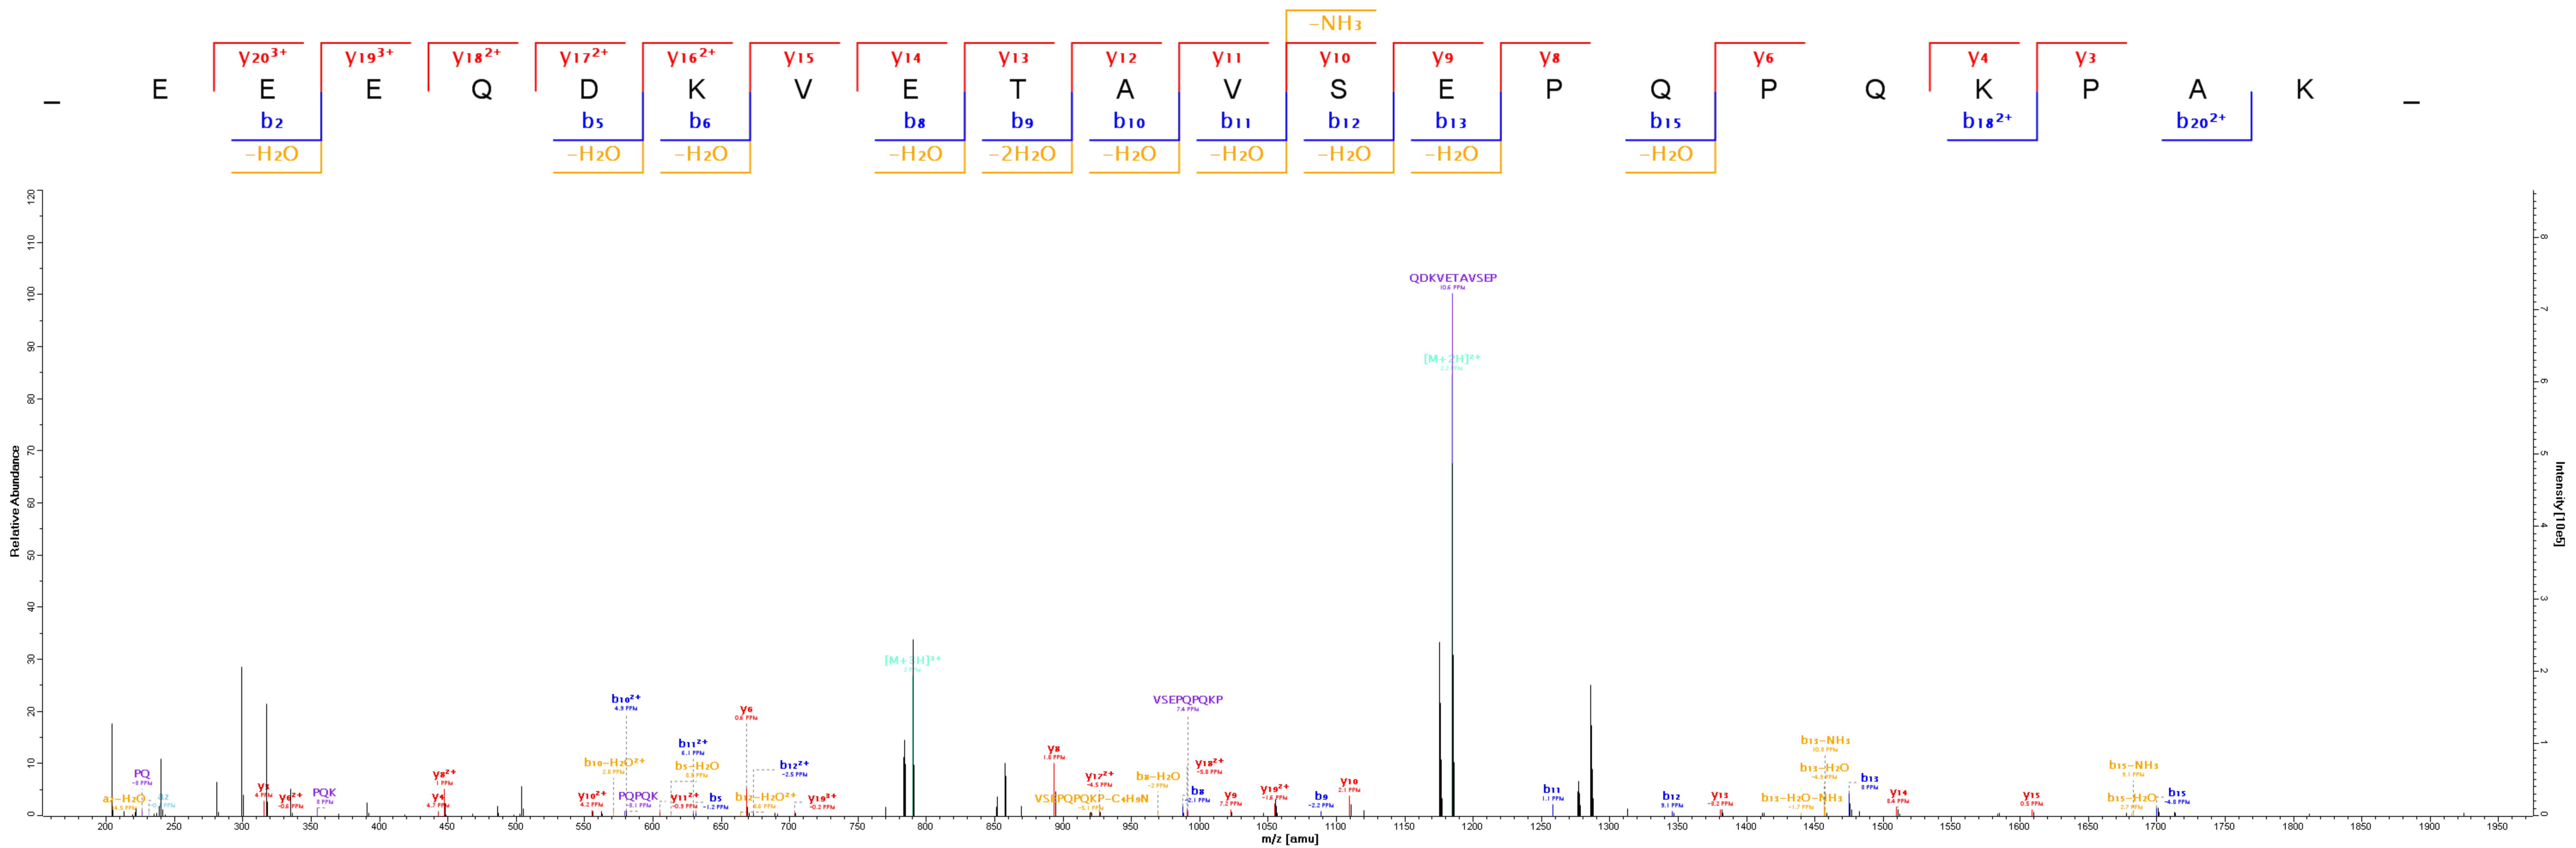



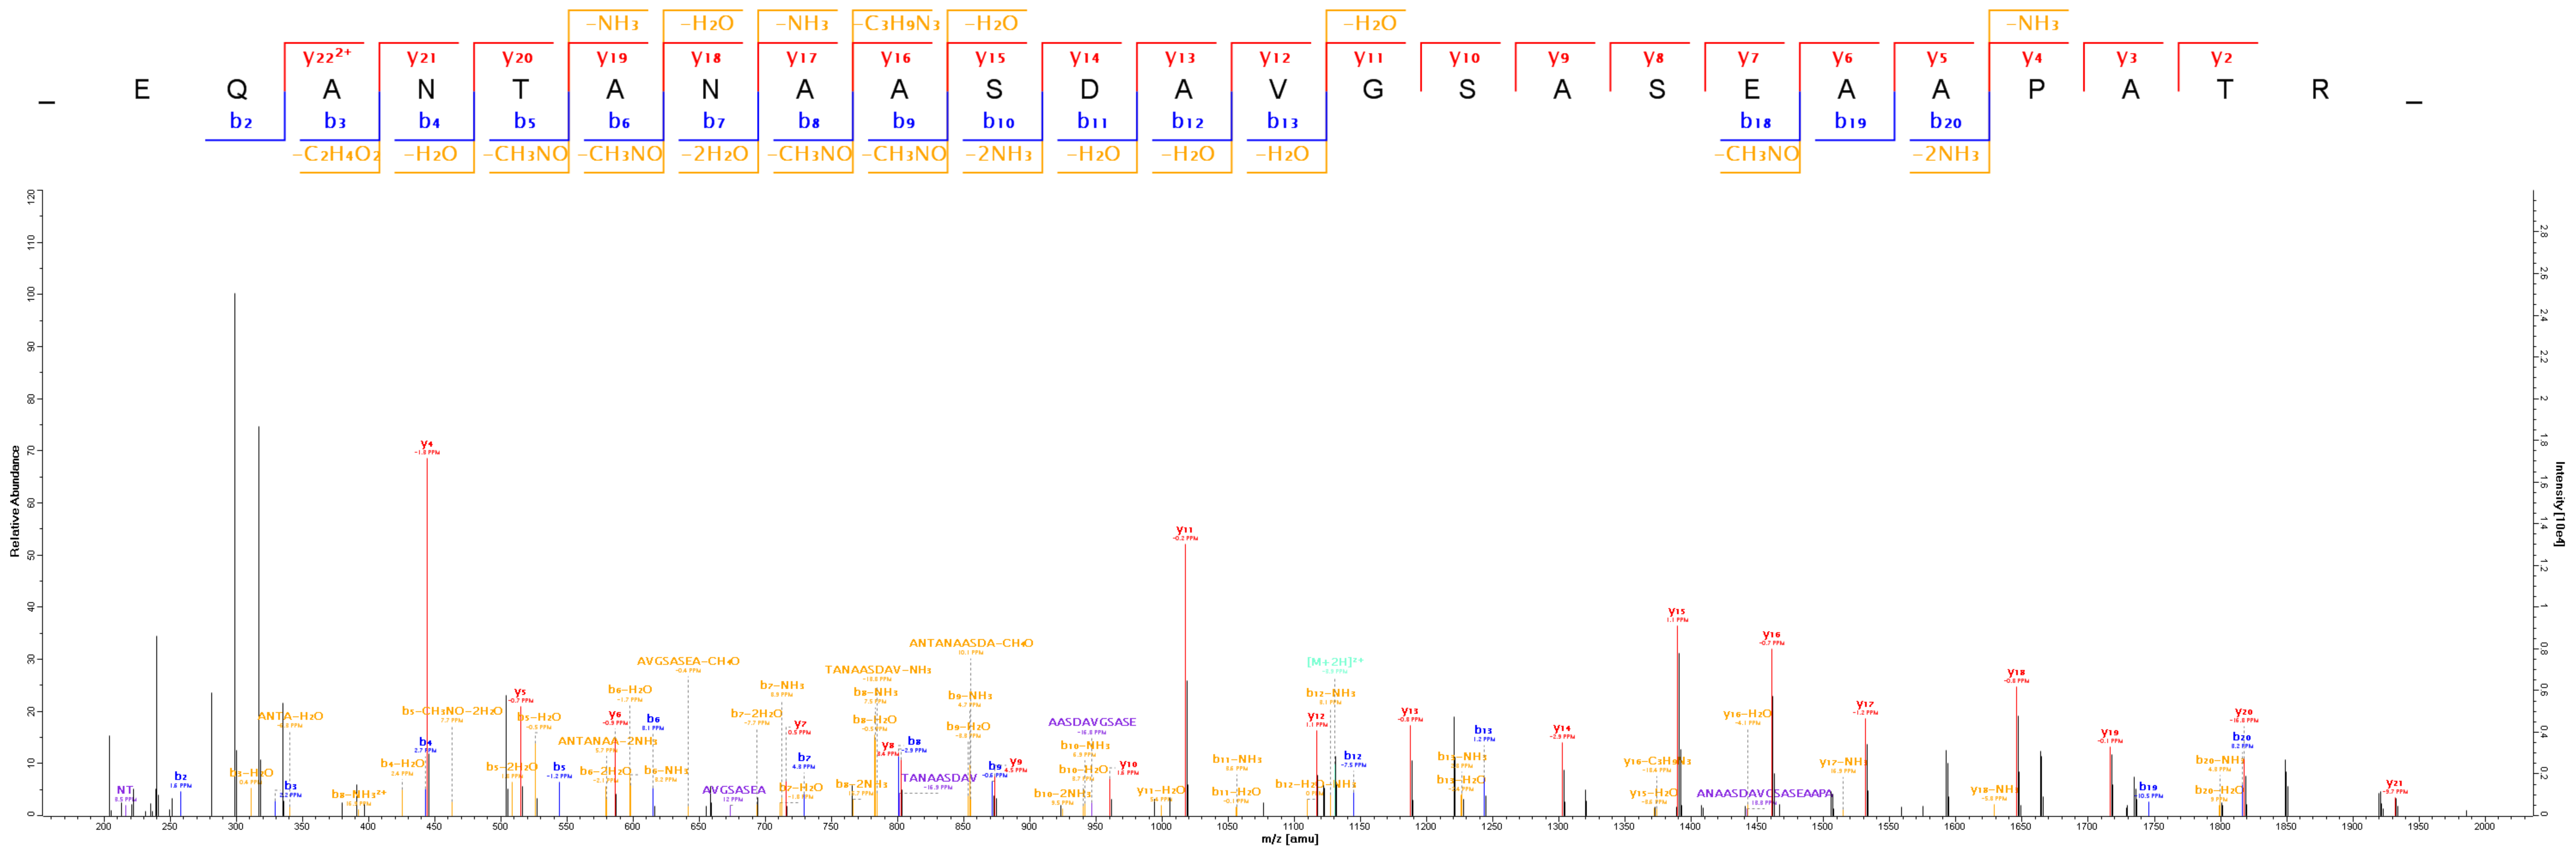

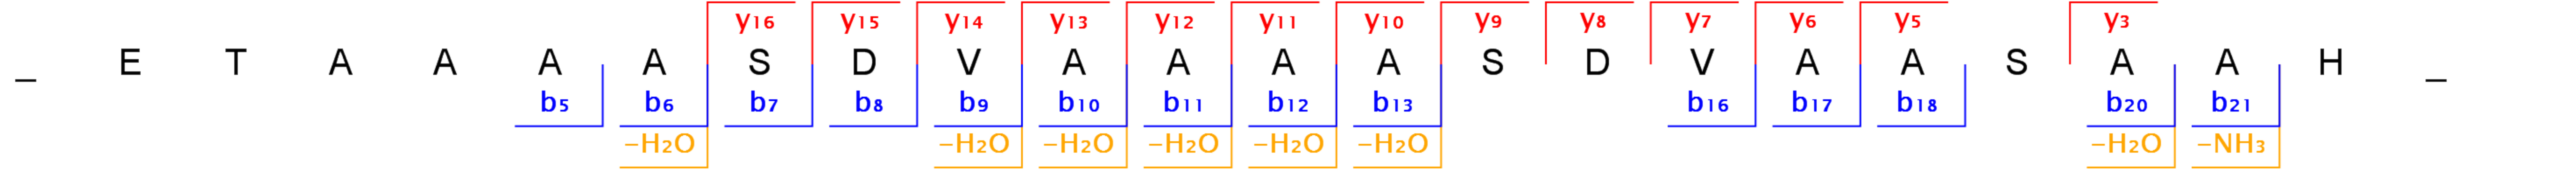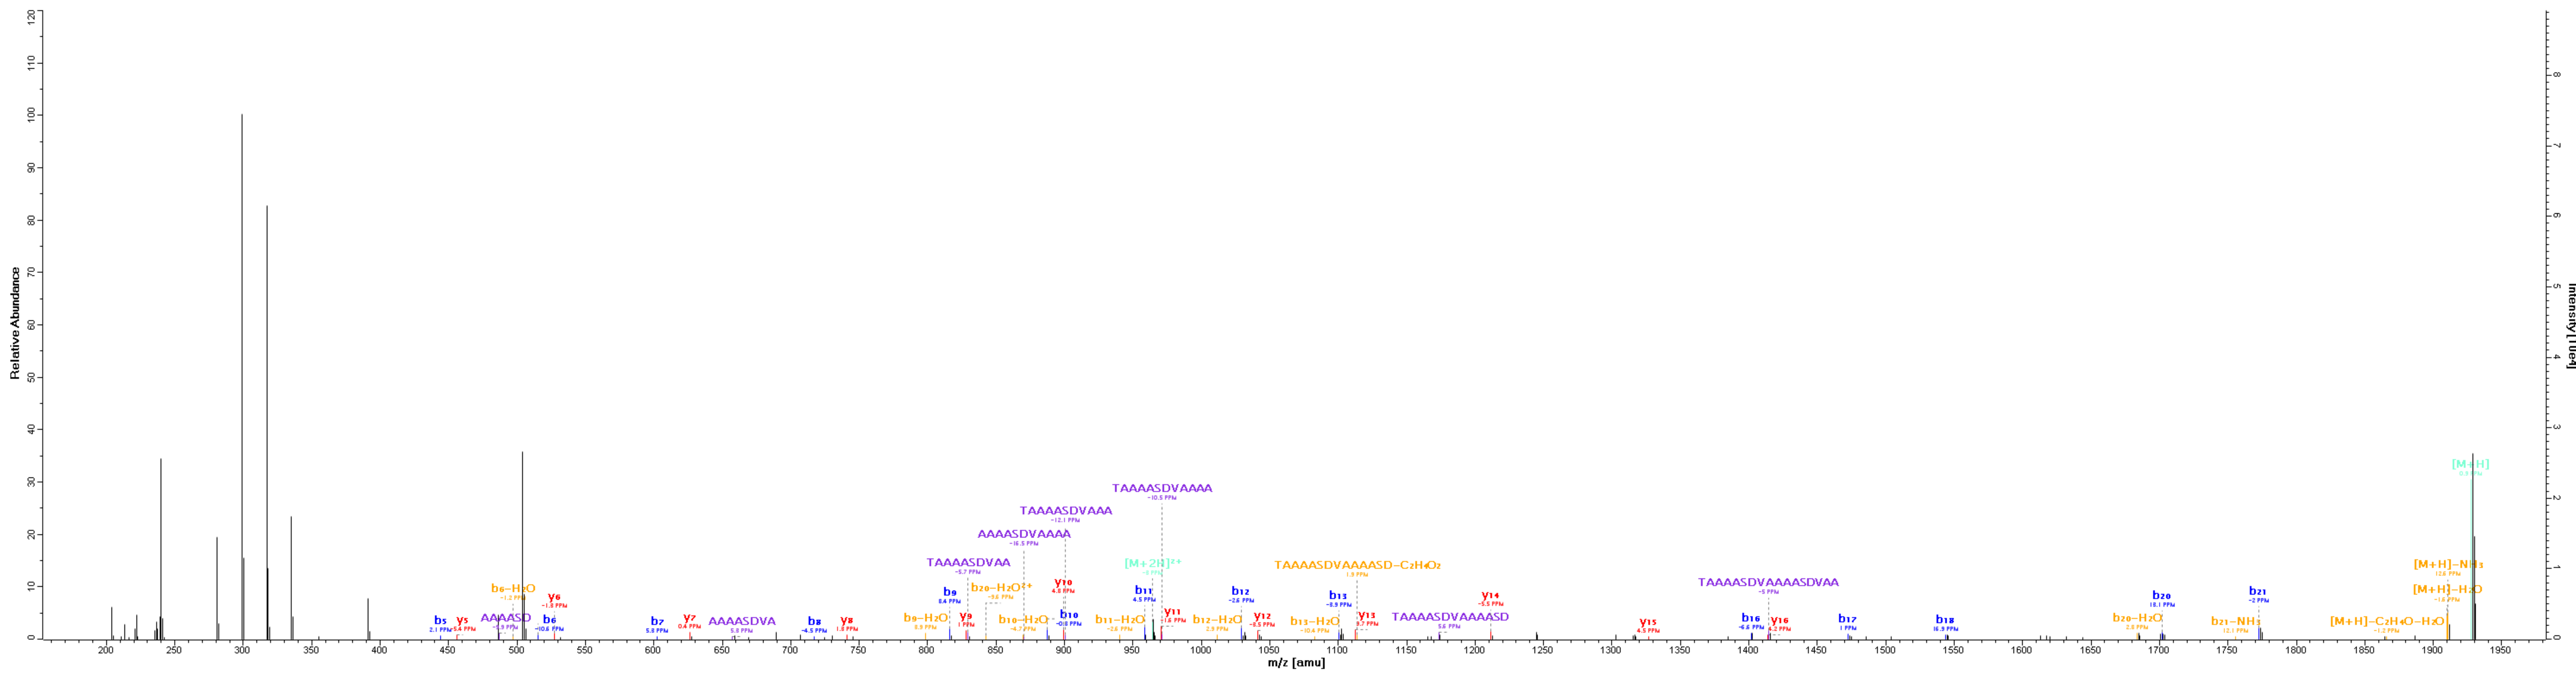

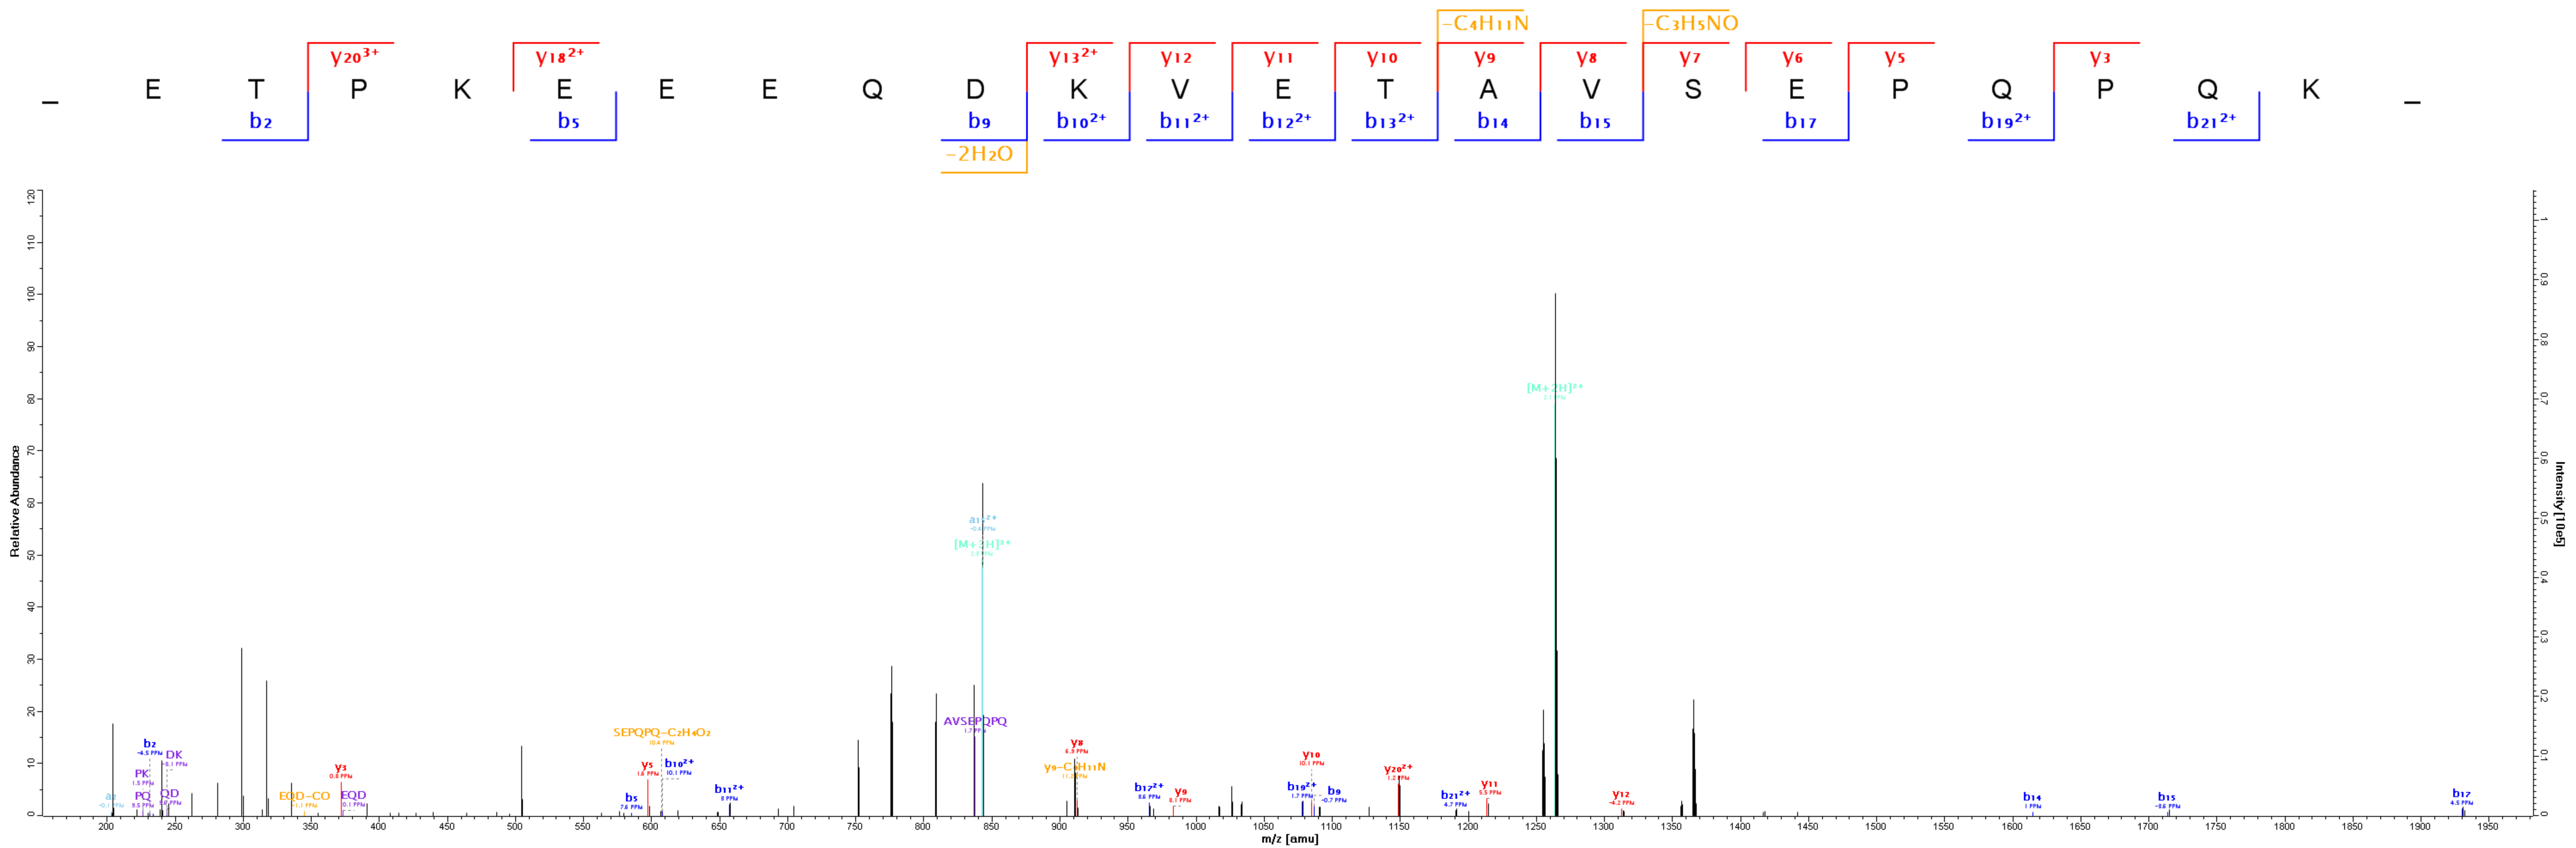

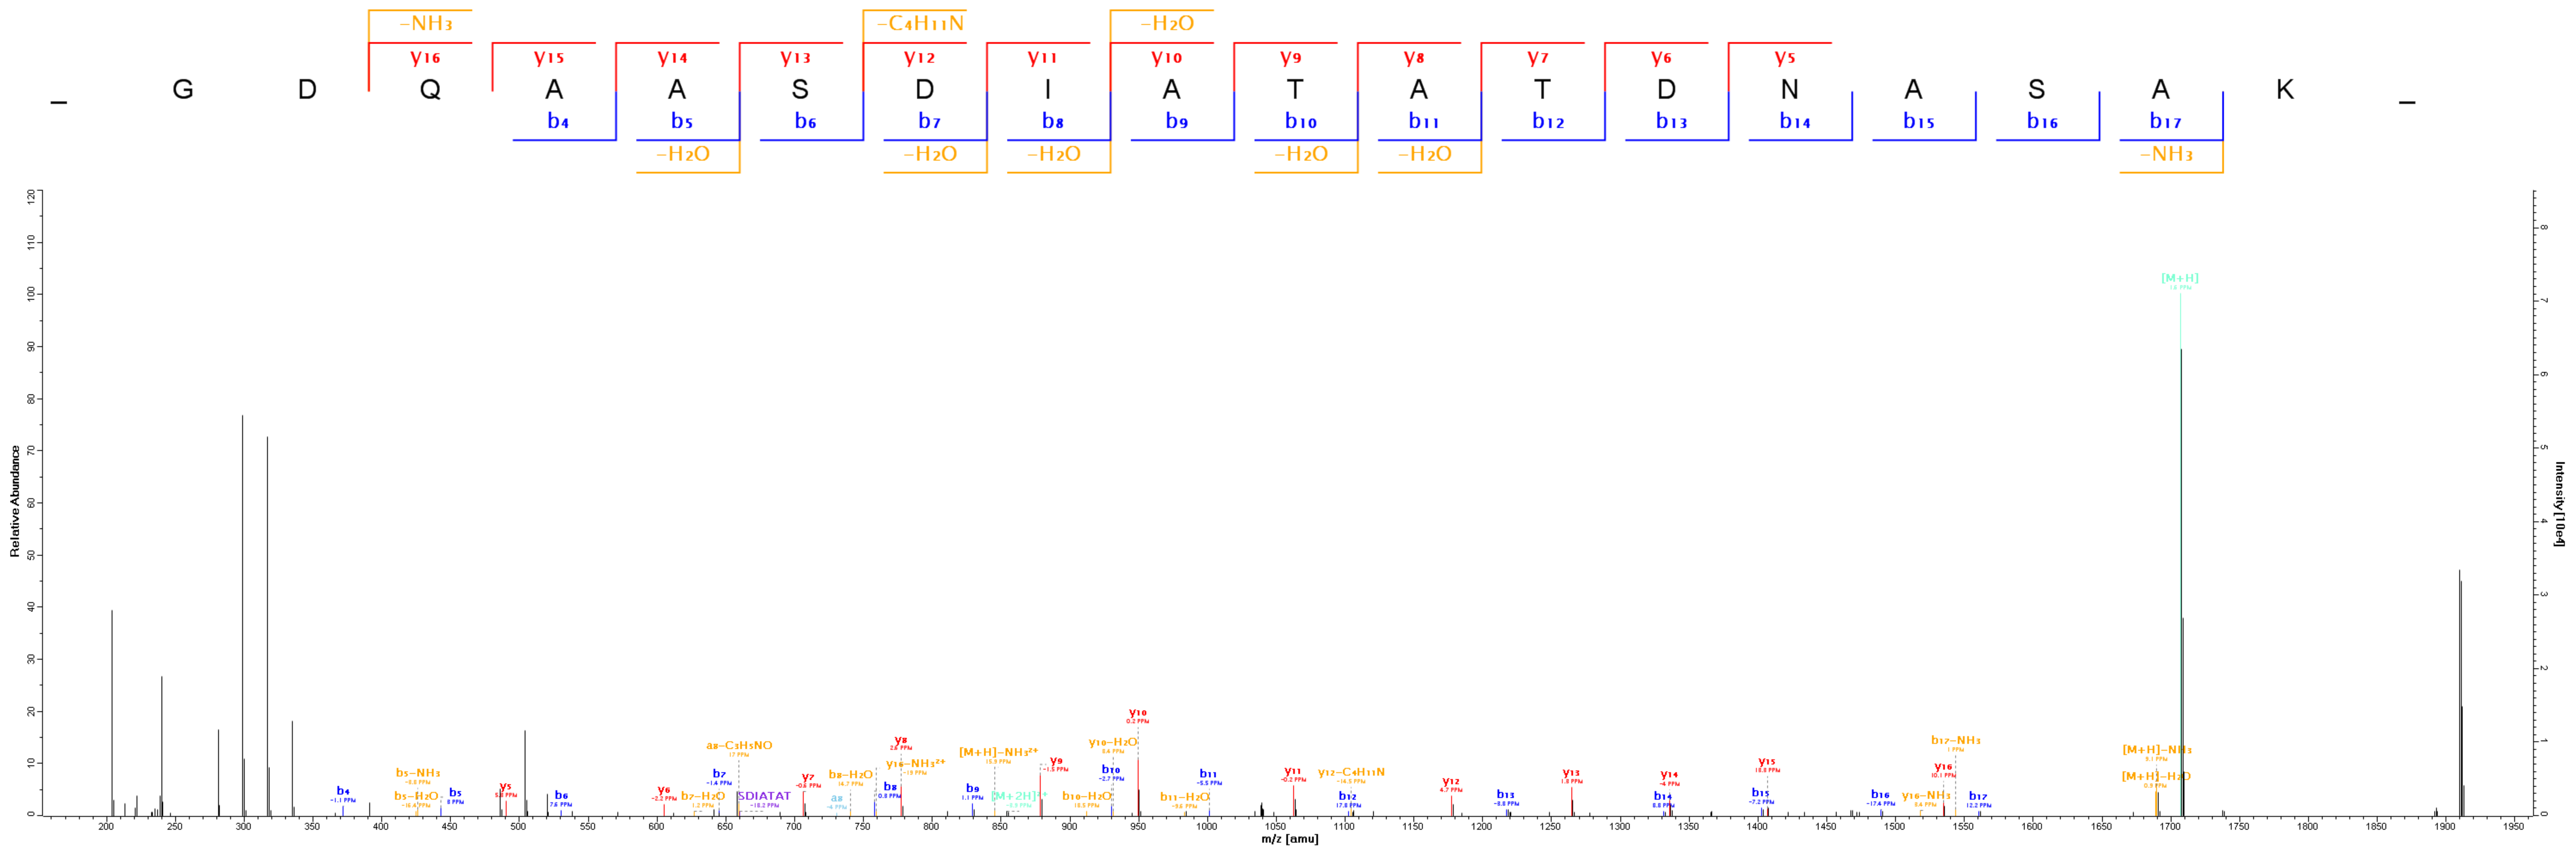

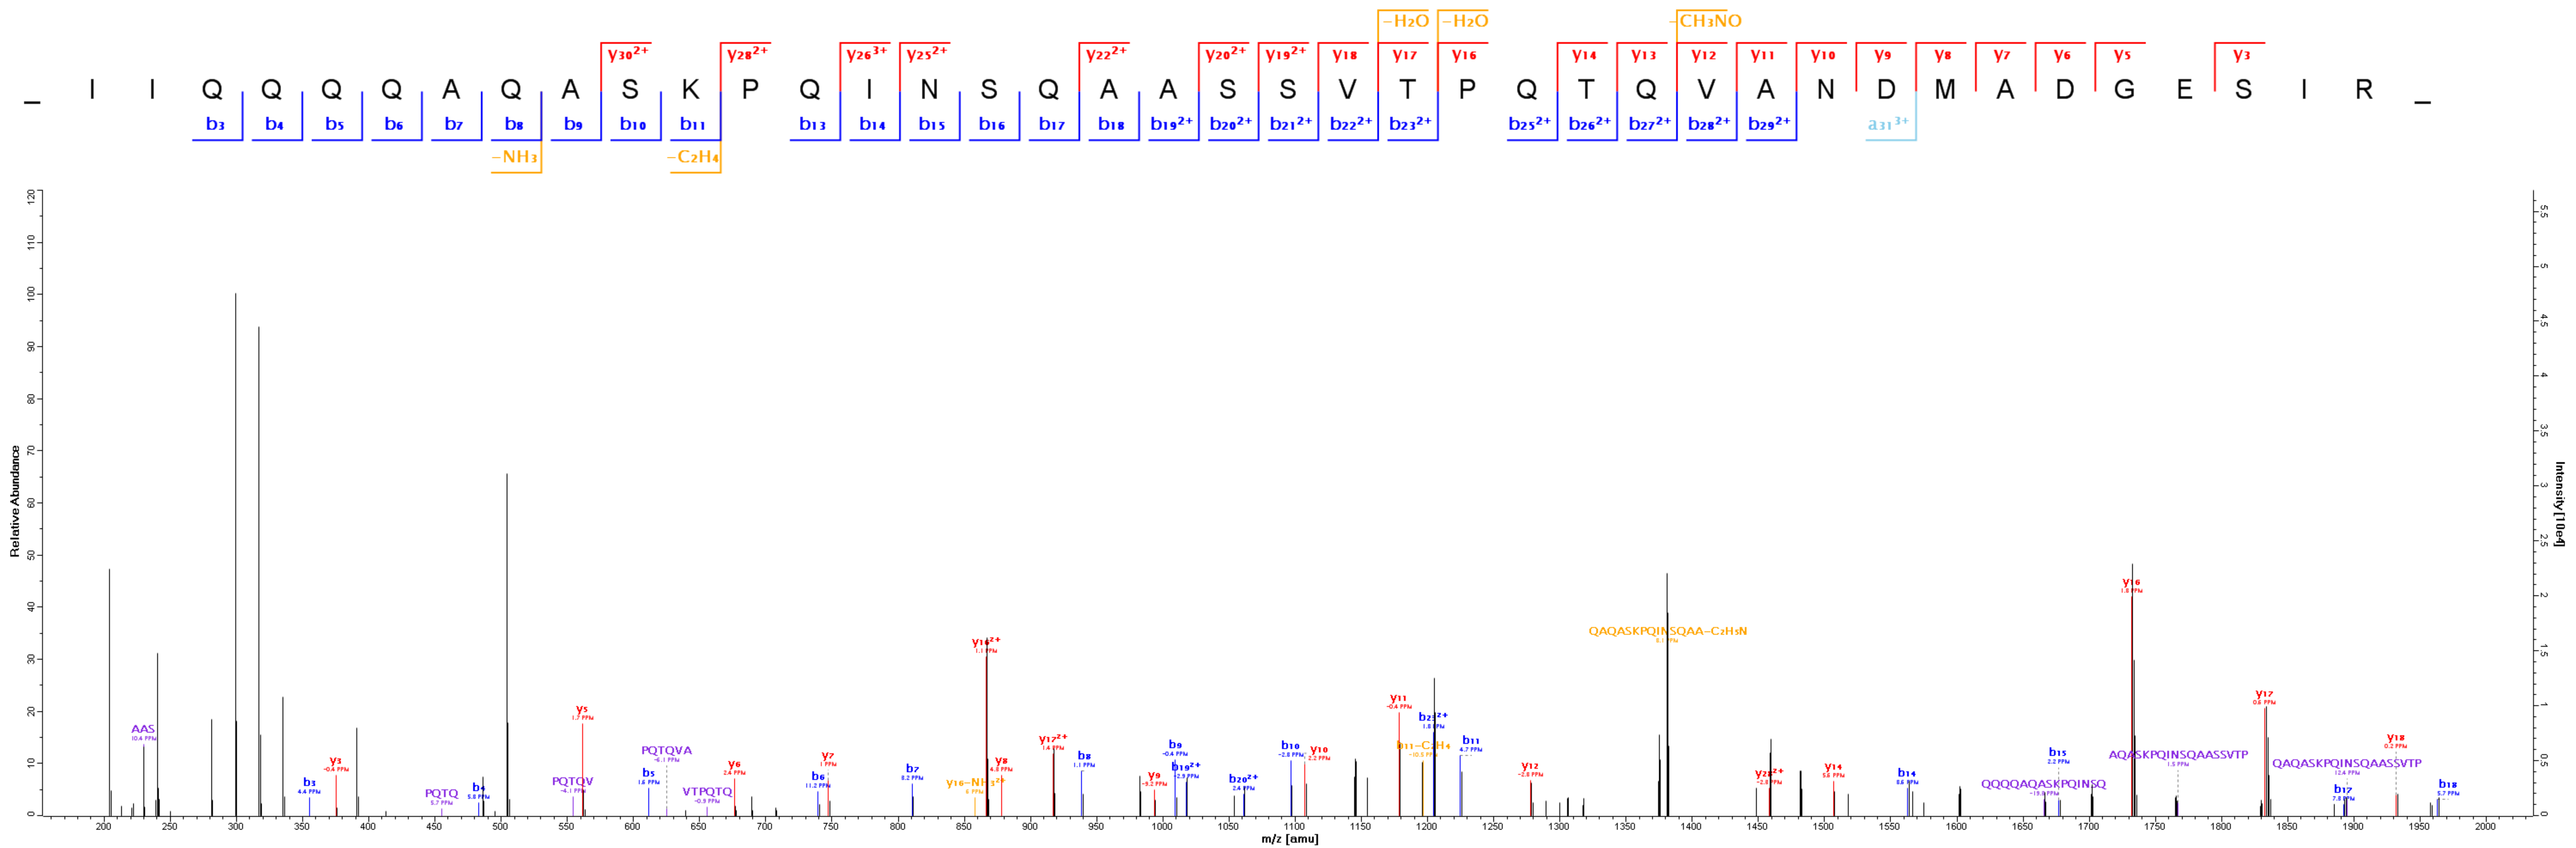

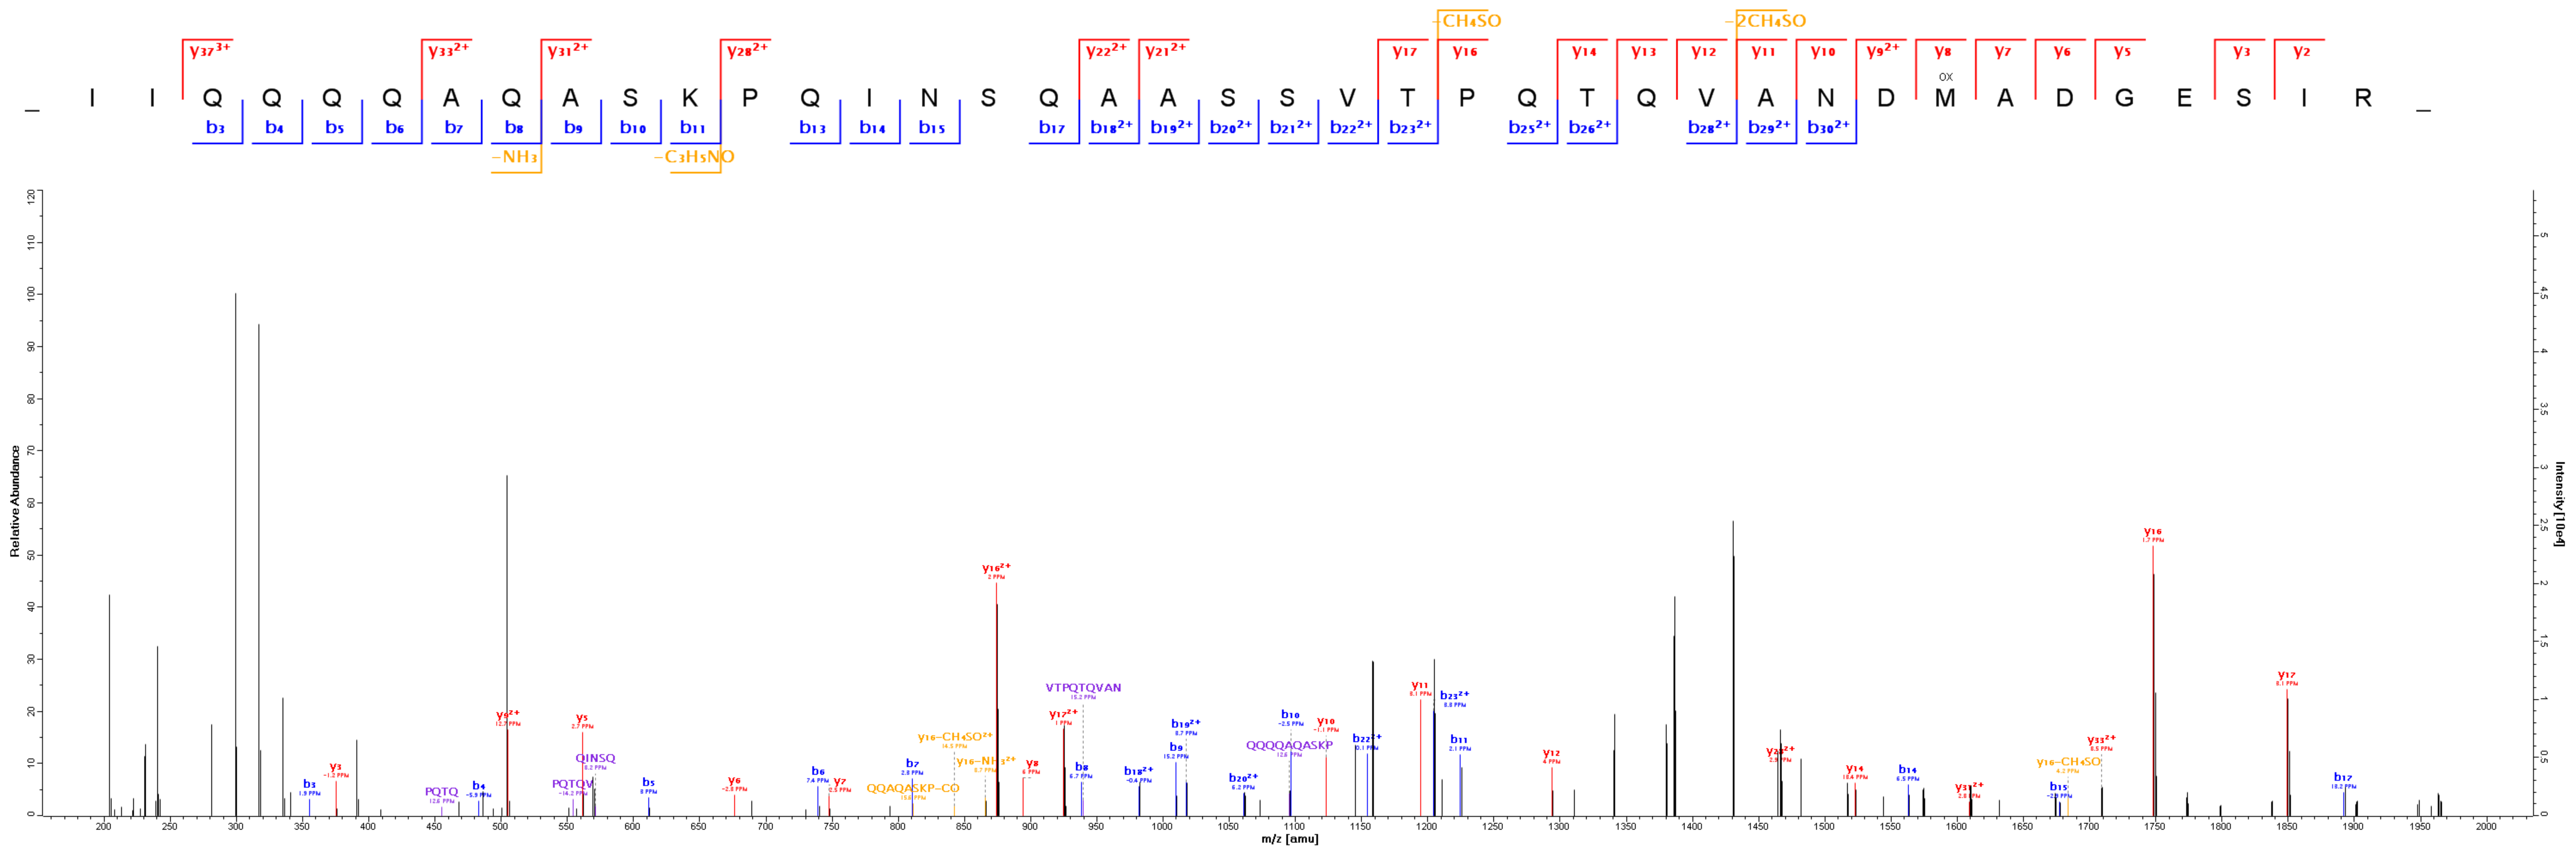

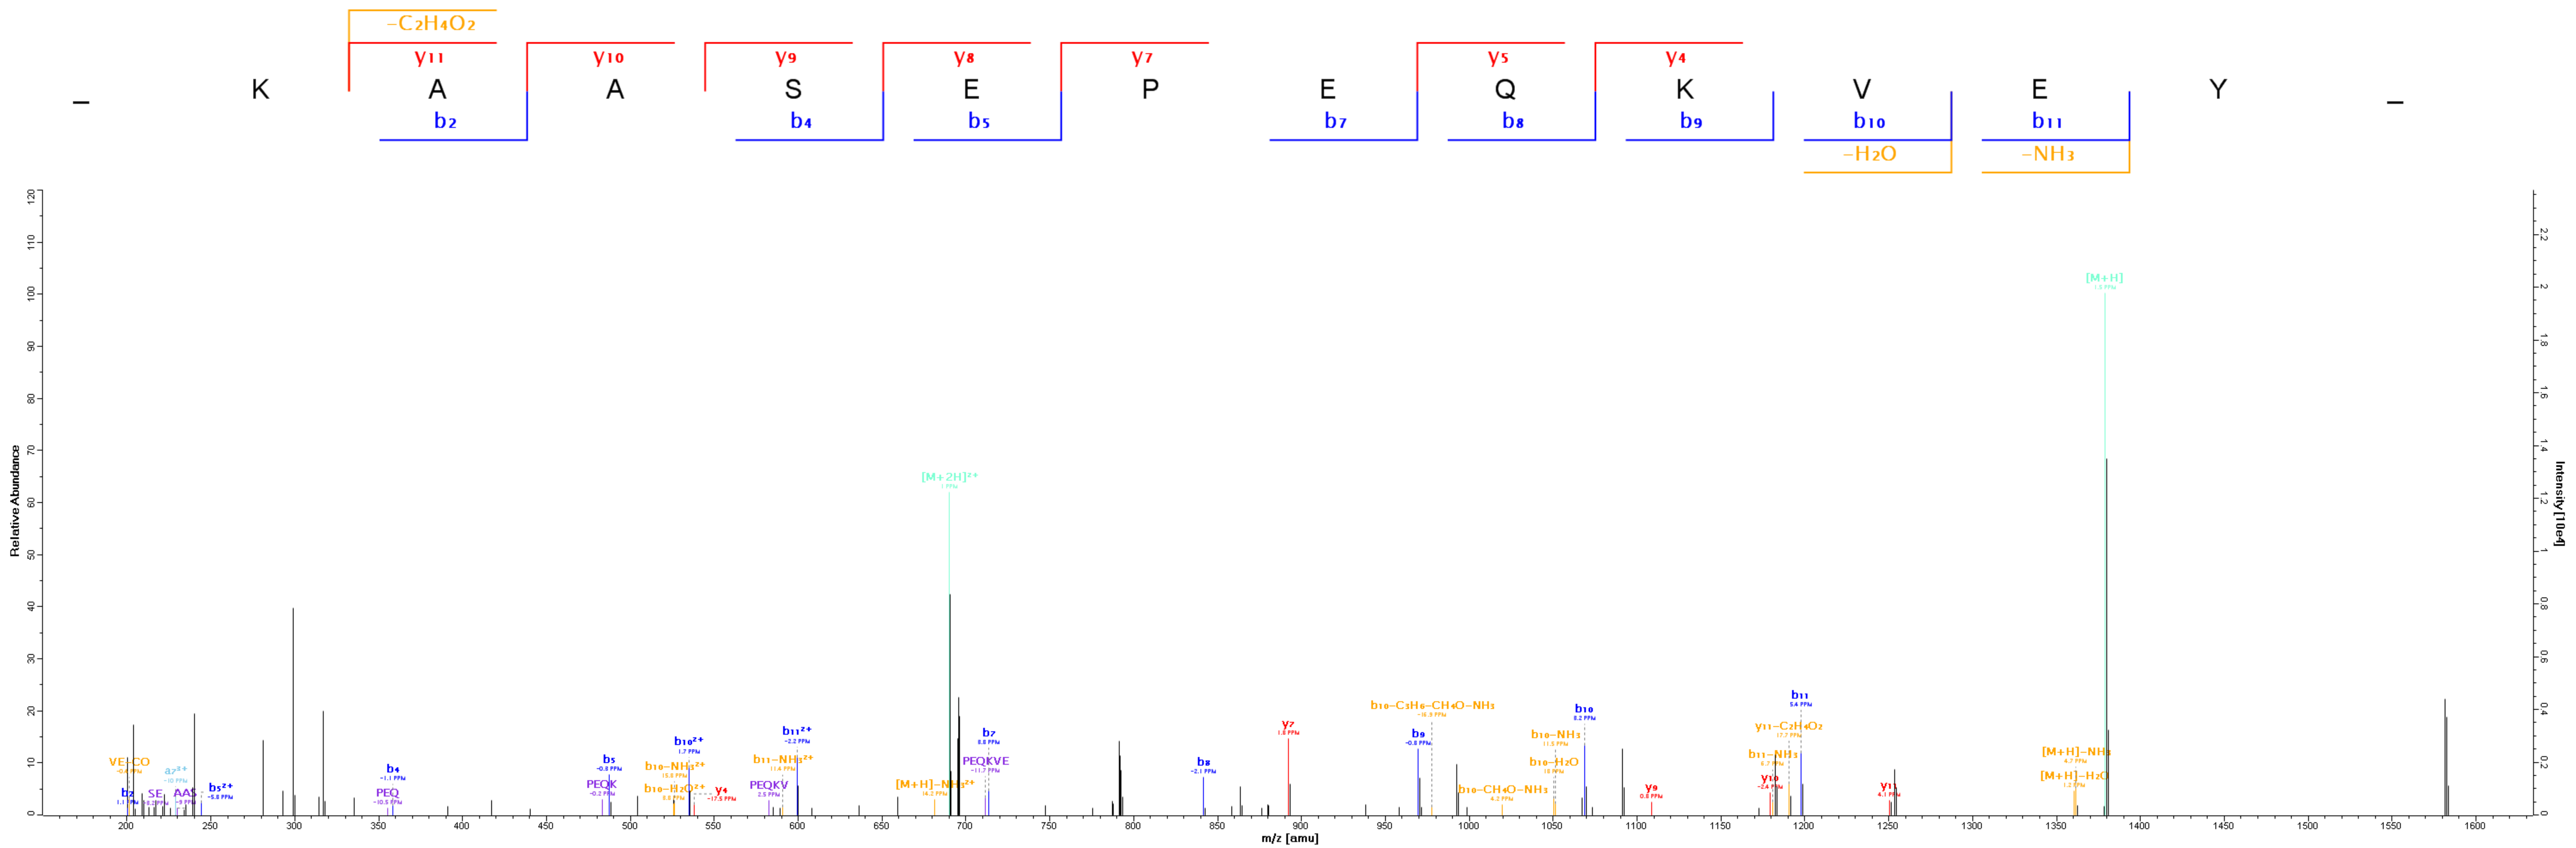

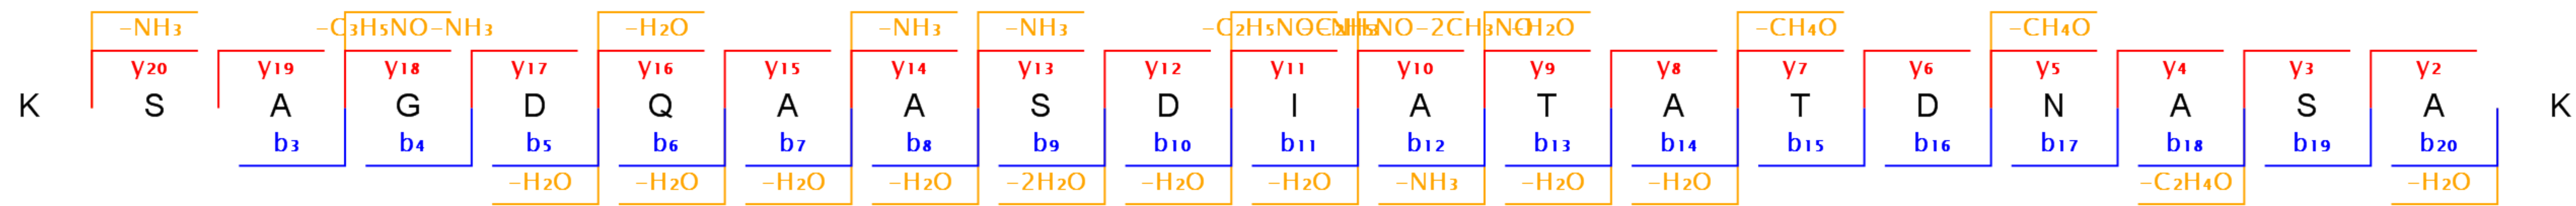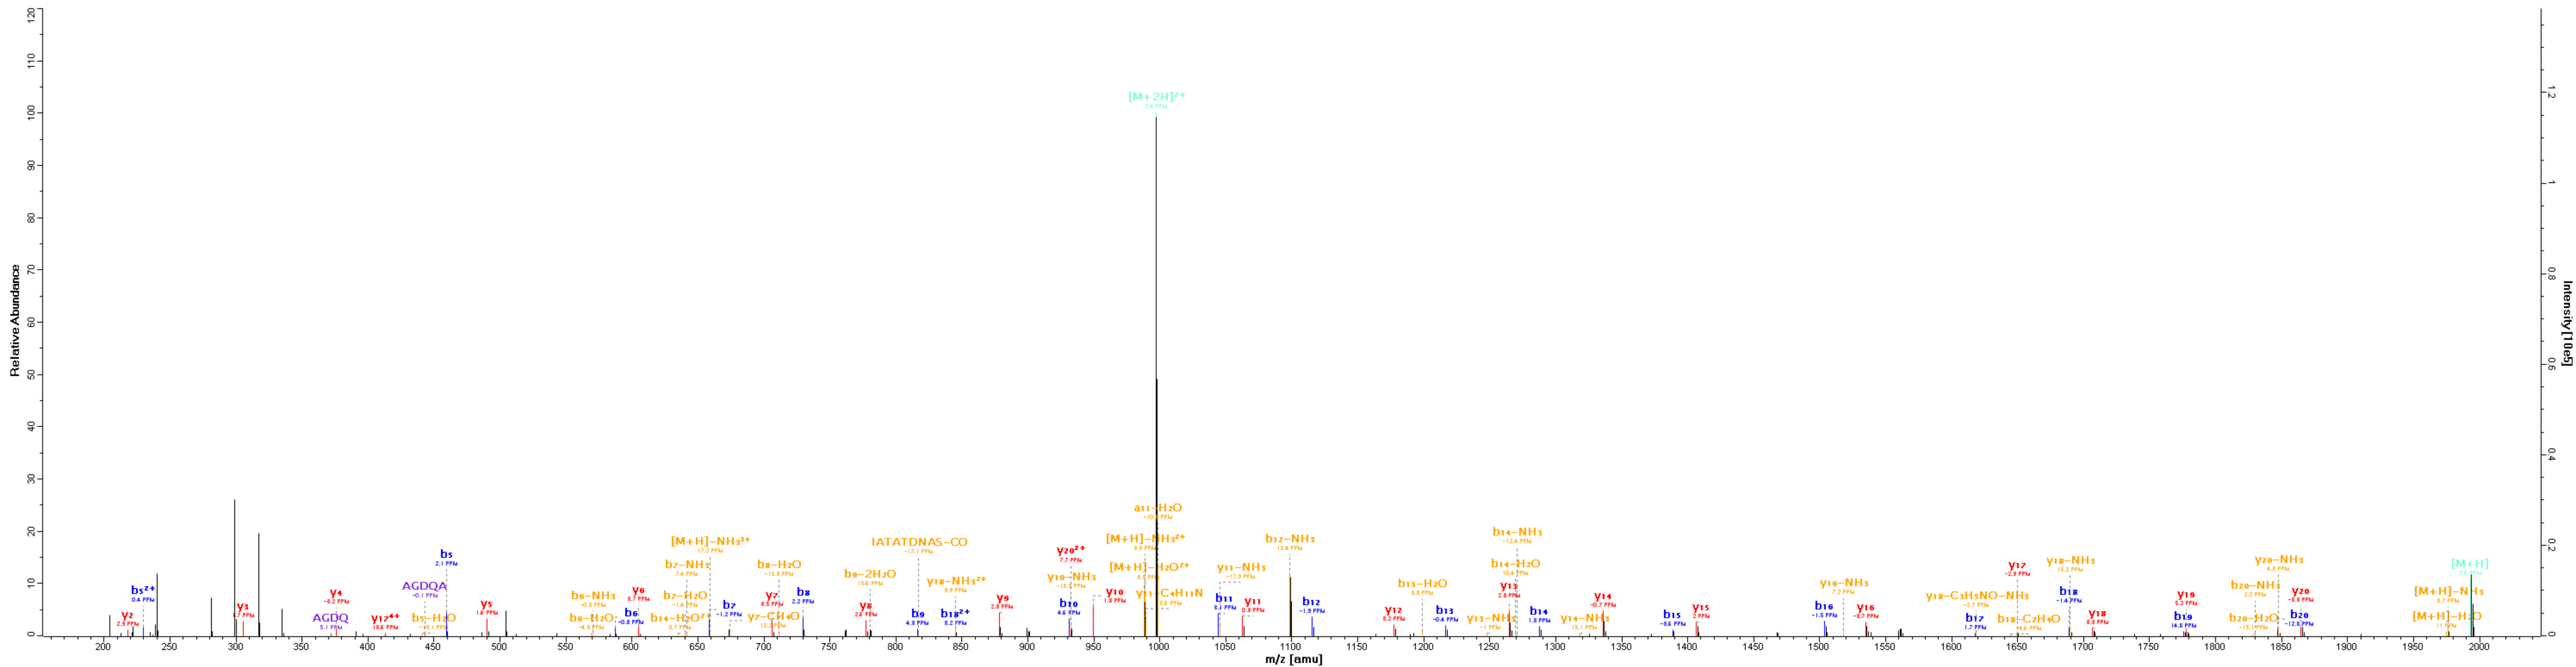



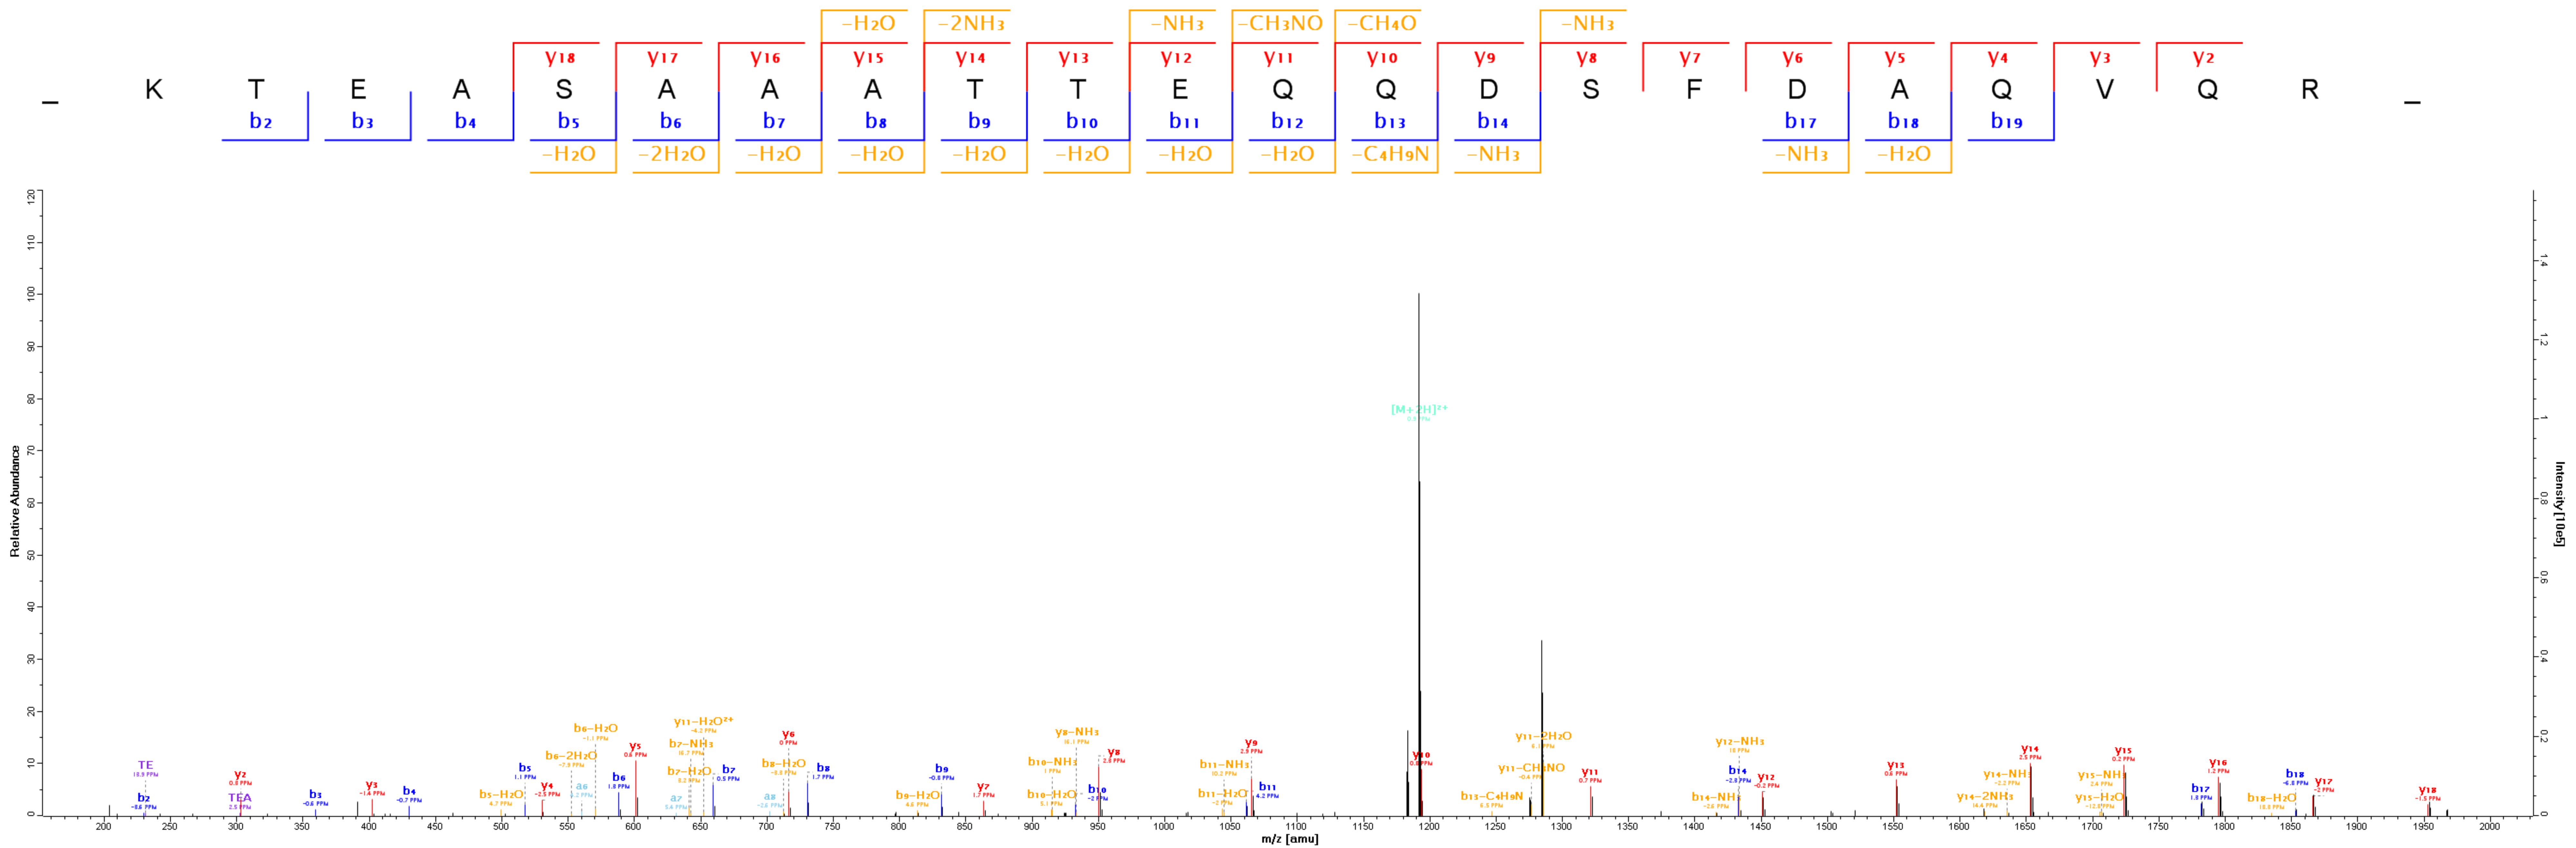

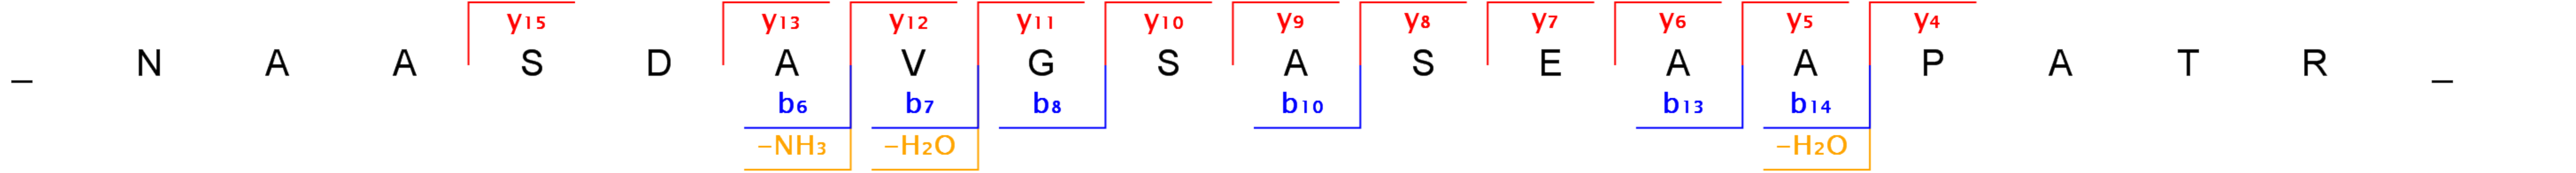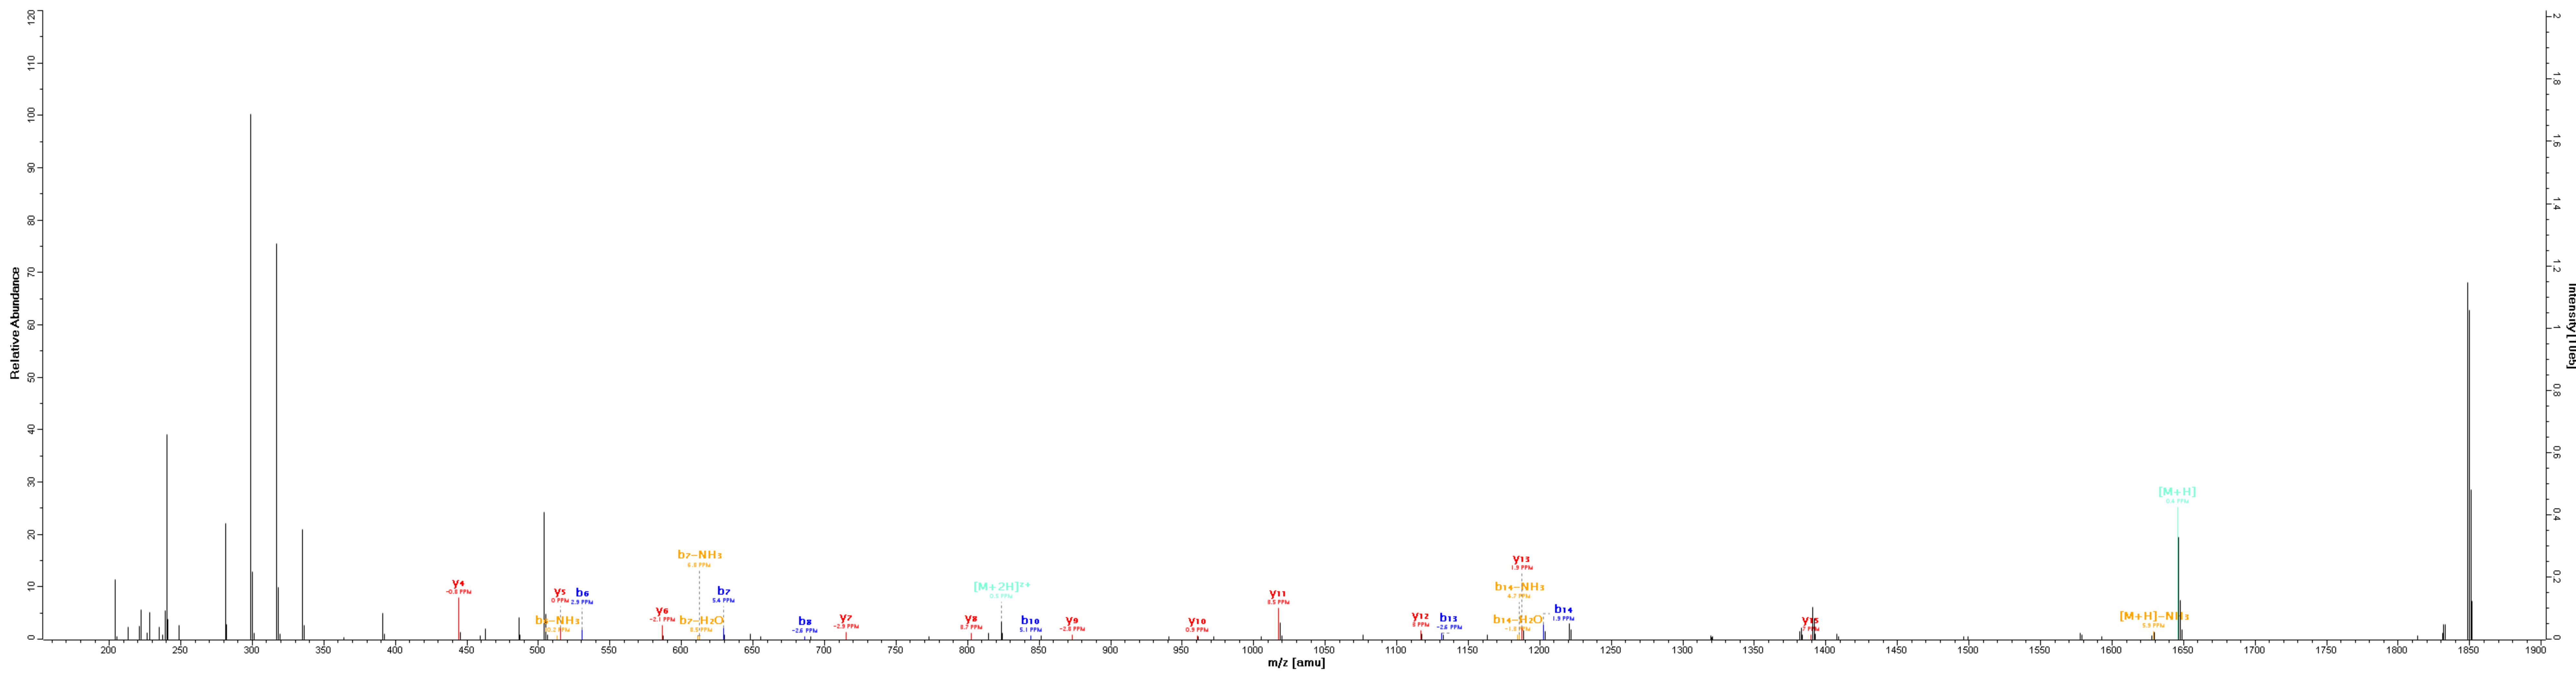

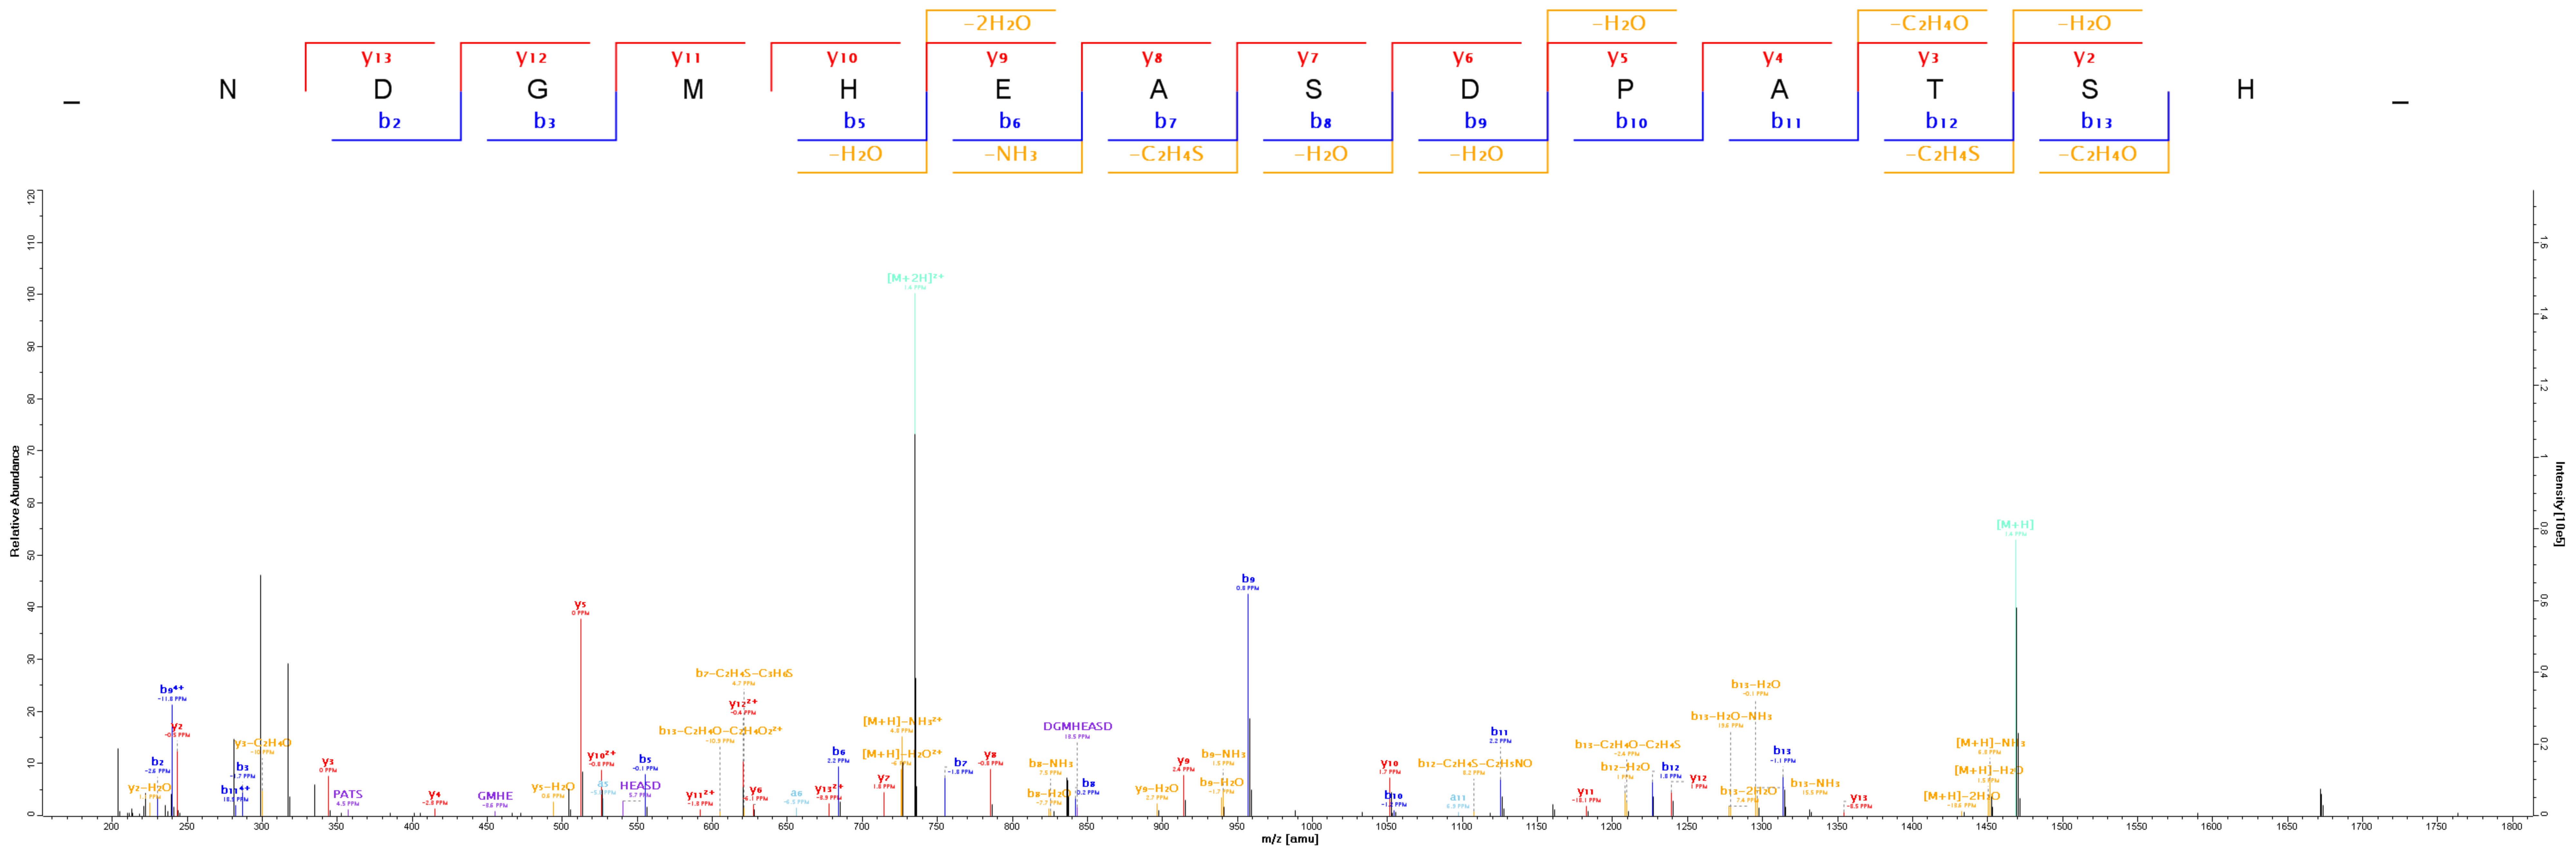

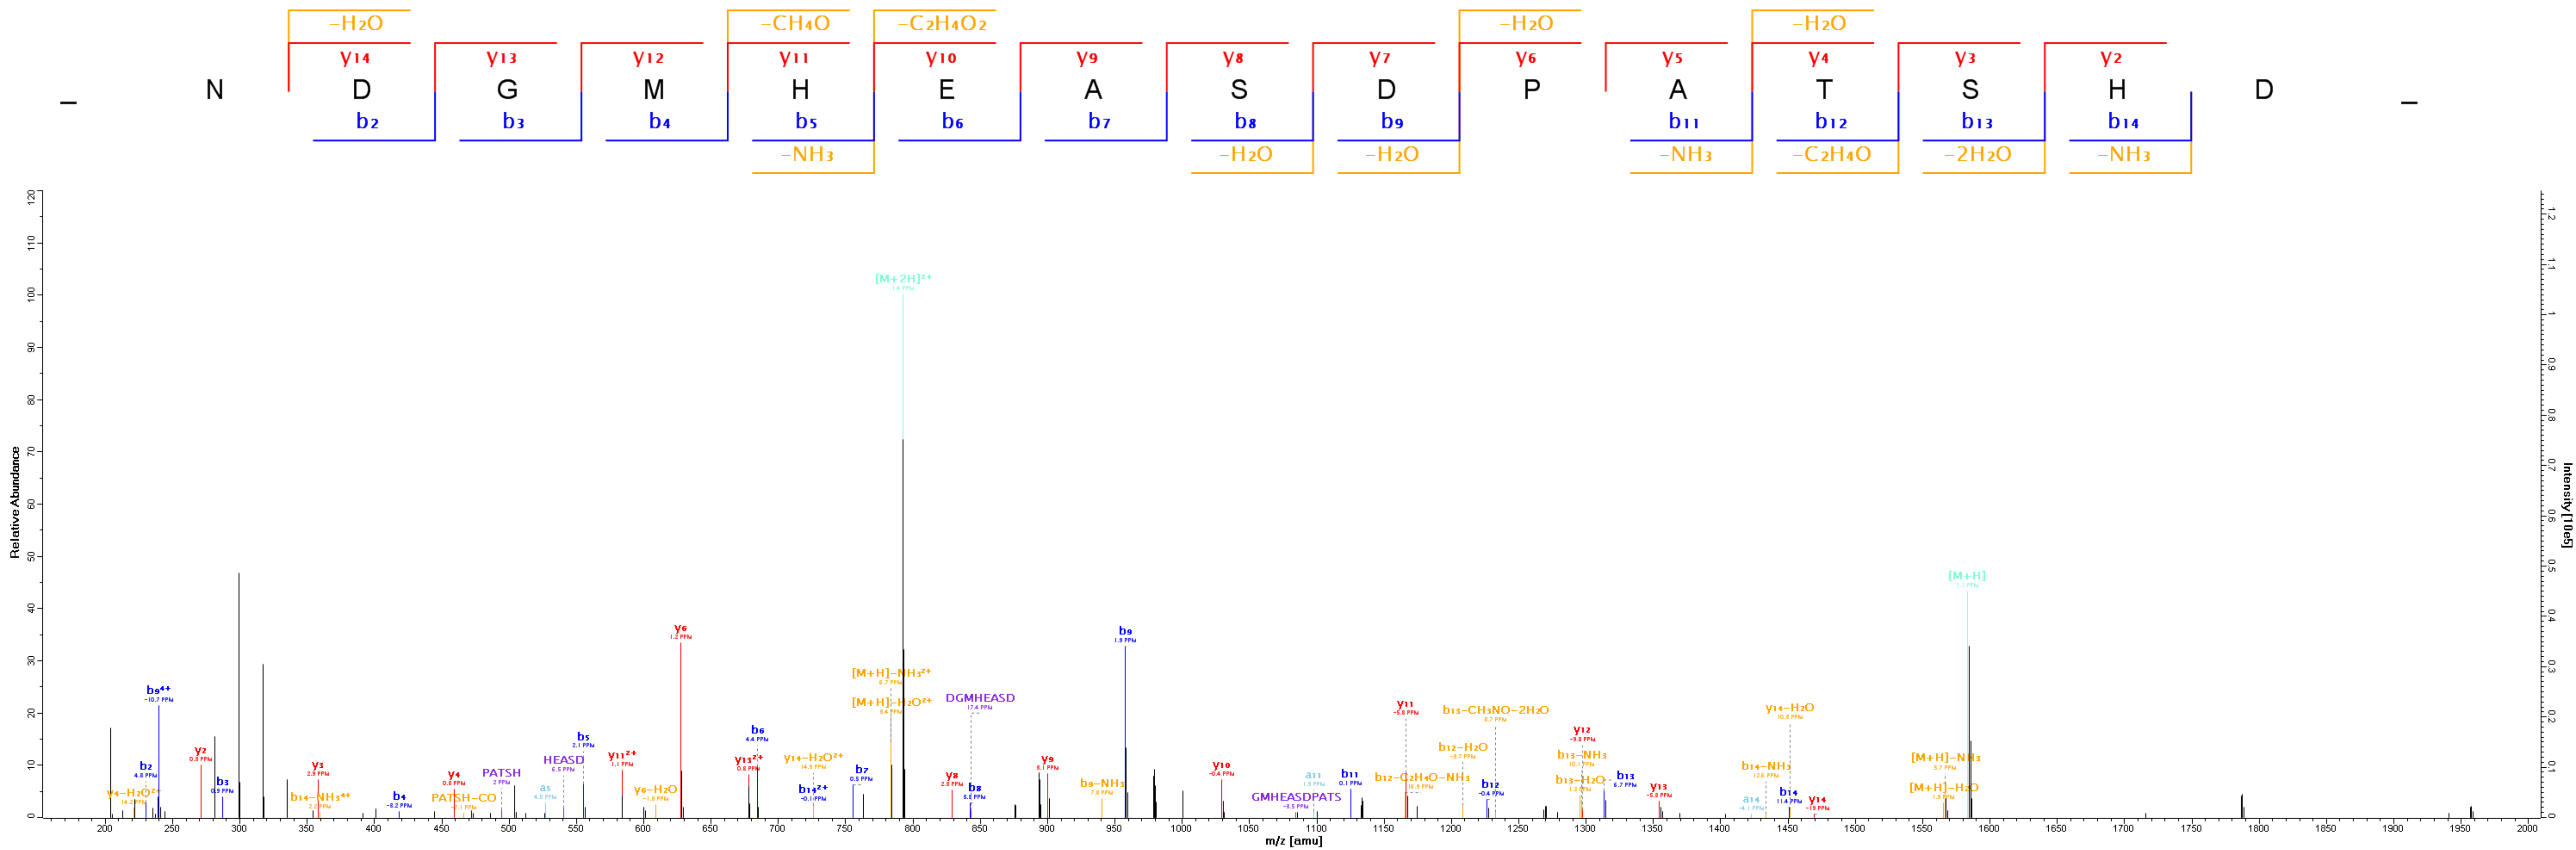

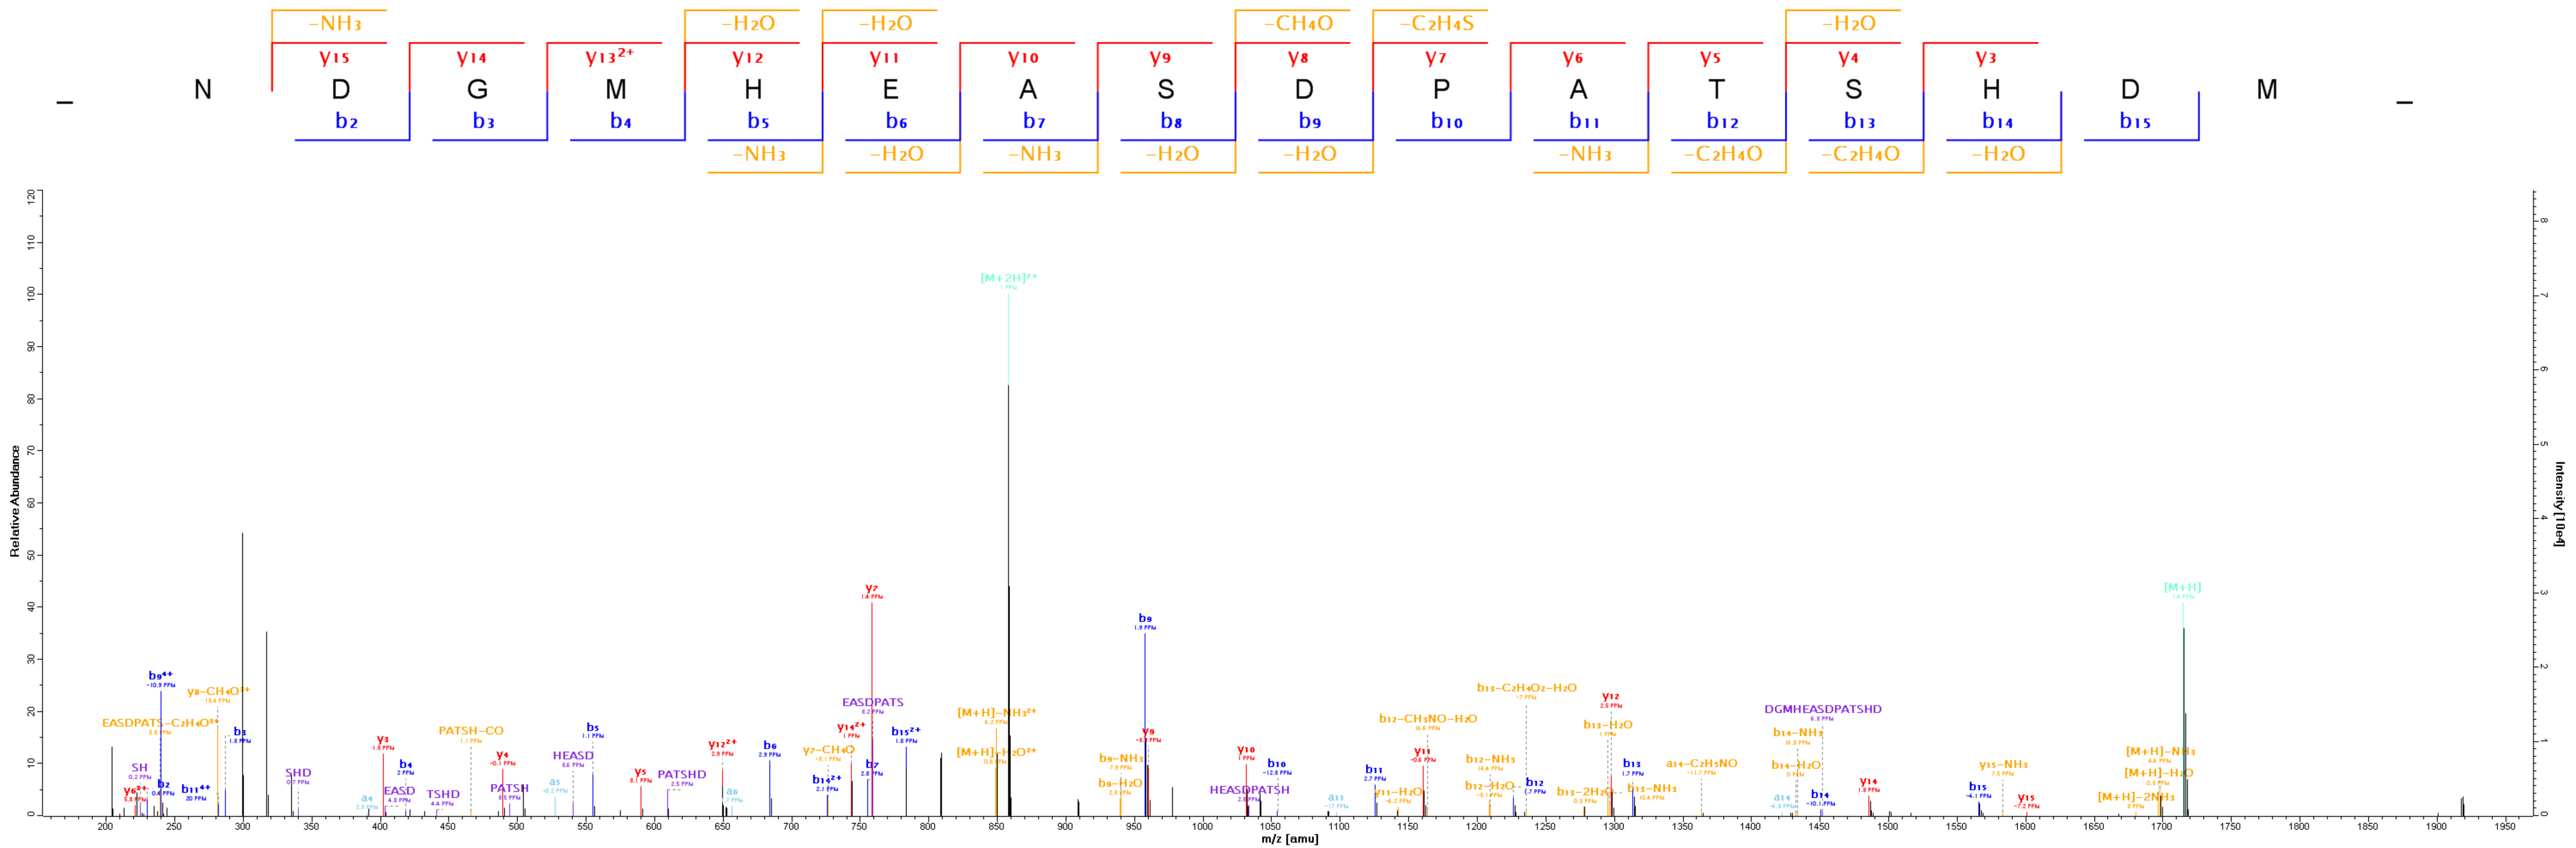

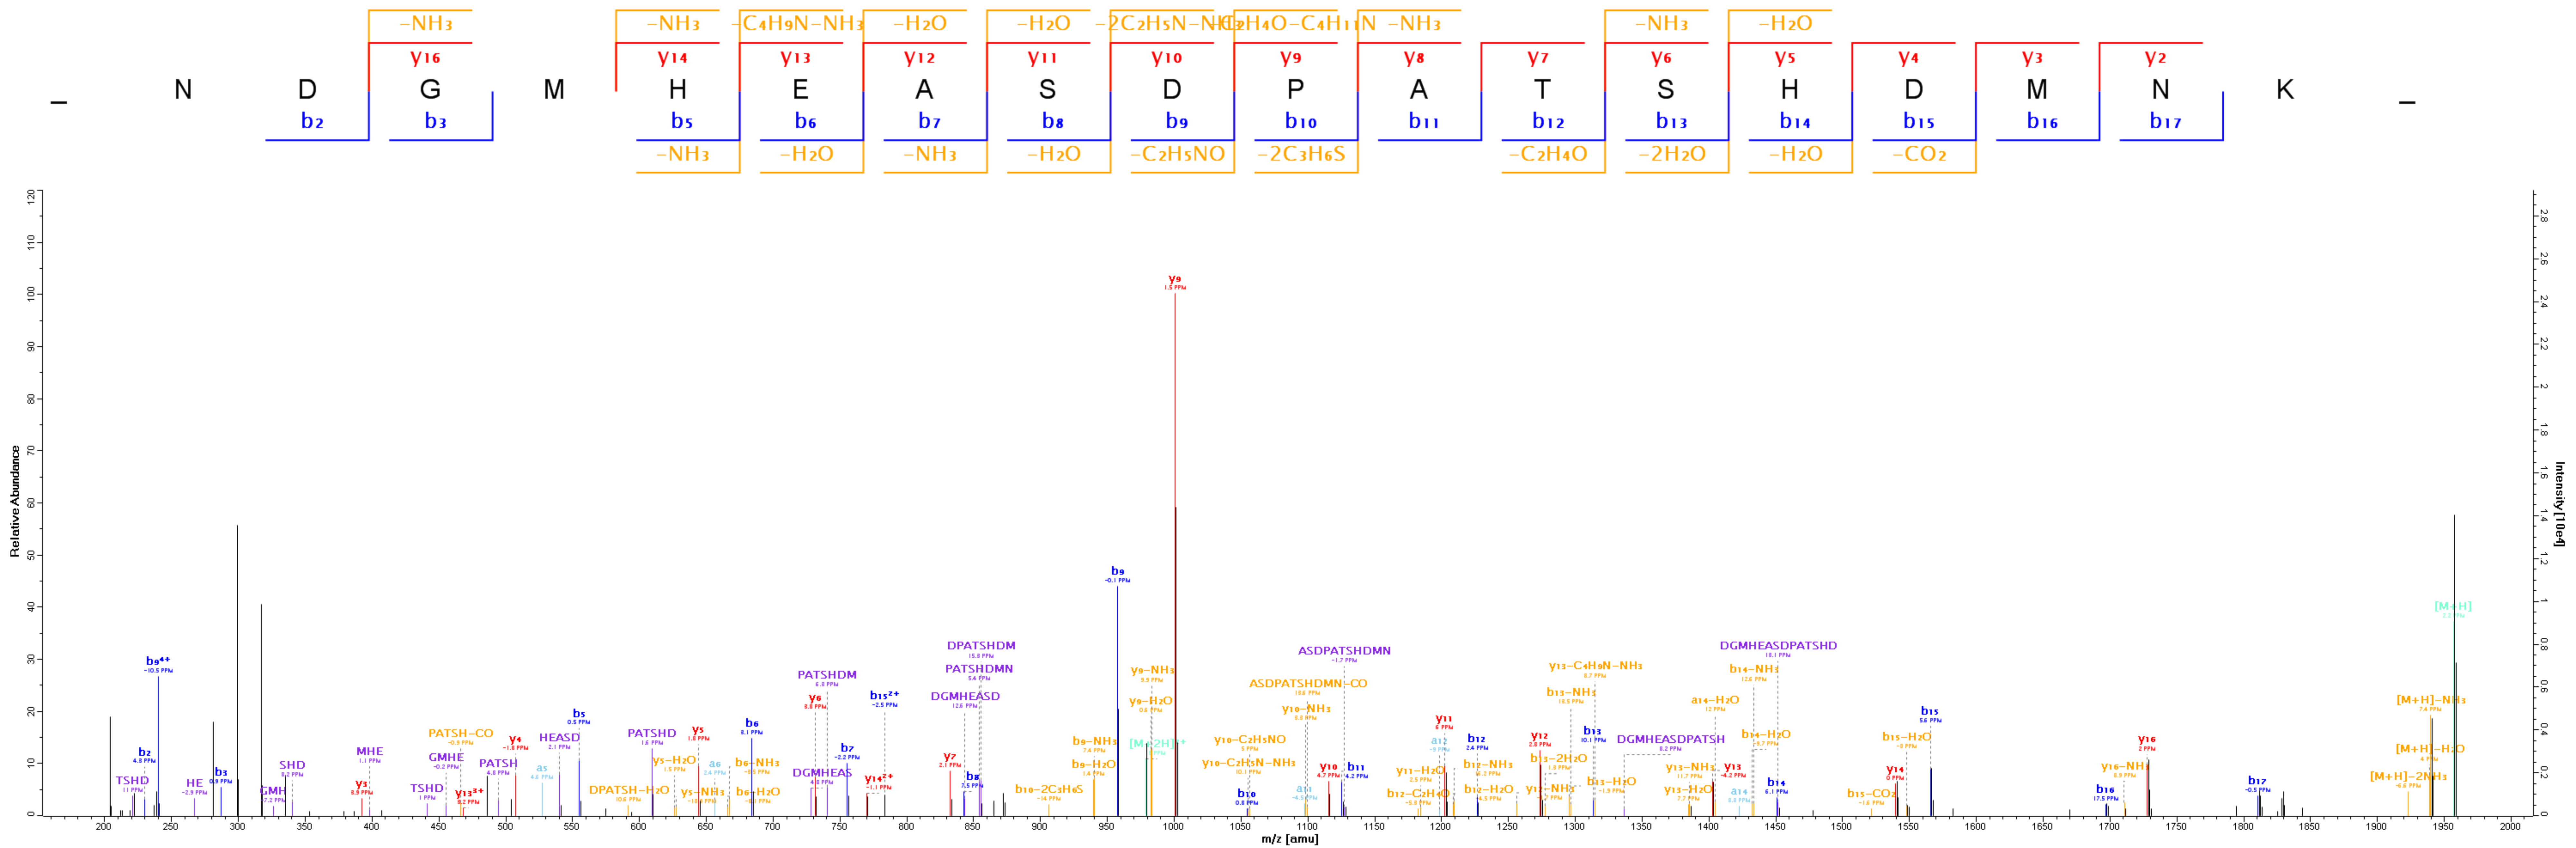

de N

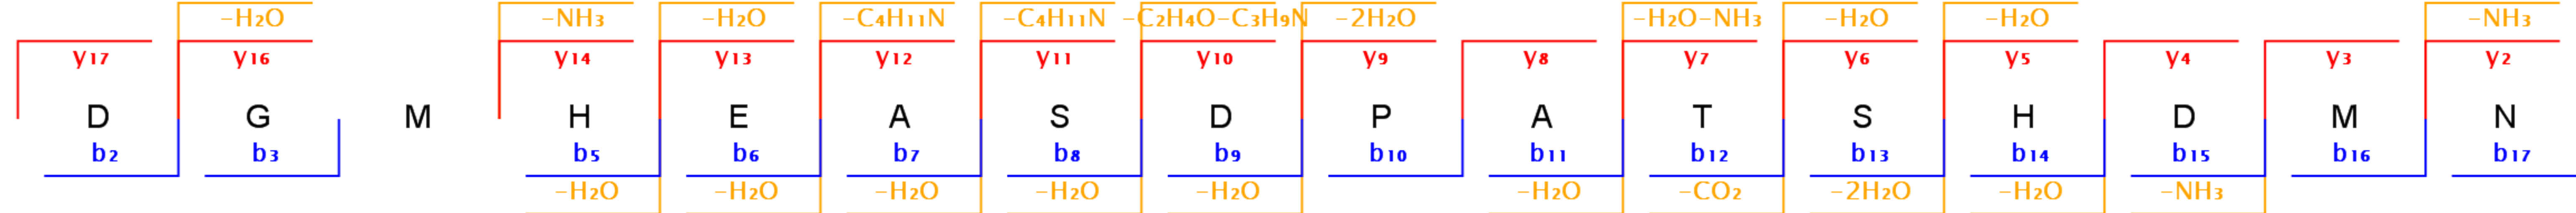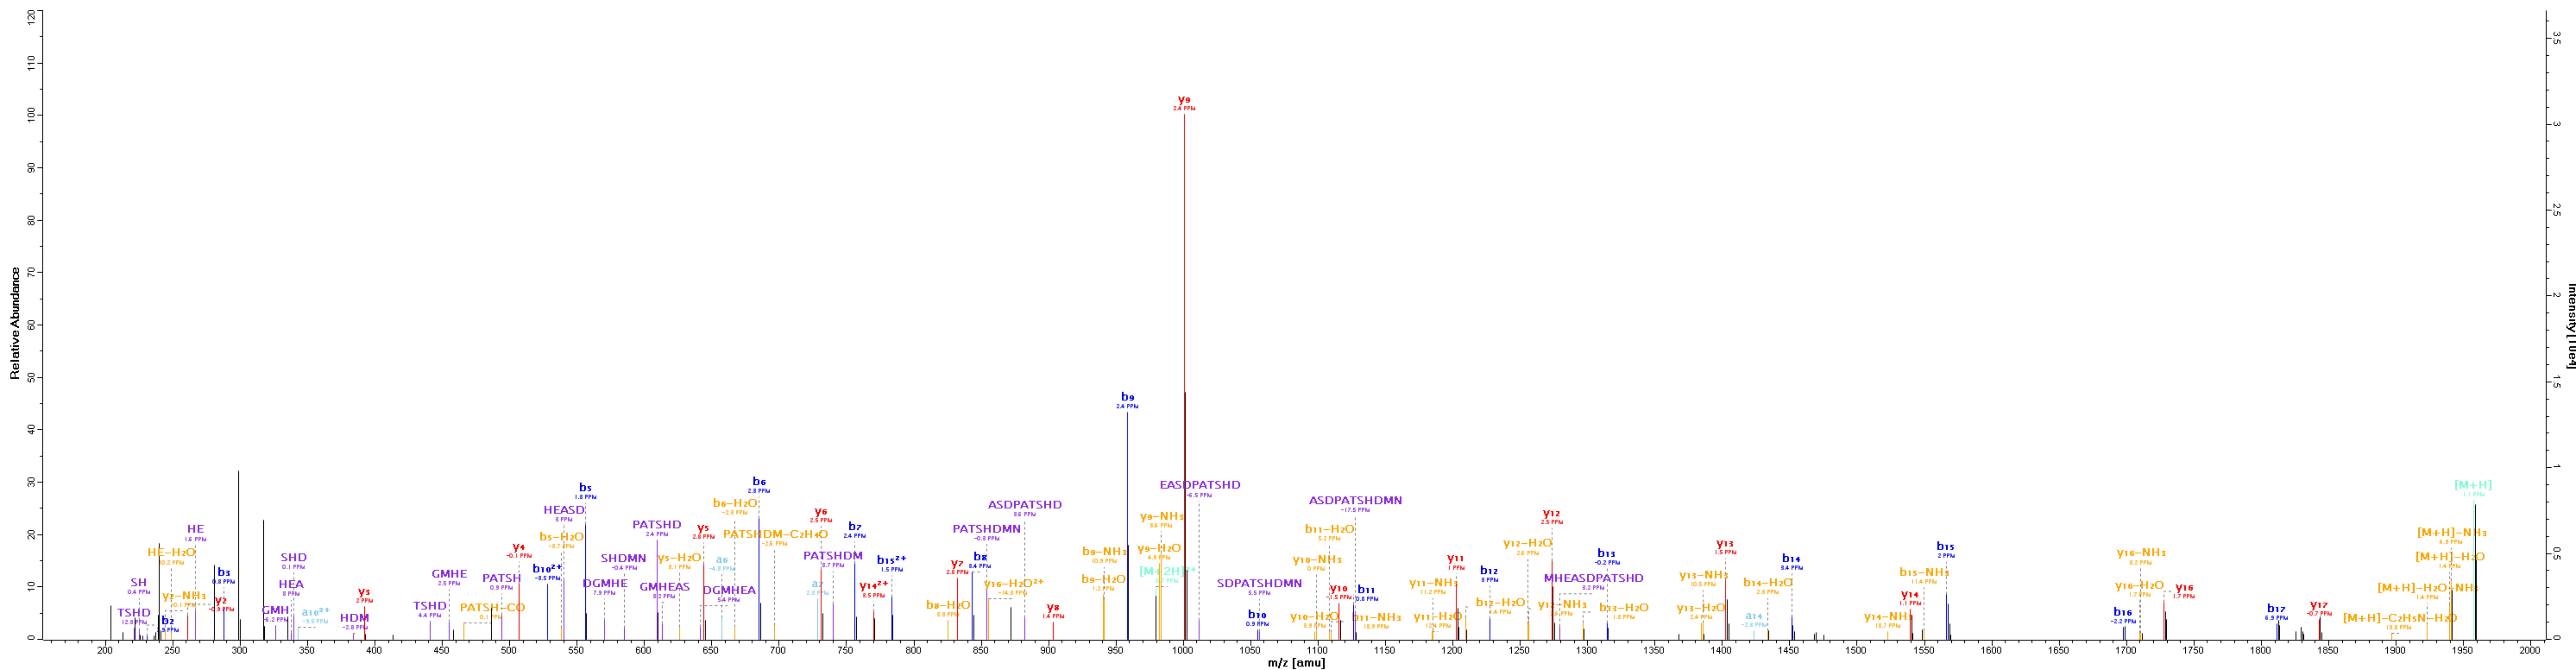



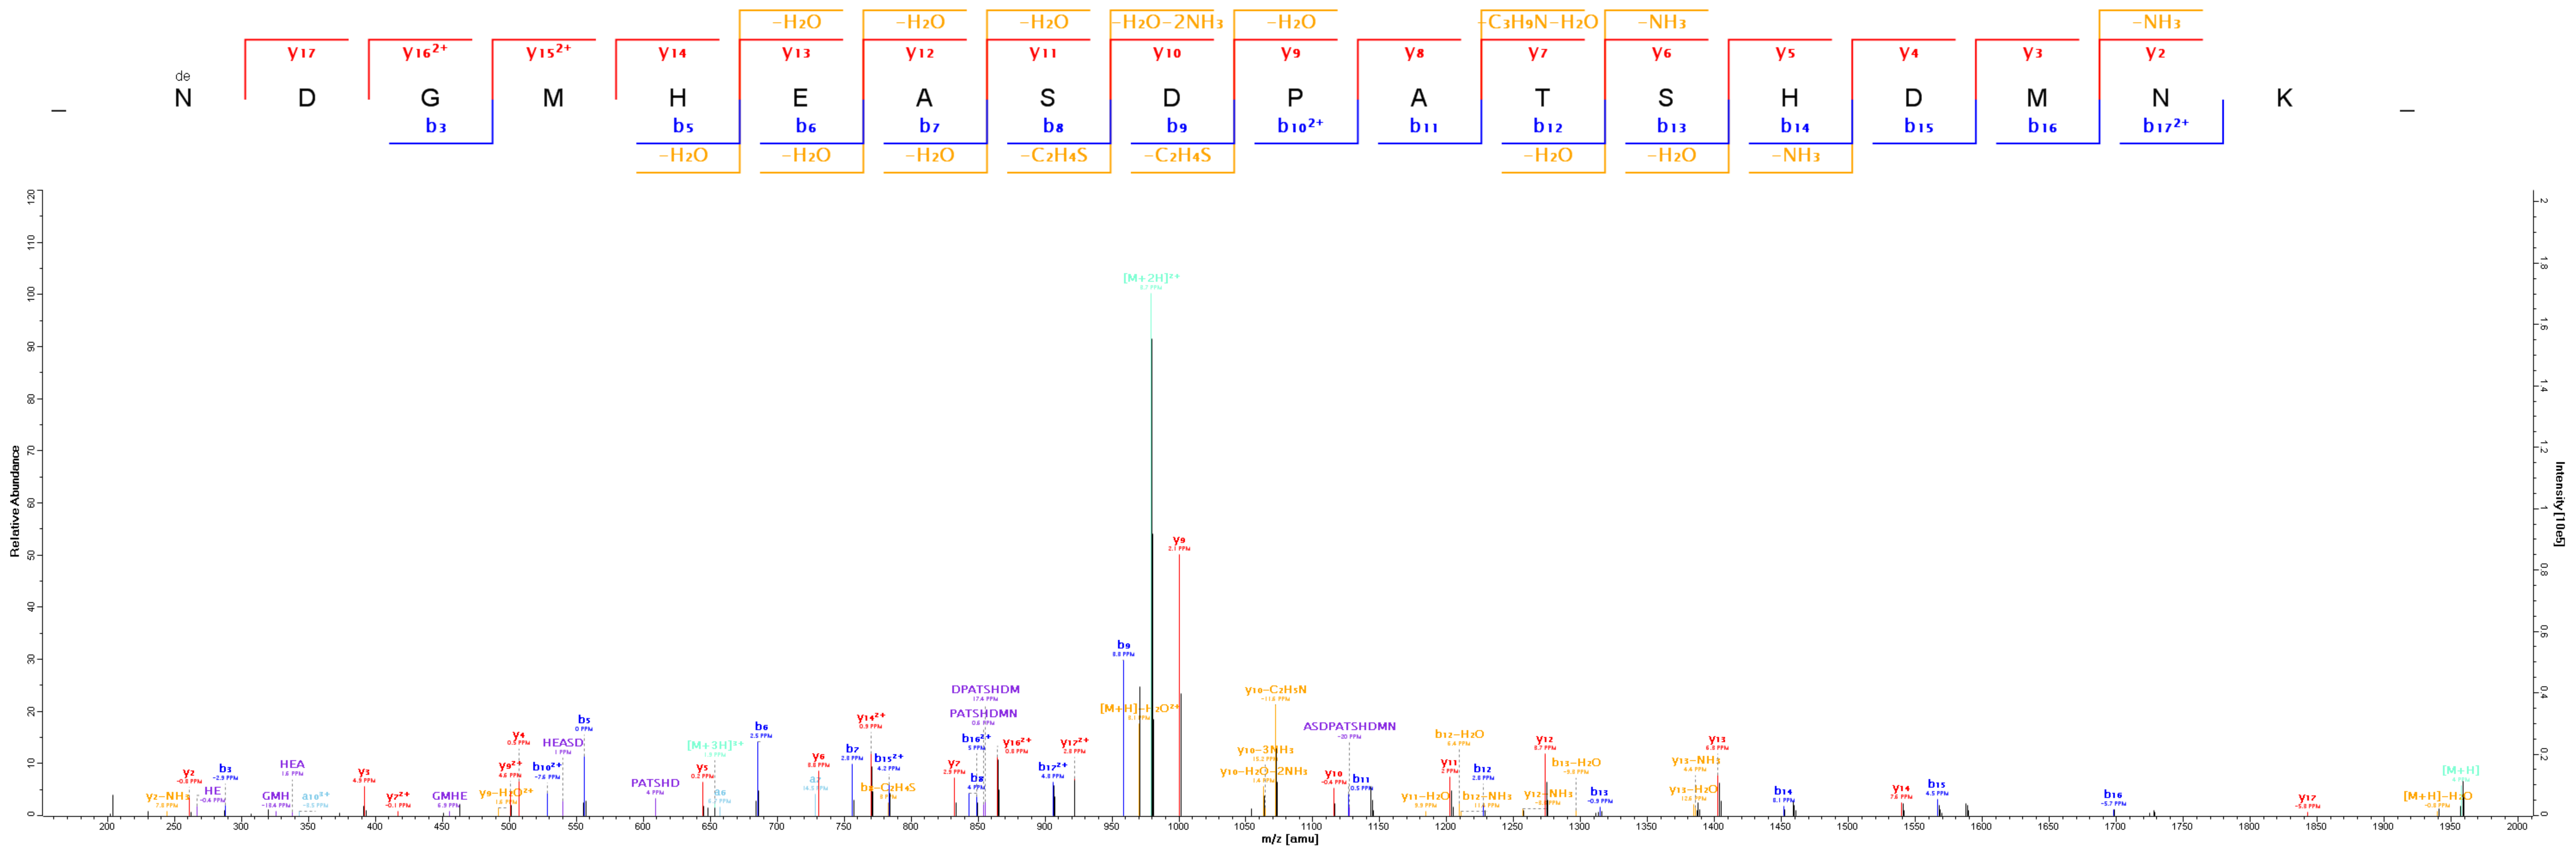



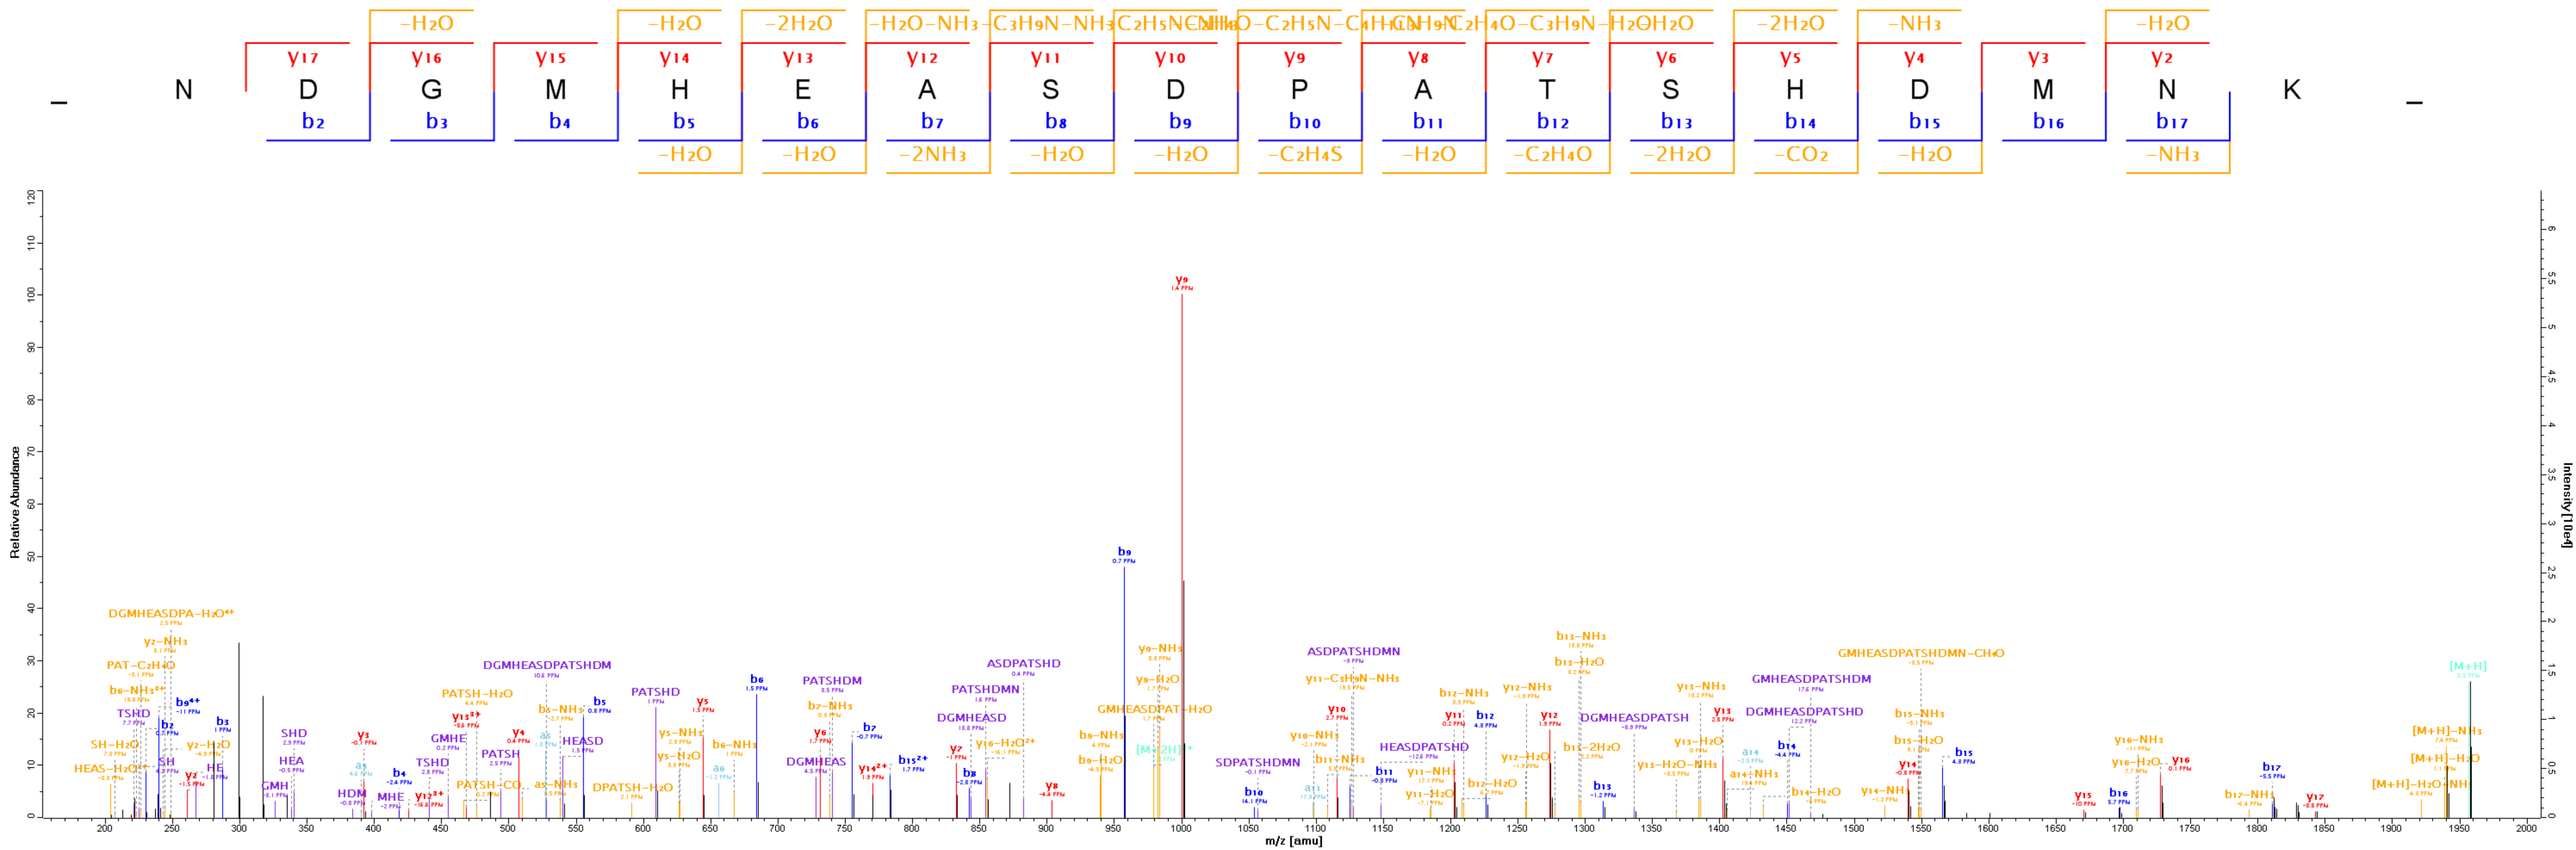

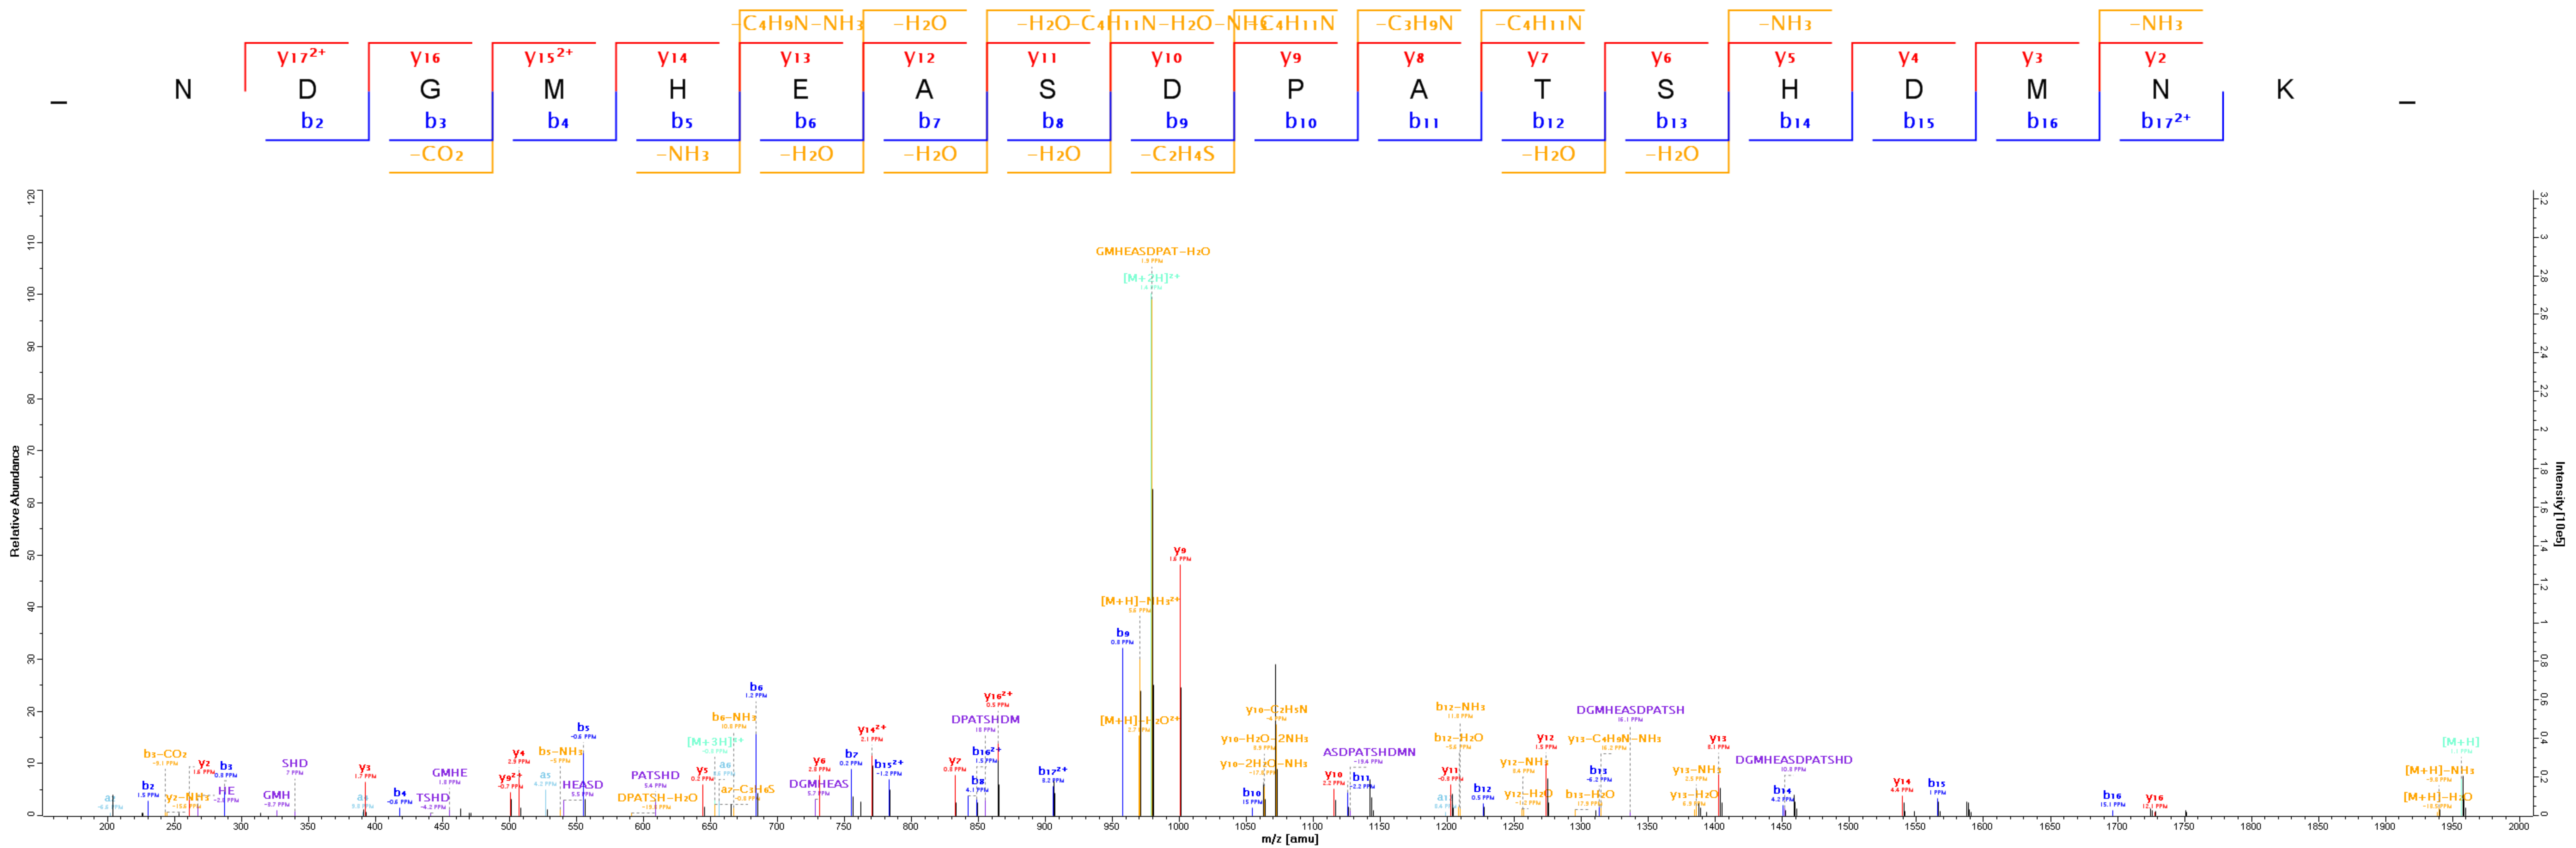

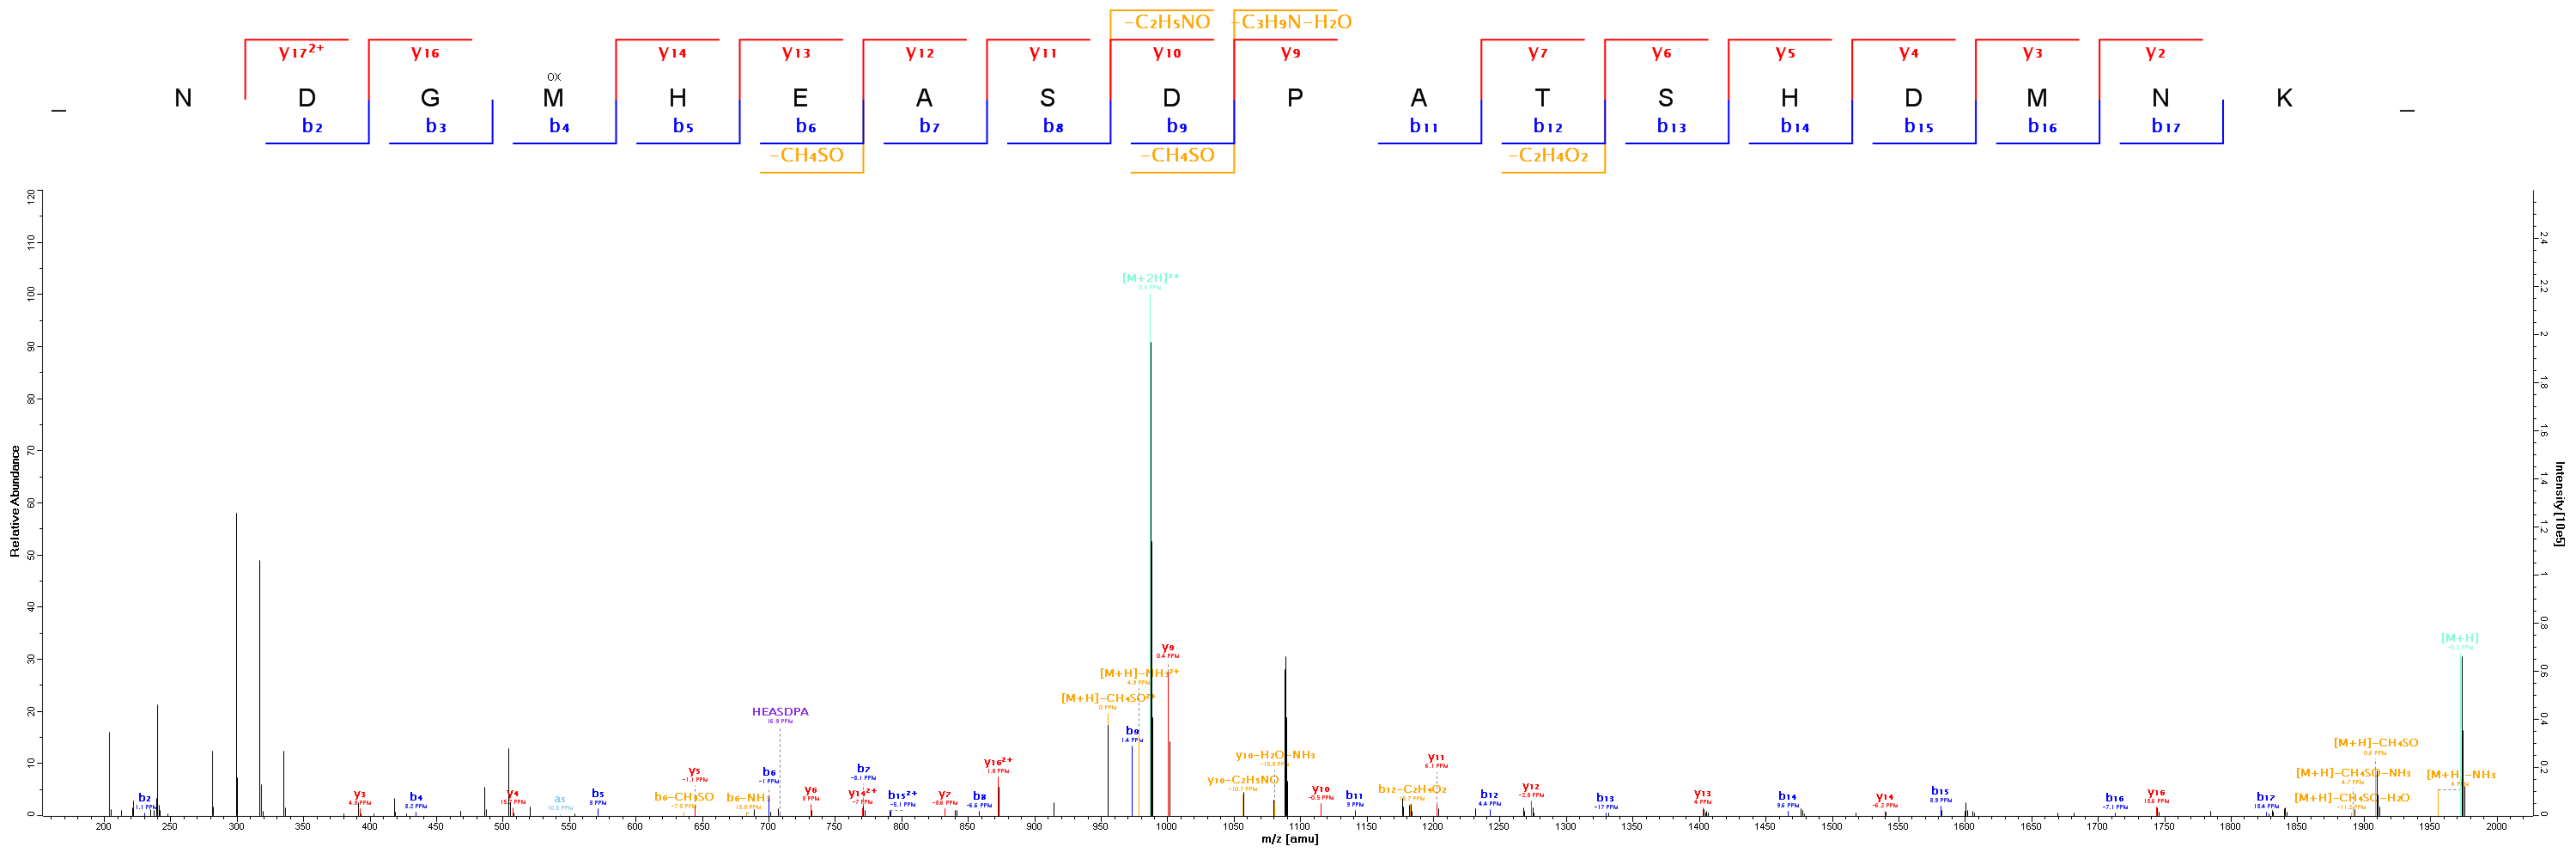

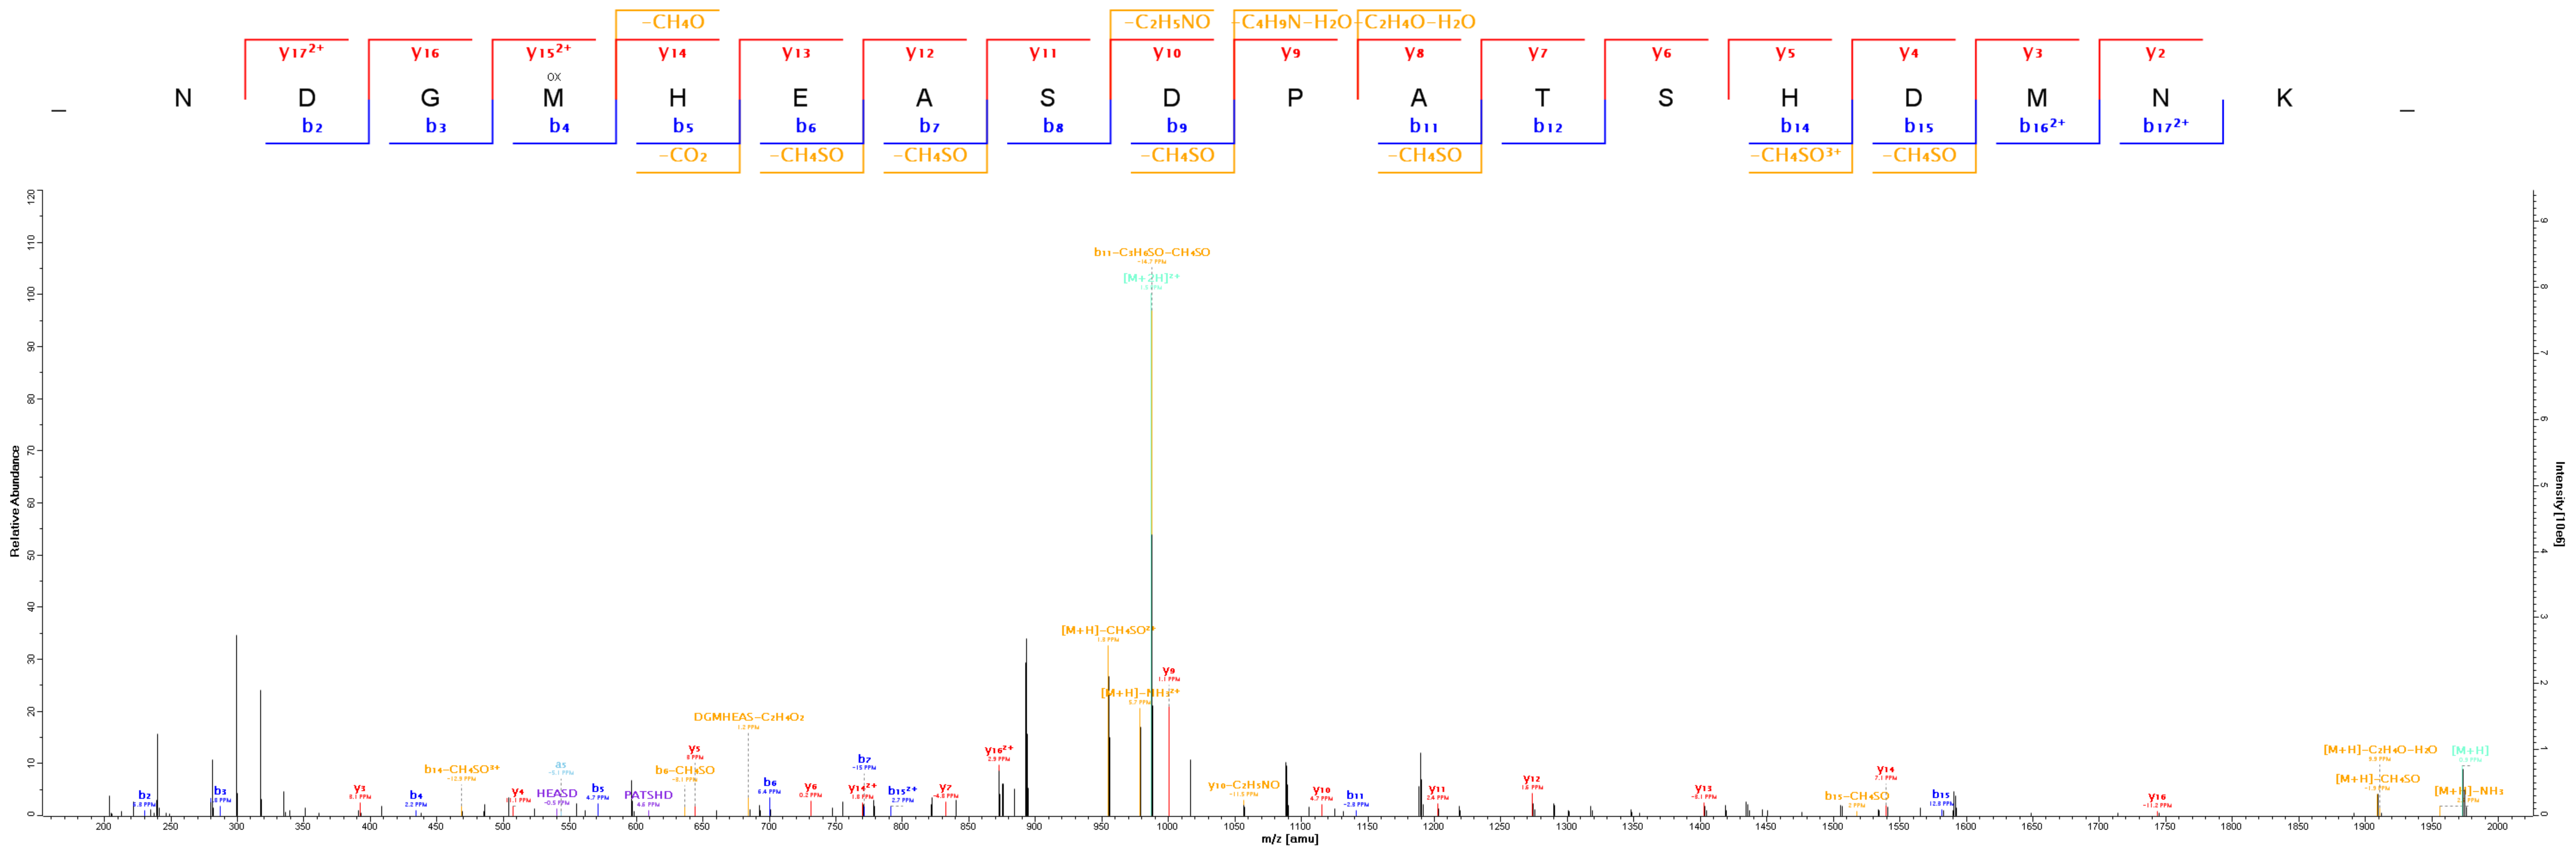

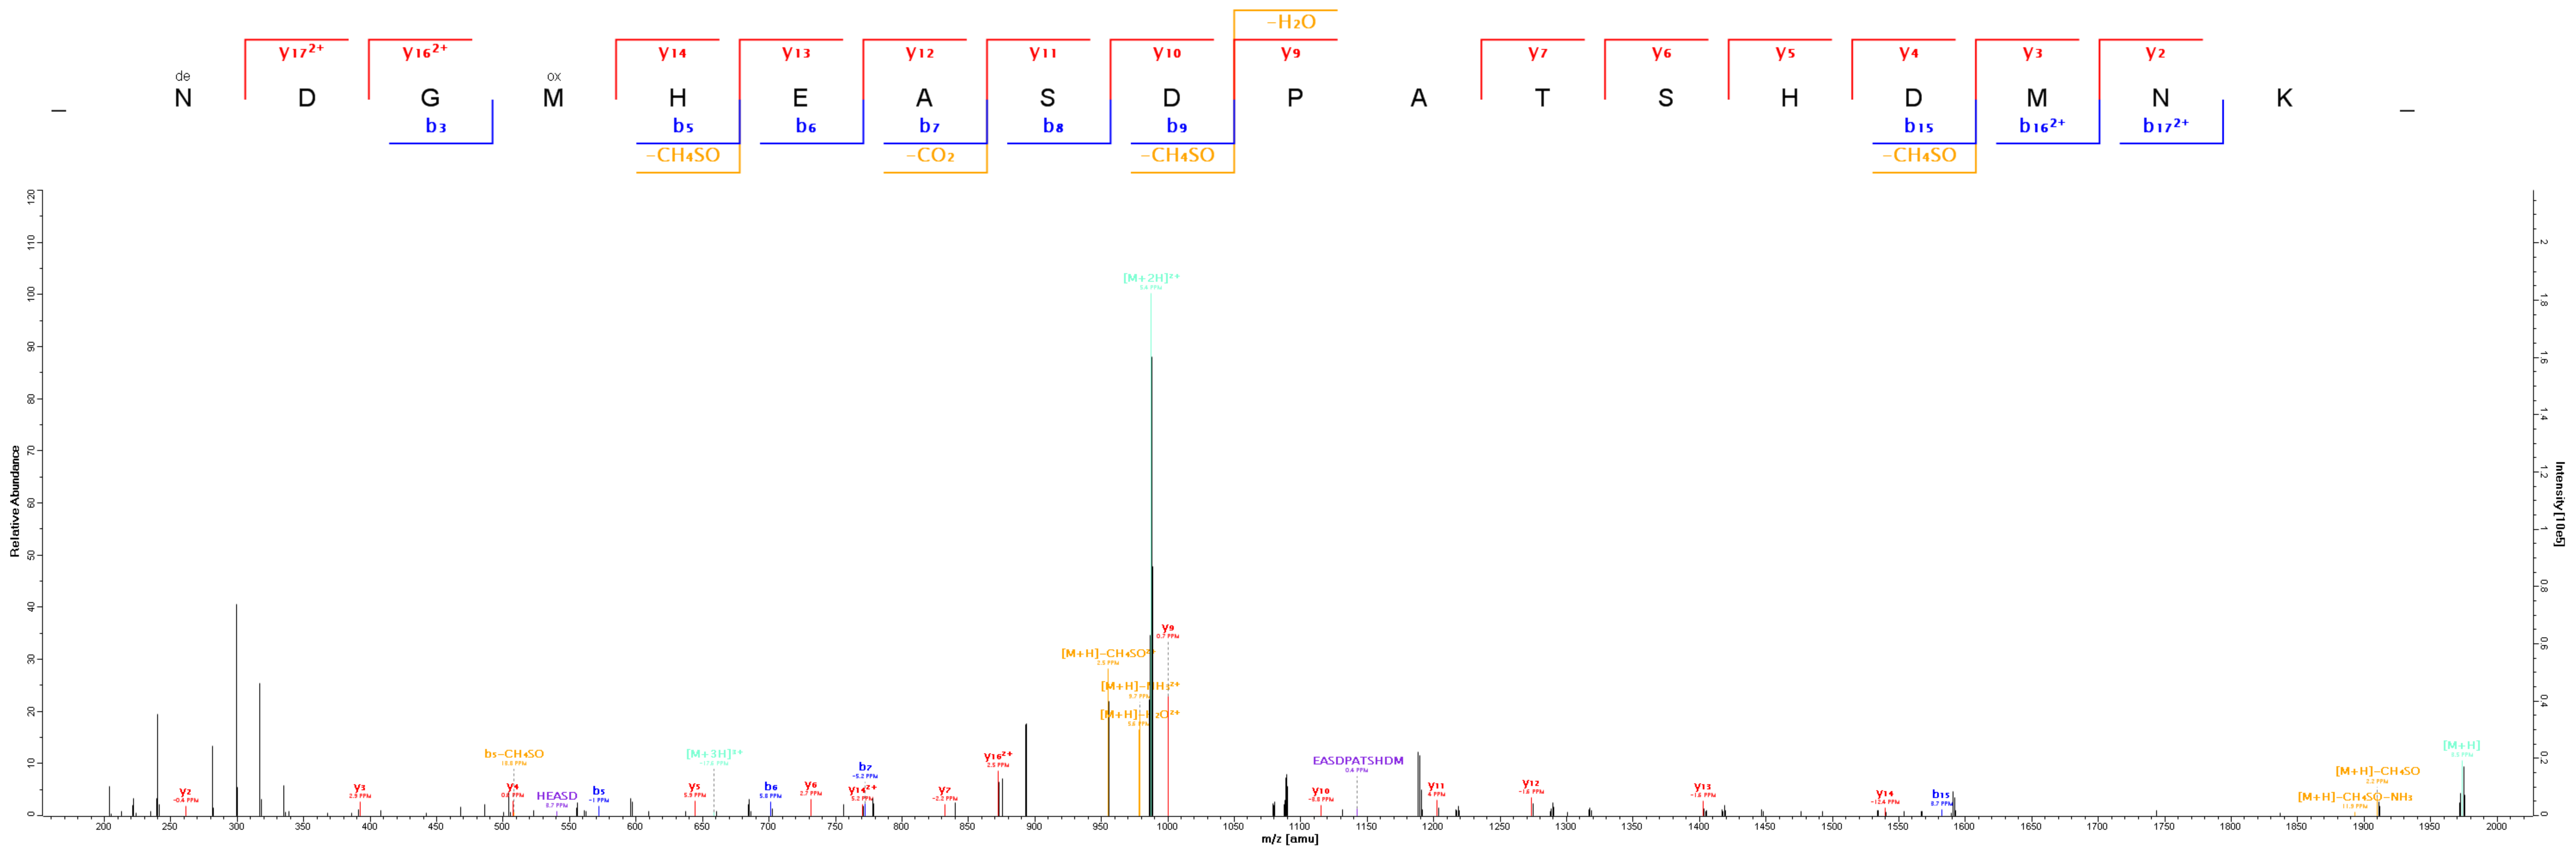

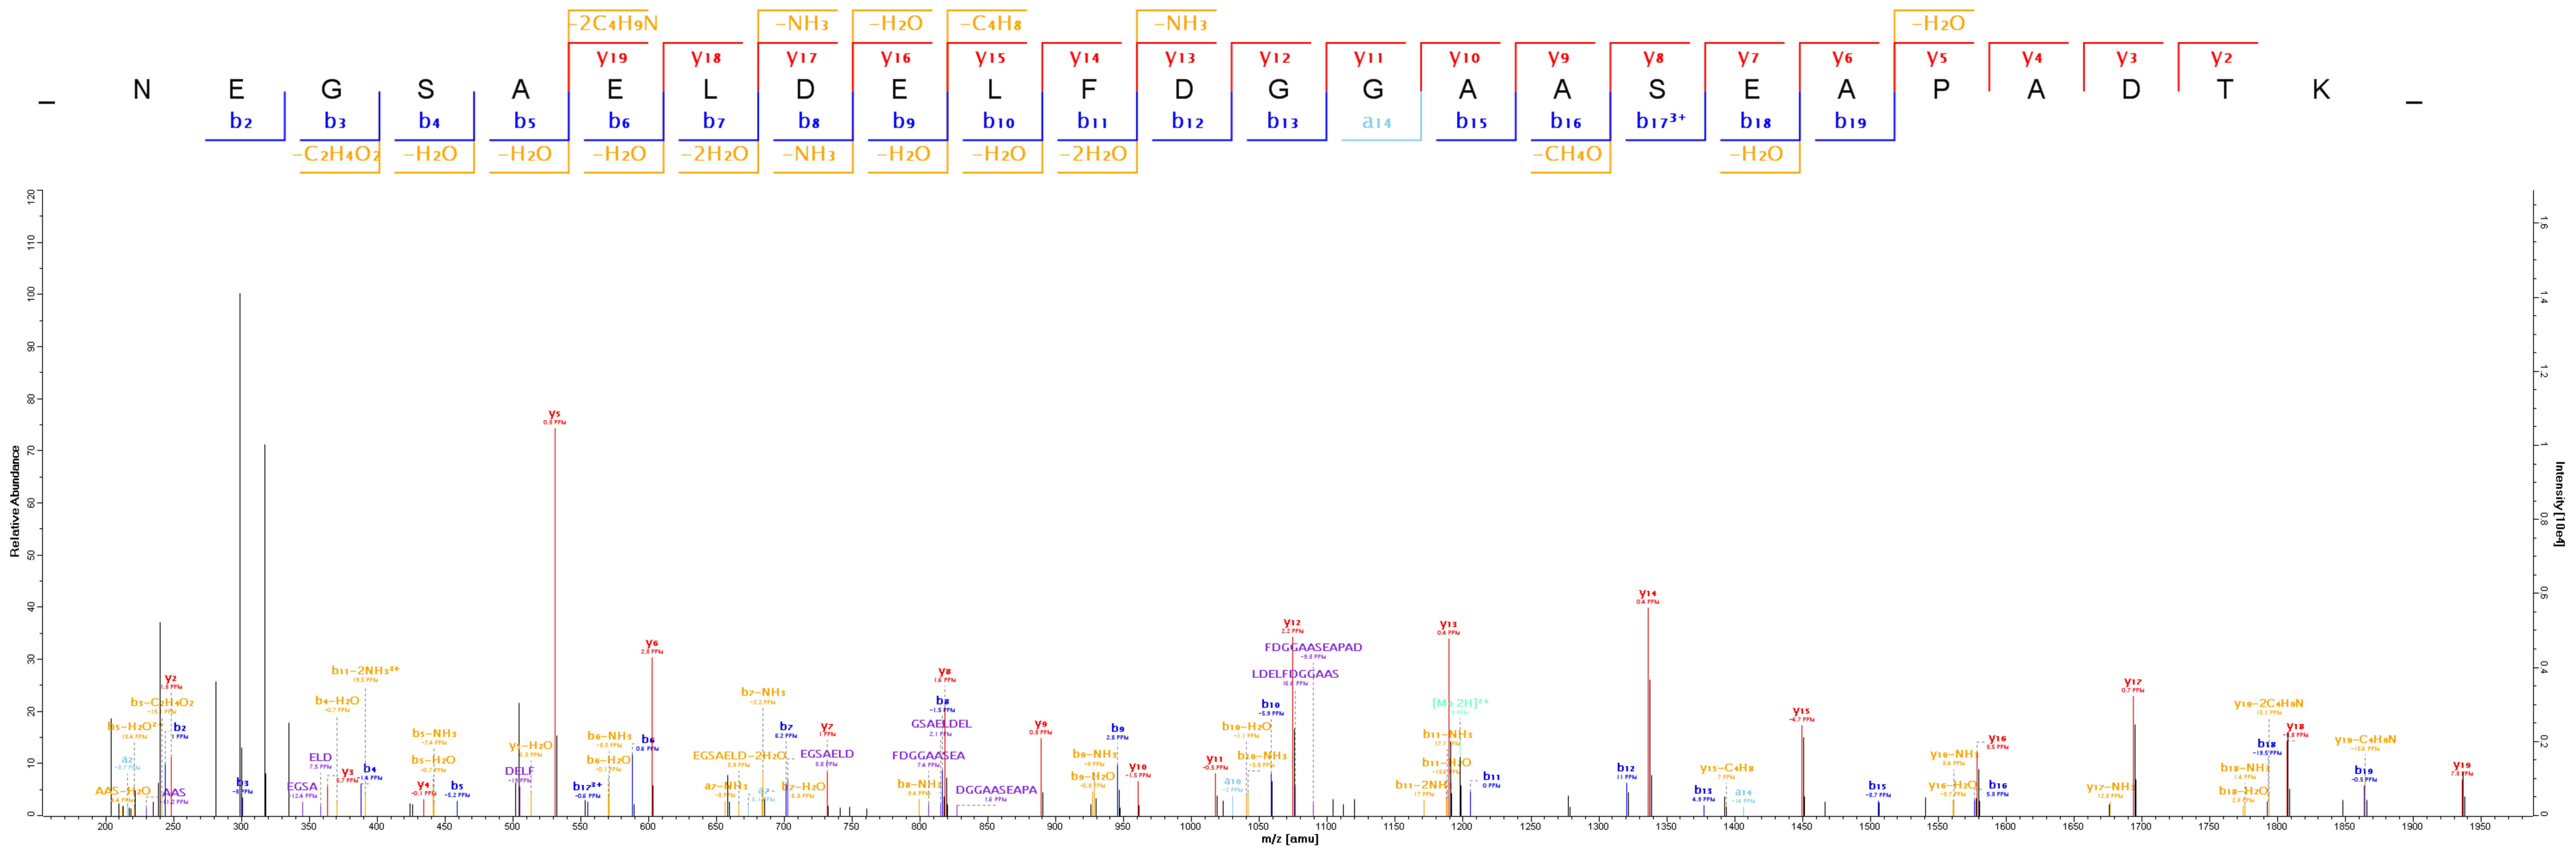

N E G S A E L D E L F D G G A A S E A P A D T K

C<sub>4</sub>H<sub>8</sub>

y<sub>15</sub>

y<sub>14</sub>

y<sub>13</sub>

y<sub>12</sub>

y<sub>8</sub>

y<sub>6</sub>

y<sub>5</sub>

y<sub>2</sub>

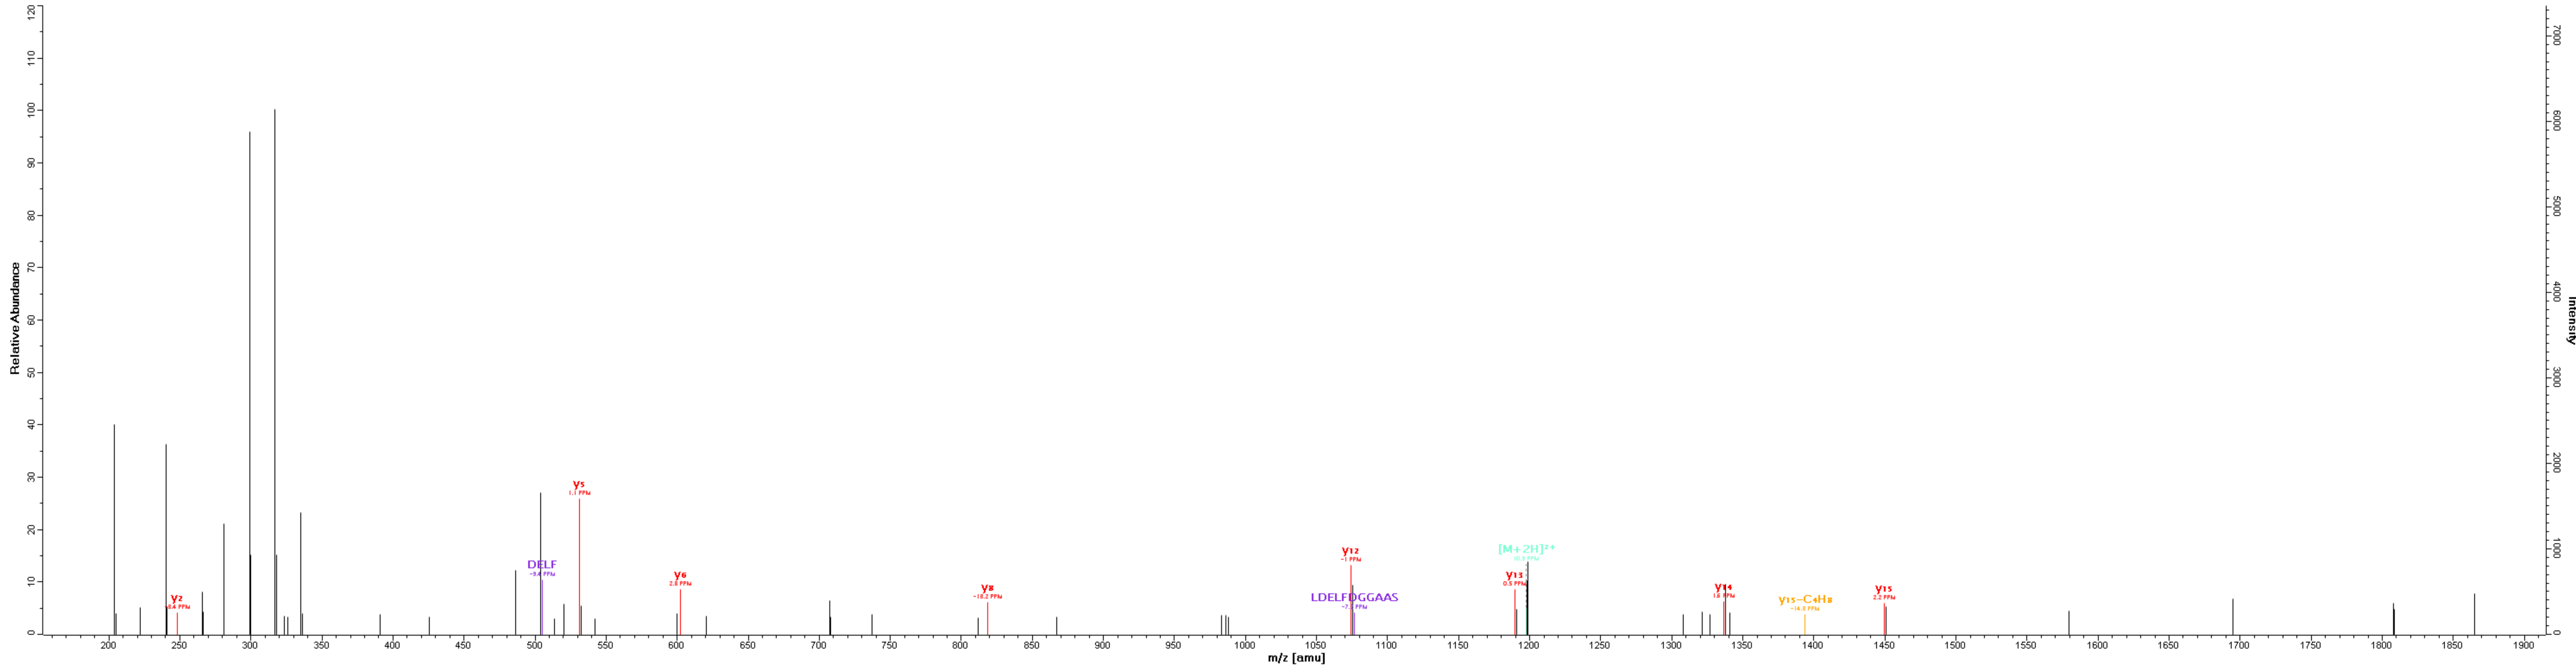

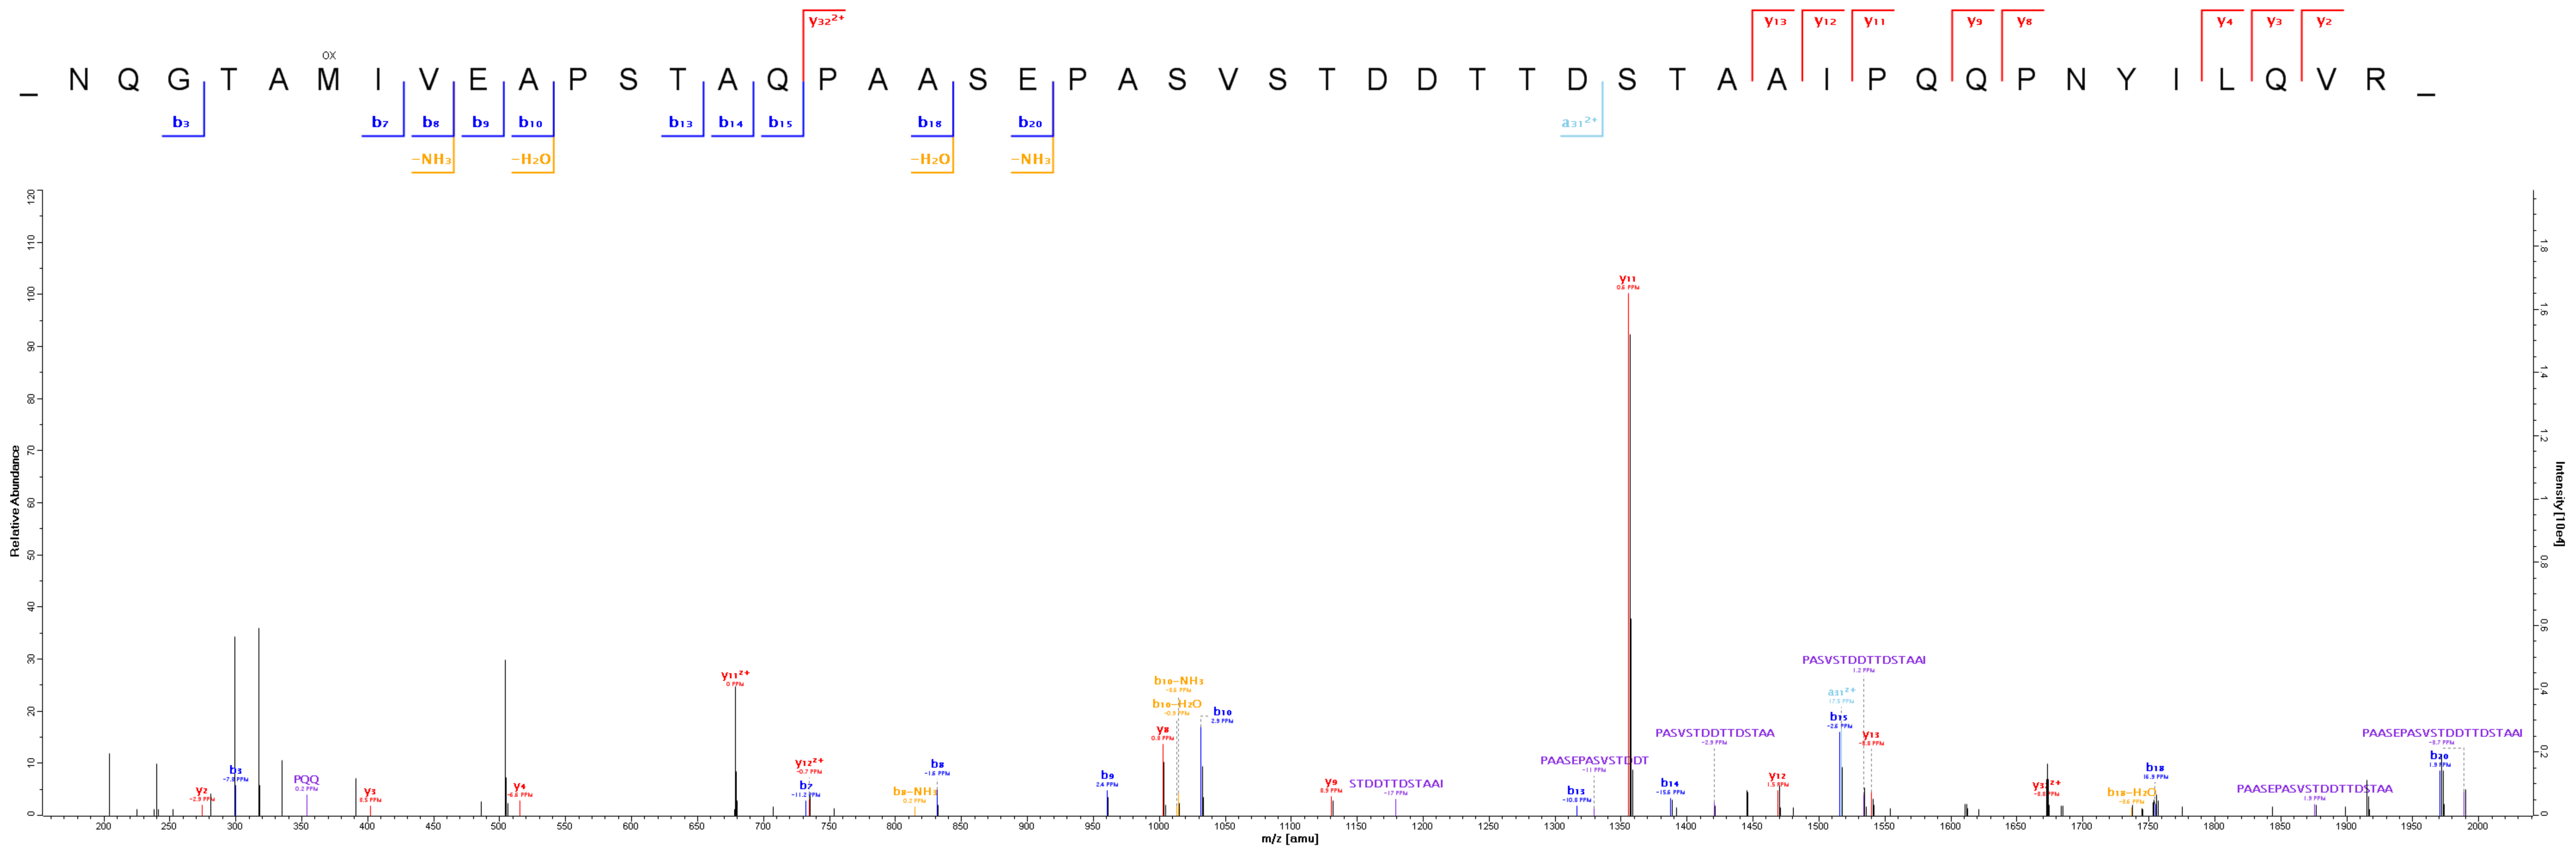



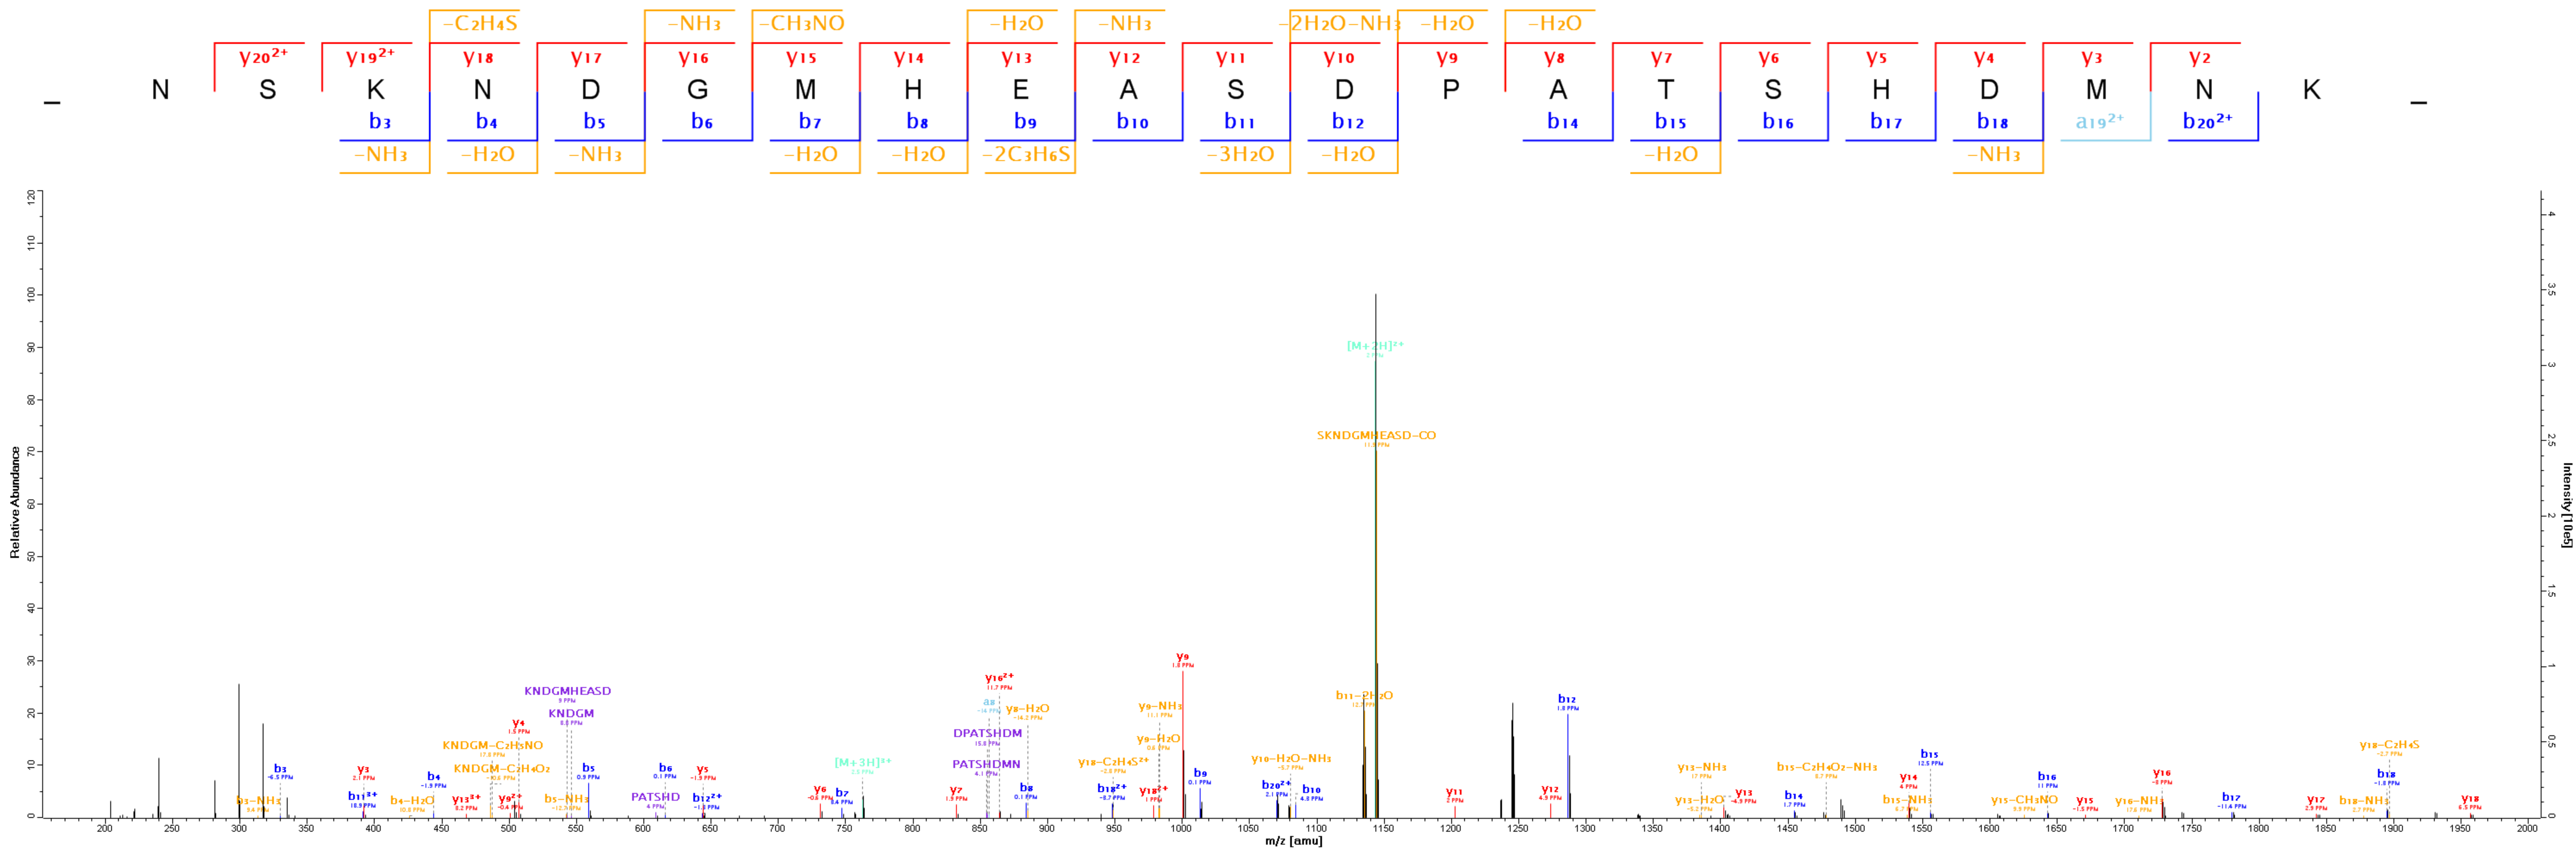

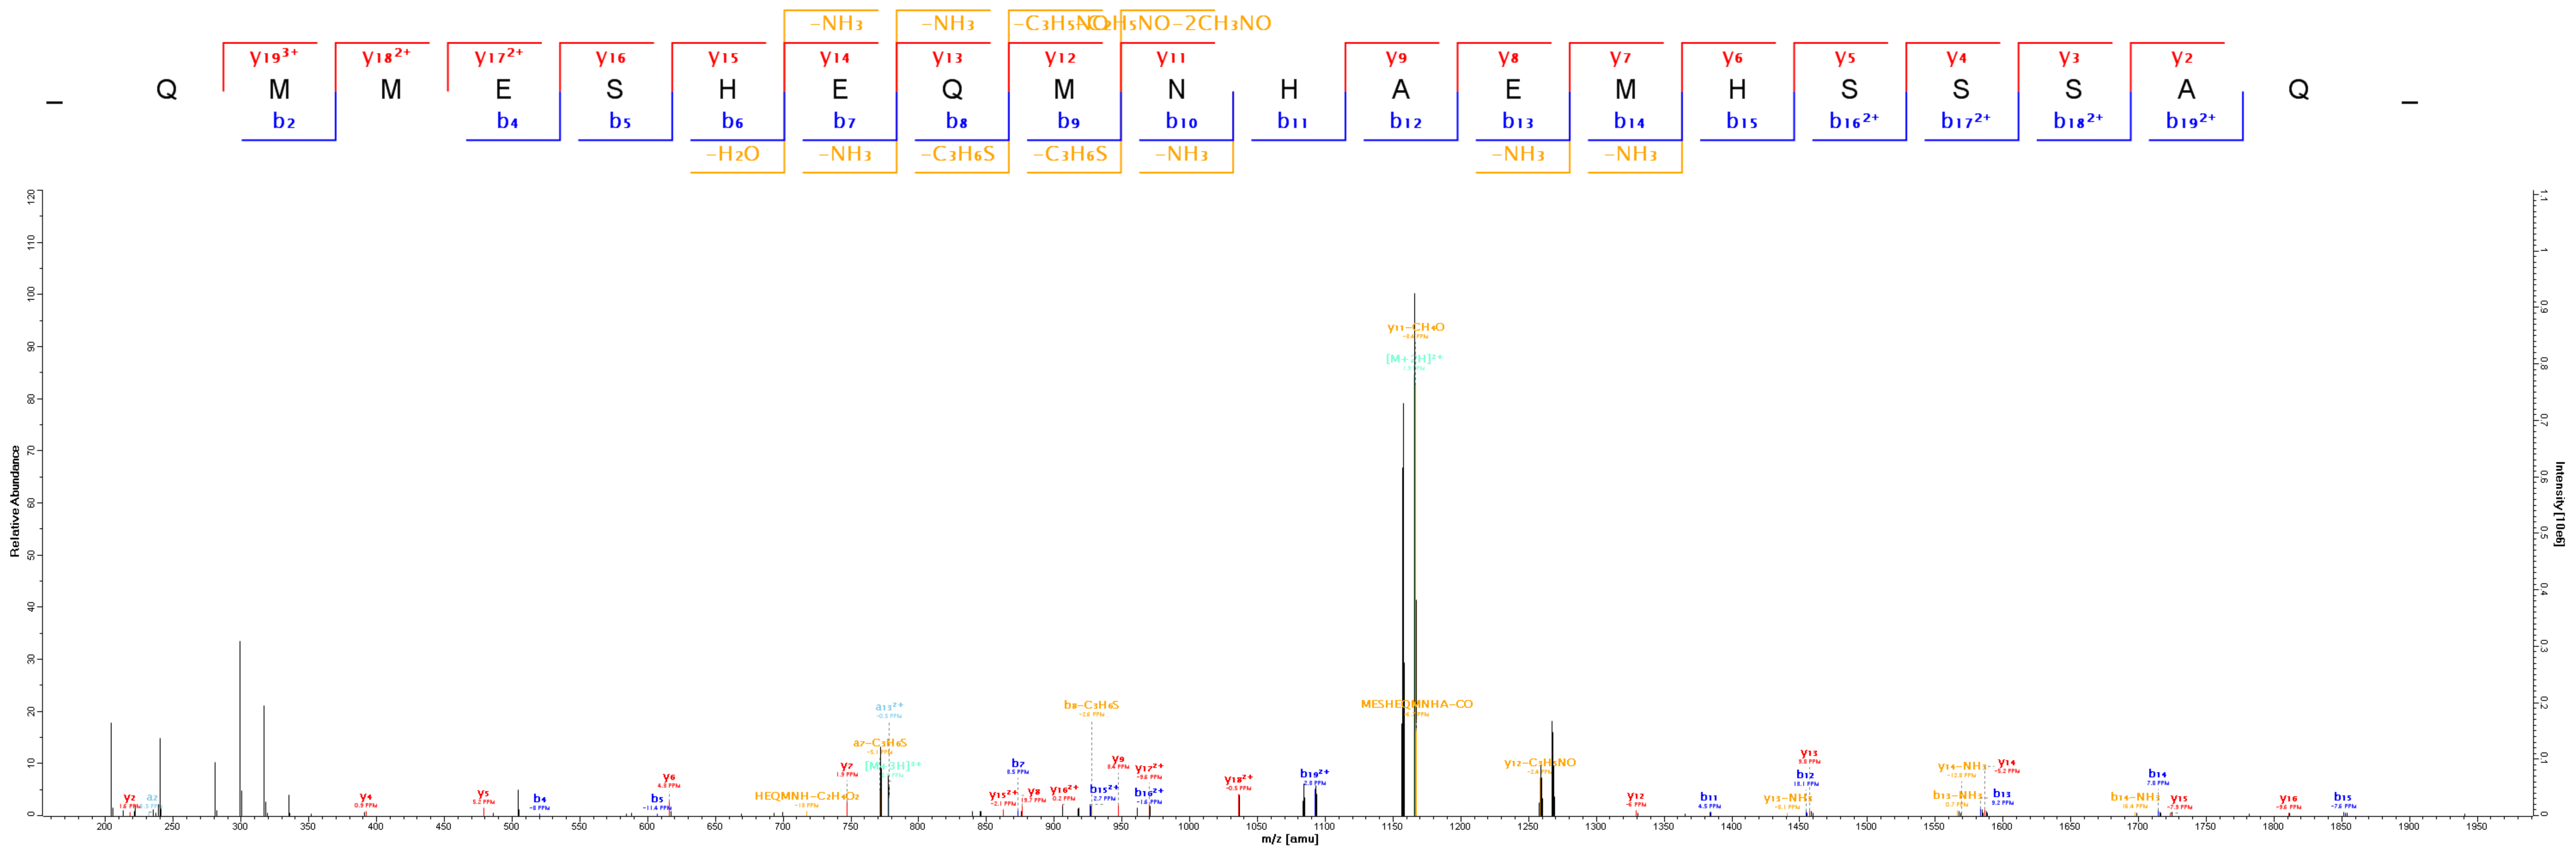

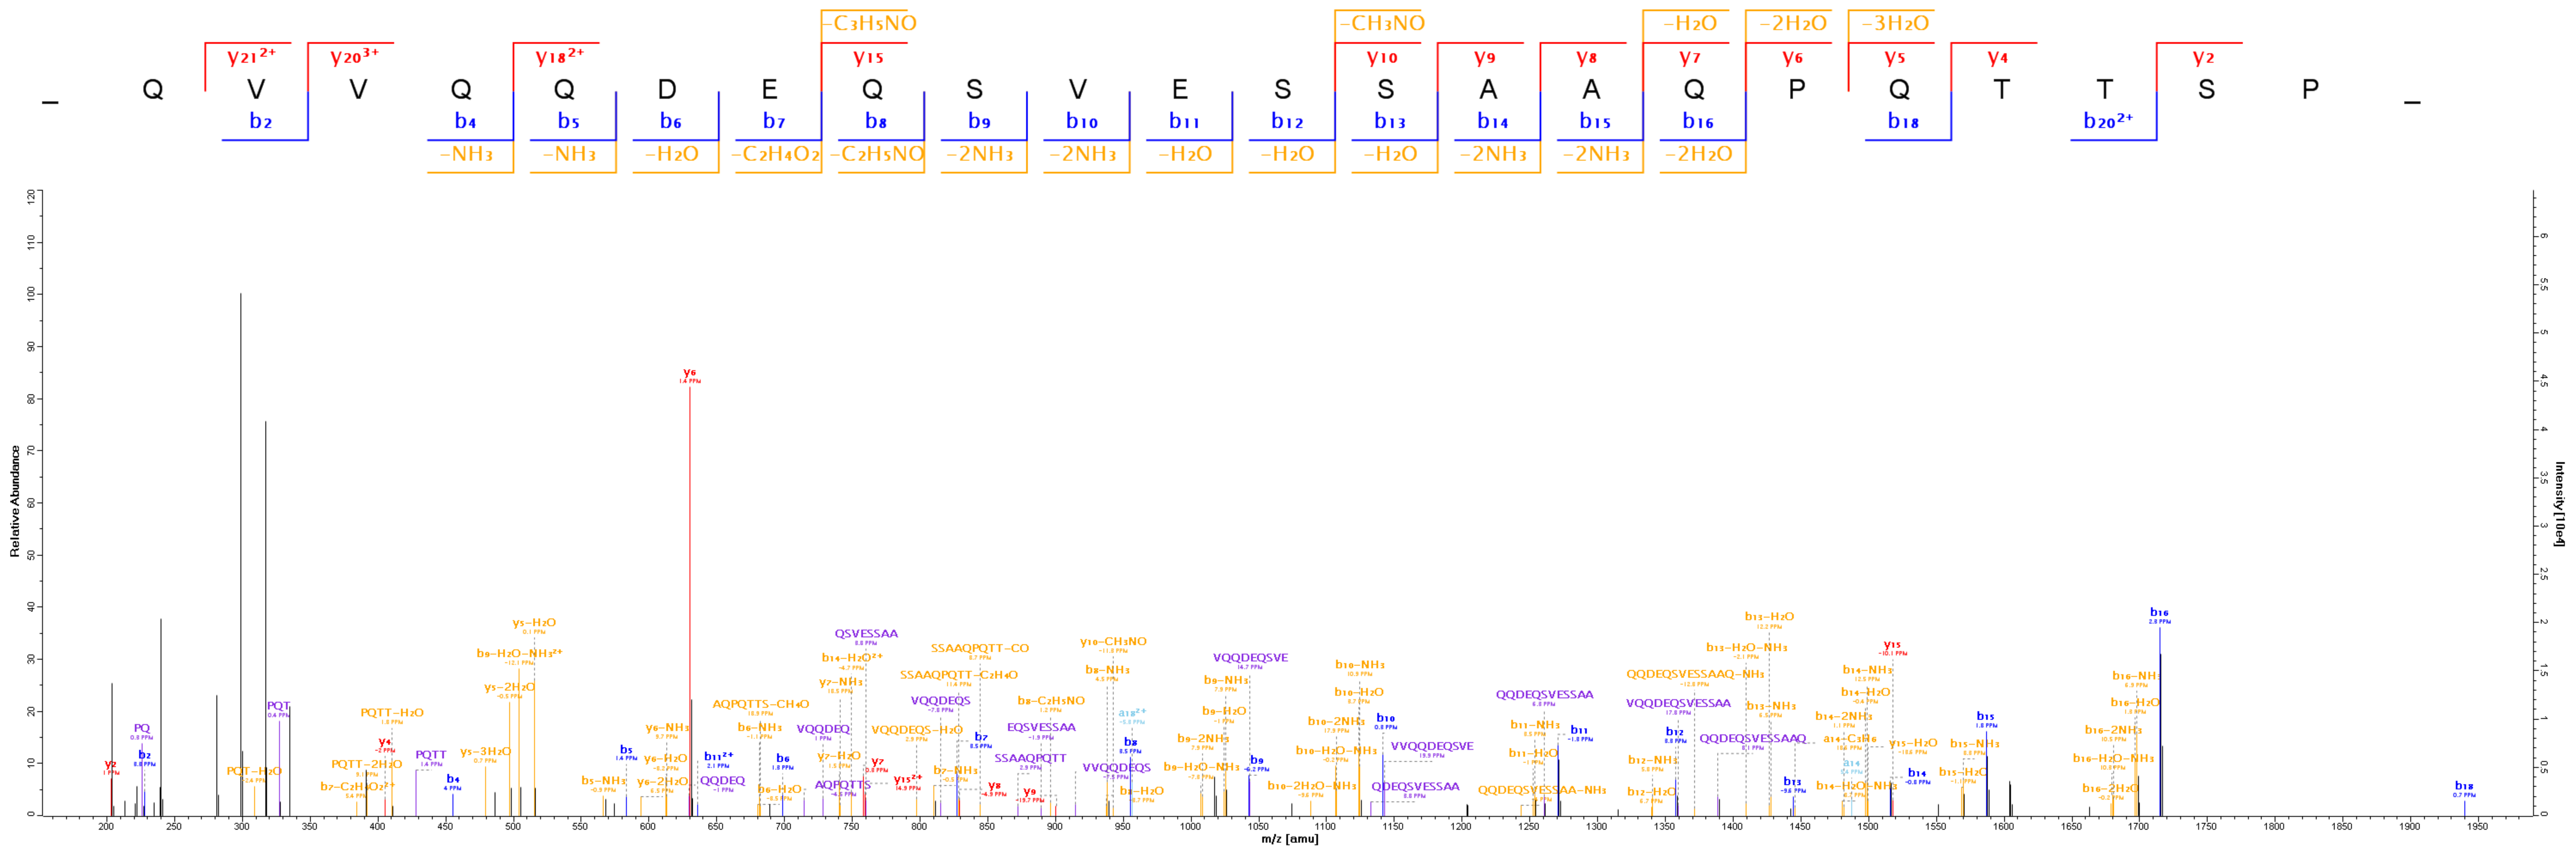

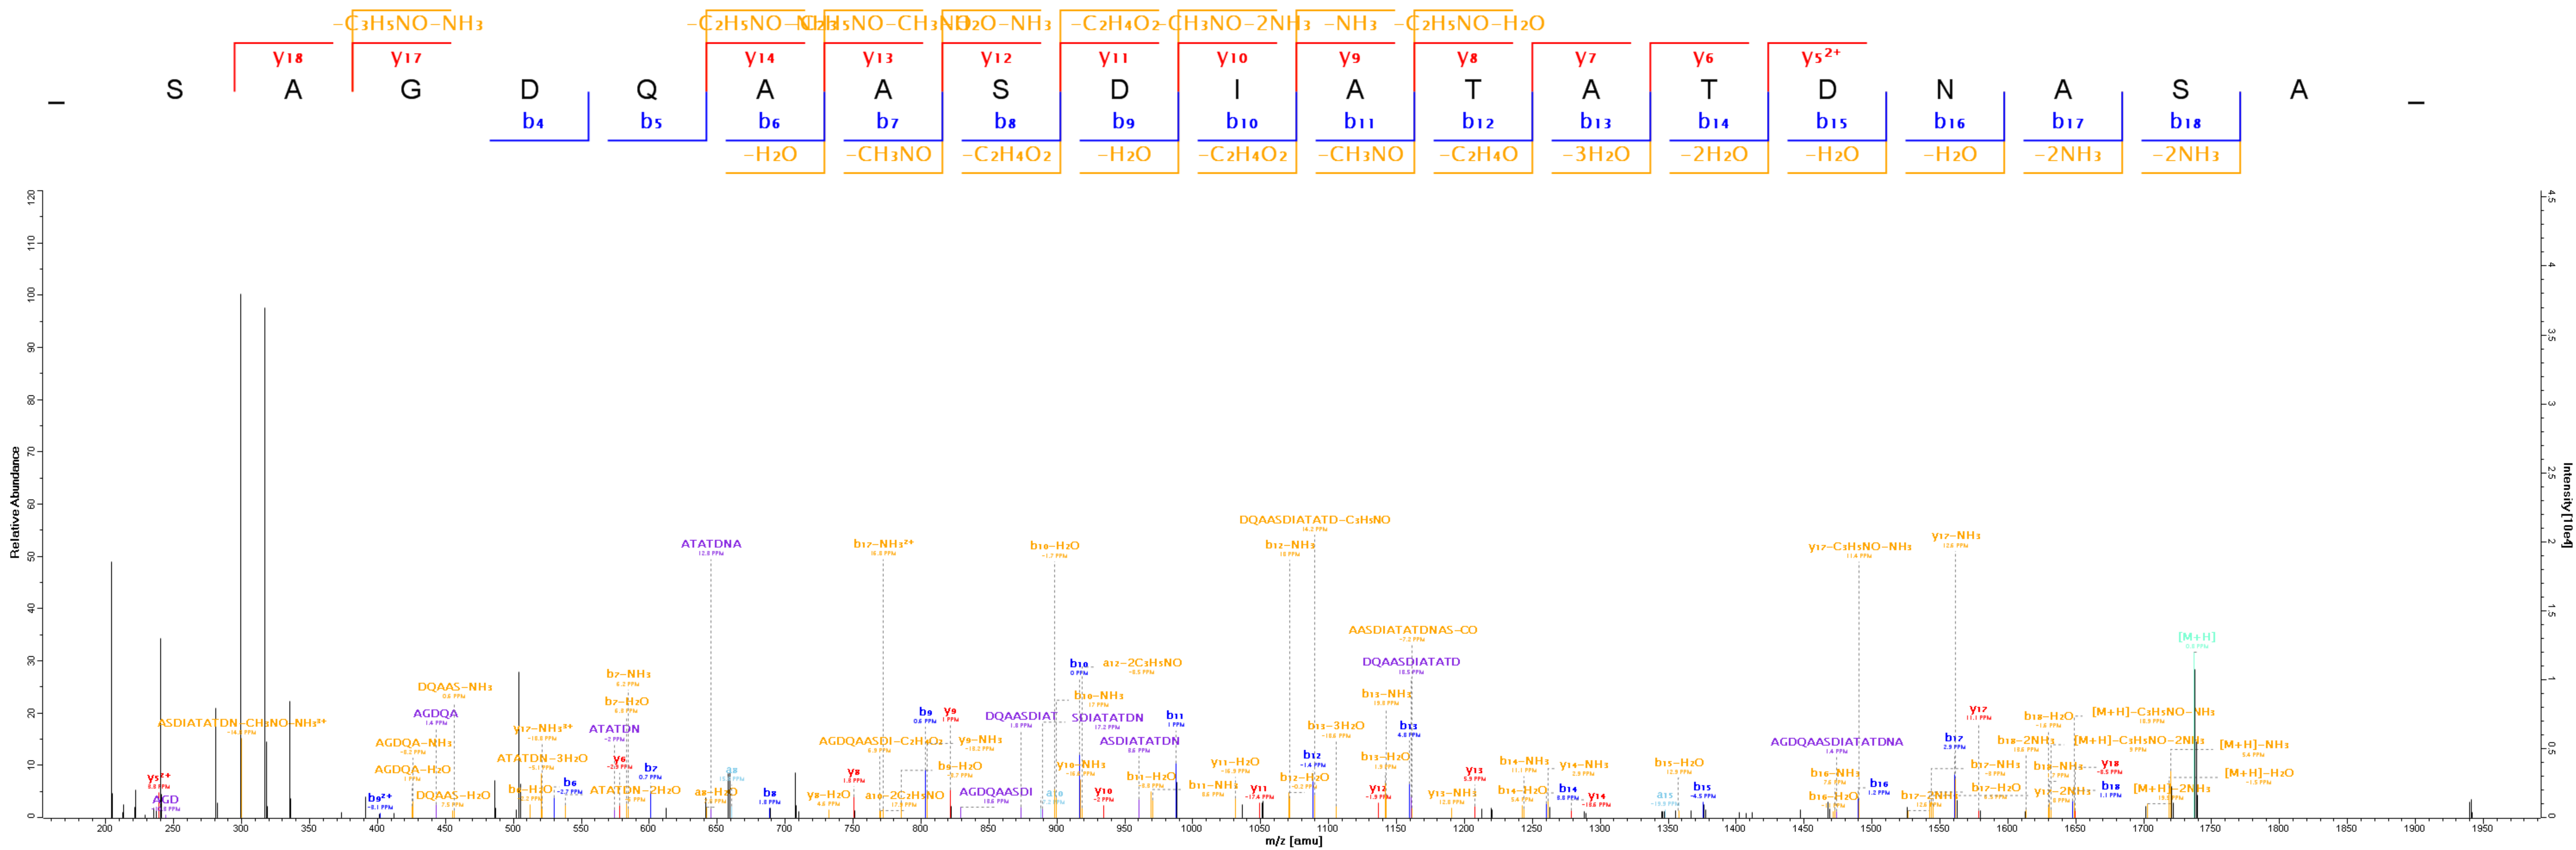

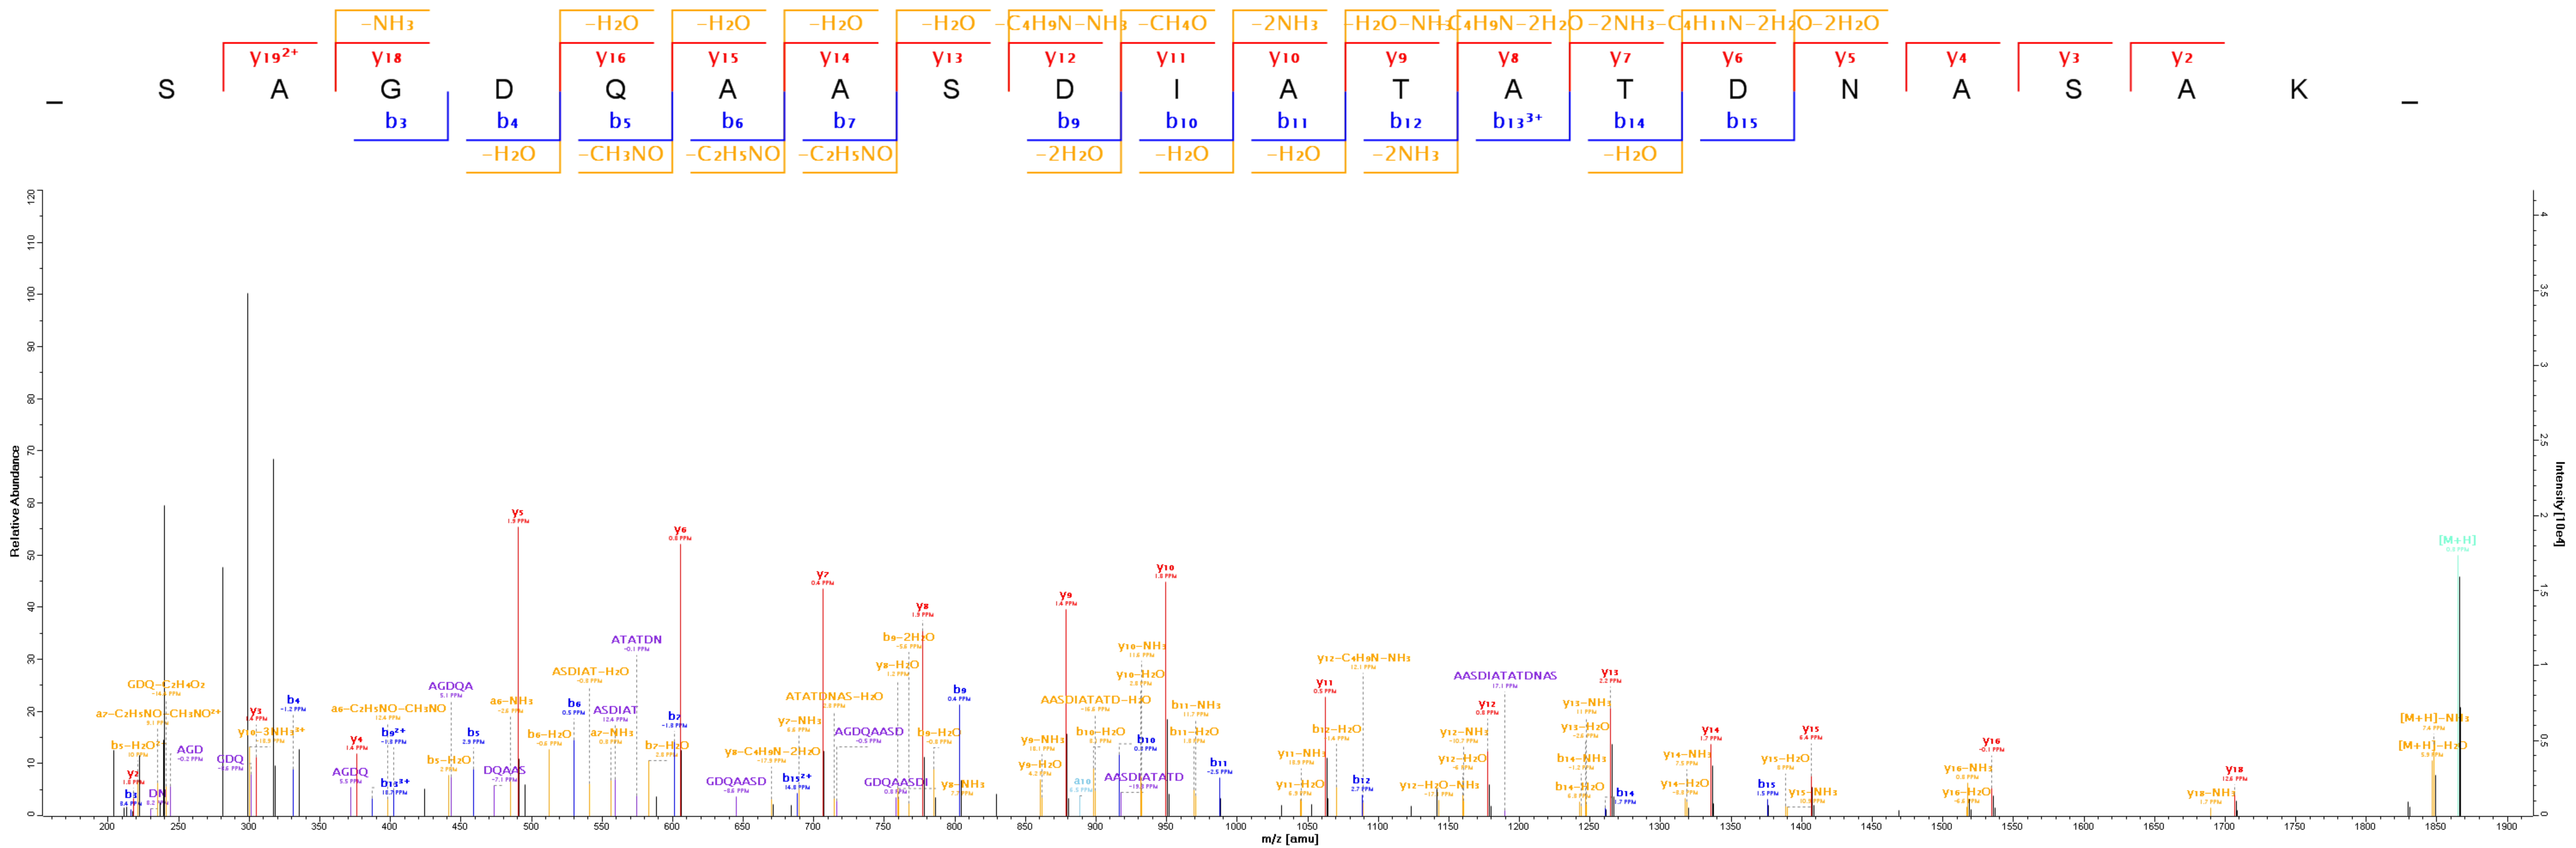

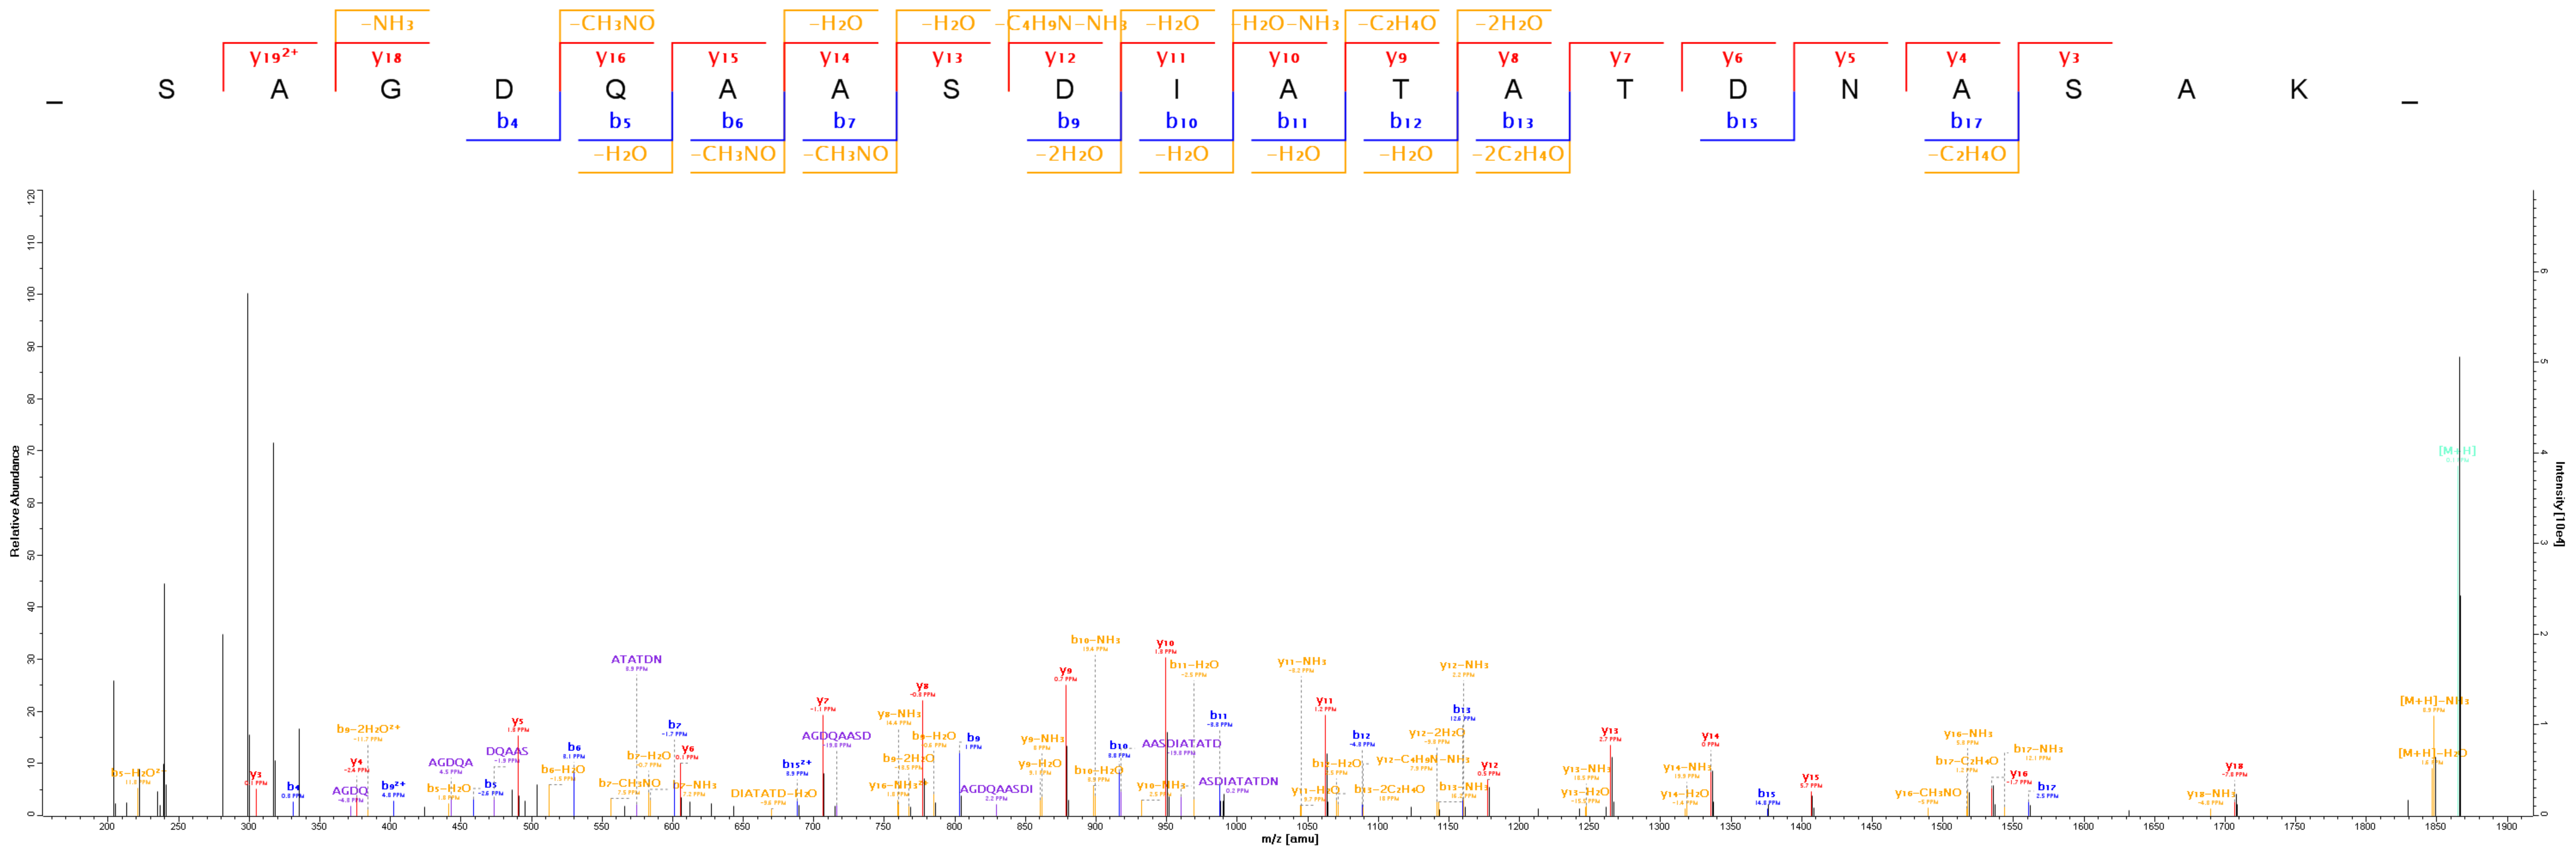



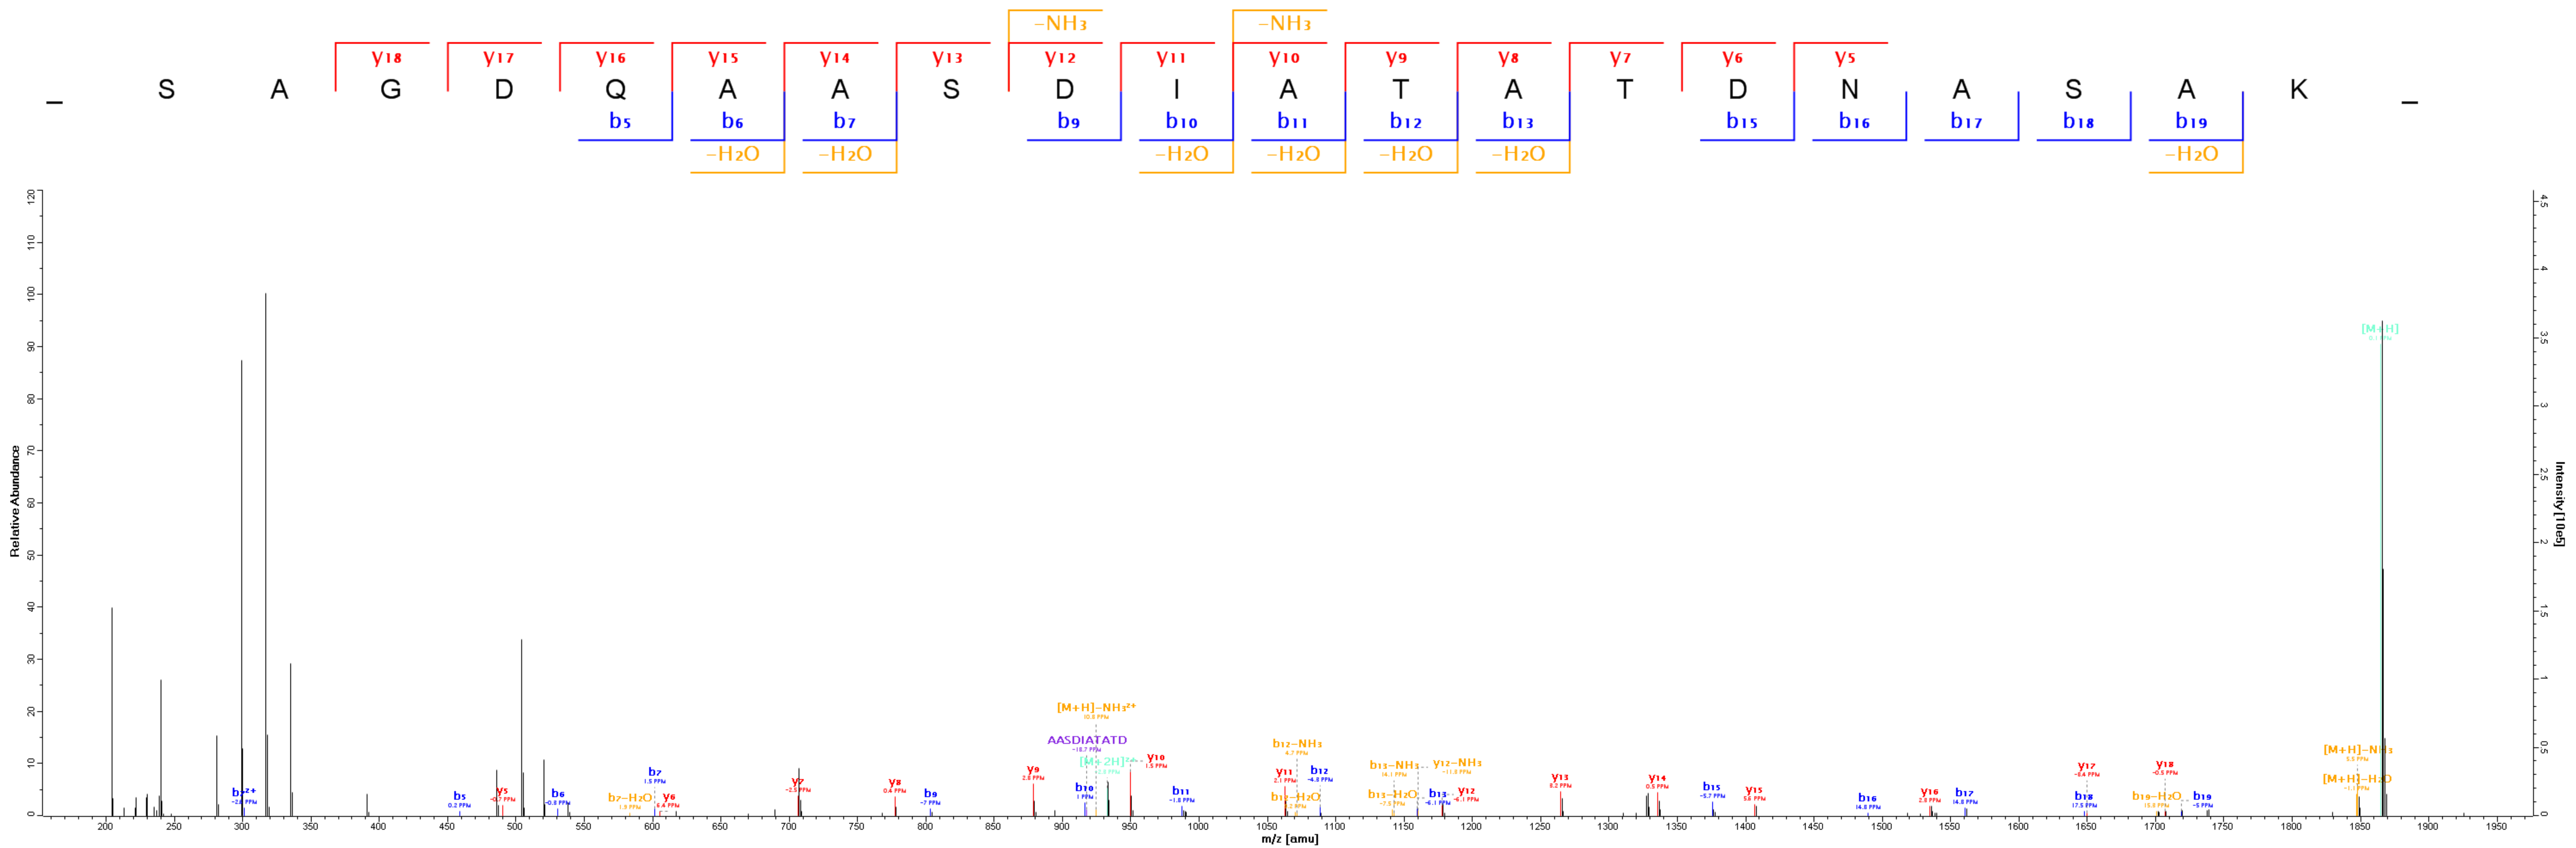

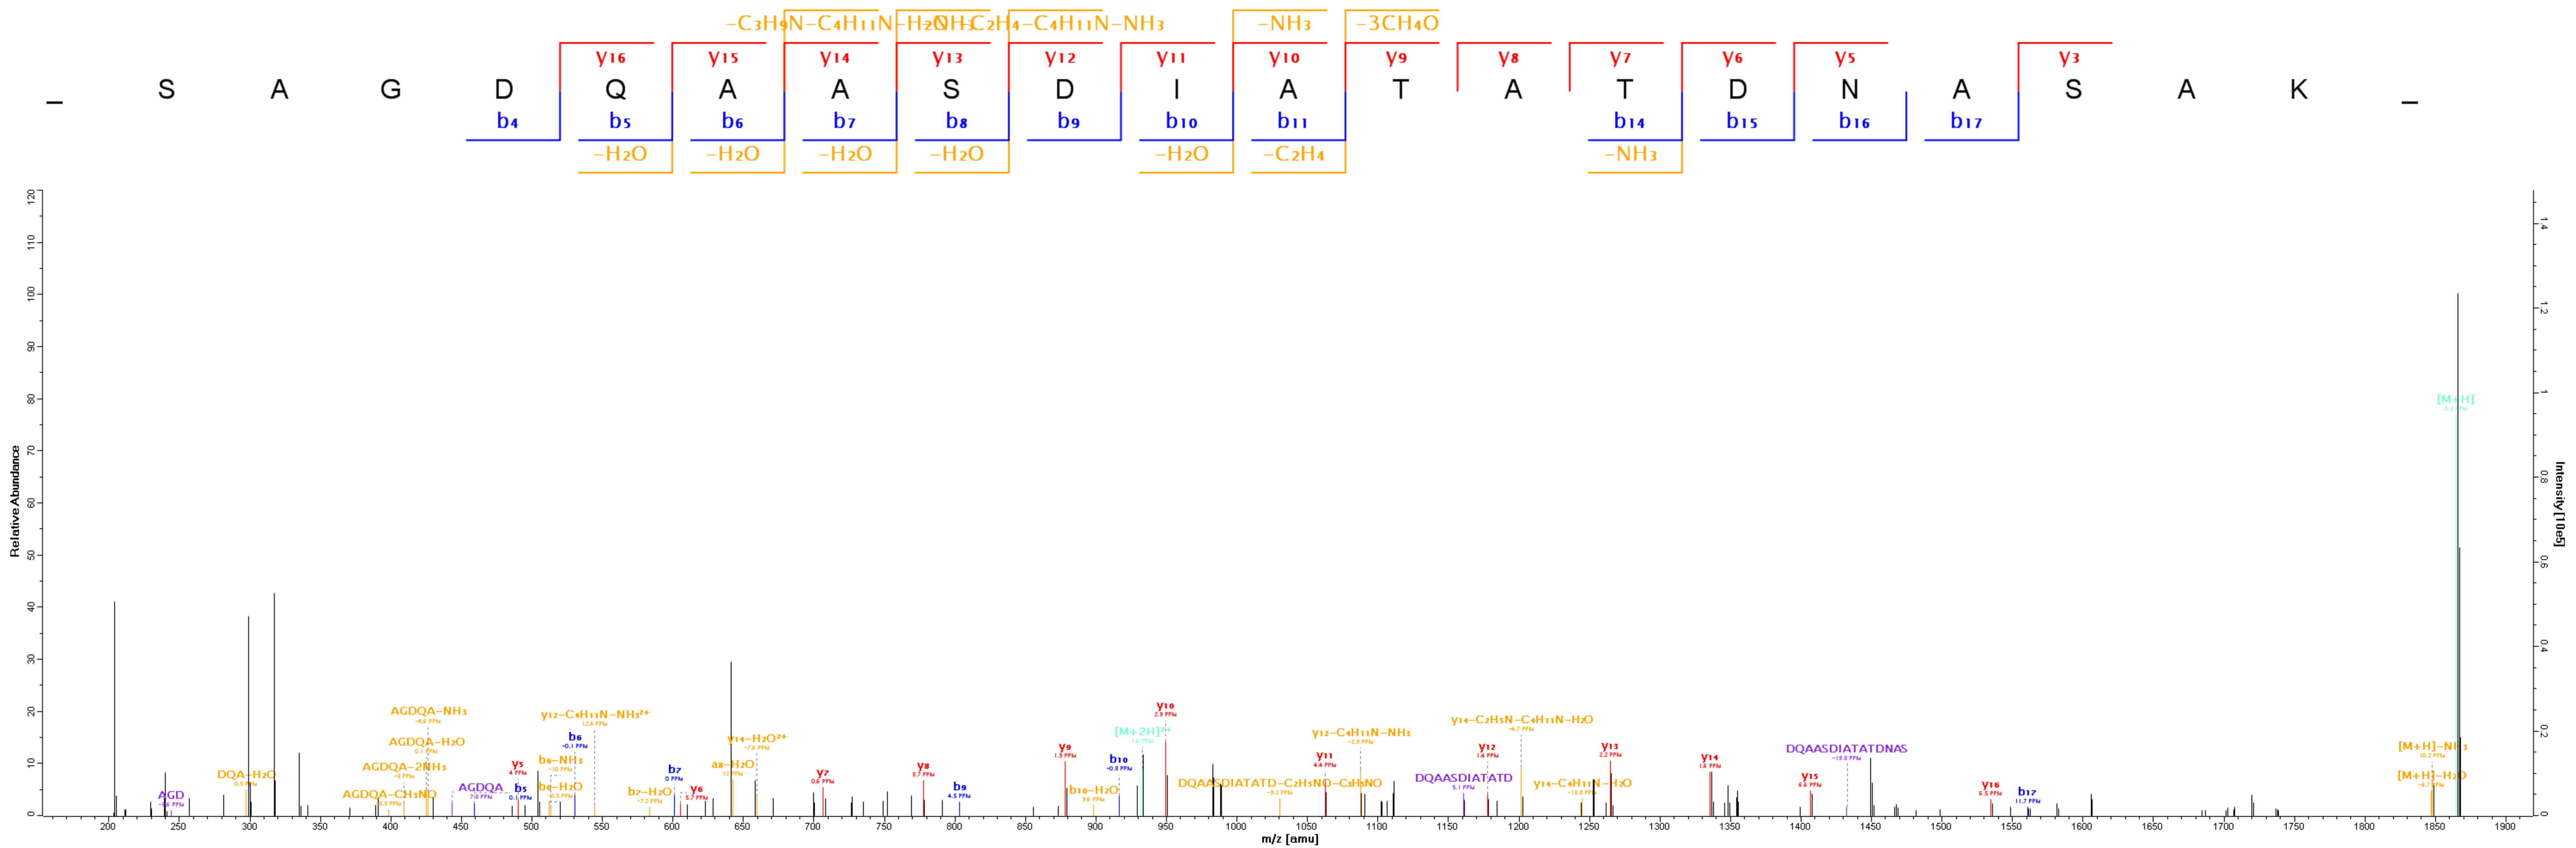



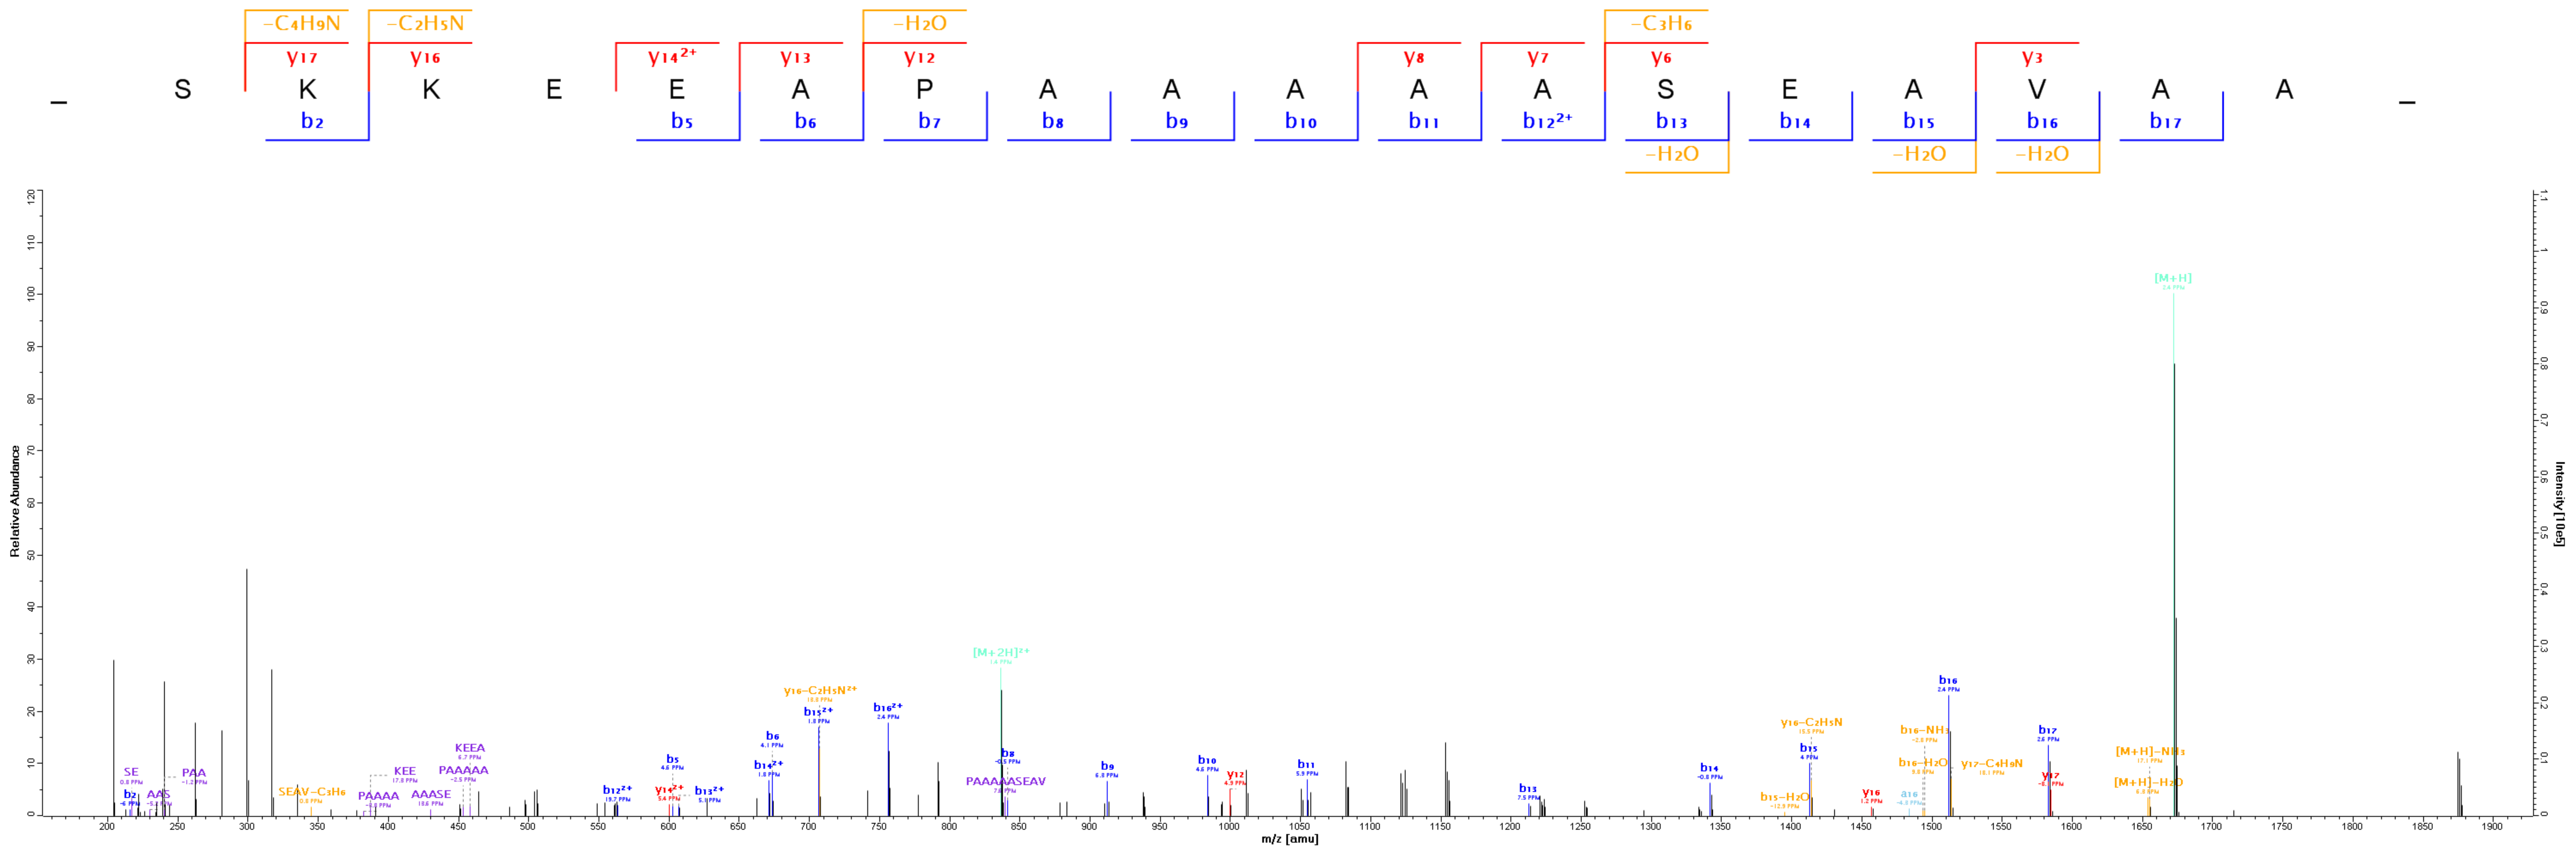

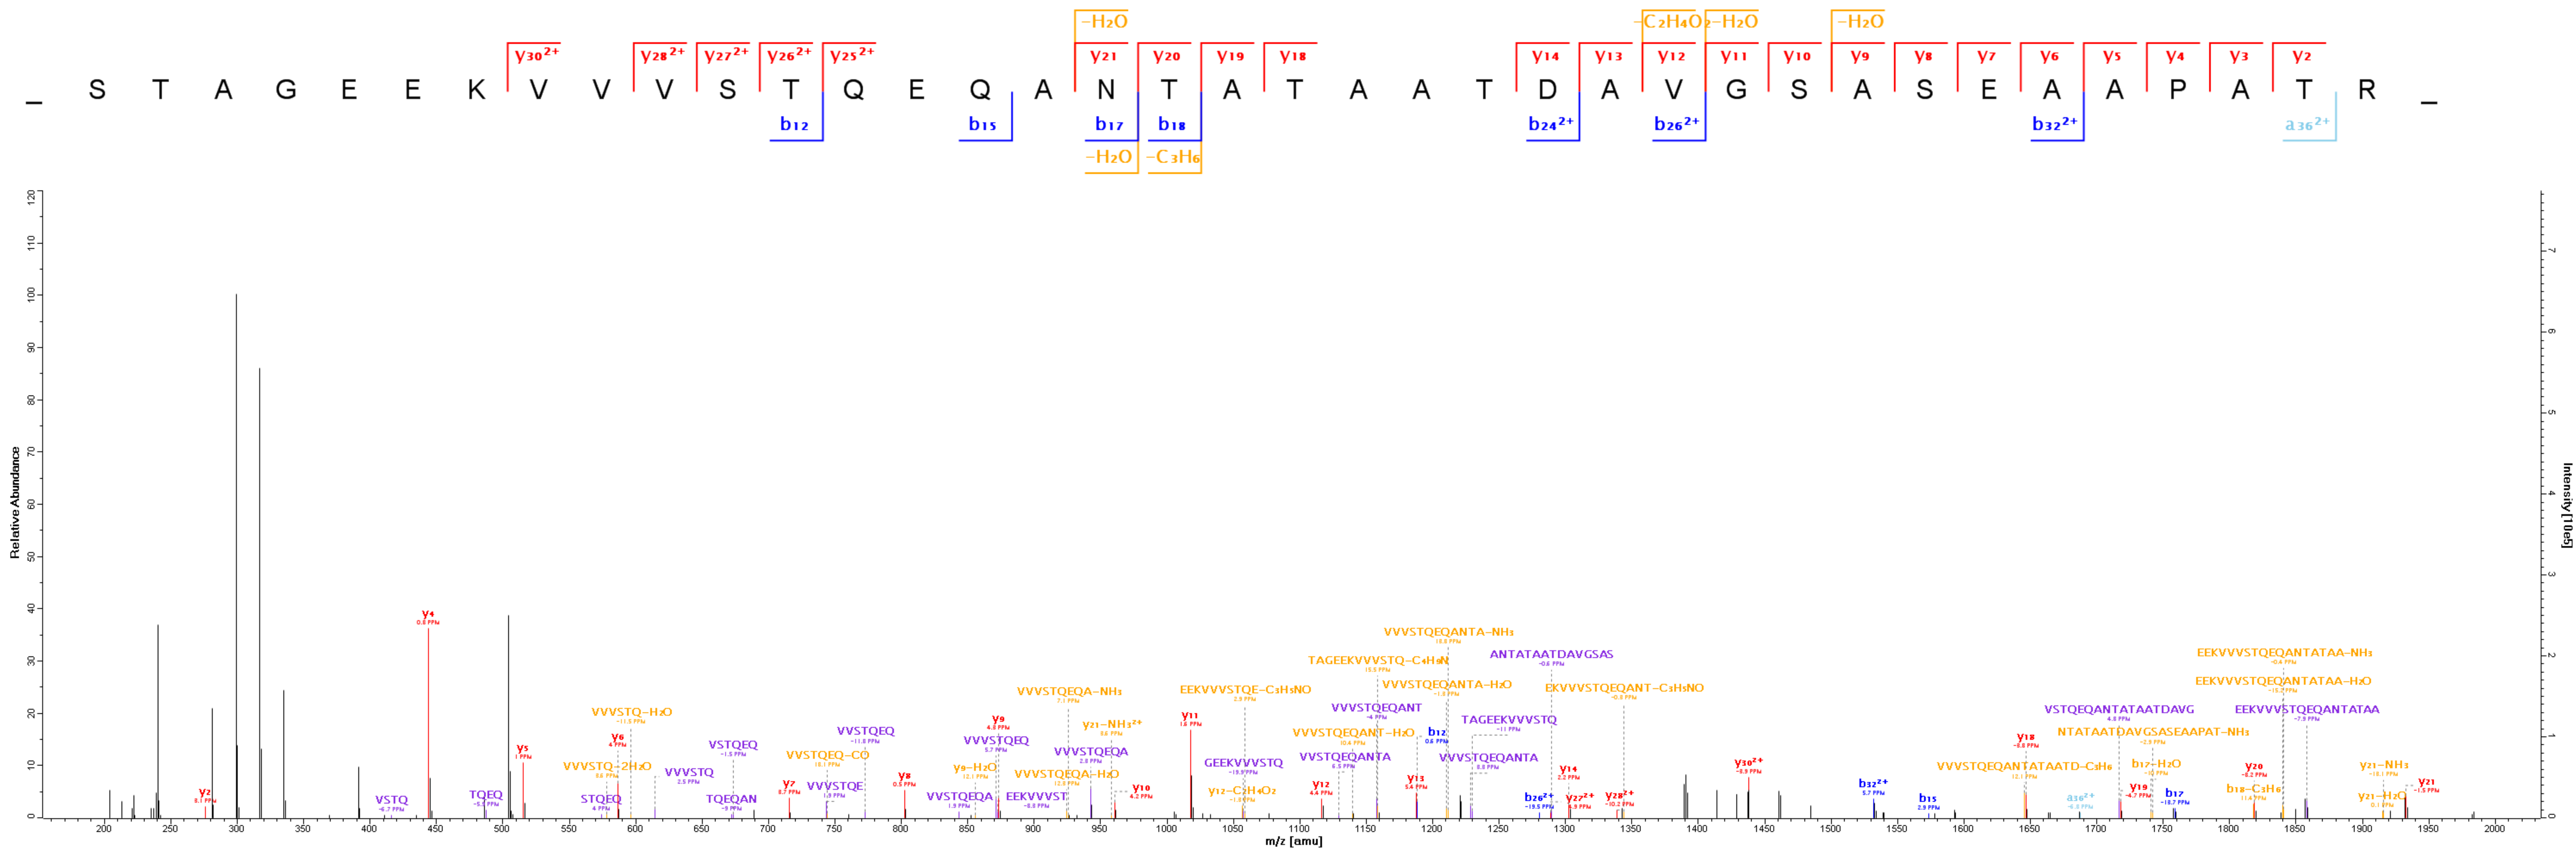

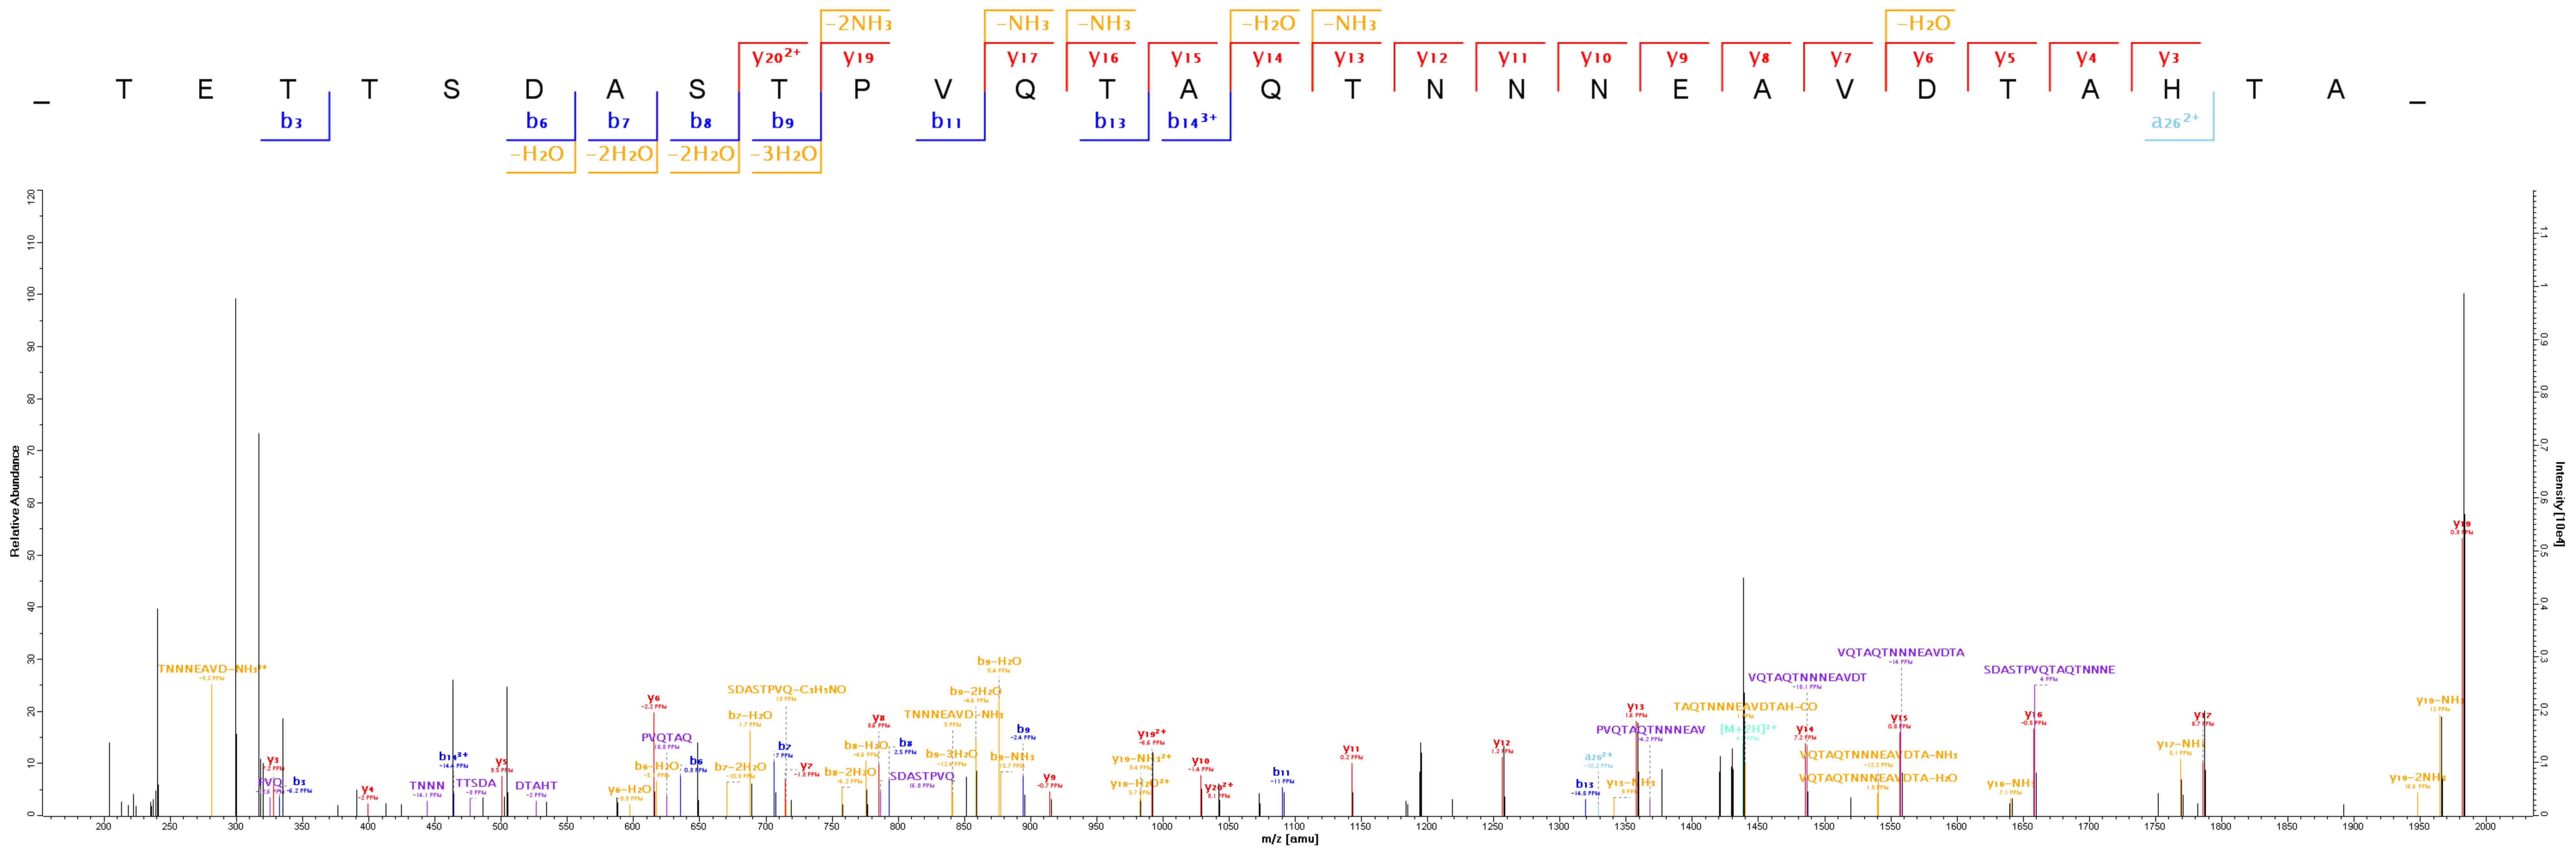

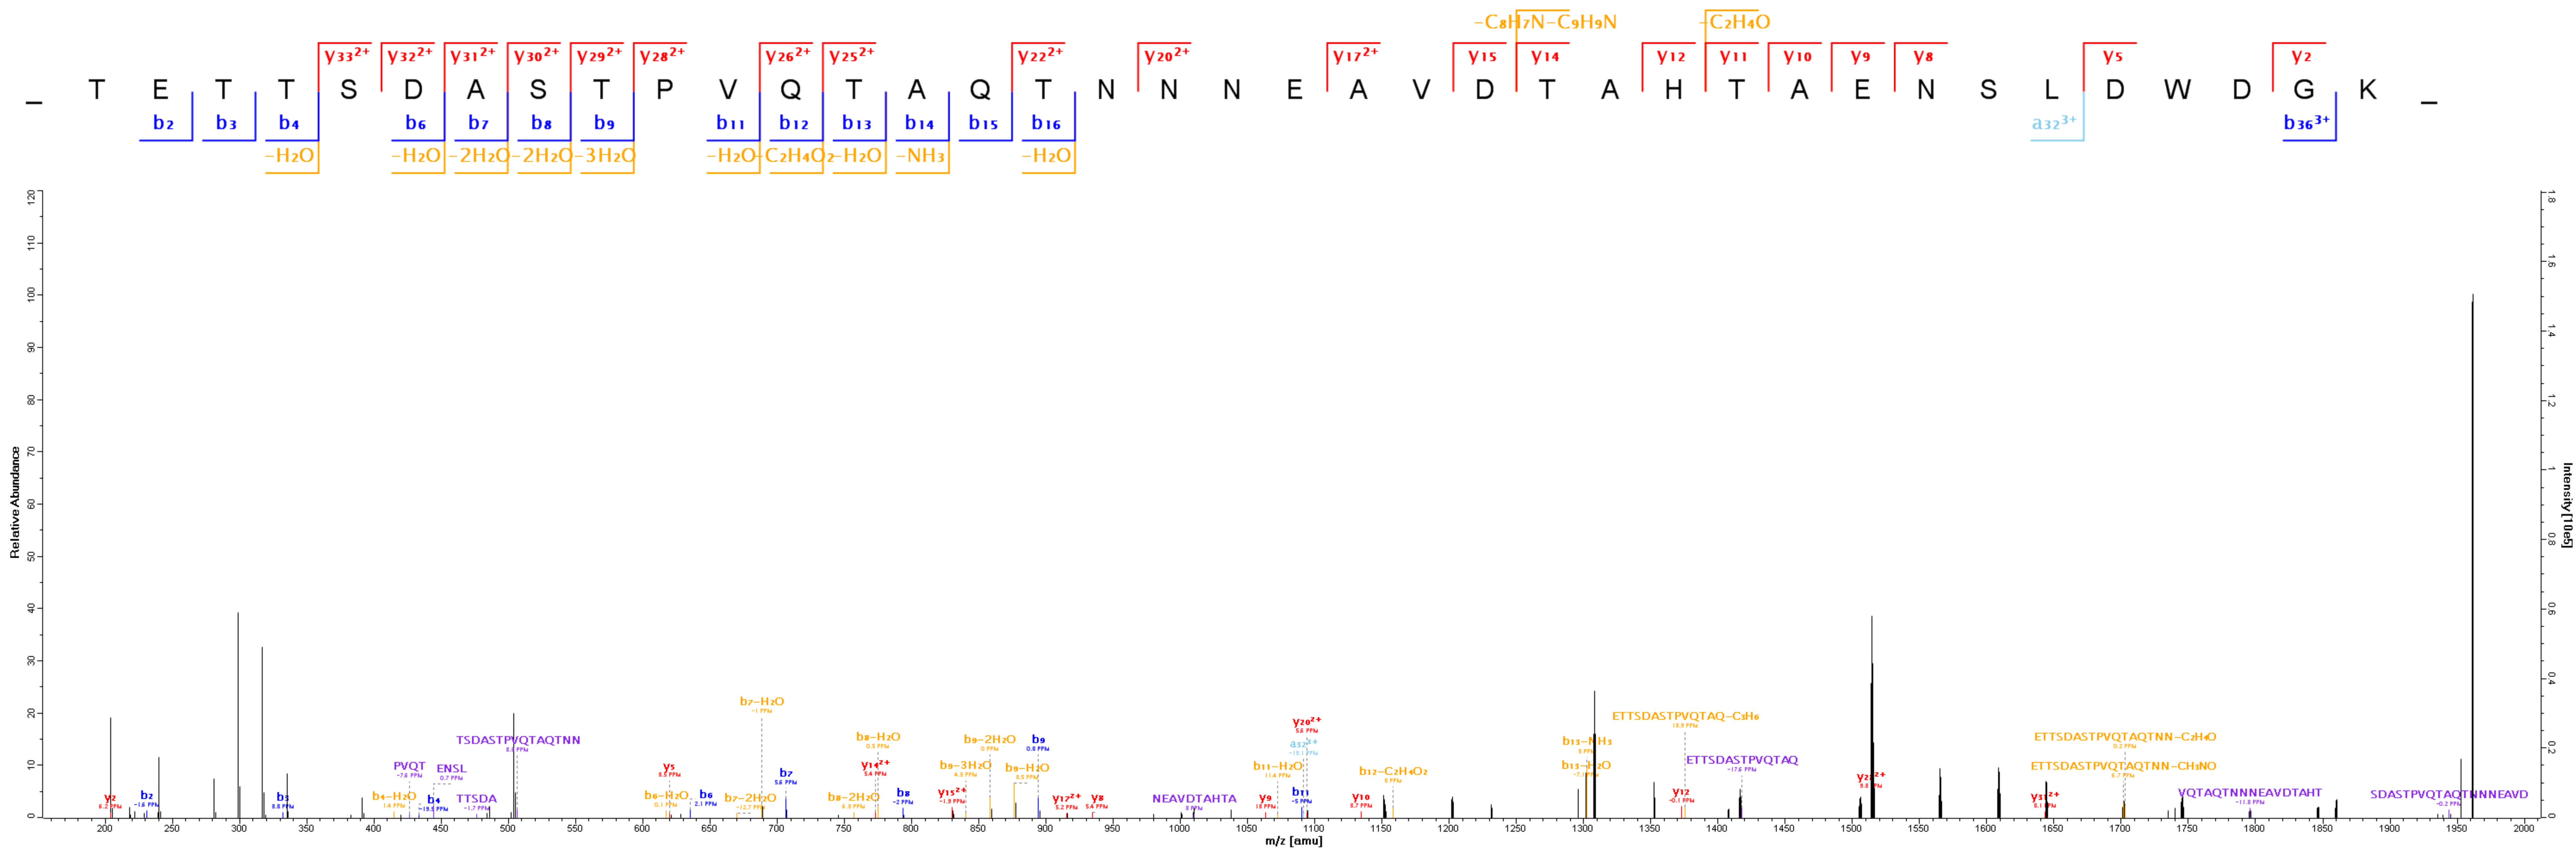

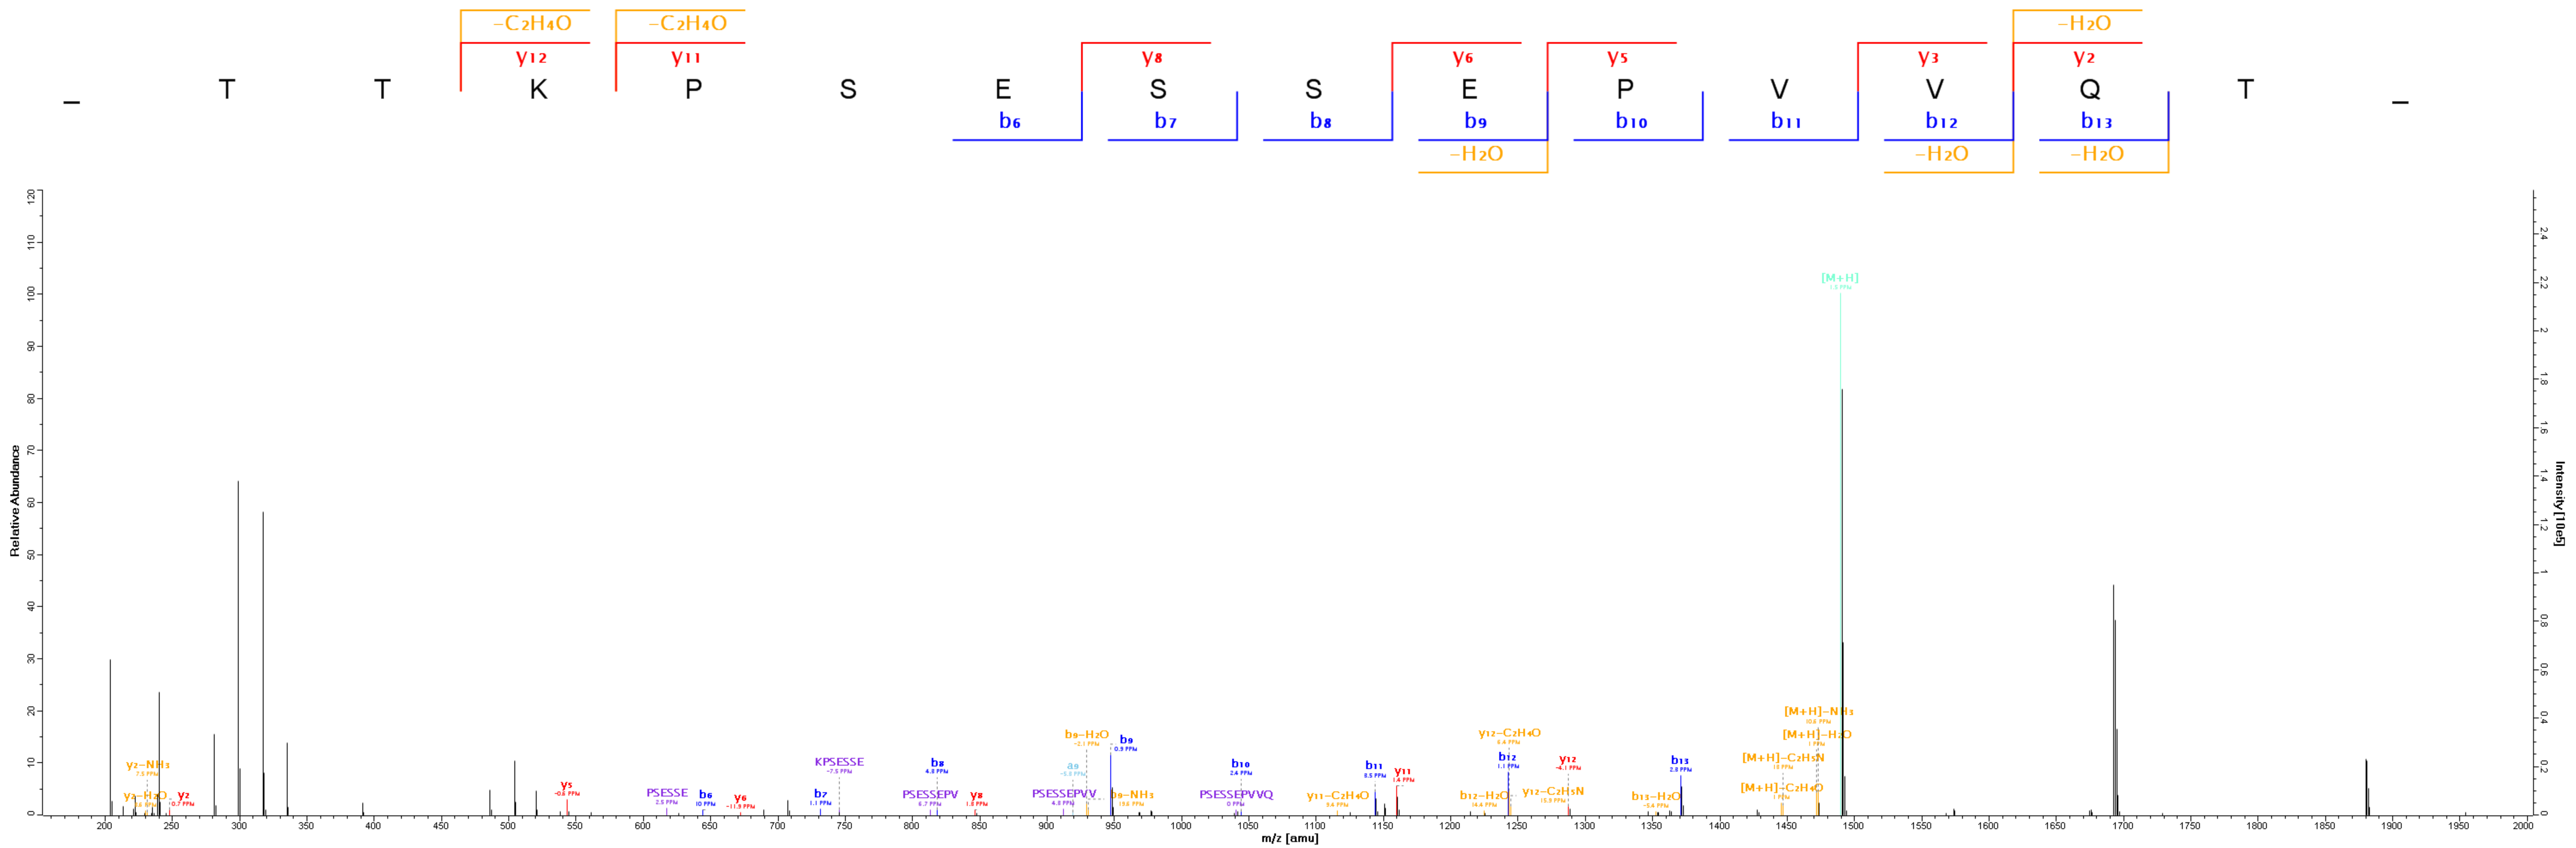

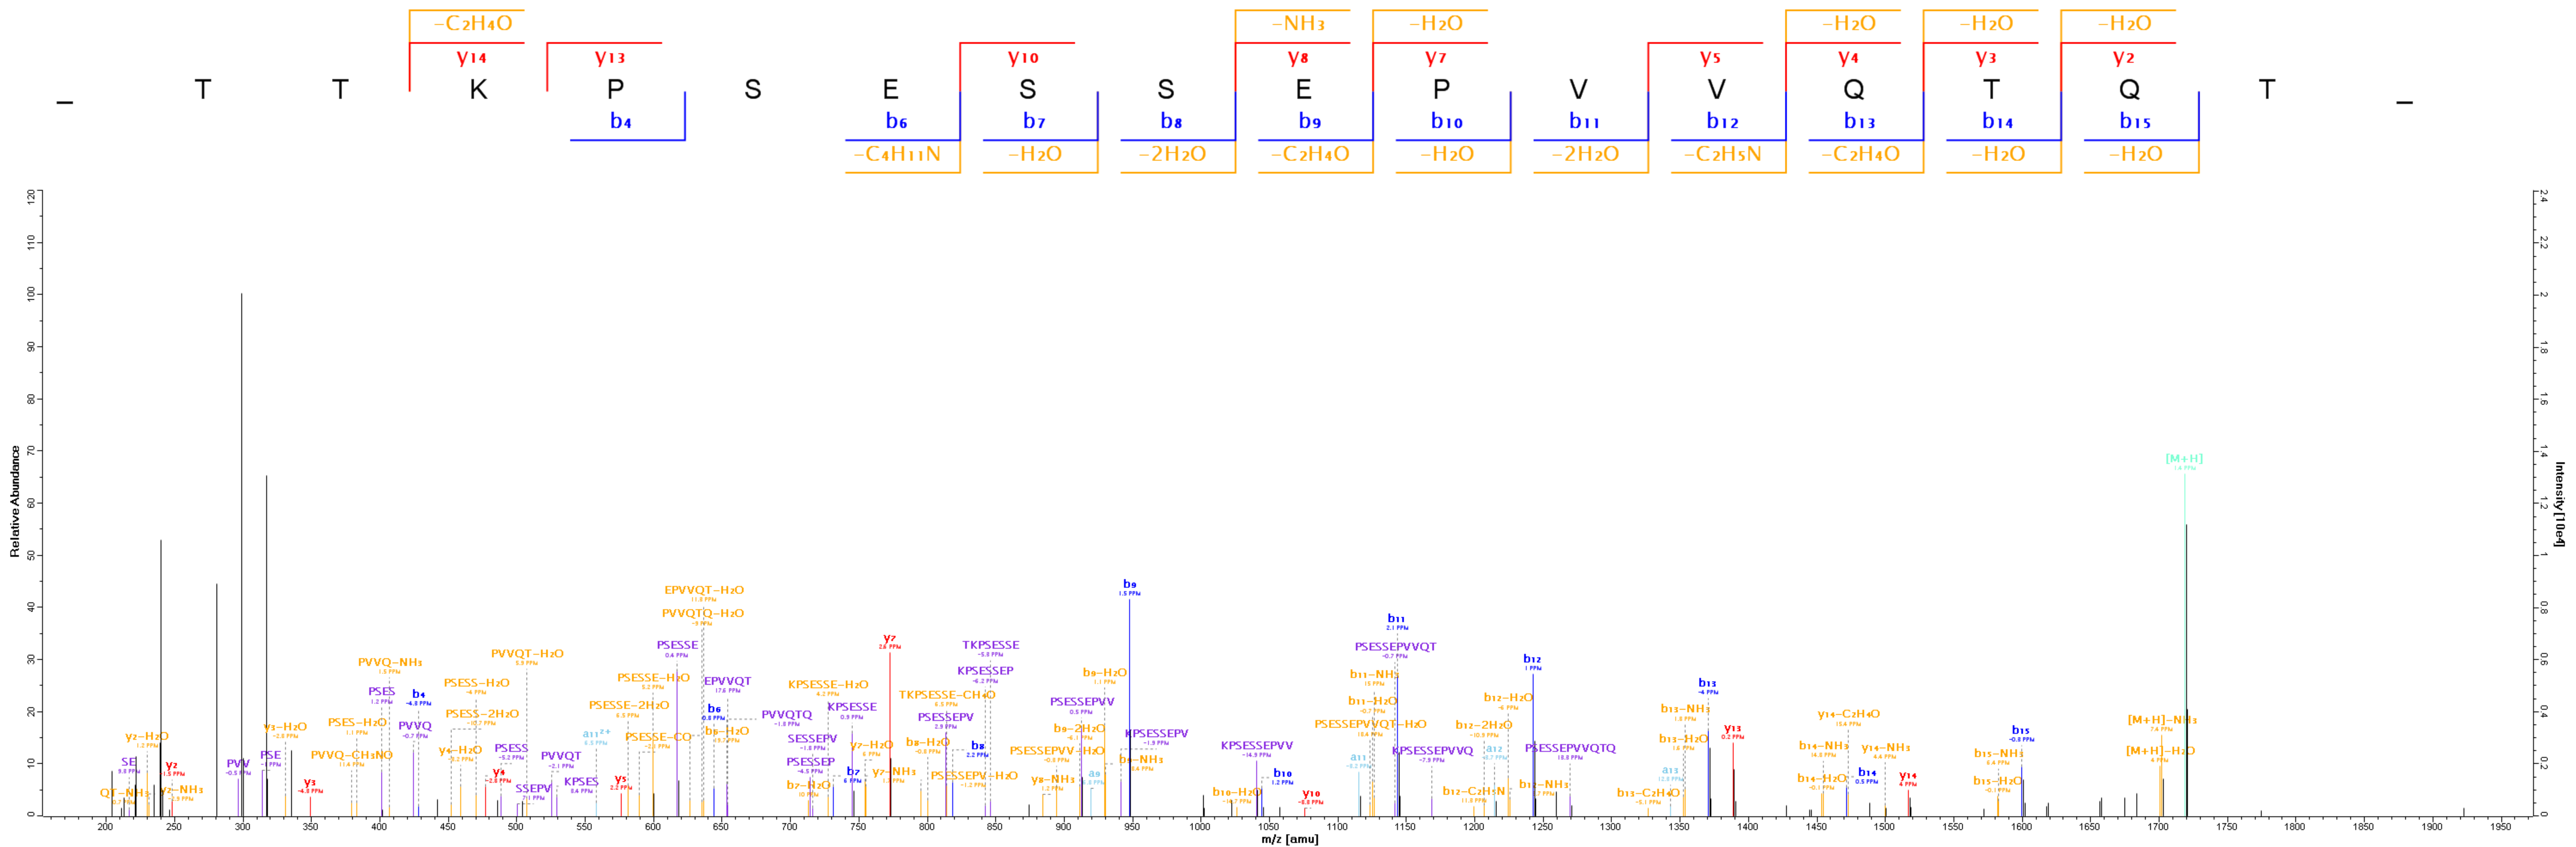

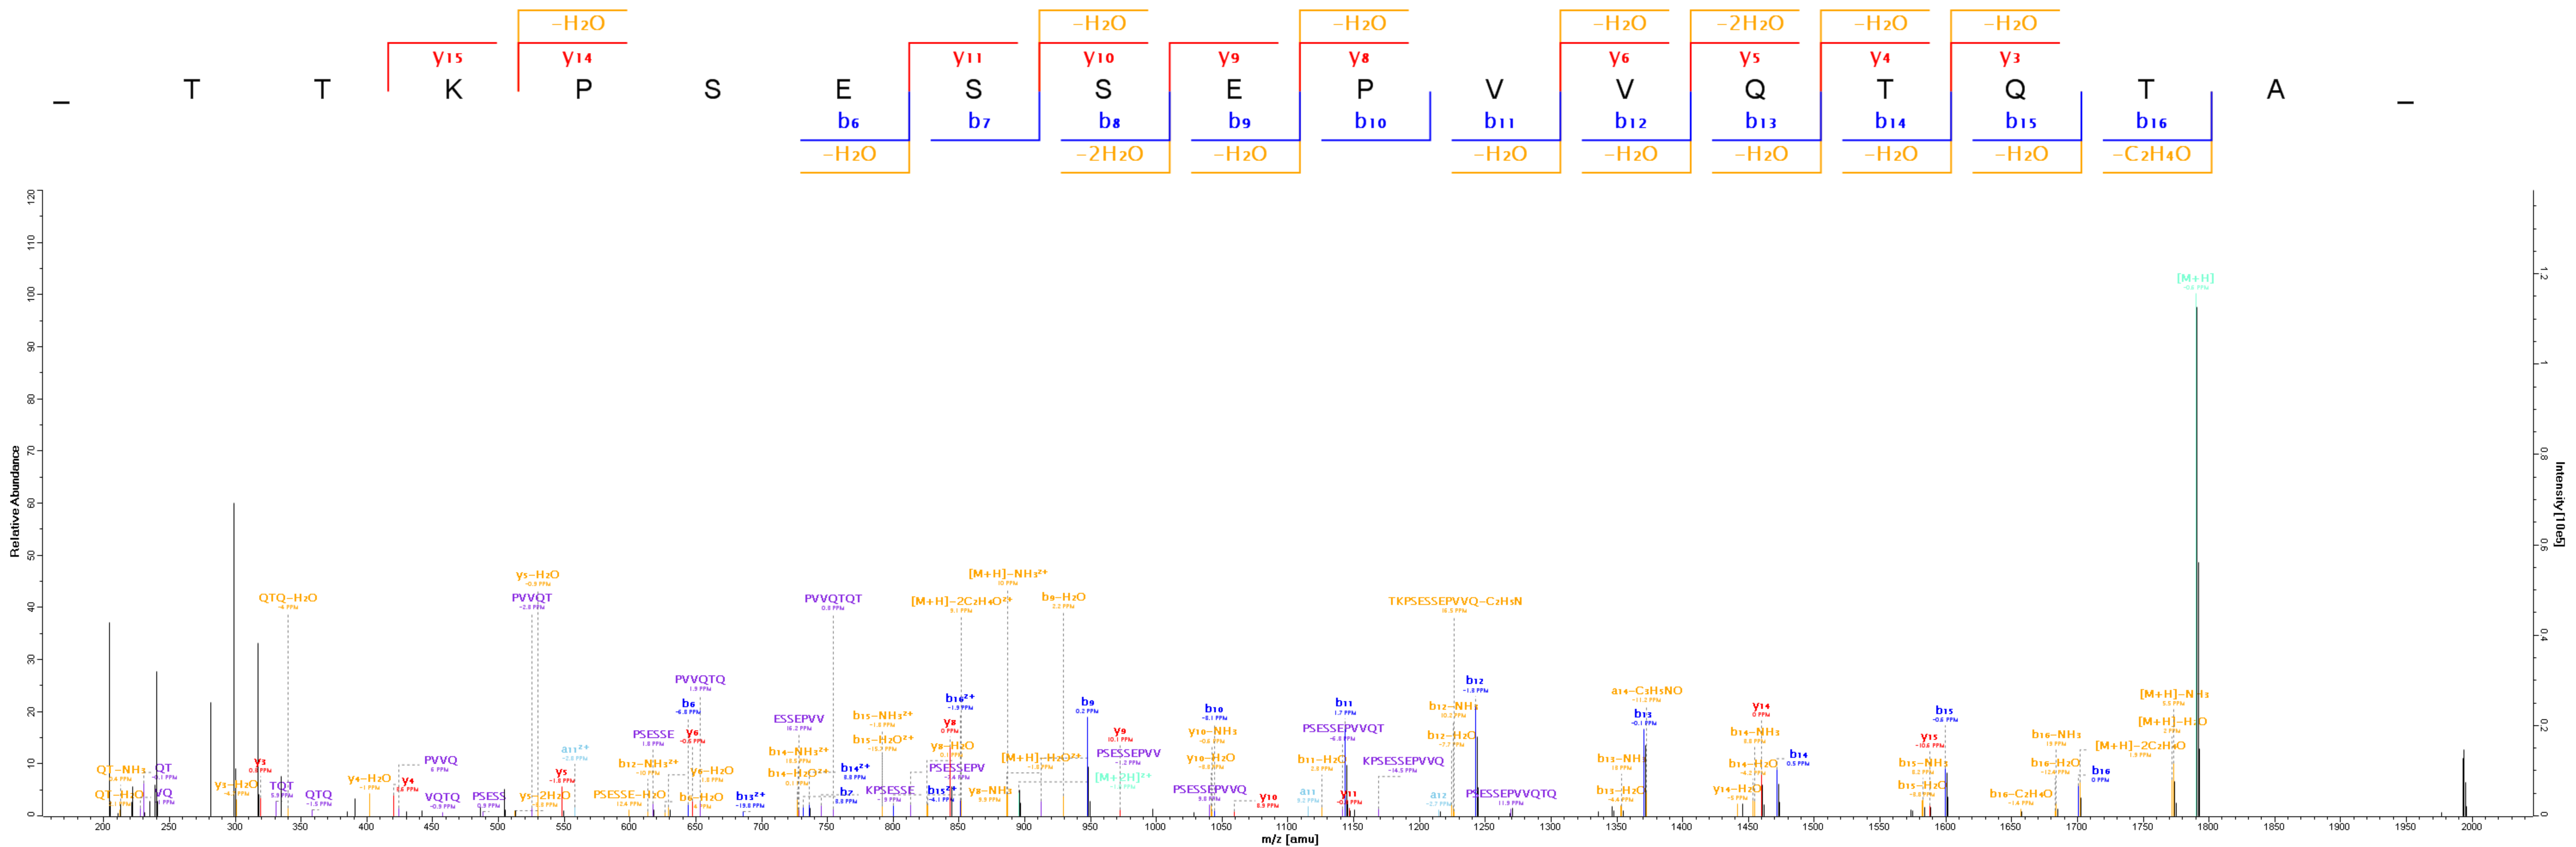



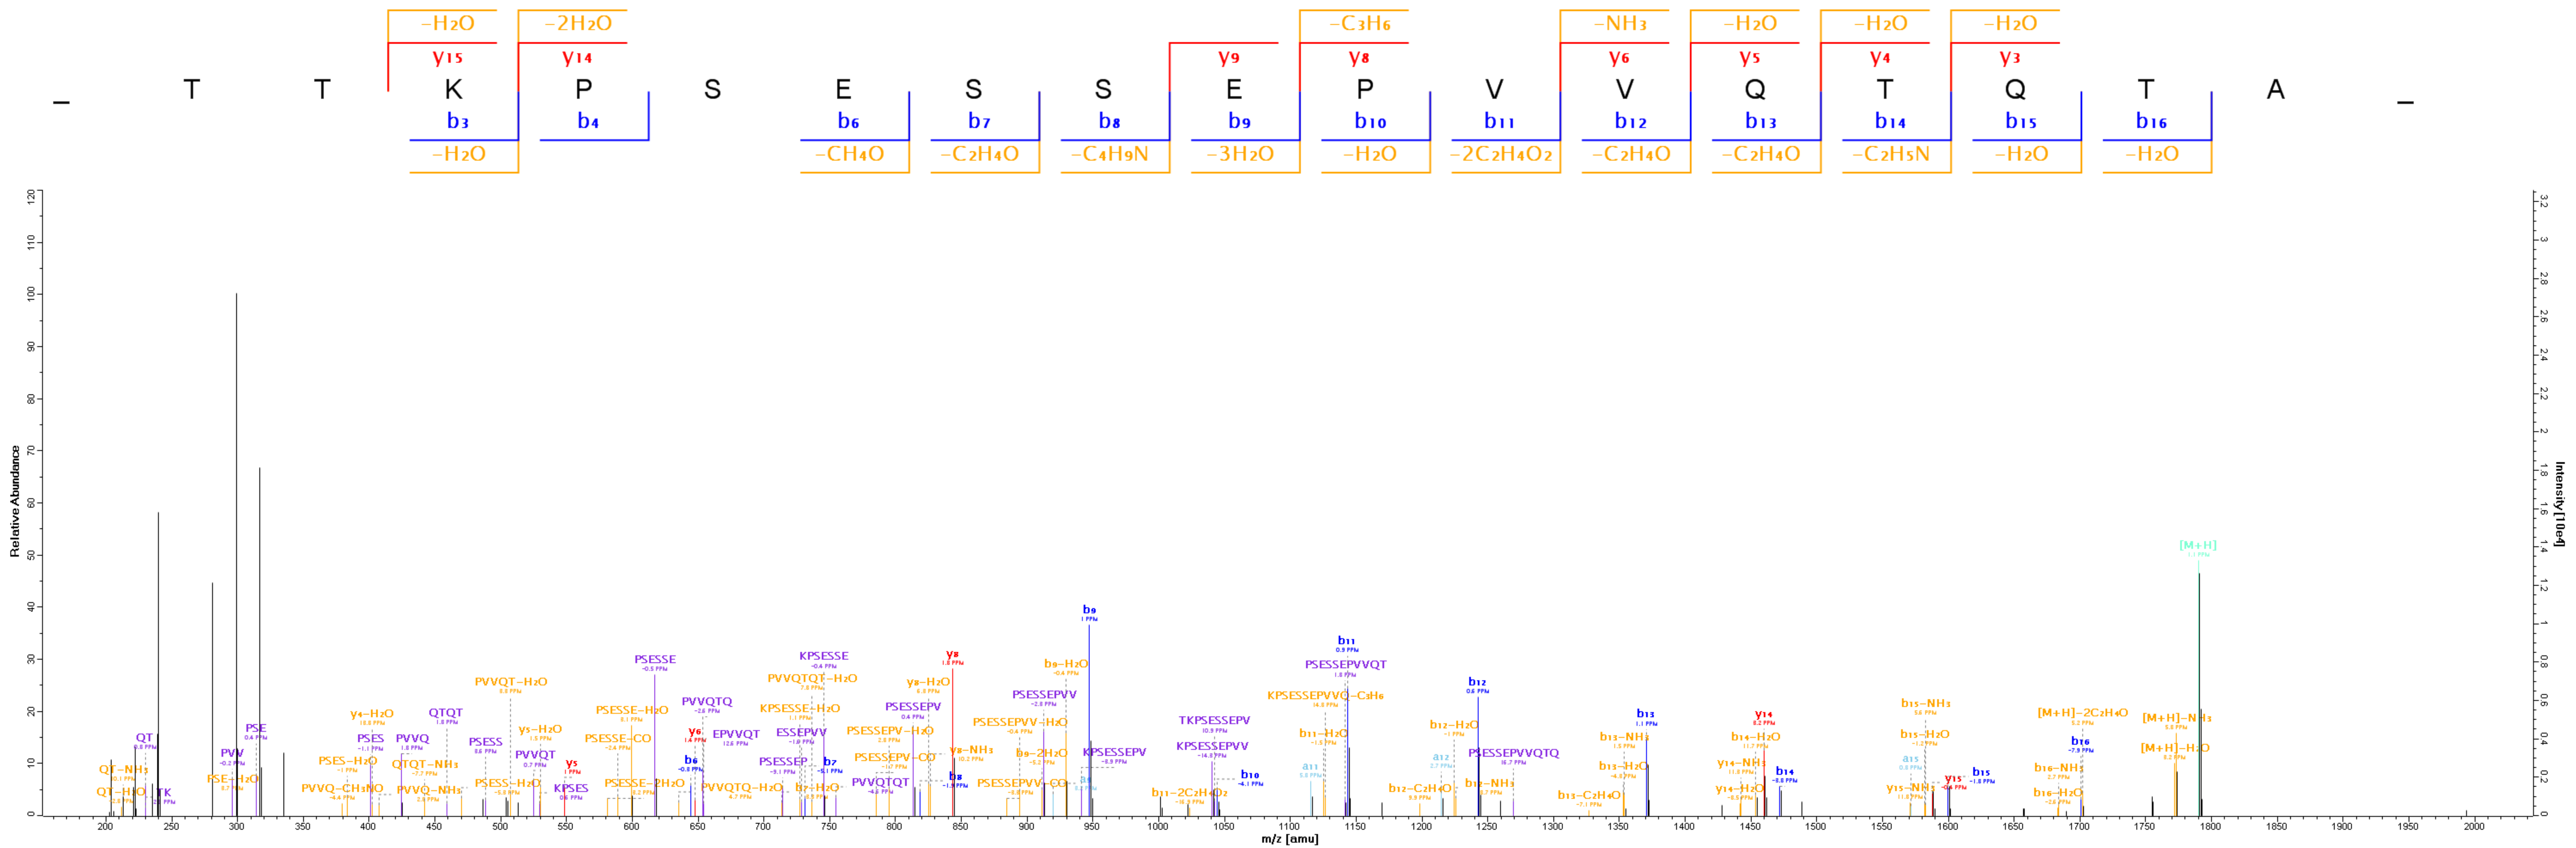



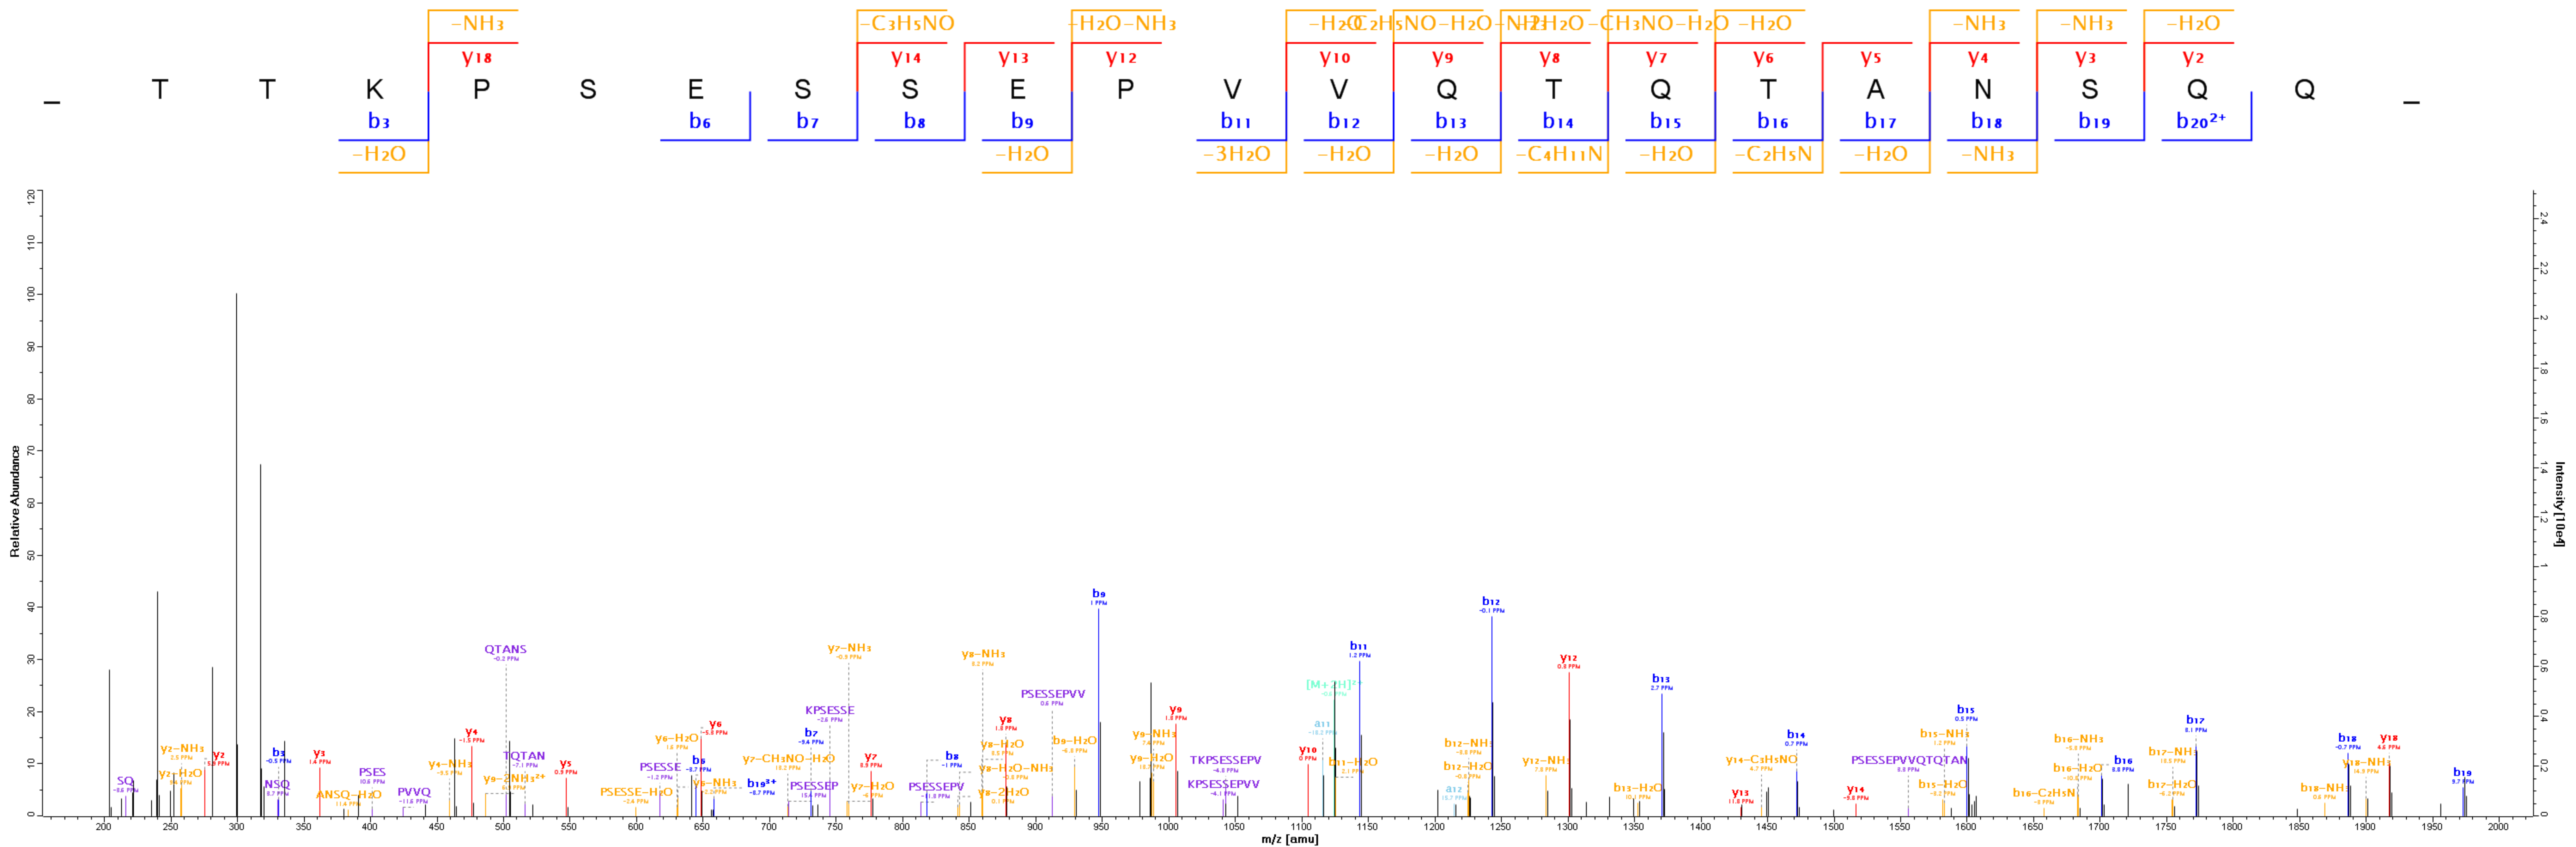

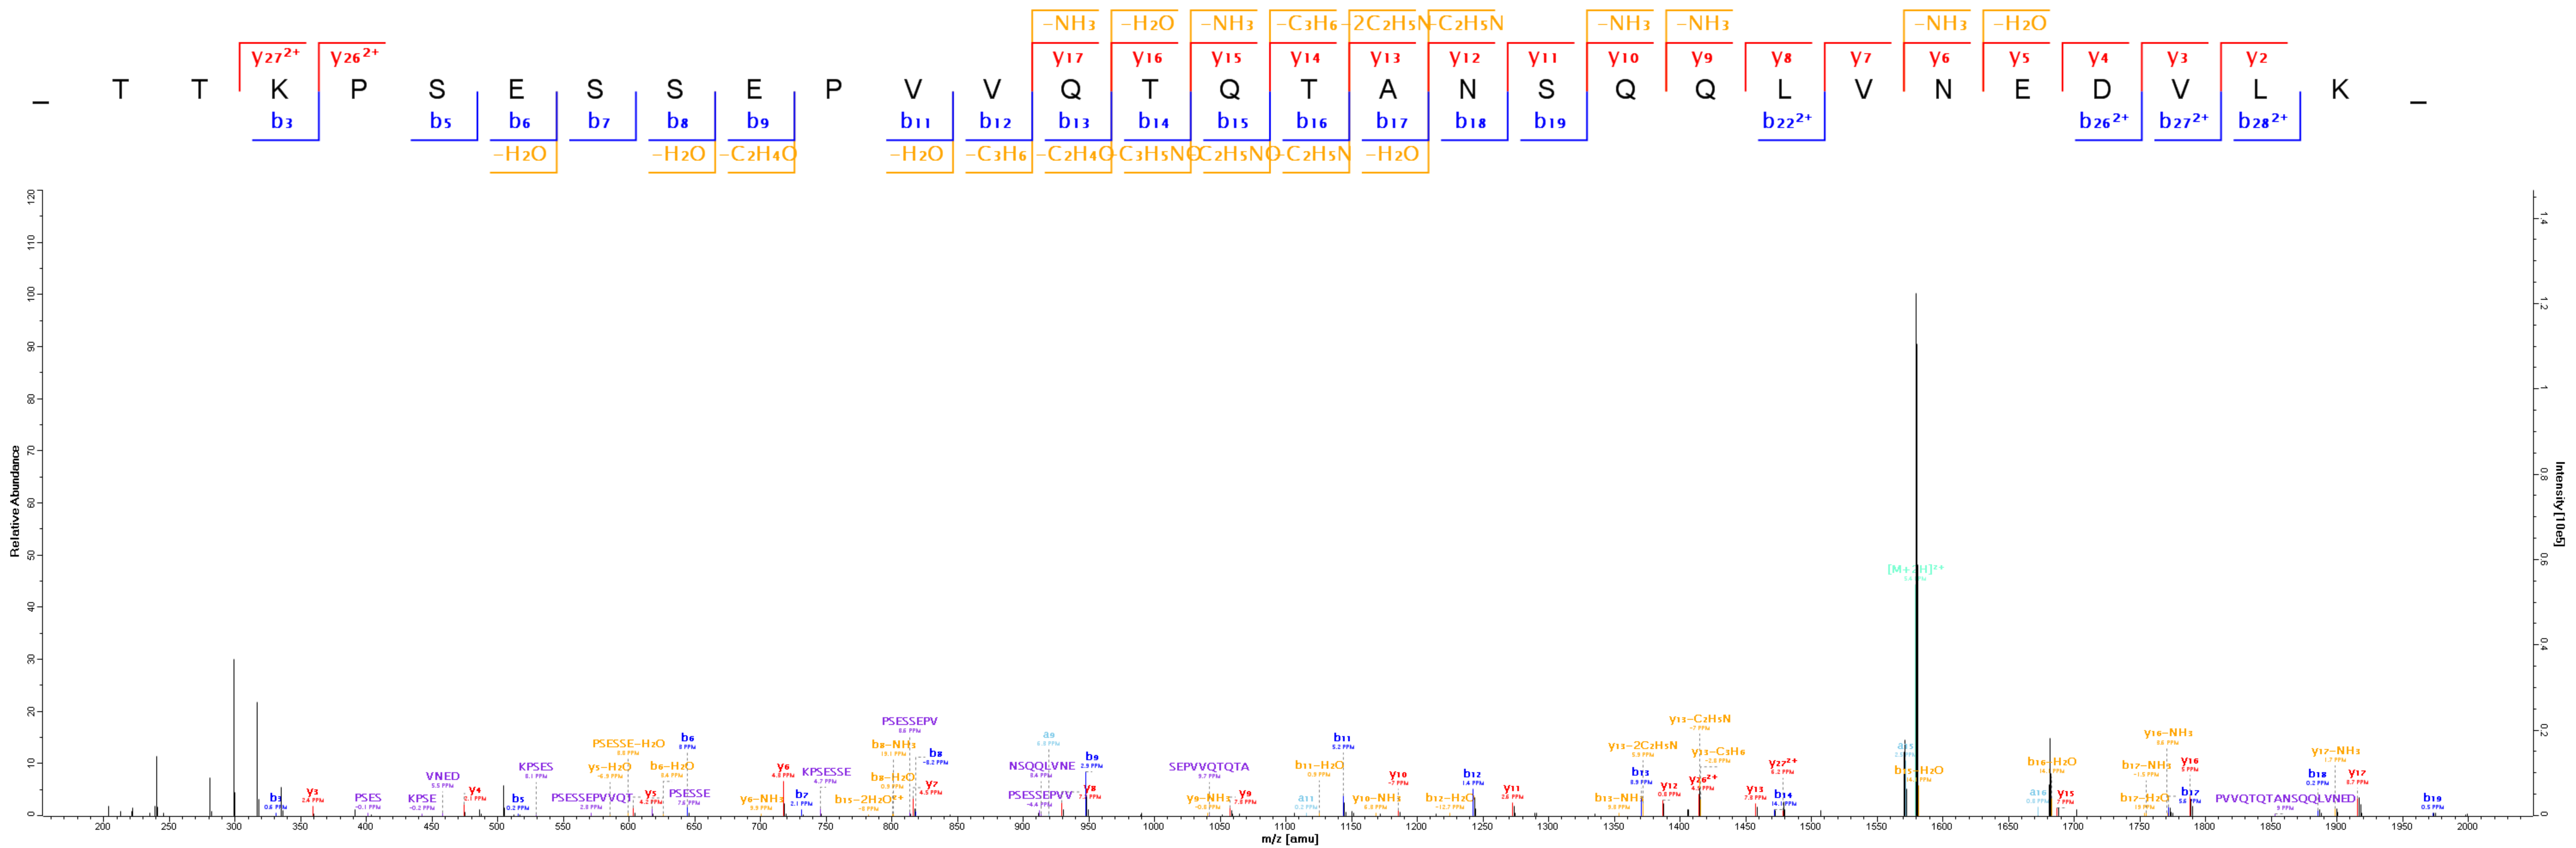

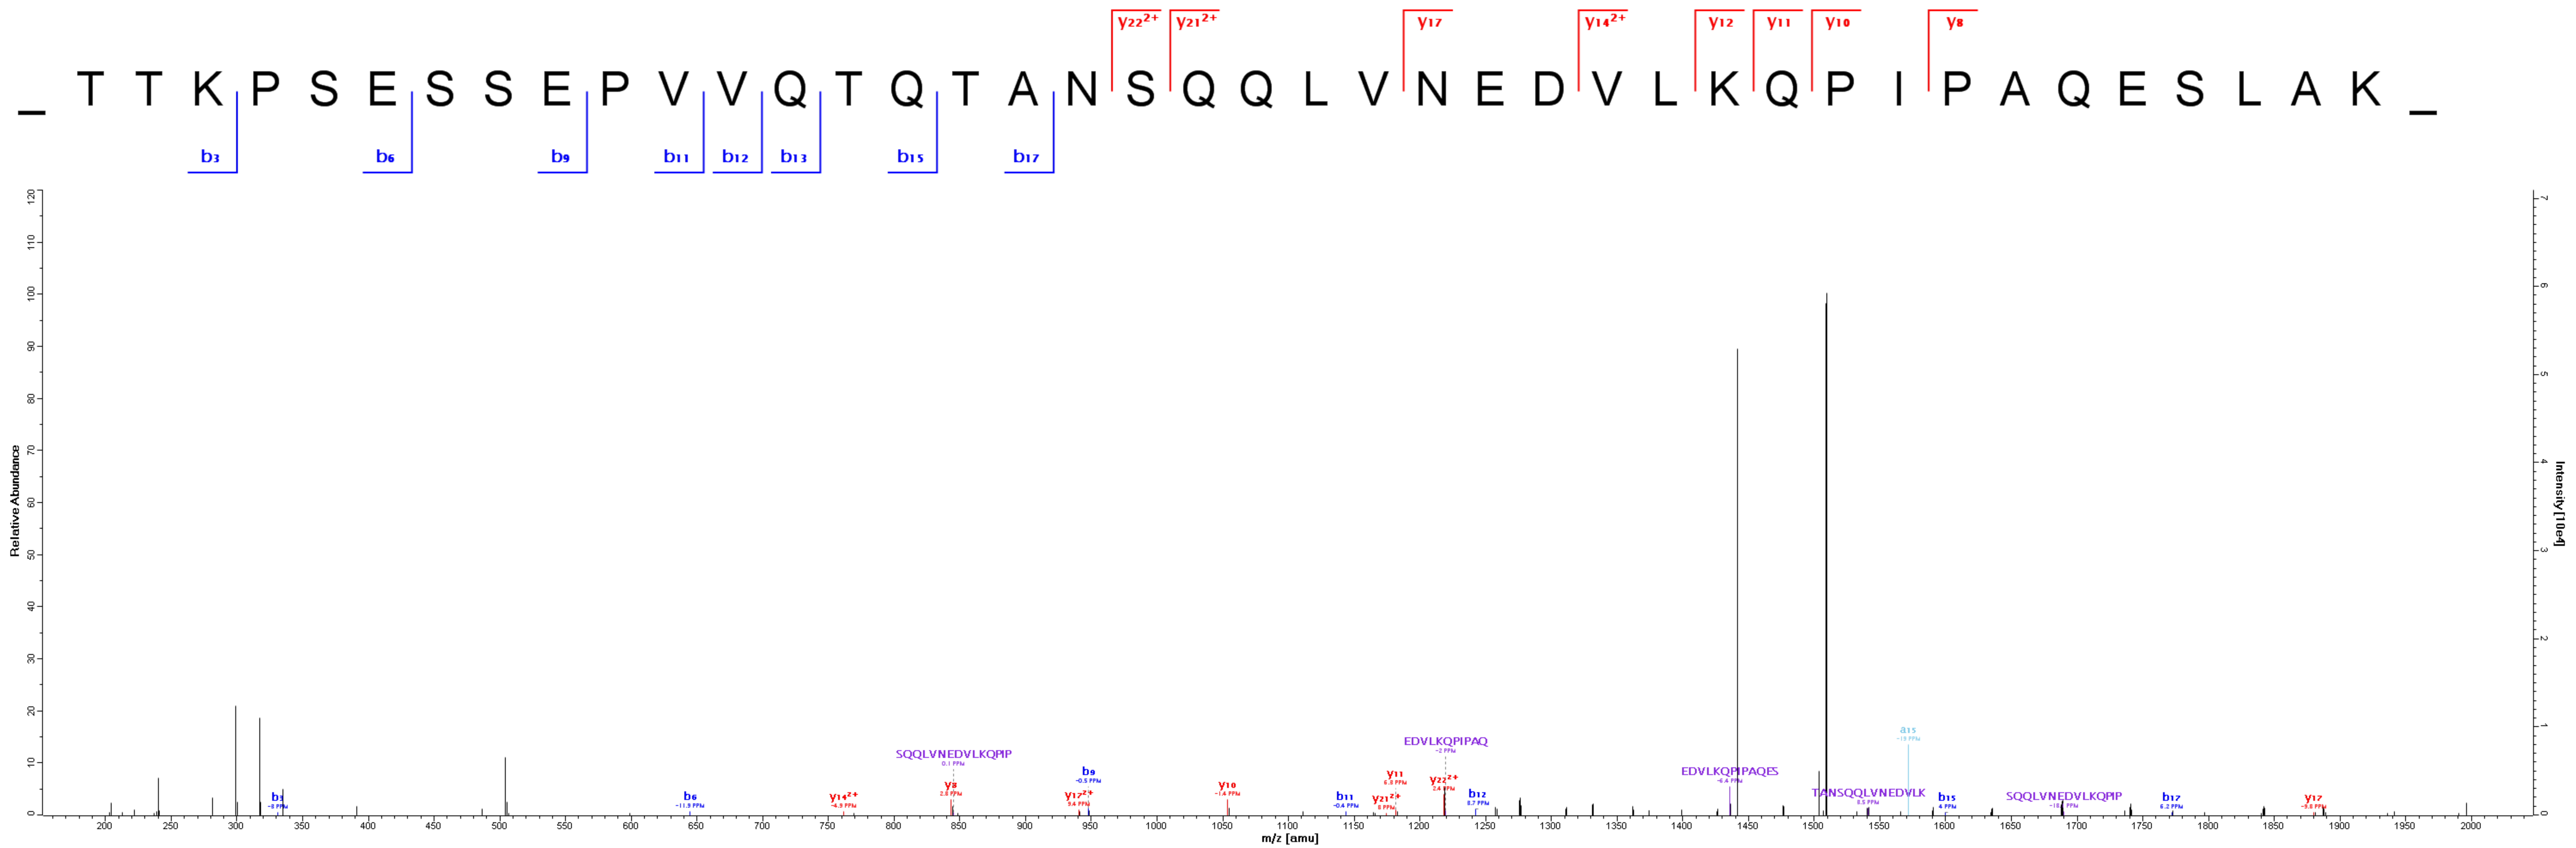

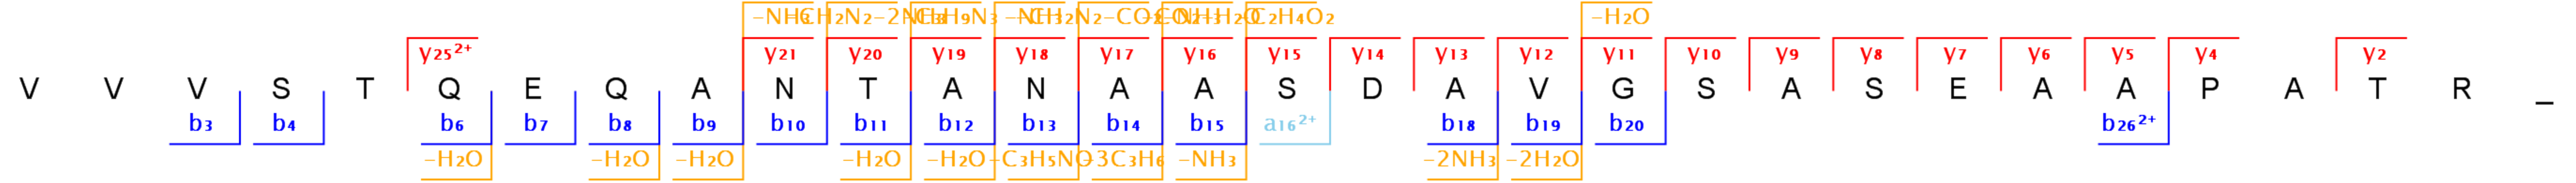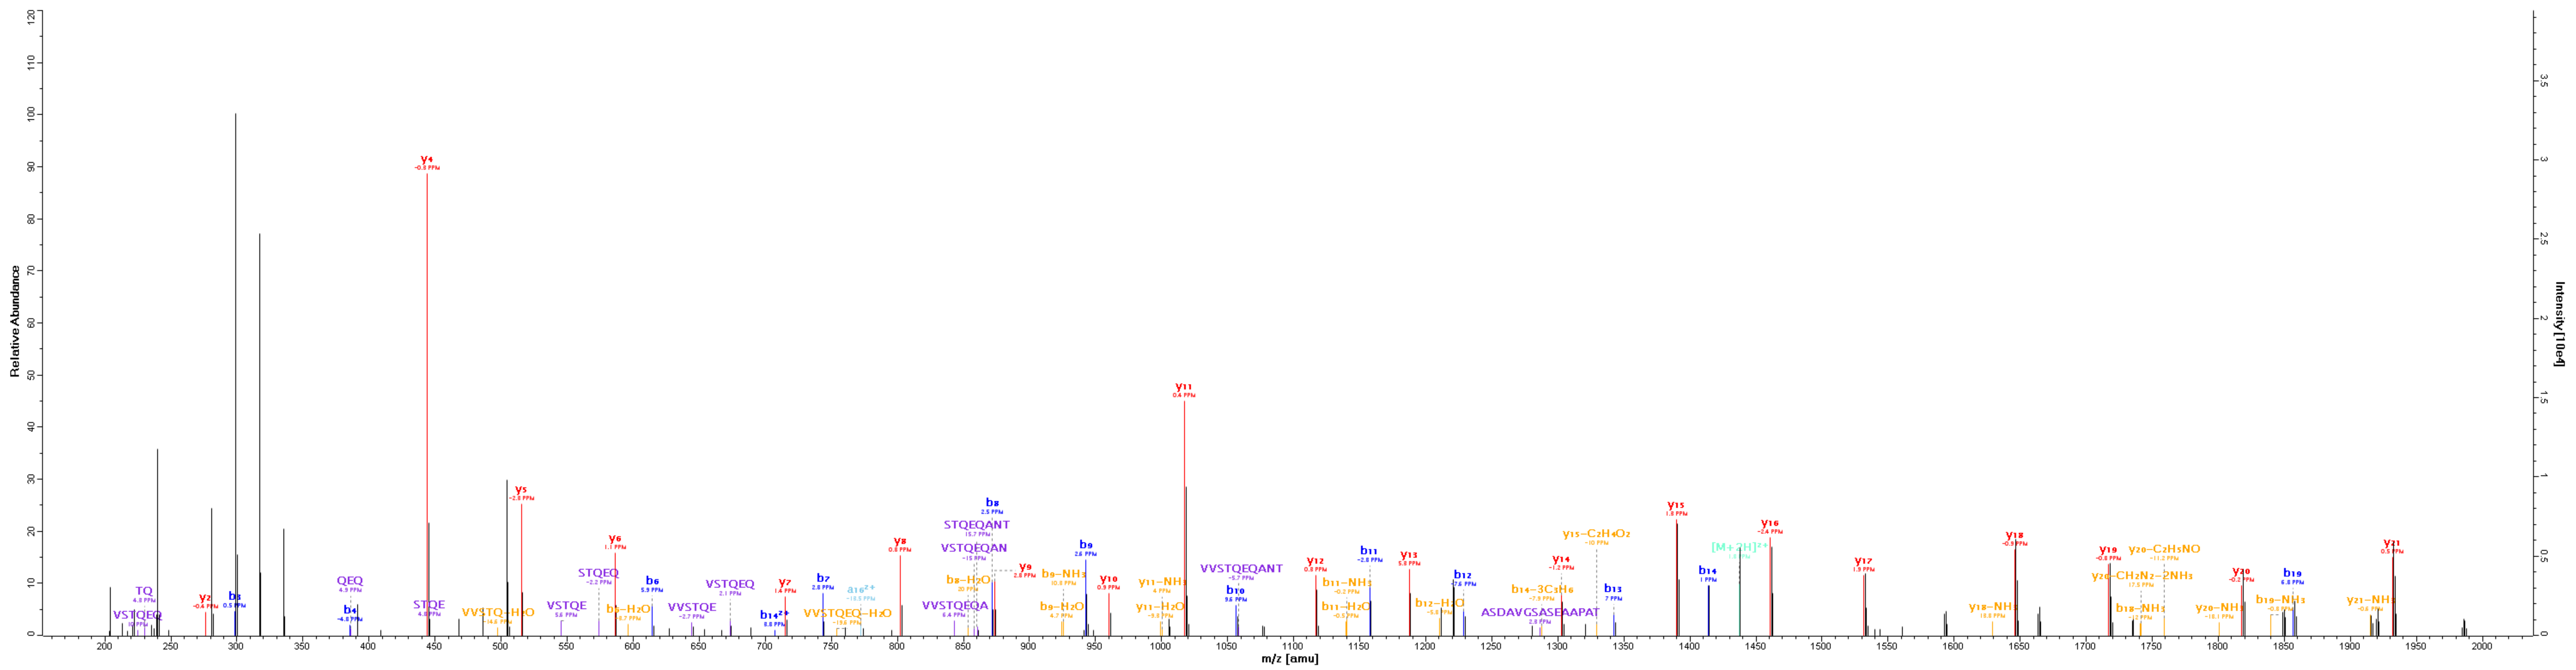

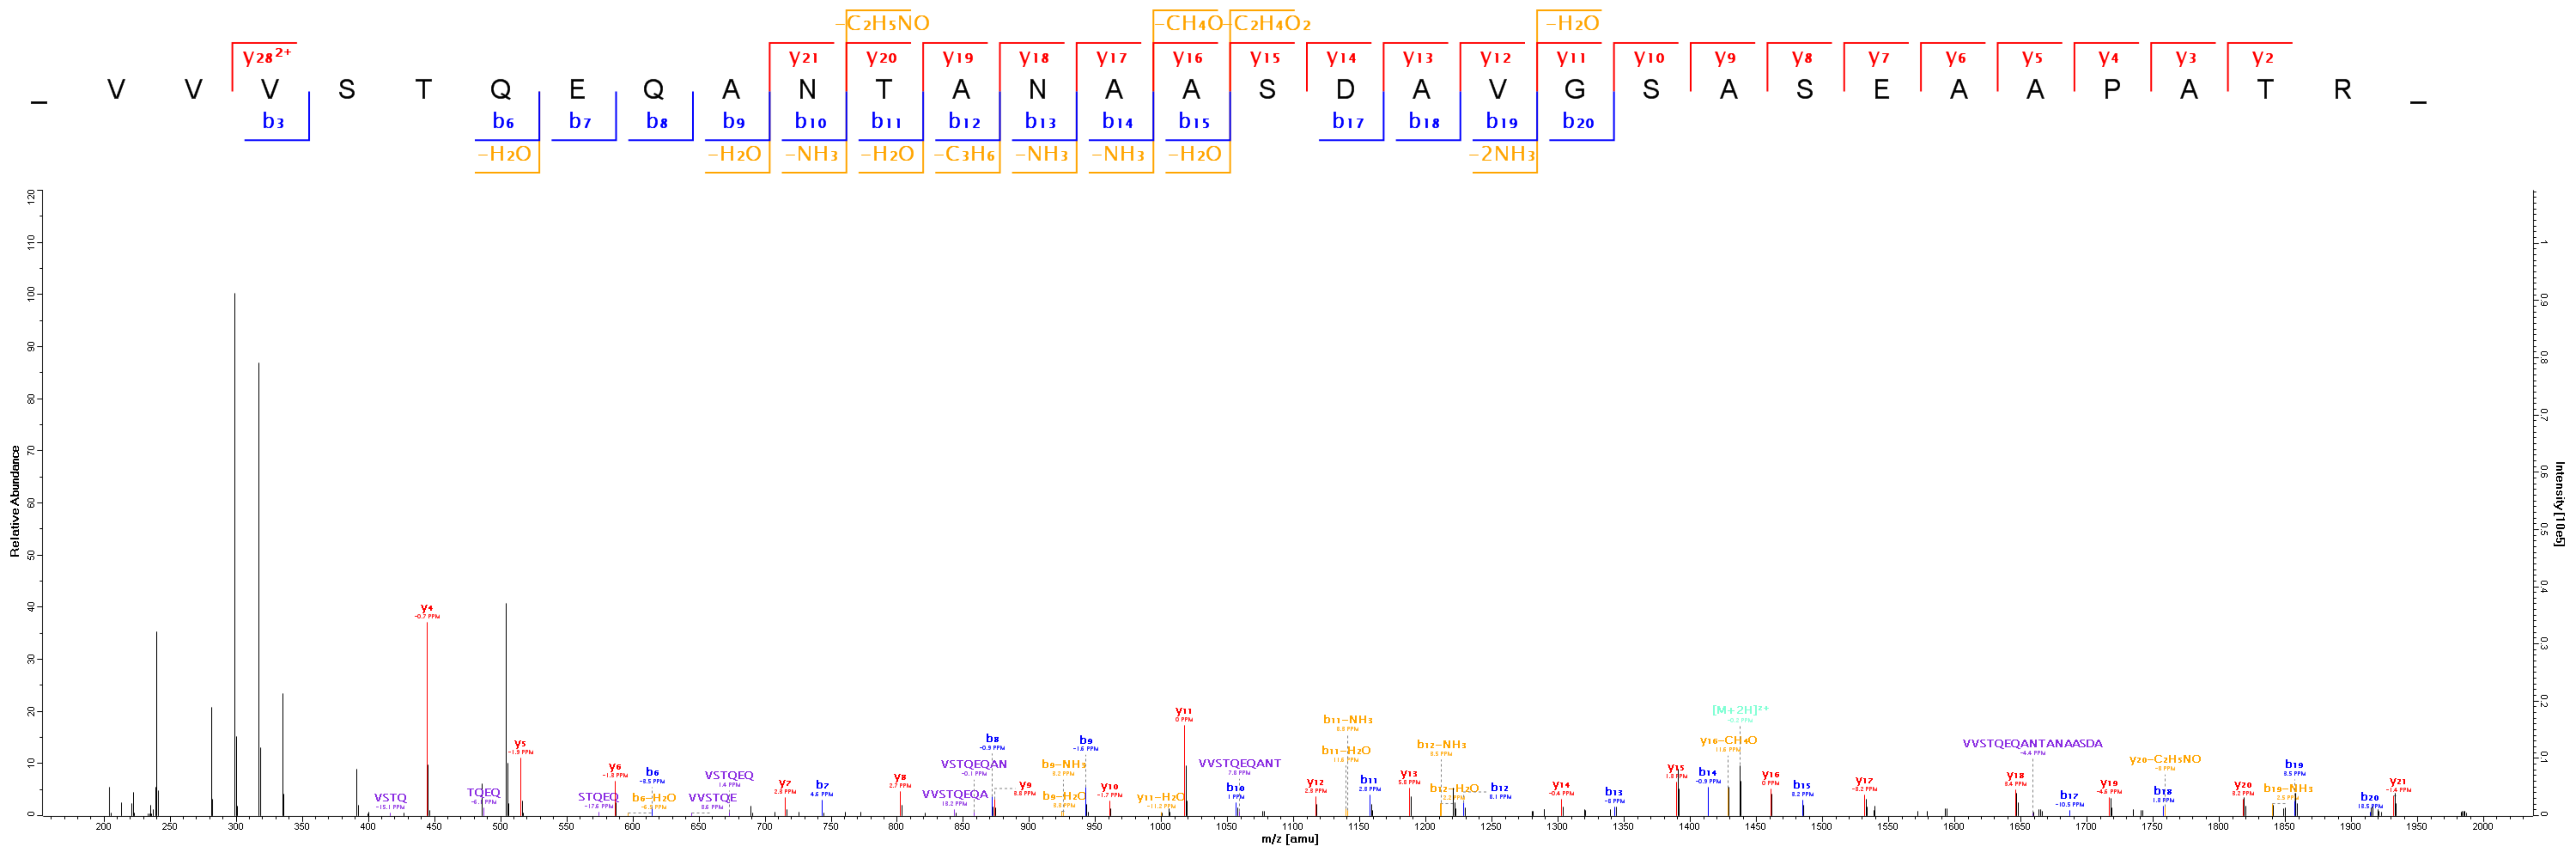

Supplement: supp_M114.038315_mcp.M114.038315-8.pdf [file supp_M114.038315_mcp.M114.038315-8.pdf]
