# Supplementary material
Source: PubMed Central journal article supplement (PMC4159654)

**Supplementary Table 8: HCD identified *Acinetobacter baumannii* (strain ATCC17978) glycopeptides**

| Uniprot number | parent mass | Precursor MH+ | charge | glycan mass | glycan composition                  | peptide mass | Sequence                                                                    | Mascot Ion score | Page |
|----------------|-------------|---------------|--------|-------------|-------------------------------------|--------------|-----------------------------------------------------------------------------|------------------|------|
| A3M265_ACIBT   | 585.62      | 1754.85       | 3      | 785.28      | HexNAc-Hex <sub>2</sub> -258        | 969.57       | <sup>301</sup> AKPASTPAVK <sup>310</sup>                                    | 21               | 2    |
| A3M265_ACIBT   | 979.47      | 1957.93       | 2      | 988.36      | HexNAc-Hex <sub>2</sub> -HexNAc-258 | 969.57       | <sup>301</sup> AKPASTPAVK <sup>310</sup>                                    | 49               | 3    |
| A7FBI1_ACIBT   | 1119.52     | 3356.53       | 3      | 988.36      | HexNAc-Hex <sub>2</sub> -HexNAc-258 | 2367.17      | <sup>29</sup> EEEQDKVETAVSEPQPQKPAK <sup>49</sup>                           | 45               | 4    |
| A7FB63_ACIBT   | 1044.47     | 4174.84       | 4      | 988.36      | HexNAc-Hex <sub>2</sub> -HexNAc-258 | 3186.48      | <sup>48</sup> SAGDQAASDIATATDNASAKIDAAADHAADATAK <sup>81</sup>              | 34               | 5    |
| A7FB63_ACIBT   | 1427.11     | 2853.22       | 2      | 988.37      | HexNAc-Hex <sub>2</sub> -HexNAc-258 | 1864.85      | <sup>48</sup> SAGDQAASDIATATDNASAK <sup>67</sup>                            | 59               | 6    |
| A3M3X9_ACIBT   | 1352.41     | 5406.62       | 4      | 988.40      | HexNAc-Hex <sub>2</sub> -HexNAc-258 | 4418.21      | <sup>203</sup> AASGVEAAAAPATLTLSTDDKGAVSQCQAGIGDQGFLATLQTQVK <sup>247</sup> | 37               | 7    |
| A7FB63_ACIBT   | 1058.48     | 4230.90       | 4      | 1044.42     | HexNAc-Hex <sub>2</sub> -HexNAc-314 | 3186.48      | <sup>48</sup> SAGDQAASDIATATDNASAKIDAAADHAADATAK <sup>81</sup>              | 40               | 8    |
| A7FB63_ACIBT   | 979.42      | 2936.25       | 3      | 1071.40     | HexNAc-Hex-HexNAc <sub>2</sub> -300 | 1864.85      | <sup>48</sup> SAGDQAASDIATATDNASAK <sup>67</sup>                            | 71               | 9    |
| A7FB63_ACIBT   | 1026.76     | 3078.27       | 3      | 1213.45     | 386-Hex <sub>2</sub> -HexNAc-300    | 1864.85      | <sup>48</sup> SAGDQAASDIATATDNASAK <sup>67</sup>                            | 72               | 10   |
| A7FB63_ACIBT   | 1100.74     | 4399.93       | 4      | 1213.45     | 386-Hex <sub>2</sub> -HexNAc-300    | 3186.48      | <sup>48</sup> SAGDQAASDIATATDNASAKIDAAADHAADATAK <sup>81</sup>              | 25               | 11   |
| A7FB63_ACIBT   | 898.05      | 2692.15       | 3      | 827.30      | HexNAc-Hex <sub>2</sub> -300        | 1864.85      | <sup>48</sup> SAGDQAASDIATATDNASAK <sup>67</sup>                            | 74               | 12   |

**Supplementary table 8:** Identifications are grouped according to the corresponding Uniprot accession number of *A. baumannii* ATCC17978. The parent m/z, charge state, deconvoluted mass, glycan mass, glycan composition, peptide mass, peptide sequence and mascot ion score are provided for each identified glycopeptide. All identified glycopeptide HCD spectra are provided and are available on the designated pages

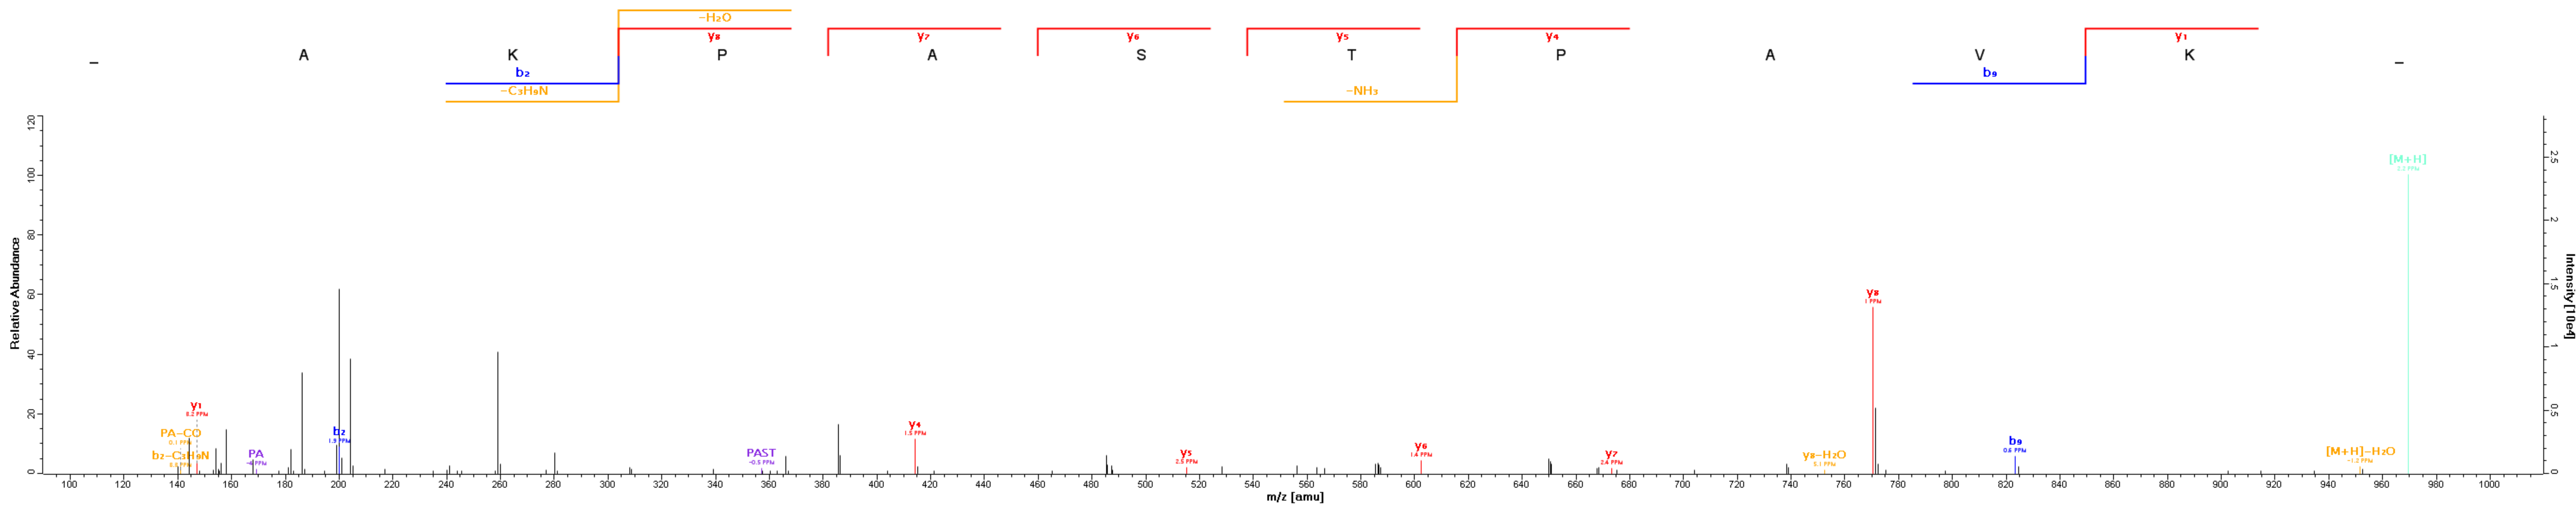

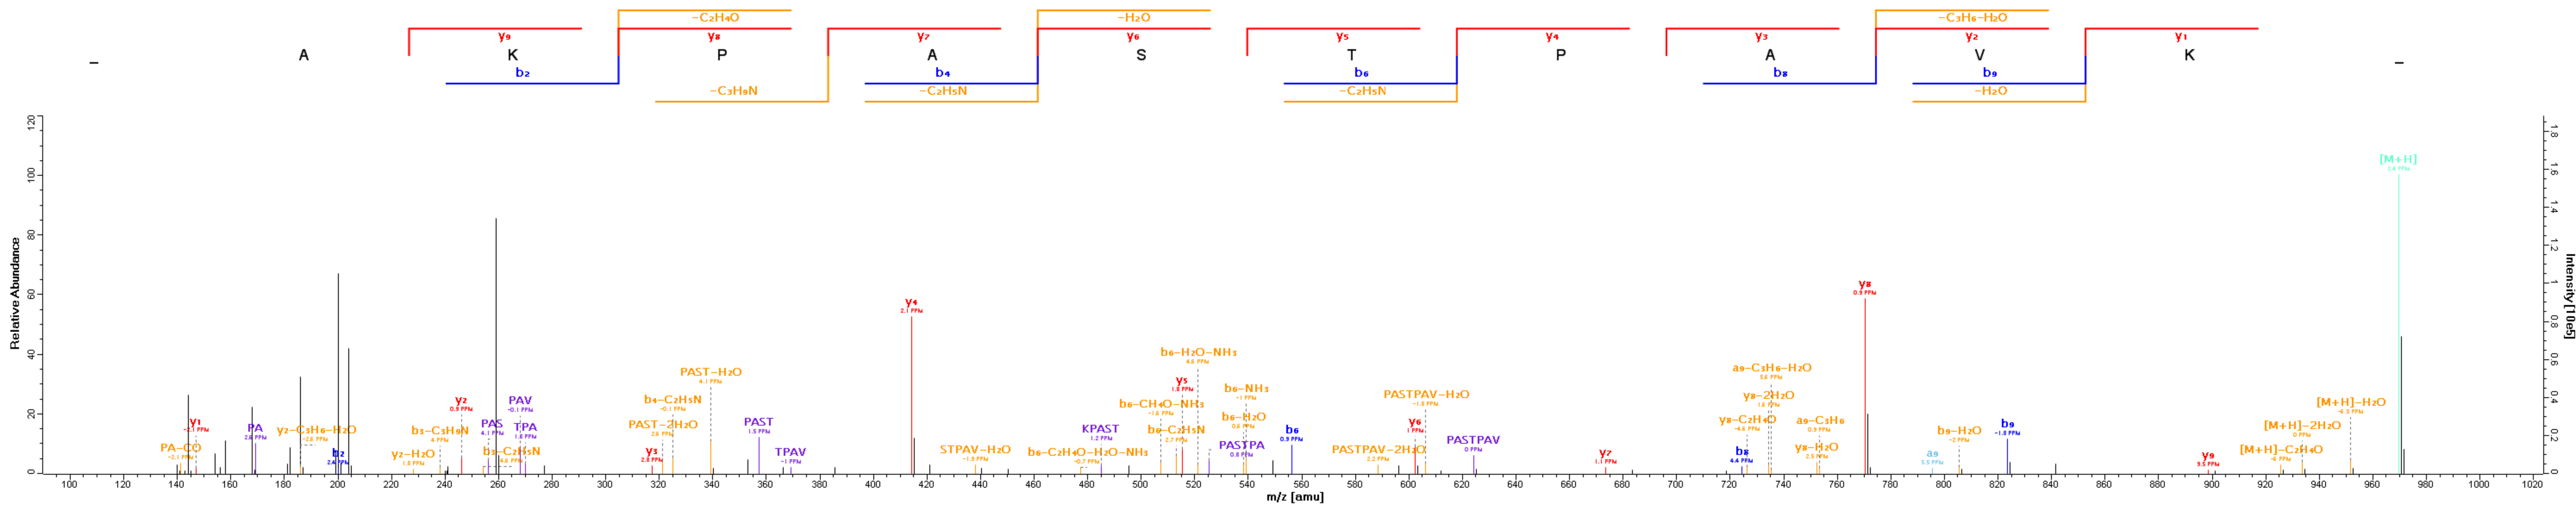

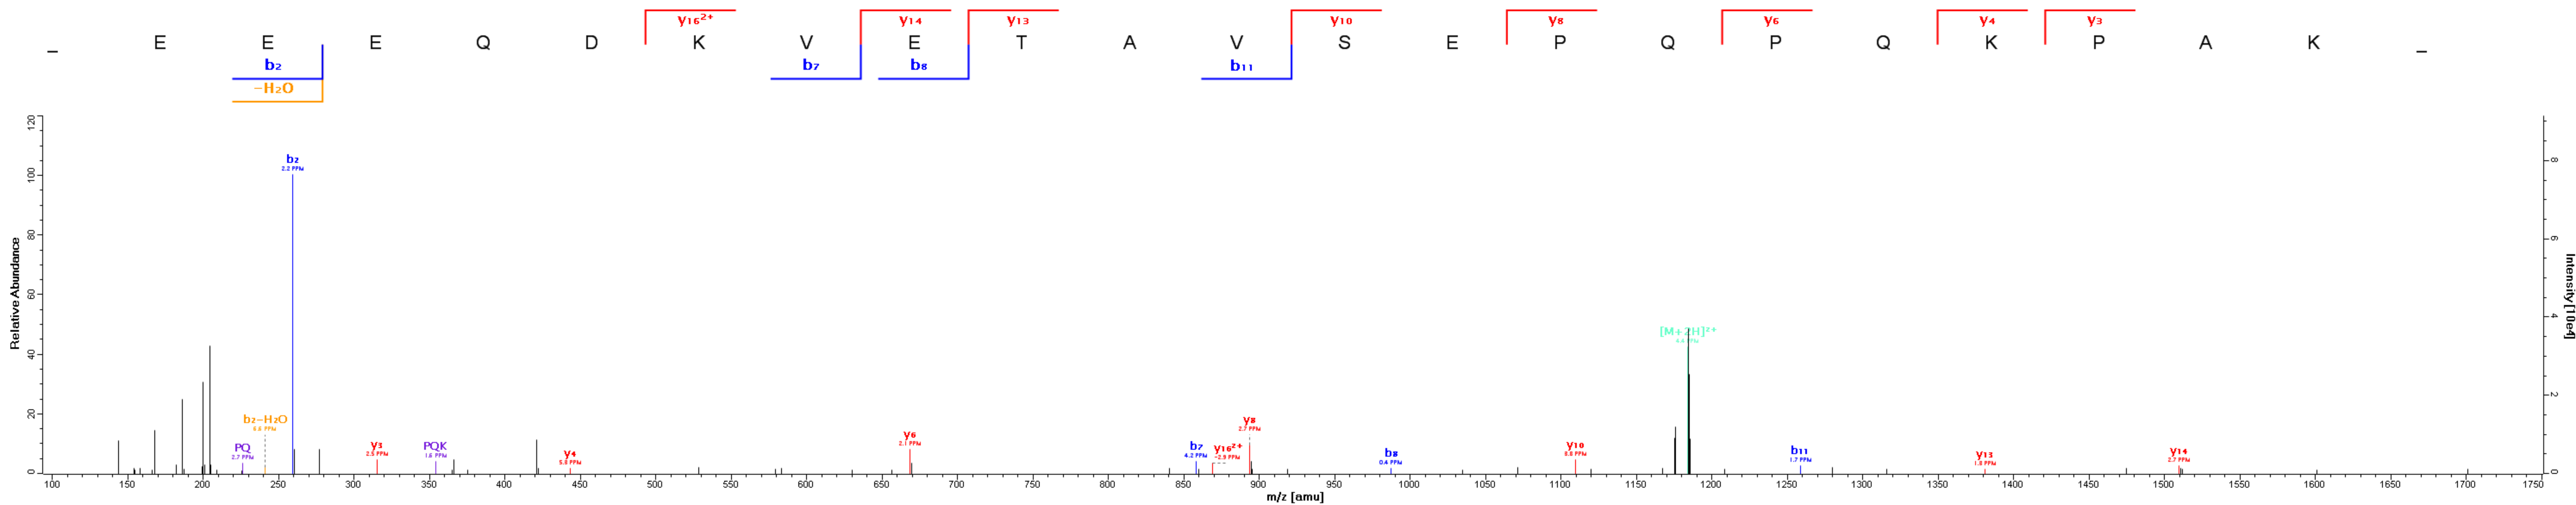

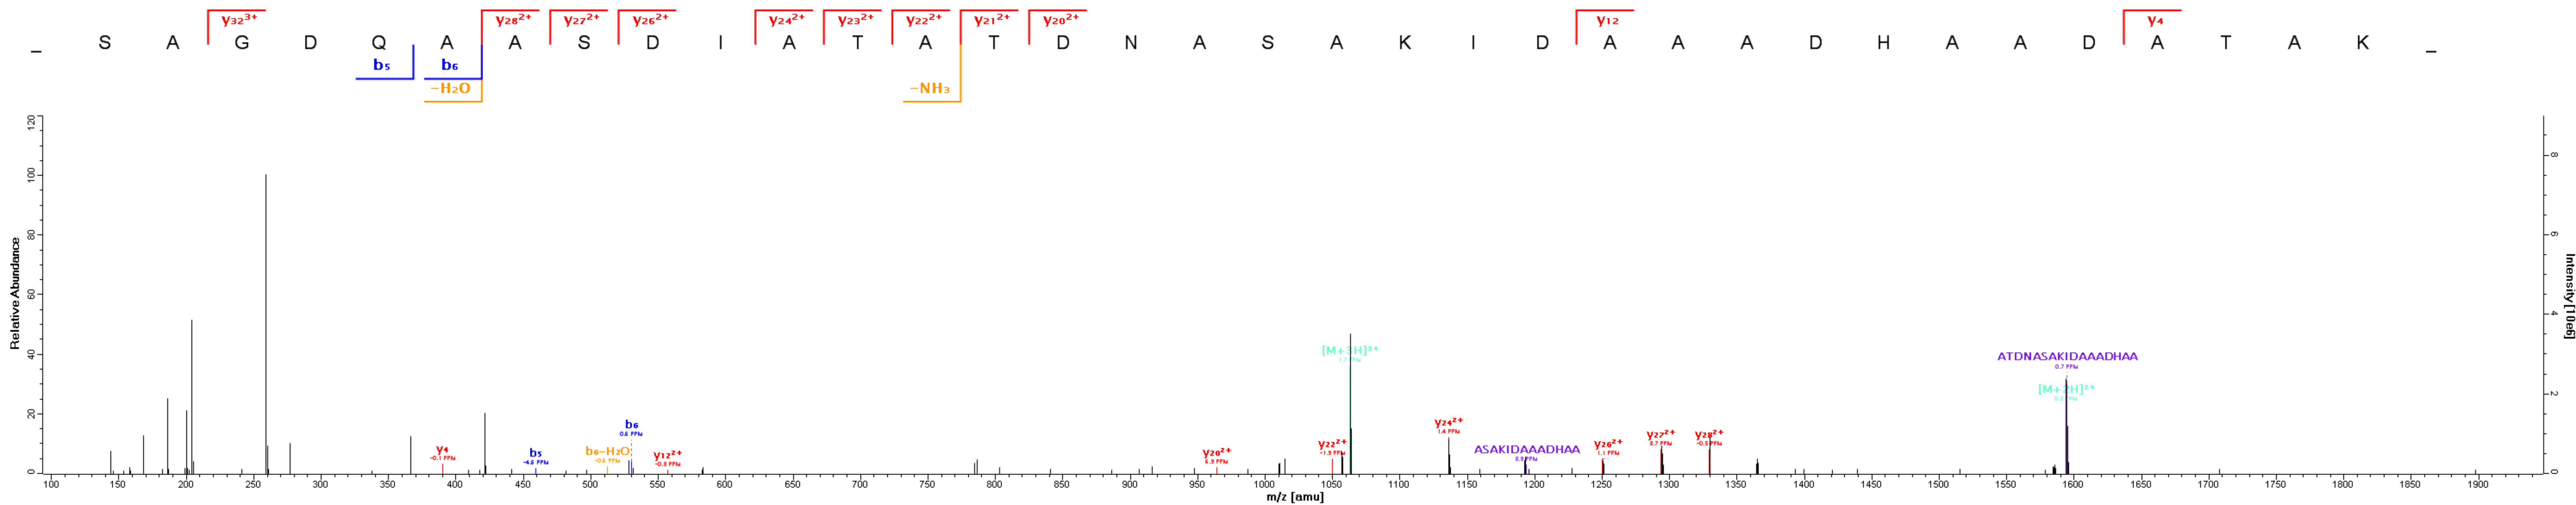

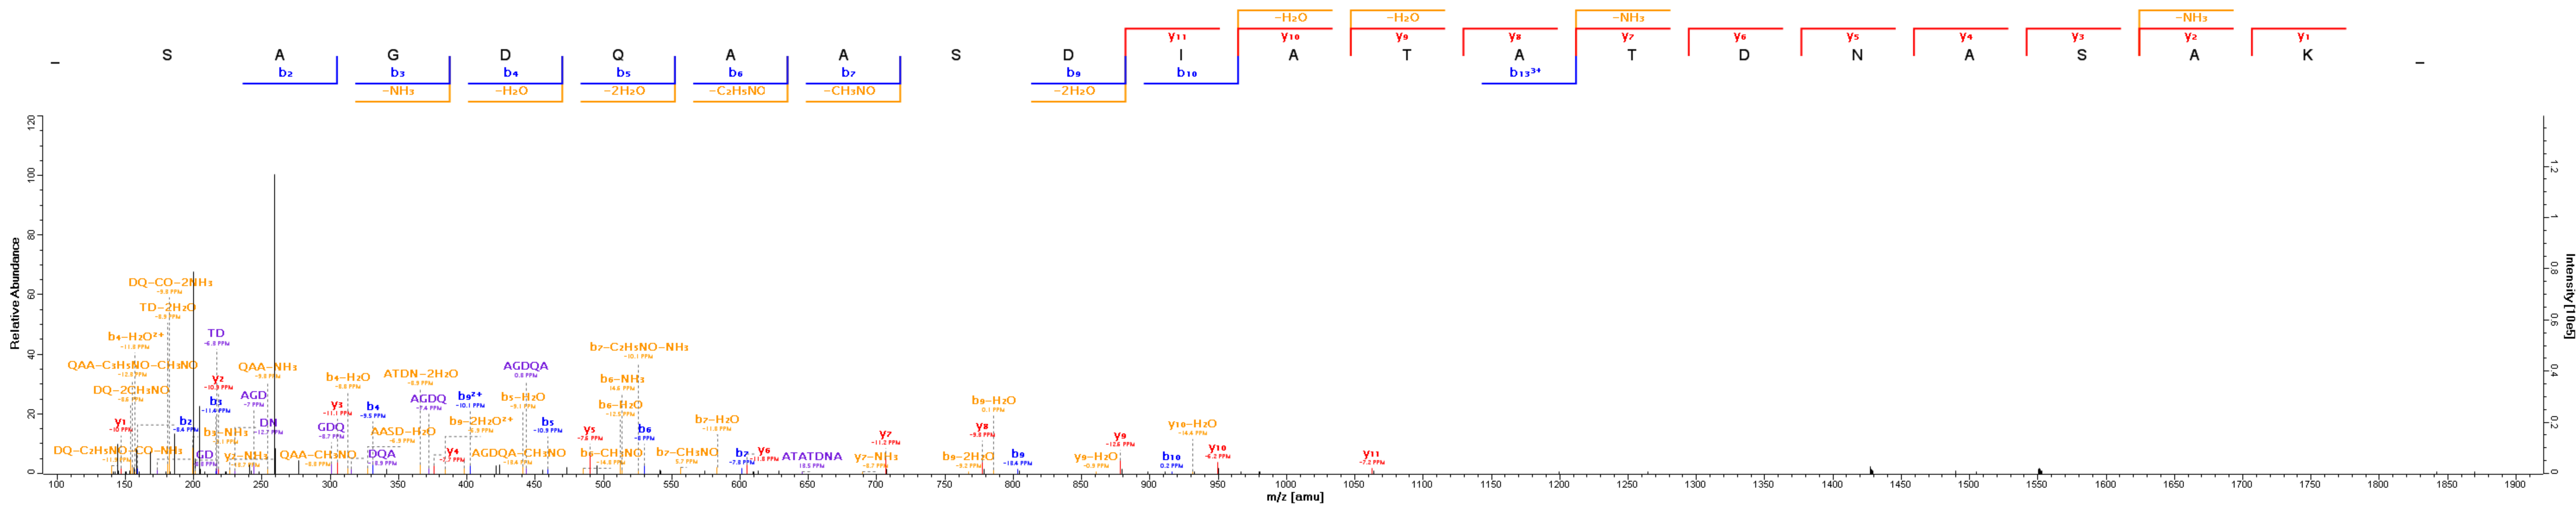

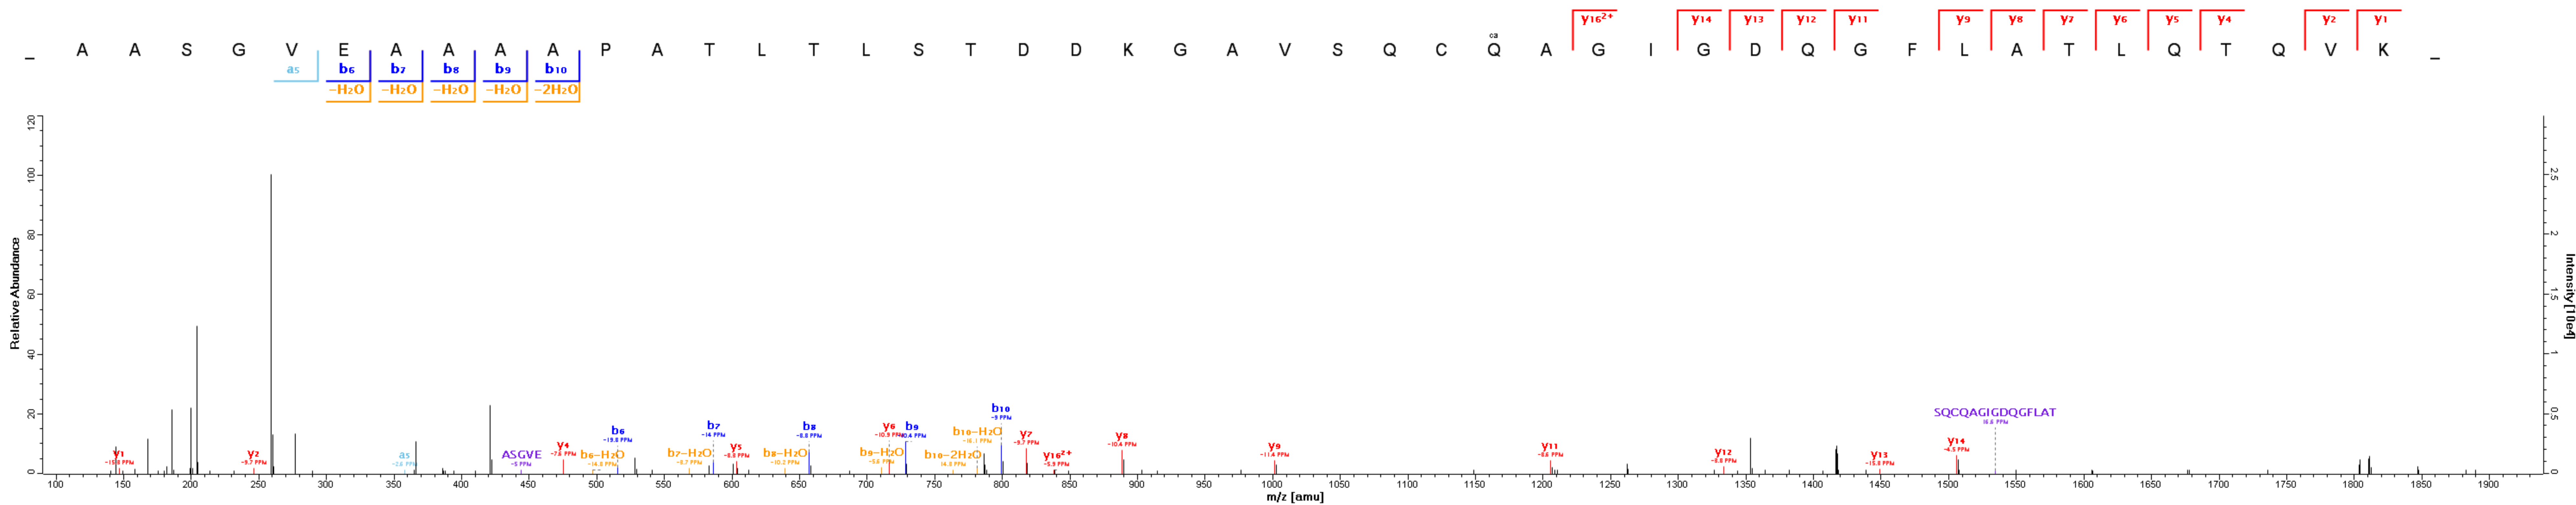

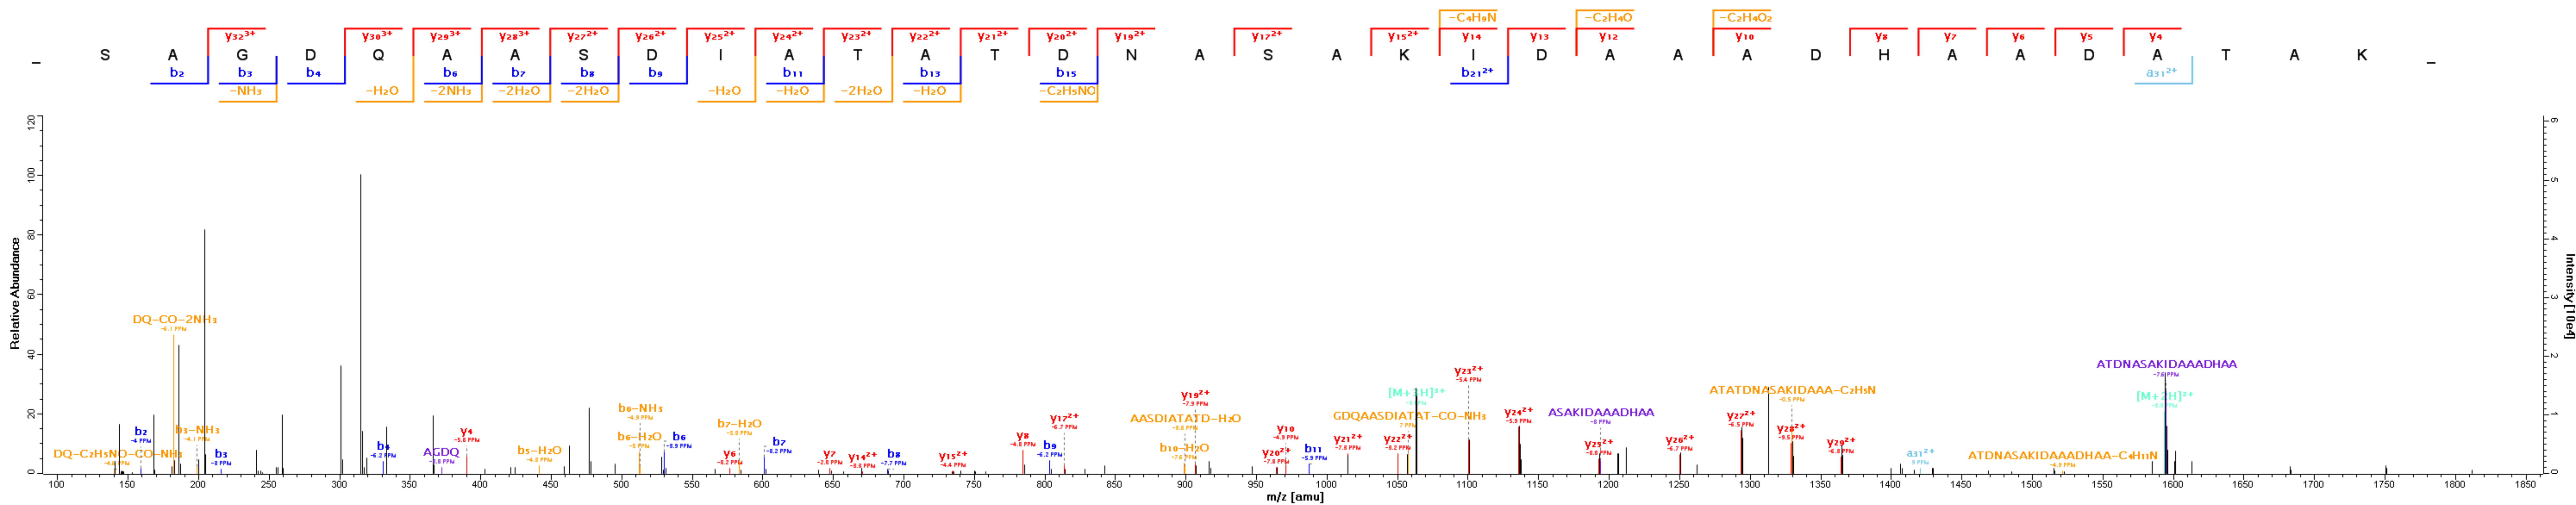



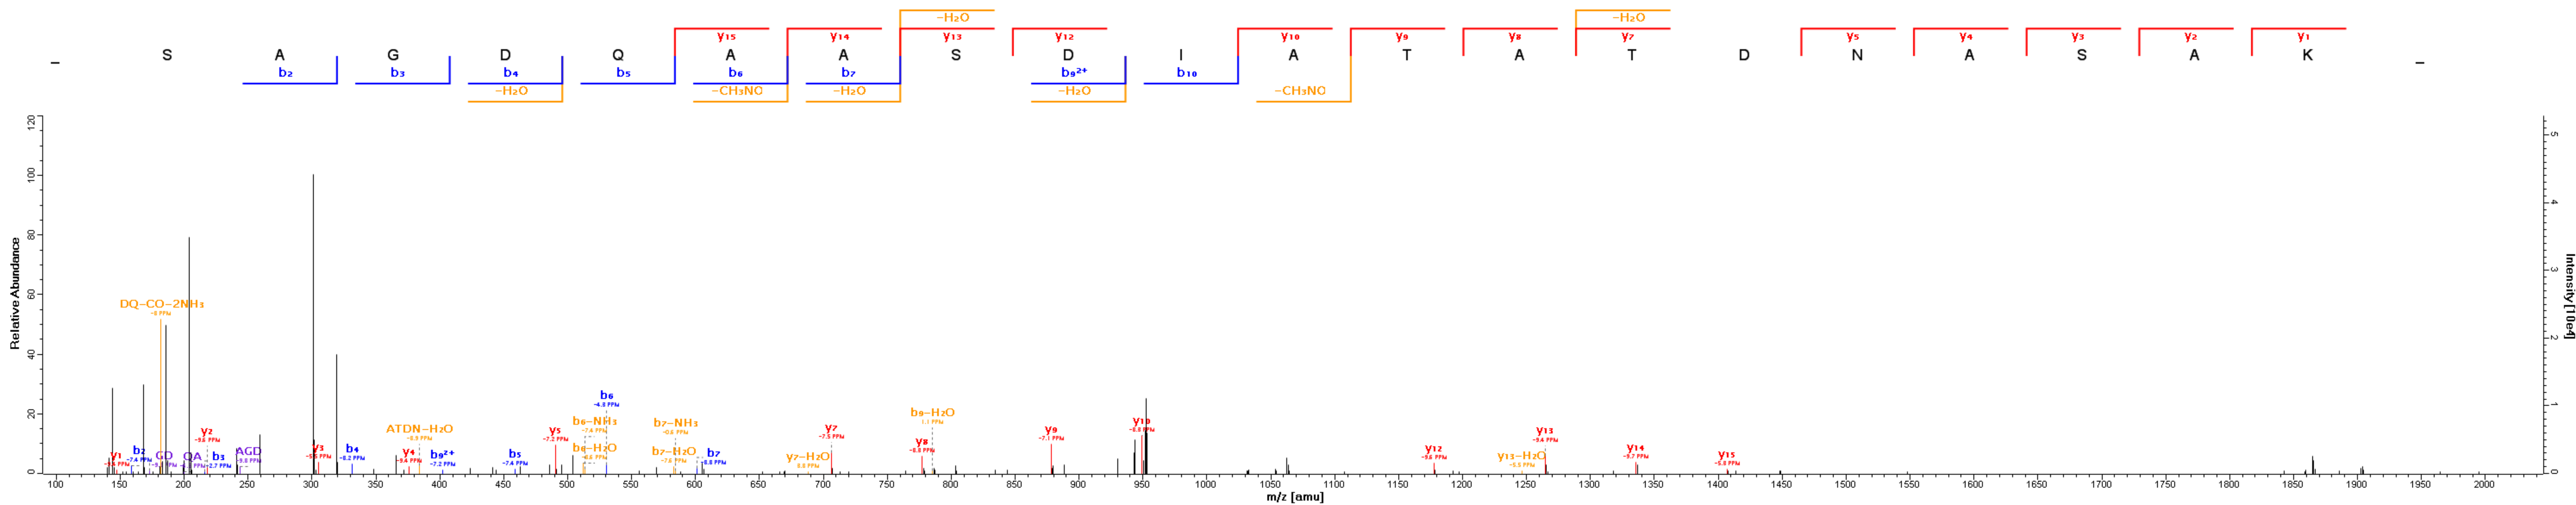

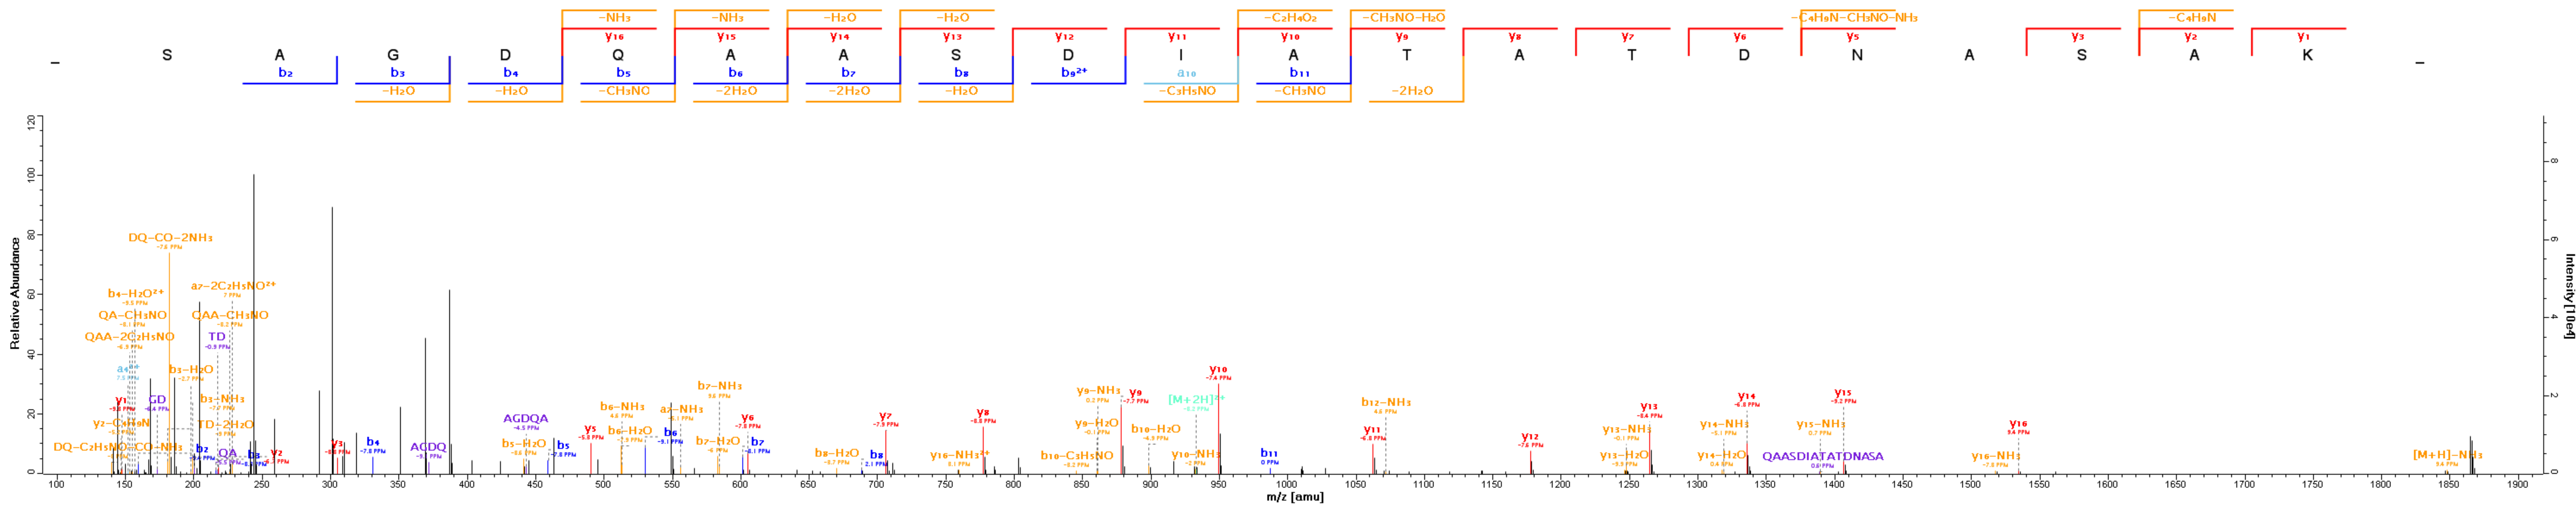

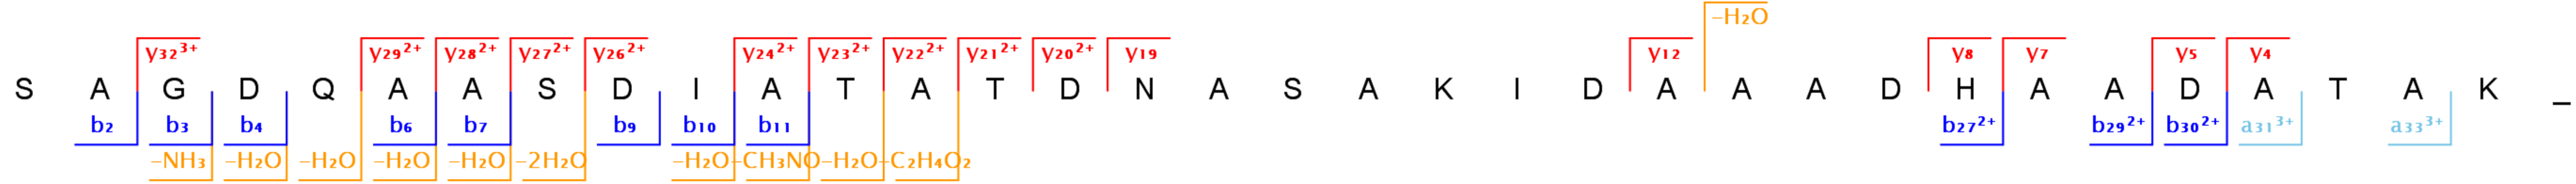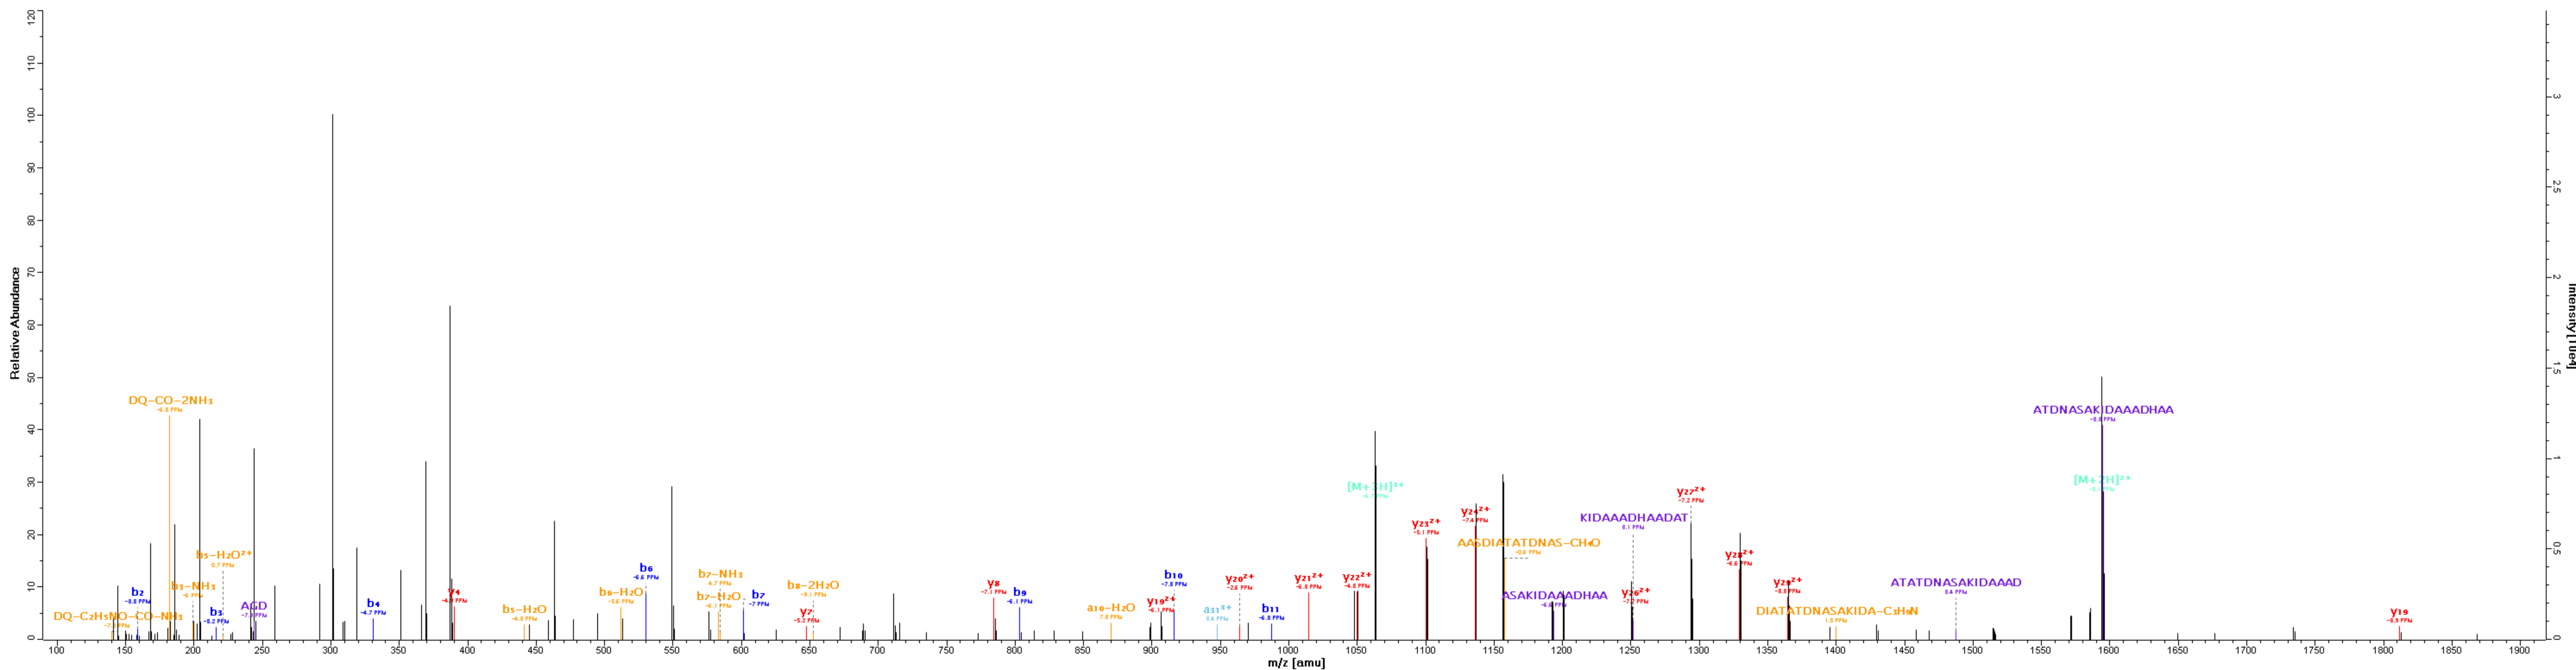

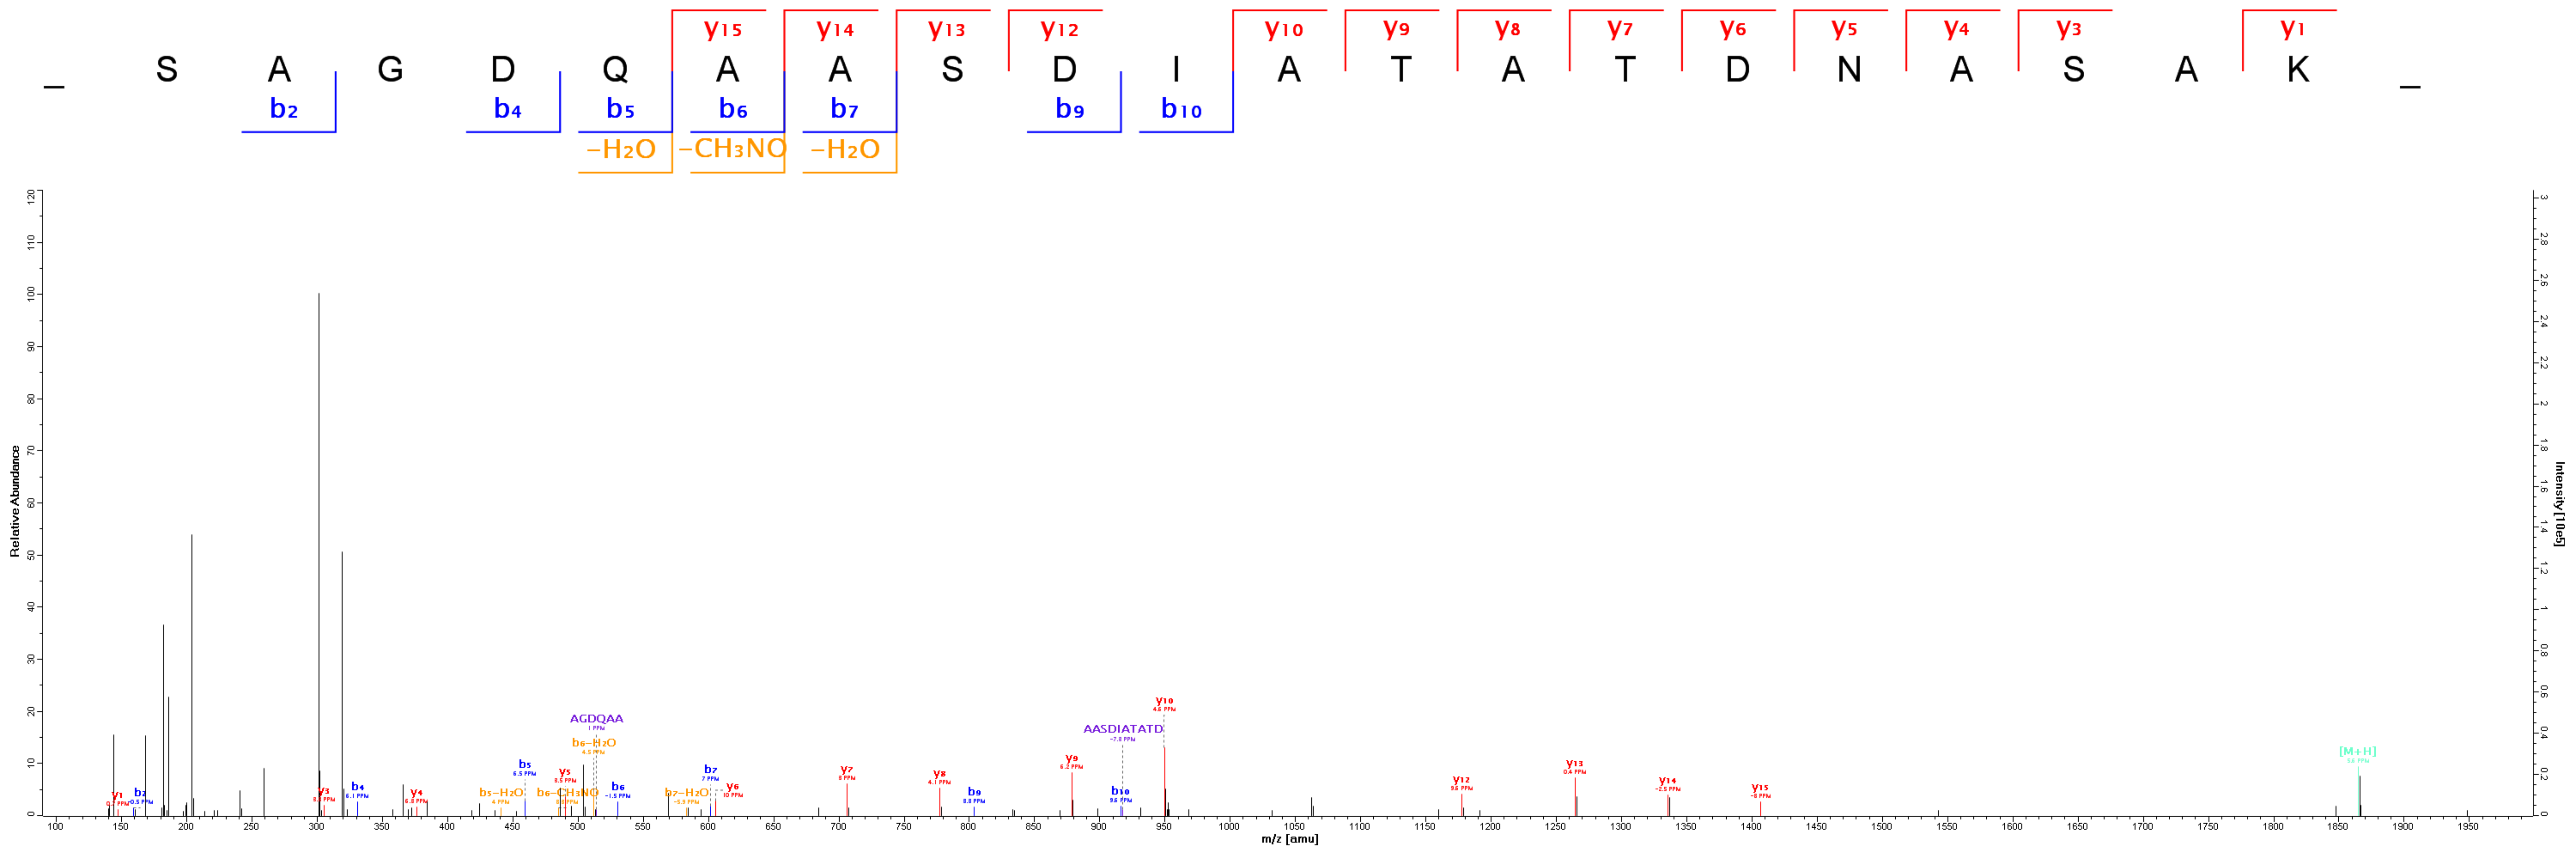

Supplement: supp_M114.038315_mcp.M114.038315-9.pdf [file supp_M114.038315_mcp.M114.038315-9.pdf]
