# Supplementary material
Source: PubMed Central journal article supplement (PMC4159654)
Supplement: supp_M114.038315_mcp.M114.038315-10.pdf [file supp_M114.038315_mcp.M114.038315-10.pdf]

**Supplementary Table 9: Bioinformatic analysis of *Acinetobacter baumannii* identified glycoproteins**

| Uniprot accession number strain<br>SDF | Uniprot accession number strain<br>ATCC 19606 | Uniprot accession number strain<br>ATCC 17967 | Page |
|----------------------------------------|-----------------------------------------------|-----------------------------------------------|------|
| BOVKN6_ACIBS                           | DOCAB8_ACIBA                                  | A3M265_ACIBT                                  | 2    |
| BOVLIO_ACIBS                           | DOCEI7_ACIBA                                  | A7FB63_ACIBT                                  | 3    |
| BOVRK6_ACIBS                           | DOC6C0_ACIBA                                  | -                                             | 4    |
| BOVSH8_ACIBS                           | DOCDQ9_ACIBA                                  | -                                             | 5    |
| BOVV82_ACIBS                           | DOCA69_ACIBA                                  | -                                             | 6    |
| -                                      | DOC6Q2_ACIBA                                  | A7FBI1_ACIBT                                  | 7    |
| -                                      | DOC7T4_ACIBA                                  | -                                             | 8    |
| -                                      | DOC8B9_ACIBA                                  | A7FB95_ACIBT                                  | 9    |
| -                                      | DOC8Y7_ACIBA                                  | -                                             | 10   |
| -                                      | DOCAD2_ACIBA                                  | -                                             | 11   |
| -                                      | DOCC33_ACIBA                                  | A3M796_ACIBT                                  | 12   |
| -                                      | DOCD31_ACIBA                                  | -                                             | 13   |
| -                                      | DOCDA9_ACIBA                                  | -                                             | 14   |

**Supplementary table 9:** Bioinformatic analysis of identified *A. baumannii* glycoproteins. Identified glycoproteins are labeled according to the Uniprot accession number for each strain. The corresponding analysis of each protein is shown on the denoted pages

Protein Name: Putative uncharacterized protein  
 Function: unknown  
 Molecular weight (Da): 34,608  
 Localisation<sup>1</sup>: periplasmic  
 Class<sup>2</sup>: unknown

**Sequence Identity between strains**

| Strains                                                   | Uniprot #    | Acinetobacter baumannii (strain SDF) | Acinetobacter baumannii (strain AYE) | Acinetobacter baumannii ATCC 19606 | Acinetobacter baumannii (strain TCDC-AB0715) | Acinetobacter baumannii (strain 1656-2) | Acinetobacter baumannii (strain ATCC 17978 / NCDC KC 755) | Acinetobacter baumannii (strain AB307-0294) |
|-----------------------------------------------------------|--------------|--------------------------------------|--------------------------------------|------------------------------------|----------------------------------------------|-----------------------------------------|-----------------------------------------------------------|---------------------------------------------|
|                                                           |              | BOVKN6_ACIBS                         | BOV5I4_ACIBY                         | DOCAB8_ACIBA                       | FOQNY6_ACIBD                                 | E8PBZ6_ACIB1                            | A3M265_ACIBT                                              | B7H040_ACIB3                                |
| Acinetobacter baumannii (strain SDF)                      | BOVKN6_ACIBS | 100%                                 | 97%                                  | 97%                                | 97.00%                                       | 97.00%                                  | 97.00%                                                    | 96.00%                                      |
| Acinetobacter baumannii (strain AYE)                      | BOV5I4_ACIBY |                                      | 100%                                 | 98.00%                             | 99.00%                                       | 99.00%                                  | 99.00%                                                    | 99.00%                                      |
| Acinetobacter baumannii ATCC 19606                        | DOCAB8_ACIBA |                                      |                                      | 100%                               | 98.00%                                       | 98.00%                                  | 98.00%                                                    | 97.00%                                      |
| Acinetobacter baumannii (strain TCDC-AB0715)              | FOQNY6_ACIBD |                                      |                                      |                                    | 100%                                         | 100.00%                                 | 98.00%                                                    | 99.00%                                      |
| Acinetobacter baumannii (strain 1656-2)                   | E8PBZ6_ACIB1 |                                      |                                      |                                    |                                              | 100%                                    | 98.00%                                                    | 99.00%                                      |
| Acinetobacter baumannii (strain ATCC 17978 / NCDC KC 755) | A3M265_ACIBT |                                      |                                      |                                    |                                              |                                         | 100%                                                      | 98.00%                                      |
| Acinetobacter baumannii (strain AB307-0294)               | B7H040_ACIB3 |                                      |                                      |                                    |                                              |                                         |                                                           | 100%                                        |

<sup>1</sup> based on SignalP, <http://www.cbs.dtu.dk/services/SignalP/>

<sup>2</sup> based on Psortb, <http://www.psort.org/psortb/>

Protein Name: ToIA  
 Function: membrane protein  
 Molecular weight (Da): 11,226  
 Localisation<sup>1</sup>: periplasmic  
 Class<sup>2</sup>: unknown

**Sequence Identity between strains**

| Strains                                                   |              | Acinetobacter baumannii (strain SDF) | Acinetobacter baumannii (strain AYE) | Acinetobacter baumannii ATCC 19606 | Acinetobacter baumannii (strain TCDC-AB0715) | Acinetobacter baumannii (strain 1656-2) | Acinetobacter baumannii (strain ATCC 17978 / NCDC KC 755) | Acinetobacter baumannii (strain AB307-0294) |
|-----------------------------------------------------------|--------------|--------------------------------------|--------------------------------------|------------------------------------|----------------------------------------------|-----------------------------------------|-----------------------------------------------------------|---------------------------------------------|
|                                                           | Uniprot #    | BOVLIO_ACIBS                         | BOVAK5_ACIBY                         | DOCEI7_ACIBA                       | FOQJK1_ACIBD                                 | E8PA92_ACIB1                            | A7FB63_ACIBT                                              | B7GWW8_ACIB3                                |
| Acinetobacter baumannii (strain SDF)                      | BOVLIO_ACIBS | 100%                                 | 97.00%                               | 97.00%                             | 98.00%                                       | 98.00%                                  | 97.00%                                                    | 97.00%                                      |
| Acinetobacter baumannii (strain AYE)                      | BOVAK5_ACIBY |                                      | 100%                                 | 100.00%                            | 99.00%                                       | 99.00%                                  | 100.00%                                                   | 100.00%                                     |
| Acinetobacter baumannii ATCC 19606                        | DOCEI7_ACIBA |                                      |                                      | 100%                               | 99.00%                                       | 99.00%                                  | 100.00%                                                   | 100.00%                                     |
| Acinetobacter baumannii (strain TCDC-AB0715)              | FOQJK1_ACIBD |                                      |                                      |                                    | 100%                                         | 100.00%                                 | 99.00%                                                    | 99.00%                                      |
| Acinetobacter baumannii (strain 1656-2)                   | E8PA92_ACIB1 |                                      |                                      |                                    |                                              | 100%                                    | 99.00%                                                    | 99.00%                                      |
| Acinetobacter baumannii (strain ATCC 17978 / NCDC KC 755) | A7FB63_ACIBT |                                      |                                      |                                    |                                              |                                         | 100%                                                      | 100.00%                                     |
| Acinetobacter baumannii (strain AB307-0294)               | B7GWW8_ACIB3 |                                      |                                      |                                    |                                              |                                         |                                                           | 100%                                        |

<sup>1</sup> based on SignalP, <http://www.cbs.dtu.dk/services/SignalP/>

<sup>2</sup> based on Psortb, <http://www.psort.org/psortb/>

Protein Name: Putative uncharacterized protein  
 Function: unknown  
 Molecular weight (Da): 42,327  
 Localisation<sup>1</sup>: periplasmic  
 Class<sup>2</sup>: CytoplasmicMembrane

**Sequence Identity between strains**

| Strains                                                   | Uniprot #    | Acinetobacter baumannii (strain SDF) | Acinetobacter baumannii (strain AYE) | Acinetobacter baumannii ATCC 19606 | Acinetobacter baumannii (strain TCDC-AB0715) | Acinetobacter baumannii (strain 1656-2) | Acinetobacter baumannii (strain ATCC 17978 / NCDC KC 755) | Acinetobacter baumannii (strain AB307-0294) |
|-----------------------------------------------------------|--------------|--------------------------------------|--------------------------------------|------------------------------------|----------------------------------------------|-----------------------------------------|-----------------------------------------------------------|---------------------------------------------|
| Acinetobacter baumannii (strain SDF)                      | B0VRK6_ACIBS | 100%                                 | 98.00%                               | 99.00%                             | 99.00%                                       | 99.00%                                  | 97.00%                                                    | 98.00%                                      |
| Acinetobacter baumannii (strain AYE)                      | B0V745_ACIBY |                                      | 100%                                 | 98.00%                             | 99.00%                                       | 98.00%                                  | 97.00%                                                    | 100.00%                                     |
| Acinetobacter baumannii ATCC 19606                        | D0C6C0_ACIBA |                                      |                                      | 100%                               | 99.00%                                       | 99.00%                                  | 98.00%                                                    | 98.00%                                      |
| Acinetobacter baumannii (strain TCDC-AB0715)              | F0QIR8_ACIBD |                                      |                                      |                                    | 100%                                         | 99.00%                                  | 98.00%                                                    | 99.00%                                      |
| Acinetobacter baumannii (strain 1656-2)                   | E8P8Z1_ACIB1 |                                      |                                      |                                    |                                              | 100%                                    | 98.00%                                                    | 98.00%                                      |
| Acinetobacter baumannii (strain ATCC 17978 / NCDC KC 755) | A3M6D2_ACIBT |                                      |                                      |                                    |                                              |                                         | 100%                                                      | 97.00%                                      |
| Acinetobacter baumannii (strain AB307-0294)               | B7H1B6_ACIB3 |                                      |                                      |                                    |                                              |                                         |                                                           | 100%                                        |

<sup>1</sup> based on SignalP, <http://www.cbs.dtu.dk/services/SignalP/>

<sup>2</sup> based on Psortb, <http://www.psort.org/psortb/>

Protein Name: Putative uncharacterized protein  
 Function: unknown  
 Molecular weight (Da): 30,909  
 Localisation<sup>1</sup>: unknown  
 Class<sup>2</sup>: unknown

**Sequence Identity between strains**

| Strains                                                   | Uniprot #    | Acinetobacter baumannii (strain SDF) | Acinetobacter baumannii (strain AYE) | Acinetobacter baumannii ATCC 19606 | Acinetobacter baumannii (strain TCDC-AB0715) | Acinetobacter baumannii (strain 1656-2) | Acinetobacter baumannii (strain ATCC 17978 / NCDC KC 755) | Acinetobacter baumannii (strain AB307-0294) |
|-----------------------------------------------------------|--------------|--------------------------------------|--------------------------------------|------------------------------------|----------------------------------------------|-----------------------------------------|-----------------------------------------------------------|---------------------------------------------|
| Acinetobacter baumannii (strain SDF)                      | B0VSH8_ACIBS | 100%                                 | 98.00%                               | 99.00%                             | 98.00%                                       | 98.00%                                  | 98.00%                                                    | 98.00%                                      |
| Acinetobacter baumannii (strain AYE)                      | B0VEH4_ACIBY |                                      | 100%                                 | 99.00%                             | 100.00%                                      | 100.00%                                 | 99.00%                                                    | 100.00%                                     |
| Acinetobacter baumannii ATCC 19606                        | D0CDQ9_ACIBA |                                      |                                      | 100%                               | 99.00%                                       | 99.00%                                  | 99.00%                                                    | 99.00%                                      |
| Acinetobacter baumannii (strain TCDC-AB0715)              | F0QEY1_ACIBD |                                      |                                      |                                    | 100%                                         | 100.00%                                 | 99.00%                                                    | 100.00%                                     |
| Acinetobacter baumannii (strain 1656-2)                   | E8PB50_ACIB1 |                                      |                                      |                                    |                                              | 100%                                    | 99.00%                                                    | 100.00%                                     |
| Acinetobacter baumannii (strain ATCC 17978 / NCDC KC 755) | A3M897_ACIBT |                                      |                                      |                                    |                                              |                                         | 100%                                                      | 99.00%                                      |
| Acinetobacter baumannii (strain AB307-0294)               | B7GXI1_ACIB3 |                                      |                                      |                                    |                                              |                                         |                                                           | 100%                                        |

<sup>1</sup> based on SignalP, <http://www.cbs.dtu.dk/services/SignalP/>

<sup>2</sup> based on Psortb, <http://www.psort.org/psortb/>

Protein Name: Predicted protein  
 Function: unknown  
 Molecular weight (Da): 7,395  
 Localisation<sup>1</sup>: periplasmic  
 Class<sup>2</sup>: unknown

**Sequence Identity between strains**

| Strains                                                   | Uniprot #    | Acinetobacter baumannii (strain SDF) | Acinetobacter baumannii (strain AYE) | Acinetobacter baumannii ATCC 19606 | Acinetobacter baumannii (strain TCDC-AB0715) | Acinetobacter baumannii (strain 1656-2) | Acinetobacter baumannii (strain ATCC 17978 / NCDC KC 755) | Acinetobacter baumannii (strain AB307-0294) |
|-----------------------------------------------------------|--------------|--------------------------------------|--------------------------------------|------------------------------------|----------------------------------------------|-----------------------------------------|-----------------------------------------------------------|---------------------------------------------|
| Acinetobacter baumannii (strain SDF)                      | B0VV82_ACIBS | 100%                                 | 72.00%                               | 80.00%                             | 80.00%                                       | 80.00%                                  | 80.00%                                                    | 72.00%                                      |
| Acinetobacter baumannii (strain AYE)                      | B0V5Q3_ACIBY |                                      | 100%                                 | 81.00%                             | 81.00%                                       | 81.00%                                  | 79.00%                                                    | 100.00%                                     |
| Acinetobacter baumannii ATCC 19606                        | D0CA69_ACIBA |                                      |                                      | 100%                               | 100.00%                                      | 100.00%                                 | 89.00%                                                    | 81.00%                                      |
| Acinetobacter baumannii (strain TCDC-AB0715)              | F0QPJ4_ACIBD |                                      |                                      |                                    | 100%                                         | 100.00%                                 | 89.00%                                                    | 81.00%                                      |
| Acinetobacter baumannii (strain 1656-2)                   | E8PC45_ACIB1 |                                      |                                      |                                    |                                              | 100%                                    | 89.00%                                                    | 81.00%                                      |
| Acinetobacter baumannii (strain ATCC 17978 / NCDC KC 755) | A7FAU3_ACIBT |                                      |                                      |                                    |                                              |                                         | 100%                                                      | 79.00%                                      |
| Acinetobacter baumannii (strain AB307-0294)               | B7GZZ3_ACIB3 |                                      |                                      |                                    |                                              |                                         |                                                           | 100%                                        |

<sup>1</sup> based on SignalP, <http://www.cbs.dtu.dk/services/SignalP/>

<sup>2</sup> based on Psortb, <http://www.psort.org/psortb/>

Protein Name: Putative uncharacterized protein  
 Function: unknown  
 Molecular weight (Da): 18,176  
 Localisation<sup>1</sup>: periplasmic  
 Class<sup>2</sup>: unknown

**Sequence Identity between strains**

| Strains                                                   | Uniprot #    | Acinetobacter baumannii (strain SDF) | Acinetobacter baumannii (strain AYE) | Acinetobacter baumannii ATCC 19606 | Acinetobacter baumannii (strain TCDC-AB0715) | Acinetobacter baumannii (strain 1656-2) | Acinetobacter baumannii (strain ATCC 17978 / NCDC KC 755) | Acinetobacter baumannii (strain AB307-0294) |
|-----------------------------------------------------------|--------------|--------------------------------------|--------------------------------------|------------------------------------|----------------------------------------------|-----------------------------------------|-----------------------------------------------------------|---------------------------------------------|
| Acinetobacter baumannii (strain SDF)                      | B0VQI7_ACIBS | 100%                                 | 99.00%                               | 99.00%                             | 99.00%                                       | 99.00%                                  | 99.00%                                                    | 99.00%                                      |
| Acinetobacter baumannii (strain AYE)                      | B0V5G3_ACIBY |                                      | 100%                                 | 100.00%                            | 100.00%                                      | 100.00%                                 | 100.00%                                                   | 100.00%                                     |
| Acinetobacter baumannii ATCC 19606                        | D0C6Q2_ACIBA |                                      |                                      | 100%                               | 100.00%                                      | 100.00%                                 | 100.00%                                                   | 100.00%                                     |
| Acinetobacter baumannii (strain TCDC-AB0715)              | F0QGP1_ACIBD |                                      |                                      |                                    | 100%                                         | 100.00%                                 | 100.00%                                                   | 100.00%                                     |
| Acinetobacter baumannii (strain 1656-2)                   | E8PH34_ACIB1 |                                      |                                      |                                    |                                              | 100%                                    | 100.00%                                                   | 100.00%                                     |
| Acinetobacter baumannii (strain ATCC 17978 / NCDC KC 755) | A7FBI1_ACIBT |                                      |                                      |                                    |                                              |                                         | 100%                                                      | 100.00%                                     |
| Acinetobacter baumannii (strain AB307-0294)               | B7H224_ACIB3 |                                      |                                      |                                    |                                              |                                         |                                                           | 100%                                        |

<sup>1</sup> based on SignalP, <http://www.cbs.dtu.dk/services/SignalP/>

<sup>2</sup> based on Psortb, <http://www.psort.org/psortb/>

Protein Name: Putative uncharacterized protein  
 Function: unknown  
 Molecular weight (Da): 18,176  
 Localisation<sup>1</sup>: periplasmic  
 Class<sup>2</sup>: unknown

**Sequence Identity between strains**

| Strains                                                   | Uniprot #    | Acinetobacter baumannii (strain SDF) | Acinetobacter baumannii (strain AYE) | Acinetobacter baumannii ATCC 19606 | Acinetobacter baumannii (strain TCDC-AB0715) | Acinetobacter baumannii (strain 1656-2) | baumannii (strain ATCC 17978 / NCDC KC 755) | Acinetobacter baumannii (strain AB307-0294) |
|-----------------------------------------------------------|--------------|--------------------------------------|--------------------------------------|------------------------------------|----------------------------------------------|-----------------------------------------|---------------------------------------------|---------------------------------------------|
| Acinetobacter baumannii (strain SDF)                      | B0VMX4_ACIBS | 100%                                 | 97.00%                               | 95.00%                             | 96.00%                                       | 96.00%                                  | 96.00%                                      | 97.00%                                      |
| Acinetobacter baumannii (strain AYE)                      | B0VD02_ACIBY |                                      | 100%                                 | 97.00%                             | 98.00%                                       | 98.00%                                  | 98.00%                                      | 100.00%                                     |
| Acinetobacter baumannii ATCC 19606                        | D0C7T4_ACIBA |                                      |                                      | 100%                               | 98.00%                                       | 98.00%                                  | 98.00%                                      | 97.00%                                      |
| Acinetobacter baumannii (strain TCDC-AB0715)              | F0QP13_ACIBD |                                      |                                      |                                    | 100%                                         | 100.00%                                 | 100.00%                                     | 98.00%                                      |
| Acinetobacter baumannii (strain 1656-2)                   | E8PDM4_ACIB1 |                                      |                                      |                                    |                                              | 100%                                    | 100.00%                                     | 98.00%                                      |
| Acinetobacter baumannii (strain ATCC 17978 / NCDC KC 755) | A7FBB9_ACIBT |                                      |                                      |                                    |                                              |                                         | 100%                                        | 98.00%                                      |
| Acinetobacter baumannii (strain AB307-0294)               | B7H3N7_ACIB3 |                                      |                                      |                                    |                                              |                                         |                                             | 100%                                        |

<sup>1</sup> based on SignalP, <http://www.cbs.dtu.dk/services/SignalP/>

<sup>2</sup> based on Psortb, <http://www.psort.org/psortb/>



Protein Name: Putative uncharacterized protein  
 Function: unknwn  
 Molecular weight (Da): 5,102  
 Localisation<sup>1</sup>: periplasmic  
 Class<sup>2</sup>: Non-Cytoplasmic

**Sequence Identity between strains**

| Strains                                                   | Uniprot #    | Acinetobacter baumannii (strain SDF) | Acinetobacter baumannii (strain AYE) | Acinetobacter baumannii ATCC 19606 | Acinetobacter baumannii (strain TCDC-AB0715) | Acinetobacter baumannii (strain 1656-2) | Acinetobacter baumannii (strain ATCC 17978 / NCDC KC 755) | Acinetobacter baumannii (strain AB307-0294) |
|-----------------------------------------------------------|--------------|--------------------------------------|--------------------------------------|------------------------------------|----------------------------------------------|-----------------------------------------|-----------------------------------------------------------|---------------------------------------------|
|                                                           | Uniprot #    | NA                                   | B0VBI1_ACIBY                         | DOC8B9_ACIBA                       | NA                                           | E8PC89_ACIB1                            | A7FB95_ACIBT                                              | B7H463_ACIB3                                |
| Acinetobacter baumannii (strain SDF)                      | NA           | -                                    | -                                    | -                                  | -                                            | -                                       | -                                                         | -                                           |
| Acinetobacter baumannii (strain AYE)                      | B0VBI1_ACIBY |                                      | 100%                                 | 97.00%                             | -                                            | 97.00%                                  | 97.00%                                                    | 100.00%                                     |
| Acinetobacter baumannii ATCC 19606                        | DOC8B9_ACIBA |                                      |                                      | 100%                               | -                                            | 100.00%                                 | 100.00%                                                   | 97.00%                                      |
| Acinetobacter baumannii (strain TCDC-AB0715)              | NA           |                                      |                                      |                                    | -                                            | -                                       | -                                                         | -                                           |
| Acinetobacter baumannii (strain 1656-2)                   | E8PC89_ACIB1 |                                      |                                      |                                    |                                              | 100%                                    | 100.00%                                                   | 97.00%                                      |
| Acinetobacter baumannii (strain ATCC 17978 / NCDC KC 755) | A7FB95_ACIBT |                                      |                                      |                                    |                                              |                                         | 100%                                                      | 97.00%                                      |
| Acinetobacter baumannii (strain AB307-0294)               | B7H463_ACIB3 |                                      |                                      |                                    |                                              |                                         |                                                           | 100%                                        |

<sup>1</sup> based on SignalP, <http://www.cbs.dtu.dk/services/SignalP/>

<sup>2</sup> based on Psortb, <http://www.psort.org/psortb/>

Protein Name: Lipoprotein  
 Function: unkown  
 Molecular weight (Da): 17,543  
 Localisation<sup>1</sup>: periplasmic  
 Class<sup>2</sup>: OuterMembrane

**Sequence Identity between strains**

| Strains                                                   | Uniprot #    | Acinetobacter baumannii (strain SDF) | Acinetobacter baumannii (strain AYE) | Acinetobacter baumannii ATCC 19606 | Acinetobacter baumannii (strain TCDC-AB0715) | Acinetobacter baumannii (strain 1656-2) | Acinetobacter baumannii (strain ATCC 17978 / NCDC KC 755) | Acinetobacter baumannii (strain AB307-0294) |
|-----------------------------------------------------------|--------------|--------------------------------------|--------------------------------------|------------------------------------|----------------------------------------------|-----------------------------------------|-----------------------------------------------------------|---------------------------------------------|
| Acinetobacter baumannii (strain SDF)                      | B0VSC6_ACIBS | 100%                                 | 100.00%                              | 100.00%                            | 100.00%                                      | 100.00%                                 | 100.00%                                                   | 100.00%                                     |
| Acinetobacter baumannii (strain AYE)                      | B0V9M7_ACIBY |                                      | 100%                                 | 100.00%                            | 100.00%                                      | 100.00%                                 | 100.00%                                                   | 100.00%                                     |
| Acinetobacter baumannii ATCC 19606                        | DOC8Y7_ACIBA |                                      |                                      | 100%                               | 100.00%                                      | 100.00%                                 | 100.00%                                                   | 100.00%                                     |
| Acinetobacter baumannii (strain TCDC-AB0715)              | F0QH45_ACIBD |                                      |                                      |                                    | 100.00%                                      | 100.00%                                 | 100.00%                                                   | 100.00%                                     |
| Acinetobacter baumannii (strain 1656-2)                   | E8PFC2_ACIB1 |                                      |                                      |                                    |                                              | 100%                                    | 100.00%                                                   | 100.00%                                     |
| Acinetobacter baumannii (strain ATCC 17978 / NCDC KC 755) | A3M3E7_ACIBT |                                      |                                      |                                    |                                              |                                         | 100%                                                      | 100.00%                                     |
| Acinetobacter baumannii (strain AB307-0294)               | B7GXU9_ACIB3 |                                      |                                      |                                    |                                              |                                         |                                                           | 100.00%                                     |

<sup>1</sup> based on SignalP, <http://www.cbs.dtu.dk/services/SignalP/>

<sup>2</sup> based on Psortb, <http://www.psort.org/psortb/>

Protein Name: Membrane-fusion protein  
 Function: transmembrane transport  
 Molecular weight (Da): 48,204  
 Localisation<sup>1</sup>: unknown  
 Class<sup>2</sup>: CytoplasmicMembrane

**Sequence Identity between strains**

| Strains                                                   | Uniprot #    | Acinetobacter baumannii (strain SDF) | Acinetobacter baumannii (strain AYE) | Acinetobacter baumannii ATCC 19606 | Acinetobacter baumannii (strain TCDC-AB0715) | Acinetobacter baumannii (strain 1656-2) | Acinetobacter baumannii (strain ATCC 17978 / NCDC KC 755) | Acinetobacter baumannii (strain AB307-0294) |
|-----------------------------------------------------------|--------------|--------------------------------------|--------------------------------------|------------------------------------|----------------------------------------------|-----------------------------------------|-----------------------------------------------------------|---------------------------------------------|
| Acinetobacter baumannii (strain SDF)                      | B0VKQ2_ACIBS | 100%                                 | 99.00%                               | 99.00%                             | 98.00%                                       | 98.00%                                  | 100.00%                                                   | 99.00%                                      |
| Acinetobacter baumannii (strain AYE)                      | B0V5H5_ACIBY |                                      | 100%                                 | 99.00%                             | 99.00%                                       | 99.00%                                  | 100.00%                                                   | 100.00%                                     |
| Acinetobacter baumannii ATCC 19606                        | D0CAD2_ACIBA |                                      |                                      | 100%                               | 99.00%                                       | 99.00%                                  | 99.00%                                                    | 99.00%                                      |
| Acinetobacter baumannii (strain TCDC-AB0715)              | F0QNX2_ACIBD |                                      |                                      |                                    | 100.00%                                      | 100.00%                                 | 100.00%                                                   | 99.00%                                      |
| Acinetobacter baumannii (strain 1656-2)                   | E8PBH5_ACIB1 |                                      |                                      |                                    |                                              | 100%                                    | 100.00%                                                   | 99.00%                                      |
| Acinetobacter baumannii (strain ATCC 17978 / NCDC KC 755) | A3M247_ACIBT |                                      |                                      |                                    |                                              |                                         | 100%                                                      | 100.00%                                     |
| Acinetobacter baumannii (strain AB307-0294)               | B7H054_ACIB3 |                                      |                                      |                                    |                                              |                                         |                                                           | 100.00%                                     |

<sup>1</sup> based on SignalP, <http://www.cbs.dtu.dk/services/SignalP/>

<sup>2</sup> based on Psortb, <http://www.psort.org/psortb/>

Protein Name: ErfK/YbiS/YcfS/YnhG family  
 Function: transferase activity  
 Molecular weight (Da): 44,929  
 Localisation<sup>1</sup>: periplasmic  
 Class<sup>2</sup>: Non-Cytoplasmic

**Sequence Identity between strains**

| Strains                                                   |              | Acinetobacter baumannii (strain SDF) | Acinetobacter baumannii (strain AYE) | Acinetobacter baumannii ATCC 19606 | Acinetobacter baumannii (strain TCDC-AB0715) | Acinetobacter baumannii (strain 1656-2) | Acinetobacter baumannii (strain ATCC 17978 / NCDC KC 755) | Acinetobacter baumannii (strain AB307-0294) |
|-----------------------------------------------------------|--------------|--------------------------------------|--------------------------------------|------------------------------------|----------------------------------------------|-----------------------------------------|-----------------------------------------------------------|---------------------------------------------|
|                                                           | Uniprot #    | B0VUQ8_ACIBS                         | B0VBT1_ACIBY                         | DOCC33_ACIBA                       | F0QMC7_ACIBD                                 | E8PJ01_ACIB1                            | A3M796_ACIBT                                              | B7GZK5_ACIB3                                |
| Acinetobacter baumannii (strain SDF)                      | B0VUQ8_ACIBS | 100%                                 | 99.00%                               | 98.00%                             | 98.00%                                       | 99.00%                                  | 99.00%                                                    | 99.00%                                      |
| Acinetobacter baumannii (strain AYE)                      | B0VBT1_ACIBY |                                      | 100%                                 | 99.00%                             | 99.00%                                       | 100.00%                                 | 100.00%                                                   | 100.00%                                     |
| Acinetobacter baumannii ATCC 19606                        | DOCC33_ACIBA |                                      |                                      | 100%                               | 99.00%                                       | 99.00%                                  | 99.00%                                                    | 99.00%                                      |
| Acinetobacter baumannii (strain TCDC-AB0715)              | F0QMC7_ACIBD |                                      |                                      |                                    | 100.00%                                      | 99.00%                                  | 99.00%                                                    | 99.00%                                      |
| Acinetobacter baumannii (strain 1656-2)                   | E8PJ01_ACIB1 |                                      |                                      |                                    |                                              | 100%                                    | 100.00%                                                   | 100.00%                                     |
| Acinetobacter baumannii (strain ATCC 17978 / NCDC KC 755) | A3M796_ACIBT |                                      |                                      |                                    |                                              |                                         | 100%                                                      | 100.00%                                     |
| Acinetobacter baumannii (strain AB307-0294)               | B7GZK5_ACIB3 |                                      |                                      |                                    |                                              |                                         |                                                           | 100.00%                                     |

<sup>1</sup> based on SignalP, <http://www.cbs.dtu.dk/services/SignalP/>

<sup>2</sup> based on Psortb, <http://www.psort.org/psortb/>

Protein Name: Putative uncharacterized protein  
 Function: unknown  
 Molecular weight (Da): 15,992  
 Localisation<sup>1</sup>: unknown  
 Class<sup>2</sup>: unknown

**Sequence Identity between strains**

| Strains                                                   |              | Acinetobacter baumannii (strain SDF) | Acinetobacter baumannii (strain AYE) | Acinetobacter baumannii ATCC 19606 | Acinetobacter baumannii (strain TCDC-AB0715) | Acinetobacter baumannii (strain 1656-2) | Acinetobacter baumannii (strain ATCC 17978 / NCDC KC 755) | Acinetobacter baumannii (strain AB307-0294) |
|-----------------------------------------------------------|--------------|--------------------------------------|--------------------------------------|------------------------------------|----------------------------------------------|-----------------------------------------|-----------------------------------------------------------|---------------------------------------------|
|                                                           | Uniprot #    | NA                                   | B0V6T7_ACIBY                         | D0CD31_ACIBA                       | F0QHH4_ACIBD                                 | E8PD83_ACIB1                            | A7FBW3_ACIBT                                              | B7GW36_ACIB3                                |
| Acinetobacter baumannii (strain SDF)                      | NA           | -                                    | -                                    | -                                  | -                                            | -                                       | -                                                         | -                                           |
| Acinetobacter baumannii (strain AYE)                      | B0V6T7_ACIBY |                                      | 100%                                 | 97.00%                             | 99.00%                                       | 99.00%                                  | 98.00%                                                    | 100.00%                                     |
| Acinetobacter baumannii ATCC 19606                        | D0CD31_ACIBA |                                      |                                      | 100%                               | 97.00%                                       | 97.00%                                  | 97.00%                                                    | 97.00%                                      |
| Acinetobacter baumannii (strain TCDC-AB0715)              | F0QHH4_ACIBD |                                      |                                      |                                    | 100.00%                                      | 100.00%                                 | 99.00%                                                    | 99.00%                                      |
| Acinetobacter baumannii (strain 1656-2)                   | E8PD83_ACIB1 |                                      |                                      |                                    |                                              | 100%                                    | 99.00%                                                    | 99.00%                                      |
| Acinetobacter baumannii (strain ATCC 17978 / NCDC KC 755) | A7FBW3_ACIBT |                                      |                                      |                                    |                                              |                                         | 100%                                                      | 98.00%                                      |
| Acinetobacter baumannii (strain AB307-0294)               | B7GW36_ACIB3 |                                      |                                      |                                    |                                              |                                         |                                                           | 100.00%                                     |

<sup>1</sup> based on SignalP, <http://www.cbs.dtu.dk/services/SignalP/>

<sup>2</sup> based on Psortb, <http://www.psort.org/psortb/>

Protein Name: Putative uncharacterized protein  
 Function: unknown  
 Molecular weight (Da): 13,936  
 Localisation<sup>1</sup>: Periplasmic  
 Class<sup>2</sup>: Periplasmic

**Sequence Identity between strains**

| Strains                                                   |              | Acinetobacter baumannii (strain SDF) | Acinetobacter baumannii (strain AYE) | Acinetobacter baumannii ATCC 19606 | Acinetobacter baumannii (strain TCDC-AB0715) | Acinetobacter baumannii (strain 1656-2) | Acinetobacter baumannii (strain ATCC 17978 / NCDC KC 755) | Acinetobacter baumannii (strain AB307-0294) |
|-----------------------------------------------------------|--------------|--------------------------------------|--------------------------------------|------------------------------------|----------------------------------------------|-----------------------------------------|-----------------------------------------------------------|---------------------------------------------|
|                                                           | Uniprot #    | B0VRD8_ACIBS                         | B0V536_ACIBY                         | D0CDA9_ACIBA                       | F0QG99_ACIBD                                 | E8PCH0_ACIB1                            | A3M8P7_ACIBT                                              | B7GWPO_ACIB3                                |
| Acinetobacter baumannii (strain SDF)                      | B0VRD8_ACIBS | 100%                                 | 97.00%                               | 99.00%                             | 99.00%                                       | 99.00%                                  | 98.00%                                                    | 97.00%                                      |
| Acinetobacter baumannii (strain AYE)                      | B0V536_ACIBY |                                      | 100%                                 | 98.00%                             | 98.00%                                       | 98.00%                                  | 99.00%                                                    | 100.00%                                     |
| Acinetobacter baumannii ATCC 19606                        | D0CDA9_ACIBA |                                      |                                      | 100%                               | 100.00%                                      | 100.00%                                 | 99.00%                                                    | 98.00%                                      |
| Acinetobacter baumannii (strain TCDC-AB0715)              | F0QG99_ACIBD |                                      |                                      |                                    | 100.00%                                      | 100.00%                                 | 99.00%                                                    | 98.00%                                      |
| Acinetobacter baumannii (strain 1656-2)                   | E8PCH0_ACIB1 |                                      |                                      |                                    |                                              | 100%                                    | 99.00%                                                    | 98.00%                                      |
| Acinetobacter baumannii (strain ATCC 17978 / NCDC KC 755) | A3M8P7_ACIBT |                                      |                                      |                                    |                                              |                                         | 100%                                                      | 99.00%                                      |
| Acinetobacter baumannii (strain AB307-0294)               | B7GWPO_ACIB3 |                                      |                                      |                                    |                                              |                                         |                                                           | 100.00%                                     |

<sup>1</sup> based on SignalP, <http://www.cbs.dtu.dk/services/SignalP/>

<sup>2</sup> based on Psortb, <http://www.psort.org/psortb/>
