# Supplementary material
Source: PubMed Central journal article supplement (PMC4159654)
Supplement: supp_M114.038315_mcp.M114.038315-11.pdf [file supp_M114.038315_mcp.M114.038315-11.pdf]

**Supplementary table 10A: Glycopeptides identified using ETD in *Acinetobacter baumannii* (strain ATCC19606)**

| Uniprot accession number | Protein name                                                                                          | parent mass | charge | Precursor MH+ | glycan mass | glycan composition                  | peptide mass | peptide                                                      | Site localisation | Page |
|--------------------------|-------------------------------------------------------------------------------------------------------|-------------|--------|---------------|-------------|-------------------------------------|--------------|--------------------------------------------------------------|-------------------|------|
| DOC6Q2_ACIBA             | Putative uncharacterized protein [HMPREF0010_00432] [Acinetobacter baumannii ATCC 19606 = CIP 70.34]" | 850.14      | 4      | 3397.52       | 1030.36     | HexNAc-Hex <sub>2</sub> -HexNAc-300 | 2367.160     | <sup>34</sup> EEEQDKVETAVSEPQPQKPAK <sup>53</sup>            | S <sup>45+</sup>  | 3    |
| DOC6Q2_ACIBA             | Putative uncharacterized protein [HMPREF0010_00432] [Acinetobacter baumannii ATCC 19606 = CIP 70.34]" | 866.41      | 3      | 2597.19       | 988.34      | HexNAc-Hex <sub>2</sub> -HexNAc-258 | 1608.859     | <sup>40</sup> VETAVSEPQPQKPAK <sup>51</sup>                  | S <sup>45+</sup>  | 4    |
| DOC7T4_ACIBA             | Putative uncharacterized protein [HMPREF0010_00814] [Acinetobacter baumannii ATCC 19606 = CIP 70.34]  | 964.42      | 3      | 2891.25       | 1030.36     | HexNAc-Hex <sub>2</sub> -HexNAc-300 | 1860.893     | <sup>28</sup> KEEAAQAGQDAASTAVADK <sup>46</sup>              | S <sup>40+</sup>  | 5    |
| DOC8B9_ACIBA             | Uncharacterized protein [F911_02370] [Acinetobacter baumannii ATCC 19606 = CIP 70.34]                 | 1007.05     | 3      | 3019.13       | 1030.36     | HexNAc-Hex <sub>2</sub> -HexNAc-300 | 1988.766     | <sup>28</sup> NDGM(+16)HEASDPATSHDM(+16)NK <sup>45</sup>     | S <sup>35+</sup>  | 6    |
| DOC8B9_ACIBA             | Uncharacterized protein [F911_02370] [Acinetobacter baumannii ATCC 19606 = CIP 70.34]                 | 755.78      | 4      | 3020.11       | 1030.36     | HexNAc-Hex <sub>2</sub> -HexNAc-300 | 1989.753     | <sup>28</sup> N(+1)DGM(+16)HEASDPATSHDM(+16)NK <sup>45</sup> | S <sup>35+</sup>  | 7    |
| DOC8B9_ACIBA             | Uncharacterized protein [F911_02370] [Acinetobacter baumannii ATCC 19606 = CIP 70.34]                 | 755.04      | 4      | 3017.15       | 1044.38     | HexNAc-Hex <sub>2</sub> -HexNAc-314 | 1972.765     | <sup>28</sup> NDGM(+16)HEASDPATSHDMNK <sup>45</sup>          | S <sup>35+</sup>  | 8    |
| DOCAB8_ACIBA             | Uncharacterized protein [F911_03368] [Acinetobacter baumannii ATCC 19606 = CIP 70.34]                 | 657.32      | 3      | 1969.94       | 1030.36     | HexNAc-Hex <sub>2</sub> -HexNAc-300 | 939.562      | <sup>302</sup> AKPASAPAVK <sup>311</sup>                     | S <sup>306+</sup> | 9    |

|                  |                                                                                                       |         |   |         |         |                                         |          |                                                      |                     |    |
|------------------|-------------------------------------------------------------------------------------------------------|---------|---|---------|---------|-----------------------------------------|----------|------------------------------------------------------|---------------------|----|
| DOCAB8_<br>ACIBA | Uncharacterized protein<br>[F911_03368] [Acinetobacter<br>baumannii ATCC<br>19606 = CIP 70.34]        | 643.31  | 3 | 1927.91 | 988.35  | HexNAc-Hex <sub>2</sub> -<br>HexNAc-258 | 939.562  | <sup>302</sup> AKPASAPAVK <sup>311</sup>             | S <sup>306+</sup>   | 10 |
| DOCAB8_<br>ACIBA | Uncharacterized protein<br>[F911_03368] [Acinetobacter<br>baumannii ATCC<br>19606 = CIP 70.34]        | 1128.16 | 3 | 3382.47 | 1030.36 | HexNAc-Hex <sub>2</sub> -<br>HexNAc-300 | 2352.114 | <sup>116</sup> KTEASAAAATEQQDSFDAQVQR <sup>136</sup> | S <sup>120</sup>    | 11 |
| DOCDQ9_<br>ACIBA | Uncharacterized protein<br>[F911_00789] [Acinetobacter<br>baumannii ATCC<br>19606 = CIP 70.34]        | 846.38  | 3 | 2536.10 | 1030.36 | HexNAc-Hex <sub>2</sub> -<br>HexNAc-300 | 1505.744 | <sup>40</sup> STAKDEQPASSASVK <sup>54</sup>          | S <sup>51/50+</sup> | 12 |
| DOCEI7_A<br>CIBA | ToIA (Uncharacterized protein)<br>[F911_02604] [Acinetobacter<br>baumannii ATCC 19606 = CIP<br>70.34] | 855.70  | 3 | 2565.10 | 1030.36 | HexNAc-Hex <sub>2</sub> -<br>HexNAc-300 | 1534.734 | <sup>52</sup> QAASDIATATDNASAK <sup>67</sup>         | S <sup>55+</sup>    | 13 |
| DOCEI7_A<br>CIBA | ToIA (Uncharacterized protein)<br>[F911_02604] [Acinetobacter<br>baumannii ATCC 19606 = CIP<br>70.34] | 951.74  | 3 | 2853.20 | 988.35  | HexNAc-Hex <sub>2</sub> -<br>HexNAc-300 | 1864.848 | <sup>48</sup> SAGDQAASDIATATDNASAK <sup>67</sup>     | S <sup>55+</sup>    | 14 |
| DOCEI7_A<br>CIBA | ToIA (Uncharacterized protein)<br>[F911_02604] [Acinetobacter<br>baumannii ATCC 19606 = CIP<br>70.34] | 965.74  | 3 | 2895.21 | 1030.36 | HexNAc-Hex <sub>2</sub> -<br>HexNAc-300 | 1864.852 | <sup>48</sup> SAGDQAASDIATATDNASAK <sup>67</sup>     | S <sup>55+</sup>    | 15 |

**Supplementary table 10A:** Identifications are labeled according to the corresponding Uniprot accession number and protein name. The parent m/z, charge state, deconvoluted mass, glycan mass, peptide mass, peptide sequence and glycan site attachment are provided for each identified glycopeptide. All identified glycopeptide ETD spectra are provided on the corresponding pages

|                               |            |                                                                                                                                                                                                                                                           |
|-------------------------------|------------|-----------------------------------------------------------------------------------------------------------------------------------------------------------------------------------------------------------------------------------------------------------|
| acinetobacter baumannii 19606 |            | $^{34}\text{E} \text{E} \text{E} \text{Q} \text{D} \text{K} \text{V} \text{E} \text{T} \text{A} \text{V} \text{S} \text{E} \text{P} \text{Q} \text{P} \text{Q} \text{K} \text{P} \text{A} \text{K}^{53}$<br>c4 c5 c7 c11<br>z20 z19 z18 z17 z16 z13 z7 z4 |
| Precursor charge:             | +4         |                                                                                                                                                                                                                                                           |
| Precursor m/z:                | 850.13525  |                                                                                                                                                                                                                                                           |
| Peptide mass (MH+):           | 2367.15954 |                                                                                                                                                                                                                                                           |

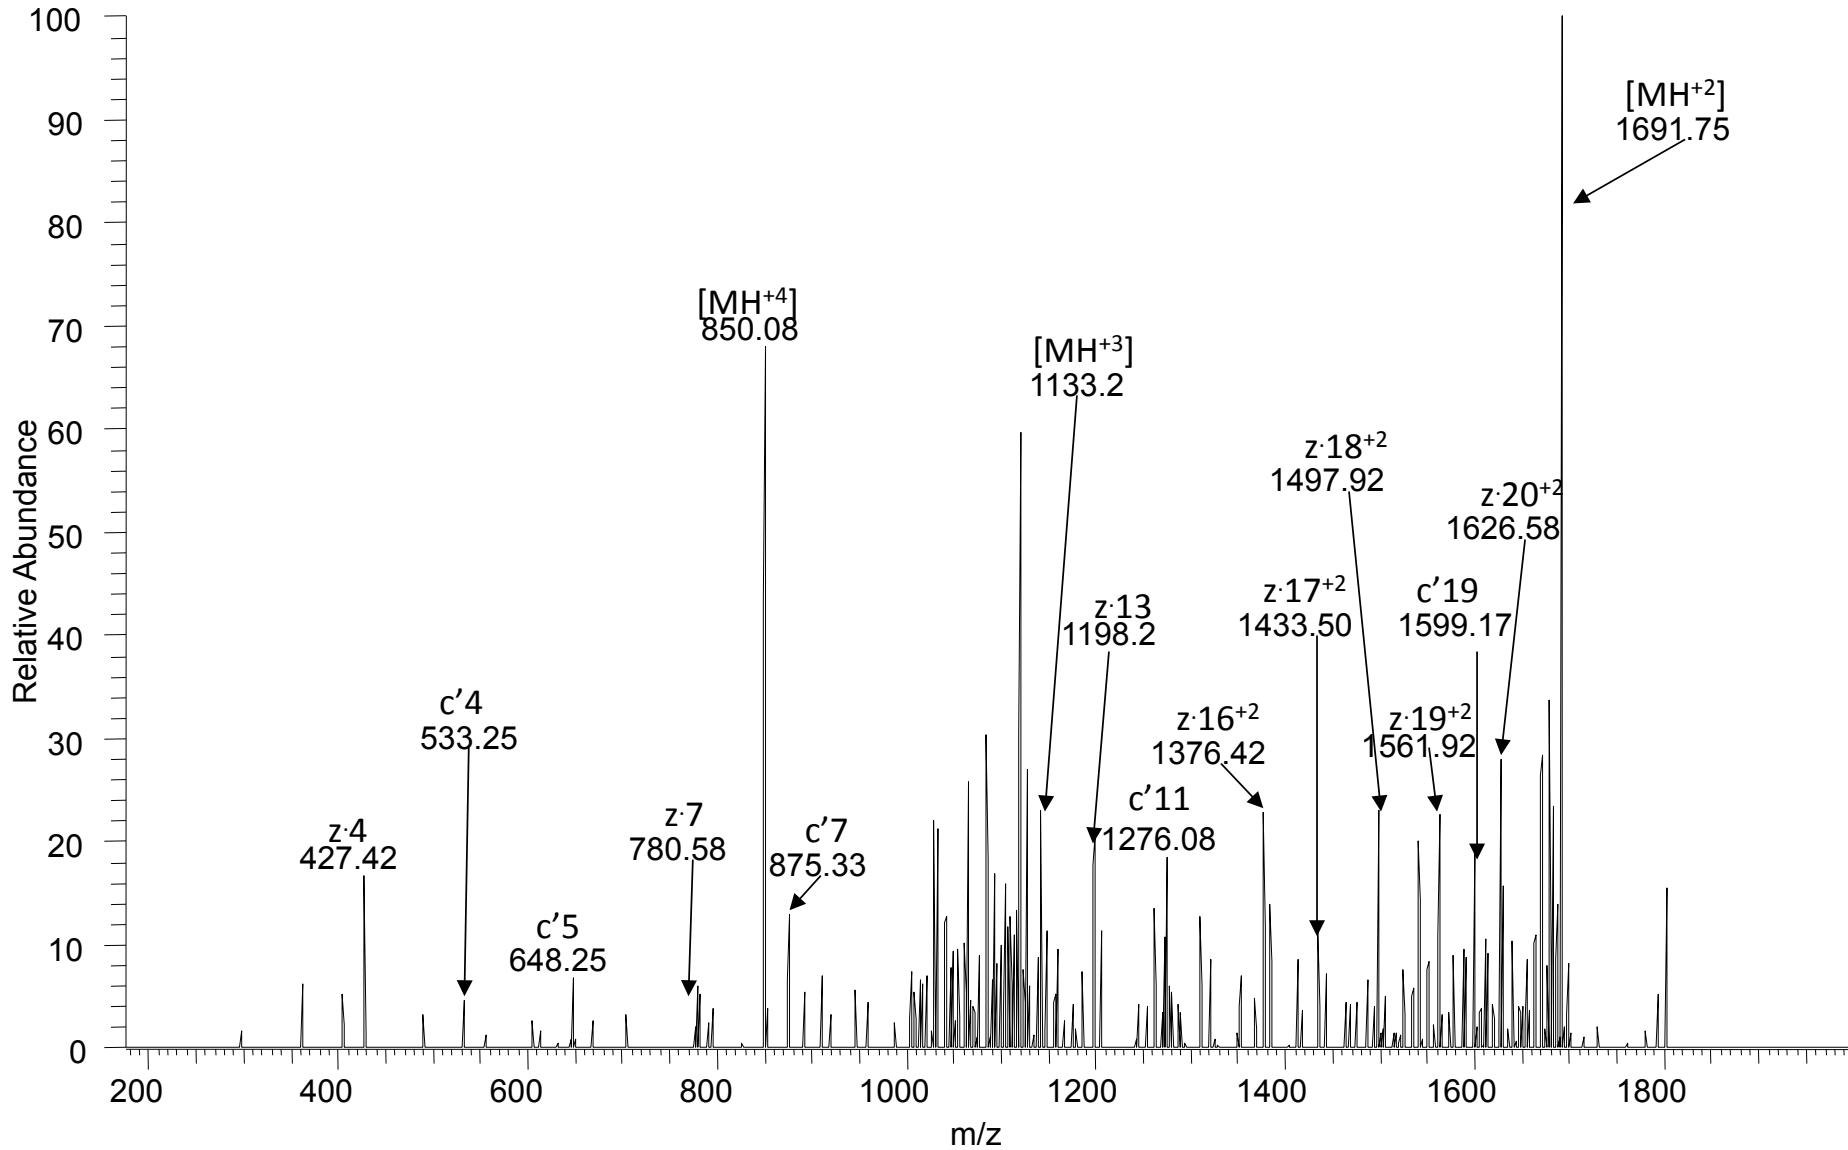

|                                  |           |                                                                                                                                                                                                                                                                                                                                                                                                                                                                                                                  |
|----------------------------------|-----------|------------------------------------------------------------------------------------------------------------------------------------------------------------------------------------------------------------------------------------------------------------------------------------------------------------------------------------------------------------------------------------------------------------------------------------------------------------------------------------------------------------------|
| acinetobacter baumannii 19606    |           | $^{40}\text{V}$ E T $\left\{ \begin{array}{l} \text{A} \text{ V} \\ \text{z}12 \end{array} \right\} \left\{ \begin{array}{l} \text{S} \text{ E} \\ \text{z}10 \end{array} \right\} \left\{ \begin{array}{l} \text{P} \text{ Q} \\ \text{z}9 \end{array} \right\} \left\{ \begin{array}{l} \text{P} \text{ Q} \\ \text{z}7 \end{array} \right\} \left\{ \begin{array}{l} \text{K} \text{ P} \\ \text{z}5 \end{array} \right\} \left\{ \begin{array}{l} \text{A} \text{ K} \\ \text{z}4 \end{array} \right\}^{51}$ |
| Precursor charge:                | +3        |                                                                                                                                                                                                                                                                                                                                                                                                                                                                                                                  |
| Precursor m/z:                   | 866.40688 |                                                                                                                                                                                                                                                                                                                                                                                                                                                                                                                  |
| Peptide mass (MH <sup>+</sup> ): | 2597.1948 |                                                                                                                                                                                                                                                                                                                                                                                                                                                                                                                  |

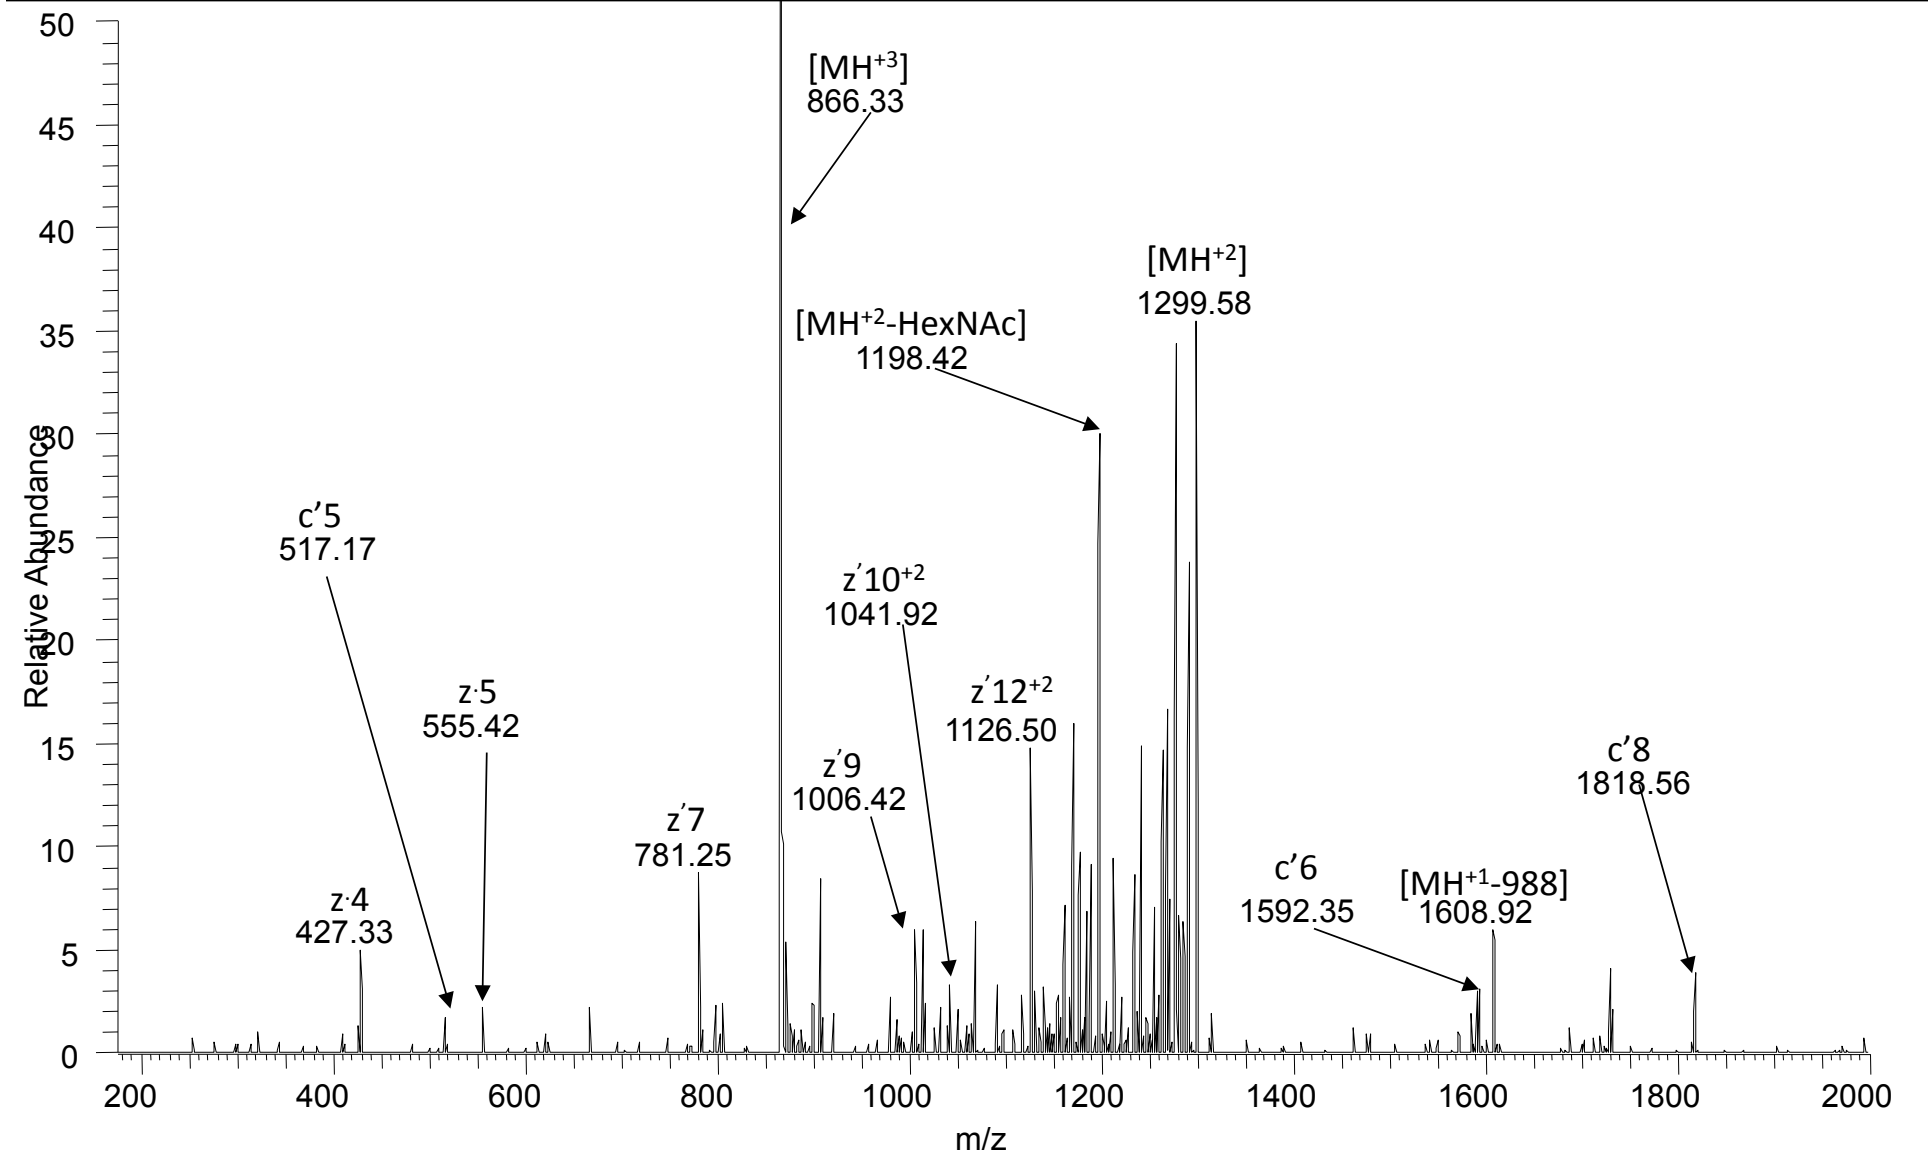

|                                  |           |                                                                                                                                                                                                                                                                                   |  |  |  |  |  |  |  |  |  |  |  |
|----------------------------------|-----------|-----------------------------------------------------------------------------------------------------------------------------------------------------------------------------------------------------------------------------------------------------------------------------------|--|--|--|--|--|--|--|--|--|--|--|
| acinetobacter baumannii 19606    |           | $c_2$ $c_3$ $c_4$ $c_5$ $c_6$ $c_8$ $c_9$ $c_{10}$ $c_{11}$ $c_{12}$<br>$^{28}K$ E E A A Q A G Q D A A S T A V A D K $^{46}$<br><span style="margin-left: 100px;"><math>z_{10}</math> <math>z_9</math> <math>z_8</math> <math>z_7</math> <math>z_6</math> <math>z_5</math></span> |  |  |  |  |  |  |  |  |  |  |  |
| Precursor charge:                | +3        |                                                                                                                                                                                                                                                                                   |  |  |  |  |  |  |  |  |  |  |  |
| Precursor m/z:                   | 964.42273 |                                                                                                                                                                                                                                                                                   |  |  |  |  |  |  |  |  |  |  |  |
| Peptide mass (MH <sup>+</sup> ): | 2891.2523 |                                                                                                                                                                                                                                                                                   |  |  |  |  |  |  |  |  |  |  |  |

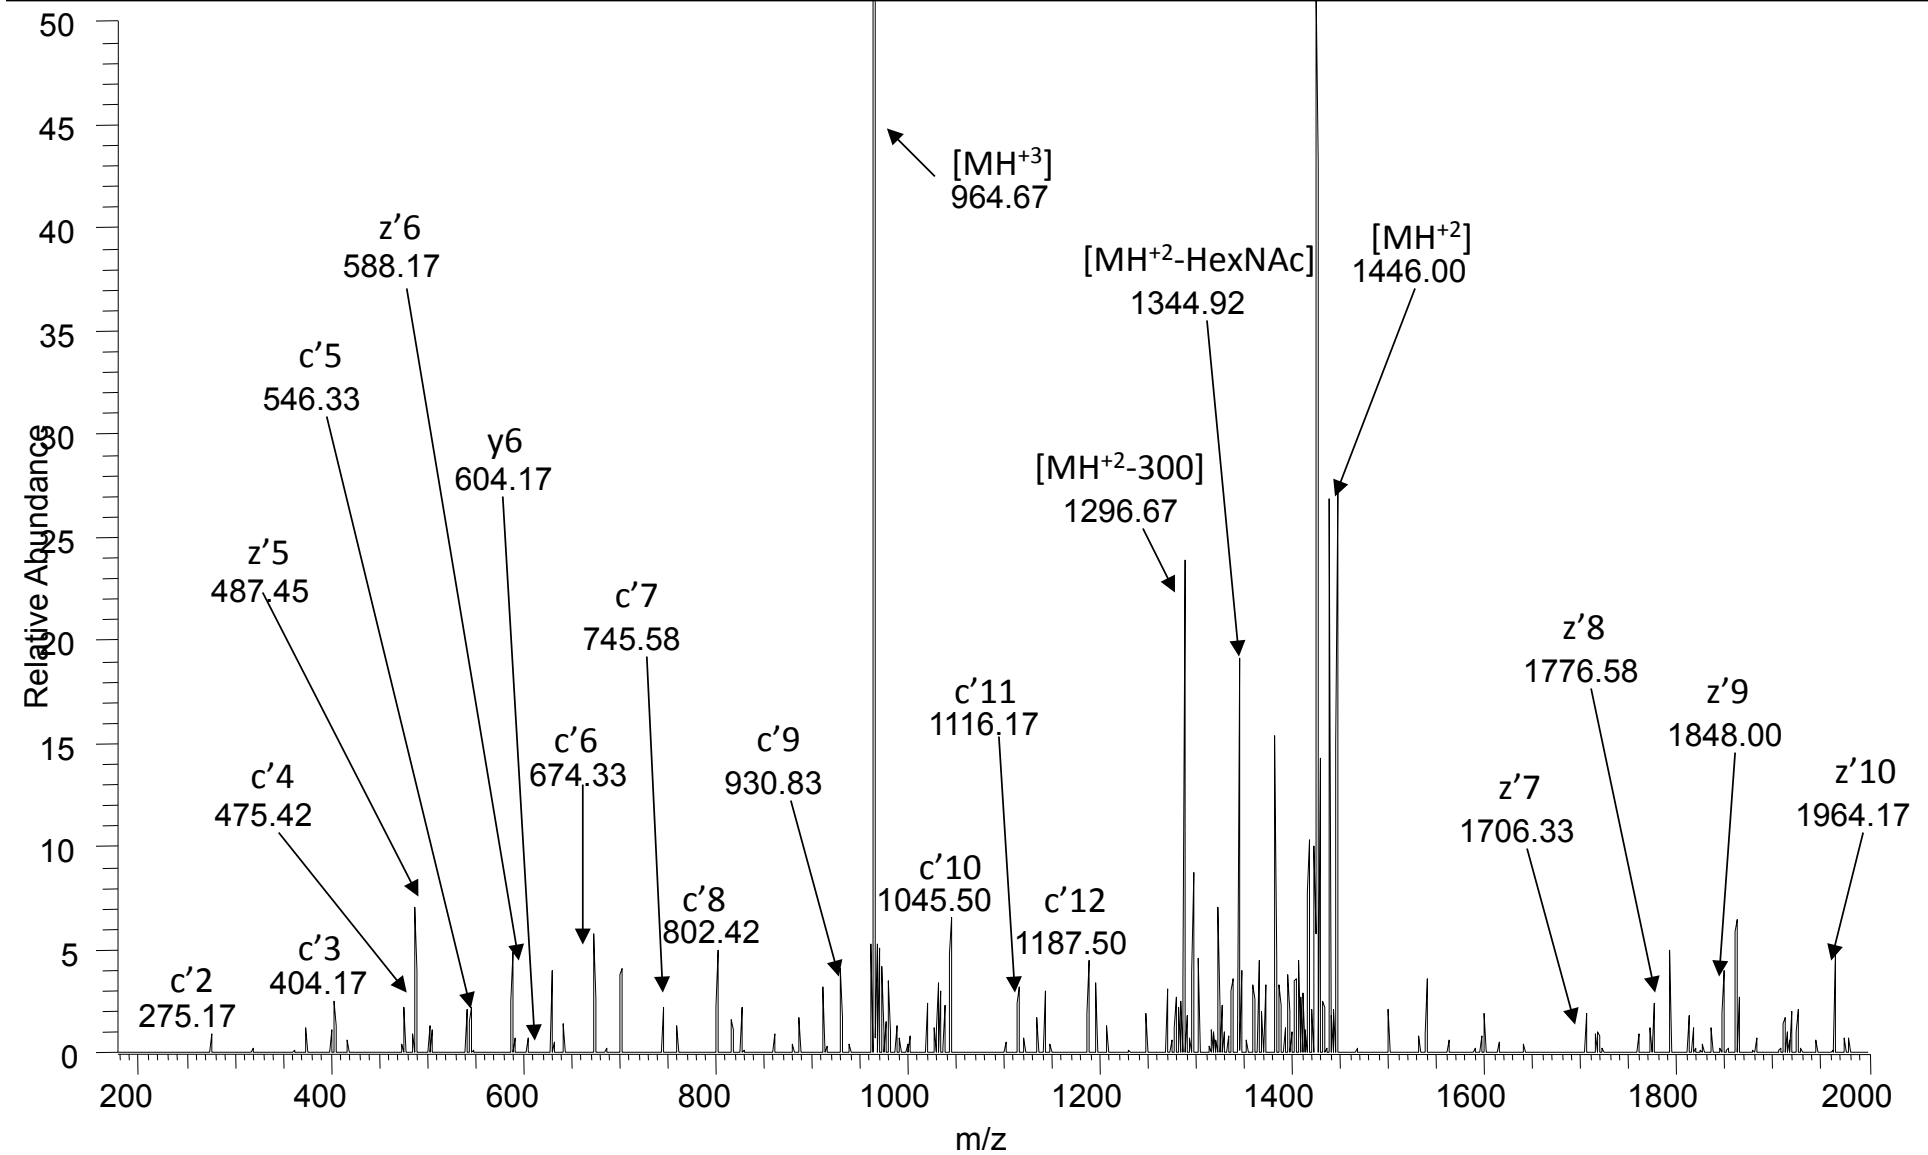

|                                  |            |                                                                     |  |
|----------------------------------|------------|---------------------------------------------------------------------|--|
| acinetobacter baumannii 19606    |            | $^{28}\text{N}$ D G M(+16) H E A S D P A T S H D M(+16) N K $^{45}$ |  |
| Precursor charge:                | +3         |                                                                     |  |
| Precursor m/z:                   | 1007.04865 |                                                                     |  |
| Peptide mass (MH <sup>+</sup> ): | 3019.13007 |                                                                     |  |

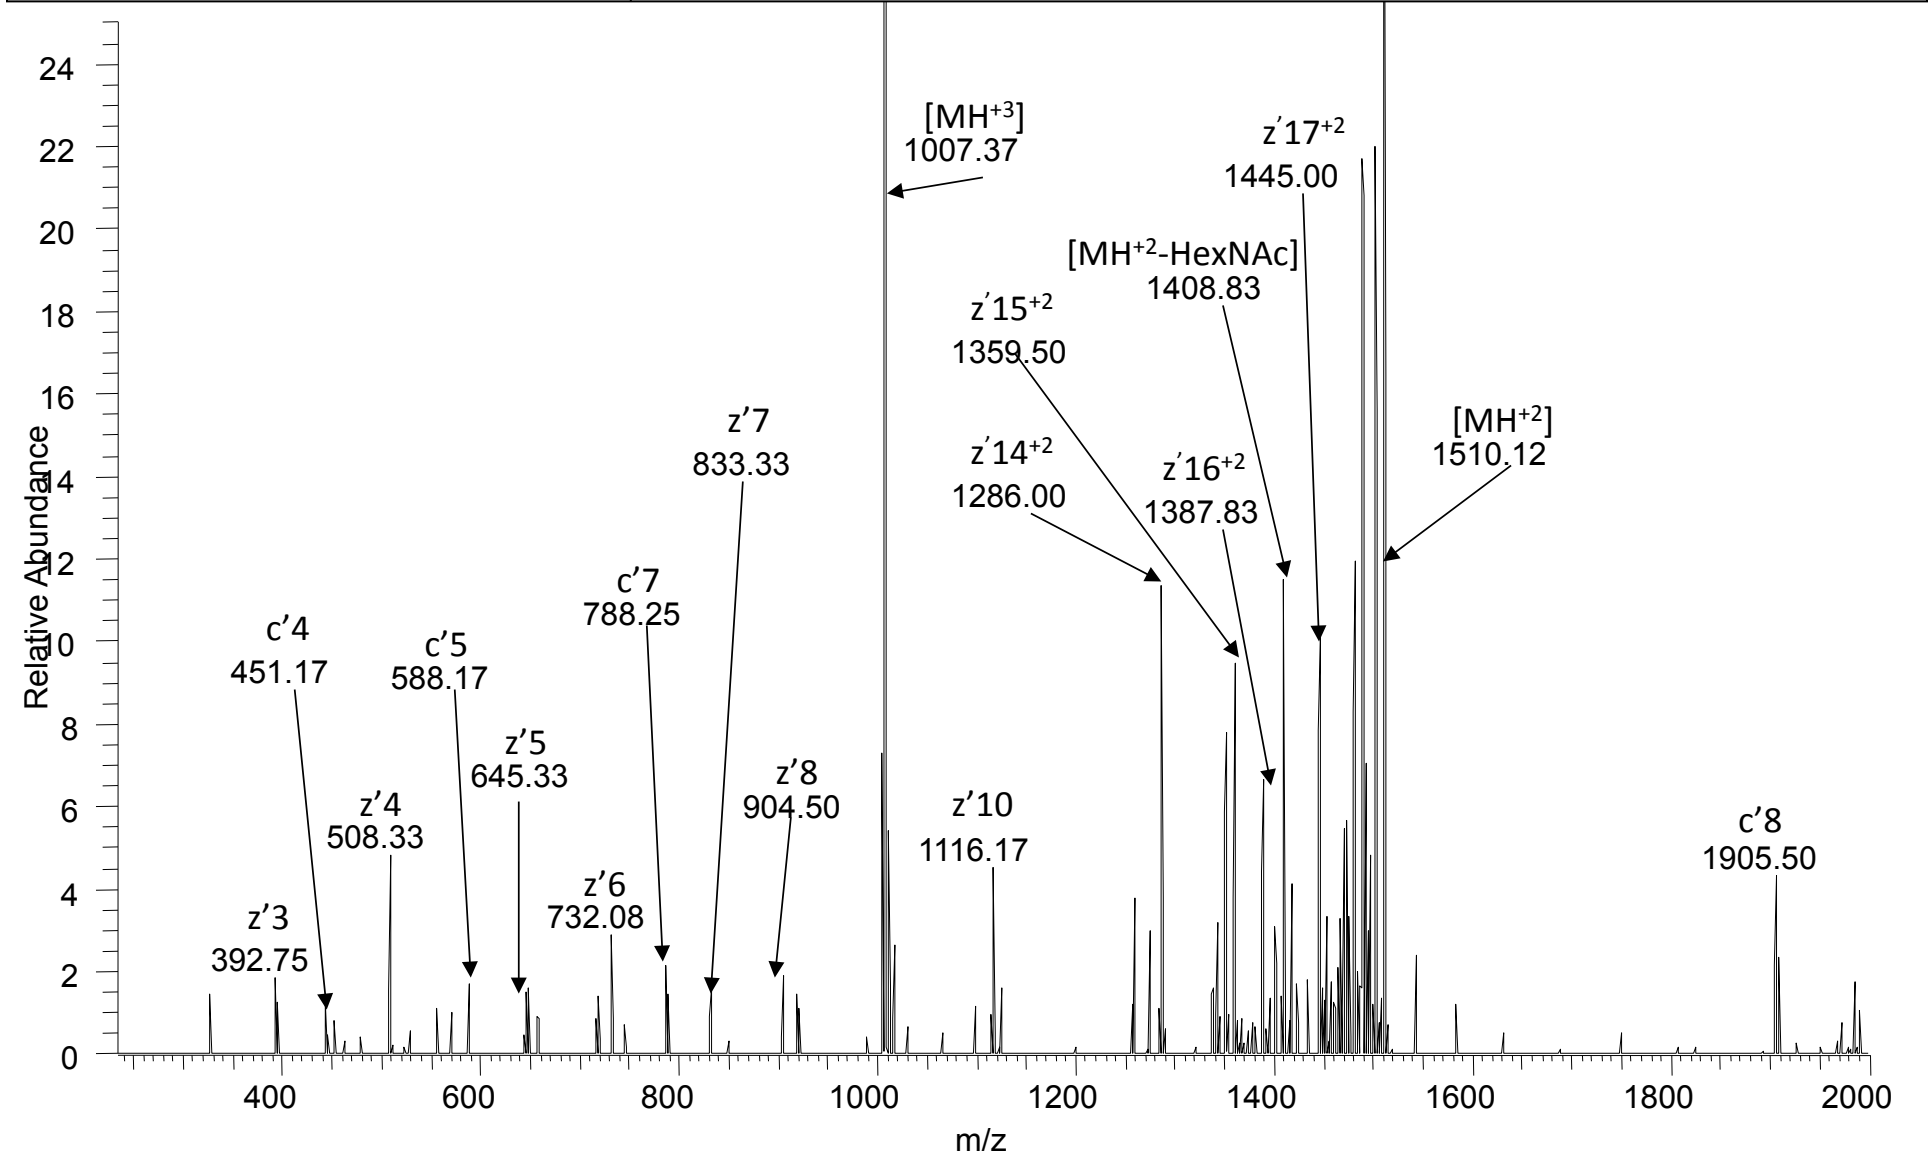

|                               |            |                     |  |
|-------------------------------|------------|---------------------|--|
| acinetobacter baumannii 19606 |            | $^{28}\text{N}(+1)$ |  |
| Precursor charge:             | +4         |                     |  |
| Precursor m/z:                | 755.78442  |                     |  |
| Peptide mass (MH+):           | 3020.11386 |                     |  |

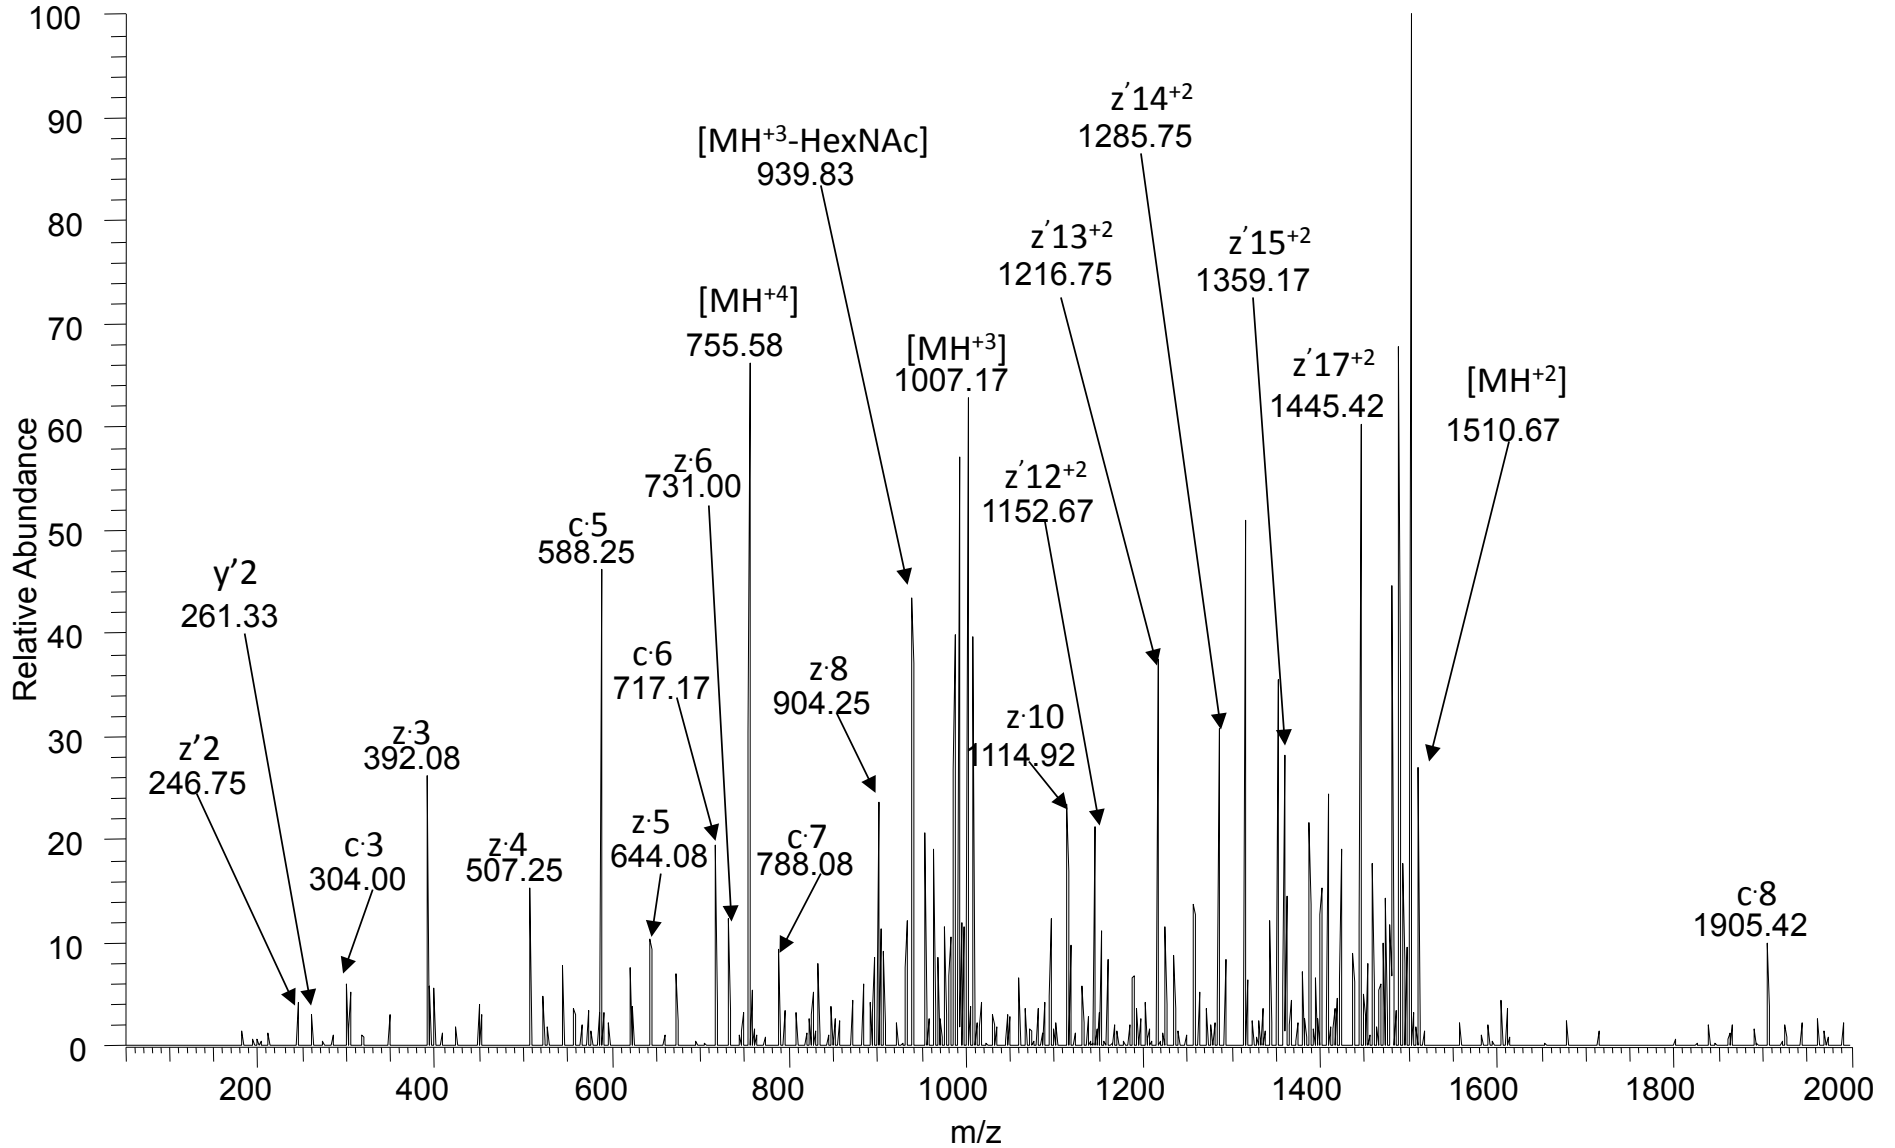

|                               |            |                                                                                                             |                     |
|-------------------------------|------------|-------------------------------------------------------------------------------------------------------------|---------------------|
| acinetobacter baumannii 19606 |            | $^{28}\text{N}$   D   G   M(+16)   H   E   A   S   D   P   A   T   S   H   D   M(+16)   N   K <sup>45</sup> |                     |
| Precursor charge:             | +4         | c3                                                                                                          | c5 c6               |
| Precursor m/z:                | 755.04230  | z17                                                                                                         | z14 z13             |
| Peptide mass (MH+):           | 3017.14538 |                                                                                                             | z10/y10 z6 z5 z4 z3 |

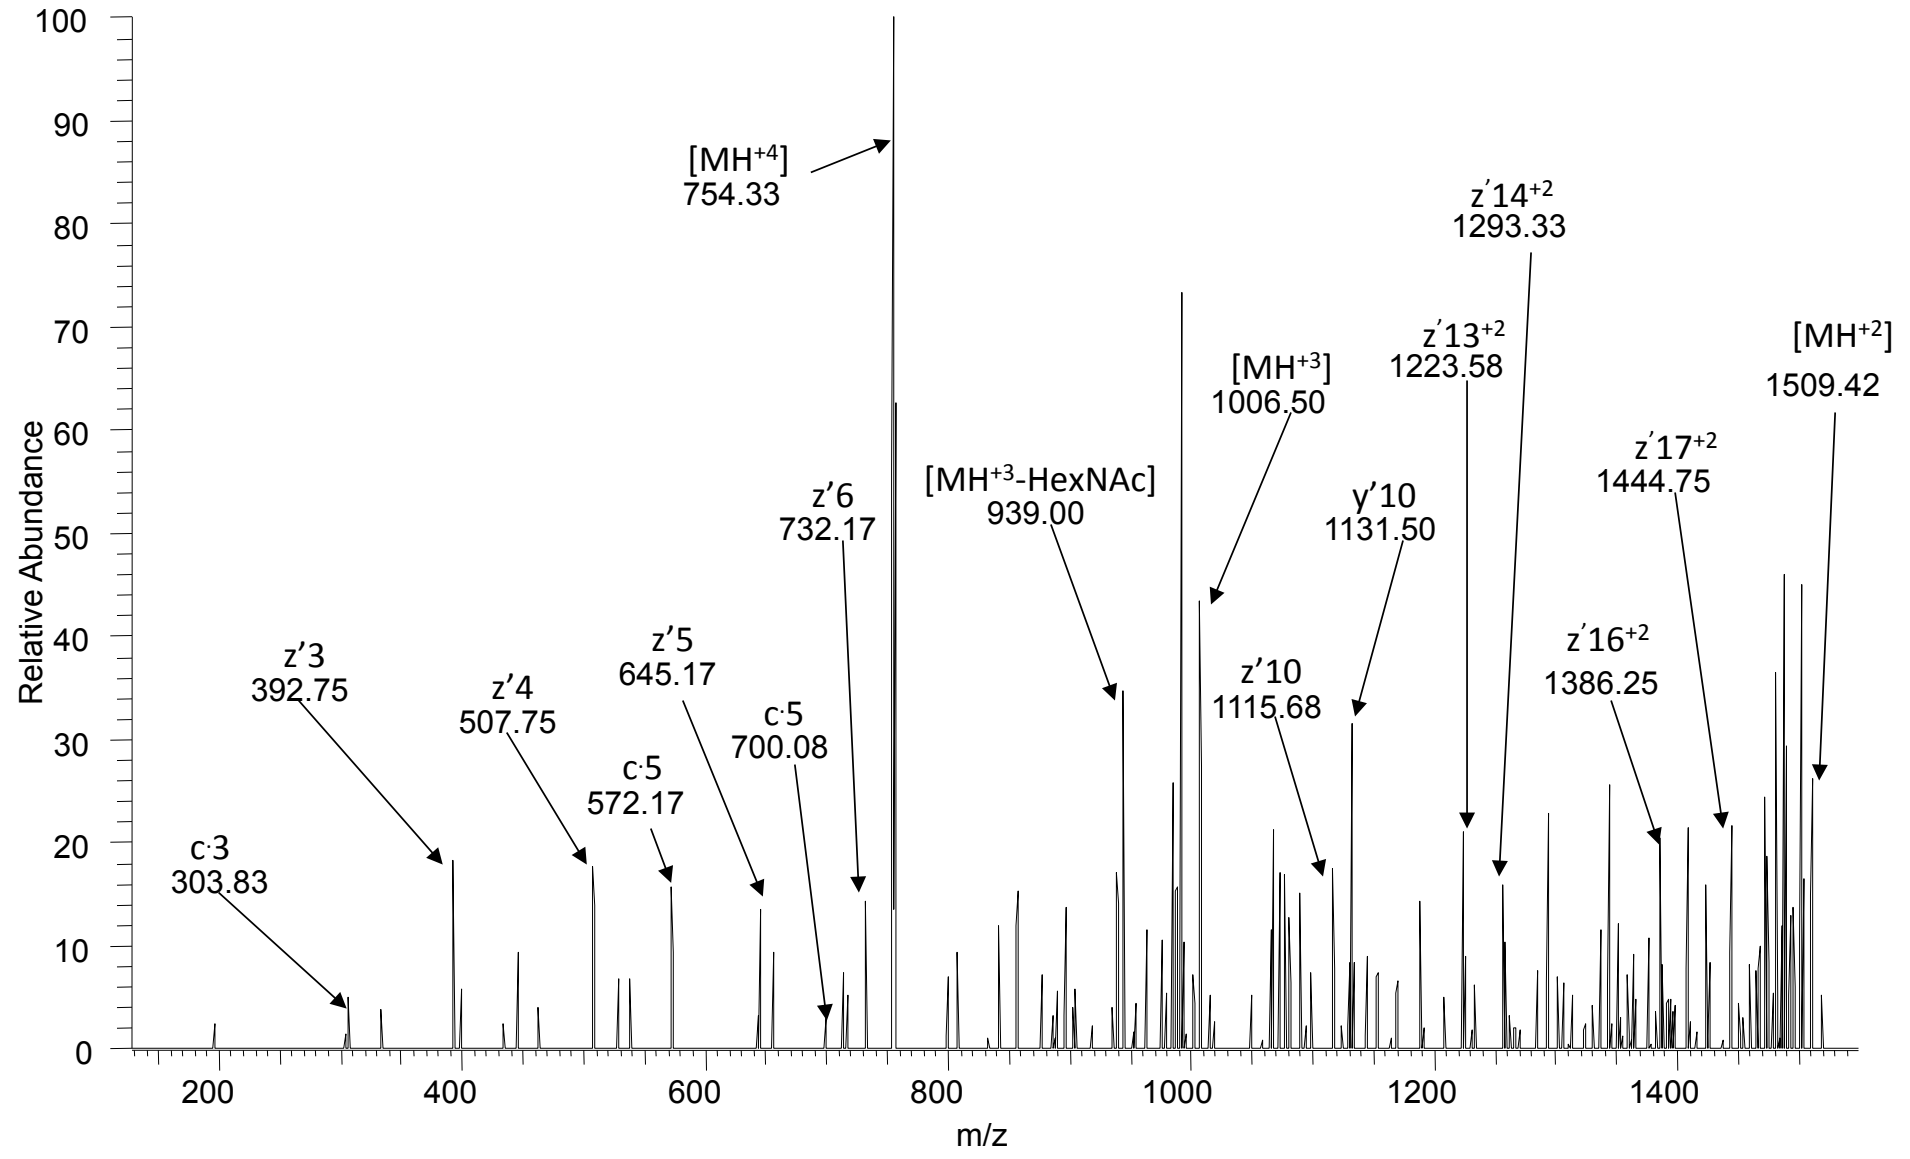



|                               |          |     |  |    |   |    |   |    |   |    |   |    |   |     |
|-------------------------------|----------|-----|--|----|---|----|---|----|---|----|---|----|---|-----|
| acinetobacter baumannii 19606 |          |     |  |    |   |    |   |    |   |    |   |    |   |     |
| Precursor charge:             | +3       | 302 |  | A  | K | P  | A | S  | A | P  | A | V  | K | 311 |
| Precursor m/z:                | 657.3183 |     |  | z9 |   | z7 |   | z6 |   | z5 |   | z3 |   |     |
| Peptide mass (MH+):           | 1969.94  |     |  |    |   |    |   |    |   |    |   |    |   |     |

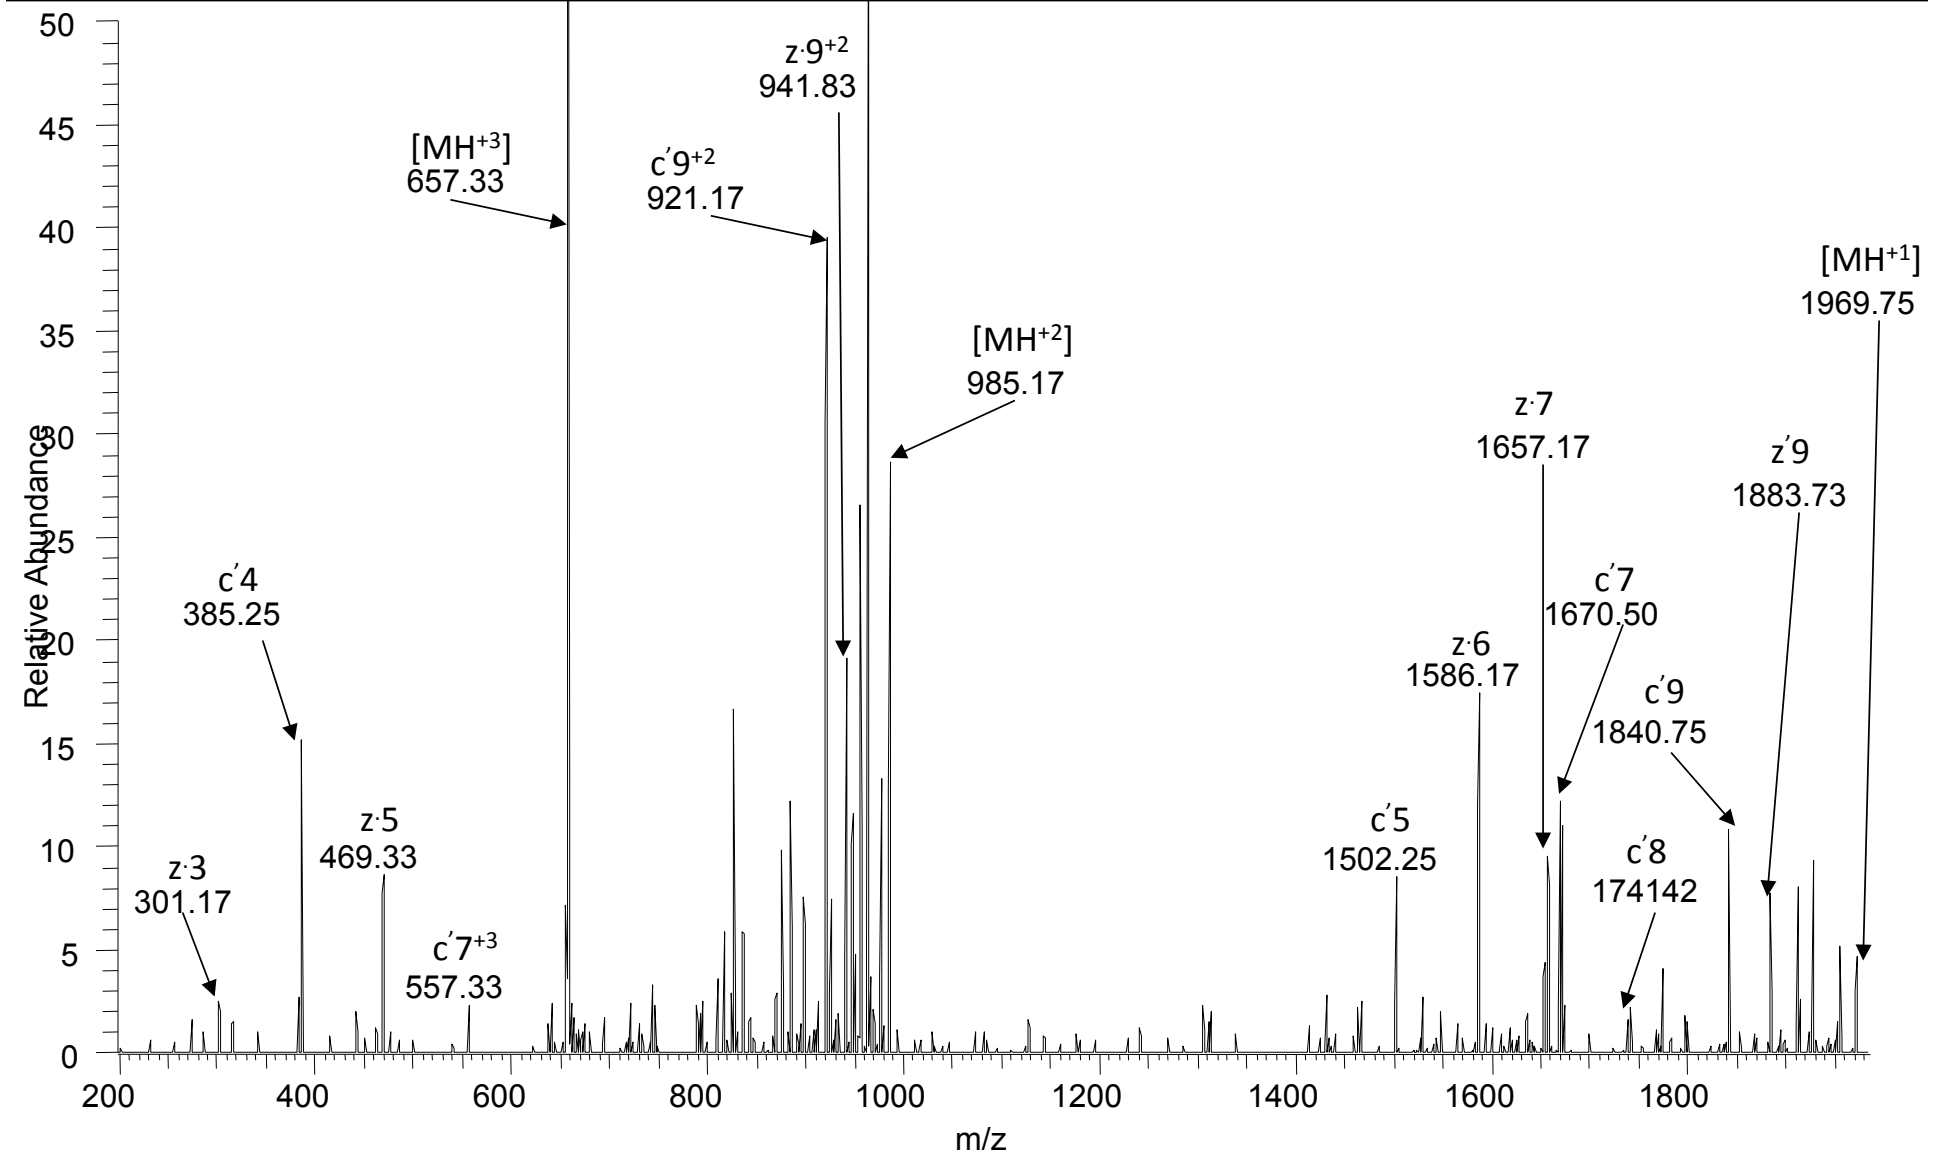

|                                  |            |                                                                                                                                                                                                                                                                                                                                                                                                                                          |  |
|----------------------------------|------------|------------------------------------------------------------------------------------------------------------------------------------------------------------------------------------------------------------------------------------------------------------------------------------------------------------------------------------------------------------------------------------------------------------------------------------------|--|
| acinetobacter baumannii 19606    |            |                                                                                                                                                                                                                                                                                                                                                                                                                                          |  |
| Precursor charge:                | +3         | $302$ A $\left\{ \begin{array}{l} c4 \\ z9 \end{array} \right\}$ K P $\left\{ \begin{array}{l} c4 \\ z7 \end{array} \right\}$ A $\left\{ \begin{array}{l} c5 \\ z6 \end{array} \right\}$ S $\left\{ \begin{array}{l} c7 \\ z5 \end{array} \right\}$ A P $\left\{ \begin{array}{l} c8 \\ z3 \end{array} \right\}$ A $\left\{ \begin{array}{l} c9 \end{array} \right\}$ V $\left\{ \begin{array}{l} c8 \\ c9 \end{array} \right\}$ K $311$ |  |
| Precursor m/z:                   | 643.30884  |                                                                                                                                                                                                                                                                                                                                                                                                                                          |  |
| Peptide mass (MH <sup>+</sup> ): | 1927.91064 |                                                                                                                                                                                                                                                                                                                                                                                                                                          |  |

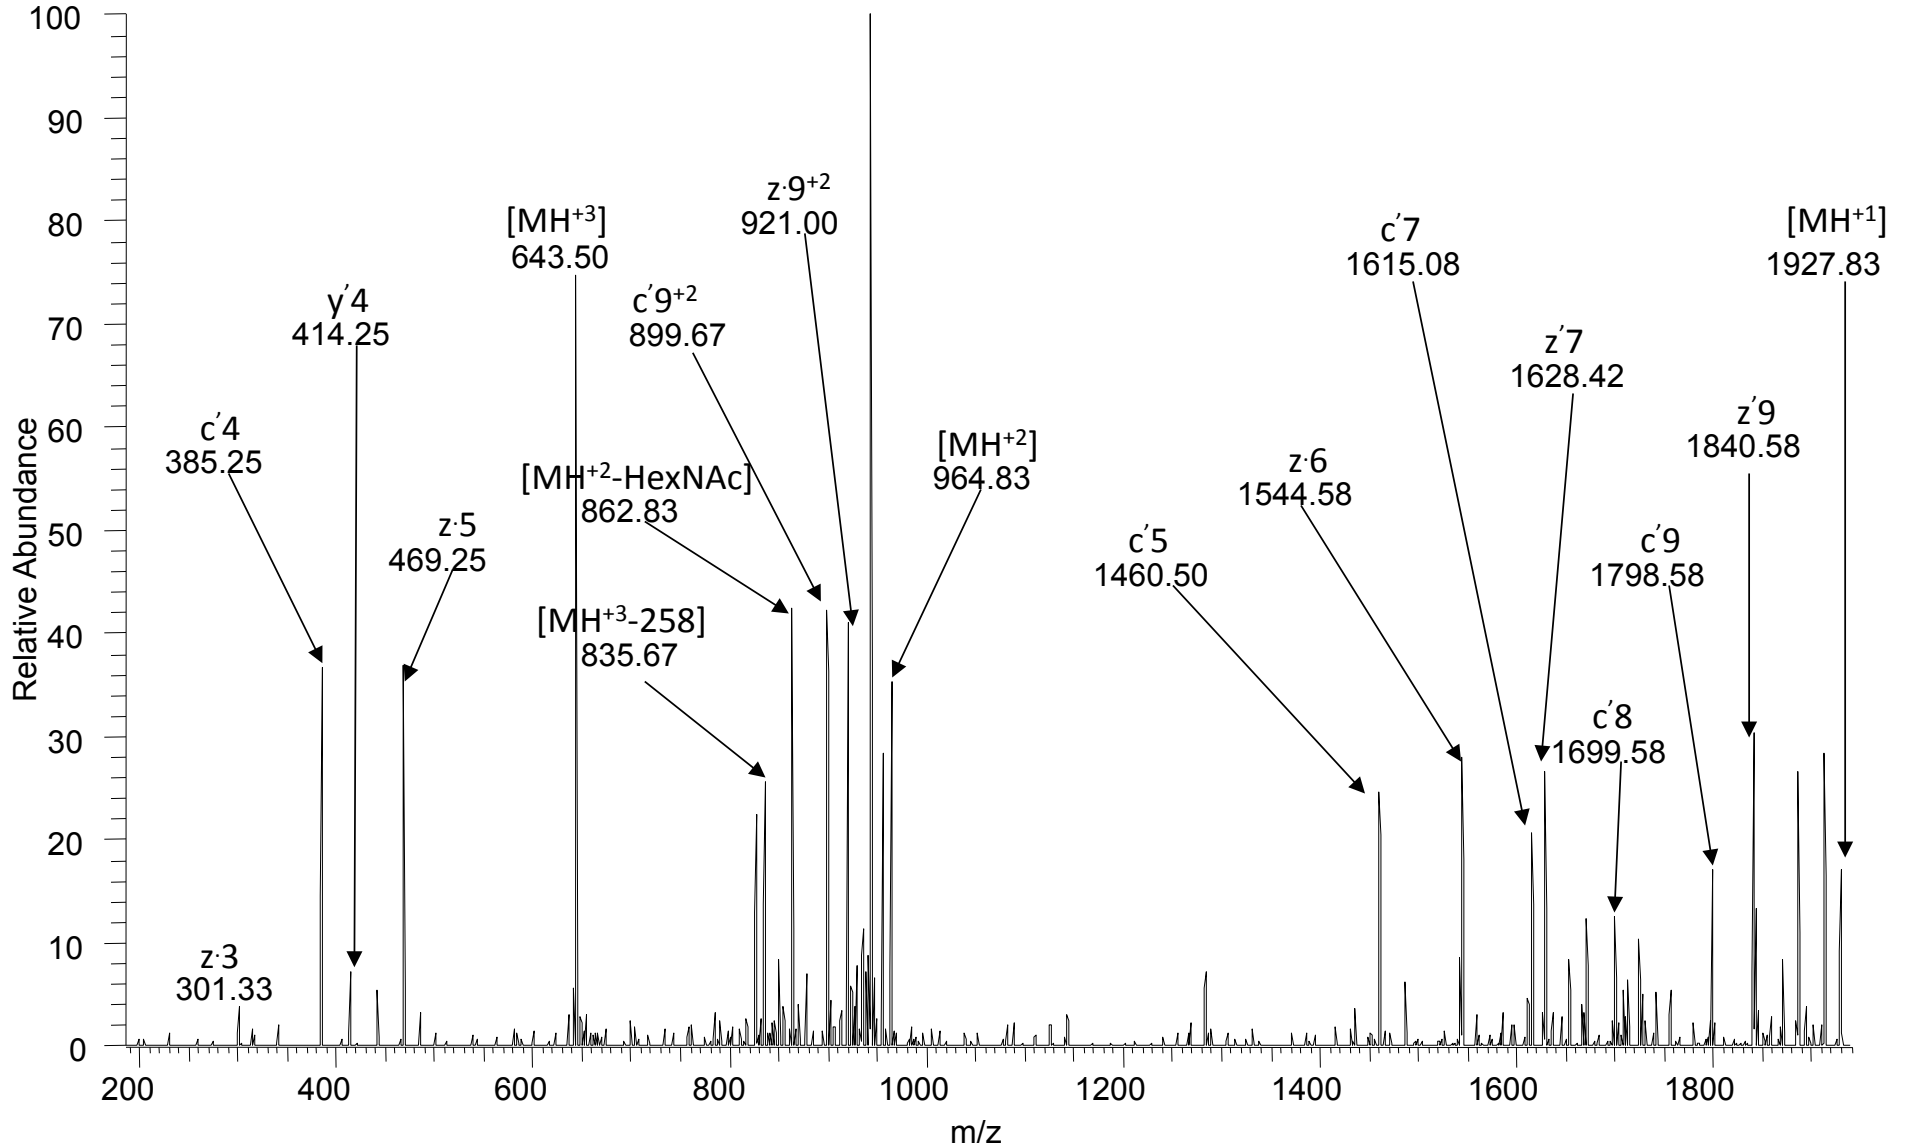

|                                             |  |
|---------------------------------------------|--|
| acinetobacter baumannii 19606               |  |
| Precursor charge: +3                        |  |
| Precursor m/z: 1128.16248                   |  |
| Peptide mass (MH <sup>+</sup> ): 3382.47156 |  |

<sup>116</sup>K T E A S

<sup>c3</sup> | <sup>c4</sup> |

<sup>z17</sup> | A A A A T

<sup>c10</sup> |

<sup>z12</sup> | <sup>z11</sup> | <sup>z10</sup> | <sup>z9</sup> | <sup>z8</sup> | <sup>z7</sup> |

<sup>z6</sup> | <sup>z5</sup> | <sup>z4</sup>

E Q Q D S F D A Q V Q R<sup>136</sup>

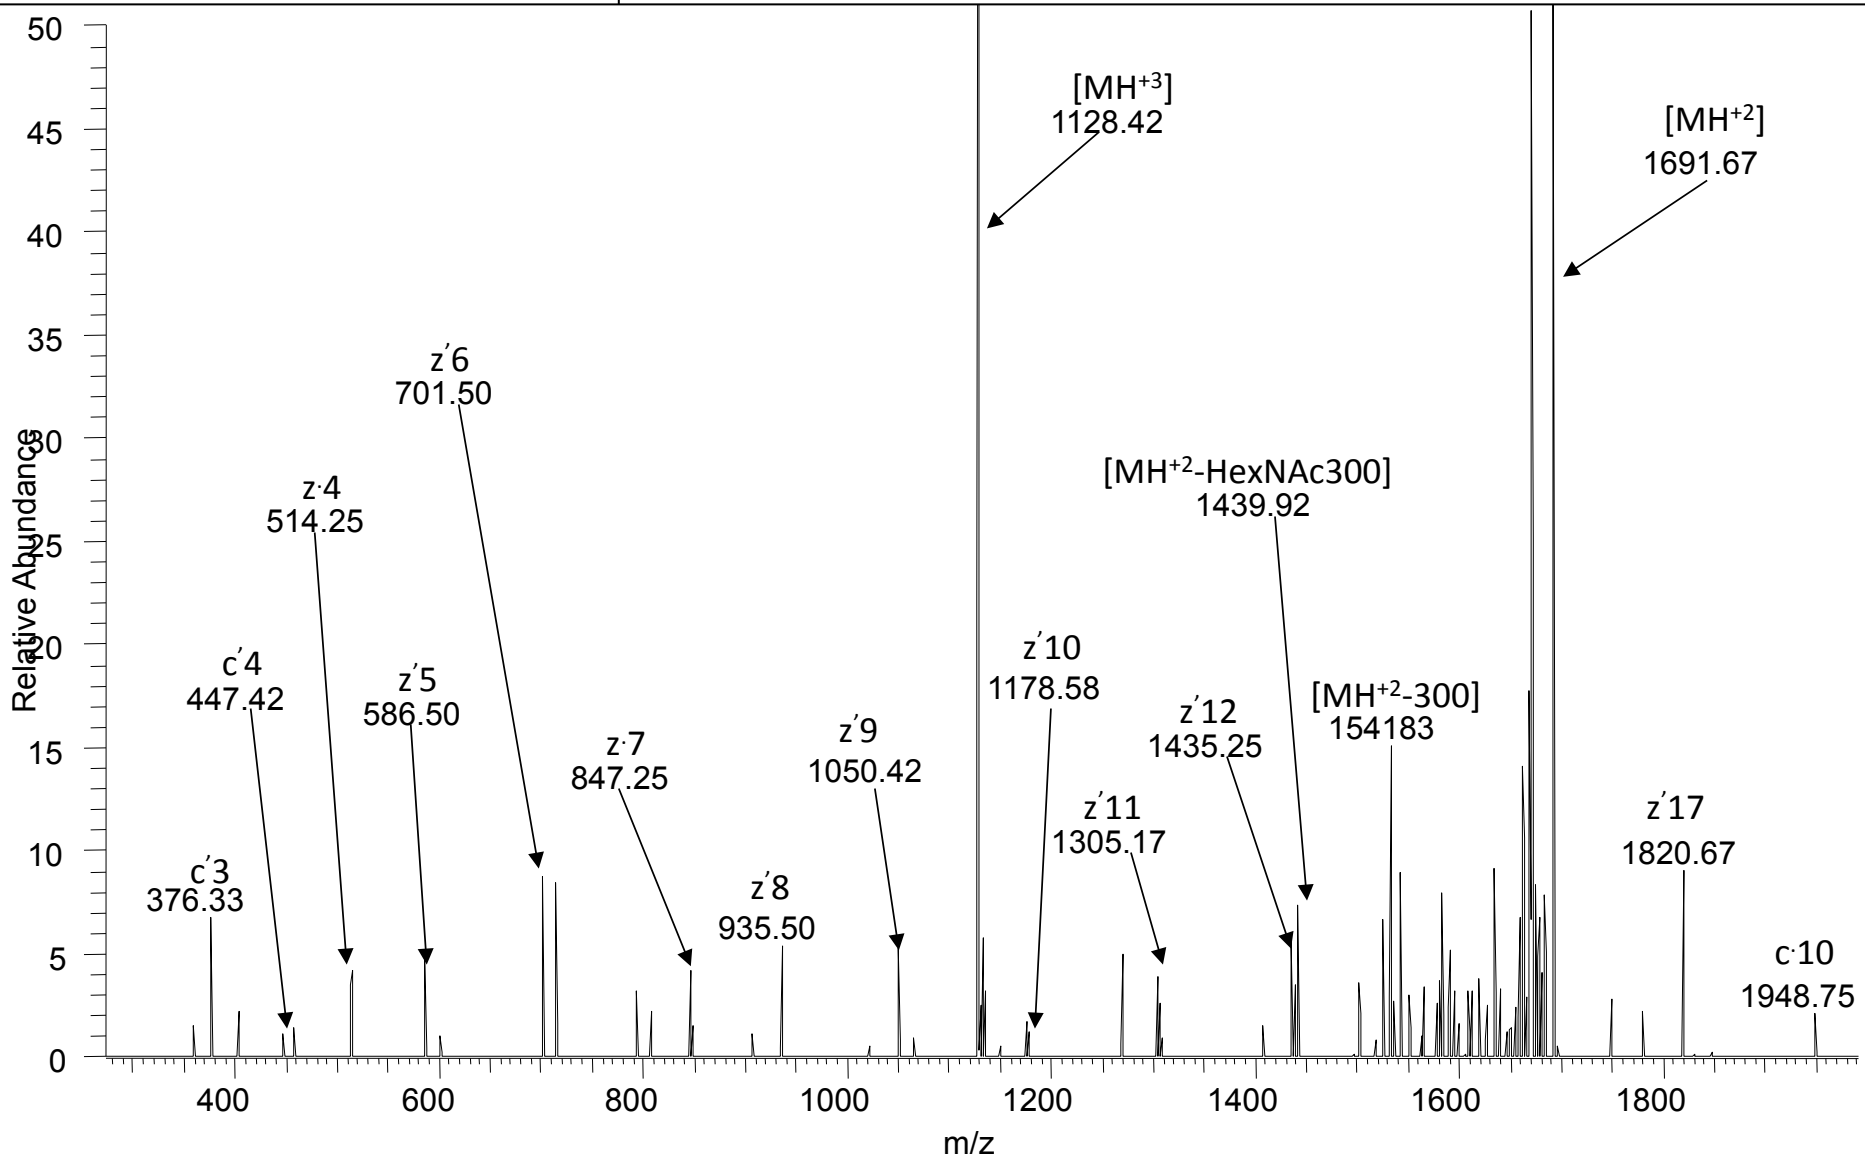

|                               |                                     |
|-------------------------------|-------------------------------------|
| acinetobacter baumannii 19606 |                                     |
| Precursor charge: +3          | 50 S T A K D E Q P A S S A S V K 54 |
| Precursor m/z: 846.37618      | z14 z13 z12 z9 z7 z6 z5 z4          |
| Peptide mass (MH+): 2536.1046 | c4 c5 c6 c12 c13 c14                |

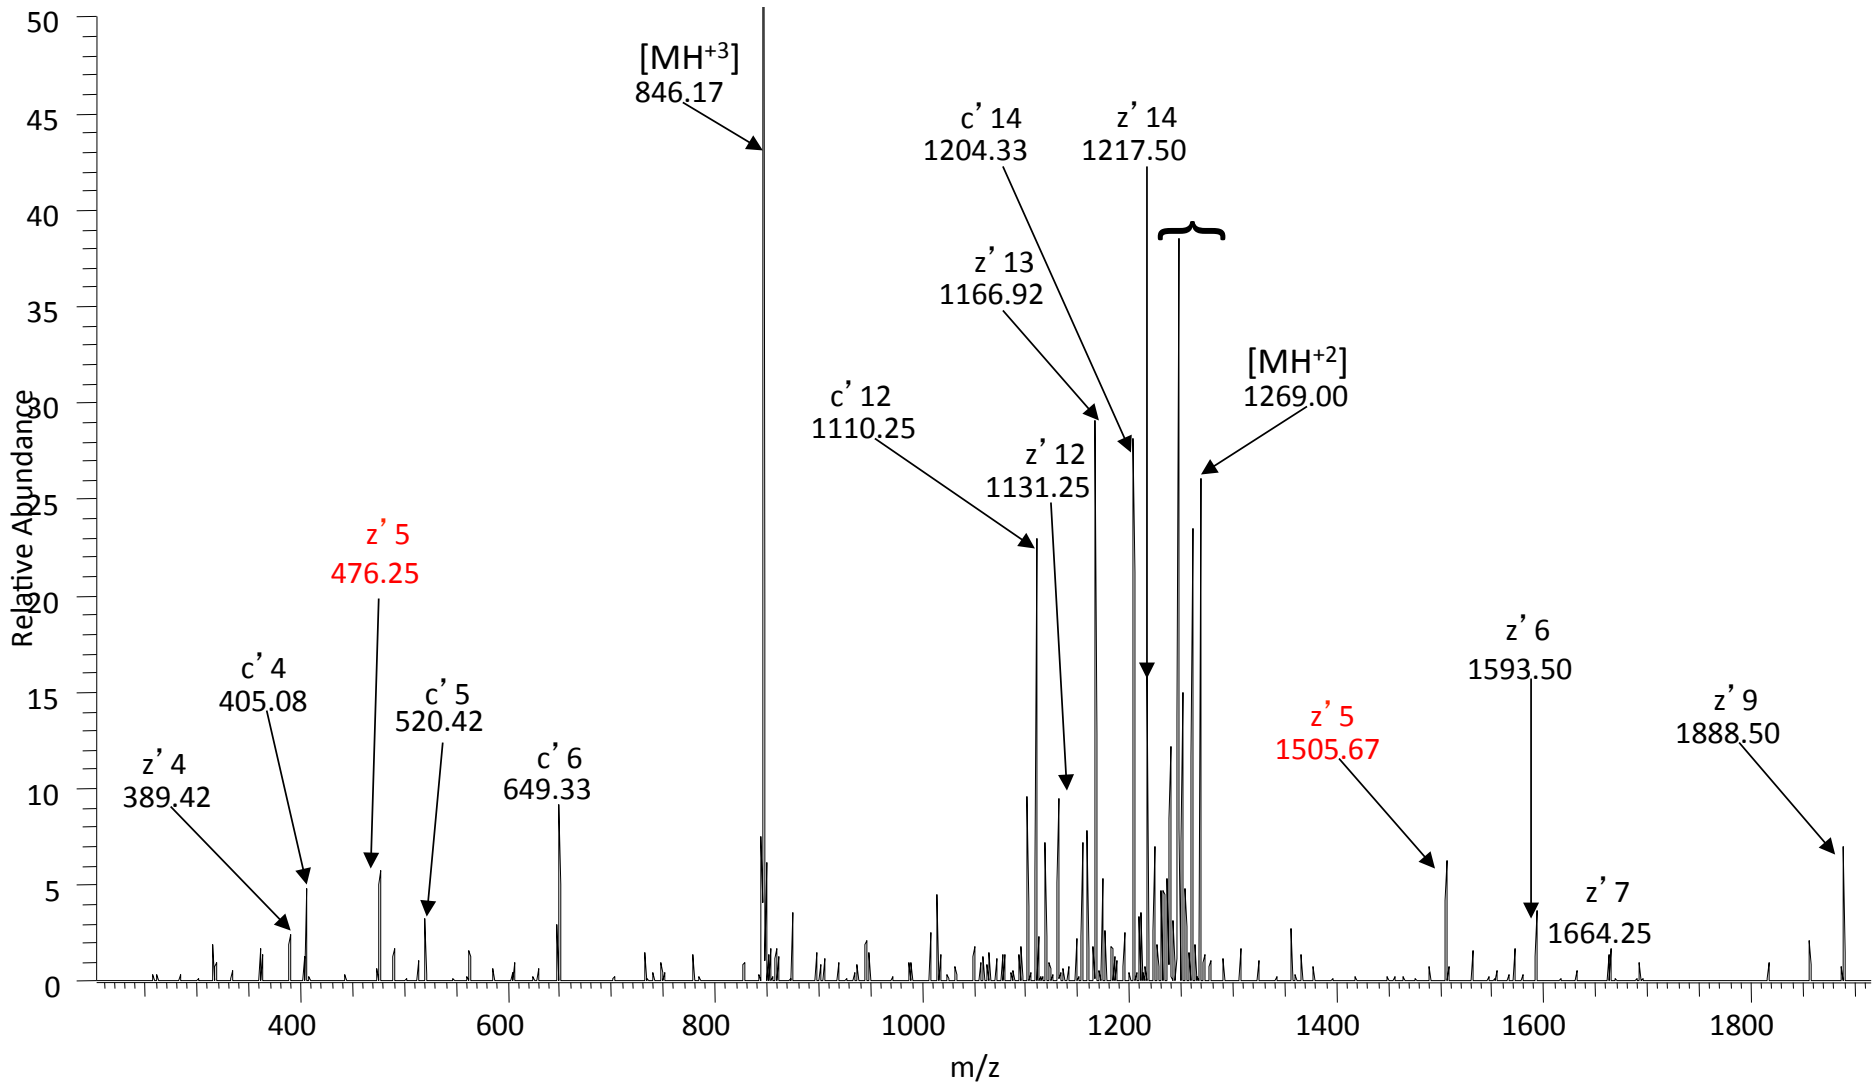

|                               |            |                                                                                                                                      |  |
|-------------------------------|------------|--------------------------------------------------------------------------------------------------------------------------------------|--|
| acinetobacter baumannii 19606 |            | $c4$ $c5$ $c7$ $c8$ $c10$<br>$^{52}Q$ A A S   D   I   A   T   A   T   D   N   A S A $K^{67}$<br>$z11$ $z10$ $z8$ $z7$ $z6$ $z5$ $z4$ |  |
| Precursor charge:             | +3         |                                                                                                                                      |  |
| Precursor m/z:                | 855.70392  |                                                                                                                                      |  |
| Peptide mass (MH+):           | 2565.09588 |                                                                                                                                      |  |

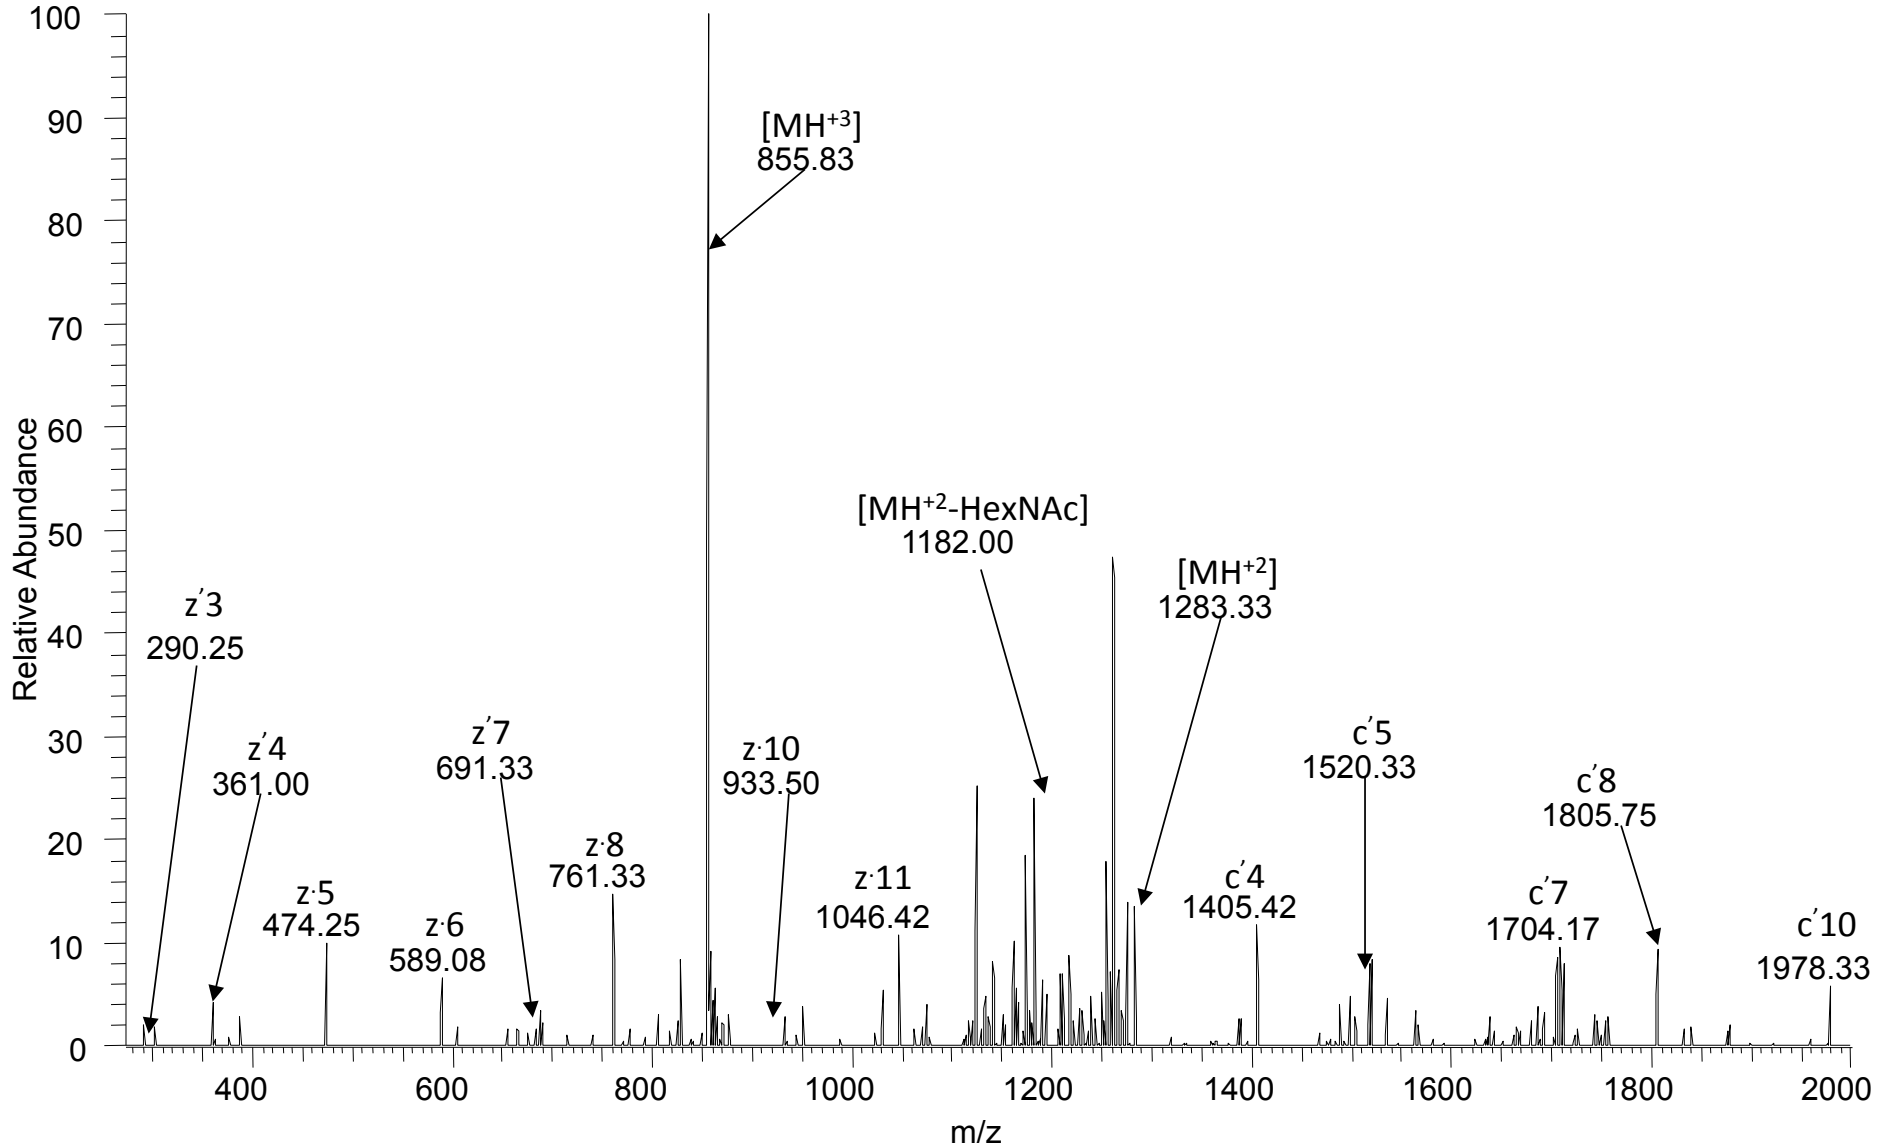

|                                  |            |                                                                                                                                                                                                                                                                                                                                                                                                                                                                                                       |  |
|----------------------------------|------------|-------------------------------------------------------------------------------------------------------------------------------------------------------------------------------------------------------------------------------------------------------------------------------------------------------------------------------------------------------------------------------------------------------------------------------------------------------------------------------------------------------|--|
| acinetobacter baumannii 19606    |            | $^{58}\text{S}$ A G D Q A $\left\{ \begin{array}{l} \text{c6} \\ \text{z12} \end{array} \right.$ A S $\left\{ \begin{array}{l} \text{c10} \\ \text{z11} \end{array} \right.$ A T $\left\{ \begin{array}{l} \text{c11} \\ \text{z9} \end{array} \right.$ A T $\left\{ \begin{array}{l} \text{z8} \\ \text{z7} \end{array} \right.$ D $\left\{ \begin{array}{l} \text{z6} \\ \text{z5} \end{array} \right.$ N $\left\{ \begin{array}{l} \text{z4} \\ \text{y3} \end{array} \right.$ S A $\text{K}^{67}$ |  |
| Precursor charge:                | +3         |                                                                                                                                                                                                                                                                                                                                                                                                                                                                                                       |  |
| Precursor m/z:                   | 951.73907  |                                                                                                                                                                                                                                                                                                                                                                                                                                                                                                       |  |
| Peptide mass (MH <sup>+</sup> ): | 2853.19762 |                                                                                                                                                                                                                                                                                                                                                                                                                                                                                                       |  |

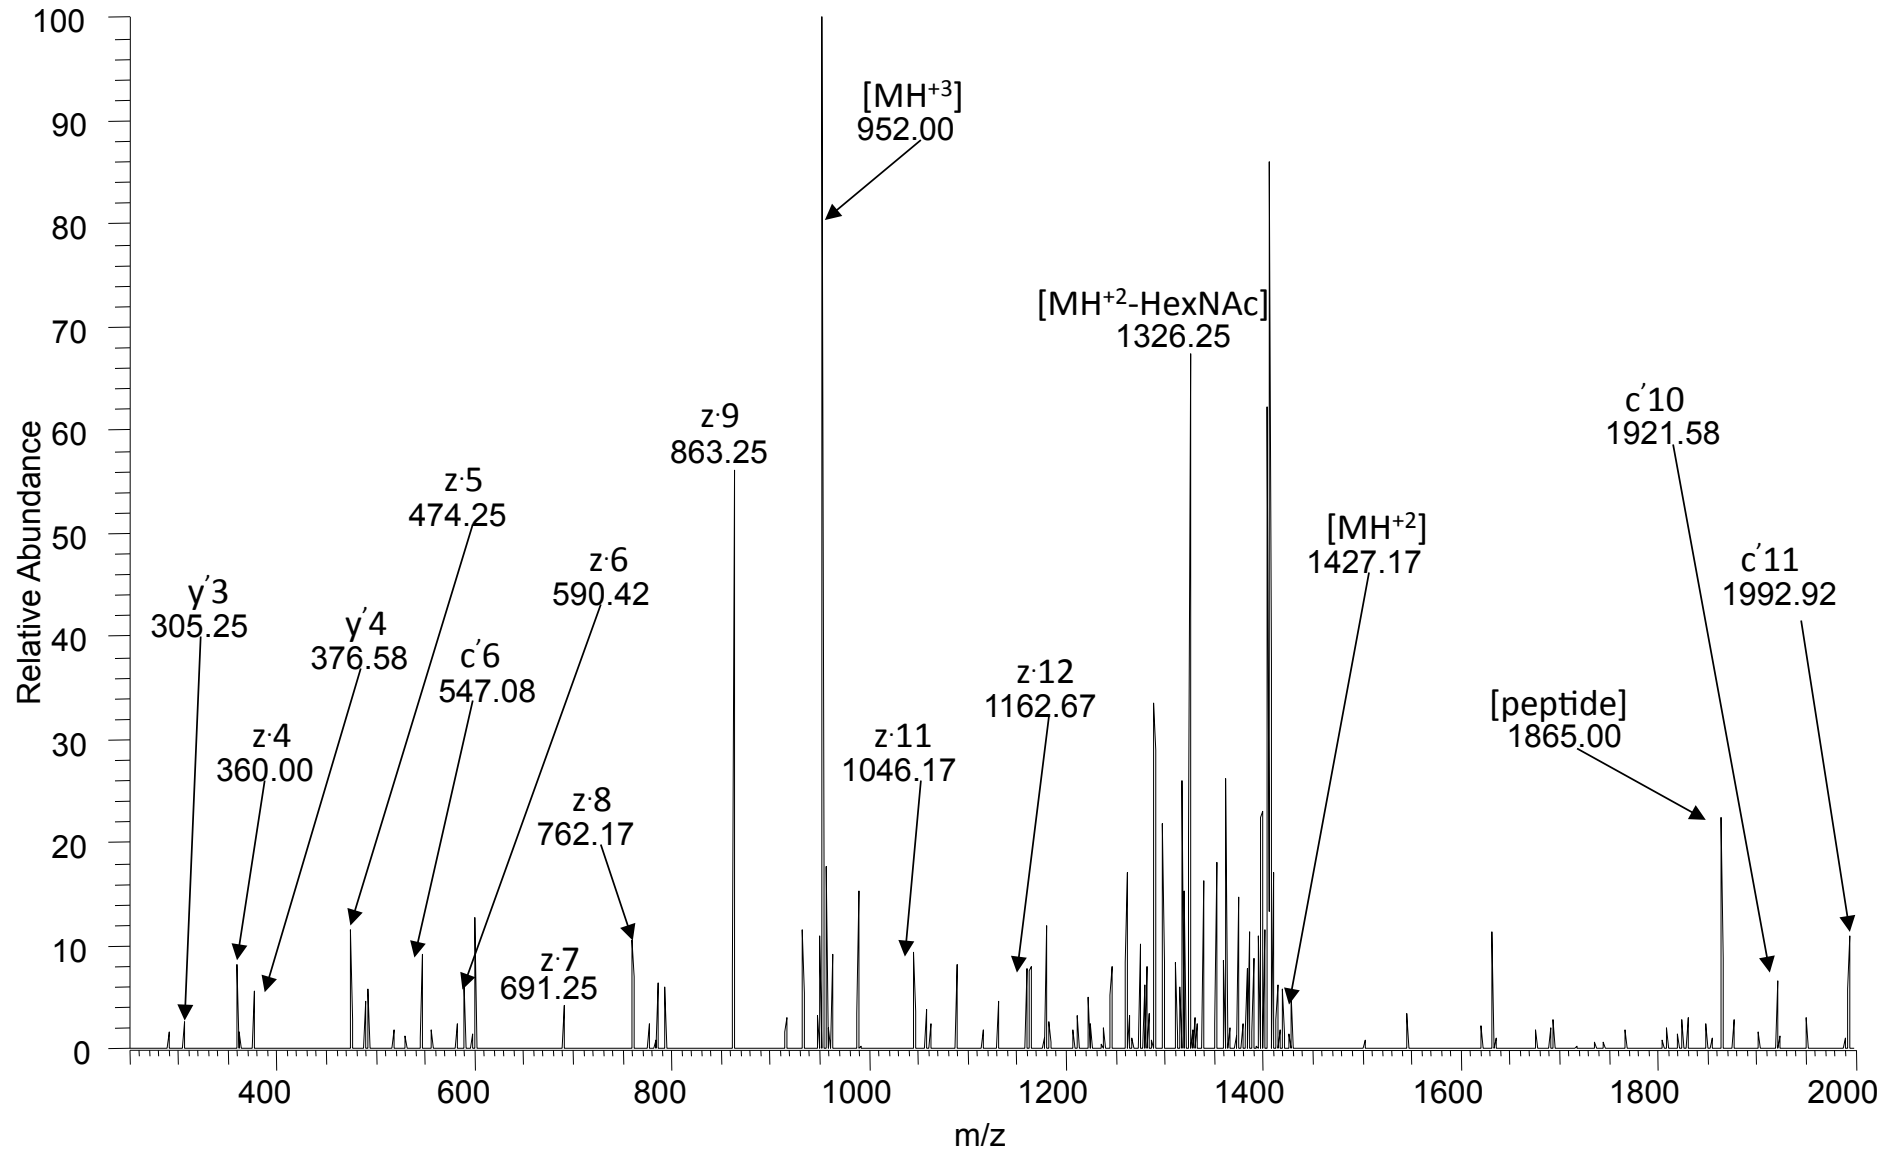

|                                             |  |
|---------------------------------------------|--|
| acinetobacter baumannii 19606               |  |
| Precursor charge: +3                        |  |
| Precursor m/z: 965.74292                    |  |
| Peptide mass (MH <sup>+</sup> ): 2895.21398 |  |

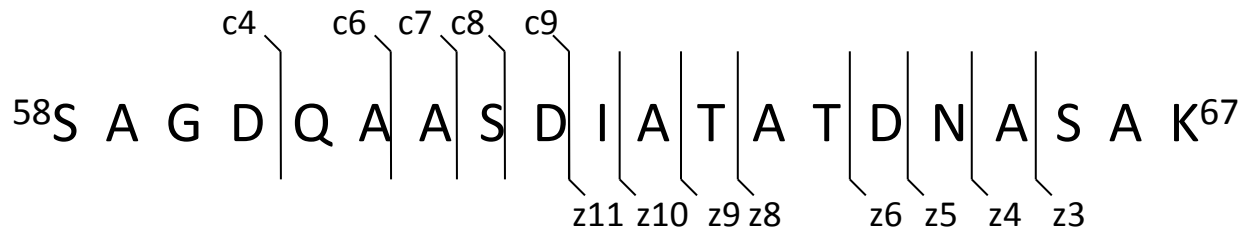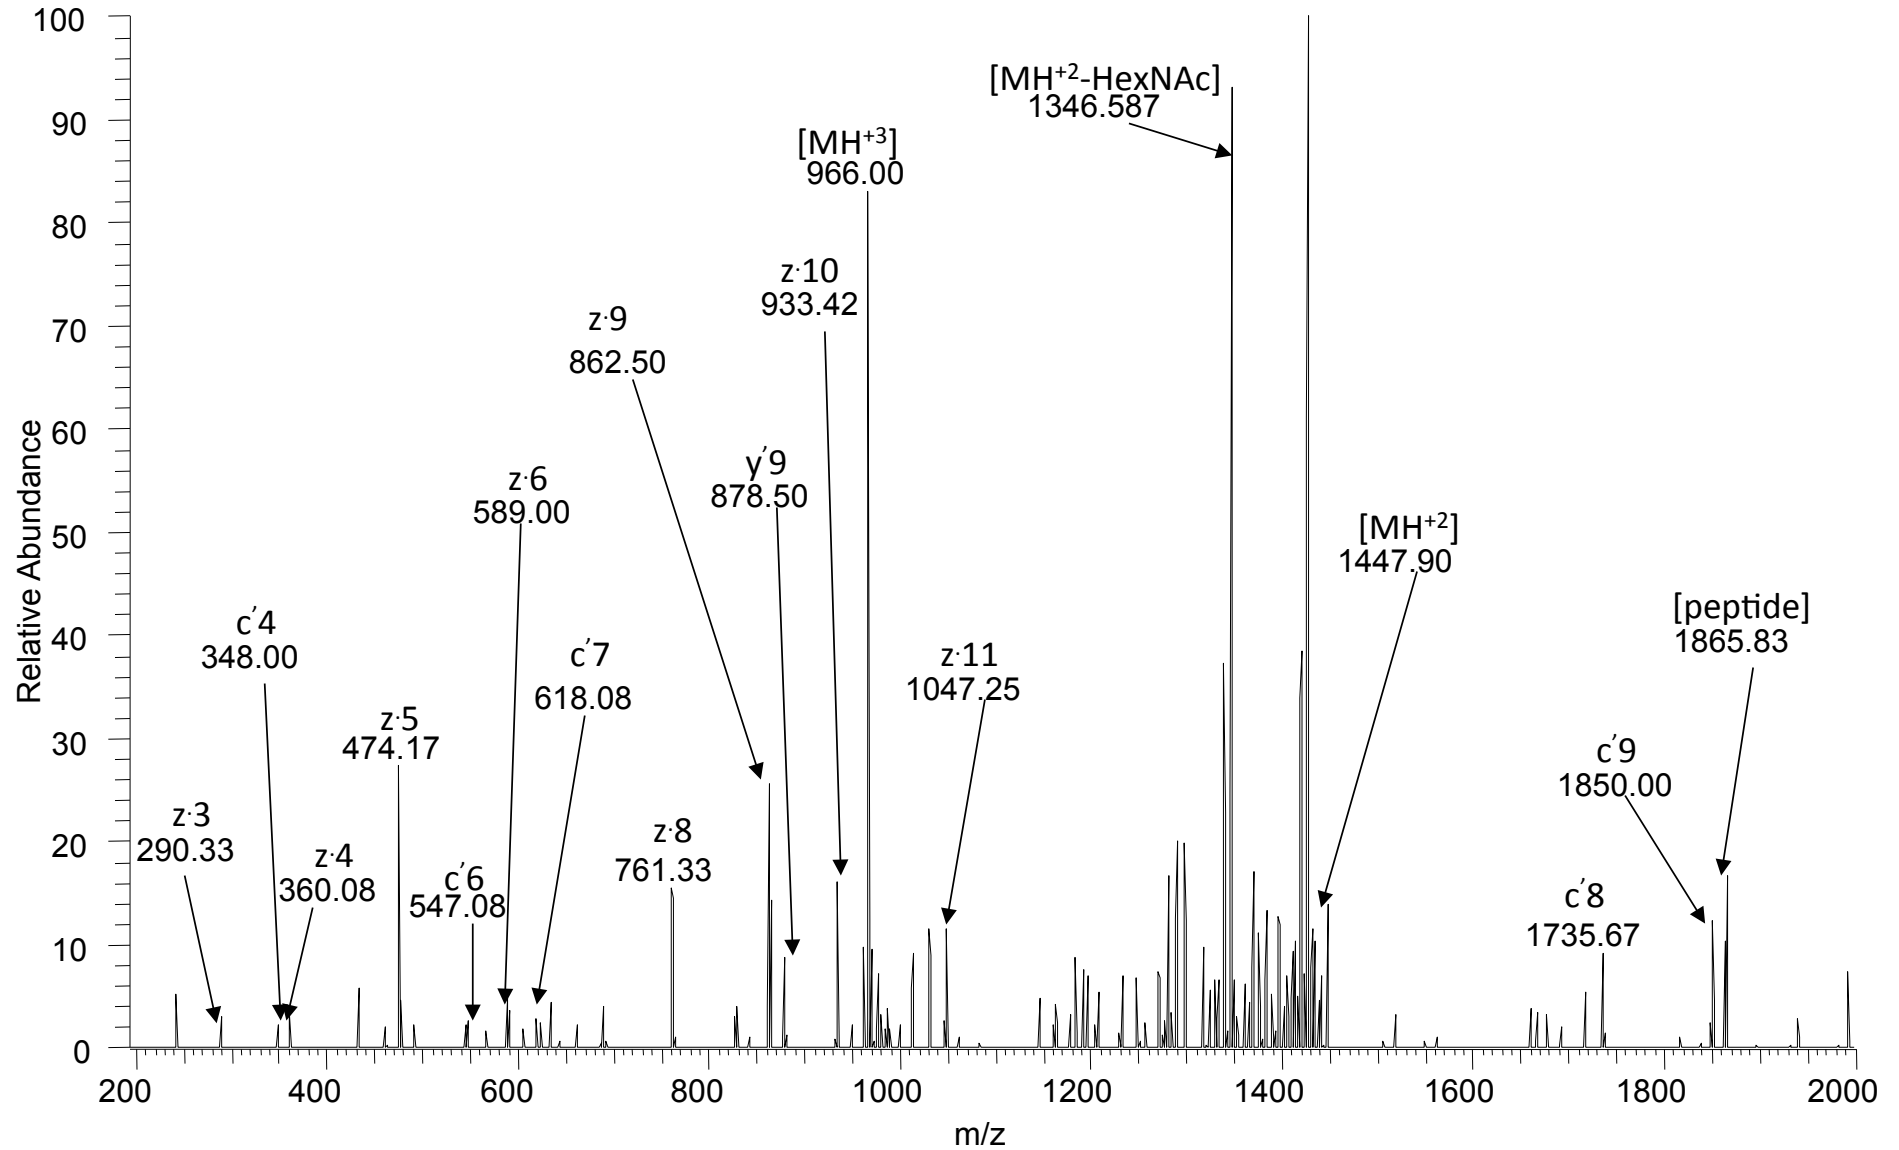

**Supplementary Table 10B: Glycosylation site localisation in *Acinetobacter baumannii* (strain ATCC19606)**

| Uniprot accession number | Site localisation             | five amino acid each side of the site |
|--------------------------|-------------------------------|---------------------------------------|
| D0C6C0_ACIBA             | S <sub>186</sub>              | EQKAASEPEQK                           |
| D0C6Q2_ACIBA             | S <sub>45</sub> <sup>+</sup>  | VETAVSEPQPQ                           |
| D0C7T4_ACIBA             | S <sub>40</sub> <sup>+</sup>  | GQDAASTAVAD                           |
| D0C8B9_ACIBA             | S <sub>35</sub> <sup>+</sup>  | GMHEASDPATS                           |
| D0CAB8_ACIBA             | S <sub>306</sub> <sup>+</sup> | KAKPASAPAVK                           |
| D0CA69_ACIBA             | S <sub>34</sub>               | AAGAASEAVAA                           |
| D0CA69_ACIBA             | S <sub>78</sub>               | SDVAASAAH--                           |
| D0CAB8_ACIBA             | S <sub>120</sub> <sup>+</sup> | KKTEASAAAAT                           |
| D0CDA9_ACIBA             | S <sub>123</sub>              | PAPVASQAK--                           |
| D0CDQ9_ACIBA             | S <sub>49</sub> <sup>+</sup>  | DEQPASSASVK                           |
| D0CEI7_ACIBA             | S <sub>55</sub> <sup>+</sup>  | GDQAASDIATA                           |

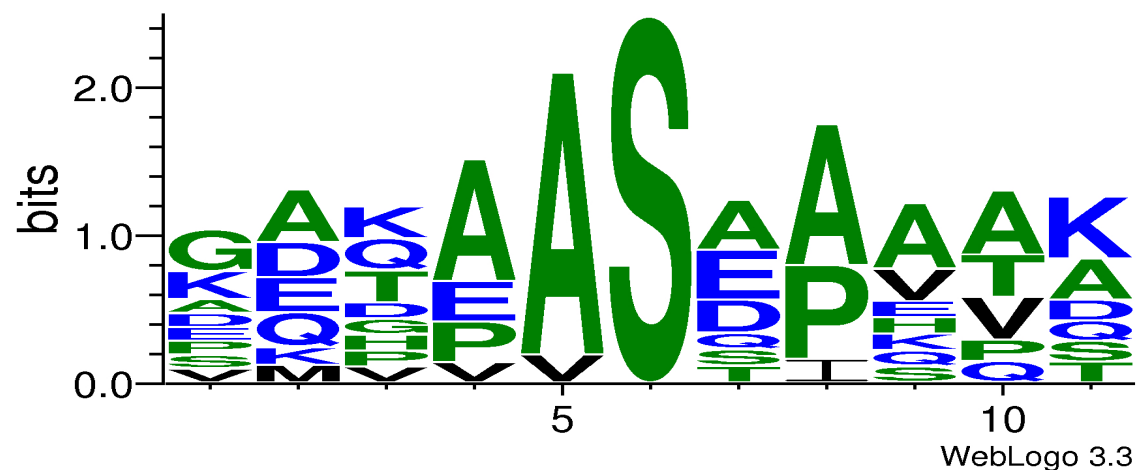

**Supplementary table 10B:** Glycosylation site localization in *A. baumannii* ATCC19606. Identifications are labeled according to the corresponding Uniprot accession number within strain ATCC19606. The site and residue of localization are denoted with + indicating sites localized by ETD. To enable assessment of the local environment of glycosylation five amino acids either side of the site of modification are provided.
